# Supplementary material for: Massively parallel identification of causal variants underlying gene expression differences in a yeast cross
Source: bioRxiv preprint, doi:10.1101/2020.08.31.276337, version 1 (2020-08-31)
Supplement: Table S1 [file 276337_file03.xlsx]

## Sheet: oligoDesign_TSS_UpStream_190924
oligoID	oligoBlock	gene	chr	TSS_pos	strand	sequence	numberVariants	variantIDs	variantPositions	alleleString	tilingOffset	designType	reverseComplementFlag
firstTileUTR_00001	YAL061W_5UTR_0	YAL061W_5UTR	chrI	33359	+	GGCGCGCCGGTCTTTTACCAATGACAAGGTTCAAGAATGAAGAGAACCACAAACACAGTCAGGTCCTTACTACTGCACATTACGACAGCCTTTATATACATTTTATCAAAAGCATTAACTAATGTGTTGCTAATAATCGCATCTGCCGGTCT	4	chrI_33293_A_T;chrI_33328_C_A;chrI_33347_T_A;chrI_33348_G_C	79;114;133;134	1111	0	firstTileUTR	FALSE
firstTileUTR_00002	YAL061W_5UTR_0	YAL061W_5UTR	chrI	33359	+	GGCGCGCCGGTCTTTTACCAATGACAAGGTTCAAGAATGAAGAGAACCACAAACACAGTCAGGTCCTTACTACAGCACATTACGACAGCCTTTATATACATTTTATCAAAAGCATTAACTAATGTGTTGCTAATAATCGCATCTGCCGGTCT	4	chrI_33293_A_T;chrI_33328_C_A;chrI_33347_T_A;chrI_33348_G_C	79;114;133;134	2111	0	firstTileUTR	FALSE
firstTileUTR_00003	YAL061W_5UTR_0	YAL061W_5UTR	chrI	33359	+	GGCGCGCCGGTCTTTTACCAATGACAAGGTTCAAGAATTAAGAGAACCACAAACACAGTCAGGTCCTTACTACTGCACATTACGACAGCCTTTATATACATTTTATCAAAAGCATTAACTAATGTGTTGCTAATAATCGCATCTGCCGGTCT	4	chrI_33293_A_T;chrI_33328_C_A;chrI_33347_T_A;chrI_33348_G_C	79;114;133;134	1211	0	firstTileUTR	FALSE
firstTileUTR_00004	YAL061W_5UTR_0	YAL061W_5UTR	chrI	33359	+	GGCGCGCCGGTCTTTTACCTATGACAAGGTTCAAGAATGAAGAGAACCACAAACACAGTCAGGTCCTTACTACTGCACATTACGACAGCCTTTATATACATTTTATCAAAAGCATTAACTAATGTGTTGCTAATAATCGCATCTGCCGGTCT	4	chrI_33293_A_T;chrI_33328_C_A;chrI_33347_T_A;chrI_33348_G_C	79;114;133;134	1121	0	firstTileUTR	FALSE
firstTileUTR_00005	YAL061W_5UTR_0	YAL061W_5UTR	chrI	33359	+	GGCGCGCCGGTCTTTTACGAATGACAAGGTTCAAGAATGAAGAGAACCACAAACACAGTCAGGTCCTTACTACTGCACATTACGACAGCCTTTATATACATTTTATCAAAAGCATTAACTAATGTGTTGCTAATAATCGCATCTGCCGGTCT	4	chrI_33293_A_T;chrI_33328_C_A;chrI_33347_T_A;chrI_33348_G_C	79;114;133;134	1112	0	firstTileUTR	FALSE
firstTileUTR_00006	YAL061W_5UTR_0	YAL061W_5UTR	chrI	33359	+	GGCGCGCCGGTCTTTTACGTATGACAAGGTTCAAGAATTAAGAGAACCACAAACACAGTCAGGTCCTTACTACAGCACATTACGACAGCCTTTATATACATTTTATCAAAAGCATTAACTAATGTGTTGCTAATAATCGCATCTGCCGGTCT	4	chrI_33293_A_T;chrI_33328_C_A;chrI_33347_T_A;chrI_33348_G_C	79;114;133;134	2222	0	firstTileUTR	FALSE
firstTileUTR_00007	YAL060W_5UTR_0	YAL060W_5UTR	chrI	35107	+	GGCGCGCCGGTCAATCGTACTAAGACTTTTTAAGAAAGAAGAAGGGCAACATCTGCCCAAAGGGCTTGAATTGGCCATTGTCACACGAAGTATCTGCCCCACTTTTATATGTCGATTTTTTTTTCTACGTTTCCACCTATTATCATATCAAG	3	chrI_34991_A_G;chrI_35059_G_A;chrI_35070_C_T	29;97;108	111	0	firstTileUTR	TRUE
firstTileUTR_00008	YAL060W_5UTR_0	YAL060W_5UTR	chrI	35107	+	GGCGCGCCGGTCAATCGTACTAAGACTTTTTAAGAAAGAAGAAGGGCAACATCTGCCCAAAGGGCTTGAATTGGCCATTGTCACACGAAGTATCTGCCCCACTTTTATATGTCGATTTTTTTTCCTACGTTTCCACCTATTATCATATCAAG	3	chrI_34991_A_G;chrI_35059_G_A;chrI_35070_C_T	29;97;108	211	0	firstTileUTR	TRUE
firstTileUTR_00009	YAL060W_5UTR_0	YAL060W_5UTR	chrI	35107	+	GGCGCGCCGGTCAATCGTACTAAGACTTTTTAAGAAAGAAGAAGGGCAACATCTGTCCAAAGGGCTTGAATTGGCCATTGTCACACGAAGTATCTGCCCCACTTTTATATGTCGATTTTTTTTTCTACGTTTCCACCTATTATCATATCAAG	3	chrI_34991_A_G;chrI_35059_G_A;chrI_35070_C_T	29;97;108	121	0	firstTileUTR	TRUE
firstTileUTR_00010	YAL060W_5UTR_0	YAL060W_5UTR	chrI	35107	+	GGCGCGCCGGTCAATCGTACTAAGACTTTTTAAGAAAGAAGAAGAGCAACATCTGCCCAAAGGGCTTGAATTGGCCATTGTCACACGAAGTATCTGCCCCACTTTTATATGTCGATTTTTTTTTCTACGTTTCCACCTATTATCATATCAAG	3	chrI_34991_A_G;chrI_35059_G_A;chrI_35070_C_T	29;97;108	112	0	firstTileUTR	TRUE
firstTileUTR_00011	YAL060W_5UTR_0	YAL060W_5UTR	chrI	35107	+	GGCGCGCCGGTCAATCGTACTAAGACTTTTTAAGAAAGAAGAAGAGCAACATCTGTCCAAAGGGCTTGAATTGGCCATTGTCACACGAAGTATCTGCCCCACTTTTATATGTCGATTTTTTTTCCTACGTTTCCACCTATTATCATATCAAG	3	chrI_34991_A_G;chrI_35059_G_A;chrI_35070_C_T	29;97;108	222	0	firstTileUTR	TRUE
firstTileUTR_00012	YAL059W_5UTR_0	YAL059W_5UTR	chrI	36507	+	GGCGCGCCAATACTTCTAAAGGGTCCTTAACCAAAAAAATTTTCAGCTCATCGCCAAGTTGAATAAAGGAAAAAAAAAGAAGAAAAAAAAAAATAATATAGTCGCAGAAACTTACTTCTGTCTGTTTCATAACAACAAATATTATAAAAGAA	1	chrI_36436_CT_C	74	1	0	firstTileUTR	FALSE
firstTileUTR_00013	YAL059W_5UTR_0	YAL059W_5UTR	chrI	36507	+	GGCGCGCCAATACTTCTAAAGGGTCCTTAACCAAAAAAATTTTCAGCTCATCGCCAAGTTGAATAAAGGAAAAAAAAGAAGAAAAAAAAAAATAATATAGTCGCAGAAACTTACTTCTGTCTGTTTCATAACAACAAATATTATAAAAGAA	1	chrI_36436_CT_C	74	2	0	firstTileUTR	FALSE
firstTileUTR_00014	YAL058W_5UTR_0	YAL058W_5UTR	chrI	37415	+	GGCGCGCCACTTTTTTACACAATCCTTAAACGACATGCATCACACGGTTTTCAGCTAACCCATAATAATTTTCTTTTTCTTAATCAACTTGATATTGAAAAAGTTGTAACTATTAATGAAGTTTTTCAATAATAGTATACATCCAGATATAT	4	chrI_37294_T_C;chrI_37315_T_A;chrI_37330_A_G;chrI_37409_A_C	24;45;60;139	1111	0	firstTileUTR	TRUE
firstTileUTR_00015	YAL058W_5UTR_0	YAL058W_5UTR	chrI	37415	+	GGCGCGCCACTTTTTTACACAATCCTTAAACGACATGCATCACACGGTTTTCAGCTAACCCATAATAATTTTCTTTTTCTTAATCAACTTGATATTGAAAAAGTTGTAACTATTAATGAAGTTTTTCAGTAATAGTATACATCCAGATATAT	4	chrI_37294_T_C;chrI_37315_T_A;chrI_37330_A_G;chrI_37409_A_C	24;45;60;139	2111	0	firstTileUTR	TRUE
firstTileUTR_00016	YAL058W_5UTR_0	YAL058W_5UTR	chrI	37415	+	GGCGCGCCACTTTTTTACACAATCCTTAAACGACATGCATCACACGGTTTTCAGCTAACCCATAATAATTTTCTTTTTCTTAATCAACTTGATATTGAAAAAGTTGTTACTATTAATGAAGTTTTTCAATAATAGTATACATCCAGATATAT	4	chrI_37294_T_C;chrI_37315_T_A;chrI_37330_A_G;chrI_37409_A_C	24;45;60;139	1211	0	firstTileUTR	TRUE
firstTileUTR_00017	YAL058W_5UTR_0	YAL058W_5UTR	chrI	37415	+	GGCGCGCCACTTTTTTACACAATCCTTAAACGACATGCATCACACGGTTTTCAGCTAACCCATAATAATTTTCTTTTTCTTAATCAACTTGACATTGAAAAAGTTGTAACTATTAATGAAGTTTTTCAATAATAGTATACATCCAGATATAT	4	chrI_37294_T_C;chrI_37315_T_A;chrI_37330_A_G;chrI_37409_A_C	24;45;60;139	1121	0	firstTileUTR	TRUE
firstTileUTR_00018	YAL058W_5UTR_0	YAL058W_5UTR	chrI	37415	+	GGCGCGCCACTTTGTTACACAATCCTTAAACGACATGCATCACACGGTTTTCAGCTAACCCATAATAATTTTCTTTTTCTTAATCAACTTGATATTGAAAAAGTTGTAACTATTAATGAAGTTTTTCAATAATAGTATACATCCAGATATAT	4	chrI_37294_T_C;chrI_37315_T_A;chrI_37330_A_G;chrI_37409_A_C	24;45;60;139	1112	0	firstTileUTR	TRUE
firstTileUTR_00019	YAL058W_5UTR_0	YAL058W_5UTR	chrI	37415	+	GGCGCGCCACTTTGTTACACAATCCTTAAACGACATGCATCACACGGTTTTCAGCTAACCCATAATAATTTTCTTTTTCTTAATCAACTTGACATTGAAAAAGTTGTTACTATTAATGAAGTTTTTCAGTAATAGTATACATCCAGATATAT	4	chrI_37294_T_C;chrI_37315_T_A;chrI_37330_A_G;chrI_37409_A_C	24;45;60;139	2222	0	firstTileUTR	TRUE
firstTileUTR_00020	YAL056W_5UTR_0	YAL056W_5UTR	chrI	39208	+	GGCGCGCCACTATTCTATTCCGTCTTATCGGGGATGCTAGTTGTTCTATGTTCGCTTAATTACGGGTTTTTCTTGTTGCATGATTACTTACTGCATGAAAAAATAAGATTTAACATCGGGTAAGTATTATACATCATCATTTAATCATGATG	4	chrI_39105_A_G;chrI_39123_C_T;chrI_39144_G_A;chrI_39162_C_G	42;60;81;99	1111	0	firstTileUTR	TRUE
firstTileUTR_00021	YAL056W_5UTR_0	YAL056W_5UTR	chrI	39208	+	GGCGCGCCACTATTCTATTCCGTCTTATCGGGGATGCTAGTTGTTCTATGTTCGCTTAATTACGGGTTTTTCTTGTTGCATGATTACTTACTGCATGAAAAAATAAGATTCAACATCGGGTAAGTATTATACATCATCATTTAATCATGATG	4	chrI_39105_A_G;chrI_39123_C_T;chrI_39144_G_A;chrI_39162_C_G	42;60;81;99	2111	0	firstTileUTR	TRUE
firstTileUTR_00022	YAL056W_5UTR_0	YAL056W_5UTR	chrI	39208	+	GGCGCGCCACTATTCTATTCCGTCTTATCGGGGATGCTAGTTGTTCTATGTTCGCTTAATTACGGGTTTTTCTTGTTGCATGATTACTTACTACATGAAAAAATAAGATTTAACATCGGGTAAGTATTATACATCATCATTTAATCATGATG	4	chrI_39105_A_G;chrI_39123_C_T;chrI_39144_G_A;chrI_39162_C_G	42;60;81;99	1211	0	firstTileUTR	TRUE
firstTileUTR_00023	YAL056W_5UTR_0	YAL056W_5UTR	chrI	39208	+	GGCGCGCCACTATTCTATTCCGTCTTATCGGGGATGCTAGTTGTTCTATGTTCGCTTAATTACGGGTTTTTTTTGTTGCATGATTACTTACTGCATGAAAAAATAAGATTTAACATCGGGTAAGTATTATACATCATCATTTAATCATGATG	4	chrI_39105_A_G;chrI_39123_C_T;chrI_39144_G_A;chrI_39162_C_G	42;60;81;99	1121	0	firstTileUTR	TRUE
firstTileUTR_00024	YAL056W_5UTR_0	YAL056W_5UTR	chrI	39208	+	GGCGCGCCACTATTCTATTCCGTCTTATCGGGGATGCTAGTTGTTCTATGTTCCCTTAATTACGGGTTTTTCTTGTTGCATGATTACTTACTGCATGAAAAAATAAGATTTAACATCGGGTAAGTATTATACATCATCATTTAATCATGATG	4	chrI_39105_A_G;chrI_39123_C_T;chrI_39144_G_A;chrI_39162_C_G	42;60;81;99	1112	0	firstTileUTR	TRUE
firstTileUTR_00025	YAL056W_5UTR_0	YAL056W_5UTR	chrI	39208	+	GGCGCGCCACTATTCTATTCCGTCTTATCGGGGATGCTAGTTGTTCTATGTTCCCTTAATTACGGGTTTTTTTTGTTGCATGATTACTTACTACATGAAAAAATAAGATTCAACATCGGGTAAGTATTATACATCATCATTTAATCATGATG	4	chrI_39105_A_G;chrI_39123_C_T;chrI_39144_G_A;chrI_39162_C_G	42;60;81;99	2222	0	firstTileUTR	TRUE
firstTileUTR_00026	YAL055W_5UTR_0	YAL055W_5UTR	chrI	42170	+	GGCGCGCCATCTTCTTCTTCTTTATTCTTCATTATTGTTTCATTGTCTATTTCATCAGCACAATCTTCCCTTATATTTTATTTTTTTTTTTTCGATTAATTGAATTAGGGGACTATGAACCTAATTGTTAATTTTTTGCCAAAATATTTCGC	1	chrI_42115_T_C	90	1	0	firstTileUTR	TRUE
firstTileUTR_00027	YAL055W_5UTR_0	YAL055W_5UTR	chrI	42170	+	GGCGCGCCATCTTCTTCTTCTTTATTCTTCATTATTGTTTCATTGTCTATTTCATCAGCACAGTCTTCCCTTATATTTTATTTTTTTTTTTTCGATTAATTGAATTAGGGGACTATGAACCTAATTGTTAATTTTTTGCCAAAATATTTCGC	1	chrI_42115_T_C	90	2	0	firstTileUTR	TRUE
firstTileUTR_00028	YAL054C_5UTR_0	YAL054C_5UTR	chrI	45073	-	GGCGCGCCATAGATAGAAAATATAAGAACAAGATATAACGTACTACCAGATAACCTAAGGGAGAAATATGCTTAGAATAGCCGCCCAGTTTATATACAAAATGAAGGGAGAACTATTTGCCACCGAGGAACTGTACCCCAACTGCAATACCC	1	chrI_45198_G_A	20	1	0	firstTileUTR	FALSE
firstTileUTR_00029	YAL054C_5UTR_0	YAL054C_5UTR	chrI	45073	-	GGCGCGCCATAGATAGAAAATATAAGAACAAGATATAACGTACTACCAGATAACCTAAGGGAGAAATATGCTTAGAATAGCCGCCCAGTTTATATACAAAATGAAGGGAGAACTATTTGCCACCGAGGAACTATACCCCAACTGCAATACCC	1	chrI_45198_G_A	20	2	0	firstTileUTR	FALSE
firstTileUTR_00030	YAL053W_5UTR_0	YAL053W_5UTR	chrI	45759	+	GGCGCGCCATATATATGCCATTCATATACTTTTAATAATGTTCTATACGTATTCCCGTGAAGGCATTAATGATTATCTTTTTCTTTAAAAATGCAAGATGGCTGAGTAGTCGCGCGAAAAAAAAAAAAAAAAGAAACAGCAAGGTTAATTTT	1	chrI_45634_C_CT	20	1	0	firstTileUTR	FALSE
firstTileUTR_00031	YAL053W_5UTR_0	YAL053W_5UTR	chrI	45759	+	GGCGCGCCATATATATGCCATTCATATACTTTTAATAATGTTCTATACGTATTCCCGTGAAGGCATTAATGATTATCTTTTTCTTTAAAAATGCAAGATGGCTGAGTAGTCGCGCGAAAAAAAAAAAAAAAAAGAAACAGCAAGGTTAATTTT	1	chrI_45634_C_CT	20	2	0	firstTileUTR	FALSE
firstTileUTR_00032	YAL049C_5UTR_0	YAL049C_5UTR	chrI	52661	-	GGCGCGCCGAGACCTTATCACCCTTTGAAGGTTTCTTGCAAATGAGCGTGGTTTGGCATTTTTTATCGGAAAGAAAAAAAGGGCTCCGCCTTAGGCCAGATATCATAGAAATGCAACACTTCCCTAATATAGAAATTTGGGCATTAATTATT	1	chrI_52733_A_G	73	1	0	firstTileUTR	FALSE
firstTileUTR_00033	YAL049C_5UTR_0	YAL049C_5UTR	chrI	52661	-	GGCGCGCCGAGACCTTATCACCCTTTGAAGGTTTCTTGCAAATGAGCGTGGTTTGGCATTTTTTATCGGAAAGAAAAAAGGGGCTCCGCCTTAGGCCAGATATCATAGAAATGCAACACTTCCCTAATATAGAAATTTGGGCATTAATTATT	1	chrI_52733_A_G	73	2	0	firstTileUTR	FALSE
firstTileUTR_00034	YAL047W-A_5UTR_0	YAL047W-A_5UTR	chrI	54262	+	GGCGCGCCTATCTTTGCCAAAGGGCTATAACACACCCAATATCACCTTTATTTGATGCCATGGTAGGTGAACTAAAGCCATTGGCTGTCATGGCTTTAAAAAGAATTTTTCTTTTAAGCGATTTAAACCAGGACTCATATTTAGATGACAAC	3	chrI_54175_A_G;chrI_54198_G_A;chrI_54244_A_G	58;81;127	111	0	firstTileUTR	FALSE
firstTileUTR_00035	YAL047W-A_5UTR_0	YAL047W-A_5UTR	chrI	54262	+	GGCGCGCCTATCTTTGCCAAAGGGCTATAACACACCCAATATCACCTTTATTTGATGCCATGGTAGGTGAACTAAAGCCATTGGCTGTCATGGCCTTAAAAAGAATTTTTCTTTTAAGCGATTTAAACCAGGACTCATATTTAGATGACAAC	3	chrI_54175_A_G;chrI_54198_G_A;chrI_54244_A_G	58;81;127	211	0	firstTileUTR	FALSE
firstTileUTR_00036	YAL047W-A_5UTR_0	YAL047W-A_5UTR	chrI	54262	+	GGCGCGCCTATCTTTGCCAAAGGGCTATAACACACCCAATATCACCTTTATTTGATGCCATGGTAGGTGAATTAAAGCCATTGGCTGTCATGGCTTTAAAAAGAATTTTTCTTTTAAGCGATTTAAACCAGGACTCATATTTAGATGACAAC	3	chrI_54175_A_G;chrI_54198_G_A;chrI_54244_A_G	58;81;127	121	0	firstTileUTR	TRUE
firstTileUTR_00037	YAL047W-A_5UTR_0	YAL047W-A_5UTR	chrI	54262	+	GGCGCGCCTATCTTTGCCAAAGGGCCATAACACACCCAATATCACCTTTATTTGATGCCATGGTAGGTGAACTAAAGCCATTGGCTGTCATGGCTTTAAAAAGAATTTTTCTTTTAAGCGATTTAAACCAGGACTCATATTTAGATGACAAC	3	chrI_54175_A_G;chrI_54198_G_A;chrI_54244_A_G	58;81;127	112	0	firstTileUTR	FALSE
firstTileUTR_00038	YAL047W-A_5UTR_0	YAL047W-A_5UTR	chrI	54262	+	GGCGCGCCTATCTTTGCCAAAGGGCCATAACACACCCAATATCACCTTTATTTGATGCCATGGTAGGTGAATTAAAGCCATTGGCTGTCATGGCCTTAAAAAGAATTTTTCTTTTAAGCGATTTAAACCAGGACTCATATTTAGATGACAAC	3	chrI_54175_A_G;chrI_54198_G_A;chrI_54244_A_G	58;81;127	222	0	firstTileUTR	FALSE
firstTileUTR_00039	YAL047C_5UTR_0	YAL047C_5UTR	chrI	56886	-	GGCGCGCCAGTTTTTTGATATTAGTGTTGCTTATGTGAAATTTCGCGATTTCAATTAAAATAATAAATACATATATAAAGAATATACACAGAGGGAAGCAAAAGTAAACTAAAAGTGATACTTACACGAGCTTTTTTGGTTCCAAACTGTTC	2	chrI_56888_G_GT;chrI_56904_G_C	143;127	11	0	firstTileUTR	FALSE
firstTileUTR_00040	YAL047C_5UTR_0	YAL047C_5UTR	chrI	56886	-	GGCGCGCCAGTTTTTTTGATATTAGTGTTGCTTATGTGAAATTTCGCGATTTCAATTAAAATAATAAATACATATATAAAGAATATACACAGAGGGAAGCAAAAGTAAACTAAAAGTGATACTTACACGAGCTTTTTTGGTTCCAAACTGTTC	2	chrI_56888_G_GT;chrI_56904_G_C	143;127	21	0	firstTileUTR	FALSE
firstTileUTR_00041	YAL047C_5UTR_0	YAL047C_5UTR	chrI	56886	-	GGCGCGCCAGTTTTTTGATATTAGTCTTGCTTATGTGAAATTTCGCGATTTCAATTAAAATAATAAATACATATATAAAGAATATACACAGAGGGAAGCAAAAGTAAACTAAAAGTGATACTTACACGAGCTTTTTTGGTTCCAAACTGTTC	2	chrI_56888_G_GT;chrI_56904_G_C	143;127	12	0	firstTileUTR	FALSE
firstTileUTR_00042	YAL047C_5UTR_0	YAL047C_5UTR	chrI	56886	-	GGCGCGCCAGTTTTTTTGATATTAGTCTTGCTTATGTGAAATTTCGCGATTTCAATTAAAATAATAAATACATATATAAAGAATATACACAGAGGGAAGCAAAAGTAAACTAAAAGTGATACTTACACGAGCTTTTTTGGTTCCAAACTGTTC	2	chrI_56888_G_GT;chrI_56904_G_C	143;127	22	0	firstTileUTR	FALSE
firstTileUTR_00043	YAL044C_5UTR_0	YAL044C_5UTR	chrI	58471	-	GGCGCGCCGGTATGCTTCATGTGGAGATTCCCTTTCCCATTAGATACTTGTTTGTTGGTCTGTATATATAGAAGAAAGAGTTAGCGAAAGTGACTCCGCCGCTGAATGACTCCTTACGGAAGTGTCAAAATTGCGAGGTCCCTATAGCACAG	3	chrI_58490_A_T;chrI_58494_C_T;chrI_58600_G_T	126;122;16	111	0	firstTileUTR	TRUE
firstTileUTR_00044	YAL044C_5UTR_0	YAL044C_5UTR	chrI	58471	-	GGCGCGCCGGTATGCTTCATGTGGAGTTTCCCTTTCCCATTAGATACTTGTTTGTTGGTCTGTATATATAGAAGAAAGAGTTAGCGAAAGTGACTCCGCCGCTGAATGACTCCTTACGGAAGTGTCAAAATTGCGAGGTCCCTATAGCACAG	3	chrI_58490_A_T;chrI_58494_C_T;chrI_58600_G_T	126;122;16	211	0	firstTileUTR	TRUE
firstTileUTR_00045	YAL044C_5UTR_0	YAL044C_5UTR	chrI	58471	-	GGCGCGCCGGTATGCTTCATGTGGAGATTCTCTTTCCCATTAGATACTTGTTTGTTGGTCTGTATATATAGAAGAAAGAGTTAGCGAAAGTGACTCCGCCGCTGAATGACTCCTTACGGAAGTGTCAAAATTGCGAGGTCCCTATAGCACAG	3	chrI_58490_A_T;chrI_58494_C_T;chrI_58600_G_T	126;122;16	121	0	firstTileUTR	TRUE
firstTileUTR_00046	YAL044C_5UTR_0	YAL044C_5UTR	chrI	58471	-	GGCGCGCCGGTATGCTTCATGTGGAGATTCCCTTTCCCATTAGATACTTGTTTGTTGGTCTGTATATATAGAAGAAAGAGTTAGCGAAAGTGACTCCGCCGCTGAATGACTCCTTACGGAAGTGTCAAAATTGCGATGTCCCTATAGCACAG	3	chrI_58490_A_T;chrI_58494_C_T;chrI_58600_G_T	126;122;16	112	0	firstTileUTR	TRUE
firstTileUTR_00047	YAL044C_5UTR_0	YAL044C_5UTR	chrI	58471	-	GGCGCGCCGGTATGCTTCATGTGGAGTTTCTCTTTCCCATTAGATACTTGTTTGTTGGTCTGTATATATAGAAGAAAGAGTTAGCGAAAGTGACTCCGCCGCTGAATGACTCCTTACGGAAGTGTCAAAATTGCGATGTCCCTATAGCACAG	3	chrI_58490_A_T;chrI_58494_C_T;chrI_58600_G_T	126;122;16	222	0	firstTileUTR	TRUE
firstTileUTR_00048	YAL041W_5UTR_0	YAL041W_5UTR	chrI	62776	+	GGCGCGCCGGTACTCTTCTGCTATCCTACCATAGCCACATTCTTGTTCTGTTTCTACCTTAAAGCTTCTGTTTTCCACTTCTTCCCACCAGTGCGTCGTTCTTCGCGATTATCGTACAATATGATATTTGTACAAGTAGTGATATACCAATT	1	chrI_62654_C_T	23	1	0	firstTileUTR	TRUE
firstTileUTR_00049	YAL041W_5UTR_0	YAL041W_5UTR	chrI	62776	+	GGCGCGCCGGTACTCTTCTGCTATCCTACCATAGCCACATTCTTGTTCTGTTTCTACCTTAAAGCTTCTGTTTTCCACTTCTTCCCACCAGTGCGTCGTTCTTCGCGATTATCGTACAATATGATATTTATACAAGTAGTGATATACCAATT	1	chrI_62654_C_T	23	2	0	firstTileUTR	TRUE
firstTileUTR_00050	YAL039C_5UTR_0	YAL039C_5UTR	chrI	69581	-	GGCGCGCCGCTATCTTATTAGCTGCCTATTTCATTTCTCTTAGTATTCGCATTTAAAGCTGAGAAATTTTTTGATAATCATTTCCCGATGAAAAGAAAAAAGGGAAAAAGTCGATAAAAAGAGGTAAGCGAAAAGAAAAAGAAAAAATAGAA	3	chrI_69603_T_C;chrI_69675_G_A;chrI_69678_A_G	123;51;48	111	0	firstTileUTR	FALSE
firstTileUTR_00051	YAL039C_5UTR_0	YAL039C_5UTR	chrI	69581	-	GGCGCGCCGCTATCTTATTAGCTGCCTATCTCATTTCTCTTAGTATTCGCATTTAAAGCTGAGAAATTTTTTGATAATCATTTCCCGATGAAAAGAAAAAAGGGAAAAAGTCGATAAAAAGAGGTAAGCGAAAAGAAAAAGAAAAAATAGAA	3	chrI_69603_T_C;chrI_69675_G_A;chrI_69678_A_G	123;51;48	211	0	firstTileUTR	FALSE
firstTileUTR_00052	YAL039C_5UTR_0	YAL039C_5UTR	chrI	69581	-	GGCGCGCCGCTATCTTATTAGCTGCCTATTTCATTTCTCTTAGTATTCGCATTTAAAGCTGAGAAATTTTTTGATAATCATTTCCCGATGAAAAGAAAAAAAGGAAAAAGTCGATAAAAAGAGGTAAGCGAAAAGAAAAAGAAAAAATAGAA	3	chrI_69603_T_C;chrI_69675_G_A;chrI_69678_A_G	123;51;48	121	0	firstTileUTR	FALSE
firstTileUTR_00053	YAL039C_5UTR_0	YAL039C_5UTR	chrI	69581	-	GGCGCGCCGCTATCTTATTAGCTGCCTATTTCATTTCTCTTAGTATTCGCATTTAAAGCTGAGAAATTTTTTGATAATCATTTCCCGATGAAAAGAAAAAAGGGGAAAAGTCGATAAAAAGAGGTAAGCGAAAAGAAAAAGAAAAAATAGAA	3	chrI_69603_T_C;chrI_69675_G_A;chrI_69678_A_G	123;51;48	112	0	firstTileUTR	FALSE
firstTileUTR_00054	YAL039C_5UTR_0	YAL039C_5UTR	chrI	69581	-	GGCGCGCCGCTATCTTATTAGCTGCCTATCTCATTTCTCTTAGTATTCGCATTTAAAGCTGAGAAATTTTTTGATAATCATTTCCCGATGAAAAGAAAAAAAGGGAAAAGTCGATAAAAAGAGGTAAGCGAAAAGAAAAAGAAAAAATAGAA	3	chrI_69603_T_C;chrI_69675_G_A;chrI_69678_A_G	123;51;48	222	0	firstTileUTR	FALSE
firstTileUTR_00055	YAL035W_5UTR_0	YAL035W_5UTR	chrI	76401	+	GGCGCGCCGCCCTTCTTATCCCCTCAAAGTTCACCTTTGCCACTTATTCTAGTGCAAGATCTCTTGCTTTCAATGGGCTTAAAGCTTGAAAAATTTTTTCACATCACAAGCGACGAGGGCCCGTTTTTTTCATCGATGAGCTATAAGAGTTT	2	chrI_76368_G_C;chrI_76386_G_A	112;130	11	0	firstTileUTR	TRUE
firstTileUTR_00056	YAL035W_5UTR_0	YAL035W_5UTR	chrI	76401	+	GGCGCGCCGCCCTTCTTATCCCCTCAAAGTTCACCTTTGCGACTTATTCTAGTGCAAGATCTCTTGCTTTCAATGGGCTTAAAGCTTGAAAAATTTTTTCACATCACAAGCGACGAGGGCCCGTTTTTTTCATCGATGAGCTATAAGAGTTT	2	chrI_76368_G_C;chrI_76386_G_A	112;130	21	0	firstTileUTR	TRUE
firstTileUTR_00057	YAL035W_5UTR_0	YAL035W_5UTR	chrI	76401	+	GGCGCGCCGCCCTTCTTATCCCTTCAAAGTTCACCTTTGCCACTTATTCTAGTGCAAGATCTCTTGCTTTCAATGGGCTTAAAGCTTGAAAAATTTTTTCACATCACAAGCGACGAGGGCCCGTTTTTTTCATCGATGAGCTATAAGAGTTT	2	chrI_76368_G_C;chrI_76386_G_A	112;130	12	0	firstTileUTR	TRUE
firstTileUTR_00058	YAL035W_5UTR_0	YAL035W_5UTR	chrI	76401	+	GGCGCGCCGCCCTTCTTATCCCTTCAAAGTTCACCTTTGCGACTTATTCTAGTGCAAGATCTCTTGCTTTCAATGGGCTTAAAGCTTGAAAAATTTTTTCACATCACAAGCGACGAGGGCCCGTTTTTTTCATCGATGAGCTATAAGAGTTT	2	chrI_76368_G_C;chrI_76386_G_A	112;130	22	0	firstTileUTR	TRUE
firstTileUTR_00059	YAL029C_5UTR_0	YAL029C_5UTR	chrI	92522	-	GGCGCGCCGCAGGTTTTCGATAAAAGAGACCCTATTCTCATCTACTACTGCTAAACTTCGAGATATTTTCGAATTTTTCAGTCTTTTCTTTTTTTTTTTTCGCATTAGTTCAGAACCCTAAAGAATGGTAAACATTCTATGGATAACCCGGA	1	chrI_92602_CT_C	65	1	0	firstTileUTR	TRUE
firstTileUTR_00060	YAL029C_5UTR_0	YAL029C_5UTR	chrI	92522	-	GGCGCGCCGCAGGTTTTCGATAAAAGAGACCCTATTCTCATCTACTACTGCTAAACTTCGAGATATTTTCGAATTTTTCAGTCTTTTCTTTTTTTTTTTCGCATTAGTTCAGAACCCTAAAGAATGGTAAACATTCTATGGATAACCCGGA	1	chrI_92602_CT_C	65	2	0	firstTileUTR	TRUE
firstTileUTR_00061	YAL027W_5UTR_0	YAL027W_5UTR	chrI	94607	+	GGCGCGCCGCCCTTTTTTCCACTCATCTTTCCACTTGATTAAAAATACCAGAAGAAGCACATTTTTACATTTATACGTTACATATGAAAAAATCACAGGATCATTTTTTGATATACAAATACTATTTTTTATTTATGCGATACTAGATGCTT	1	chrI_94472_G_A	10	1	0	firstTileUTR	TRUE
firstTileUTR_00062	YAL027W_5UTR_0	YAL027W_5UTR	chrI	94607	+	GGCGCGCCGCCCTTTTTTCCACTCATCTTTCCACTTGATTAAAAATACCAGAAGAAGCACATTTTTACATTTATACGTTACATATGAAAAAATCACAGGATCATTTTTTGATATACAAATACTATTTTTTATTTATGCGATATTAGATGCTT	1	chrI_94472_G_A	10	2	0	firstTileUTR	TRUE
firstTileUTR_00063	YAL023C_5UTR_0	YAL023C_5UTR	chrI	108639	-	GGCGCGCCGACCTTTTTTTTACCCTCAAAAAGAATGCAACACTATTAATAAACAGTACACGAAACGGATCTTTCCGTAAGTTCTTTCGTTCTTTTTTTTCGTATTCTTTTCTTATGTTTTTTTTTTTCAGGGCGACGTGTCCAATAATATGT	1	chrI_108747_GT_G	37	1	0	firstTileUTR	TRUE
firstTileUTR_00064	YAL023C_5UTR_0	YAL023C_5UTR	chrI	108639	-	GGCGCGCCGACCTTTTTTTTACCCTCAAAAAGAATGCAACACTATTAATAAACAGTACACGAAACGGATCTTTCCGTAAGTTCTTTCGTTCTTTTTTTTCGTATTCTTTTCTTATGTTTTTTTTTTCAGGGCGACGTGTCCAATAATATGT	1	chrI_108747_GT_G	37	2	0	firstTileUTR	TRUE
firstTileUTR_00065	YAL020C_5UTR_0	YAL020C_5UTR	chrI	114637	-	GGCGCGCCTTAATGATCACATTCCATCACTTGCGCTTTGGATCTGCCTGCATTATCAAGGCTCAAACGGCTGCGTTACCCCCGTCGCCGCGAAATTTTTCATAATTTTTCACTTTGTAGGATTAAAAGAGATCATGAGCCCATCTCGCAATG	1	chrI_114652_C_T	130	1	0	firstTileUTR	TRUE
firstTileUTR_00066	YAL020C_5UTR_0	YAL020C_5UTR	chrI	114637	-	GGCGCGCCTTAATGATCACATTTCATCACTTGCGCTTTGGATCTGCCTGCATTATCAAGGCTCAAACGGCTGCGTTACCCCCGTCGCCGCGAAATTTTTCATAATTTTTCACTTTGTAGGATTAAAAGAGATCATGAGCCCATCTCGCAATG	1	chrI_114652_C_T	130	2	0	firstTileUTR	TRUE
firstTileUTR_00067	YAL018C_5UTR_0	YAL018C_5UTR	chrI	119591	-	GGCGCGCCAACAACACTTATTCGTGGCAAGAACGAAAATAAAAAATGATTTGAAACTTCCTTTTCCACATCTATATCTATATATATATGTATATGTATAATACTTATTACTATGATATTATTCCATGTGTCACAAAACCAGAAAGATCCCGT	1	chrI_119659_T_G	77	1	0	firstTileUTR	FALSE
firstTileUTR_00068	YAL018C_5UTR_0	YAL018C_5UTR	chrI	119591	-	GGCGCGCCAACAACACTTATTCGTGGCAAGAACGAAAATAAAAAATGATTTGAAACTTCCTTTTCCACATCTATAGCTATATATATATGTATATGTATAATACTTATTACTATGATATTATTCCATGTGTCACAAAACCAGAAAGATCCCGT	1	chrI_119659_T_G	77	2	0	firstTileUTR	FALSE
firstTileUTR_00069	YAL012W_5UTR_0	YAL012W_5UTR	chrI	130744	+	GGCGCGCCATAGGCCTCAATTGTACTTTCAAAATTCAATCTGGCACGGCACAAGTTCCATCTACCTGGCATCTTATGCTTTAAATAACTGAAATATTTTTTTCTTTTCTTTTCCTCGAGGATTTTTATGGAAAAAAAAGTGTGGCGCCACAA	1	chrI_130613_C_CT	14	1	0	firstTileUTR	TRUE
firstTileUTR_00070	YAL012W_5UTR_0	YAL012W_5UTR	chrI	130744	+	GGCGCGCCATAGGCCTCAATTGTACTTTCAAAATTCAATCTGGCACGGCACAAGTTCCATCTACCTGGCATCTTATGCTTTAAATAACTGAAATATTTTTTTCTTTTCTTTTCCTCGAGGATTTTTATGGAAAAAAAAAGTGTGGCGCCACAA	1	chrI_130613_C_CT	14	2	0	firstTileUTR	TRUE
firstTileUTR_00071	YAL011W_5UTR_0	YAL011W_5UTR	chrI	132195	+	GGCGCGCCACTTGTCTACGGCGAGCGTTACTTCCAAATCGCATGCATATGCCTTTATGTATACTACTTCTGCACTATAATAACGATTTGGAAAAAACTAAATCATCTAACACGATTGATTGAGCACAGTATTAATGGATATTTTAGACTATA	1	chrI_132189_A_C	139	1	0	firstTileUTR	FALSE
firstTileUTR_00072	YAL011W_5UTR_0	YAL011W_5UTR	chrI	132195	+	GGCGCGCCACTTGGCTACGGCGAGCGTTACTTCCAAATCGCATGCATATGCCTTTATGTATACTACTTCTGCACTATAATAACGATTTGGAAAAAACTAAATCATCTAACACGATTGATTGAGCACAGTATTAATGGATATTTTAGACTATA	1	chrI_132189_A_C	139	2	0	firstTileUTR	FALSE
firstTileUTR_00073	YAL010C_5UTR_0	YAL010C_5UTR	chrI	135688	-	GGCGCGCCGTCTTTTTCCTAACGTATATTTGCTTTGTTTCTTCACTCAACAATAAAGTCAAAGTAAAATTAAATACTAATTATTCTTAAAAGGGAAGATGCGAAATTTAGCGAAAATCTATTGATTATACACACAAAGGAAGAAAGGTAGTG	1	chrI_135827_G_A	6	1	0	firstTileUTR	FALSE
firstTileUTR_00074	YAL010C_5UTR_0	YAL010C_5UTR	chrI	135688	-	GGCGCGCCGTCTTTTTCCTAACGTATATTTGCTTTGTTTCTTCACTCAACAATAAAGTCAAAGTAAAATTAAATACTAATTATTCTTAAAAGGGAAGATGCGAAATTTAGCGAAAATCTATTGATTATACACACAAAGGAAGAAAGATAGTG	1	chrI_135827_G_A	6	2	0	firstTileUTR	FALSE
firstTileUTR_00075	YAL008W_5UTR_0	YAL008W_5UTR	chrI	136866	+	GGCGCGCCGCTGTTGTATGTATAATAAGATGCCTTGTTTAACCAATTTCAACAACCCCTAGGTTTTCTAGCACTTGTTGGAAAACTTAAATATGAAATGACGGATTTGTAAAATTTTCACGACACAACAGCTTCACTTCTAATAATGTATAA	1	chrI_136814_T_C	93	1	0	firstTileUTR	FALSE
firstTileUTR_00076	YAL008W_5UTR_0	YAL008W_5UTR	chrI	136866	+	GGCGCGCCGCTGTTGTATGTATAATAAGATGCCTTGTTTAACCAATTTCAACAACCCCTGGGTTTTCTAGCACTTGTTGGAAAACTTAAATATGAAATGACGGATTTGTAAAATTTTCACGACACAACAGCTTCACTTCTAATAATGTATAA	1	chrI_136814_T_C	93	2	0	firstTileUTR	TRUE
firstTileUTR_00077	YAL007C_5UTR_0	YAL007C_5UTR	chrI	138414	-	GGCGCGCCGGCGGTGTCGATCCCTAAGGTTAATGAATCGAAATCACTGGAGATTTTGTTAGTTTTTCATTTTAACTAGTTCAAGTTTTGGCAGAATGTACTTTTTCGTGTTTCGGGACACGTCGCTGAAAAGGATTGAAATATAACCAAACG	1	chrI_138499_G_A	60	1	0	firstTileUTR	TRUE
firstTileUTR_00078	YAL007C_5UTR_0	YAL007C_5UTR	chrI	138414	-	GGCGCGCCGGCGGTGTCGATCCCTAAGGTTAATGAATCGAAATCACTGGAGATTTTGTTAGTTTTTCATTTTAACTAGTTCAAGTTTTGGCAAAATGTACTTTTTCGTGTTTCGGGACACGTCGCTGAAAAGGATTGAAATATAACCAAACG	1	chrI_138499_G_A	60	2	0	firstTileUTR	TRUE
firstTileUTR_00079	YAL004W_5UTR_0	YAL004W_5UTR	chrI	138797	+	GGCGCGCCGGAAAATTTCTGGTATGTTTTGTGTATCTAATATTATATAGCCTTAAATCACTACCTATTTTTCAGATCCGCCAAGGAAGCCACTCTGTGAACTTTAAATAATATTACAAATTGCTACAGCATCTCGAATTCAAGTGTTTTCAG	9	chrI_138655_G_A;chrI_138665_GAATT_G;chrI_138669_T_TGGGC;chrI_138748_AT_A;chrI_138770_A_G;chrI_138780_C_T;chrI_138785_C_T;chrI_138791_T_C;chrI_138793_T_C	3;13;17;96;118;128;133;139;141	111111111	0	firstTileUTR	TRUE
firstTileUTR_00080	YAL004W_5UTR_0	YAL004W_5UTR	chrI	138797	+	GGCGCGCCGGAAAATTTCTGGTATGTTTTGTGTATCTAATATTATATAGCCTTAAATCACTACCTATTTTTCAGATCCGCCAAGGAAGCCACTCTGTGAACTTTAAATAATATTACAAATTGCTACAGCATCTCGAATTCAAGTGTTTTTAG	9	chrI_138655_G_A;chrI_138665_GAATT_G;chrI_138669_T_TGGGC;chrI_138748_AT_A;chrI_138770_A_G;chrI_138780_C_T;chrI_138785_C_T;chrI_138791_T_C;chrI_138793_T_C	3;13;17;96;118;128;133;139;141	211111111	0	firstTileUTR	TRUE
firstTileUTR_00081	YAL004W_5UTR_0	YAL004W_5UTR	chrI	138797	+	GGCGCGCCGGAAAATTTCTGGTATGTTTTGTGTATCTAATATTATATAGCCTTAAATCACTACCTATTTTTCAGATCCGCCAAGGAAGCCACTCTGTGAACTTTAAATAATATTACAAATTGCTACAGCATCTCGCAAGTGTTTTCAG	9	chrI_138655_G_A;chrI_138665_GAATT_G;chrI_138669_T_TGGGC;chrI_138748_AT_A;chrI_138770_A_G;chrI_138780_C_T;chrI_138785_C_T;chrI_138791_T_C;chrI_138793_T_C	3;13;17;96;118;128;133;139;141	121111111	0	firstTileUTR	TRUE
firstTileUTR_00082	YAL004W_5UTR_0	YAL004W_5UTR	chrI	138797	+	GGCGCGCCGGAAAATTTCTGGTATGTTTTGTGTATCTAATATTATATAGCCTTAAATCACTACCTATTTTTCAGATCCGCCAAGGAAGCCACTCTGTGAACTTTAAATAATATTACAAATTGCTACAGCATCTCGGCCCAATTCAAGTGTTTTCAG	9	chrI_138655_G_A;chrI_138665_GAATT_G;chrI_138669_T_TGGGC;chrI_138748_AT_A;chrI_138770_A_G;chrI_138780_C_T;chrI_138785_C_T;chrI_138791_T_C;chrI_138793_T_C	3;13;17;96;118;128;133;139;141	112111111	0	firstTileUTR	TRUE
firstTileUTR_00083	YAL004W_5UTR_0	YAL004W_5UTR	chrI	138797	+	GGCGCGCCGGAAAATTTCTGGTATGTTTTGTGTATCTAATATTATATAGCCTTAATCACTACCTATTTTTCAGATCCGCCAAGGAAGCCACTCTGTGAACTTTAAATAATATTACAAATTGCTACAGCATCTCGAATTCAAGTGTTTTCAG	9	chrI_138655_G_A;chrI_138665_GAATT_G;chrI_138669_T_TGGGC;chrI_138748_AT_A;chrI_138770_A_G;chrI_138780_C_T;chrI_138785_C_T;chrI_138791_T_C;chrI_138793_T_C	3;13;17;96;118;128;133;139;141	111211111	0	firstTileUTR	TRUE
firstTileUTR_00084	YAL004W_5UTR_0	YAL004W_5UTR	chrI	138797	+	GGCGCGCCGGAAAATTTCTGGTATGTTTTGTGTACCTAATATTATATAGCCTTAAATCACTACCTATTTTTCAGATCCGCCAAGGAAGCCACTCTGTGAACTTTAAATAATATTACAAATTGCTACAGCATCTCGAATTCAAGTGTTTTCAG	9	chrI_138655_G_A;chrI_138665_GAATT_G;chrI_138669_T_TGGGC;chrI_138748_AT_A;chrI_138770_A_G;chrI_138780_C_T;chrI_138785_C_T;chrI_138791_T_C;chrI_138793_T_C	3;13;17;96;118;128;133;139;141	111121111	0	firstTileUTR	TRUE
firstTileUTR_00085	YAL004W_5UTR_0	YAL004W_5UTR	chrI	138797	+	GGCGCGCCGGAAAATTTCTGGTATATTTTGTGTATCTAATATTATATAGCCTTAAATCACTACCTATTTTTCAGATCCGCCAAGGAAGCCACTCTGTGAACTTTAAATAATATTACAAATTGCTACAGCATCTCGAATTCAAGTGTTTTCAG	9	chrI_138655_G_A;chrI_138665_GAATT_G;chrI_138669_T_TGGGC;chrI_138748_AT_A;chrI_138770_A_G;chrI_138780_C_T;chrI_138785_C_T;chrI_138791_T_C;chrI_138793_T_C	3;13;17;96;118;128;133;139;141	111112111	0	firstTileUTR	TRUE
firstTileUTR_00086	YAL004W_5UTR_0	YAL004W_5UTR	chrI	138797	+	GGCGCGCCGGAAAATTTCTAGTATGTTTTGTGTATCTAATATTATATAGCCTTAAATCACTACCTATTTTTCAGATCCGCCAAGGAAGCCACTCTGTGAACTTTAAATAATATTACAAATTGCTACAGCATCTCGAATTCAAGTGTTTTCAG	9	chrI_138655_G_A;chrI_138665_GAATT_G;chrI_138669_T_TGGGC;chrI_138748_AT_A;chrI_138770_A_G;chrI_138780_C_T;chrI_138785_C_T;chrI_138791_T_C;chrI_138793_T_C	3;13;17;96;118;128;133;139;141	111111211	0	firstTileUTR	TRUE
firstTileUTR_00087	YAL004W_5UTR_0	YAL004W_5UTR	chrI	138797	+	GGCGCGCCGGAAAGTTTCTGGTATGTTTTGTGTATCTAATATTATATAGCCTTAAATCACTACCTATTTTTCAGATCCGCCAAGGAAGCCACTCTGTGAACTTTAAATAATATTACAAATTGCTACAGCATCTCGAATTCAAGTGTTTTCAG	9	chrI_138655_G_A;chrI_138665_GAATT_G;chrI_138669_T_TGGGC;chrI_138748_AT_A;chrI_138770_A_G;chrI_138780_C_T;chrI_138785_C_T;chrI_138791_T_C;chrI_138793_T_C	3;13;17;96;118;128;133;139;141	111111121	0	firstTileUTR	TRUE
firstTileUTR_00088	YAL004W_5UTR_0	YAL004W_5UTR	chrI	138797	+	GGCGCGCCGGAGAATTTCTGGTATGTTTTGTGTATCTAATATTATATAGCCTTAAATCACTACCTATTTTTCAGATCCGCCAAGGAAGCCACTCTGTGAACTTTAAATAATATTACAAATTGCTACAGCATCTCGAATTCAAGTGTTTTCAG	9	chrI_138655_G_A;chrI_138665_GAATT_G;chrI_138669_T_TGGGC;chrI_138748_AT_A;chrI_138770_A_G;chrI_138780_C_T;chrI_138785_C_T;chrI_138791_T_C;chrI_138793_T_C	3;13;17;96;118;128;133;139;141	111111112	0	firstTileUTR	TRUE
firstTileUTR_00089	YAL004W_5UTR_0	YAL004W_5UTR	chrI	138797	+	GGCGCGCCGGAGAGTTTCTAGTATATTTTGTGTACCTAATATTATATAGCCTTAATCACTACCTATTTTTCAGATCCGCCAAGGAAGCCACTCTGTGAACTTTAAATAATATTACAAATTGCTACAGCATCTCGGCCCAAAGTGTTTTTAG	9	chrI_138655_G_A;chrI_138665_GAATT_G;chrI_138669_T_TGGGC;chrI_138748_AT_A;chrI_138770_A_G;chrI_138780_C_T;chrI_138785_C_T;chrI_138791_T_C;chrI_138793_T_C	3;13;17;96;118;128;133;139;141	222222222	0	firstTileUTR	TRUE
firstTileUTR_00090	YAL003W_5UTR_0	YAL003W_5UTR	chrI	142153	+	GGCGCGCCGGACTCTTCAGTGCTGAAAGGTAGAAAGCATGAGGTAAAAAGATAAAGAGTAGAAGGAAAAAAAAAAGAACCAACTAAATATAGTGGGTAGATAACCTTAAACTATTTATTTAGAGGCGACAATGTGAAAAATTTTTTCTTCAA	1	chrI_142111_CT_C	103	1	0	firstTileUTR	FALSE
firstTileUTR_00091	YAL003W_5UTR_0	YAL003W_5UTR	chrI	142153	+	GGCGCGCCGGACTCTTCAGTGCTGAAAGGTAGAAAGCATGAGGTAAAAGATAAAGAGTAGAAGGAAAAAAAAAAGAACCAACTAAATATAGTGGGTAGATAACCTTAAACTATTTATTTAGAGGCGACAATGTGAAAAATTTTTTCTTCAA	1	chrI_142111_CT_C	103	2	0	firstTileUTR	FALSE
firstTileUTR_00092	YAR002W_5UTR_0	YAR002W_5UTR	chrI	152215	+	GGCGCGCCAAAGGTCTGTTATTTGATGTTTAAAAGTACACATTACAATAAGCTTTCACTTGTAAATATATCTTTTATTTTCCGAGAGGAAAAAGTTTCAAAAAAAAAAAAAAAAAAAGAAGAAAAATAACTTTCTCATGTAATAAAAGGTAA	2	chrI_152105_C_CTTTTT;chrI_152155_A_G	35;85	11	0	firstTileUTR	FALSE
firstTileUTR_00093	YAR002W_5UTR_0	YAR002W_5UTR	chrI	152215	+	GGCGCGCCAAAGGTCTGTTATTTGATGTTTAAAAGTACACATTACAATAAGCTTTCACTTGTAAATATATCTTTTATTTTCCGAGAGGAAAAAGTTTCAAAAAAAAAAAAAAAAAAAAAAAAGAAGAAAAATAACTTTCTCATGTAATAAAAGGTAA	2	chrI_152105_C_CTTTTT;chrI_152155_A_G	35;85	21	0	firstTileUTR	FALSE
firstTileUTR_00094	YAR002W_5UTR_0	YAR002W_5UTR	chrI	152215	+	GGCGCGCCAAAGGTCTGTTATTTGATGTTTAAAAGTACACATTACAATAAGCTTTCACTTGTAAATACATCTTTTATTTTCCGAGAGGAAAAAGTTTCAAAAAAAAAAAAAAAAAAAGAAGAAAAATAACTTTCTCATGTAATAAAAGGTAA	2	chrI_152105_C_CTTTTT;chrI_152155_A_G	35;85	12	0	firstTileUTR	FALSE
firstTileUTR_00095	YAR002W_5UTR_0	YAR002W_5UTR	chrI	152215	+	GGCGCGCCAAAGGTCTGTTATTTGATGTTTAAAAGTACACATTACAATAAGCTTTCACTTGTAAATACATCTTTTATTTTCCGAGAGGAAAAAGTTTCAAAAAAAAAAAAAAAAAAAAAAAAGAAGAAAAATAACTTTCTCATGTAATAAAAGGTAA	2	chrI_152105_C_CTTTTT;chrI_152155_A_G	35;85	22	0	firstTileUTR	FALSE
firstTileUTR_00096	YAR002C-A_5UTR_0	YAR002C-A_5UTR	chrI	154740	-	GGCGCGCCGGTTACCTTTAAATACTTTTCCAAACTACAGAGGGAAGATAGAGTAAGTTTTGTATGTACACATTTCTGCTGATGTGTTTTTTTTTTTCAACTTATTACGCGATTCGTTTTTTTTTTACGGTAACAGAATACAGAATAAATTCA	3	chrI_154746_C_T;chrI_154817_GTT_GT;chrI_154847_GTT_GTTT	139;68;38	111	0	firstTileUTR	TRUE
firstTileUTR_00097	YAR002C-A_5UTR_0	YAR002C-A_5UTR	chrI	154740	-	GGCGCGCCGGTTATCTTTAAATACTTTTCCAAACTACAGAGGGAAGATAGAGTAAGTTTTGTATGTACACATTTCTGCTGATGTGTTTTTTTTTTTCAACTTATTACGCGATTCGTTTTTTTTTTACGGTAACAGAATACAGAATAAATTCA	3	chrI_154746_C_T;chrI_154817_GTT_GT;chrI_154847_GTT_GTTT	139;68;38	211	0	firstTileUTR	TRUE
firstTileUTR_00098	YAR002C-A_5UTR_0	YAR002C-A_5UTR	chrI	154740	-	GGCGCGCCGGTTACCTTTAAATACTTTTCCAAACTACAGAGGGAAGATAGAGTAAGTTTTGTATGTACACATTTCTGCTGATGTGTTTTTTTTTTCAACTTATTACGCGATTCGTTTTTTTTTTACGGTAACAGAATACAGAATAAATTCA	3	chrI_154746_C_T;chrI_154817_GTT_GT;chrI_154847_GTT_GTTT	139;68;38	121	0	firstTileUTR	TRUE
firstTileUTR_00099	YAR002C-A_5UTR_0	YAR002C-A_5UTR	chrI	154740	-	GGCGCGCCGGTTACCTTTAAATACTTTTCCAAACTACAGAGGGAAGATAGAGTAAGTTTTGTATGTACACATTTCTGCTGATGTGTTTTTTTTTTTCAACTTATTACGCGATTCGTTTTTTTTTTTACGGTAACAGAATACAGAATAAATTCA	3	chrI_154746_C_T;chrI_154817_GTT_GT;chrI_154847_GTT_GTTT	139;68;38	112	0	firstTileUTR	TRUE
firstTileUTR_00100	YAR002C-A_5UTR_0	YAR002C-A_5UTR	chrI	154740	-	GGCGCGCCGGTTATCTTTAAATACTTTTCCAAACTACAGAGGGAAGATAGAGTAAGTTTTGTATGTACACATTTCTGCTGATGTGTTTTTTTTTTCAACTTATTACGCGATTCGTTTTTTTTTTTACGGTAACAGAATACAGAATAAATTCA	3	chrI_154746_C_T;chrI_154817_GTT_GT;chrI_154847_GTT_GTTT	139;68;38	222	0	firstTileUTR	TRUE
firstTileUTR_00101	YAR003W_5UTR_0	YAR003W_5UTR	chrI	154920	+	GGCGCGCCAACCTATTATTTTATATATTCTCTATTTTTGTACGTGAATTTATTCTGTATTCTGTTACCGTAAAAAAAAAACGAATCGCGTAATAAGTTGAAAAAAAAAAACACATCAGCAGAAATGTGTACATACAAAACTTACTCTATCTT	2	chrI_154817_GTT_GT;chrI_154847_GTT_GTTT	42;72	11	0	firstTileUTR	FALSE
firstTileUTR_00102	YAR003W_5UTR_0	YAR003W_5UTR	chrI	154920	+	GGCGCGCCAACCTATTATTTTATATATTCTCTATTTTTGTACGTGAATTTATTCTGTATTCTGTTACCGTAAAAAAAAAACGAATCGCGTAATAAGTTGAAAAAAAAAACACATCAGCAGAAATGTGTACATACAAAACTTACTCTATCTT	2	chrI_154817_GTT_GT;chrI_154847_GTT_GTTT	42;72	21	0	firstTileUTR	FALSE
firstTileUTR_00103	YAR003W_5UTR_0	YAR003W_5UTR	chrI	154920	+	GGCGCGCCAACCTATTATTTTATATATTCTCTATTTTTGTACGTGAATTTATTCTGTATTCTGTTACCGTAAAAAAAAAAACGAATCGCGTAATAAGTTGAAAAAAAAAAACACATCAGCAGAAATGTGTACATACAAAACTTACTCTATCTT	2	chrI_154817_GTT_GT;chrI_154847_GTT_GTTT	42;72	12	0	firstTileUTR	FALSE
firstTileUTR_00104	YAR003W_5UTR_0	YAR003W_5UTR	chrI	154920	+	GGCGCGCCAACCTATTATTTTATATATTCTCTATTTTTGTACGTGAATTTATTCTGTATTCTGTTACCGTAAAAAAAAAAACGAATCGCGTAATAAGTTGAAAAAAAAAACACATCAGCAGAAATGTGTACATACAAAACTTACTCTATCTT	2	chrI_154817_GTT_GT;chrI_154847_GTT_GTTT	42;72	22	0	firstTileUTR	FALSE
firstTileUTR_00105	YAR007C_5UTR_0	YAR007C_5UTR	chrI	158682	-	GGCGCGCCAGTTTTTGTTTTACGTGTAGAACTTAAAGTGATAACATTTGTTCAAGTAAACCTTTATGTTAGTTCACGCGTCTTTTGTCGCCTCGTCTAATTTTTACGCGTGACATTTTTCCAAGCAGAGATATTTTATTGAGCAGCGAAGAA	2	chrI_158733_A_T;chrI_158824_G_C	94;3	11	0	firstTileUTR	TRUE
firstTileUTR_00106	YAR007C_5UTR_0	YAR007C_5UTR	chrI	158682	-	GGCGCGCCAGTTTTTGTTTTACGTGTAGAACTTAAAGTGATAACATTTGTTCAAGTAATCCTTTATGTTAGTTCACGCGTCTTTTGTCGCCTCGTCTAATTTTTACGCGTGACATTTTTCCAAGCAGAGATATTTTATTGAGCAGCGAAGAA	2	chrI_158733_A_T;chrI_158824_G_C	94;3	21	0	firstTileUTR	TRUE
firstTileUTR_00107	YAR007C_5UTR_0	YAR007C_5UTR	chrI	158682	-	GGCGCGCCAGTTTTTGTTTTACGTGTAGAACTTAAAGTGATAACATTTGTTCAAGTAAACCTTTATGTTAGTTCACGCGTCTTTTGTCGCCTCGTCTAATTTTTACGCGTGACATTTTTCCAAGCAGAGATATTTTATTGAGCAGCGAACAA	2	chrI_158733_A_T;chrI_158824_G_C	94;3	12	0	firstTileUTR	TRUE
firstTileUTR_00108	YAR007C_5UTR_0	YAR007C_5UTR	chrI	158682	-	GGCGCGCCAGTTTTTGTTTTACGTGTAGAACTTAAAGTGATAACATTTGTTCAAGTAATCCTTTATGTTAGTTCACGCGTCTTTTGTCGCCTCGTCTAATTTTTACGCGTGACATTTTTCCAAGCAGAGATATTTTATTGAGCAGCGAACAA	2	chrI_158733_A_T;chrI_158824_G_C	94;3	22	0	firstTileUTR	TRUE
firstTileUTR_00109	YAR008W_5UTR_0	YAR008W_5UTR	chrI	158864	+	GGCGCGCCGGATTTCTTATCGCATCACTTTCTTATTCTCTAACTCTTCTTCGCTGCTCAATAAAATATCTCTGCTTGGAAAAATGTCACGCGTAAAAATTAGACGAGGCGACAAAAGACGCGTGAACTAACATAAAGGTTTACTTGAACAAA	3	chrI_158733_A_T;chrI_158824_G_C;chrI_158827_G_A	14;105;108	111	0	firstTileUTR	FALSE
firstTileUTR_00110	YAR008W_5UTR_0	YAR008W_5UTR	chrI	158864	+	GGCGCGCCGGATTTCTTATCGCATCACTTTCTTATTCTCTAACTCTTCTTCGCTGCTCAATAAAATATCTCTGCTTGGAAAAATGTCACGCGTAAAAATTAGACGAGGCGACAAAAGACGCGTGAACTAACATAAAGGATTACTTGAACAAA	3	chrI_158733_A_T;chrI_158824_G_C;chrI_158827_G_A	14;105;108	211	0	firstTileUTR	FALSE
firstTileUTR_00111	YAR008W_5UTR_0	YAR008W_5UTR	chrI	158864	+	GGCGCGCCGGATTTCTTATCGCATCACTTTCTTATTCTCTAACTCTTGTTCGCTGCTCAATAAAATATCTCTGCTTGGAAAAATGTCACGCGTAAAAATTAGACGAGGCGACAAAAGACGCGTGAACTAACATAAAGGTTTACTTGAACAAA	3	chrI_158733_A_T;chrI_158824_G_C;chrI_158827_G_A	14;105;108	121	0	firstTileUTR	FALSE
firstTileUTR_00112	YAR008W_5UTR_0	YAR008W_5UTR	chrI	158864	+	GGCGCGCCGGATTTCTTATCGCATCACTTTCTTATTCTCTAACTTTTCTTCGCTGCTCAATAAAATATCTCTGCTTGGAAAAATGTCACGCGTAAAAATTAGACGAGGCGACAAAAGACGCGTGAACTAACATAAAGGTTTACTTGAACAAA	3	chrI_158733_A_T;chrI_158824_G_C;chrI_158827_G_A	14;105;108	112	0	firstTileUTR	FALSE
firstTileUTR_00113	YAR008W_5UTR_0	YAR008W_5UTR	chrI	158864	+	GGCGCGCCGGATTTCTTATCGCATCACTTTCTTATTCTCTAACTTTTGTTCGCTGCTCAATAAAATATCTCTGCTTGGAAAAATGTCACGCGTAAAAATTAGACGAGGCGACAAAAGACGCGTGAACTAACATAAAGGATTACTTGAACAAA	3	chrI_158733_A_T;chrI_158824_G_C;chrI_158827_G_A	14;105;108	222	0	firstTileUTR	FALSE
firstTileUTR_00114	YAR015W_5UTR_0	YAR015W_5UTR	chrI	169286	+	GGCGCGCCAACCGTCTTACCTCAAAGAATCTGGGTAAGAATATATAGAATGTATATATATATATATGTATGTCTATATGTATTAGATGGCATCTTCGAGATTAGTATTATTACATCCTCATCTCTCGCAAGAGTCAGACTGACTCGTGAATA	4	chrI_169205_C_T;chrI_169217_T_C;chrI_169243_C_T;chrI_169269_T_C	64;76;102;128	1111	0	firstTileUTR	TRUE
firstTileUTR_00115	YAR015W_5UTR_0	YAR015W_5UTR	chrI	169286	+	GGCGCGCCAACCGTCTTACCTCAAAGAATCTGGGTAAGAATATATAGAATGTATATATATATATATGTATGTCTATATGTATTAGATGACATCTTCGAGATTAGTATTATTACATCCTCATCTCTCGCAAGAGTCAGACTGACTCGTGAATA	4	chrI_169205_C_T;chrI_169217_T_C;chrI_169243_C_T;chrI_169269_T_C	64;76;102;128	2111	0	firstTileUTR	FALSE
firstTileUTR_00116	YAR015W_5UTR_0	YAR015W_5UTR	chrI	169286	+	GGCGCGCCAACCGTCTTACCTCAAAGAATCTGGGTAAGAATATATAGAATGTATATATATATATATGTATGTCTATGTGTATTAGATGGCATCTTCGAGATTAGTATTATTACATCCTCATCTCTCGCAAGAGTCAGACTGACTCGTGAATA	4	chrI_169205_C_T;chrI_169217_T_C;chrI_169243_C_T;chrI_169269_T_C	64;76;102;128	1211	0	firstTileUTR	TRUE
firstTileUTR_00117	YAR015W_5UTR_0	YAR015W_5UTR	chrI	169286	+	GGCGCGCCAACCGTCTTACCTCAAAGAATCTGGGTAAGAATATATAGAATATATATATATATATATGTATGTCTATATGTATTAGATGGCATCTTCGAGATTAGTATTATTACATCCTCATCTCTCGCAAGAGTCAGACTGACTCGTGAATA	4	chrI_169205_C_T;chrI_169217_T_C;chrI_169243_C_T;chrI_169269_T_C	64;76;102;128	1121	0	firstTileUTR	FALSE
firstTileUTR_00118	YAR015W_5UTR_0	YAR015W_5UTR	chrI	169286	+	GGCGCGCCAACCGTCTTACCTCAAGGAATCTGGGTAAGAATATATAGAATGTATATATATATATATGTATGTCTATATGTATTAGATGGCATCTTCGAGATTAGTATTATTACATCCTCATCTCTCGCAAGAGTCAGACTGACTCGTGAATA	4	chrI_169205_C_T;chrI_169217_T_C;chrI_169243_C_T;chrI_169269_T_C	64;76;102;128	1112	0	firstTileUTR	TRUE
firstTileUTR_00119	YAR015W_5UTR_0	YAR015W_5UTR	chrI	169286	+	GGCGCGCCAACCGTCTTACCTCAAGGAATCTGGGTAAGAATATATAGAATATATATATATATATATGTATGTCTATGTGTATTAGATGACATCTTCGAGATTAGTATTATTACATCCTCATCTCTCGCAAGAGTCAGACTGACTCGTGAATA	4	chrI_169205_C_T;chrI_169217_T_C;chrI_169243_C_T;chrI_169269_T_C	64;76;102;128	2222	0	firstTileUTR	TRUE
firstTileUTR_00120	YAR018C_5UTR_0	YAR018C_5UTR	chrI	171711	-	GGCGCGCCAGAGAATTGATTCAATTATCAAATAGCACTCTCATTGAAATTAGTATTGTGAATCTTGCTCTTTTCATGTTATATGATTTGATATTCTTTTGAAAAGTCGCTTTTATTTACGTTTAACCTAATTAGGAAACGTAATGAAAAAAT	1	chrI_171848_G_GA	8	1	0	firstTileUTR	TRUE
firstTileUTR_00121	YAR018C_5UTR_0	YAR018C_5UTR	chrI	171711	-	GGCGCGCCAGAGAATTGATTCAATTATCAAATAGCACTCTCATTGAAATTAGTATTGTGAATCTTGCTCTTTTCATGTTATATGATTTGATATTCTTTTGAAAAGTCGCTTTTATTTACGTTTAACCTAATTAGGAAACGTAATGAAAAAAAT	1	chrI_171848_G_GA	8	2	0	firstTileUTR	TRUE
firstTileUTR_00122	YAR023C_5UTR_0	YAR023C_5UTR	chrI	180697	-	GGCGCGCCCACAGTCTCTTTTCGAAATTTAGATGAGGACCATAGGCATGACTTATTTACTGAGATGTCCCTGCGTTAAAACTTTTACTGGCCGATTGCTAACTTTATATTTGTTAATAAAACTATTCACGCCTGTGTCCTAATTGTTGGATA	9	chrI_180726_G_C;chrI_180747_A_G;chrI_180787_C_T;chrI_180794_T_A;chrI_180818_C_A;chrI_180822_T_A;chrI_180829_T_TC;chrI_180831_A_T;chrI_180835_T_C	116;95;55;48;24;20;13;11;7	111111111	0	firstTileUTR	TRUE
firstTileUTR_00123	YAR023C_5UTR_0	YAR023C_5UTR	chrI	180697	-	GGCGCGCCCACAGTCTCTTTTCGAAATTTAGATGAGCACCATAGGCATGACTTATTTACTGAGATGTCCCTGCGTTAAAACTTTTACTGGCCGATTGCTAACTTTATATTTGTTAATAAAACTATTCACGCCTGTGTCCTAATTGTTGGATA	9	chrI_180726_G_C;chrI_180747_A_G;chrI_180787_C_T;chrI_180794_T_A;chrI_180818_C_A;chrI_180822_T_A;chrI_180829_T_TC;chrI_180831_A_T;chrI_180835_T_C	116;95;55;48;24;20;13;11;7	211111111	0	firstTileUTR	TRUE
firstTileUTR_00124	YAR023C_5UTR_0	YAR023C_5UTR	chrI	180697	-	GGCGCGCCCACAGTCTCTTTTCGAAATTTAGATGAGGACCATAGGCATGACTTATTTGCTGAGATGTCCCTGCGTTAAAACTTTTACTGGCCGATTGCTAACTTTATATTTGTTAATAAAACTATTCACGCCTGTGTCCTAATTGTTGGATA	9	chrI_180726_G_C;chrI_180747_A_G;chrI_180787_C_T;chrI_180794_T_A;chrI_180818_C_A;chrI_180822_T_A;chrI_180829_T_TC;chrI_180831_A_T;chrI_180835_T_C	116;95;55;48;24;20;13;11;7	121111111	0	firstTileUTR	TRUE
firstTileUTR_00125	YAR023C_5UTR_0	YAR023C_5UTR	chrI	180697	-	GGCGCGCCCACAGTCTCTTTTCGAAATTTAGATGAGGACCATAGGCATGACTTATTTACTGAGATGTCCCTGCGTTAAAACTTTTACTGGCCGATTGTTAACTTTATATTTGTTAATAAAACTATTCACGCCTGTGTCCTAATTGTTGGATA	9	chrI_180726_G_C;chrI_180747_A_G;chrI_180787_C_T;chrI_180794_T_A;chrI_180818_C_A;chrI_180822_T_A;chrI_180829_T_TC;chrI_180831_A_T;chrI_180835_T_C	116;95;55;48;24;20;13;11;7	112111111	0	firstTileUTR	TRUE
firstTileUTR_00126	YAR023C_5UTR_0	YAR023C_5UTR	chrI	180697	-	GGCGCGCCCACAGTCTCTTTTCGAAATTTAGATGAGGACCATAGGCATGACTTATTTACTGAGATGTCCCTGCGTTAAAACTTTTACTGGCCGATTGCTAACTTAATATTTGTTAATAAAACTATTCACGCCTGTGTCCTAATTGTTGGATA	9	chrI_180726_G_C;chrI_180747_A_G;chrI_180787_C_T;chrI_180794_T_A;chrI_180818_C_A;chrI_180822_T_A;chrI_180829_T_TC;chrI_180831_A_T;chrI_180835_T_C	116;95;55;48;24;20;13;11;7	111211111	0	firstTileUTR	TRUE
firstTileUTR_00127	YAR023C_5UTR_0	YAR023C_5UTR	chrI	180697	-	GGCGCGCCCACAGTCTCTTTTCGAAATTTAGATGAGGACCATAGGCATGACTTATTTACTGAGATGTCCCTGCGTTAAAACTTTTACTGGCCGATTGCTAACTTTATATTTGTTAATAAAACTATTCAAGCCTGTGTCCTAATTGTTGGATA	9	chrI_180726_G_C;chrI_180747_A_G;chrI_180787_C_T;chrI_180794_T_A;chrI_180818_C_A;chrI_180822_T_A;chrI_180829_T_TC;chrI_180831_A_T;chrI_180835_T_C	116;95;55;48;24;20;13;11;7	111121111	0	firstTileUTR	TRUE
firstTileUTR_00128	YAR023C_5UTR_0	YAR023C_5UTR	chrI	180697	-	GGCGCGCCCACAGTCTCTTTTCGAAATTTAGATGAGGACCATAGGCATGACTTATTTACTGAGATGTCCCTGCGTTAAAACTTTTACTGGCCGATTGCTAACTTTATATTTGTTAATAAAACTATTCACGCCAGTGTCCTAATTGTTGGATA	9	chrI_180726_G_C;chrI_180747_A_G;chrI_180787_C_T;chrI_180794_T_A;chrI_180818_C_A;chrI_180822_T_A;chrI_180829_T_TC;chrI_180831_A_T;chrI_180835_T_C	116;95;55;48;24;20;13;11;7	111112111	0	firstTileUTR	TRUE
firstTileUTR_00129	YAR023C_5UTR_0	YAR023C_5UTR	chrI	180697	-	GGCGCGCCCACAGTCTCTTTTCGAAATTTAGATGAGGACCATAGGCATGACTTATTTACTGAGATGTCCCTGCGTTAAAACTTTTACTGGCCGATTGCTAACTTTATATTTGTTAATAAAACTATTCACGCCTGTGTCCTCAATTGTTGGATA	9	chrI_180726_G_C;chrI_180747_A_G;chrI_180787_C_T;chrI_180794_T_A;chrI_180818_C_A;chrI_180822_T_A;chrI_180829_T_TC;chrI_180831_A_T;chrI_180835_T_C	116;95;55;48;24;20;13;11;7	111111211	0	firstTileUTR	TRUE
firstTileUTR_00130	YAR023C_5UTR_0	YAR023C_5UTR	chrI	180697	-	GGCGCGCCCACAGTCTCTTTTCGAAATTTAGATGAGGACCATAGGCATGACTTATTTACTGAGATGTCCCTGCGTTAAAACTTTTACTGGCCGATTGCTAACTTTATATTTGTTAATAAAACTATTCACGCCTGTGTCCTATTTGTTGGATA	9	chrI_180726_G_C;chrI_180747_A_G;chrI_180787_C_T;chrI_180794_T_A;chrI_180818_C_A;chrI_180822_T_A;chrI_180829_T_TC;chrI_180831_A_T;chrI_180835_T_C	116;95;55;48;24;20;13;11;7	111111121	0	firstTileUTR	TRUE
firstTileUTR_00131	YAR023C_5UTR_0	YAR023C_5UTR	chrI	180697	-	GGCGCGCCCACAGTCTCTTTTCGAAATTTAGATGAGGACCATAGGCATGACTTATTTACTGAGATGTCCCTGCGTTAAAACTTTTACTGGCCGATTGCTAACTTTATATTTGTTAATAAAACTATTCACGCCTGTGTCCTAATTGCTGGATA	9	chrI_180726_G_C;chrI_180747_A_G;chrI_180787_C_T;chrI_180794_T_A;chrI_180818_C_A;chrI_180822_T_A;chrI_180829_T_TC;chrI_180831_A_T;chrI_180835_T_C	116;95;55;48;24;20;13;11;7	111111112	0	firstTileUTR	TRUE
firstTileUTR_00132	YAR023C_5UTR_0	YAR023C_5UTR	chrI	180697	-	GGCGCGCCCACAGTCTCTTTTCGAAATTTAGATGAGCACCATAGGCATGACTTATTTGCTGAGATGTCCCTGCGTTAAAACTTTTACTGGCCGATTGTTAACTTAATATTTGTTAATAAAACTATTCAAGCCAGTGTCCTCATTTGCTGGATA	9	chrI_180726_G_C;chrI_180747_A_G;chrI_180787_C_T;chrI_180794_T_A;chrI_180818_C_A;chrI_180822_T_A;chrI_180829_T_TC;chrI_180831_A_T;chrI_180835_T_C	116;95;55;48;24;20;13;11;7	222222222	0	firstTileUTR	TRUE
firstTileUTR_00133	YAR027W_5UTR_0	YAR027W_5UTR	chrI	183671	+	GGCGCGCCGACGAAATATTTTAGCAATTCAGAACCCCTTTCATATTCTTTTTTTTTTTCATTTTTAGAGGCGTTTTTTCACTGATAGGTACAGCCTCCGAAATAATATATAGTGAAGATATAATAATAATAGTGCGAGCCTTTTACAGGGCC	10	chrI_183545_C_T;chrI_183566_AC_A;chrI_183569_A_T;chrI_183571_A_AGG;chrI_183590_A_G;chrI_183591_C_G;chrI_183596_C_T;chrI_183624_A_AG;chrI_183626_A_AG;chrI_183650_G_A	19;40;43;45;64;65;70;98;100;124	1111111111	0	firstTileUTR	TRUE
firstTileUTR_00134	YAR027W_5UTR_0	YAR027W_5UTR	chrI	183671	+	GGCGCGCCGACGAAATATTTTAGCAATTCAGAACCCCTTTCATATTCTTTTTTTTTTTCATTTTTAGAGGCGTTTTTTCACTGATAGGTACAGCCTCCGAAATAATATATAGTGAAGATATAATAATAATAGTACGAGCCTTTTACAGGGCC	10	chrI_183545_C_T;chrI_183566_AC_A;chrI_183569_A_T;chrI_183571_A_AGG;chrI_183590_A_G;chrI_183591_C_G;chrI_183596_C_T;chrI_183624_A_AG;chrI_183626_A_AG;chrI_183650_G_A	19;40;43;45;64;65;70;98;100;124	2111111111	0	firstTileUTR	TRUE
firstTileUTR_00135	YAR027W_5UTR_0	YAR027W_5UTR	chrI	183671	+	GGCGCGCCGACGAAATATTTTAGCAATTCAGAACCCCTTTCATATTCTTTTTTTTTTTCATTTTTAGAGGCGTTTTTTCACTGATAGGTACAGCCTCCGAAATAATATATATGAAGATATAATAATAATAGTGCGAGCCTTTTACAGGGCC	10	chrI_183545_C_T;chrI_183566_AC_A;chrI_183569_A_T;chrI_183571_A_AGG;chrI_183590_A_G;chrI_183591_C_G;chrI_183596_C_T;chrI_183624_A_AG;chrI_183626_A_AG;chrI_183650_G_A	19;40;43;45;64;65;70;98;100;124	1211111111	0	firstTileUTR	TRUE
firstTileUTR_00136	YAR027W_5UTR_0	YAR027W_5UTR	chrI	183671	+	GGCGCGCCGACGAAATATTTTAGCAATTCAGAACCCCTTTCATATTCTTTTTTTTTTTCATTTTTAGAGGCGTTTTTTCACTGATAGGTACAGCCTCCGAAATAATATAAAGTGAAGATATAATAATAATAGTGCGAGCCTTTTACAGGGCC	10	chrI_183545_C_T;chrI_183566_AC_A;chrI_183569_A_T;chrI_183571_A_AGG;chrI_183590_A_G;chrI_183591_C_G;chrI_183596_C_T;chrI_183624_A_AG;chrI_183626_A_AG;chrI_183650_G_A	19;40;43;45;64;65;70;98;100;124	1121111111	0	firstTileUTR	TRUE
firstTileUTR_00137	YAR027W_5UTR_0	YAR027W_5UTR	chrI	183671	+	GGCGCGCCGACGAAATATTTTAGCAATTCAGAACCCCTTTCATATTCTTTTTTTTTTTCATTTTTAGAGGCGTTTTTTCACTGATAGGTACAGCCTCCGAAATAATACCTATAGTGAAGATATAATAATAATAGTGCGAGCCTTTTACAGGGCC	10	chrI_183545_C_T;chrI_183566_AC_A;chrI_183569_A_T;chrI_183571_A_AGG;chrI_183590_A_G;chrI_183591_C_G;chrI_183596_C_T;chrI_183624_A_AG;chrI_183626_A_AG;chrI_183650_G_A	19;40;43;45;64;65;70;98;100;124	1112111111	0	firstTileUTR	TRUE
firstTileUTR_00138	YAR027W_5UTR_0	YAR027W_5UTR	chrI	183671	+	GGCGCGCCGACGAAATATTTTAGCAATTCAGAACCCCTTTCATATTCTTTTTTTTTTTCATTTTTAGAGGCGTTTTTTCACTGATAGGCACAGCCTCCGAAATAATATATAGTGAAGATATAATAATAATAGTGCGAGCCTTTTACAGGGCC	10	chrI_183545_C_T;chrI_183566_AC_A;chrI_183569_A_T;chrI_183571_A_AGG;chrI_183590_A_G;chrI_183591_C_G;chrI_183596_C_T;chrI_183624_A_AG;chrI_183626_A_AG;chrI_183650_G_A	19;40;43;45;64;65;70;98;100;124	1111211111	0	firstTileUTR	TRUE
firstTileUTR_00139	YAR027W_5UTR_0	YAR027W_5UTR	chrI	183671	+	GGCGCGCCGACGAAATATTTTAGCAATTCAGAACCCCTTTCATATTCTTTTTTTTTTTCATTTTTAGAGGCGTTTTTTCACTGATAGCTACAGCCTCCGAAATAATATATAGTGAAGATATAATAATAATAGTGCGAGCCTTTTACAGGGCC	10	chrI_183545_C_T;chrI_183566_AC_A;chrI_183569_A_T;chrI_183571_A_AGG;chrI_183590_A_G;chrI_183591_C_G;chrI_183596_C_T;chrI_183624_A_AG;chrI_183626_A_AG;chrI_183650_G_A	19;40;43;45;64;65;70;98;100;124	1111121111	0	firstTileUTR	TRUE
firstTileUTR_00140	YAR027W_5UTR_0	YAR027W_5UTR	chrI	183671	+	GGCGCGCCGACGAAATATTTTAGCAATTCAGAACCCCTTTCATATTCTTTTTTTTTTTCATTTTTAGAGGCGTTTTTTCACTAATAGGTACAGCCTCCGAAATAATATATAGTGAAGATATAATAATAATAGTGCGAGCCTTTTACAGGGCC	10	chrI_183545_C_T;chrI_183566_AC_A;chrI_183569_A_T;chrI_183571_A_AGG;chrI_183590_A_G;chrI_183591_C_G;chrI_183596_C_T;chrI_183624_A_AG;chrI_183626_A_AG;chrI_183650_G_A	19;40;43;45;64;65;70;98;100;124	1111112111	0	firstTileUTR	TRUE
firstTileUTR_00141	YAR027W_5UTR_0	YAR027W_5UTR	chrI	183671	+	GGCGCGCCGACGAAATATTTTAGCAATTCAGAACCCCTTTCATATTCTTTTTTTCTTTTCATTTTTAGAGGCGTTTTTTCACTGATAGGTACAGCCTCCGAAATAATATATAGTGAAGATATAATAATAATAGTGCGAGCCTTTTACAGGGCC	10	chrI_183545_C_T;chrI_183566_AC_A;chrI_183569_A_T;chrI_183571_A_AGG;chrI_183590_A_G;chrI_183591_C_G;chrI_183596_C_T;chrI_183624_A_AG;chrI_183626_A_AG;chrI_183650_G_A	19;40;43;45;64;65;70;98;100;124	1111111211	0	firstTileUTR	TRUE
firstTileUTR_00142	YAR027W_5UTR_0	YAR027W_5UTR	chrI	183671	+	GGCGCGCCGACGAAATATTTTAGCAATTCAGAACCCCTTTCATATTCTTTTTCTTTTTTCATTTTTAGAGGCGTTTTTTCACTGATAGGTACAGCCTCCGAAATAATATATAGTGAAGATATAATAATAATAGTGCGAGCCTTTTACAGGGCC	10	chrI_183545_C_T;chrI_183566_AC_A;chrI_183569_A_T;chrI_183571_A_AGG;chrI_183590_A_G;chrI_183591_C_G;chrI_183596_C_T;chrI_183624_A_AG;chrI_183626_A_AG;chrI_183650_G_A	19;40;43;45;64;65;70;98;100;124	1111111121	0	firstTileUTR	TRUE
firstTileUTR_00143	YAR027W_5UTR_0	YAR027W_5UTR	chrI	183671	+	GGCGCGCCGACGAAATATTTTAGCAATTTAGAACCCCTTTCATATTCTTTTTTTTTTTCATTTTTAGAGGCGTTTTTTCACTGATAGGTACAGCCTCCGAAATAATATATAGTGAAGATATAATAATAATAGTGCGAGCCTTTTACAGGGCC	10	chrI_183545_C_T;chrI_183566_AC_A;chrI_183569_A_T;chrI_183571_A_AGG;chrI_183590_A_G;chrI_183591_C_G;chrI_183596_C_T;chrI_183624_A_AG;chrI_183626_A_AG;chrI_183650_G_A	19;40;43;45;64;65;70;98;100;124	1111111112	0	firstTileUTR	TRUE
firstTileUTR_00144	YAR027W_5UTR_0	YAR027W_5UTR	chrI	183671	+	GGCGCGCCGACGAAATATTTTAGCAATTTAGAACCCCTTTCATATTCTTTTTCTTCTTTTCATTTTTAGAGGCGTTTTTTCACTAATAGCCACAGCCTCCGAAATAATACCTAAATGAAGATATAATAATAATAGTACGAGCCTTTTACAGGGCC	10	chrI_183545_C_T;chrI_183566_AC_A;chrI_183569_A_T;chrI_183571_A_AGG;chrI_183590_A_G;chrI_183591_C_G;chrI_183596_C_T;chrI_183624_A_AG;chrI_183626_A_AG;chrI_183650_G_A	19;40;43;45;64;65;70;98;100;124	2222222222	0	firstTileUTR	TRUE
firstTileUTR_00145	YAR028W_5UTR_0	YAR028W_5UTR	chrI	184836	+	GGCGCGCCAGCCAGCTGTTTTATGCTTTTTTAACGTTGTTCACCATTGTATTTATTATTTTTGAGGCATTTTTCACGTATTGTTGCAACGTCCCGAAGGGATTCGATGTGATCGAAAAGCGTCCCGGCTGATCTATTGTGATGACCAGCTAT	2	chrI_184718_CG_C;chrI_184781_C_CT	27;90	11	0	firstTileUTR	TRUE
firstTileUTR_00146	YAR028W_5UTR_0	YAR028W_5UTR	chrI	184836	+	GGCGCGCCAGCCAGCTGTTTTATGCTTTTTTAACGTTGTTCACCATTGTATTTATTATTTTTGAGGCATTTTTCACGTATTGTTGCAACGTCCCGAAGGGATTCGATGTGATCGAAAAGCGTCCGGCTGATCTATTGTGATGACCAGCTAT	2	chrI_184718_CG_C;chrI_184781_C_CT	27;90	21	0	firstTileUTR	TRUE
firstTileUTR_00147	YAR028W_5UTR_0	YAR028W_5UTR	chrI	184836	+	GGCGCGCCAGCCAGCTGTTTTATGCTTTTTTAACGTTGTTCACCATTGTATTTATTATTTTTAGAGGCATTTTTCACGTATTGTTGCAACGTCCCGAAGGGATTCGATGTGATCGAAAAGCGTCCCGGCTGATCTATTGTGATGACCAGCTAT	2	chrI_184718_CG_C;chrI_184781_C_CT	27;90	12	0	firstTileUTR	TRUE
firstTileUTR_00148	YAR028W_5UTR_0	YAR028W_5UTR	chrI	184836	+	GGCGCGCCAGCCAGCTGTTTTATGCTTTTTTAACGTTGTTCACCATTGTATTTATTATTTTTAGAGGCATTTTTCACGTATTGTTGCAACGTCCCGAAGGGATTCGATGTGATCGAAAAGCGTCCGGCTGATCTATTGTGATGACCAGCTAT	2	chrI_184718_CG_C;chrI_184781_C_CT	27;90	22	0	firstTileUTR	TRUE
firstTileUTR_00149	YAR029W_5UTR_0	YAR029W_5UTR	chrI	185918	+	GGCGCGCCAGCTTTTTTATTCACTAGTTATTCTTATAACTACAACACCAAACCCTTTTTGAGATCCTTTTTTTCTTTTTCTATTGTTTGGATTTTCTTGGCTGCATTATGCGAAGCGCAACAATAGAATGTGACAAAAACTGACAGAACCCT	2	chrI_185806_T_TTG;chrI_185916_C_A	33;143	11	0	firstTileUTR	TRUE
firstTileUTR_00150	YAR029W_5UTR_0	YAR029W_5UTR	chrI	185918	+	GGCGCGCCAGCTTTTTTATTCACTAGTTATTCTTATAACTACAACACCAAACCCTTTTTGAGATCCTTTTTTTCTTTTTCTATTGTTTGGATTTTCTTGGCTGCATTATGCGAAGCGCACAACAATAGAATGTGACAAAAACTGACAGAACCCT	2	chrI_185806_T_TTG;chrI_185916_C_A	33;143	21	0	firstTileUTR	TRUE
firstTileUTR_00151	YAR029W_5UTR_0	YAR029W_5UTR	chrI	185918	+	GGCGCGCCATCTTTTTTATTCACTAGTTATTCTTATAACTACAACACCAAACCCTTTTTGAGATCCTTTTTTTCTTTTTCTATTGTTTGGATTTTCTTGGCTGCATTATGCGAAGCGCAACAATAGAATGTGACAAAAACTGACAGAACCCT	2	chrI_185806_T_TTG;chrI_185916_C_A	33;143	12	0	firstTileUTR	TRUE
firstTileUTR_00152	YAR029W_5UTR_0	YAR029W_5UTR	chrI	185918	+	GGCGCGCCATCTTTTTTATTCACTAGTTATTCTTATAACTACAACACCAAACCCTTTTTGAGATCCTTTTTTTCTTTTTCTATTGTTTGGATTTTCTTGGCTGCATTATGCGAAGCGCACAACAATAGAATGTGACAAAAACTGACAGAACCCT	2	chrI_185806_T_TTG;chrI_185916_C_A	33;143	22	0	firstTileUTR	TRUE
firstTileUTR_00153	YAR035W_5UTR_0	YAR035W_5UTR	chrI	190149	+	GGCGCGCCGGTTATTGTCGTGGGTGTGCTTCTATGTTATGTGTGTCTTGTATATATATGCGCGTTCCAGTTGACGCTGATACAGCCCGCCGGGCGGACGGAAAGTCCGCGGGGATGACCGCGGACCGCCGGGCCGATGACTCTAGTGCTGAT	3	chrI_190025_C_T;chrI_190031_G_A;chrI_190132_C_T	21;27;128	111	0	firstTileUTR	TRUE
firstTileUTR_00154	YAR035W_5UTR_0	YAR035W_5UTR	chrI	190149	+	GGCGCGCCGGTTATTGTCGTGGGTGTGCTTCTATGTTATGTGTGTCTTGTATATATATGCGCGTTCCAGTTGACGCTGATACAGCCCGCCGGGCGGACGGAAAGTCCGCGGGGATGACCGCGGACCGCCGGACCGATGACTCTAGTGCTGAT	3	chrI_190025_C_T;chrI_190031_G_A;chrI_190132_C_T	21;27;128	211	0	firstTileUTR	TRUE
firstTileUTR_00155	YAR035W_5UTR_0	YAR035W_5UTR	chrI	190149	+	GGCGCGCCGGTTATTGTCGTGGGTGTGCTTCTATGTTATGTGTGTCTTGTATATATATGCGCGTTCCAGTTGACGCTGATACAGCCCGCCGGGCGGACGGAAAGTCCGCGGGGATGACCGCGGACTGCCGGGCCGATGACTCTAGTGCTGAT	3	chrI_190025_C_T;chrI_190031_G_A;chrI_190132_C_T	21;27;128	121	0	firstTileUTR	TRUE
firstTileUTR_00156	YAR035W_5UTR_0	YAR035W_5UTR	chrI	190149	+	GGCGCGCCGGTTATTGTCGTGGGTATGCTTCTATGTTATGTGTGTCTTGTATATATATGCGCGTTCCAGTTGACGCTGATACAGCCCGCCGGGCGGACGGAAAGTCCGCGGGGATGACCGCGGACCGCCGGGCCGATGACTCTAGTGCTGAT	3	chrI_190025_C_T;chrI_190031_G_A;chrI_190132_C_T	21;27;128	112	0	firstTileUTR	TRUE
firstTileUTR_00157	YAR035W_5UTR_0	YAR035W_5UTR	chrI	190149	+	GGCGCGCCGGTTATTGTCGTGGGTATGCTTCTATGTTATGTGTGTCTTGTATATATATGCGCGTTCCAGTTGACGCTGATACAGCCCGCCGGGCGGACGGAAAGTCCGCGGGGATGACCGCGGACTGCCGGACCGATGACTCTAGTGCTGAT	3	chrI_190025_C_T;chrI_190031_G_A;chrI_190132_C_T	21;27;128	222	0	firstTileUTR	TRUE
firstTileUTR_00158	YAR042W_5UTR_0	YAR042W_5UTR	chrI	192575	+	GGCGCGCCCCCTTTTTATTTTTTTTTTTTTTGGCAGTTTAATTTAGTTTGAGTGCTTCTATTTATCCAAGTTTTGAGTTTCCTTTTTCCTTTTTTTTTCTTTTTTTCCTTTCCCTTTTTGGTGCACGTTCGCTCGGCGAGTAAAAGAGGTA	4	chrI_192469_G_A;chrI_192531_C_T;chrI_192550_C_CAAAAAA;chrI_192551_CAAA_AAAA	38;100;119;120	1111	0	firstTileUTR	TRUE
firstTileUTR_00159	YAR042W_5UTR_0	YAR042W_5UTR	chrI	192575	+	GGCGCGCCCCCTTTTTATTTTTTTTTTTTTTGGCAGTTTAATTTAGTTTGAGTGCTTCTATTTATCCAAGTTTTGAGTTTCCTTTTTCCTTTTTTTTTCTTTTTTTCCTTTCCTTTTTTGGTGCACGTTCGCTCGGCGAGTAAAAGAGGTA	4	chrI_192469_G_A;chrI_192531_C_T;chrI_192550_C_CAAAAAA;chrI_192551_CAAA_AAAA	38;100;119;120	2111	0	firstTileUTR	TRUE
firstTileUTR_00160	YAR042W_5UTR_0	YAR042W_5UTR	chrI	192575	+	GGCGCGCCCCCTTTTTATTTTTTTTTTTTTTGGCAGTTTAATTTAGTTTGAATGCTTCTATTTATCCAAGTTTTGAGTTTCCTTTTTCCTTTTTTTTTCTTTTTTTCCTTTCCCTTTTTGGTGCACGTTCGCTCGGCGAGTAAAAGAGGTA	4	chrI_192469_G_A;chrI_192531_C_T;chrI_192550_C_CAAAAAA;chrI_192551_CAAA_AAAA	38;100;119;120	1211	0	firstTileUTR	TRUE
firstTileUTR_00161	YAR042W_5UTR_0	YAR042W_5UTR	chrI	192575	+	GGCGCGCCCCCTTTTTATTTTTTTTTTTTTTGTTTTTTGCAGTTTAATTTAGTTTGAGTGCTTCTATTTATCCAAGTTTTGAGTTTCCTTTTTCCTTTTTTTTTCTTTTTTTCCTTTCCCTTTTTGGTGCACGTTCGCTCGGCGAGTAAAAGAGGTA	4	chrI_192469_G_A;chrI_192531_C_T;chrI_192550_C_CAAAAAA;chrI_192551_CAAA_AAAA	38;100;119;120	1121	0	firstTileUTR	TRUE
firstTileUTR_00162	YAR042W_5UTR_0	YAR042W_5UTR	chrI	192575	+	GGCGCGCCCCCTTTTTATTTTTTTTTTTTTTTGCAGTTTAATTTAGTTTGAGTGCTTCTATTTATCCAAGTTTTGAGTTTCCTTTTTCCTTTTTTTTTCTTTTTTTCCTTTCCCTTTTTGGTGCACGTTCGCTCGGCGAGTAAAAGAGGTA	4	chrI_192469_G_A;chrI_192531_C_T;chrI_192550_C_CAAAAAA;chrI_192551_CAAA_AAAA	38;100;119;120	1112	0	firstTileUTR	TRUE
firstTileUTR_00163	YAR042W_5UTR_0	YAR042W_5UTR	chrI	192575	+	GGCGCGCCCCCTTTTTATTTTTTTTTTTTTTTTTTTTTGCAGTTTAATTTAGTTTGAATGCTTCTATTTATCCAAGTTTTGAGTTTCCTTTTTCCTTTTTTTTTCTTTTTTTCCTTTCCTTTTTTGGTGCACGTTCGCTCGGCGAGTAAAAGAGGTA	4	chrI_192469_G_A;chrI_192531_C_T;chrI_192550_C_CAAAAAA;chrI_192551_CAAA_AAAA	38;100;119;120	2222	0	firstTileUTR	TRUE
firstTileUTR_00164	YBL105C_5UTR_0	YBL105C_5UTR	chrII	17962	-	GGCGCGCCGTCGTATTACTTTCGATAGAGTAGATCAACTTTATTATCCACGCTTGTTAACTCTTTTCGTCGGTTTTTTTCGCCTTTAAAACTAGGCGGGCTGGGTAATGAAGATAGCAATGCCTCATAAATACAATGTTATACTAATTACGT	1	chrII_18004_C_T	103	1	0	firstTileUTR	TRUE
firstTileUTR_00165	YBL105C_5UTR_0	YBL105C_5UTR	chrII	17962	-	GGCGCGCCGTCGTATTACTTTCGATAGAGTAGATCAACTTTATTATCCATGCTTGTTAACTCTTTTCGTCGGTTTTTTTCGCCTTTAAAACTAGGCGGGCTGGGTAATGAAGATAGCAATGCCTCATAAATACAATGTTATACTAATTACGT	1	chrII_18004_C_T	103	2	0	firstTileUTR	TRUE
firstTileUTR_00166	YBL086C_5UTR_0	YBL086C_5UTR	chrII	62662	-	GGCGCGCCGAATGAAATTAGAAGGTGTTCACTCCTTCATTAGCAAGTGAGCTTTGCCGTTGTCACCGTACTTGGTCATCTTAAGAGATACAAAGGGGGGGGACCCTGAGAAAACTTCTCCCGAAAAAAAAAAAAGAAATATACCCACGCGTT	1	chrII_62747_AG_A	60	1	0	firstTileUTR	FALSE
firstTileUTR_00167	YBL086C_5UTR_0	YBL086C_5UTR	chrII	62662	-	GGCGCGCCGAATGAAATTAGAAGGTGTTCACTCCTTCATTAGCAAGTGAGCTTTGCCGTTGTCACCGTACTTGGTCATCTTAAGAGATACAAAGGGGGGGACCCTGAGAAAACTTCTCCCGAAAAAAAAAAAAGAAATATACCCACGCGTT	1	chrII_62747_AG_A	60	2	0	firstTileUTR	FALSE
firstTileUTR_00168	YBL081W_5UTR_0	YBL081W_5UTR	chrII	71552	+	GGCGCGCCGGCATCTTATTCGATGTATATAGTTCTTAATATCTAGTGAAAAATTTTTGACAAATTTCTCGAGACCTGAATCTTCGACACGCAAGAAAAAATTGAAAAATTAACGTGGACCCTGGGAAGCGATGAGCTAGAGAAGGTAAATAC	1	chrII_71431_G_A	24	1	0	firstTileUTR	FALSE
firstTileUTR_00169	YBL081W_5UTR_0	YBL081W_5UTR	chrII	71552	+	GGCGCGCCGGCATCTTATTCGATGTATATAGTTCTTAATATCTAGTGAAAAATTTTTGACAAATTTCTCGAGACCTGAATCTTCGACACGCAAGAAAAAATTGAAAAATTAACGTGGACCCTGGGAAGTGATGAGCTAGAGAAGGTAAATAC	1	chrII_71431_G_A	24	2	0	firstTileUTR	FALSE
firstTileUTR_00170	YBL080C_5UTR_0	YBL080C_5UTR	chrII	74711	-	GGCGCGCCGGTCTTTTTGGACAGGAATGCTAACAATAACACTATTACTAGGTGGTACGACTAAGTACATCACGTCAAGCTTATTACTACTATAACTACTATTATCATAACAAAAGGGAAAACTAAACCCTATCTAAACAAGGGTTATTTAAA	2	chrII_74739_T_G;chrII_74853_A_T	117;3	11	0	firstTileUTR	FALSE
firstTileUTR_00171	YBL080C_5UTR_0	YBL080C_5UTR	chrII	74711	-	GGCGCGCCGGTCTTTTTGGACAGGAATGCTAACAAGAACACTATTACTAGGTGGTACGACTAAGTACATCACGTCAAGCTTATTACTACTATAACTACTATTATCATAACAAAAGGGAAAACTAAACCCTATCTAAACAAGGGTTATTTAAA	2	chrII_74739_T_G;chrII_74853_A_T	117;3	21	0	firstTileUTR	FALSE
firstTileUTR_00172	YBL080C_5UTR_0	YBL080C_5UTR	chrII	74711	-	GGCGCGCCGGTCTTTTTGGACAGGAATGCTAACAATAACACTATTACTAGGTGGTACGACTAAGTACATCACGTCAAGCTTATTACTACTATAACTACTATTATCATAACAAAAGGGAAAACTAAACCCTATCTAAACAAGGGTTATTTTAA	2	chrII_74739_T_G;chrII_74853_A_T	117;3	12	0	firstTileUTR	FALSE
firstTileUTR_00173	YBL080C_5UTR_0	YBL080C_5UTR	chrII	74711	-	GGCGCGCCGGTCTTTTTGGACAGGAATGCTAACAAGAACACTATTACTAGGTGGTACGACTAAGTACATCACGTCAAGCTTATTACTACTATAACTACTATTATCATAACAAAAGGGAAAACTAAACCCTATCTAAACAAGGGTTATTTTAA	2	chrII_74739_T_G;chrII_74853_A_T	117;3	22	0	firstTileUTR	FALSE
firstTileUTR_00174	YBL076C_5UTR_0	YBL076C_5UTR	chrII	84277	-	GGCGCGCCGAAGCTTTTGGCTAAAGGTTGTAGGAAGTCGAGTAACATCACTCTAGTTTAAAGCGCAAAATGATATTTTTCATGCTTAAGAGTCATCATTGTTTCGAGATTTCTTGCGTGCTGCGGAAACAAAAAAAAAAAAAATTTTTCGTC	1	chrII_84412_AT_TT	10	1	0	firstTileUTR	FALSE
firstTileUTR_00175	YBL076C_5UTR_0	YBL076C_5UTR	chrII	84277	-	GGCGCGCCGAAGCTTTTGGCTAAAGGTTGTAGGAAGTCGAGTAACATCACTCTAGTTTAAAGCGCAAAATGATATTTTTCATGCTTAAGAGTCATCATTGTTTCGAGATTTCTTGCGTGCTGCGGAAACAAAAAAAAAAAAATTTTTTCGTC	1	chrII_84412_AT_TT	10	2	0	firstTileUTR	FALSE
firstTileUTR_00176	YBL074C_5UTR_0	YBL074C_5UTR	chrII	87800	-	GGCGCGCCGATATTTTATTTTTTAGCCCCATGTCCCAGCGATAAGGAGGATCTTTGGTGTCCATTCATCTCATTAAACCCTAAACCATTGAAATATTCGTGTTCGTGCGTCGCGATTTTTTCCGCTTTCAAGATGTGTCCTTTCTTCATCTC	1	chrII_87849_G_A	96	1	0	firstTileUTR	TRUE
firstTileUTR_00177	YBL074C_5UTR_0	YBL074C_5UTR	chrII	87800	-	GGCGCGCCGATATTTTATTTTTTAGCCCCATGTCCCAGCGATAAGGAGGATCTTTGATGTCCATTCATCTCATTAAACCCTAAACCATTGAAATATTCGTGTTCGTGCGTCGCGATTTTTTCCGCTTTCAAGATGTGTCCTTTCTTCATCTC	1	chrII_87849_G_A	96	2	0	firstTileUTR	TRUE
firstTileUTR_00178	YBL072C_5UTR_0	YBL072C_5UTR	chrII	89450	-	GGCGCGCCGGTGTGTTTATAACGTCTTCTTGTGAGTACCAAAAAGCAAATGGCAAGTGTAATTTCCTATAACTTTAAGATAGGCCTGTAAATAACGTATATGAAACAGTTCCATCCCGTAACACCATGAACACTGCGTAAGAGAAAGCCCTC	1	chrII_89547_A_G	48	1	0	firstTileUTR	FALSE
firstTileUTR_00179	YBL072C_5UTR_0	YBL072C_5UTR	chrII	89450	-	GGCGCGCCGGTGTGTTTATAACGTCTTCTTGTGAGTACCAAAAAGCAAATGGCAAGTGTAATTTCCTATAACTTTAAGATAGGCCTGTAAATAACGTATATGAAGCAGTTCCATCCCGTAACACCATGAACACTGCGTAAGAGAAAGCCCTC	1	chrII_89547_A_G	48	2	0	firstTileUTR	FALSE
firstTileUTR_00180	YBL055C_5UTR_0	YBL055C_5UTR	chrII	116889	-	GGCGCGCCAGTTGTCCATTGCTACCAGGACATCACCACTGGGCCCTTCCAGCATGCTGGAAAGATTGTTCTTAGAAGAGTGCTGTTCTAAGTAACCCGGCGTTAGTAGGGGCTAAGCCTTCTAGAAGGCCGGAAAAGGCTCAGAAATGCCTG	2	chrII_116939_G_A;chrII_116947_T_G	95;87	11	0	firstTileUTR	FALSE
firstTileUTR_00181	YBL055C_5UTR_0	YBL055C_5UTR	chrII	116889	-	GGCGCGCCAGTTGTCCATTGCTACCAGGACATCACCACTGGGCCCTTCCAGCATGCTAGAAAGATTGTTCTTAGAAGAGTGCTGTTCTAAGTAACCCGGCGTTAGTAGGGGCTAAGCCTTCTAGAAGGCCGGAAAAGGCTCAGAAATGCCTG	2	chrII_116939_G_A;chrII_116947_T_G	95;87	21	0	firstTileUTR	FALSE
firstTileUTR_00182	YBL055C_5UTR_0	YBL055C_5UTR	chrII	116889	-	GGCGCGCCAGTTGTCCATTGCTACCAGGACATCACCACTGGGCCCTTCCAGCATGCTGGAAAGATGGTTCTTAGAAGAGTGCTGTTCTAAGTAACCCGGCGTTAGTAGGGGCTAAGCCTTCTAGAAGGCCGGAAAAGGCTCAGAAATGCCTG	2	chrII_116939_G_A;chrII_116947_T_G	95;87	12	0	firstTileUTR	FALSE
firstTileUTR_00183	YBL055C_5UTR_0	YBL055C_5UTR	chrII	116889	-	GGCGCGCCAGTTGTCCATTGCTACCAGGACATCACCACTGGGCCCTTCCAGCATGCTAGAAAGATGGTTCTTAGAAGAGTGCTGTTCTAAGTAACCCGGCGTTAGTAGGGGCTAAGCCTTCTAGAAGGCCGGAAAAGGCTCAGAAATGCCTG	2	chrII_116939_G_A;chrII_116947_T_G	95;87	22	0	firstTileUTR	FALSE
firstTileUTR_00184	YBL051C_5UTR_0	YBL051C_5UTR	chrII	124822	-	GGCGCGCCACTTCTTCTTGCGCTAATCTCCAAAGACCTGCTGGTAATCTCAGCTGAAAGGCTGCCTTTAATTGTTATTCTTTTCCAGGAAAAAATCGCAAAGTTGCAGCATCCGTGTTTCGTGACATCATTGAAGGTTACCCTAATCTATTA	2	chrII_124932_T_C;chrII_124959_A_C	35;8	11	0	firstTileUTR	TRUE
firstTileUTR_00185	YBL051C_5UTR_0	YBL051C_5UTR	chrII	124822	-	GGCGCGCCACTTCTTCTTGCGCTAATCTCCAAAGACCTGCTGGTAATCTCAGCTGAAAGGCTGCCTTTAATTGTTATTCTTTTCCAGGAAAAAATCGCAAAGTTGCAGCATCCGTGTCTCGTGACATCATTGAAGGTTACCCTAATCTATTA	2	chrII_124932_T_C;chrII_124959_A_C	35;8	21	0	firstTileUTR	TRUE
firstTileUTR_00186	YBL051C_5UTR_0	YBL051C_5UTR	chrII	124822	-	GGCGCGCCACTTCTTCTTGCGCTAATCTCCAAAGACCTGCTGGTAATCTCAGCTGAAAGGCTGCCTTTAATTGTTATTCTTTTCCAGGAAAAAATCGCAAAGTTGCAGCATCCGTGTTTCGTGACATCATTGAAGGTTACCCTACTCTATTA	2	chrII_124932_T_C;chrII_124959_A_C	35;8	12	0	firstTileUTR	TRUE
firstTileUTR_00187	YBL051C_5UTR_0	YBL051C_5UTR	chrII	124822	-	GGCGCGCCACTTCTTCTTGCGCTAATCTCCAAAGACCTGCTGGTAATCTCAGCTGAAAGGCTGCCTTTAATTGTTATTCTTTTCCAGGAAAAAATCGCAAAGTTGCAGCATCCGTGTCTCGTGACATCATTGAAGGTTACCCTACTCTATTA	2	chrII_124932_T_C;chrII_124959_A_C	35;8	22	0	firstTileUTR	TRUE
firstTileUTR_00188	YBL050W_5UTR_0	YBL050W_5UTR	chrII	125042	+	GGCGCGCCGCCCACTTCTTATCATTACTTCAACTTTACCTTCCCTATACCTGTGTGTCCTTATTAATTCAAGTTAATCCGAGGTAATAGATTAGGGTAACCTTCAATGATGTCACGAAACACGGATGCTGCAACTTTGCGATTTTTTCCTGG	4	chrII_124932_T_C;chrII_124959_A_C;chrII_124966_A_T;chrII_125022_A_G	35;62;69;125	1111	0	firstTileUTR	TRUE
firstTileUTR_00189	YBL050W_5UTR_0	YBL050W_5UTR	chrII	125042	+	GGCGCGCCGCCCACTTCTTATCATTACTTCAACTTTACCTTCCCTATACCTGTGTGTCCTTATTAATTCAAGTTAATCCGAGGTAATAGATTAGGGTAACCTTCAATGATGTCACGAGACACGGATGCTGCAACTTTGCGATTTTTTCCTGG	4	chrII_124932_T_C;chrII_124959_A_C;chrII_124966_A_T;chrII_125022_A_G	35;62;69;125	2111	0	firstTileUTR	TRUE
firstTileUTR_00190	YBL050W_5UTR_0	YBL050W_5UTR	chrII	125042	+	GGCGCGCCGCCCACTTCTTATCATTACTTCAACTTTACCTTCCCTATACCTGTGTGTCCTTATTAATTCAAGTTAATCCGAGGTAATAGAGTAGGGTAACCTTCAATGATGTCACGAAACACGGATGCTGCAACTTTGCGATTTTTTCCTGG	4	chrII_124932_T_C;chrII_124959_A_C;chrII_124966_A_T;chrII_125022_A_G	35;62;69;125	1211	0	firstTileUTR	TRUE
firstTileUTR_00191	YBL050W_5UTR_0	YBL050W_5UTR	chrII	125042	+	GGCGCGCCGCCCACTTCTTATCATTACTTCAACTTTACCTTCCCTATACCTGTGTGTCCTTATTAATTCAAGTTAATCCGAGGAAATAGATTAGGGTAACCTTCAATGATGTCACGAAACACGGATGCTGCAACTTTGCGATTTTTTCCTGG	4	chrII_124932_T_C;chrII_124959_A_C;chrII_124966_A_T;chrII_125022_A_G	35;62;69;125	1121	0	firstTileUTR	TRUE
firstTileUTR_00192	YBL050W_5UTR_0	YBL050W_5UTR	chrII	125042	+	GGCGCGCCGCCCACTTCTTATCATTACCTCAACTTTACCTTCCCTATACCTGTGTGTCCTTATTAATTCAAGTTAATCCGAGGTAATAGATTAGGGTAACCTTCAATGATGTCACGAAACACGGATGCTGCAACTTTGCGATTTTTTCCTGG	4	chrII_124932_T_C;chrII_124959_A_C;chrII_124966_A_T;chrII_125022_A_G	35;62;69;125	1112	0	firstTileUTR	TRUE
firstTileUTR_00193	YBL050W_5UTR_0	YBL050W_5UTR	chrII	125042	+	GGCGCGCCGCCCACTTCTTATCATTACCTCAACTTTACCTTCCCTATACCTGTGTGTCCTTATTAATTCAAGTTAATCCGAGGAAATAGAGTAGGGTAACCTTCAATGATGTCACGAGACACGGATGCTGCAACTTTGCGATTTTTTCCTGG	4	chrII_124932_T_C;chrII_124959_A_C;chrII_124966_A_T;chrII_125022_A_G	35;62;69;125	2222	0	firstTileUTR	TRUE
firstTileUTR_00194	YBL047C_5UTR_0	YBL047C_5UTR	chrII	132201	-	GGCGCGCCGCTCTGTTGTGTGTTGTTTTCAATGTGCTTCTGAAAAGGGGTTTGTAATAGTTGAAGATTTTGATTATAGGAGAAATCTAATCCCCCTCCGAAGCGCCGACGGGTAATGATTGTGTAGTTTTTCATTTCGCGATCAAAAGCATG	1	chrII_132280_T_C	66	1	0	firstTileUTR	TRUE
firstTileUTR_00195	YBL047C_5UTR_0	YBL047C_5UTR	chrII	132201	-	GGCGCGCCGCTCTGTTGTGTGTTGTTTTCAATGTGCTTCTGAAAAGGGGTTTGTAATAGTTGAAGATTTTGATTATAGGAGAAATCCAATCCCCCTCCGAAGCGCCGACGGGTAATGATTGTGTAGTTTTTCATTTCGCGATCAAAAGCATG	1	chrII_132280_T_C	66	2	0	firstTileUTR	TRUE
firstTileUTR_00196	YBL045C_5UTR_0	YBL045C_5UTR	chrII	135702	-	GGCGCGCCGTTTTCCTCGAATAAGACGGGGAAAGAGAGTAGGGGAATATCGGTTAGGGAGCGCTGTAGGCCTTTAATTTTCTTGTTTGGTTTTTATTTGGTGCAGCTGACAGCGCGGGCCCTTGAACTTCTGGAGGACAAAAAACACTGTTA	1	chrII_135827_G_A	20	1	0	firstTileUTR	TRUE
firstTileUTR_00197	YBL045C_5UTR_0	YBL045C_5UTR	chrII	135702	-	GGCGCGCCGTTTTCCTCGAATAAGACGGGGAAAGAGAGTAGGGGAATATCGGTTAGGGAGCGCTGTAGGCCTTTAATTTTCTTGTTTGGTTTTTATTTGGTGCAGCTGACAGCGCGGGCCCTTGAACTTCTGAAGGACAAAAAACACTGTTA	1	chrII_135827_G_A	20	2	0	firstTileUTR	TRUE
firstTileUTR_00198	YBL042C_5UTR_0	YBL042C_5UTR	chrII	140316	-	GGCGCGCCAATGTGCTGCAAAGTAAAGCAAAGCTGTCCAATACTATGTTTTAAATTTTACAAGAAGGTCGAAGCAATACTACTGTTATATAAAAGATAGGATAGCATGTCATCGAGTAATTGAGCAAGAGAGGAAATGAAAAACTTTTCCGT	1	chrII_140383_A_G	78	1	0	firstTileUTR	FALSE
firstTileUTR_00199	YBL042C_5UTR_0	YBL042C_5UTR	chrII	140316	-	GGCGCGCCAATGTGCTGCAAAGTAAAGCAAAGCTGTCCAATACTATGTTTTAAATTTTACAAGAAGGTCGAAGCGATACTACTGTTATATAAAAGATAGGATAGCATGTCATCGAGTAATTGAGCAAGAGAGGAAATGAAAAACTTTTCCGT	1	chrII_140383_A_G	78	2	0	firstTileUTR	FALSE
firstTileUTR_00200	YBL041W_5UTR_0	YBL041W_5UTR	chrII	141212	+	GGCGCGCCACTCTCTTTCCAACTCAGTTCACCTTGTATTATACCGCTTGTTTTTGCCACCCTTTGAGTTTCCTCGATCCTTTAAGTTGGAAAAGATAAAAACAATTATCGCTCCGTACGAACACCAAATCTCTGCGACGCAGAGACGGCAAT	3	chrII_141175_C_T;chrII_141191_G_A;chrII_141207_A_G	108;124;140	111	0	firstTileUTR	TRUE
firstTileUTR_00201	YBL041W_5UTR_0	YBL041W_5UTR	chrII	141212	+	GGCGCGCCACTCTCTTTCCAACTCAGTTCACCTTGTATTATACCACTTGTTTTTGCCACCCTTTGAGTTTCCTCGATCCTTTAAGTTGGAAAAGATAAAAACAATTATCGCTCCGTACGAACACCAAATCTCTGCGACGCAGAGACGGCAAT	3	chrII_141175_C_T;chrII_141191_G_A;chrII_141207_A_G	108;124;140	211	0	firstTileUTR	TRUE
firstTileUTR_00202	YBL041W_5UTR_0	YBL041W_5UTR	chrII	141212	+	GGCGCGCCACTCTCTTTCCAACTCAGTTTACCTTGTATTATACCGCTTGTTTTTGCCACCCTTTGAGTTTCCTCGATCCTTTAAGTTGGAAAAGATAAAAACAATTATCGCTCCGTACGAACACCAAATCTCTGCGACGCAGAGACGGCAAT	3	chrII_141175_C_T;chrII_141191_G_A;chrII_141207_A_G	108;124;140	121	0	firstTileUTR	TRUE
firstTileUTR_00203	YBL041W_5UTR_0	YBL041W_5UTR	chrII	141212	+	GGCGCGCCACTCCCTTTCCAACTCAGTTCACCTTGTATTATACCGCTTGTTTTTGCCACCCTTTGAGTTTCCTCGATCCTTTAAGTTGGAAAAGATAAAAACAATTATCGCTCCGTACGAACACCAAATCTCTGCGACGCAGAGACGGCAAT	3	chrII_141175_C_T;chrII_141191_G_A;chrII_141207_A_G	108;124;140	112	0	firstTileUTR	TRUE
firstTileUTR_00204	YBL041W_5UTR_0	YBL041W_5UTR	chrII	141212	+	GGCGCGCCACTCCCTTTCCAACTCAGTTTACCTTGTATTATACCACTTGTTTTTGCCACCCTTTGAGTTTCCTCGATCCTTTAAGTTGGAAAAGATAAAAACAATTATCGCTCCGTACGAACACCAAATCTCTGCGACGCAGAGACGGCAAT	3	chrII_141175_C_T;chrII_141191_G_A;chrII_141207_A_G	108;124;140	222	0	firstTileUTR	TRUE
firstTileUTR_00205	YBL040C_5UTR_0	YBL040C_5UTR	chrII	142911	-	GGCGCGCCGAACAAGTGCCCTCAGCAAATTCATCTGCCTCGAAATTTGAACTTATTTTTAACGTGTTCAATATTTAGCTAAAACGTCGTTTTCAGTCCGGGTACCGCAGATAAGCCATCCCGGATCTTTAAAGGAAAACGAGGAATTCAGTG	1	chrII_142980_G_A	76	1	0	firstTileUTR	FALSE
firstTileUTR_00206	YBL040C_5UTR_0	YBL040C_5UTR	chrII	142911	-	GGCGCGCCGAACAAGTGCCCTCAGCAAATTCATCTGCCTCGAAATTTGAACTTATTTTTAACGTGTTCAATATTTAACTAAAACGTCGTTTTCAGTCCGGGTACCGCAGATAAGCCATCCCGGATCTTTAAAGGAAAACGAGGAATTCAGTG	1	chrII_142980_G_A	76	2	0	firstTileUTR	FALSE
firstTileUTR_00207	YBL038W_5UTR_0	YBL038W_5UTR	chrII	146124	+	GGCGCGCCGCTCTACAAGTGGACTGTTAATTGGTAATAATTTCTTCCAAAGAAGTCTTCTTGTTATTTGAGCACCAATATGATATTATTATTTCCACCAGCATTCTTTCGTAATTAGTGATTCAACTGGATACAAAGCCTAGGGTTCTGTTC	4	chrII_146099_C_T;chrII_146107_C_A;chrII_146113_A_T;chrII_146114_C_T	120;128;134;135	1111	0	firstTileUTR	TRUE
firstTileUTR_00208	YBL038W_5UTR_0	YBL038W_5UTR	chrII	146124	+	GGCGCGCCGCTCTACAAGTGGACTGTTAATTGATAATAATTTCTTCCAAAGAAGTCTTCTTGTTATTTGAGCACCAATATGATATTATTATTTCCACCAGCATTCTTTCGTAATTAGTGATTCAACTGGATACAAAGCCTAGGGTTCTGTTC	4	chrII_146099_C_T;chrII_146107_C_A;chrII_146113_A_T;chrII_146114_C_T	120;128;134;135	2111	0	firstTileUTR	TRUE
firstTileUTR_00209	YBL038W_5UTR_0	YBL038W_5UTR	chrII	146124	+	GGCGCGCCGCTCTACAAGTGGACTTTTAATTGGTAATAATTTCTTCCAAAGAAGTCTTCTTGTTATTTGAGCACCAATATGATATTATTATTTCCACCAGCATTCTTTCGTAATTAGTGATTCAACTGGATACAAAGCCTAGGGTTCTGTTC	4	chrII_146099_C_T;chrII_146107_C_A;chrII_146113_A_T;chrII_146114_C_T	120;128;134;135	1211	0	firstTileUTR	TRUE
firstTileUTR_00210	YBL038W_5UTR_0	YBL038W_5UTR	chrII	146124	+	GGCGCGCCGCTCTACAAGAGGACTGTTAATTGGTAATAATTTCTTCCAAAGAAGTCTTCTTGTTATTTGAGCACCAATATGATATTATTATTTCCACCAGCATTCTTTCGTAATTAGTGATTCAACTGGATACAAAGCCTAGGGTTCTGTTC	4	chrII_146099_C_T;chrII_146107_C_A;chrII_146113_A_T;chrII_146114_C_T	120;128;134;135	1121	0	firstTileUTR	TRUE
firstTileUTR_00211	YBL038W_5UTR_0	YBL038W_5UTR	chrII	146124	+	GGCGCGCCGCTCTACAAATGGACTGTTAATTGGTAATAATTTCTTCCAAAGAAGTCTTCTTGTTATTTGAGCACCAATATGATATTATTATTTCCACCAGCATTCTTTCGTAATTAGTGATTCAACTGGATACAAAGCCTAGGGTTCTGTTC	4	chrII_146099_C_T;chrII_146107_C_A;chrII_146113_A_T;chrII_146114_C_T	120;128;134;135	1112	0	firstTileUTR	TRUE
firstTileUTR_00212	YBL038W_5UTR_0	YBL038W_5UTR	chrII	146124	+	GGCGCGCCGCTCTACAAAAGGACTTTTAATTGATAATAATTTCTTCCAAAGAAGTCTTCTTGTTATTTGAGCACCAATATGATATTATTATTTCCACCAGCATTCTTTCGTAATTAGTGATTCAACTGGATACAAAGCCTAGGGTTCTGTTC	4	chrII_146099_C_T;chrII_146107_C_A;chrII_146113_A_T;chrII_146114_C_T	120;128;134;135	2222	0	firstTileUTR	TRUE
firstTileUTR_00213	YBL037W_5UTR_0	YBL037W_5UTR	chrII	147111	+	GGCGCGCCAAATATTTCTCAGTGTTTATACCTCAGCTGGATCAAACAAGTGTTTTTTCACGTCGTCATGTGTTTCTTCAGCGCTCACTCCGGGGAAAAACTCCTATTCTTCCGCAGAGAGTATACAGTGCATACTAGAATTAATAAACTCAT	1	chrII_146992_C_T	26	1	0	firstTileUTR	TRUE
firstTileUTR_00214	YBL037W_5UTR_0	YBL037W_5UTR	chrII	147111	+	GGCGCGCCAAATATTTCTCAGTGTTTATACCTCAGCTGGATCAAACAAGTGTTTTTTCACGTCGTCATGTGTTTCTTCAGCGCTCACTCCGGGGAAAAACTCCTATTCTTCCGCAGAGAGTATACAATGCATACTAGAATTAATAAACTCAT	1	chrII_146992_C_T	26	2	0	firstTileUTR	TRUE
firstTileUTR_00215	YBL036C_5UTR_0	YBL036C_5UTR	chrII	151233	-	GGCGCGCCGCTGGAATCTTAGTCAAAAAGGAAAGAGTGATGCCTATCAGTTTTTTTTTTTATTATGCATTTAAGAGTAGTCTCTACTTATGAACATTTTCTCTGGCCTCTGATCACGTTACTTTATTACCCGGATACTGATCATGTTATGGT	1	chrII_151274_GT_GTT	104	1	0	firstTileUTR	TRUE
firstTileUTR_00216	YBL036C_5UTR_0	YBL036C_5UTR	chrII	151233	-	GGCGCGCCGCTGGAATCTTAGTCAAAAAGGAAAGAGTGATGCCTATCAGTTTTTTTTTTTTATTATGCATTTAAGAGTAGTCTCTACTTATGAACATTTTCTCTGGCCTCTGATCACGTTACTTTATTACCCGGATACTGATCATGTTATGGT	1	chrII_151274_GT_GTT	104	2	0	firstTileUTR	TRUE
firstTileUTR_00217	YBL035C_5UTR_0	YBL035C_5UTR	chrII	153691	-	GGCGCGCCATTTTTATATGCAAATATATTATGTATATGAAACAAAATGTTATATGTGTCTACAAAGAGCTCATATTATTACAGTTTTAGAAAAGAGAAAGAACTAAGAAACTCTGGTGAGACGCGTCACGGTAAAAAAAAATTACGCGTCTA	2	chrII_153787_T_A;chrII_153815_TA_T	49;21	11	0	firstTileUTR	FALSE
firstTileUTR_00218	YBL035C_5UTR_0	YBL035C_5UTR	chrII	153691	-	GGCGCGCCATTTTTATATGCAAATATATTATGTATATGAAACAAAATGTTATATGTGTCTACAAAGAGCTCATATTATTACAGTTTTAGAAAAGAGAAAGAACAAAGAAACTCTGGTGAGACGCGTCACGGTAAAAAAAAATTACGCGTCTA	2	chrII_153787_T_A;chrII_153815_TA_T	49;21	21	0	firstTileUTR	FALSE
firstTileUTR_00219	YBL035C_5UTR_0	YBL035C_5UTR	chrII	153691	-	GGCGCGCCATTTTTATATGCAAATATATTATGTATATGAAACAAAATGTTATATGTGTCTACAAAGAGCTCATATTATTACAGTTTTAGAAAAGAGAAAGAACTAAGAAACTCTGGTGAGACGCGTCACGGTAAAAAAAATTACGCGTCTA	2	chrII_153787_T_A;chrII_153815_TA_T	49;21	12	0	firstTileUTR	FALSE
firstTileUTR_00220	YBL035C_5UTR_0	YBL035C_5UTR	chrII	153691	-	GGCGCGCCATTTTTATATGCAAATATATTATGTATATGAAACAAAATGTTATATGTGTCTACAAAGAGCTCATATTATTACAGTTTTAGAAAAGAGAAAGAACAAAGAAACTCTGGTGAGACGCGTCACGGTAAAAAAAATTACGCGTCTA	2	chrII_153787_T_A;chrII_153815_TA_T	49;21	22	0	firstTileUTR	FALSE
firstTileUTR_00221	YBL033C_5UTR_0	YBL033C_5UTR	chrII	159721	-	GGCGCGCCGCCACTTTTTGTAATGACTCAATTATTGTCCACGCCAGCACAGCAACTTCTTTATATATACTATAGCGGCGCTGGCGCTCACCCCACAAGAGCGTCCGACTAATTTCTGACAAATCGTAAAAAGAAAAAGAAAAACTCAAAGGA	2	chrII_159797_C_T;chrII_159857_C_G	69;9	11	0	firstTileUTR	FALSE
firstTileUTR_00222	YBL033C_5UTR_0	YBL033C_5UTR	chrII	159721	-	GGCGCGCCGCCACTTTTTGTAATGACTCAATTATTGTCCACGCCAGCACAGCAACTTCTTTATATATACTATAGCGGCGCTGGTGCTCACCCCACAAGAGCGTCCGACTAATTTCTGACAAATCGTAAAAAGAAAAAGAAAAACTCAAAGGA	2	chrII_159797_C_T;chrII_159857_C_G	69;9	21	0	firstTileUTR	FALSE
firstTileUTR_00223	YBL033C_5UTR_0	YBL033C_5UTR	chrII	159721	-	GGCGCGCCGCCACTTTTTGTAATGACTCAATTATTGTCCACGCCAGCACAGCAACTTCTTTATATATACTATAGCGGCGCTGGCGCTCACCCCACAAGAGCGTCCGACTAATTTCTGACAAATCGTAAAAAGAAAAAGAAAAAGTCAAAGGA	2	chrII_159797_C_T;chrII_159857_C_G	69;9	12	0	firstTileUTR	FALSE
firstTileUTR_00224	YBL033C_5UTR_0	YBL033C_5UTR	chrII	159721	-	GGCGCGCCGCCACTTTTTGTAATGACTCAATTATTGTCCACGCCAGCACAGCAACTTCTTTATATATACTATAGCGGCGCTGGTGCTCACCCCACAAGAGCGTCCGACTAATTTCTGACAAATCGTAAAAAGAAAAAGAAAAAGTCAAAGGA	2	chrII_159797_C_T;chrII_159857_C_G	69;9	22	0	firstTileUTR	FALSE
firstTileUTR_00225	YBL029C-A_5UTR_0	YBL029C-A_5UTR	chrII	164841	-	GGCGCGCCGCTGACATTTATTCCCAACTTGTTCTTCAGCCGCTTGTTTTATAACGTACATTATTGTAAAAACGGAGTAGAAAGGGAAAAAGGGAAAGGGATGGACGTGGCTAATGCGCATCTTCGTTTGTGTGTATATCCTTTGATCTTCAC	1	chrII_164914_A_G	72	1	0	firstTileUTR	TRUE
firstTileUTR_00226	YBL029C-A_5UTR_0	YBL029C-A_5UTR	chrII	164841	-	GGCGCGCCGCTGACATTTATTCCCAACTTGTTCTTCAGCCGCTTGTTTTATAACGTACATTATTGTAAAAACGGAGTAGAGAGGGAAAAAGGGAAAGGGATGGACGTGGCTAATGCGCATCTTCGTTTGTGTGTATATCCTTTGATCTTCAC	1	chrII_164914_A_G	72	2	0	firstTileUTR	TRUE
firstTileUTR_00227	YBL028C_5UTR_0	YBL028C_5UTR	chrII	167885	-	GGCGCGCCGGTTTGTCATCAGTGTCAATATATCAGAATGTTTTACTAATACCTAGTACGAAAATTTTTCGTAGAGCCTCATCGCTCTGTCTCTCGCTATCCAAAAAAAAAAAAAAAAGTGGAACTGGATGAATATTGCGTATAAGGACAGTG	4	chrII_167897_A_G;chrII_167978_C_CA,CAAA;chrII_167998_G_A;chrII_168012_T_A	133;52;32;18	1111	0	firstTileUTR	FALSE
firstTileUTR_00228	YBL028C_5UTR_0	YBL028C_5UTR	chrII	167885	-	GGCGCGCCGGTTTGTCATCGGTGTCAATATATCAGAATGTTTTACTAATACCTAGTACGAAAATTTTTCGTAGAGCCTCATCGCTCTGTCTCTCGCTATCCAAAAAAAAAAAAAAAAGTGGAACTGGATGAATATTGCGTATAAGGACAGTG	4	chrII_167897_A_G;chrII_167978_C_CA,CAAA;chrII_167998_G_A;chrII_168012_T_A	133;52;32;18	2111	0	firstTileUTR	FALSE
firstTileUTR_00229	YBL028C_5UTR_0	YBL028C_5UTR	chrII	167885	-	GGCGCGCCGGTTTGTCATCAGTGTCAATATATCAGAATGTTTTACTAATACCTAGTACGAAAATTTTTCGTAGAGCCTCATCGCTCTGTCTCTCGCTATCCAAAAAAAAAAAAAAAAAGTGGAACTGGATGAATATTGCGTATAAGGACAGTG	4	chrII_167897_A_G;chrII_167978_C_CA,CAAA;chrII_167998_G_A;chrII_168012_T_A	133;52;32;18	1211	0	firstTileUTR	FALSE
firstTileUTR_00230	YBL028C_5UTR_0	YBL028C_5UTR	chrII	167885	-	GGCGCGCCGGTTTGTCATCAGTGTCAATATATCAGAATGTTTTACTAATACCTAGTACGAAAATTTTTCGTAGAGCCTCATCGCTCTGTCTCTCGCTATCCAAAAAAAAAAAAAAAAGTGAAACTGGATGAATATTGCGTATAAGGACAGTG	4	chrII_167897_A_G;chrII_167978_C_CA,CAAA;chrII_167998_G_A;chrII_168012_T_A	133;52;32;18	1121	0	firstTileUTR	FALSE
firstTileUTR_00231	YBL028C_5UTR_0	YBL028C_5UTR	chrII	167885	-	GGCGCGCCGGTTTGTCATCAGTGTCAATATATCAGAATGTTTTACTAATACCTAGTACGAAAATTTTTCGTAGAGCCTCATCGCTCTGTCTCTCGCTATCCAAAAAAAAAAAAAAAAGTGGAACTGGATGAATAATGCGTATAAGGACAGTG	4	chrII_167897_A_G;chrII_167978_C_CA,CAAA;chrII_167998_G_A;chrII_168012_T_A	133;52;32;18	1112	0	firstTileUTR	FALSE
firstTileUTR_00232	YBL028C_5UTR_0	YBL028C_5UTR	chrII	167885	-	GGCGCGCCGGTTTGTCATCGGTGTCAATATATCAGAATGTTTTACTAATACCTAGTACGAAAATTTTTCGTAGAGCCTCATCGCTCTGTCTCTCGCTATCCAAAAAAAAAAAAAAAAAGTGAAACTGGATGAATAATGCGTATAAGGACAGTG	4	chrII_167897_A_G;chrII_167978_C_CA,CAAA;chrII_167998_G_A;chrII_168012_T_A	133;52;32;18	2222	0	firstTileUTR	FALSE
firstTileUTR_00233	YBL026W_5UTR_0	YBL026W_5UTR	chrII	170552	+	GGCGCGCCGTTTTCCTTATATGCCGTACTATAATTAAAGTTGCTCTGTTTTCGGTTTTATTTTTTTTGGTTCAAAACTTCCTCATTGCCTGGATTTGAAAAATGAACAACGACAATGATACAATTACAACAGCGGAAAAAAGTTTCCCGTAC	1	chrII_170442_T_C	35	1	0	firstTileUTR	TRUE
firstTileUTR_00234	YBL026W_5UTR_0	YBL026W_5UTR	chrII	170552	+	GGCGCGCCGTTTTCCTTATATGCCGTACTATAATTAAAGTTGCTCTGTTTTCGGTTTTATTTTTTTTGGTTCAAAACTTCCTCATTGCCTGGATTTGAAAAATGAACAACGACAATGGTACAATTACAACAGCGGAAAAAAGTTTCCCGTAC	1	chrII_170442_T_C	35	2	0	firstTileUTR	TRUE
firstTileUTR_00235	YBL024W_5UTR_0	YBL024W_5UTR	chrII	172511	+	GGCGCGCCACAGTGTAGATAAAAGGAAGTGTTAGAACTAGTATAAGTAATATGTTTTTAACTATAGTAGGTGATTTGACGTCTTTGGAAGAACTCAGCGCTAAATTTTTCAAAGTGAAAAAAAGCTACAGAAGAGGACAAAAAAAAAGTACG	1	chrII_172488_A_G	122	1	0	firstTileUTR	FALSE
firstTileUTR_00236	YBL024W_5UTR_0	YBL024W_5UTR	chrII	172511	+	GGCGCGCCACAGTGTAGATAAAAGGAAGTGCTAGAACTAGTATAAGTAATATGTTTTTAACTATAGTAGGTGATTTGACGTCTTTGGAAGAACTCAGCGCTAAATTTTTCAAAGTGAAAAAAAGCTACAGAAGAGGACAAAAAAAAAGTACG	1	chrII_172488_A_G	122	2	0	firstTileUTR	FALSE
firstTileUTR_00237	YBL023C_5UTR_0	YBL023C_5UTR	chrII	177579	-	GGCGCGCCGGAGTATTATTAAGTAAACTGTACCAAAATGTGTAGATTATAGGATATTCACCATTTACTTTCTGGTTTCGTTTCTCGAAATTTTTCGTTGTCCTATTTTCTTCGGTAAGTAATTAGATTTCCTAAAAAAGGCATATGATAAAT	1	chrII_177622_G_A	102	1	0	firstTileUTR	TRUE
firstTileUTR_00238	YBL023C_5UTR_0	YBL023C_5UTR	chrII	177579	-	GGCGCGCCGGAGTATTATTAAGTAAACTGTACCAAAATGTGTAGATTATAAGATATTCACCATTTACTTTCTGGTTTCGTTTCTCGAAATTTTTCGTTGTCCTATTTTCTTCGGTAAGTAATTAGATTTCCTAAAAAAGGCATATGATAAAT	1	chrII_177622_G_A	102	2	0	firstTileUTR	TRUE
firstTileUTR_00239	YBL022C_5UTR_0	YBL022C_5UTR	chrII	181402	-	GGCGCGCCGTCGTTGCTGCAATACCAATGCAAAAGCATGGCTAAAAGACTTCGTCTGACTTATTTCCTTCCGGTGGCAAACATCATACACCCTTTACAAAGCACCCATACATTACATTGAATACATTACACACTAACAATAAAATATTATCT	1	chrII_181425_A_C	122	1	0	firstTileUTR	FALSE
firstTileUTR_00240	YBL022C_5UTR_0	YBL022C_5UTR	chrII	181402	-	GGCGCGCCGTCGTTGCTGCAATACCAATGCCAAAGCATGGCTAAAAGACTTCGTCTGACTTATTTCCTTCCGGTGGCAAACATCATACACCCTTTACAAAGCACCCATACATTACATTGAATACATTACACACTAACAATAAAATATTATCT	1	chrII_181425_A_C	122	2	0	firstTileUTR	FALSE
firstTileUTR_00241	YBL021C_5UTR_0	YBL021C_5UTR	chrII	182118	-	GGCGCGCCGTGTTACTATCTAGCTTAGTCCTGCTCTTGAGTTTGATTGGCGGAAAGCTACTATTCGCAGCTCTTTTTTTACTTAGTCTGAAAGAGCGGACCAAAAAACGCACGTAGCGCGATATTGTCGTGGCATCGAACGTAATATGGTAC	2	chrII_182128_T_C;chrII_182137_G_T	135;126	11	0	firstTileUTR	TRUE
firstTileUTR_00242	YBL021C_5UTR_0	YBL021C_5UTR	chrII	182118	-	GGCGCGCCGTGTTACTACCTAGCTTAGTCCTGCTCTTGAGTTTGATTGGCGGAAAGCTACTATTCGCAGCTCTTTTTTTACTTAGTCTGAAAGAGCGGACCAAAAAACGCACGTAGCGCGATATTGTCGTGGCATCGAACGTAATATGGTAC	2	chrII_182128_T_C;chrII_182137_G_T	135;126	21	0	firstTileUTR	TRUE
firstTileUTR_00243	YBL021C_5UTR_0	YBL021C_5UTR	chrII	182118	-	GGCGCGCCGTGTTACTATCTAGCTTATTCCTGCTCTTGAGTTTGATTGGCGGAAAGCTACTATTCGCAGCTCTTTTTTTACTTAGTCTGAAAGAGCGGACCAAAAAACGCACGTAGCGCGATATTGTCGTGGCATCGAACGTAATATGGTAC	2	chrII_182128_T_C;chrII_182137_G_T	135;126	12	0	firstTileUTR	TRUE
firstTileUTR_00244	YBL021C_5UTR_0	YBL021C_5UTR	chrII	182118	-	GGCGCGCCGTGTTACTACCTAGCTTATTCCTGCTCTTGAGTTTGATTGGCGGAAAGCTACTATTCGCAGCTCTTTTTTTACTTAGTCTGAAAGAGCGGACCAAAAAACGCACGTAGCGCGATATTGTCGTGGCATCGAACGTAATATGGTAC	2	chrII_182128_T_C;chrII_182137_G_T	135;126	22	0	firstTileUTR	TRUE
firstTileUTR_00245	YBL018C_5UTR_0	YBL018C_5UTR	chrII	186515	-	GGCGCGCCATTCTGATTATCCTATAAAGCTGAACAGTAAAGCTTGTAAAATTACGCGATGACTTATGTATTGAAGTTATGACGTTCTCGATGATCTTCAGTCAAACAACCACTTTCCCGTAACATATGATATATCCCACCCGCTTCCTTGTA	3	chrII_186525_A_G;chrII_186623_C_T;chrII_186648_C_G	135;37;12	111	0	firstTileUTR	TRUE
firstTileUTR_00246	YBL018C_5UTR_0	YBL018C_5UTR	chrII	186515	-	GGCGCGCCATTCTGATTGTCCTATAAAGCTGAACAGTAAAGCTTGTAAAATTACGCGATGACTTATGTATTGAAGTTATGACGTTCTCGATGATCTTCAGTCAAACAACCACTTTCCCGTAACATATGATATATCCCACCCGCTTCCTTGTA	3	chrII_186525_A_G;chrII_186623_C_T;chrII_186648_C_G	135;37;12	211	0	firstTileUTR	TRUE
firstTileUTR_00247	YBL018C_5UTR_0	YBL018C_5UTR	chrII	186515	-	GGCGCGCCATTCTGATTATCCTATAAAGCTGAACAGTAAAGCTTGTAAAATTACGCGATGACTTATGTATTGAAGTTATGACGTTCTCGATGATCTTCAGTCAAACAACCACTTTTCCGTAACATATGATATATCCCACCCGCTTCCTTGTA	3	chrII_186525_A_G;chrII_186623_C_T;chrII_186648_C_G	135;37;12	121	0	firstTileUTR	TRUE
firstTileUTR_00248	YBL018C_5UTR_0	YBL018C_5UTR	chrII	186515	-	GGCGCGCCATTCTGATTATCCTATAAAGCTGAACAGTAAAGCTTGTAAAATTACGCGATGACTTATGTATTGAAGTTATGACGTTCTCGATGATCTTCAGTCAAACAACCACTTTCCCGTAACATATGATATATCCCACCGGCTTCCTTGTA	3	chrII_186525_A_G;chrII_186623_C_T;chrII_186648_C_G	135;37;12	112	0	firstTileUTR	TRUE
firstTileUTR_00249	YBL018C_5UTR_0	YBL018C_5UTR	chrII	186515	-	GGCGCGCCATTCTGATTGTCCTATAAAGCTGAACAGTAAAGCTTGTAAAATTACGCGATGACTTATGTATTGAAGTTATGACGTTCTCGATGATCTTCAGTCAAACAACCACTTTTCCGTAACATATGATATATCCCACCGGCTTCCTTGTA	3	chrII_186525_A_G;chrII_186623_C_T;chrII_186648_C_G	135;37;12	222	0	firstTileUTR	TRUE
firstTileUTR_00250	YBL014C_5UTR_0	YBL014C_5UTR	chrII	201777	-	GGCGCGCCACTTCAACTTGCCACATCAATATCATTACCAAACTAATATGAAAGCTCATCTCGGTTTCTTAATCGAGAGAATAAAAATTATCGTATGCCCACAGGGTAACCCATATTTATATCAAATGGAAGAAGCGTCCATTAAGAAAAAAG	3	chrII_201782_C_T;chrII_201831_G_A;chrII_201879_C_T	140;91;43	111	0	firstTileUTR	FALSE
firstTileUTR_00251	YBL014C_5UTR_0	YBL014C_5UTR	chrII	201777	-	GGCGCGCCACTTTAACTTGCCACATCAATATCATTACCAAACTAATATGAAAGCTCATCTCGGTTTCTTAATCGAGAGAATAAAAATTATCGTATGCCCACAGGGTAACCCATATTTATATCAAATGGAAGAAGCGTCCATTAAGAAAAAAG	3	chrII_201782_C_T;chrII_201831_G_A;chrII_201879_C_T	140;91;43	211	0	firstTileUTR	FALSE
firstTileUTR_00252	YBL014C_5UTR_0	YBL014C_5UTR	chrII	201777	-	GGCGCGCCACTTCAACTTGCCACATCAATATCATTACCAAACTAATATGAAAGCTCATCTCAGTTTCTTAATCGAGAGAATAAAAATTATCGTATGCCCACAGGGTAACCCATATTTATATCAAATGGAAGAAGCGTCCATTAAGAAAAAAG	3	chrII_201782_C_T;chrII_201831_G_A;chrII_201879_C_T	140;91;43	121	0	firstTileUTR	FALSE
firstTileUTR_00253	YBL014C_5UTR_0	YBL014C_5UTR	chrII	201777	-	GGCGCGCCACTTCAACTTGCCACATCAATATCATTACCAAACTAATATGAAAGCTCATCTCGGTTTCTTAATCGAGAGAATAAAAATTATCGTATGCCCACAGGGTAACTCATATTTATATCAAATGGAAGAAGCGTCCATTAAGAAAAAAG	3	chrII_201782_C_T;chrII_201831_G_A;chrII_201879_C_T	140;91;43	112	0	firstTileUTR	FALSE
firstTileUTR_00254	YBL014C_5UTR_0	YBL014C_5UTR	chrII	201777	-	GGCGCGCCACTTTAACTTGCCACATCAATATCATTACCAAACTAATATGAAAGCTCATCTCAGTTTCTTAATCGAGAGAATAAAAATTATCGTATGCCCACAGGGTAACTCATATTTATATCAAATGGAAGAAGCGTCCATTAAGAAAAAAG	3	chrII_201782_C_T;chrII_201831_G_A;chrII_201879_C_T	140;91;43	222	0	firstTileUTR	FALSE
firstTileUTR_00255	YBL010C_5UTR_0	YBL010C_5UTR	chrII	206979	-	GGCGCGCCATCTTGCTACACCTTAAATTCTCGTTTGTGATACGCCTAACGTTTTTTTTTTTTTTCAGTTTTGATAGCAATTCGCGAAACTTTTTGTAACATCTTCTCTTCTCGAAAAGCGAAAATAGTAAACAATAACTTAAAGCGTATTGG	1	chrII_207021_GTT_GT	103	1	0	firstTileUTR	TRUE
firstTileUTR_00256	YBL010C_5UTR_0	YBL010C_5UTR	chrII	206979	-	GGCGCGCCATCTTGCTACACCTTAAATTCTCGTTTGTGATACGCCTAACGTTTTTTTTTTTTTCAGTTTTGATAGCAATTCGCGAAACTTTTTGTAACATCTTCTCTTCTCGAAAAGCGAAAATAGTAAACAATAACTTAAAGCGTATTGG	1	chrII_207021_GTT_GT	103	2	0	firstTileUTR	TRUE
firstTileUTR_00257	YBL009W_5UTR_0	YBL009W_5UTR	chrII	207160	+	GGCGCGCCGGTGAAATGATTTTACTACAACTAAATATATTAATACCAATACGCTTTAAGTTATTGTTTACTATTTTCGCTTTTCGAGAAGAGAAGATGTTACAAAAAGTTTCGCGAATTGCTATCAAAACTGAAAAAAAAAAAAAACGTTAG	1	chrII_207021_GTT_GT	6	1	0	firstTileUTR	FALSE
firstTileUTR_00258	YBL009W_5UTR_0	YBL009W_5UTR	chrII	207160	+	GGCGCGCCGGTGAAATGATTTTACTACAACTAAATATATTAATACCAATACGCTTTAAGTTATTGTTTACTATTTTCGCTTTTCGAGAAGAGAAGATGTTACAAAAAGTTTCGCGAATTGCTATCAAAACTGAAAAAAAAAAAAACGTTAG	1	chrII_207021_GTT_GT	6	2	0	firstTileUTR	FALSE
firstTileUTR_00259	YBL007C_5UTR_0	YBL007C_5UTR	chrII	216418	-	GGCGCGCCATCCCTTCTTTTAGGATTGCAATAGATATACATAGTATATATGCGCTAAATATTCGTTCTGTTTTCGTCTGATGTATCTCGATTTCGCATGAGTGGAAGGAAGCCCCTTTTAGGAATCGTATAGTCACTTTCTACGAAGCAACA	2	chrII_216520_A_G;chrII_216541_A_C	43;22	11	0	firstTileUTR	TRUE
firstTileUTR_00260	YBL007C_5UTR_0	YBL007C_5UTR	chrII	216418	-	GGCGCGCCATCCCTTCTTTTAGGATTGCAATAGATATACATAGTATATATGCGCTAAATATTCGTTCTGTTTTCGTCTGATGTATCTCGATTTCGCATGAGTGGAAGGAGGCCCCTTTTAGGAATCGTATAGTCACTTTCTACGAAGCAACA	2	chrII_216520_A_G;chrII_216541_A_C	43;22	21	0	firstTileUTR	TRUE
firstTileUTR_00261	YBL007C_5UTR_0	YBL007C_5UTR	chrII	216418	-	GGCGCGCCATCCCTTCTTTTAGGATTGCAATAGATATACATAGTATATATGCGCTAAATATTCGTTCTGTTTTCGTCTGATGTATCTCGATTTCGCATGAGTGGAAGGAAGCCCCTTTTAGGAATCGTATCGTCACTTTCTACGAAGCAACA	2	chrII_216520_A_G;chrII_216541_A_C	43;22	12	0	firstTileUTR	TRUE
firstTileUTR_00262	YBL007C_5UTR_0	YBL007C_5UTR	chrII	216418	-	GGCGCGCCATCCCTTCTTTTAGGATTGCAATAGATATACATAGTATATATGCGCTAAATATTCGTTCTGTTTTCGTCTGATGTATCTCGATTTCGCATGAGTGGAAGGAGGCCCCTTTTAGGAATCGTATCGTCACTTTCTACGAAGCAACA	2	chrII_216520_A_G;chrII_216541_A_C	43;22	22	0	firstTileUTR	TRUE
firstTileUTR_00263	YBL005W_5UTR_0	YBL005W_5UTR	chrII	217408	+	GGCGCGCCGGTTGCTTTGGAAGGCTCCTGAAGACACAAACACAGGAAATACATAAATACATTAATGAGATTCTATAACAGTATCTACATATTTGCATTCTAAGACTCACTGTGATAGTTCATTTATTATTCCGCGGAAAGTCCGAGCGGCAG	1	chrII_217360_T_A	97	1	0	firstTileUTR	FALSE
firstTileUTR_00264	YBL005W_5UTR_0	YBL005W_5UTR	chrII	217408	+	GGCGCGCCGGTTGCTTTGGAAGGCTCCTGAAGACACAAACACAGGAAATACATAATTACATTAATGAGATTCTATAACAGTATCTACATATTTGCATTCTAAGACTCACTGTGATAGTTCATTTATTATTCCGCGGAAAGTCCGAGCGGCAG	1	chrII_217360_T_A	97	2	0	firstTileUTR	FALSE
firstTileUTR_00265	YBL003C_5UTR_0	YBL003C_5UTR	chrII	235819	-	GGCGCGCCACTTTCCTAATTCTTATGTAAAAAGACAAGAATTTATGATACTATTTAATAACAAAAAACTACCTAAGAAAAGCATCATGCAGTCGAAATTGAAATCGAAAAGTAAAACTTTAACGGAACATGTTTGAAATTCTAAGAAAGCAT	2	chrII_235838_TA_T;chrII_235845_A_G	126;119	11	0	firstTileUTR	FALSE
firstTileUTR_00266	YBL003C_5UTR_0	YBL003C_5UTR	chrII	235819	-	GGCGCGCCACTTTCCTAATTCTTATGTAAAAGACAAGAATTTATGATACTATTTAATAACAAAAAACTACCTAAGAAAAGCATCATGCAGTCGAAATTGAAATCGAAAAGTAAAACTTTAACGGAACATGTTTGAAATTCTAAGAAAGCAT	2	chrII_235838_TA_T;chrII_235845_A_G	126;119	21	0	firstTileUTR	FALSE
firstTileUTR_00267	YBL003C_5UTR_0	YBL003C_5UTR	chrII	235819	-	GGCGCGCCACTTTCCTAATTCTTATGTAAAAAGGCAAGAATTTATGATACTATTTAATAACAAAAAACTACCTAAGAAAAGCATCATGCAGTCGAAATTGAAATCGAAAAGTAAAACTTTAACGGAACATGTTTGAAATTCTAAGAAAGCAT	2	chrII_235838_TA_T;chrII_235845_A_G	126;119	12	0	firstTileUTR	FALSE
firstTileUTR_00268	YBL003C_5UTR_0	YBL003C_5UTR	chrII	235819	-	GGCGCGCCACTTTCCTAATTCTTATGTAAAAGGCAAGAATTTATGATACTATTTAATAACAAAAAACTACCTAAGAAAAGCATCATGCAGTCGAAATTGAAATCGAAAAGTAAAACTTTAACGGAACATGTTTGAAATTCTAAGAAAGCAT	2	chrII_235838_TA_T;chrII_235845_A_G	126;119	22	0	firstTileUTR	FALSE
firstTileUTR_00269	YBL002W_5UTR_0	YBL002W_5UTR	chrII	236469	+	GGCGCGCCGGTTTGAGTATAGAGCAATCAGAAAAAATTAACAAGAAGAAAGTAAAATTTTTAAAAAGCTAAATAAATAAACAAAACCAGTCAGCAAAAAAATTTTACACATATACCATGATATATAATAATATATTTAAAAACCTGTGTTAT	5	chrII_236383_G_A;chrII_236390_G_A;chrII_236391_G_A;chrII_236427_TTTC_T;chrII_236441_T_A	59;66;67;103;117	11111	0	firstTileUTR	FALSE
firstTileUTR_00270	YBL002W_5UTR_0	YBL002W_5UTR	chrII	236469	+	GGCGCGCCGGTTTGAGTATAGAGCAATCAGAAAAAATTAACAAGAAGAAAGTAAAATTTTTAAAAAGCTAAATAAATAAACAAAACCAGTCAGTAAAAAAATTTTACACATATACCATGATATATAATAATATATTTAAAAACCTGTGTTAT	5	chrII_236383_G_A;chrII_236390_G_A;chrII_236391_G_A;chrII_236427_TTTC_T;chrII_236441_T_A	59;66;67;103;117	21111	0	firstTileUTR	FALSE
firstTileUTR_00271	YBL002W_5UTR_0	YBL002W_5UTR	chrII	236469	+	GGCGCGCCGGTTTGAGTATAGAGCAATCAGAAAAAATTAACAAGAAGAAAGTAAAATTTTTAAAAAGCTAAATAAATAAACAAAACTAGTCAGCAAAAAAATTTTACACATATACCATGATATATAATAATATATTTAAAAACCTGTGTTAT	5	chrII_236383_G_A;chrII_236390_G_A;chrII_236391_G_A;chrII_236427_TTTC_T;chrII_236441_T_A	59;66;67;103;117	12111	0	firstTileUTR	FALSE
firstTileUTR_00272	YBL002W_5UTR_0	YBL002W_5UTR	chrII	236469	+	GGCGCGCCGGTTTGAGTATAGAGCAATCAGAAAAAATTAACAAGAAGAAAGTAAAATTTTTAAAAAGCTAAATAAATAAACAAAATCAGTCAGCAAAAAAATTTTACACATATACCATGATATATAATAATATATTTAAAAACCTGTGTTAT	5	chrII_236383_G_A;chrII_236390_G_A;chrII_236391_G_A;chrII_236427_TTTC_T;chrII_236441_T_A	59;66;67;103;117	11211	0	firstTileUTR	FALSE
firstTileUTR_00273	YBL002W_5UTR_0	YBL002W_5UTR	chrII	236469	+	GGCGCGCCGGTTTGAGTATAGAGCAATCAGAAAAAATTAACAAGAAAGTAAAATTTTTAAAAAGCTAAATAAATAAACAAAACCAGTCAGCAAAAAAATTTTACACATATACCATGATATATAATAATATATTTAAAAACCTGTGTTAT	5	chrII_236383_G_A;chrII_236390_G_A;chrII_236391_G_A;chrII_236427_TTTC_T;chrII_236441_T_A	59;66;67;103;117	11121	0	firstTileUTR	FALSE
firstTileUTR_00274	YBL002W_5UTR_0	YBL002W_5UTR	chrII	236469	+	GGCGCGCCGGTTTGAGTATAGAGCAATCAGAAAAATTTAACAAGAAGAAAGTAAAATTTTTAAAAAGCTAAATAAATAAACAAAACCAGTCAGCAAAAAAATTTTACACATATACCATGATATATAATAATATATTTAAAAACCTGTGTTAT	5	chrII_236383_G_A;chrII_236390_G_A;chrII_236391_G_A;chrII_236427_TTTC_T;chrII_236441_T_A	59;66;67;103;117	11112	0	firstTileUTR	FALSE
firstTileUTR_00275	YBL002W_5UTR_0	YBL002W_5UTR	chrII	236469	+	GGCGCGCCGGTTTGAGTATAGAGCAATCAGAAAAATTTAACAAGAAAGTAAAATTTTTAAAAAGCTAAATAAATAAACAAAATTAGTCAGTAAAAAAATTTTACACATATACCATGATATATAATAATATATTTAAAAACCTGTGTTAT	5	chrII_236383_G_A;chrII_236390_G_A;chrII_236391_G_A;chrII_236427_TTTC_T;chrII_236441_T_A	59;66;67;103;117	22222	0	firstTileUTR	FALSE
firstTileUTR_00276	YBL001C_5UTR_0	YBL001C_5UTR	chrII	237478	-	GGCGCGCCGTAGTTTATGTGCTTTATAGTTAATGATCACGACGGCAATGACAAAAACTGAATATCTTGATCTCTCCTTTTGACGATGTCAGTGAATCCCGGTTAATGATATTCTGTTTTTCACGGGGTGGAAAAGAGGGGAGCTTGAATCAT	1	chrII_237541_C_T	82	1	0	firstTileUTR	TRUE
firstTileUTR_00277	YBL001C_5UTR_0	YBL001C_5UTR	chrII	237478	-	GGCGCGCCGTAGTTTATGTGCTTTATAGTTAATGATCACGACGGCAATGACAAAAACTGAATATCTTGATTTCTCCTTTTGACGATGTCAGTGAATCCCGGTTAATGATATTCTGTTTTTCACGGGGTGGAAAAGAGGGGAGCTTGAATCAT	1	chrII_237541_C_T	82	2	0	firstTileUTR	TRUE
firstTileUTR_00278	YBR001C_5UTR_0	YBR001C_5UTR	chrII	241339	-	GGCGCGCCAAATATATTTGCAAAGGAAAAATATAAATAAATAAATAAAATTGAGAAATAAAGAATATTAGTTTTAATGGAAAACAGTTCCTACAAGCGCTATAACATATGAAATATACATTAGTCGAATATTAACTTTGGGAGGTAATTACA	1	chrII_241422_T_C	62	1	0	firstTileUTR	FALSE
firstTileUTR_00279	YBR001C_5UTR_0	YBR001C_5UTR	chrII	241339	-	GGCGCGCCAAATATATTTGCAAAGGAAAAATATAAATAAATAAATAAAATTGAGAAATAAAGAATATTAGTTTTAATGGAAAACAGTTCCCACAAGCGCTATAACATATGAAATATACATTAGTCGAATATTAACTTTGGGAGGTAATTACA	1	chrII_241422_T_C	62	2	0	firstTileUTR	FALSE
firstTileUTR_00280	YBR002C_5UTR_0	YBR002C_5UTR	chrII	242593	-	GGCGCGCCATTTTTACTGCTTAAGTTCTATTGAAACCTGTCATTATTACGAAAATTTTTTTTTTTTTCATTCTAAGCATTTTGTTGGCATCTTCGGAAAAAGCCCGAGCGAGGGTAACAGGGTTAGGGGATTAGAAGATTAAAGTAAGACAC	1	chrII_242639_AT_A	99	1	0	firstTileUTR	TRUE
firstTileUTR_00281	YBR002C_5UTR_0	YBR002C_5UTR	chrII	242593	-	GGCGCGCCATTTTTACTGCTTAAGTTCTATTGAAACCTGTCATTATTACGAAAATTTTTTTTTTTTCATTCTAAGCATTTTGTTGGCATCTTCGGAAAAAGCCCGAGCGAGGGTAACAGGGTTAGGGGATTAGAAGATTAAAGTAAGACAC	1	chrII_242639_AT_A	99	2	0	firstTileUTR	TRUE
firstTileUTR_00282	YBR003W_5UTR_0	YBR003W_5UTR	chrII	242780	+	GGCGCGCCGGCACACTTCTTGTGTTGTAGAAAATCTCTATAGATTATAATGTGTCTTACTTTAATCTTCTAATCCCCTAACCCTGTTACCCTCGCTCGGGCTTTTTCCGAAGATGCCAACAAAATGCTTAGAATGAAAAAAAAAAAAATTTT	2	chrII_242639_AT_A;chrII_242746_C_G	4;111	11	0	firstTileUTR	TRUE
firstTileUTR_00283	YBR003W_5UTR_0	YBR003W_5UTR	chrII	242780	+	GGCGCGCCGGCACACTTCTTGTGTTGTAGAAAATCTCTATAGATTATAATGTGTCTTACTTTAATCTTCTAATCCCCTAACCCTGTTACCCTCGCTCGGGCTTTTTCCGAAGATGCCAACAAAATGCTTAGAATGAAAAAAAAAAAATTTT	2	chrII_242639_AT_A;chrII_242746_C_G	4;111	21	0	firstTileUTR	TRUE
firstTileUTR_00284	YBR003W_5UTR_0	YBR003W_5UTR	chrII	242780	+	GGCGCGCCGGCACACTTCTTGTGTTGTAGAAAATCTCTATACATTATAATGTGTCTTACTTTAATCTTCTAATCCCCTAACCCTGTTACCCTCGCTCGGGCTTTTTCCGAAGATGCCAACAAAATGCTTAGAATGAAAAAAAAAAAAATTTT	2	chrII_242639_AT_A;chrII_242746_C_G	4;111	12	0	firstTileUTR	TRUE
firstTileUTR_00285	YBR003W_5UTR_0	YBR003W_5UTR	chrII	242780	+	GGCGCGCCGGCACACTTCTTGTGTTGTAGAAAATCTCTATACATTATAATGTGTCTTACTTTAATCTTCTAATCCCCTAACCCTGTTACCCTCGCTCGGGCTTTTTCCGAAGATGCCAACAAAATGCTTAGAATGAAAAAAAAAAAATTTT	2	chrII_242639_AT_A;chrII_242746_C_G	4;111	22	0	firstTileUTR	TRUE
firstTileUTR_00286	YBR004C_5UTR_0	YBR004C_5UTR	chrII	245683	-	GGCGCGCCATTCCGCCTCCTCTCTCGAAGCCTCTCTTTTATGTCTTTTTTCGATGATGAGGCTTACTTTTTTTTTCAACTAAGCCTTGAAAAAAAAAGTTTGATTTAAAAGGGATTTTCTATTTTAAGTATTTAAATGACCGACAGGAAGCT	2	chrII_245747_T_C;chrII_245763_G_GAAA	81;65	11	0	firstTileUTR	TRUE
firstTileUTR_00287	YBR004C_5UTR_0	YBR004C_5UTR	chrII	245683	-	GGCGCGCCATTCCGCCTCCTCTCTCGAAGCCTCTCTTTTATGTCTTTTTTCGATGATGAGGCTTACTTTTTCTTTCAACTAAGCCTTGAAAAAAAAAGTTTGATTTAAAAGGGATTTTCTATTTTAAGTATTTAAATGACCGACAGGAAGCT	2	chrII_245747_T_C;chrII_245763_G_GAAA	81;65	21	0	firstTileUTR	TRUE
firstTileUTR_00288	YBR004C_5UTR_0	YBR004C_5UTR	chrII	245683	-	GGCGCGCCATTCCGCCTCCTCTCTCGAAGCCTCTCTTTTATGTCTTTTTTCGATGATGAGGCTTACTTTTTTTTTCAACTAAGCCTTGAAAAAAAAAAAAGTTTGATTTAAAAGGGATTTTCTATTTTAAGTATTTAAATGACCGACAGGAAGCT	2	chrII_245747_T_C;chrII_245763_G_GAAA	81;65	12	0	firstTileUTR	TRUE
firstTileUTR_00289	YBR004C_5UTR_0	YBR004C_5UTR	chrII	245683	-	GGCGCGCCATTCCGCCTCCTCTCTCGAAGCCTCTCTTTTATGTCTTTTTTCGATGATGAGGCTTACTTTTTCTTTCAACTAAGCCTTGAAAAAAAAAAAAGTTTGATTTAAAAGGGATTTTCTATTTTAAGTATTTAAATGACCGACAGGAAGCT	2	chrII_245747_T_C;chrII_245763_G_GAAA	81;65	22	0	firstTileUTR	TRUE
firstTileUTR_00290	YBR005W_5UTR_0	YBR005W_5UTR	chrII	245817	+	GGCGCGCCGGTCATTTAAATACTTAAAATAGAAAATCCCTTTTAAATCAAACTTTTTTTTTCAAGGCTTAGTTGAAAAAAAAAGTAAGCCTCATCATCGAAAAAAGACATAAAAGAGAGGCTTCGAGAGAGGAGGCGGAATAAGACTAAATT	2	chrII_245747_T_C;chrII_245763_G_GAAA	75;91	11	0	firstTileUTR	FALSE
firstTileUTR_00291	YBR005W_5UTR_0	YBR005W_5UTR	chrII	245817	+	GGCGCGCCGGTCATTTAAATACTTAAAATAGAAAATCCCTTTTAAATCAAACTTTTTTTTTCAAGGCTTAGTTGAAAGAAAAAGTAAGCCTCATCATCGAAAAAAGACATAAAAGAGAGGCTTCGAGAGAGGAGGCGGAATAAGACTAAATT	2	chrII_245747_T_C;chrII_245763_G_GAAA	75;91	21	0	firstTileUTR	FALSE
firstTileUTR_00292	YBR005W_5UTR_0	YBR005W_5UTR	chrII	245817	+	GGCGCGCCGGTCATTTAAATACTTAAAATAGAAAATCCCTTTTAAATCAAACTTTTTTTTTTTTCAAGGCTTAGTTGAAAAAAAAAGTAAGCCTCATCATCGAAAAAAGACATAAAAGAGAGGCTTCGAGAGAGGAGGCGGAATAAGACTAAATT	2	chrII_245747_T_C;chrII_245763_G_GAAA	75;91	12	0	firstTileUTR	FALSE
firstTileUTR_00293	YBR005W_5UTR_0	YBR005W_5UTR	chrII	245817	+	GGCGCGCCGGTCATTTAAATACTTAAAATAGAAAATCCCTTTTAAATCAAACTTTTTTTTTTTTCAAGGCTTAGTTGAAAGAAAAAGTAAGCCTCATCATCGAAAAAAGACATAAAAGAGAGGCTTCGAGAGAGGAGGCGGAATAAGACTAAATT	2	chrII_245747_T_C;chrII_245763_G_GAAA	75;91	22	0	firstTileUTR	FALSE
firstTileUTR_00294	YBR006W_5UTR_0	YBR006W_5UTR	chrII	246884	+	GGCGCGCCACCCTATTTCCTCTCCATTACTGATGGTGATGTGATGTGATGTGGTGCTATCTTGTCACCCTTAATCCATTGGCCGCCTTTGCTAATCCCGCGCGCATTTTCCCTTTATCACCACCACGCCGTGCGATGGACTTGAAGTATTTA	1	chrII_246816_G_A	77	1	0	firstTileUTR	TRUE
firstTileUTR_00295	YBR006W_5UTR_0	YBR006W_5UTR	chrII	246884	+	GGCGCGCCACCCTATTTCCTCTCCATTACTGATGGTGATGTGATGTGATGTGGTGCTATCTTGTCACCCTTAATCTATTGGCCGCCTTTGCTAATCCCGCGCGCATTTTCCCTTTATCACCACCACGCCGTGCGATGGACTTGAAGTATTTA	1	chrII_246816_G_A	77	2	0	firstTileUTR	TRUE
firstTileUTR_00296	YBR007C_5UTR_0	YBR007C_5UTR	chrII	251106	-	GGCGCGCCGAGGAACAGAATGTGCTATCGCAAAGAGCAATGGCAACAGAAAAAAAGAGTTGCTAAAGAAGAACTATTTTTGAATGTCCGTGGTAATACAATGGAAGACTACTAGAACACGATGGCAGATAAGGTGATTTGATAATCAAATTC	1	chrII_251134_G_T	117	1	0	firstTileUTR	FALSE
firstTileUTR_00297	YBR007C_5UTR_0	YBR007C_5UTR	chrII	251106	-	GGCGCGCCGAGGAACAGAATGTGCTATCGCAAAGATCAATGGCAACAGAAAAAAAGAGTTGCTAAAGAAGAACTATTTTTGAATGTCCGTGGTAATACAATGGAAGACTACTAGAACACGATGGCAGATAAGGTGATTTGATAATCAAATTC	1	chrII_251134_G_T	117	2	0	firstTileUTR	FALSE
firstTileUTR_00298	YBR008C_5UTR_0	YBR008C_5UTR	chrII	254427	-	GGCGCGCCACTGTTATTGCTCCTTACCTAAGCAAATATCCTTTTTTTTTTCTTTGCATTTGTCTTCTTTCATTTTAAATCTTCATAATCTTCCGGAAAAACTAGTGATGCGAAATATTGTAGAGAAAAAGCGCAGGGCATTCCTATACTTAG	1	chrII_254436_T_C	136	1	0	firstTileUTR	TRUE
firstTileUTR_00299	YBR008C_5UTR_0	YBR008C_5UTR	chrII	254427	-	GGCGCGCCACTGTTATCGCTCCTTACCTAAGCAAATATCCTTTTTTTTTTCTTTGCATTTGTCTTCTTTCATTTTAAATCTTCATAATCTTCCGGAAAAACTAGTGATGCGAAATATTGTAGAGAAAAAGCGCAGGGCATTCCTATACTTAG	1	chrII_254436_T_C	136	2	0	firstTileUTR	TRUE
firstTileUTR_00300	YBR009C_5UTR_0	YBR009C_5UTR	chrII	255723	-	GGCGCGCCGCTTTAGTACTATAGAGTACAATAATGCGACGGAAACCATCATATAGAAAAAATATCTCGGTATTTATAGGAAAAAGAATTAGACCTTTTCCACAACCAATTTATCCATCAAATTGGTCTTTACCCAATGAATGGGGAAGGGGG	3	chrII_255740_G_A;chrII_255743_C_T;chrII_255828_T_C	128;125;40	111	0	firstTileUTR	FALSE
firstTileUTR_00301	YBR009C_5UTR_0	YBR009C_5UTR	chrII	255723	-	GGCGCGCCGCTTTAGTACTATAGAATACAATAATGCGACGGAAACCATCATATAGAAAAAATATCTCGGTATTTATAGGAAAAAGAATTAGACCTTTTCCACAACCAATTTATCCATCAAATTGGTCTTTACCCAATGAATGGGGAAGGGGG	3	chrII_255740_G_A;chrII_255743_C_T;chrII_255828_T_C	128;125;40	211	0	firstTileUTR	FALSE
firstTileUTR_00302	YBR009C_5UTR_0	YBR009C_5UTR	chrII	255723	-	GGCGCGCCGCTTTAGTACTATAGAGTATAATAATGCGACGGAAACCATCATATAGAAAAAATATCTCGGTATTTATAGGAAAAAGAATTAGACCTTTTCCACAACCAATTTATCCATCAAATTGGTCTTTACCCAATGAATGGGGAAGGGGG	3	chrII_255740_G_A;chrII_255743_C_T;chrII_255828_T_C	128;125;40	121	0	firstTileUTR	FALSE
firstTileUTR_00303	YBR009C_5UTR_0	YBR009C_5UTR	chrII	255723	-	GGCGCGCCGCTTTAGTACTATAGAGTACAATAATGCGACGGAAACCATCATATAGAAAAAATATCTCGGTATTTATAGGAAAAAGAATTAGACCTTTTCCACAACCAATTTACCCATCAAATTGGTCTTTACCCAATGAATGGGGAAGGGGG	3	chrII_255740_G_A;chrII_255743_C_T;chrII_255828_T_C	128;125;40	112	0	firstTileUTR	FALSE
firstTileUTR_00304	YBR009C_5UTR_0	YBR009C_5UTR	chrII	255723	-	GGCGCGCCGCTTTAGTACTATAGAATATAATAATGCGACGGAAACCATCATATAGAAAAAATATCTCGGTATTTATAGGAAAAAGAATTAGACCTTTTCCACAACCAATTTACCCATCAAATTGGTCTTTACCCAATGAATGGGGAAGGGGG	3	chrII_255740_G_A;chrII_255743_C_T;chrII_255828_T_C	128;125;40	222	0	firstTileUTR	FALSE
firstTileUTR_00305	YBR010W_5UTR_0	YBR010W_5UTR	chrII	256303	+	GGCGCGCCGTTTTTCTTATTAACTAGAAAGAAAGAATATAAAAGGTTGAGGAAAGAGATGTATCCCGAAGAATACACAGTCTTTTATATATGTATTTCAACAAGGAGCCGTGGAGGGTACCAAAAAGAAAAATCGCCCGGGCATTTCGTTAT	1	chrII_256267_C_A	109	1	0	firstTileUTR	FALSE
firstTileUTR_00306	YBR010W_5UTR_0	YBR010W_5UTR	chrII	256303	+	GGCGCGCCGTTTTTCTTATTAACTAGAAAGAAAGAATATAAAATGTTGAGGAAAGAGATGTATCCCGAAGAATACACAGTCTTTTATATATGTATTTCAACAAGGAGCCGTGGAGGGTACCAAAAAGAAAAATCGCCCGGGCATTTCGTTAT	1	chrII_256267_C_A	109	2	0	firstTileUTR	FALSE
firstTileUTR_00307	YBR014C_5UTR_0	YBR014C_5UTR	chrII	267432	-	GGCGCGCCGAGGGGATATGTACACATTGGCAAATATCCTGCCGAAAGTACTTCTTTATTTTTTTTCAAAACGCAGTCCCACTTACCGGTATGACGTAGTCTCGATTCTCAAATACACCCGGGACTGCATATTTATACATCTGTAGTAAAGTC	3	chrII_267481_A_AT;chrII_267510_C_T;chrII_267525_T_A	96;67;52	111	0	firstTileUTR	TRUE
firstTileUTR_00308	YBR014C_5UTR_0	YBR014C_5UTR	chrII	267432	-	GGCGCGCCGAGGGGATATGTACACATTGGCAAATATCCTGCCGAAAGTACTTCTTTATTTTTTTTTCAAAACGCAGTCCCACTTACCGGTATGACGTAGTCTCGATTCTCAAATACACCCGGGACTGCATATTTATACATCTGTAGTAAAGTC	3	chrII_267481_A_AT;chrII_267510_C_T;chrII_267525_T_A	96;67;52	211	0	firstTileUTR	TRUE
firstTileUTR_00309	YBR014C_5UTR_0	YBR014C_5UTR	chrII	267432	-	GGCGCGCCGAGGGGATATGTACACATTGGCAAATATCCTGCCGAAAGTACTTCTTTATTTTTTTTCAAAACGCAGTCCCACTTACTGGTATGACGTAGTCTCGATTCTCAAATACACCCGGGACTGCATATTTATACATCTGTAGTAAAGTC	3	chrII_267481_A_AT;chrII_267510_C_T;chrII_267525_T_A	96;67;52	121	0	firstTileUTR	TRUE
firstTileUTR_00310	YBR014C_5UTR_0	YBR014C_5UTR	chrII	267432	-	GGCGCGCCGAGGGGATATGTACACATTGGCAAATATCCTGCCGAAAGTACTTCTTTATTTTTTTTCAAAACGCAGTCCCACTTACCGGTATGACGTAGTCACGATTCTCAAATACACCCGGGACTGCATATTTATACATCTGTAGTAAAGTC	3	chrII_267481_A_AT;chrII_267510_C_T;chrII_267525_T_A	96;67;52	112	0	firstTileUTR	TRUE
firstTileUTR_00311	YBR014C_5UTR_0	YBR014C_5UTR	chrII	267432	-	GGCGCGCCGAGGGGATATGTACACATTGGCAAATATCCTGCCGAAAGTACTTCTTTATTTTTTTTTCAAAACGCAGTCCCACTTACTGGTATGACGTAGTCACGATTCTCAAATACACCCGGGACTGCATATTTATACATCTGTAGTAAAGTC	3	chrII_267481_A_AT;chrII_267510_C_T;chrII_267525_T_A	96;67;52	222	0	firstTileUTR	TRUE
firstTileUTR_00312	YBR015C_5UTR_0	YBR015C_5UTR	chrII	269631	-	GGCGCGCCACGTAATTTATTTTGATGATTCTTCTATATTTTTTTTTTCTTCATTGTTATTTTTTCACTATCTTTTTCATCCCTCCGCAAAAGGACGCGATCCTTTTTTAGCACGTGAACGGTAATAACGGGTCCTGGACGATGTATTAGAGT	1	chrII_269653_C_T	123	1	0	firstTileUTR	TRUE
firstTileUTR_00313	YBR015C_5UTR_0	YBR015C_5UTR	chrII	269631	-	GGCGCGCCACGTAATTTATTTTGATGATTTTTCTATATTTTTTTTTTCTTCATTGTTATTTTTTCACTATCTTTTTCATCCCTCCGCAAAAGGACGCGATCCTTTTTTAGCACGTGAACGGTAATAACGGGTCCTGGACGATGTATTAGAGT	1	chrII_269653_C_T	123	2	0	firstTileUTR	TRUE
firstTileUTR_00314	YBR019C_5UTR_0	YBR019C_5UTR	chrII	278377	-	GGCGCGCCACTTTTTTTTTGGATGGACGCAAAGAAGTTTAATAATCATATTACATGGCATTACCACCATATACATATCCATATCTAATCTTACTTATATGTTGTGGAAATGTAAAGAGCCCCATTATCTTAGCCTAAAAAAACCTTCTCTTT	1	chrII_278379_CT_C	143	1	0	firstTileUTR	TRUE
firstTileUTR_00315	YBR019C_5UTR_0	YBR019C_5UTR	chrII	278377	-	GGCGCGCCACTTTTTTTTGGATGGACGCAAAGAAGTTTAATAATCATATTACATGGCATTACCACCATATACATATCCATATCTAATCTTACTTATATGTTGTGGAAATGTAAAGAGCCCCATTATCTTAGCCTAAAAAAACCTTCTCTTT	1	chrII_278379_CT_C	143	2	0	firstTileUTR	TRUE
firstTileUTR_00316	YBR022W_5UTR_0	YBR022W_5UTR	chrII	283676	+	GGCGCGCCAGAAATCTGGGCTTCAAGTTCGCATAGCATAACGAATCGTAAAGTTATGCATATGGCATAATACAACAATTATCCATTTTTTCTCGTGTGTAAAAAGAGAAAGGAGAGAGGAAAGAACGCTAAGCCATAAAGCAAACAAAAAAT	1	chrII_283573_C_T	42	1	0	firstTileUTR	FALSE
firstTileUTR_00317	YBR022W_5UTR_0	YBR022W_5UTR	chrII	283676	+	GGCGCGCCAGAAATCTGGGCTTCAAGTTCGCATAGCATAACGAATCGTAAAGTTATGCATATGGCATAATACAACAATTATCCATTTTTTCTCGTGTGTAAAAAGAGAAAAGAGAGAGGAAAGAACGCTAAGCCATAAAGCAAACAAAAAAT	1	chrII_283573_C_T	42	2	0	firstTileUTR	FALSE
firstTileUTR_00318	YBR028C_5UTR_0	YBR028C_5UTR	chrII	296083	-	GGCGCGCCACTTACTATTAGTCAGTACGTCCTTTTTTCATTTGTTTATAATTTTTTTTTTTTTTTTTTTTTTCTCCTCTCAATATTTTAGAAGTAACATGACAGAGCAACACGTTTATTTTCCTACATATAGTCATAAGTATAAAAACGAGC	1	chrII_296198_C_G	30	1	0	firstTileUTR	TRUE
firstTileUTR_00319	YBR028C_5UTR_0	YBR028C_5UTR	chrII	296083	-	GGCGCGCCACTTACTATTAGTCAGTACGTCCTTTTTTCATTTGTTTATAATTTTTTTTTTTTTTTTTTTTTTCTCCTCTCAATATTTTAGAAGTAACATGACAGAGCAACACGTTTATTTTCGTACATATAGTCATAAGTATAAAAACGAGC	1	chrII_296198_C_G	30	2	0	firstTileUTR	TRUE
firstTileUTR_00320	YBR030W_5UTR_0	YBR030W_5UTR	chrII	298235	+	GGCGCGCCATTGTATCTGCCACCTCATCTCAGCTGCCTTCATCGAGTATACTTCATTTGATTTTCTGATATTTATTGCTCGTTTTTCGCTATTTTGATGCAGTACATCTCAGAATTCAACGGAGAACGTGGATATATTAGGCACAAAGAATC	1	chrII_298141_C_T	51	1	0	firstTileUTR	TRUE
firstTileUTR_00321	YBR030W_5UTR_0	YBR030W_5UTR	chrII	298235	+	GGCGCGCCATTGTATCTGCCACCTCATCTCAGCTGCCTTCATCGAGTATACTTCATTTGATTTTCTGATATTTATTGCTCGTTTTTCGCTATTTTGATGCAATACATCTCAGAATTCAACGGAGAACGTGGATATATTAGGCACAAAGAATC	1	chrII_298141_C_T	51	2	0	firstTileUTR	TRUE
firstTileUTR_00322	YBR031W_5UTR_0	YBR031W_5UTR	chrII	300150	+	GGCGCGCCGGGATATTGCTAAATTACAAGAAAAGTGATGAAAAGTACAAGTTGCGAGGCTAAAAGAAATGTGATGGAGATACCATTCGTTTATATAAATTTTTTTTTTTTTTTTTTTTTTTTTTCAGATTGAAAAAAAATTTTTCACTTCTC	2	chrII_300033_GAAAAAAAA_GAAA;chrII_300111_G_A	28;106	11	0	firstTileUTR	TRUE
firstTileUTR_00323	YBR031W_5UTR_0	YBR031W_5UTR	chrII	300150	+	GGCGCGCCGGGATATTGCTAAATTACAAGAAAAGTGATGAAAAGTACAAGTTGCGAGGCTAAAAGAAATGTGATGGAGATACCATTCGTTTATATAAATTTTTTTTTTTTTTTTTTTTTCAGATTGAAAAAAAATTTTTCACTTCTC	2	chrII_300033_GAAAAAAAA_GAAA;chrII_300111_G_A	28;106	21	0	firstTileUTR	TRUE
firstTileUTR_00324	YBR031W_5UTR_0	YBR031W_5UTR	chrII	300150	+	GGCGCGCCGGGATATTGCTAAATTACAAGAAAAGTGATGAAAAGTATAAGTTGCGAGGCTAAAAGAAATGTGATGGAGATACCATTCGTTTATATAAATTTTTTTTTTTTTTTTTTTTTTTTTTCAGATTGAAAAAAAATTTTTCACTTCTC	2	chrII_300033_GAAAAAAAA_GAAA;chrII_300111_G_A	28;106	12	0	firstTileUTR	TRUE
firstTileUTR_00325	YBR031W_5UTR_0	YBR031W_5UTR	chrII	300150	+	GGCGCGCCGGGATATTGCTAAATTACAAGAAAAGTGATGAAAAGTATAAGTTGCGAGGCTAAAAGAAATGTGATGGAGATACCATTCGTTTATATAAATTTTTTTTTTTTTTTTTTTTTCAGATTGAAAAAAAATTTTTCACTTCTC	2	chrII_300033_GAAAAAAAA_GAAA;chrII_300111_G_A	28;106	22	0	firstTileUTR	TRUE
firstTileUTR_00326	YBR039W_5UTR_0	YBR039W_5UTR	chrII	315488	+	GGCGCGCCATTTGTCTTTTTTAACTGAGTGATAATCATTTAAGCATCTCCCTTCCGGGCCTTCTTTAATCGTTATTGCGGTCCGGGTTCCTCGCGTAGTTACTCGCCGCTCATTGGTTCTCCATCACGTGATAAACATTTCTTCCAAATAAA	1	chrII_315453_C_T	110	1	0	firstTileUTR	TRUE
firstTileUTR_00327	YBR039W_5UTR_0	YBR039W_5UTR	chrII	315488	+	GGCGCGCCATTTGTCTTTTTTAACTGAGTGATAATCATTTAAACATCTCCCTTCCGGGCCTTCTTTAATCGTTATTGCGGTCCGGGTTCCTCGCGTAGTTACTCGCCGCTCATTGGTTCTCCATCACGTGATAAACATTTCTTCCAAATAAA	1	chrII_315453_C_T	110	2	0	firstTileUTR	TRUE
firstTileUTR_00328	YBR043C_5UTR_0	YBR043C_5UTR	chrII	324094	-	GGCGCGCCAATCTTTTAATATTTTAATCTAATCGCAGTTATCCAAAACTGGAATGAGATGGTTCAAATCCCCAAAGGTAGATGGAGTTACTGCTGAGGCGTGGAAAAACCCGAGTTTTTCCGAAGCCGCATATGAGAAATTGAGCAGGAATA	2	chrII_324106_A_C;chrII_324220_G_A	133;19	11	0	firstTileUTR	FALSE
firstTileUTR_00329	YBR043C_5UTR_0	YBR043C_5UTR	chrII	324094	-	GGCGCGCCAATCTTTTAATCTTTTAATCTAATCGCAGTTATCCAAAACTGGAATGAGATGGTTCAAATCCCCAAAGGTAGATGGAGTTACTGCTGAGGCGTGGAAAAACCCGAGTTTTTCCGAAGCCGCATATGAGAAATTGAGCAGGAATA	2	chrII_324106_A_C;chrII_324220_G_A	133;19	21	0	firstTileUTR	FALSE
firstTileUTR_00330	YBR043C_5UTR_0	YBR043C_5UTR	chrII	324094	-	GGCGCGCCAATCTTTTAATATTTTAATCTAATCGCAGTTATCCAAAACTGGAATGAGATGGTTCAAATCCCCAAAGGTAGATGGAGTTACTGCTGAGGCGTGGAAAAACCCGAGTTTTTCCGAAGCCGCATATAAGAAATTGAGCAGGAATA	2	chrII_324106_A_C;chrII_324220_G_A	133;19	12	0	firstTileUTR	FALSE
firstTileUTR_00331	YBR043C_5UTR_0	YBR043C_5UTR	chrII	324094	-	GGCGCGCCAATCTTTTAATCTTTTAATCTAATCGCAGTTATCCAAAACTGGAATGAGATGGTTCAAATCCCCAAAGGTAGATGGAGTTACTGCTGAGGCGTGGAAAAACCCGAGTTTTTCCGAAGCCGCATATAAGAAATTGAGCAGGAATA	2	chrII_324106_A_C;chrII_324220_G_A	133;19	22	0	firstTileUTR	FALSE
firstTileUTR_00332	YBR044C_5UTR_0	YBR044C_5UTR	chrII	326092	-	GGCGCGCCAGTAGTGTGGGAGAAAATAACGCCAGGTTAAAGCTCGTAAAAGGTAAACTATCGCACTATCGAAACTTTTGTTTCACAGGGAATGGAAGAAAGGGCCTTTATTTTTTACATTTTTTTAAGCCATAACGGATTTTAGTTACCGAG	2	chrII_326112_A_T;chrII_326179_A_G	125;58	11	0	firstTileUTR	FALSE
firstTileUTR_00333	YBR044C_5UTR_0	YBR044C_5UTR	chrII	326092	-	GGCGCGCCAGTAGTGTGGGAGAAAATATCGCCAGGTTAAAGCTCGTAAAAGGTAAACTATCGCACTATCGAAACTTTTGTTTCACAGGGAATGGAAGAAAGGGCCTTTATTTTTTACATTTTTTTAAGCCATAACGGATTTTAGTTACCGAG	2	chrII_326112_A_T;chrII_326179_A_G	125;58	21	0	firstTileUTR	FALSE
firstTileUTR_00334	YBR044C_5UTR_0	YBR044C_5UTR	chrII	326092	-	GGCGCGCCAGTAGTGTGGGAGAAAATAACGCCAGGTTAAAGCTCGTAAAAGGTAAACTATCGCACTATCGAAACTTTTGTTTCACAGGGAATGGGAGAAAGGGCCTTTATTTTTTACATTTTTTTAAGCCATAACGGATTTTAGTTACCGAG	2	chrII_326112_A_T;chrII_326179_A_G	125;58	12	0	firstTileUTR	FALSE
firstTileUTR_00335	YBR044C_5UTR_0	YBR044C_5UTR	chrII	326092	-	GGCGCGCCAGTAGTGTGGGAGAAAATATCGCCAGGTTAAAGCTCGTAAAAGGTAAACTATCGCACTATCGAAACTTTTGTTTCACAGGGAATGGGAGAAAGGGCCTTTATTTTTTACATTTTTTTAAGCCATAACGGATTTTAGTTACCGAG	2	chrII_326112_A_T;chrII_326179_A_G	125;58	22	0	firstTileUTR	FALSE
firstTileUTR_00336	YBR045C_5UTR_0	YBR045C_5UTR	chrII	330200	-	GGCGCGCCAATTATCTATTTTTCAAATAAAATCAGGGAGAAAGGAAAGTACAAATAAATTTTTATTCGAATGGTTTTGTTAATATGTATTTATTTTATTTTTGTTGCACTTTTTTGTCGAAGAAGTCCCCGATTTTTACAGTGTCACACTTA	1	chrII_330203_T_A	142	1	0	firstTileUTR	TRUE
firstTileUTR_00337	YBR045C_5UTR_0	YBR045C_5UTR	chrII	330200	-	GGCGCGCCAAATATCTATTTTTCAAATAAAATCAGGGAGAAAGGAAAGTACAAATAAATTTTTATTCGAATGGTTTTGTTAATATGTATTTATTTTATTTTTGTTGCACTTTTTTGTCGAAGAAGTCCCCGATTTTTACAGTGTCACACTTA	1	chrII_330203_T_A	142	2	0	firstTileUTR	TRUE
firstTileUTR_00338	YBR046C_5UTR_0	YBR046C_5UTR	chrII	331542	-	GGCGCGCCAATGCTTACTAGTAGCTTCAAAATATCTACTTTGCAAACCGCAAGGAGATCTCACTTTCAAGATATAGTATTTGTAAGAGGGGAAGTTAACGCTCGGCTAAATCGTTCGGATCGACACCGAGCGGCACGTACTATATTATCCGA	1	chrII_331557_G_A	130	1	0	firstTileUTR	FALSE
firstTileUTR_00339	YBR046C_5UTR_0	YBR046C_5UTR	chrII	331542	-	GGCGCGCCAATGCTTACTAGTAACTTCAAAATATCTACTTTGCAAACCGCAAGGAGATCTCACTTTCAAGATATAGTATTTGTAAGAGGGGAAGTTAACGCTCGGCTAAATCGTTCGGATCGACACCGAGCGGCACGTACTATATTATCCGA	1	chrII_331557_G_A	130	2	0	firstTileUTR	FALSE
firstTileUTR_00340	YBR047W_5UTR_0	YBR047W_5UTR	chrII	331813	+	GGCGCGCCAGTTATGTTCACAGAACAAAGATTTACTCCTACATATGATTATTATTCAGGTATAACATGAATAATACTTTCACTTCTTGCGTGACATTAGAAGTTGCACCCTTCATTTCTAGATGAGTAATCAGTTCGGATAATATAGTACGT	2	chrII_331783_G_A;chrII_331804_A_G	115;136	11	0	firstTileUTR	TRUE
firstTileUTR_00341	YBR047W_5UTR_0	YBR047W_5UTR	chrII	331813	+	GGCGCGCCAGTTATGTTCACAGAACAAAGATTTACTCTTACATATGATTATTATTCAGGTATAACATGAATAATACTTTCACTTCTTGCGTGACATTAGAAGTTGCACCCTTCATTTCTAGATGAGTAATCAGTTCGGATAATATAGTACGT	2	chrII_331783_G_A;chrII_331804_A_G	115;136	21	0	firstTileUTR	TRUE
firstTileUTR_00342	YBR047W_5UTR_0	YBR047W_5UTR	chrII	331813	+	GGCGCGCCAGTTATGTCCACAGAACAAAGATTTACTCCTACATATGATTATTATTCAGGTATAACATGAATAATACTTTCACTTCTTGCGTGACATTAGAAGTTGCACCCTTCATTTCTAGATGAGTAATCAGTTCGGATAATATAGTACGT	2	chrII_331783_G_A;chrII_331804_A_G	115;136	12	0	firstTileUTR	TRUE
firstTileUTR_00343	YBR047W_5UTR_0	YBR047W_5UTR	chrII	331813	+	GGCGCGCCAGTTATGTCCACAGAACAAAGATTTACTCTTACATATGATTATTATTCAGGTATAACATGAATAATACTTTCACTTCTTGCGTGACATTAGAAGTTGCACCCTTCATTTCTAGATGAGTAATCAGTTCGGATAATATAGTACGT	2	chrII_331783_G_A;chrII_331804_A_G	115;136	22	0	firstTileUTR	TRUE
firstTileUTR_00344	YBR048W_5UTR_0	YBR048W_5UTR	chrII	332811	+	GGCGCGCCGTTTCCTCTAAGTCTTCAGCAAATGCTACTATGTAAATTGTACTAGCTATGTTATTATCACTATTTTACCTATTGATTATAGATTTTCAACAGACGCAGCAGAGAAGGGAAACGTAAAGCTATTGGACTTGCCCGCT	2	chrII_332691_G_GCTTTACGTTTCC;chrII_332772_A_G	18;99	11	0	firstTileUTR	TRUE
firstTileUTR_00345	YBR048W_5UTR_0	YBR048W_5UTR	chrII	332811	+	GGCGCGCCGTTTCCTCTAAGTCTTCAGCAAATGCTACTATGTAAATTGTACTAGCTATGTTATTATCACTATTTTACCTATTGATTATAGATTTTCAACAGACGCAGCAGAGAAGGGAAACGTAAAGGGAAACGTAAAGCTATTGGACTTGCCCGCT	2	chrII_332691_G_GCTTTACGTTTCC;chrII_332772_A_G	18;99	21	0	firstTileUTR	FALSE
firstTileUTR_00346	YBR048W_5UTR_0	YBR048W_5UTR	chrII	332811	+	GGCGCGCCGTTTCCTCTAAGTCTTCAGCAAATGCTACTATGTAAATCGTACTAGCTATGTTATTATCACTATTTTACCTATTGATTATAGATTTTCAACAGACGCAGCAGAGAAGGGAAACGTAAAGCTATTGGACTTGCCCGCT	2	chrII_332691_G_GCTTTACGTTTCC;chrII_332772_A_G	18;99	12	0	firstTileUTR	TRUE
firstTileUTR_00347	YBR048W_5UTR_0	YBR048W_5UTR	chrII	332811	+	GGCGCGCCGTTTCCTCTAAGTCTTCAGCAAATGCTACTATGTAAATCGTACTAGCTATGTTATTATCACTATTTTACCTATTGATTATAGATTTTCAACAGACGCAGCAGAGAAGGGAAACGTAAAGGGAAACGTAAAGCTATTGGACTTGCCCGCT	2	chrII_332691_G_GCTTTACGTTTCC;chrII_332772_A_G	18;99	22	0	firstTileUTR	FALSE
firstTileUTR_00348	YBR049C_5UTR_0	YBR049C_5UTR	chrII	336967	-	GGCGCGCCGTTTTATCTTGTGTGGTCAAGAAAGCTGCCATTTGTTTGTCGTTGTCCTTTGTGAGGGTAGGTCCCTTGGCCGCCTTTGGTTTGCCACCCGGCATGGGCCCAATTTGAAAGACGGGTAACAAAGTTGTTGCTATATATCACGTG	2	chrII_337074_G_A;chrII_337088_A_C	38;24	11	0	firstTileUTR	TRUE
firstTileUTR_00349	YBR049C_5UTR_0	YBR049C_5UTR	chrII	336967	-	GGCGCGCCGTTTTATCTTGTGTGGTCAAGAAAGCTGCCATTTGTTTGTCGTTGTCCTTTGTGAGGGTAGGTCCCTTGGCCGCCTTTGGTTTGCCACCCGGCATGGGCCCAATTTAAAAGACGGGTAACAAAGTTGTTGCTATATATCACGTG	2	chrII_337074_G_A;chrII_337088_A_C	38;24	21	0	firstTileUTR	TRUE
firstTileUTR_00350	YBR049C_5UTR_0	YBR049C_5UTR	chrII	336967	-	GGCGCGCCGTTTTATCTTGTGTGGTCAAGAAAGCTGCCATTTGTTTGTCGTTGTCCTTTGTGAGGGTAGGTCCCTTGGCCGCCTTTGGTTTGCCACCCGGCATGGGCCCAATTTGAAAGACGGGTAACCAAGTTGTTGCTATATATCACGTG	2	chrII_337074_G_A;chrII_337088_A_C	38;24	12	0	firstTileUTR	TRUE
firstTileUTR_00351	YBR049C_5UTR_0	YBR049C_5UTR	chrII	336967	-	GGCGCGCCGTTTTATCTTGTGTGGTCAAGAAAGCTGCCATTTGTTTGTCGTTGTCCTTTGTGAGGGTAGGTCCCTTGGCCGCCTTTGGTTTGCCACCCGGCATGGGCCCAATTTAAAAGACGGGTAACCAAGTTGTTGCTATATATCACGTG	2	chrII_337074_G_A;chrII_337088_A_C	38;24	22	0	firstTileUTR	TRUE
firstTileUTR_00352	YBR052C_5UTR_0	YBR052C_5UTR	chrII	339416	-	GGCGCGCCGTTTCTCGAGAAAAGTGTGATATAAAATGTGGTTTCTTTTTATTTCTTTTCTTTTCCGCTCTTTTATGTATTTTTGATTGTCCGCCCCTTAGGTGTTCCCTCCTTATAACTAGGCAACCAAAATGGAACGGCTATTATTCGATG	2	chrII_339511_G_A;chrII_339542_G_A	50;19	11	0	firstTileUTR	TRUE
firstTileUTR_00353	YBR052C_5UTR_0	YBR052C_5UTR	chrII	339416	-	GGCGCGCCGTTTCTCGAGAAAAGTGTGATATAAAATGTGGTTTCTTTTTATTTCTTTTCTTTTCCGCTCTTTTATGTATTTTTGATTGTCCGCCCCTTAGGTATTCCCTCCTTATAACTAGGCAACCAAAATGGAACGGCTATTATTCGATG	2	chrII_339511_G_A;chrII_339542_G_A	50;19	21	0	firstTileUTR	TRUE
firstTileUTR_00354	YBR052C_5UTR_0	YBR052C_5UTR	chrII	339416	-	GGCGCGCCGTTTCTCGAGAAAAGTGTGATATAAAATGTGGTTTCTTTTTATTTCTTTTCTTTTCCGCTCTTTTATGTATTTTTGATTGTCCGCCCCTTAGGTGTTCCCTCCTTATAACTAGGCAACCAAAATGAAACGGCTATTATTCGATG	2	chrII_339511_G_A;chrII_339542_G_A	50;19	12	0	firstTileUTR	TRUE
firstTileUTR_00355	YBR052C_5UTR_0	YBR052C_5UTR	chrII	339416	-	GGCGCGCCGTTTCTCGAGAAAAGTGTGATATAAAATGTGGTTTCTTTTTATTTCTTTTCTTTTCCGCTCTTTTATGTATTTTTGATTGTCCGCCCCTTAGGTATTCCCTCCTTATAACTAGGCAACCAAAATGAAACGGCTATTATTCGATG	2	chrII_339511_G_A;chrII_339542_G_A	50;19	22	0	firstTileUTR	TRUE
firstTileUTR_00356	YBR053C_5UTR_0	YBR053C_5UTR	chrII	340763	-	GGCGCGCCGTCTAGTTGCTCAATGCATATAAACTTAATCTAAGAATCTTACAGGACATCTTCATATATGTCCATATGCTTTGAATAAGCATTGGCTTCCCCTTAAAGCCCGACCGGGTAAACTTTCACCTAGCTGTTCTTGGCGACCATTAA	1	chrII_340824_G_A	84	1	0	firstTileUTR	TRUE
firstTileUTR_00357	YBR053C_5UTR_0	YBR053C_5UTR	chrII	340763	-	GGCGCGCCGTCTAGTTGCTCAATGCATATAAACTTAATCTAAGAATCTTACAGGACATCTTCATATATATCCATATGCTTTGAATAAGCATTGGCTTCCCCTTAAAGCCCGACCGGGTAAACTTTCACCTAGCTGTTCTTGGCGACCATTAA	1	chrII_340824_G_A	84	2	0	firstTileUTR	TRUE
firstTileUTR_00358	YBR054W_5UTR_0	YBR054W_5UTR	chrII	342781	+	GGCGCGCCATAATCGTAAATGAGAAAAGGTTAATAACAAATATCGAAGAAAACAAGAGAAGAAAAGGGCGGAAAACCATAACTAACACACTGTCTTACATGTAAACCGAATAAGTTCGGTTCTTTATATATCTTTTCGGTAAGCTTCCAGTA	2	chrII_342642_G_A;chrII_342723_C_T	6;87	11	0	firstTileUTR	FALSE
firstTileUTR_00359	YBR054W_5UTR_0	YBR054W_5UTR	chrII	342781	+	GGCGCGCCATAATCGTAAATGAGAAAAGGTTAATAACAAATATCGAAGAAAACAAGAGAAGAAAAGGGCGGAAAACCATAACTAACACACTGTCTTACATGTAAACCGAATAAGTTCGGTTCTTTATATATCTTTTCGGTAAGCTTTCAGTA	2	chrII_342642_G_A;chrII_342723_C_T	6;87	21	0	firstTileUTR	FALSE
firstTileUTR_00360	YBR054W_5UTR_0	YBR054W_5UTR	chrII	342781	+	GGCGCGCCATAATCGTAAATGAGAAAAGGTTAATAACAAATATCGAAGAAAACAAGAGAAGAAAAAGGCGGAAAACCATAACTAACACACTGTCTTACATGTAAACCGAATAAGTTCGGTTCTTTATATATCTTTTCGGTAAGCTTCCAGTA	2	chrII_342642_G_A;chrII_342723_C_T	6;87	12	0	firstTileUTR	FALSE
firstTileUTR_00361	YBR054W_5UTR_0	YBR054W_5UTR	chrII	342781	+	GGCGCGCCATAATCGTAAATGAGAAAAGGTTAATAACAAATATCGAAGAAAACAAGAGAAGAAAAAGGCGGAAAACCATAACTAACACACTGTCTTACATGTAAACCGAATAAGTTCGGTTCTTTATATATCTTTTCGGTAAGCTTTCAGTA	2	chrII_342642_G_A;chrII_342723_C_T	6;87	22	0	firstTileUTR	FALSE
firstTileUTR_00362	YBR055C_5UTR_0	YBR055C_5UTR	chrII	347308	-	GGCGCGCCGACGTTTTCTTGCTGTTAAACTCTTTATGTCAACTCACCCGTATATTTTCTGAAATTTTTCGTTTTTTTTTGCTTAATAGAACAATCTGACACACTATAAATGTACTGGTTAAATTAGCCCAAGGTTCTATCAACGGTAAAGAA	1	chrII_347317_C_T	136	1	0	firstTileUTR	TRUE
firstTileUTR_00363	YBR055C_5UTR_0	YBR055C_5UTR	chrII	347308	-	GGCGCGCCGACGTTTTTTTGCTGTTAAACTCTTTATGTCAACTCACCCGTATATTTTCTGAAATTTTTCGTTTTTTTTTGCTTAATAGAACAATCTGACACACTATAAATGTACTGGTTAAATTAGCCCAAGGTTCTATCAACGGTAAAGAA	1	chrII_347317_C_T	136	2	0	firstTileUTR	TRUE
firstTileUTR_00364	YBR056W_5UTR_0	YBR056W_5UTR	chrII	347867	+	GGCGCGCCAAAAGTTTTAATAAATTTTATAGATGGATAGAGAGTCTTTTTTAAAGCAACTCTTCCCAACAGAGTTCGAATTGAAGAAAAGAAAGTTATGTCTTAGTTCATCCATCCCCCCTAATTCCCTTCTTTTAAGCATTTTTTAAGCCA	3	chrII_347777_A_G;chrII_347803_T_A;chrII_347856_T_G	55;81;134	111	0	firstTileUTR	TRUE
firstTileUTR_00365	YBR056W_5UTR_0	YBR056W_5UTR	chrII	347867	+	GGCGCGCCAAAAGTTTTAATAAATTTTATAGATGGATAGAGAGTCTTTTTTAAAGCAACTCTTCCCAACAGAGTTCGAATTGAAGAAAAGAAAGTTACGTCTTAGTTCATCCATCCCCCCTAATTCCCTTCTTTTAAGCATTTTTTAAGCCA	3	chrII_347777_A_G;chrII_347803_T_A;chrII_347856_T_G	55;81;134	211	0	firstTileUTR	TRUE
firstTileUTR_00366	YBR056W_5UTR_0	YBR056W_5UTR	chrII	347867	+	GGCGCGCCAAAAGTTTTAATAAATTTTATAGATGGATAGAGAGTCTTTTTTAAAGCAACTCTTCCCAACAGTGTTCGAATTGAAGAAAAGAAAGTTATGTCTTAGTTCATCCATCCCCCCTAATTCCCTTCTTTTAAGCATTTTTTAAGCCA	3	chrII_347777_A_G;chrII_347803_T_A;chrII_347856_T_G	55;81;134	121	0	firstTileUTR	TRUE
firstTileUTR_00367	YBR056W_5UTR_0	YBR056W_5UTR	chrII	347867	+	GGCGCGCCAAAAGTTTTACTAAATTTTATAGATGGATAGAGAGTCTTTTTTAAAGCAACTCTTCCCAACAGAGTTCGAATTGAAGAAAAGAAAGTTATGTCTTAGTTCATCCATCCCCCCTAATTCCCTTCTTTTAAGCATTTTTTAAGCCA	3	chrII_347777_A_G;chrII_347803_T_A;chrII_347856_T_G	55;81;134	112	0	firstTileUTR	TRUE
firstTileUTR_00368	YBR056W_5UTR_0	YBR056W_5UTR	chrII	347867	+	GGCGCGCCAAAAGTTTTACTAAATTTTATAGATGGATAGAGAGTCTTTTTTAAAGCAACTCTTCCCAACAGTGTTCGAATTGAAGAAAAGAAAGTTACGTCTTAGTTCATCCATCCCCCCTAATTCCCTTCTTTTAAGCATTTTTTAAGCCA	3	chrII_347777_A_G;chrII_347803_T_A;chrII_347856_T_G	55;81;134	222	0	firstTileUTR	TRUE
firstTileUTR_00369	YBR059C_5UTR_0	YBR059C_5UTR	chrII	360337	-	GGCGCGCCAATGCTATTGAATTTACTCATTCAAGAAAGGGGGTTCATAGGATTATGGCTTTTATTCAGTATTTTTAAGTTTTTTCGGTTATTGAGCTCTGAATAGGGCATTTTCAGAATGGCGGGGTTCACCTAAAAAAAATGAAAAACAAA	1	chrII_360477_A_C	5	1	0	firstTileUTR	TRUE
firstTileUTR_00370	YBR059C_5UTR_0	YBR059C_5UTR	chrII	360337	-	GGCGCGCCAATGCTATTGAATTTACTCATTCAAGAAAGGGGGTTCATAGGATTATGGCTTTTATTCAGTATTTTTAAGTTTTTTCGGTTATTGAGCTCTGAATAGGGCATTTTCAGAATGGCGGGGTTCACCTAAAAAAAATGAAAACCAAA	1	chrII_360477_A_C	5	2	0	firstTileUTR	TRUE
firstTileUTR_00371	YBR060C_5UTR_0	YBR060C_5UTR	chrII	362606	-	GGCGCGCCATTCTACTTTGTCTTAATTTAAAGGTGGTTCCTATTTCTTTATAACTTTTACACATTGTGAAGAATAACAATTCTGCTTACTATTGTCATTTCCACCTCAATGATGCGGTGAGTGGGTGTTCTGAAAAATTTTCCCGATTTTGC	4	chrII_362638_C_T;chrII_362688_T_G;chrII_362702_C_T;chrII_362748_T_C	113;63;49;3	1111	0	firstTileUTR	TRUE
firstTileUTR_00372	YBR060C_5UTR_0	YBR060C_5UTR	chrII	362606	-	GGCGCGCCATTCTACTTTGTCTTAATTTAAAGGTGGTTCTTATTTCTTTATAACTTTTACACATTGTGAAGAATAACAATTCTGCTTACTATTGTCATTTCCACCTCAATGATGCGGTGAGTGGGTGTTCTGAAAAATTTTCCCGATTTTGC	4	chrII_362638_C_T;chrII_362688_T_G;chrII_362702_C_T;chrII_362748_T_C	113;63;49;3	2111	0	firstTileUTR	TRUE
firstTileUTR_00373	YBR060C_5UTR_0	YBR060C_5UTR	chrII	362606	-	GGCGCGCCATTCTACTTTGTCTTAATTTAAAGGTGGTTCCTATTTCTTTATAACTTTTACACATTGTGAAGAATAACAATTCTGCTTACGATTGTCATTTCCACCTCAATGATGCGGTGAGTGGGTGTTCTGAAAAATTTTCCCGATTTTGC	4	chrII_362638_C_T;chrII_362688_T_G;chrII_362702_C_T;chrII_362748_T_C	113;63;49;3	1211	0	firstTileUTR	TRUE
firstTileUTR_00374	YBR060C_5UTR_0	YBR060C_5UTR	chrII	362606	-	GGCGCGCCATTCTACTTTGTCTTAATTTAAAGGTGGTTCCTATTTCTTTATAACTTTTACACATTGTGAAGAATAACAATTCTGCTTACTATTGTCATTTCCATCTCAATGATGCGGTGAGTGGGTGTTCTGAAAAATTTTCCCGATTTTGC	4	chrII_362638_C_T;chrII_362688_T_G;chrII_362702_C_T;chrII_362748_T_C	113;63;49;3	1121	0	firstTileUTR	TRUE
firstTileUTR_00375	YBR060C_5UTR_0	YBR060C_5UTR	chrII	362606	-	GGCGCGCCATTCTACTTTGTCTTAATTTAAAGGTGGTTCCTATTTCTTTATAACTTTTACACATTGTGAAGAATAACAATTCTGCTTACTATTGTCATTTCCACCTCAATGATGCGGTGAGTGGGTGTTCTGAAAAATTTTCCCGATTTCGC	4	chrII_362638_C_T;chrII_362688_T_G;chrII_362702_C_T;chrII_362748_T_C	113;63;49;3	1112	0	firstTileUTR	TRUE
firstTileUTR_00376	YBR060C_5UTR_0	YBR060C_5UTR	chrII	362606	-	GGCGCGCCATTCTACTTTGTCTTAATTTAAAGGTGGTTCTTATTTCTTTATAACTTTTACACATTGTGAAGAATAACAATTCTGCTTACGATTGTCATTTCCATCTCAATGATGCGGTGAGTGGGTGTTCTGAAAAATTTTCCCGATTTCGC	4	chrII_362638_C_T;chrII_362688_T_G;chrII_362702_C_T;chrII_362748_T_C	113;63;49;3	2222	0	firstTileUTR	TRUE
firstTileUTR_00377	YBR061C_5UTR_0	YBR061C_5UTR	chrII	365726	-	GGCGCGCCACTTTCTTTTTAAGCTTGCCTTGTACTCATCTACTGTTGTTTTACAGTAATGTTAGGAGCATCGCTTGAAAATTTTCAACTCGCGATAATTATTGTTAGCGCAGAATAATAATACCTAGTAAAAAGTTTATCGTTGCTTTTACT	2	chrII_365830_G_A;chrII_365863_C_T	41;8	11	0	firstTileUTR	TRUE
firstTileUTR_00378	YBR061C_5UTR_0	YBR061C_5UTR	chrII	365726	-	GGCGCGCCACTTTCTTTTTAAGCTTGCCTTGTACTCATCTACTGTTGTTTTACAGTAATGTTAGGAGCATCGCTTGAAAATTTTCAACTCGCGATAATTATTGTTAGCGCAAAATAATAATACCTAGTAAAAAGTTTATCGTTGCTTTTACT	2	chrII_365830_G_A;chrII_365863_C_T	41;8	21	0	firstTileUTR	TRUE
firstTileUTR_00379	YBR061C_5UTR_0	YBR061C_5UTR	chrII	365726	-	GGCGCGCCACTTTCTTTTTAAGCTTGCCTTGTACTCATCTACTGTTGTTTTACAGTAATGTTAGGAGCATCGCTTGAAAATTTTCAACTCGCGATAATTATTGTTAGCGCAGAATAATAATACCTAGTAAAAAGTTTATCGTTGTTTTTACT	2	chrII_365830_G_A;chrII_365863_C_T	41;8	12	0	firstTileUTR	TRUE
firstTileUTR_00380	YBR061C_5UTR_0	YBR061C_5UTR	chrII	365726	-	GGCGCGCCACTTTCTTTTTAAGCTTGCCTTGTACTCATCTACTGTTGTTTTACAGTAATGTTAGGAGCATCGCTTGAAAATTTTCAACTCGCGATAATTATTGTTAGCGCAAAATAATAATACCTAGTAAAAAGTTTATCGTTGTTTTTACT	2	chrII_365830_G_A;chrII_365863_C_T	41;8	22	0	firstTileUTR	TRUE
firstTileUTR_00381	YBR065C_5UTR_0	YBR065C_5UTR	chrII	369720	-	GGCGCGCCATTCACCTGCTCAAAAGCCCTTCCATCATCATTACCACTTCTATCAATAAAATTTGCCATAGCATTTCTTTTTTTTTTTTTTAGTCCTTATTGCCTAAACGTCATCACAGGAGAGGGTAATCCCGGAATGAATAAGGTTTGAAA	3	chrII_369788_CT_CTT;chrII_369831_G_C;chrII_369847_A_C	77;34;18	111	0	firstTileUTR	TRUE
firstTileUTR_00382	YBR065C_5UTR_0	YBR065C_5UTR	chrII	369720	-	GGCGCGCCATTCACCTGCTCAAAAGCCCTTCCATCATCATTACCACTTCTATCAATAAAATTTGCCATAGCATTTCTTTTTTTTTTTTTTTAGTCCTTATTGCCTAAACGTCATCACAGGAGAGGGTAATCCCGGAATGAATAAGGTTTGAAA	3	chrII_369788_CT_CTT;chrII_369831_G_C;chrII_369847_A_C	77;34;18	211	0	firstTileUTR	TRUE
firstTileUTR_00383	YBR065C_5UTR_0	YBR065C_5UTR	chrII	369720	-	GGCGCGCCATTCACCTGCTCAAAAGCCCTTCCATCATCATTACCACTTCTATCAATAAAATTTGCCATAGCATTTCTTTTTTTTTTTTTTAGTCCTTATTGCCTAAACGTCATCACAGCAGAGGGTAATCCCGGAATGAATAAGGTTTGAAA	3	chrII_369788_CT_CTT;chrII_369831_G_C;chrII_369847_A_C	77;34;18	121	0	firstTileUTR	TRUE
firstTileUTR_00384	YBR065C_5UTR_0	YBR065C_5UTR	chrII	369720	-	GGCGCGCCATTCACCTGCTCAAAAGCCCTTCCATCATCATTACCACTTCTATCAATAAAATTTGCCATAGCATTTCTTTTTTTTTTTTTTAGTCCTTATTGCCTAAACGTCATCACAGGAGAGGGTAATCCCGGCATGAATAAGGTTTGAAA	3	chrII_369788_CT_CTT;chrII_369831_G_C;chrII_369847_A_C	77;34;18	112	0	firstTileUTR	TRUE
firstTileUTR_00385	YBR065C_5UTR_0	YBR065C_5UTR	chrII	369720	-	GGCGCGCCATTCACCTGCTCAAAAGCCCTTCCATCATCATTACCACTTCTATCAATAAAATTTGCCATAGCATTTCTTTTTTTTTTTTTTTAGTCCTTATTGCCTAAACGTCATCACAGCAGAGGGTAATCCCGGCATGAATAAGGTTTGAAA	3	chrII_369788_CT_CTT;chrII_369831_G_C;chrII_369847_A_C	77;34;18	222	0	firstTileUTR	TRUE
firstTileUTR_00386	YBR067C_5UTR_0	YBR067C_5UTR	chrII	372786	-	GGCGCGCCGATTGAATGCCTTTATAATTTCGGTCCGAACAAAGTTAGGCAAGCGAGAATAATTGACGTTTGAAAGAGGGCTGCCAATGTACTATTTATATTAAATGGTGAATGAAGCAACGCAGTACCTCAAAGAGGTTGGAGACATATTCA	2	chrII_372845_G_A;chrII_372919_G_A	86;12	11	0	firstTileUTR	FALSE
firstTileUTR_00387	YBR067C_5UTR_0	YBR067C_5UTR	chrII	372786	-	GGCGCGCCGATTGAATGCCTTTATAATTTCGGTCCGAACAAAGTTAGGCAAGCGAGAATAATTGACATTTGAAAGAGGGCTGCCAATGTACTATTTATATTAAATGGTGAATGAAGCAACGCAGTACCTCAAAGAGGTTGGAGACATATTCA	2	chrII_372845_G_A;chrII_372919_G_A	86;12	21	0	firstTileUTR	FALSE
firstTileUTR_00388	YBR067C_5UTR_0	YBR067C_5UTR	chrII	372786	-	GGCGCGCCGATTGAATGCCTTTATAATTTCGGTCCGAACAAAGTTAGGCAAGCGAGAATAATTGACGTTTGAAAGAGGGCTGCCAATGTACTATTTATATTAAATGGTGAATGAAGCAACGCAGTACCTCAAAGAGGTTGAAGACATATTCA	2	chrII_372845_G_A;chrII_372919_G_A	86;12	12	0	firstTileUTR	FALSE
firstTileUTR_00389	YBR067C_5UTR_0	YBR067C_5UTR	chrII	372786	-	GGCGCGCCGATTGAATGCCTTTATAATTTCGGTCCGAACAAAGTTAGGCAAGCGAGAATAATTGACATTTGAAAGAGGGCTGCCAATGTACTATTTATATTAAATGGTGAATGAAGCAACGCAGTACCTCAAAGAGGTTGAAGACATATTCA	2	chrII_372845_G_A;chrII_372919_G_A	86;12	22	0	firstTileUTR	FALSE
firstTileUTR_00390	YBR068C_5UTR_0	YBR068C_5UTR	chrII	375729	-	GGCGCGCCGATAGTATCGAAAAAGGACCTTCGTTTCAACACTAGCTAGAGATAGTAATAATCTAATGGCAAAATAGCCATTATACGTACCTAATATATACGTATATATACGAGGAGATGTGCTCATCAAAGAAGTGGCATTTCACCCTGAAA	1	chrII_375801_T_C	73	1	0	firstTileUTR	FALSE
firstTileUTR_00391	YBR068C_5UTR_0	YBR068C_5UTR	chrII	375729	-	GGCGCGCCGATAGTATCGAAAAAGGACCTTCGTTTCAACACTAGCTAGAGATAGTAATAATCTAATGGCAAAATAGCCACTATACGTACCTAATATATACGTATATATACGAGGAGATGTGCTCATCAAAGAAGTGGCATTTCACCCTGAAA	1	chrII_375801_T_C	73	2	0	firstTileUTR	FALSE
firstTileUTR_00392	YBR070C_5UTR_0	YBR070C_5UTR	chrII	379955	-	GGCGCGCCGACTTTCCTGATACAATAATAAACCGCCGATTACAGTTATTGCGGGCCCTTGTACATGAAATATTAGGATGGCTTCGCTAAGAACATTTTTGCTTCTGGACAGACAGAACACGTAAAAAAAGAAACACGAAATTACGACTAACT	1	chrII_379969_C_T	131	1	0	firstTileUTR	FALSE
firstTileUTR_00393	YBR070C_5UTR_0	YBR070C_5UTR	chrII	379955	-	GGCGCGCCGACTTTCCTGATATAATAATAAACCGCCGATTACAGTTATTGCGGGCCCTTGTACATGAAATATTAGGATGGCTTCGCTAAGAACATTTTTGCTTCTGGACAGACAGAACACGTAAAAAAAGAAACACGAAATTACGACTAACT	1	chrII_379969_C_T	131	2	0	firstTileUTR	FALSE
firstTileUTR_00394	YBR072W_5UTR_0	YBR072W_5UTR	chrII	381956	+	GGCGCGCCGGTTTTATTAGTATAAGAGAGTAGAATGAAAGGTGAATGGATTAAAAACAGATCTCTAACTAATGGAGGTCCTATTTATATGTTTAGGAATAAGGGTGAAAAAGAACCGTTGTTATGAAATACCACTCAAGAACGTGCATAGAT	1	chrII_381922_A_G	111	1	0	firstTileUTR	FALSE
firstTileUTR_00395	YBR072W_5UTR_0	YBR072W_5UTR	chrII	381956	+	GGCGCGCCGGTTTTATTAGTATAAGAGAGTAGAATGAAAGGCGAATGGATTAAAAACAGATCTCTAACTAATGGAGGTCCTATTTATATGTTTAGGAATAAGGGTGAAAAAGAACCGTTGTTATGAAATACCACTCAAGAACGTGCATAGAT	1	chrII_381922_A_G	111	2	0	firstTileUTR	FALSE
firstTileUTR_00396	YBR074W_5UTR_0	YBR074W_5UTR	chrII	386281	+	GGCGCGCCGATTCTTTAACTTTACCTATCAATTTATTTCCTTGTAGATAATTTTTCACATTATTTTTTTTTTTTTTTTTTTGGGACTAAAGGCTATTCAAATCTTTCAGATGTTTGATTTGCGCCCGCAGCGTATCGTTATCAAATTAGTGA	1	chrII_386202_A_G	66	1	0	firstTileUTR	TRUE
firstTileUTR_00397	YBR074W_5UTR_0	YBR074W_5UTR	chrII	386281	+	GGCGCGCCGATTCTTTAACTTTACCTATCAATTTATTTCCTTGTAGATAATTTTTCACATTATTTTTTTTTTTTTTTTTTTGGGACCAAAGGCTATTCAAATCTTTCAGATGTTTGATTTGCGCCCGCAGCGTATCGTTATCAAATTAGTGA	1	chrII_386202_A_G	66	2	0	firstTileUTR	TRUE
firstTileUTR_00398	YBR078W_5UTR_0	YBR078W_5UTR	chrII	392947	+	GGCGCGCCGATGTTCTAAAAAGAAGAGAAAGGGTGAAAAGCCAAGAAAGATAAAGAAGGAAAGAAAATGCAGAGGAAAGATCTTCACATATTAAATACAAAAATGCAAGAGAGGTCCGTTGATTGCGAAAAGTCGTAGGTG	1	chrII_392874_A_ATCTTTCCTCTGCATTT	61	1	0	firstTileUTR	FALSE
firstTileUTR_00399	YBR078W_5UTR_0	YBR078W_5UTR	chrII	392947	+	GGCGCGCCGATGTTCTAAAAAGAAGAGAAAGGGTGAAAAGCCAAGAAAGATAAAGAAGGAAAGAAAATGCAGAGGAAAGAAAATGCAGAGGAAAGATCTTCACATATTAAATACAAAAATGCAAGAGAGGTCCGTTGATTGCGAAAAGTCGTAGGTG	1	chrII_392874_A_ATCTTTCCTCTGCATTT	61	2	0	firstTileUTR	FALSE
firstTileUTR_00400	YBR079C_5UTR_0	YBR079C_5UTR	chrII	398302	-	GGCGCGCCGGTTTATTTTGGAACTCTCTCTATAGTTGTAAGTATATCTACTTTCGATTTAGTTCACCAAGAAAAATTTTTCACCTGGCAAAGCTTCTCGGGCAAAGCGACTGAAAAATTATCATCTTTACCCGGTGGGTGATAATTATGACA	2	chrII_398314_G_A;chrII_398429_T_G	133;18	11	0	firstTileUTR	TRUE
firstTileUTR_00401	YBR079C_5UTR_0	YBR079C_5UTR	chrII	398302	-	GGCGCGCCGGTTTATTTTGAAACTCTCTCTATAGTTGTAAGTATATCTACTTTCGATTTAGTTCACCAAGAAAAATTTTTCACCTGGCAAAGCTTCTCGGGCAAAGCGACTGAAAAATTATCATCTTTACCCGGTGGGTGATAATTATGACA	2	chrII_398314_G_A;chrII_398429_T_G	133;18	21	0	firstTileUTR	TRUE
firstTileUTR_00402	YBR079C_5UTR_0	YBR079C_5UTR	chrII	398302	-	GGCGCGCCGGTTTATTTTGGAACTCTCTCTATAGTTGTAAGTATATCTACTTTCGATTTAGTTCACCAAGAAAAATTTTTCACCTGGCAAAGCTTCTCGGGCAAAGCGACTGAAAAATTATCATCTTTACCCGGGGGGTGATAATTATGACA	2	chrII_398314_G_A;chrII_398429_T_G	133;18	12	0	firstTileUTR	TRUE
firstTileUTR_00403	YBR079C_5UTR_0	YBR079C_5UTR	chrII	398302	-	GGCGCGCCGGTTTATTTTGAAACTCTCTCTATAGTTGTAAGTATATCTACTTTCGATTTAGTTCACCAAGAAAAATTTTTCACCTGGCAAAGCTTCTCGGGCAAAGCGACTGAAAAATTATCATCTTTACCCGGGGGGTGATAATTATGACA	2	chrII_398314_G_A;chrII_398429_T_G	133;18	22	0	firstTileUTR	TRUE
firstTileUTR_00404	YBR083W_5UTR_0	YBR083W_5UTR	chrII	408894	+	GGCGCGCCAGGTGCTTTTTAACTGTGCATGAGCCAAGAGCCTTGTGAGGGACCATTCGTGGAGTCCAGCTCAGCTTGTTTCCGGAGAGTTTCCCAGAATAATAAGCAAACGCAATCTGAAACACGCACATTCCCGAATTCAATGGGAAATTC	2	chrII_408801_T_C;chrII_408838_A_G	52;89	11	0	firstTileUTR	FALSE
firstTileUTR_00405	YBR083W_5UTR_0	YBR083W_5UTR	chrII	408894	+	GGCGCGCCAGGTGCTTTTTAACTGTGCATGAGCCAAGAGCCTTGTGAGGGACCATTCGTGGAGTCCAGCTCAGCTTGTTTCCGGAGAGTTTCCCAGAATAGTAAGCAAACGCAATCTGAAACACGCACATTCCCGAATTCAATGGGAAATTC	2	chrII_408801_T_C;chrII_408838_A_G	52;89	21	0	firstTileUTR	FALSE
firstTileUTR_00406	YBR083W_5UTR_0	YBR083W_5UTR	chrII	408894	+	GGCGCGCCAGGTGCTTTTTAACTGTGCATGAGCCAAGAGCCTTGTGAGGGACCATTCGTGGAGCCCAGCTCAGCTTGTTTCCGGAGAGTTTCCCAGAATAATAAGCAAACGCAATCTGAAACACGCACATTCCCGAATTCAATGGGAAATTC	2	chrII_408801_T_C;chrII_408838_A_G	52;89	12	0	firstTileUTR	FALSE
firstTileUTR_00407	YBR083W_5UTR_0	YBR083W_5UTR	chrII	408894	+	GGCGCGCCAGGTGCTTTTTAACTGTGCATGAGCCAAGAGCCTTGTGAGGGACCATTCGTGGAGCCCAGCTCAGCTTGTTTCCGGAGAGTTTCCCAGAATAGTAAGCAAACGCAATCTGAAACACGCACATTCCCGAATTCAATGGGAAATTC	2	chrII_408801_T_C;chrII_408838_A_G	52;89	22	0	firstTileUTR	FALSE
firstTileUTR_00408	YBR084W_5UTR_0	YBR084W_5UTR	chrII	411040	+	GGCGCGCCAAATATCTGACAAATGAACAGACTGAGAGAATCACAGTAATGAAAGTTGTTTTTTGATGTGTATTGGCTGGTTTACTTCTGCAATTCTTGAGGCATCGAGAACCGCTGCAACATTATTTCGGAGGAAAAAGAAAAAAAATCGCT	4	chrII_410961_G_A;chrII_410985_A_G;chrII_410998_C_T;chrII_411003_C_T	66;90;103;108	1111	0	firstTileUTR	FALSE
firstTileUTR_00409	YBR084W_5UTR_0	YBR084W_5UTR	chrII	411040	+	GGCGCGCCAAATATCTGACAAATGAACAGACTGAGAGAATCACAGTAATGAAAGTTGTTTTTTGATGTGTATTGGCTGGTTTACTTTTGCAATTCTTGAGGCATCGAGAACCGCTGCAACATTATTTCGGAGGAAAAAGAAAAAAAATCGCT	4	chrII_410961_G_A;chrII_410985_A_G;chrII_410998_C_T;chrII_411003_C_T	66;90;103;108	2111	0	firstTileUTR	FALSE
firstTileUTR_00410	YBR084W_5UTR_0	YBR084W_5UTR	chrII	411040	+	GGCGCGCCAAATATCTGACAAATGAACAGACTGAGAGAATCACAGTAATGAAAGTTGTTTTTCGATGTGTATTGGCTGGTTTACTTCTGCAATTCTTGAGGCATCGAGAACCGCTGCAACATTATTTCGGAGGAAAAAGAAAAAAAATCGCT	4	chrII_410961_G_A;chrII_410985_A_G;chrII_410998_C_T;chrII_411003_C_T	66;90;103;108	1211	0	firstTileUTR	FALSE
firstTileUTR_00411	YBR084W_5UTR_0	YBR084W_5UTR	chrII	411040	+	GGCGCGCCAAATATCTGACAAATGAACAGACTGAGAGAATCACAGTAATAAAAGTTGTTTTTTGATGTGTATTGGCTGGTTTACTTCTGCAATTCTTGAGGCATCGAGAACCGCTGCAACATTATTTCGGAGGAAAAAGAAAAAAAATCGCT	4	chrII_410961_G_A;chrII_410985_A_G;chrII_410998_C_T;chrII_411003_C_T	66;90;103;108	1121	0	firstTileUTR	FALSE
firstTileUTR_00412	YBR084W_5UTR_0	YBR084W_5UTR	chrII	411040	+	GGCGCGCCAAATATCTGACAAATGAACAGACTGAGAGAATCACAATAATGAAAGTTGTTTTTTGATGTGTATTGGCTGGTTTACTTCTGCAATTCTTGAGGCATCGAGAACCGCTGCAACATTATTTCGGAGGAAAAAGAAAAAAAATCGCT	4	chrII_410961_G_A;chrII_410985_A_G;chrII_410998_C_T;chrII_411003_C_T	66;90;103;108	1112	0	firstTileUTR	FALSE
firstTileUTR_00413	YBR084W_5UTR_0	YBR084W_5UTR	chrII	411040	+	GGCGCGCCAAATATCTGACAAATGAACAGACTGAGAGAATCACAATAATAAAAGTTGTTTTTCGATGTGTATTGGCTGGTTTACTTTTGCAATTCTTGAGGCATCGAGAACCGCTGCAACATTATTTCGGAGGAAAAAGAAAAAAAATCGCT	4	chrII_410961_G_A;chrII_410985_A_G;chrII_410998_C_T;chrII_411003_C_T	66;90;103;108	2222	0	firstTileUTR	FALSE
firstTileUTR_00414	YBR084C-A_5UTR_0	YBR084C-A_5UTR	chrII	415283	-	GGCGCGCCAACTTTCTATGTGAAGCGTAAAATCAATAGTTACCTTGTATTCTCTGTTGATCACTGTCCAAACCTATATTTTTGTTTCCCCCTCAGAGAAGTTAGGTCGATGCCTATCGTAGTTTGCAAGGAAGACGGCTTCCAACTGAGACC	1	chrII_415314_T_A	114	1	0	firstTileUTR	TRUE
firstTileUTR_00415	YBR084C-A_5UTR_0	YBR084C-A_5UTR	chrII	415283	-	GGCGCGCCAACTTTCTATGTGAAGCGTAAAATCAATAGATACCTTGTATTCTCTGTTGATCACTGTCCAAACCTATATTTTTGTTTCCCCCTCAGAGAAGTTAGGTCGATGCCTATCGTAGTTTGCAAGGAAGACGGCTTCCAACTGAGACC	1	chrII_415314_T_A	114	2	0	firstTileUTR	TRUE
firstTileUTR_00416	YBR085W_5UTR_0	YBR085W_5UTR	chrII	415908	+	GGCGCGCCAGTCTTTCTATCTGAAATCATTCAAGCGCACTTTAGATTCACTTCAACGCCTAATGAAAAGGACAATGGAAAACCCTTCTCGAGAAATCTTATATGTAATTTGAAGGCAACCAAACAATGAAAAAGAAAAAAAAAAAAAAAAAG	3	chrII_415846_C_T;chrII_415863_G_C;chrII_415869_A_C	83;100;106	111	0	firstTileUTR	FALSE
firstTileUTR_00417	YBR085W_5UTR_0	YBR085W_5UTR	chrII	415908	+	GGCGCGCCAGTCTTTCTATCTGAAATCATTCAAGCGCACTTTAGATTCACTTCAACGCCTAATGAAAAGAACAATGGAAAACCCTTCTCGAGAAATCTTATATGTAATTTGAAGGCAACCAAACAATGAAAAAGAAAAAAAAAAAAAAAAAG	3	chrII_415846_C_T;chrII_415863_G_C;chrII_415869_A_C	83;100;106	211	0	firstTileUTR	FALSE
firstTileUTR_00418	YBR085W_5UTR_0	YBR085W_5UTR	chrII	415908	+	GGCGCGCCAGTCTTTCTATCTGAAATCATTCAAGCGCACTTTAGATTCACTTGAACGCCTAATGAAAAGGACAATGGAAAACCCTTCTCGAGAAATCTTATATGTAATTTGAAGGCAACCAAACAATGAAAAAGAAAAAAAAAAAAAAAAAG	3	chrII_415846_C_T;chrII_415863_G_C;chrII_415869_A_C	83;100;106	121	0	firstTileUTR	FALSE
firstTileUTR_00419	YBR085W_5UTR_0	YBR085W_5UTR	chrII	415908	+	GGCGCGCCAGTCTTTCTATCTGAAATCATTCAAGCGCACTTTAGATGCACTTCAACGCCTAATGAAAAGGACAATGGAAAACCCTTCTCGAGAAATCTTATATGTAATTTGAAGGCAACCAAACAATGAAAAAGAAAAAAAAAAAAAAAAAG	3	chrII_415846_C_T;chrII_415863_G_C;chrII_415869_A_C	83;100;106	112	0	firstTileUTR	FALSE
firstTileUTR_00420	YBR085W_5UTR_0	YBR085W_5UTR	chrII	415908	+	GGCGCGCCAGTCTTTCTATCTGAAATCATTCAAGCGCACTTTAGATGCACTTGAACGCCTAATGAAAAGAACAATGGAAAACCCTTCTCGAGAAATCTTATATGTAATTTGAAGGCAACCAAACAATGAAAAAGAAAAAAAAAAAAAAAAAG	3	chrII_415846_C_T;chrII_415863_G_C;chrII_415869_A_C	83;100;106	222	0	firstTileUTR	FALSE
firstTileUTR_00421	YBR085C-A_5UTR_0	YBR085C-A_5UTR	chrII	419193	-	GGCGCGCCGGTAACTTGAGCCCCTATCGAATGAAGAGTGCGCCGCTTTCCCTTATACAAACTGGAGCCGCAAGTCCTTTGTCCCTTTTATAATAATGAGATGATCCGGTGATAACTACTTATTGCCAGAAAAAGCCCAGATCAGATAATTAA	2	chrII_419197_A_G;chrII_419204_G_A	141;134	11	0	firstTileUTR	FALSE
firstTileUTR_00422	YBR085C-A_5UTR_0	YBR085C-A_5UTR	chrII	419193	-	GGCGCGCCGGTGACTTGAGCCCCTATCGAATGAAGAGTGCGCCGCTTTCCCTTATACAAACTGGAGCCGCAAGTCCTTTGTCCCTTTTATAATAATGAGATGATCCGGTGATAACTACTTATTGCCAGAAAAAGCCCAGATCAGATAATTAA	2	chrII_419197_A_G;chrII_419204_G_A	141;134	21	0	firstTileUTR	FALSE
firstTileUTR_00423	YBR085C-A_5UTR_0	YBR085C-A_5UTR	chrII	419193	-	GGCGCGCCGGTAACTTGAACCCCTATCGAATGAAGAGTGCGCCGCTTTCCCTTATACAAACTGGAGCCGCAAGTCCTTTGTCCCTTTTATAATAATGAGATGATCCGGTGATAACTACTTATTGCCAGAAAAAGCCCAGATCAGATAATTAA	2	chrII_419197_A_G;chrII_419204_G_A	141;134	12	0	firstTileUTR	FALSE
firstTileUTR_00424	YBR085C-A_5UTR_0	YBR085C-A_5UTR	chrII	419193	-	GGCGCGCCGGTGACTTGAACCCCTATCGAATGAAGAGTGCGCCGCTTTCCCTTATACAAACTGGAGCCGCAAGTCCTTTGTCCCTTTTATAATAATGAGATGATCCGGTGATAACTACTTATTGCCAGAAAAAGCCCAGATCAGATAATTAA	2	chrII_419197_A_G;chrII_419204_G_A	141;134	22	0	firstTileUTR	FALSE
firstTileUTR_00425	YBR086C_5UTR_0	YBR086C_5UTR	chrII	423332	-	GGCGCGCCACAGTCTTTCACACTGATGTAGTGGTGGAATCTTTTTGTTTTGAAAACAACAGAGAAAAAAAAAAGATAAAAAAAAGTGCCCTTGTTTGTTTTCGTCCCTAGAAGGAAAAAAAAAGAGAAGTTTCTCGCAGAGTGAAAAAAAAT	3	chrII_423351_G_A;chrII_423387_G_GGAA;chrII_423438_GA_G	126;90;39	111	0	firstTileUTR	FALSE
firstTileUTR_00426	YBR086C_5UTR_0	YBR086C_5UTR	chrII	423332	-	GGCGCGCCACAGTCTTTCACACTGATATAGTGGTGGAATCTTTTTGTTTTGAAAACAACAGAGAAAAAAAAAAGATAAAAAAAAGTGCCCTTGTTTGTTTTCGTCCCTAGAAGGAAAAAAAAAGAGAAGTTTCTCGCAGAGTGAAAAAAAAT	3	chrII_423351_G_A;chrII_423387_G_GGAA;chrII_423438_GA_G	126;90;39	211	0	firstTileUTR	FALSE
firstTileUTR_00427	YBR086C_5UTR_0	YBR086C_5UTR	chrII	423332	-	GGCGCGCCACAGTCTTTCACACTGATGTAGTGGTGGAATCTTTTTGTTTTGAAAACAACAGAGGAAAAAAAAAAAAGATAAAAAAAAGTGCCCTTGTTTGTTTTCGTCCCTAGAAGGAAAAAAAAAGAGAAGTTTCTCGCAGAGTGAAAAAAAAT	3	chrII_423351_G_A;chrII_423387_G_GGAA;chrII_423438_GA_G	126;90;39	121	0	firstTileUTR	FALSE
firstTileUTR_00428	YBR086C_5UTR_0	YBR086C_5UTR	chrII	423332	-	GGCGCGCCACAGTCTTTCACACTGATGTAGTGGTGGAATCTTTTTGTTTTGAAAACAACAGAGAAAAAAAAAAGATAAAAAAAAGTGCCCTTGTTTGTTTTCGTCCCTAGAAGGAAAAAAAAGAGAAGTTTCTCGCAGAGTGAAAAAAAAT	3	chrII_423351_G_A;chrII_423387_G_GGAA;chrII_423438_GA_G	126;90;39	112	0	firstTileUTR	FALSE
firstTileUTR_00429	YBR086C_5UTR_0	YBR086C_5UTR	chrII	423332	-	GGCGCGCCACAGTCTTTCACACTGATATAGTGGTGGAATCTTTTTGTTTTGAAAACAACAGAGGAAAAAAAAAAAAGATAAAAAAAAGTGCCCTTGTTTGTTTTCGTCCCTAGAAGGAAAAAAAAGAGAAGTTTCTCGCAGAGTGAAAAAAAAT	3	chrII_423351_G_A;chrII_423387_G_GGAA;chrII_423438_GA_G	126;90;39	222	0	firstTileUTR	FALSE
firstTileUTR_00430	YBR087W_5UTR_0	YBR087W_5UTR	chrII	423754	+	GGCGCGCCACTAATCTATAATTTCCATGAACCATCATACAAATGAAAAGTCTATTTTATGTTCCAAGGAATAAAAAATCGCGTTAAAATATTCAAGAGGCGACACCGCAGTGCTTCTAGAAAAGATTCCTCAACACGGTGTACATATGCATA	1	chrII_423698_G_T	89	1	0	firstTileUTR	FALSE
firstTileUTR_00431	YBR087W_5UTR_0	YBR087W_5UTR	chrII	423754	+	GGCGCGCCACTAATCTATAATTTCCATGAACCATCATACAAATGAAAAGTCTATTTTATGTTCAAAGGAATAAAAAATCGCGTTAAAATATTCAAGAGGCGACACCGCAGTGCTTCTAGAAAAGATTCCTCAACACGGTGTACATATGCATA	1	chrII_423698_G_T	89	2	0	firstTileUTR	FALSE
firstTileUTR_00432	YBR091C_5UTR_0	YBR091C_5UTR	chrII	427525	-	GGCGCGCCATCTATTTCAGCAATATAGACTACAATCAACTTTGCTGTTCTTACTTTTTAGTTAACTTTTTTCTTTTCATTCTGCCGCTAATCTACAAACTCGTTACCCTACTAGTACATAAAAGAAGATCAGAATCGATGGGTATTTATTTA	2	chrII_427545_A_G;chrII_427659_GTATT_G	125;11	11	0	firstTileUTR	TRUE
firstTileUTR_00433	YBR091C_5UTR_0	YBR091C_5UTR	chrII	427525	-	GGCGCGCCATCTATTTCAGCAATATAGGCTACAATCAACTTTGCTGTTCTTACTTTTTAGTTAACTTTTTTCTTTTCATTCTGCCGCTAATCTACAAACTCGTTACCCTACTAGTACATAAAAGAAGATCAGAATCGATGGGTATTTATTTA	2	chrII_427545_A_G;chrII_427659_GTATT_G	125;11	21	0	firstTileUTR	TRUE
firstTileUTR_00434	YBR091C_5UTR_0	YBR091C_5UTR	chrII	427525	-	GGCGCGCCATCTATTTCAGCAATATAGACTACAATCAACTTTGCTGTTCTTACTTTTTAGTTAACTTTTTTCTTTTCATTCTGCCGCTAATCTACAAACTCGTTACCCTACTAGTACATAAAAGAAGATCAGAATCGATGGGTATTTA	2	chrII_427545_A_G;chrII_427659_GTATT_G	125;11	12	0	firstTileUTR	TRUE
firstTileUTR_00435	YBR091C_5UTR_0	YBR091C_5UTR	chrII	427525	-	GGCGCGCCATCTATTTCAGCAATATAGGCTACAATCAACTTTGCTGTTCTTACTTTTTAGTTAACTTTTTTCTTTTCATTCTGCCGCTAATCTACAAACTCGTTACCCTACTAGTACATAAAAGAAGATCAGAATCGATGGGTATTTA	2	chrII_427545_A_G;chrII_427659_GTATT_G	125;11	22	0	firstTileUTR	TRUE
firstTileUTR_00436	YBR092C_5UTR_0	YBR092C_5UTR	chrII	429130	-	GGCGCGCCGTAGTATTTTTTTTATGATAATCAAGGCATAATTGACTTCCATCCAGCAAATTTAAGCACTTATATATGTTGCATAGGACTACTCAAAGCTGTTTACTATTTCCCAAACTGGTATTATTTAGTAAATTTCTTTTGAATTTTTTT	2	chrII_429183_T_A;chrII_429199_G_A	92;76	11	0	firstTileUTR	TRUE
firstTileUTR_00437	YBR092C_5UTR_0	YBR092C_5UTR	chrII	429130	-	GGCGCGCCGTAGTATTTTTTTTATGATAATCAAGGCATAATTGACTTCCATCCAGCAAATATAAGCACTTATATATGTTGCATAGGACTACTCAAAGCTGTTTACTATTTCCCAAACTGGTATTATTTAGTAAATTTCTTTTGAATTTTTTT	2	chrII_429183_T_A;chrII_429199_G_A	92;76	21	0	firstTileUTR	TRUE
firstTileUTR_00438	YBR092C_5UTR_0	YBR092C_5UTR	chrII	429130	-	GGCGCGCCGTAGTATTTTTTTTATGATAATCAAGGCATAATTGACTTCCATCCAGCAAATTTAAGCACTTATATATATTGCATAGGACTACTCAAAGCTGTTTACTATTTCCCAAACTGGTATTATTTAGTAAATTTCTTTTGAATTTTTTT	2	chrII_429183_T_A;chrII_429199_G_A	92;76	12	0	firstTileUTR	TRUE
firstTileUTR_00439	YBR092C_5UTR_0	YBR092C_5UTR	chrII	429130	-	GGCGCGCCGTAGTATTTTTTTTATGATAATCAAGGCATAATTGACTTCCATCCAGCAAATATAAGCACTTATATATATTGCATAGGACTACTCAAAGCTGTTTACTATTTCCCAAACTGGTATTATTTAGTAAATTTCTTTTGAATTTTTTT	2	chrII_429183_T_A;chrII_429199_G_A	92;76	22	0	firstTileUTR	TRUE
firstTileUTR_00440	YBR094W_5UTR_0	YBR094W_5UTR	chrII	431970	+	GGCGCGCCACCGTAATTTTCAATTGCTAAATACAATGTTCCTTGGTTATCCCATCGCCAATAATTTTTATTTTTACCACTGTTGAAGAAGCGAAAGAAAAAAAAAGGGAAAATCAAAACATTCCCTGTGCACTAATAGAAGAAAACAAGAGA	2	chrII_431851_C_G;chrII_431912_A_T	26;87	11	0	firstTileUTR	FALSE
firstTileUTR_00441	YBR094W_5UTR_0	YBR094W_5UTR	chrII	431970	+	GGCGCGCCACCGTAATTTTCAATTGCTAAATACAATGTTCCTTGGTTATCCCATCGCCAATAATTTTTATTTTTACCACTGTTGAAGAAGCGAAAGAAAAAAAAAGGGAAAATCAAAACATTCCCTCTGCACTAATAGAAGAAAACAAGAGA	2	chrII_431851_C_G;chrII_431912_A_T	26;87	21	0	firstTileUTR	FALSE
firstTileUTR_00442	YBR094W_5UTR_0	YBR094W_5UTR	chrII	431970	+	GGCGCGCCACCGTAATTTTCAATTGCTAAATACAATGTTCCTTGGTTATCCCATCGCCAATAATTATTATTTTTACCACTGTTGAAGAAGCGAAAGAAAAAAAAAGGGAAAATCAAAACATTCCCTGTGCACTAATAGAAGAAAACAAGAGA	2	chrII_431851_C_G;chrII_431912_A_T	26;87	12	0	firstTileUTR	FALSE
firstTileUTR_00443	YBR094W_5UTR_0	YBR094W_5UTR	chrII	431970	+	GGCGCGCCACCGTAATTTTCAATTGCTAAATACAATGTTCCTTGGTTATCCCATCGCCAATAATTATTATTTTTACCACTGTTGAAGAAGCGAAAGAAAAAAAAAGGGAAAATCAAAACATTCCCTCTGCACTAATAGAAGAAAACAAGAGA	2	chrII_431851_C_G;chrII_431912_A_T	26;87	22	0	firstTileUTR	FALSE
firstTileUTR_00444	YBR095C_5UTR_0	YBR095C_5UTR	chrII	435722	-	GGCGCGCCGAGATATTTGTTTCTCAACCTCTTTTTTGCAGGAGATGCTGTCATCAAGCAACGTTTCTTCTATTTGAAAGCGATTGTTTTACCAGAACAAAGTTCGCTACCCGGCTTCGGTCCTCTTGGGTATAGGAGACAATAATGATCTTC	1	chrII_435843_G_A	24	1	0	firstTileUTR	TRUE
firstTileUTR_00445	YBR095C_5UTR_0	YBR095C_5UTR	chrII	435722	-	GGCGCGCCGAGATATTTGTTTCTCAACCTCTTTTTTGCAGGAGATGCTGTCATCAAGCAACGTTTCTTCTATTTGAAAGCGATTGTTTTACCAGAACAAAGTTCGCTACCCGGCTTCGGTCCTCTTGGATATAGGAGACAATAATGATCTTC	1	chrII_435843_G_A	24	2	0	firstTileUTR	TRUE
firstTileUTR_00446	YBR096W_5UTR_0	YBR096W_5UTR	chrII	435960	+	GGCGCGCCGGAAGTCTTGAAATTAGAAGCAATTGTTTTACAAAATTACTAAAAAGCCTTTAAGCGGATAATTATAATGTTCACTTTATAACGGCGTTATTCGAAGATCATTATTGTCTCCTATACCCAAGAGGACCGAAGCCGGGTAGCGAA	1	chrII_435843_G_A	28	1	0	firstTileUTR	FALSE
firstTileUTR_00447	YBR096W_5UTR_0	YBR096W_5UTR	chrII	435960	+	GGCGCGCCGGAAGTCTTGAAATTAGAAGCAATTGTTTTACAAAATTACTAAAAAGCCTTTAAGCGGATAATTATAATGTTCACTTTATAACGGCGTTATTCGAAGATCATTATTGTCTCCTATATCCAAGAGGACCGAAGCCGGGTAGCGAA	1	chrII_435843_G_A	28	2	0	firstTileUTR	FALSE
firstTileUTR_00448	YBR098W_5UTR_0	YBR098W_5UTR	chrII	441496	+	GGCGCGCCGACTACTATTATTCTATACCATAATCCATACATTGTTCTTTATTTACGTATACAACCATTTTTTTCGTGAAAAGGGTACTTCAACGCGTTGCAAGCCCTTTCCTAAATGATCGAAAATGTTTAAGGTGAATACAAATTTATACG	1	chrII_441419_A_C	68	1	0	firstTileUTR	TRUE
firstTileUTR_00449	YBR098W_5UTR_0	YBR098W_5UTR	chrII	441496	+	GGCGCGCCGACTACTATTATTCTATACCATAATCCATACATTGTTCTTTATTTACGTATACAACCATTTTTTTCGTGAAAAGGGGACTTCAACGCGTTGCAAGCCCTTTCCTAAATGATCGAAAATGTTTAAGGTGAATACAAATTTATACG	1	chrII_441419_A_C	68	2	0	firstTileUTR	TRUE
firstTileUTR_00450	YBR103W_5UTR_0	YBR103W_5UTR	chrII	447543	+	GGCGCGCCGCATATCTCATAACCTTTTCAACATGAATACATTCCTAATCATTTTTGTTTATTTCTCGTTTGCTAAGTTCCGCTCCATGAAAATAGATGACTGGAAAAAGAGACTAGAGACTGCAGTTAATAGTATATTTGTAAGACCTTGAG	1	chrII_447536_G_T	138	1	0	firstTileUTR	TRUE
firstTileUTR_00451	YBR103W_5UTR_0	YBR103W_5UTR	chrII	447543	+	GGCGCGCCGCATATATCATAACCTTTTCAACATGAATACATTCCTAATCATTTTTGTTTATTTCTCGTTTGCTAAGTTCCGCTCCATGAAAATAGATGACTGGAAAAAGAGACTAGAGACTGCAGTTAATAGTATATTTGTAAGACCTTGAG	1	chrII_447536_G_T	138	2	0	firstTileUTR	TRUE
firstTileUTR_00452	YBR104W_5UTR_0	YBR104W_5UTR	chrII	449579	+	GGCGCGCCATCCAAGAGGTGAAAACTAATTAAAGAAACTTATTTTAACACAAGGTATAAAAAATTATAAAAAAGCAATGCTCATTGTCTTCTCTCATCGCGAGCGGCCGTTATCTTCAAAGTGATGACTCTTCGAGATTCCTGCACAACGTC	1	chrII_449537_G_T	103	1	0	firstTileUTR	FALSE
firstTileUTR_00453	YBR104W_5UTR_0	YBR104W_5UTR	chrII	449579	+	GGCGCGCCATCCAAGAGGTGAAAACTAATTAAAGAAACTTATTTTAACAAAAGGTATAAAAAATTATAAAAAAGCAATGCTCATTGTCTTCTCTCATCGCGAGCGGCCGTTATCTTCAAAGTGATGACTCTTCGAGATTCCTGCACAACGTC	1	chrII_449537_G_T	103	2	0	firstTileUTR	FALSE
firstTileUTR_00454	YBR106W_5UTR_0	YBR106W_5UTR	chrII	452625	+	GGCGCGCCACTGTTATAGTTTCTAGCTTCTAATGTAAGATAACAGTGAGCGTTCTTATATGTATATCGAATGAAAGAGCAAGGCAACTACATTTTATAAGCGTTTCGGTTTTGGCGCGTTTGGCCACCGGCCGCCAAAAAAGAAAGAAAAAG	1	chrII_452575_ATAAG_A	95	1	0	firstTileUTR	FALSE
firstTileUTR_00455	YBR106W_5UTR_0	YBR106W_5UTR	chrII	452625	+	GGCGCGCCACTGTTATAGTTTCTAGCTTCTAATGTAAGATAACAGTGAGCGTTTATGTATATCGAATGAAAGAGCAAGGCAACTACATTTTATAAGCGTTTCGGTTTTGGCGCGTTTGGCCACCGGCCGCCAAAAAAGAAAGAAAAAG	1	chrII_452575_ATAAG_A	95	2	0	firstTileUTR	FALSE
firstTileUTR_00456	YBR107C_5UTR_0	YBR107C_5UTR	chrII	454579	-	GGCGCGCCGCAGTCGACCAGATCATCCCACTATGGTTGTTGTCTATTTCATATCGGTGTCGGCATTTTTTTTTCCCGTAGTACCACTGGATCTGCCTAAATCGCGCTTCAGGAAAACCAGGGACCACCCTATTTTTTTATATTTCATCATCT	3	chrII_454587_A_G;chrII_454598_C_T;chrII_454635_A_ATT	137;126;89	111	0	firstTileUTR	TRUE
firstTileUTR_00457	YBR107C_5UTR_0	YBR107C_5UTR	chrII	454579	-	GGCGCGCCGCAGTCGGCCAGATCATCCCACTATGGTTGTTGTCTATTTCATATCGGTGTCGGCATTTTTTTTTCCCGTAGTACCACTGGATCTGCCTAAATCGCGCTTCAGGAAAACCAGGGACCACCCTATTTTTTTATATTTCATCATCT	3	chrII_454587_A_G;chrII_454598_C_T;chrII_454635_A_ATT	137;126;89	211	0	firstTileUTR	TRUE
firstTileUTR_00458	YBR107C_5UTR_0	YBR107C_5UTR	chrII	454579	-	GGCGCGCCGCAGTCGACCAGATCATCTCACTATGGTTGTTGTCTATTTCATATCGGTGTCGGCATTTTTTTTTCCCGTAGTACCACTGGATCTGCCTAAATCGCGCTTCAGGAAAACCAGGGACCACCCTATTTTTTTATATTTCATCATCT	3	chrII_454587_A_G;chrII_454598_C_T;chrII_454635_A_ATT	137;126;89	121	0	firstTileUTR	TRUE
firstTileUTR_00459	YBR107C_5UTR_0	YBR107C_5UTR	chrII	454579	-	GGCGCGCCGCAGTCGACCAGATCATCCCACTATGGTTGTTGTCTATTTCATATCGGTGTCGGCATTTTTTTTTTTCCCGTAGTACCACTGGATCTGCCTAAATCGCGCTTCAGGAAAACCAGGGACCACCCTATTTTTTTATATTTCATCATCT	3	chrII_454587_A_G;chrII_454598_C_T;chrII_454635_A_ATT	137;126;89	112	0	firstTileUTR	TRUE
firstTileUTR_00460	YBR107C_5UTR_0	YBR107C_5UTR	chrII	454579	-	GGCGCGCCGCAGTCGGCCAGATCATCTCACTATGGTTGTTGTCTATTTCATATCGGTGTCGGCATTTTTTTTTTTCCCGTAGTACCACTGGATCTGCCTAAATCGCGCTTCAGGAAAACCAGGGACCACCCTATTTTTTTATATTTCATCATCT	3	chrII_454587_A_G;chrII_454598_C_T;chrII_454635_A_ATT	137;126;89	222	0	firstTileUTR	TRUE
firstTileUTR_00461	YBR108W_5UTR_0	YBR108W_5UTR	chrII	454770	+	GGCGCGCCATGTAAACTCAAAATGACTTTATCCATATATGTATACACTTAATTTAGATGATGAAATATAAAAAAATAGGGTGGTCCCTGGTTTTCCTGAAGCGCGATTTAGGCAGATCCAGTGGTACTACGGGAAAAAAAAATGCCGACACC	2	chrII_454635_A_ATT;chrII_454753_T_C	10;128	11	0	firstTileUTR	FALSE
firstTileUTR_00462	YBR108W_5UTR_0	YBR108W_5UTR	chrII	454770	+	GGCGCGCCATGTAAACTCAAAATGACTTTATCCATATATGTATACACTTAATTTAGATGATGAAATATAAAAAAATAGGGTGGTCCCTGGTTTTCCTGAAGCGCGATTTAGGCAGATCCAGTGGTACTACGGGAAAAAAAAAAATGCCGACACC	2	chrII_454635_A_ATT;chrII_454753_T_C	10;128	21	0	firstTileUTR	FALSE
firstTileUTR_00463	YBR108W_5UTR_0	YBR108W_5UTR	chrII	454770	+	GGCGCGCCATGTAAACTCAAAATGGCTTTATCCATATATGTATACACTTAATTTAGATGATGAAATATAAAAAAATAGGGTGGTCCCTGGTTTTCCTGAAGCGCGATTTAGGCAGATCCAGTGGTACTACGGGAAAAAAAAATGCCGACACC	2	chrII_454635_A_ATT;chrII_454753_T_C	10;128	12	0	firstTileUTR	FALSE
firstTileUTR_00464	YBR108W_5UTR_0	YBR108W_5UTR	chrII	454770	+	GGCGCGCCATGTAAACTCAAAATGGCTTTATCCATATATGTATACACTTAATTTAGATGATGAAATATAAAAAAATAGGGTGGTCCCTGGTTTTCCTGAAGCGCGATTTAGGCAGATCCAGTGGTACTACGGGAAAAAAAAAAATGCCGACACC	2	chrII_454635_A_ATT;chrII_454753_T_C	10;128	22	0	firstTileUTR	FALSE
firstTileUTR_00465	YBR110W_5UTR_0	YBR110W_5UTR	chrII	458837	+	GGCGCGCCACAATTACCCTCTAATGGCTTTGCTAATTGCTGATTGAAAGATATATGACCAATTAACTTGATGATTGCTATATGCGCGTTCTATTGAAGCAACGTGCAAGATGATCACTGCTTGGATTGACCTTGTTTTAGCAACAAGCCATA	3	chrII_458748_T_C;chrII_458800_C_T;chrII_458813_G_C	56;108;121	111	0	firstTileUTR	TRUE
firstTileUTR_00466	YBR110W_5UTR_0	YBR110W_5UTR	chrII	458837	+	GGCGCGCCACAATTACCCTCTAATGGCTTTGCTAATTGCTGATTGAAAGATATATGACCAATTAACTTGATGATTGCTATATGCGCGTTCTATTGAGGCAACGTGCAAGATGATCACTGCTTGGATTGACCTTGTTTTAGCAACAAGCCATA	3	chrII_458748_T_C;chrII_458800_C_T;chrII_458813_G_C	56;108;121	211	0	firstTileUTR	TRUE
firstTileUTR_00467	YBR110W_5UTR_0	YBR110W_5UTR	chrII	458837	+	GGCGCGCCACAATTACCCTCTAATGGCTTTGCTAATTGCTGATTAAAAGATATATGACCAATTAACTTGATGATTGCTATATGCGCGTTCTATTGAAGCAACGTGCAAGATGATCACTGCTTGGATTGACCTTGTTTTAGCAACAAGCCATA	3	chrII_458748_T_C;chrII_458800_C_T;chrII_458813_G_C	56;108;121	121	0	firstTileUTR	TRUE
firstTileUTR_00468	YBR110W_5UTR_0	YBR110W_5UTR	chrII	458837	+	GGCGCGCCACAATTACCCTCTAATGGCTTTGGTAATTGCTGATTGAAAGATATATGACCAATTAACTTGATGATTGCTATATGCGCGTTCTATTGAAGCAACGTGCAAGATGATCACTGCTTGGATTGACCTTGTTTTAGCAACAAGCCATA	3	chrII_458748_T_C;chrII_458800_C_T;chrII_458813_G_C	56;108;121	112	0	firstTileUTR	TRUE
firstTileUTR_00469	YBR110W_5UTR_0	YBR110W_5UTR	chrII	458837	+	GGCGCGCCACAATTACCCTCTAATGGCTTTGGTAATTGCTGATTAAAAGATATATGACCAATTAACTTGATGATTGCTATATGCGCGTTCTATTGAGGCAACGTGCAAGATGATCACTGCTTGGATTGACCTTGTTTTAGCAACAAGCCATA	3	chrII_458748_T_C;chrII_458800_C_T;chrII_458813_G_C	56;108;121	222	0	firstTileUTR	TRUE
firstTileUTR_00470	YBR111C_5UTR_0	YBR111C_5UTR	chrII	461881	-	GGCGCGCCGAGAAGGAAGGAAAATGCCGAAAGAATAATCATAAAAGCATATATACGTGATTCATATGAAGGCTGTCTGACGTTGTATTAAACCGCTAACGGCCGTACTTGCCATCCCTTACGGAAGTGTATTCGCTTGCCGGACCTCTTCCT	1	chrII_461887_G_C	139	1	0	firstTileUTR	FALSE
firstTileUTR_00471	YBR111C_5UTR_0	YBR111C_5UTR	chrII	461881	-	GGCGCGCCGAGAACGAAGGAAAATGCCGAAAGAATAATCATAAAAGCATATATACGTGATTCATATGAAGGCTGTCTGACGTTGTATTAAACCGCTAACGGCCGTACTTGCCATCCCTTACGGAAGTGTATTCGCTTGCCGGACCTCTTCCT	1	chrII_461887_G_C	139	2	0	firstTileUTR	FALSE
firstTileUTR_00472	YBR112C_5UTR_0	YBR112C_5UTR	chrII	465945	-	GGCGCGCCGATTCTAGTTCTCTCAATTGAACTCCTGACGTGGTTTGTAAAAAAACAGAGAACAGGAAACAAAAAACAAAAAGACAAAGAAAAAAATGCGCTTTTGCTTTGATAATCGGAAGGGAAAAGAACGACCGACCGAAGAAAAGAAAA	1	chrII_465979_G_A	111	1	0	firstTileUTR	FALSE
firstTileUTR_00473	YBR112C_5UTR_0	YBR112C_5UTR	chrII	465945	-	GGCGCGCCGATTCTAGTTCTCTCAATTGAACTCCTGACGTGATTTGTAAAAAAACAGAGAACAGGAAACAAAAAACAAAAAGACAAAGAAAAAAATGCGCTTTTGCTTTGATAATCGGAAGGGAAAAGAACGACCGACCGAAGAAAAGAAAA	1	chrII_465979_G_A	111	2	0	firstTileUTR	FALSE
firstTileUTR_00474	YBR114W_5UTR_0	YBR114W_5UTR	chrII	467160	+	GGCGCGCCGTCGTTATACTGTCGGTTTTATTAGTCCTTAAGGTCCTATCTGTGCATTTTTTTTATAGCGTTAATCCGAAACTTGAAAAAAAAAAGAAAAGGGAAATGAAAAGGGAAGAAAAAGAAACGGAGGCGCAGGAGGAAGGAGGGGGG	1	chrII_467073_CT_C	58	1	0	firstTileUTR	FALSE
firstTileUTR_00475	YBR114W_5UTR_0	YBR114W_5UTR	chrII	467160	+	GGCGCGCCGTCGTTATACTGTCGGTTTTATTAGTCCTTAAGGTCCTATCTGTGCATTTTTTTTATAGCGTTAATCCGAAACTTGAAAAAAAAAGAAAAGGGAAATGAAAAGGGAAGAAAAAGAAACGGAGGCGCAGGAGGAAGGAGGGGGG	1	chrII_467073_CT_C	58	2	0	firstTileUTR	FALSE
firstTileUTR_00476	YBR119W_5UTR_0	YBR119W_5UTR	chrII	479290	+	GGCGCGCCCCATTTTTTTTTTTTTTGTTTCGAGTAACGTATGGTTTAGTATCTGTCTTCTCCTTCTCTTACAAAAAAACCCTTTGTAAAATAGTGCCGAGTTGGAGGACATCAATCTGATGGGCAAGAAAACACCAACCCCCCCTATATGAA	4	chrII_479153_AG_A;chrII_479201_G_A;chrII_479267_C_T;chrII_479272_CAA_CA	8;56;122;127	1111	0	firstTileUTR	TRUE
firstTileUTR_00477	YBR119W_5UTR_0	YBR119W_5UTR	chrII	479290	+	GGCGCGCCCCATTTTTTTTTTTTTTGTTTCGAGTAACGTATGGTTTAGTATCTGTCTTCTCCTTCTCTTACAAAAAAACCCTTTGTAAAATAGTGCCGAGTTGGAGGACATCAATCTGATGGGCAAGAAAACACCAACCCCCCTATATGAA	4	chrII_479153_AG_A;chrII_479201_G_A;chrII_479267_C_T;chrII_479272_CAA_CA	8;56;122;127	2111	0	firstTileUTR	TRUE
firstTileUTR_00478	YBR119W_5UTR_0	YBR119W_5UTR	chrII	479290	+	GGCGCGCCCCATTTTTTTTTTTTTTGTTTCGAGTAACGTATGGTTTAGTATCTGTCTTCTCCTTCTCTTACAAAAAAACCCTTTGTAAAATAGTGCTGAGTTGGAGGACATCAATCTGATGGGCAAGAAAACACCAACCCCCCCTATATGAA	4	chrII_479153_AG_A;chrII_479201_G_A;chrII_479267_C_T;chrII_479272_CAA_CA	8;56;122;127	1211	0	firstTileUTR	TRUE
firstTileUTR_00479	YBR119W_5UTR_0	YBR119W_5UTR	chrII	479290	+	GGCGCGCCCCATTTTTTTTTTTTTTGTTTCAAGTAACGTATGGTTTAGTATCTGTCTTCTCCTTCTCTTACAAAAAAACCCTTTGTAAAATAGTGCCGAGTTGGAGGACATCAATCTGATGGGCAAGAAAACACCAACCCCCCCTATATGAA	4	chrII_479153_AG_A;chrII_479201_G_A;chrII_479267_C_T;chrII_479272_CAA_CA	8;56;122;127	1121	0	firstTileUTR	TRUE
firstTileUTR_00480	YBR119W_5UTR_0	YBR119W_5UTR	chrII	479290	+	GGCGCGCCCCATTTTTTTTTTTTTGTTTCGAGTAACGTATGGTTTAGTATCTGTCTTCTCCTTCTCTTACAAAAAAACCCTTTGTAAAATAGTGCCGAGTTGGAGGACATCAATCTGATGGGCAAGAAAACACCAACCCCCCCTATATGAA	4	chrII_479153_AG_A;chrII_479201_G_A;chrII_479267_C_T;chrII_479272_CAA_CA	8;56;122;127	1112	0	firstTileUTR	TRUE
firstTileUTR_00481	YBR119W_5UTR_0	YBR119W_5UTR	chrII	479290	+	GGCGCGCCCCATTTTTTTTTTTTTGTTTCAAGTAACGTATGGTTTAGTATCTGTCTTCTCCTTCTCTTACAAAAAAACCCTTTGTAAAATAGTGCTGAGTTGGAGGACATCAATCTGATGGGCAAGAAAACACCAACCCCCCTATATGAA	4	chrII_479153_AG_A;chrII_479201_G_A;chrII_479267_C_T;chrII_479272_CAA_CA	8;56;122;127	2222	0	firstTileUTR	TRUE
firstTileUTR_00482	YBR120C_5UTR_0	YBR120C_5UTR	chrII	481006	-	GGCGCGCCATAATGTTGCTACCACAGGAAATCTTGATATACGTTAATGTTTTGGCCCCTACAAGGCCGGAAATATTTCGCTTTTTCTTGATATCAGAATTTTTCGCATGTCCGACCATGCGCAGAGCTGCTATGAAAGTACTTTAACTATTA	2	chrII_481140_T_C;chrII_481146_T_C	11;5	11	0	firstTileUTR	TRUE
firstTileUTR_00483	YBR120C_5UTR_0	YBR120C_5UTR	chrII	481006	-	GGCGCGCCATAATGTTGCTACCACAGGAAATCTTGATATACGTTAATGTTTTGGCCCCTACAAGGCCGGAAATATTTCGCTTTTTCTTGATATCAGAATTTTTCGCATGTCCGACCATGCGCAGAGCTGCTATGAAAGTACCTTAACTATTA	2	chrII_481140_T_C;chrII_481146_T_C	11;5	21	0	firstTileUTR	TRUE
firstTileUTR_00484	YBR120C_5UTR_0	YBR120C_5UTR	chrII	481006	-	GGCGCGCCATAATGTTGCTACCACAGGAAATCTTGATATACGTTAATGTTTTGGCCCCTACAAGGCCGGAAATATTTCGCTTTTTCTTGATATCAGAATTTTTCGCATGTCCGACCATGCGCAGAGCTGCTATGAAAGTACTTTAACCATTA	2	chrII_481140_T_C;chrII_481146_T_C	11;5	12	0	firstTileUTR	TRUE
firstTileUTR_00485	YBR120C_5UTR_0	YBR120C_5UTR	chrII	481006	-	GGCGCGCCATAATGTTGCTACCACAGGAAATCTTGATATACGTTAATGTTTTGGCCCCTACAAGGCCGGAAATATTTCGCTTTTTCTTGATATCAGAATTTTTCGCATGTCCGACCATGCGCAGAGCTGCTATGAAAGTACCTTAACCATTA	2	chrII_481140_T_C;chrII_481146_T_C	11;5	22	0	firstTileUTR	TRUE
firstTileUTR_00486	YBR122C_5UTR_0	YBR122C_5UTR	chrII	484536	-	GGCGCGCCGGTACCCGTTCTTTCTGGAGGCATTCTTAACTTTTAGGAATAATAATGATACCCTTTCATTTTAGTTATTTGATTTTGATGCATTTTGCACGAGATAATCGCTCTTTACGGTTTGGGGACAAAACTCAGAAATATCACATACGT	4	chrII_484558_C_T;chrII_484574_G_A;chrII_484617_G_A;chrII_484651_G_C	123;107;64;30	1111	0	firstTileUTR	TRUE
firstTileUTR_00487	YBR122C_5UTR_0	YBR122C_5UTR	chrII	484536	-	GGCGCGCCGGTACCCGTTCTTTCTGGAGGTATTCTTAACTTTTAGGAATAATAATGATACCCTTTCATTTTAGTTATTTGATTTTGATGCATTTTGCACGAGATAATCGCTCTTTACGGTTTGGGGACAAAACTCAGAAATATCACATACGT	4	chrII_484558_C_T;chrII_484574_G_A;chrII_484617_G_A;chrII_484651_G_C	123;107;64;30	2111	0	firstTileUTR	TRUE
firstTileUTR_00488	YBR122C_5UTR_0	YBR122C_5UTR	chrII	484536	-	GGCGCGCCGGTACCCGTTCTTTCTGGAGGCATTCTTAACTTTTAGAAATAATAATGATACCCTTTCATTTTAGTTATTTGATTTTGATGCATTTTGCACGAGATAATCGCTCTTTACGGTTTGGGGACAAAACTCAGAAATATCACATACGT	4	chrII_484558_C_T;chrII_484574_G_A;chrII_484617_G_A;chrII_484651_G_C	123;107;64;30	1211	0	firstTileUTR	TRUE
firstTileUTR_00489	YBR122C_5UTR_0	YBR122C_5UTR	chrII	484536	-	GGCGCGCCGGTACCCGTTCTTTCTGGAGGCATTCTTAACTTTTAGGAATAATAATGATACCCTTTCATTTTAGTTATTTGATTTTGATACATTTTGCACGAGATAATCGCTCTTTACGGTTTGGGGACAAAACTCAGAAATATCACATACGT	4	chrII_484558_C_T;chrII_484574_G_A;chrII_484617_G_A;chrII_484651_G_C	123;107;64;30	1121	0	firstTileUTR	TRUE
firstTileUTR_00490	YBR122C_5UTR_0	YBR122C_5UTR	chrII	484536	-	GGCGCGCCGGTACCCGTTCTTTCTGGAGGCATTCTTAACTTTTAGGAATAATAATGATACCCTTTCATTTTAGTTATTTGATTTTGATGCATTTTGCACGAGATAATCGCTCTTTACGGTTTCGGGACAAAACTCAGAAATATCACATACGT	4	chrII_484558_C_T;chrII_484574_G_A;chrII_484617_G_A;chrII_484651_G_C	123;107;64;30	1112	0	firstTileUTR	TRUE
firstTileUTR_00491	YBR122C_5UTR_0	YBR122C_5UTR	chrII	484536	-	GGCGCGCCGGTACCCGTTCTTTCTGGAGGTATTCTTAACTTTTAGAAATAATAATGATACCCTTTCATTTTAGTTATTTGATTTTGATACATTTTGCACGAGATAATCGCTCTTTACGGTTTCGGGACAAAACTCAGAAATATCACATACGT	4	chrII_484558_C_T;chrII_484574_G_A;chrII_484617_G_A;chrII_484651_G_C	123;107;64;30	2222	0	firstTileUTR	TRUE
firstTileUTR_00492	YBR123C_5UTR_0	YBR123C_5UTR	chrII	486754	-	GGCGCGCCGGTATACCTTTTCTGTGTTGTCTTTCAGTTCCTGTCTTTAGGATGTTATTTATCGATCTTTTTCAGAAAGACCAAAAGCGAAGAAGCGAAGAAGAGGACTTCTCTGTACTAAGACCAAATTATGTAAAAGGAAAACTAAACATG	2	chrII_486871_A_G;chrII_486878_G_A	28;21	11	0	firstTileUTR	FALSE
firstTileUTR_00493	YBR123C_5UTR_0	YBR123C_5UTR	chrII	486754	-	GGCGCGCCGGTATACCTTTTCTGTGTTGTCTTTCAGTTCCTGTCTTTAGGATGTTATTTATCGATCTTTTTCAGAAAGACCAAAAGCGAAGAAGCGAAGAAGAGGACTTCTCTGTACTAAGACCGAATTATGTAAAAGGAAAACTAAACATG	2	chrII_486871_A_G;chrII_486878_G_A	28;21	21	0	firstTileUTR	FALSE
firstTileUTR_00494	YBR123C_5UTR_0	YBR123C_5UTR	chrII	486754	-	GGCGCGCCGGTATACCTTTTCTGTGTTGTCTTTCAGTTCCTGTCTTTAGGATGTTATTTATCGATCTTTTTCAGAAAGACCAAAAGCGAAGAAGCGAAGAAGAGGACTTCTCTGTACTAAGACCAAATTATATAAAAGGAAAACTAAACATG	2	chrII_486871_A_G;chrII_486878_G_A	28;21	12	0	firstTileUTR	FALSE
firstTileUTR_00495	YBR123C_5UTR_0	YBR123C_5UTR	chrII	486754	-	GGCGCGCCGGTATACCTTTTCTGTGTTGTCTTTCAGTTCCTGTCTTTAGGATGTTATTTATCGATCTTTTTCAGAAAGACCAAAAGCGAAGAAGCGAAGAAGAGGACTTCTCTGTACTAAGACCGAATTATATAAAAGGAAAACTAAACATG	2	chrII_486871_A_G;chrII_486878_G_A	28;21	22	0	firstTileUTR	FALSE
firstTileUTR_00496	YBR126C_5UTR_0	YBR126C_5UTR	chrII	490499	-	GGCGCGCCGACAAGATAAGACTACCAAGTTAATCAATCTCTACCACCCGGCTGTACGCCTTAATCTCTCTCTATATATACATACTCACAATAATACATGTGTCTTAGAACCTCAGTGCAGTTTGTCCATGGCGCCCCCCTGAGAGCCCCTGC	1	chrII_490619_A_C	25	1	0	firstTileUTR	FALSE
firstTileUTR_00497	YBR126C_5UTR_0	YBR126C_5UTR	chrII	490499	-	GGCGCGCCGACAAGATAAGACTACCAAGTTAATCAATCTCTACCACCCGGCTGTACGCCTTAATCTCTCTCTATATATACATACTCACAATAATACATGTGTCTTAGAACCTCAGTGCAGTTTGTCCCTGGCGCCCCCCTGAGAGCCCCTGC	1	chrII_490619_A_C	25	2	0	firstTileUTR	FALSE
firstTileUTR_00498	YBR133C_5UTR_0	YBR133C_5UTR	chrII	504446	-	GGCGCGCCACCATTTTTTCTATCACACATACACATTGTATAAAGCCATTTGTTTCAAAAAAATATAAAAACACTGCGCAGCGTGCTGTTTCGGGTTCCATTTGTGATTGTTTATTTTTCTTTTGGTTTAGCTCAGTGCAAAACGAGGGCTCG	2	chrII_504500_A_AG;chrII_504587_C_T	91;4	11	0	firstTileUTR	TRUE
firstTileUTR_00499	YBR133C_5UTR_0	YBR133C_5UTR	chrII	504446	-	GGCGCGCCACCATTTTTTCTATCACACATACACATTGTATAAAGCCATTTGTTTCAAAAAAAGTATAAAAACACTGCGCAGCGTGCTGTTTCGGGTTCCATTTGTGATTGTTTATTTTTCTTTTGGTTTAGCTCAGTGCAAAACGAGGGCTCG	2	chrII_504500_A_AG;chrII_504587_C_T	91;4	21	0	firstTileUTR	TRUE
firstTileUTR_00500	YBR133C_5UTR_0	YBR133C_5UTR	chrII	504446	-	GGCGCGCCACCATTTTTTCTATCACACATACACATTGTATAAAGCCATTTGTTTCAAAAAAATATAAAAACACTGCGCAGCGTGCTGTTTCGGGTTCCATTTGTGATTGTTTATTTTTCTTTTGGTTTAGCTCAGTGCAAAACGAGGGTTCG	2	chrII_504500_A_AG;chrII_504587_C_T	91;4	12	0	firstTileUTR	TRUE
firstTileUTR_00501	YBR133C_5UTR_0	YBR133C_5UTR	chrII	504446	-	GGCGCGCCACCATTTTTTCTATCACACATACACATTGTATAAAGCCATTTGTTTCAAAAAAAGTATAAAAACACTGCGCAGCGTGCTGTTTCGGGTTCCATTTGTGATTGTTTATTTTTCTTTTGGTTTAGCTCAGTGCAAAACGAGGGTTCG	2	chrII_504500_A_AG;chrII_504587_C_T	91;4	22	0	firstTileUTR	TRUE
firstTileUTR_00502	YBR135W_5UTR_0	YBR135W_5UTR	chrII	504760	+	GGCGCGCCACTGATGTCTGCTCTACTGCCATCCGCTGTCCTTTCATGCATAAAAGCTCCATTCTTTATTTATCTCATACCACGAGAAAAAAAAATCACCTGACATATTTTTATAACCCGCCTTTTAGACCCTAAAACAGATCTCAGGGCTCG	2	chrII_504739_G_A;chrII_504741_C_T	124;126	11	0	firstTileUTR	TRUE
firstTileUTR_00503	YBR135W_5UTR_0	YBR135W_5UTR	chrII	504760	+	GGCGCGCCACTGATGTCTGCTCTACTGCTATCCGCTGTCCTTTCATGCATAAAAGCTCCATTCTTTATTTATCTCATACCACGAGAAAAAAAAATCACCTGACATATTTTTATAACCCGCCTTTTAGACCCTAAAACAGATCTCAGGGCTCG	2	chrII_504739_G_A;chrII_504741_C_T	124;126	21	0	firstTileUTR	TRUE
firstTileUTR_00504	YBR135W_5UTR_0	YBR135W_5UTR	chrII	504760	+	GGCGCGCCACTGATGTCTGCTCTACTACCATCCGCTGTCCTTTCATGCATAAAAGCTCCATTCTTTATTTATCTCATACCACGAGAAAAAAAAATCACCTGACATATTTTTATAACCCGCCTTTTAGACCCTAAAACAGATCTCAGGGCTCG	2	chrII_504739_G_A;chrII_504741_C_T	124;126	12	0	firstTileUTR	TRUE
firstTileUTR_00505	YBR135W_5UTR_0	YBR135W_5UTR	chrII	504760	+	GGCGCGCCACTGATGTCTGCTCTACTACTATCCGCTGTCCTTTCATGCATAAAAGCTCCATTCTTTATTTATCTCATACCACGAGAAAAAAAAATCACCTGACATATTTTTATAACCCGCCTTTTAGACCCTAAAACAGATCTCAGGGCTCG	2	chrII_504739_G_A;chrII_504741_C_T	124;126	22	0	firstTileUTR	TRUE
firstTileUTR_00506	YBR137W_5UTR_0	YBR137W_5UTR	chrII	512982	+	GGCGCGCCGTTTCTCTTTTGAAATGCGAGATAGTCCTTAATATTATTACGTACGTATATGTTATGTTAACTTATATGGTGTCAACATCCCTGTTAAGAGAGATAGTATGACATGAAGCGGGGATAAGTATCTATTAACTCCGCCGGAGAAAA	1	chrII_512880_T_C	43	1	0	firstTileUTR	TRUE
firstTileUTR_00507	YBR137W_5UTR_0	YBR137W_5UTR	chrII	512982	+	GGCGCGCCGTTTCTCTTTTGAAATGCGAGATAGTCCTTAATATTATTACGTACGTATATGTTATGTTAACTTATATGGTGTCAACATCCCTGTTAAGAGAGATAGTATGGCATGAAGCGGGGATAAGTATCTATTAACTCCGCCGGAGAAAA	1	chrII_512880_T_C	43	2	0	firstTileUTR	TRUE
firstTileUTR_00508	YBR138C_5UTR_0	YBR138C_5UTR	chrII	515366	-	GGCGCGCCGGATCAAGTTTTCGAGACTATTCCAATCTGTGACTTGTTGGATAAATAGTTTTTGACTCGTTTAGTATAATCCTTTTTTCTAAAAGTGCTTAGAGTTCTCTAAGATGTTCTTGTTTACAATGTGAGCGATTTAGGAAATTTCCT	1	chrII_515369_A_G	142	1	0	firstTileUTR	TRUE
firstTileUTR_00509	YBR138C_5UTR_0	YBR138C_5UTR	chrII	515366	-	GGCGCGCCGGGTCAAGTTTTCGAGACTATTCCAATCTGTGACTTGTTGGATAAATAGTTTTTGACTCGTTTAGTATAATCCTTTTTTCTAAAAGTGCTTAGAGTTCTCTAAGATGTTCTTGTTTACAATGTGAGCGATTTAGGAAATTTCCT	1	chrII_515369_A_G	142	2	0	firstTileUTR	TRUE
firstTileUTR_00510	YBR141C_5UTR_0	YBR141C_5UTR	chrII	528049	-	GGCGCGCCAGTGGTATCGCTAAGCTGATACAAGATTGCCATCAAGGTCATGGCTAGCTCATCGATATTATAATTGTTATATTTTTTTTCACCTCACAAACCCGCCTCAAGGTTAGTTAGTCCGTACTTTTCTTTTTCTCTGAAAAACTTTTC	2	chrII_528069_T_C;chrII_528108_T_C	125;86	11	0	firstTileUTR	TRUE
firstTileUTR_00511	YBR141C_5UTR_0	YBR141C_5UTR	chrII	528049	-	GGCGCGCCAGTGGTATCGCTAAGCTGACACAAGATTGCCATCAAGGTCATGGCTAGCTCATCGATATTATAATTGTTATATTTTTTTTCACCTCACAAACCCGCCTCAAGGTTAGTTAGTCCGTACTTTTCTTTTTCTCTGAAAAACTTTTC	2	chrII_528069_T_C;chrII_528108_T_C	125;86	21	0	firstTileUTR	TRUE
firstTileUTR_00512	YBR141C_5UTR_0	YBR141C_5UTR	chrII	528049	-	GGCGCGCCAGTGGTATCGCTAAGCTGATACAAGATTGCCATCAAGGTCATGGCTAGCTCATCGATACTATAATTGTTATATTTTTTTTCACCTCACAAACCCGCCTCAAGGTTAGTTAGTCCGTACTTTTCTTTTTCTCTGAAAAACTTTTC	2	chrII_528069_T_C;chrII_528108_T_C	125;86	12	0	firstTileUTR	TRUE
firstTileUTR_00513	YBR141C_5UTR_0	YBR141C_5UTR	chrII	528049	-	GGCGCGCCAGTGGTATCGCTAAGCTGACACAAGATTGCCATCAAGGTCATGGCTAGCTCATCGATACTATAATTGTTATATTTTTTTTCACCTCACAAACCCGCCTCAAGGTTAGTTAGTCCGTACTTTTCTTTTTCTCTGAAAAACTTTTC	2	chrII_528069_T_C;chrII_528108_T_C	125;86	22	0	firstTileUTR	TRUE
firstTileUTR_00514	YBR143C_5UTR_0	YBR143C_5UTR	chrII	532210	-	GGCGCGCCGTAGTCTTAATAAGGAGACAAGCCGAAATGAATTAAGAAATAAAGGTGTCGTTAAGGCCACACCAACAGTATATCAGTTAAAAATACAGTGATGTATTTCATTGATTTGACGCTTAGCACTGGATTTCTGAAAAAATTTTTCAT	2	chrII_532216_C_T;chrII_532340_G_GA	139;15	11	0	firstTileUTR	FALSE
firstTileUTR_00515	YBR143C_5UTR_0	YBR143C_5UTR	chrII	532210	-	GGCGCGCCGTAGTTTTAATAAGGAGACAAGCCGAAATGAATTAAGAAATAAAGGTGTCGTTAAGGCCACACCAACAGTATATCAGTTAAAAATACAGTGATGTATTTCATTGATTTGACGCTTAGCACTGGATTTCTGAAAAAATTTTTCAT	2	chrII_532216_C_T;chrII_532340_G_GA	139;15	21	0	firstTileUTR	FALSE
firstTileUTR_00516	YBR143C_5UTR_0	YBR143C_5UTR	chrII	532210	-	GGCGCGCCGTAGTCTTAATAAGGAGACAAGCCGAAATGAATTAAGAAATAAAGGTGTCGTTAAGGCCACACCAACAGTATATCAGTTAAAAATACAGTGATGTATTTCATTGATTTGACGCTTAGCACTGGATTTCTGAAAAAAATTTTTCAT	2	chrII_532216_C_T;chrII_532340_G_GA	139;15	12	0	firstTileUTR	FALSE
firstTileUTR_00517	YBR143C_5UTR_0	YBR143C_5UTR	chrII	532210	-	GGCGCGCCGTAGTTTTAATAAGGAGACAAGCCGAAATGAATTAAGAAATAAAGGTGTCGTTAAGGCCACACCAACAGTATATCAGTTAAAAATACAGTGATGTATTTCATTGATTTGACGCTTAGCACTGGATTTCTGAAAAAAATTTTTCAT	2	chrII_532216_C_T;chrII_532340_G_GA	139;15	22	0	firstTileUTR	FALSE
firstTileUTR_00518	YBR145W_5UTR_0	YBR145W_5UTR	chrII	533721	+	GGCGCGCCAGGTATCTTCCAATCAGAGACATTGTGAGACAGTAAAGCAGTAGTTTGCGCTAGAAATATCTTGTAGTCCCTCTTTTATATTCGTAGTATGTTATATAGATTACAATCTAGACAATACGAAGGAACGATCCCGCGTCAGCAGAT	1	chrII_533657_C_T	81	1	0	firstTileUTR	FALSE
firstTileUTR_00519	YBR145W_5UTR_0	YBR145W_5UTR	chrII	533721	+	GGCGCGCCAGGTATCTTCCAATCAGAGACATTGTGAGACAGTAAAGCAGTAGTTTGCGCTAGAAATATCTTATAGTCCCTCTTTTATATTCGTAGTATGTTATATAGATTACAATCTAGACAATACGAAGGAACGATCCCGCGTCAGCAGAT	1	chrII_533657_C_T	81	2	0	firstTileUTR	FALSE
firstTileUTR_00520	YBR146W_5UTR_0	YBR146W_5UTR	chrII	535197	+	GGCGCGCCACTCCTCCTGGTTTCAGTTTCCAGTCGACATTATTAAATTTCTTTTCCGTAAATGGCCTATTTCAGTTTGTCTTACGCACGCAGTTGCTAGTTTTAAATATATCATTTTATACGTAAAGTTCATCTATATATCACATTATATGT	2	chrII_535096_A_T;chrII_535193_G_A	44;141	11	0	firstTileUTR	TRUE
firstTileUTR_00521	YBR146W_5UTR_0	YBR146W_5UTR	chrII	535197	+	GGCGCGCCACTCCTCCTGGTTTCAGTTTCCAGTCGACATTATTAAATTTCTTTTCCGTAAATGGCCTATTTCAGTTTGTCTTACGCACGCAGTTGCTAGTTTTAAATAAATCATTTTATACGTAAAGTTCATCTATATATCACATTATATGT	2	chrII_535096_A_T;chrII_535193_G_A	44;141	21	0	firstTileUTR	TRUE
firstTileUTR_00522	YBR146W_5UTR_0	YBR146W_5UTR	chrII	535197	+	GGCGCGCCACTTCTCCTGGTTTCAGTTTCCAGTCGACATTATTAAATTTCTTTTCCGTAAATGGCCTATTTCAGTTTGTCTTACGCACGCAGTTGCTAGTTTTAAATATATCATTTTATACGTAAAGTTCATCTATATATCACATTATATGT	2	chrII_535096_A_T;chrII_535193_G_A	44;141	12	0	firstTileUTR	TRUE
firstTileUTR_00523	YBR146W_5UTR_0	YBR146W_5UTR	chrII	535197	+	GGCGCGCCACTTCTCCTGGTTTCAGTTTCCAGTCGACATTATTAAATTTCTTTTCCGTAAATGGCCTATTTCAGTTTGTCTTACGCACGCAGTTGCTAGTTTTAAATAAATCATTTTATACGTAAAGTTCATCTATATATCACATTATATGT	2	chrII_535096_A_T;chrII_535193_G_A	44;141	22	0	firstTileUTR	TRUE
firstTileUTR_00524	YBR147W_5UTR_0	YBR147W_5UTR	chrII	536462	+	GGCGCGCCAGTATTTATGGTTTATATTATGACTCTTTTTACATGTAACGGTCATAGTAAAATCTATTCTGATTTGCATCTTATCATCTCCTTCTTTTTTCCAATGGAATTTGAGTCATTGCTGCAAGGCCCCTTTGCTTTGCGGGTGAGAGG	1	chrII_536426_C_A	109	1	0	firstTileUTR	TRUE
firstTileUTR_00525	YBR147W_5UTR_0	YBR147W_5UTR	chrII	536462	+	GGCGCGCCAGTATTTATGGTTTATATTATGACTCTTTTTACATTTAACGGTCATAGTAAAATCTATTCTGATTTGCATCTTATCATCTCCTTCTTTTTTCCAATGGAATTTGAGTCATTGCTGCAAGGCCCCTTTGCTTTGCGGGTGAGAGG	1	chrII_536426_C_A	109	2	0	firstTileUTR	TRUE
firstTileUTR_00526	YBR149W_5UTR_0	YBR149W_5UTR	chrII	539949	+	GGCGCGCCGAAGGCGGAGATAGTGCAAATAAGTCCAGATGCTTGATATCCCCCTCTTTCCTTTTTACCCCTGTATTACGAGGCTCACTTTATATATTATAATTTTTCCAGGCGGAGGTAAGGGTAGAGCGGCTTTTGGTGGATTTATAATCG	4	chrII_539810_A_T;chrII_539825_G_T;chrII_539861_A_G;chrII_539908_G_A	6;21;57;104	1111	0	firstTileUTR	TRUE
firstTileUTR_00527	YBR149W_5UTR_0	YBR149W_5UTR	chrII	539949	+	GGCGCGCCGAAGGCGGAGATAGTGCAAATAAGTCCAGATGCTTGATATCCCCCTCTTTCCTTTTTACCCCTGTATTACGAGGCTCACTTTATATATTATAATTTTTCCAGGCGGAGGTAAGGGTAGAGCGGCTTTTGGTGGATTTAAAATCG	4	chrII_539810_A_T;chrII_539825_G_T;chrII_539861_A_G;chrII_539908_G_A	6;21;57;104	2111	0	firstTileUTR	TRUE
firstTileUTR_00528	YBR149W_5UTR_0	YBR149W_5UTR	chrII	539949	+	GGCGCGCCGAAGGCGGAGATAGTGCAAATAAGTCCAGATGCTTGATATCCCCCTCTTTCCTTTTTACCCCTGTATTACGAGGCTCACTTTATATATTATAATTTTTCCAGGCGGAGGTAAGGGTAGAGCGGATTTTGGTGGATTTATAATCG	4	chrII_539810_A_T;chrII_539825_G_T;chrII_539861_A_G;chrII_539908_G_A	6;21;57;104	1211	0	firstTileUTR	TRUE
firstTileUTR_00529	YBR149W_5UTR_0	YBR149W_5UTR	chrII	539949	+	GGCGCGCCGAAGGCGGAGATAGTGCAAATAAGTCCAGATGCTTGATATCCCCCTCTTTCCTTTTTACCCCTGTATTACGAGGCTCACTTTATATACTATAATTTTTCCAGGCGGAGGTAAGGGTAGAGCGGCTTTTGGTGGATTTATAATCG	4	chrII_539810_A_T;chrII_539825_G_T;chrII_539861_A_G;chrII_539908_G_A	6;21;57;104	1121	0	firstTileUTR	TRUE
firstTileUTR_00530	YBR149W_5UTR_0	YBR149W_5UTR	chrII	539949	+	GGCGCGCCGAAGGCGGAGATAGTGCAAATAAGTCCAGATGCTTGATATTCCCCTCTTTCCTTTTTACCCCTGTATTACGAGGCTCACTTTATATATTATAATTTTTCCAGGCGGAGGTAAGGGTAGAGCGGCTTTTGGTGGATTTATAATCG	4	chrII_539810_A_T;chrII_539825_G_T;chrII_539861_A_G;chrII_539908_G_A	6;21;57;104	1112	0	firstTileUTR	TRUE
firstTileUTR_00531	YBR149W_5UTR_0	YBR149W_5UTR	chrII	539949	+	GGCGCGCCGAAGGCGGAGATAGTGCAAATAAGTCCAGATGCTTGATATTCCCCTCTTTCCTTTTTACCCCTGTATTACGAGGCTCACTTTATATACTATAATTTTTCCAGGCGGAGGTAAGGGTAGAGCGGATTTTGGTGGATTTAAAATCG	4	chrII_539810_A_T;chrII_539825_G_T;chrII_539861_A_G;chrII_539908_G_A	6;21;57;104	2222	0	firstTileUTR	TRUE
firstTileUTR_00532	YBR151W_5UTR_0	YBR151W_5UTR	chrII	544882	+	GGCGCGCCATCATCATATGATCTCAACAATATAAATAGAAGATATCATCAGCGCCAAGAGTGGAACTCTCCCTCTCCTTGCACTTGTTTTAAGAAACTTTTAGCCCTTATTTCCATCTTTATTTCCGCTTTTATTTCCGCAGCACCGGTGAA	1	chrII_544773_G_A	36	1	0	firstTileUTR	TRUE
firstTileUTR_00533	YBR151W_5UTR_0	YBR151W_5UTR	chrII	544882	+	GGCGCGCCATCATCATATGATCTCAACAATATAAATAGAAGATATCATCAGCGCCAAGAGTGGAACTCTCCCTCTCCTTGCACTTGTTTTAAGAAACTTTTAGCCCTTATTTCCATTTTTATTTCCGCTTTTATTTCCGCAGCACCGGTGAA	1	chrII_544773_G_A	36	2	0	firstTileUTR	TRUE
firstTileUTR_00534	YBR154C_5UTR_0	YBR154C_5UTR	chrII	549100	-	GGCGCGCCGACCCTTGTTAGCAACGTTTGTAATCTTCCTCACCGAATTGCGTCGTTTTGAATAATATATATGATTGAAAATTTTTCAAGAGAAAAGAAAAATTTTTCCTTCCGCGGTCAGCCATTGCTAAAAAAAGGCCTCCGTTAGGAGTC	1	chrII_549229_G_A	16	1	0	firstTileUTR	TRUE
firstTileUTR_00535	YBR154C_5UTR_0	YBR154C_5UTR	chrII	549100	-	GGCGCGCCGACCCTTGTTAGCAACGTTTGTAATCTTCCTCACCGAATTGCGTCGTTTTGAATAATATATATGATTGAAAATTTTTCAAGAGAAAAGAAAAATTTTTCCTTCCGCGGTCAGCCATTGCTAAAAAAAGACCTCCGTTAGGAGTC	1	chrII_549229_G_A	16	2	0	firstTileUTR	TRUE
firstTileUTR_00536	YBR155W_5UTR_0	YBR155W_5UTR	chrII	549695	+	GGCGCGCCGCTGCTTTTGAATTTAAGCTCATCGCTCTGAAAAGTGCCGGAAATTACACATATTCTTTTTTTCTTTCTTTTTTTTCCACCTTTTTCCTCACTGCGTTAAGAAAGAGATGAGGTGAAGTTATTTTGTTCTGTGTACTATAATCA	2	chrII_549576_A_G;chrII_549616_TG_T	26;66	11	0	firstTileUTR	TRUE
firstTileUTR_00537	YBR155W_5UTR_0	YBR155W_5UTR	chrII	549695	+	GGCGCGCCGCTGCTTTTGAATTTAAGCTCATCGCTCTGAAAAGTGCCGGAAATTACACATATTCTTTTTTTCTTTCTTTTTTTTCCACCTTTTTCCTCACTGCGTTAAGAAAGAGATGAGGTGAAGCTATTTTGTTCTGTGTACTATAATCA	2	chrII_549576_A_G;chrII_549616_TG_T	26;66	21	0	firstTileUTR	TRUE
firstTileUTR_00538	YBR155W_5UTR_0	YBR155W_5UTR	chrII	549695	+	GGCGCGCCGCTGCTTTTGAATTTAAGCTCATCGCTCTGAAAAGTGCCGGAAATTACACATATTCTTTTTTTCTTTCTTTTTTTTCACCTTTTTCCTCACTGCGTTAAGAAAGAGATGAGGTGAAGTTATTTTGTTCTGTGTACTATAATCA	2	chrII_549576_A_G;chrII_549616_TG_T	26;66	12	0	firstTileUTR	TRUE
firstTileUTR_00539	YBR155W_5UTR_0	YBR155W_5UTR	chrII	549695	+	GGCGCGCCGCTGCTTTTGAATTTAAGCTCATCGCTCTGAAAAGTGCCGGAAATTACACATATTCTTTTTTTCTTTCTTTTTTTTCACCTTTTTCCTCACTGCGTTAAGAAAGAGATGAGGTGAAGCTATTTTGTTCTGTGTACTATAATCA	2	chrII_549576_A_G;chrII_549616_TG_T	26;66	22	0	firstTileUTR	TRUE
firstTileUTR_00540	YBR156C_5UTR_0	YBR156C_5UTR	chrII	553237	-	GGCGCGCCGAGGAGATACTTTGAAACGTTTTGTTTGTATCATTGGCAATACTTGAAACGAGTTTTTGTTTGTTTTCTTTTTTTAGTTAATTCGCGAAATTTAAAATATGAAGATCGGTTTCAGAACAGAATGGATCAGGCTTTTCCGCGTAT	1	chrII_553255_C_T	127	1	0	firstTileUTR	TRUE
firstTileUTR_00541	YBR156C_5UTR_0	YBR156C_5UTR	chrII	553237	-	GGCGCGCCGAGGAGATACTTTGAAATGTTTTGTTTGTATCATTGGCAATACTTGAAACGAGTTTTTGTTTGTTTTCTTTTTTTAGTTAATTCGCGAAATTTAAAATATGAAGATCGGTTTCAGAACAGAATGGATCAGGCTTTTCCGCGTAT	1	chrII_553255_C_T	127	2	0	firstTileUTR	TRUE
firstTileUTR_00542	YBR159W_5UTR_0	YBR159W_5UTR	chrII	558632	+	GGCGCGCCGTGTTTCCTTCAGTCTCTTTTGAAGTTGCATTTCTGCAACGCTTTTATTCGTGAAATCTCTAAAAAAGCGAAAAATAAAAAGGCCTCCCGCGGACTTAAAACAGAACATCCGAAACATTACAAAAGGCCCCTACAATTATCTCT	3	chrII_558567_T_TC;chrII_558576_T_C;chrII_558597_A_C	80;89;110	111	0	firstTileUTR	FALSE
firstTileUTR_00543	YBR159W_5UTR_0	YBR159W_5UTR	chrII	558632	+	GGCGCGCCGTGTTTCCTTCAGTCTCTTTTGAAGTTGCATTTCTGCAACGCTTTTATTCGTGAAATCTCTAAAGAAAGCGAAAAATAAAAAGGCCTCCCGCGGACTTAAAACAGAACATCCGAAACATTACAAAAGGCCCCTACAATTATCTCT	3	chrII_558567_T_TC;chrII_558576_T_C;chrII_558597_A_C	80;89;110	211	0	firstTileUTR	FALSE
firstTileUTR_00544	YBR159W_5UTR_0	YBR159W_5UTR	chrII	558632	+	GGCGCGCCGTGTTTCCTTCAGTCTCTTTTGAAGTTGCATTTCTGCAACGCTTTTATTCGTGAAGTCTCTAAAAAAGCGAAAAATAAAAAGGCCTCCCGCGGACTTAAAACAGAACATCCGAAACATTACAAAAGGCCCCTACAATTATCTCT	3	chrII_558567_T_TC;chrII_558576_T_C;chrII_558597_A_C	80;89;110	121	0	firstTileUTR	FALSE
firstTileUTR_00545	YBR159W_5UTR_0	YBR159W_5UTR	chrII	558632	+	GGCGCGCCGTGTTTCCTTCAGTCTCTTTTGAAGTTGCATTTCGGCAACGCTTTTATTCGTGAAATCTCTAAAAAAGCGAAAAATAAAAAGGCCTCCCGCGGACTTAAAACAGAACATCCGAAACATTACAAAAGGCCCCTACAATTATCTCT	3	chrII_558567_T_TC;chrII_558576_T_C;chrII_558597_A_C	80;89;110	112	0	firstTileUTR	FALSE
firstTileUTR_00546	YBR159W_5UTR_0	YBR159W_5UTR	chrII	558632	+	GGCGCGCCGTGTTTCCTTCAGTCTCTTTTGAAGTTGCATTTCGGCAACGCTTTTATTCGTGAAGTCTCTAAAGAAAGCGAAAAATAAAAAGGCCTCCCGCGGACTTAAAACAGAACATCCGAAACATTACAAAAGGCCCCTACAATTATCTCT	3	chrII_558567_T_TC;chrII_558576_T_C;chrII_558597_A_C	80;89;110	222	0	firstTileUTR	FALSE
firstTileUTR_00547	YBR160W_5UTR_0	YBR160W_5UTR	chrII	560000	+	GGCGCGCCGATATTCTGGAAAAGCAGTATTAAATTTTCTTTCAAGAGGACTTGGTCCTTCCACCAATTTTTTTTTTTGAGTTCTTGTTGTTTTCCAAATTTTTCTCTTTTTTTCTCATTTAGGTTCGTTTTTATTTTTGGCGTTTGTTGCCC	2	chrII_559922_C_G;chrII_559960_C_T	67;105	11	0	firstTileUTR	TRUE
firstTileUTR_00548	YBR160W_5UTR_0	YBR160W_5UTR	chrII	560000	+	GGCGCGCCGATATTCTGGAAAAGCAGTATTAAATTTTCTTTCAAGAGGACTTGGTCCTTCCACCAATTTTTTTTTTTGAGTTCTTCTTGTTTTCCAAATTTTTCTCTTTTTTTCTCATTTAGGTTCGTTTTTATTTTTGGCGTTTGTTGCCC	2	chrII_559922_C_G;chrII_559960_C_T	67;105	21	0	firstTileUTR	TRUE
firstTileUTR_00549	YBR160W_5UTR_0	YBR160W_5UTR	chrII	560000	+	GGCGCGCCGATATTCTGGAAAAGCAGTATTAAATTTTCTTTCAAGAGAACTTGGTCCTTCCACCAATTTTTTTTTTTGAGTTCTTGTTGTTTTCCAAATTTTTCTCTTTTTTTCTCATTTAGGTTCGTTTTTATTTTTGGCGTTTGTTGCCC	2	chrII_559922_C_G;chrII_559960_C_T	67;105	12	0	firstTileUTR	TRUE
firstTileUTR_00550	YBR160W_5UTR_0	YBR160W_5UTR	chrII	560000	+	GGCGCGCCGATATTCTGGAAAAGCAGTATTAAATTTTCTTTCAAGAGAACTTGGTCCTTCCACCAATTTTTTTTTTTGAGTTCTTCTTGTTTTCCAAATTTTTCTCTTTTTTTCTCATTTAGGTTCGTTTTTATTTTTGGCGTTTGTTGCCC	2	chrII_559922_C_G;chrII_559960_C_T	67;105	22	0	firstTileUTR	TRUE
firstTileUTR_00551	YBR161W_5UTR_0	YBR161W_5UTR	chrII	561407	+	GGCGCGCCGCGGAGGTCAAAAACAAGAACAGAGAAAAAAACCAAGGGCGAGTCAGATGCGAAACGGCTTTAAACAAGCGAACTCCTTATAGTCAAAGAAGTTCAATTGAGGCCCCAGCATACAATGCGTTATTTCGTTTTGTTTTTCGTTTG	1	chrII_561291_T_C	29	1	0	firstTileUTR	FALSE
firstTileUTR_00552	YBR161W_5UTR_0	YBR161W_5UTR	chrII	561407	+	GGCGCGCCGCGGAGGTCAAAAACAAGAACAGAGAAAAAAACCAAGGGCGAGTCAGATGCGAAACGGCTTTAAACAAGCGAACTCCTTATAGTCAAAGAAGTTCAATTGAGGCCCCAGCATACAGTGCGTTATTTCGTTTTGTTTTTCGTTTG	1	chrII_561291_T_C	29	2	0	firstTileUTR	FALSE
firstTileUTR_00553	YBR162W-A_5UTR_0	YBR162W-A_5UTR	chrII	565214	+	GGCGCGCCATCTACTTCGACCTCTGCACCCTGCTATTTCTGCATGTAATGCTGTGCTGAAATTATATTTGATATAACGCAAGTAAGCGCAGATGGCGACAAGAAAAAAAGCCACGTCAAGTCATTAGACACGATATCACATACCACGAGATC	1	chrII_565153_A_G	84	1	0	firstTileUTR	FALSE
firstTileUTR_00554	YBR162W-A_5UTR_0	YBR162W-A_5UTR	chrII	565214	+	GGCGCGCCATCTACTTCGACCTCTGCACCCTGCTATTTCTGCATGTAATGCTGTGCTGAAATTATATTCGATATAACGCAAGTAAGCGCAGATGGCGACAAGAAAAAAAGCCACGTCAAGTCATTAGACACGATATCACATACCACGAGATC	1	chrII_565153_A_G	84	2	0	firstTileUTR	FALSE
firstTileUTR_00555	YBR163W_5UTR_0	YBR163W_5UTR	chrII	565621	+	GGCGCGCCACTCATCTTTGTTGCACGTTTGATTGGCATGGTAAATCACAATAGCACTTGAATTACTTCATCTTTTTTCGCATCCATAAATGACAACGCGGGTAATACTGCCTTATGCTTGTTGTTATTATTATTCGAAATCGCTTATTTATT	2	chrII_565493_C_T;chrII_565566_A_G	17;90	11	0	firstTileUTR	TRUE
firstTileUTR_00556	YBR163W_5UTR_0	YBR163W_5UTR	chrII	565621	+	GGCGCGCCACTCATCTTTGTTGCACGTTTGATTGGCATGGTAAATCACAATAGCACTTGAATTACTTCATCTTTTTTCGCATCCATAAATGACAACGCGGGTAATACTGCCTTATGCTTGTTGTTATTATTATTCAAAATCGCTTATTTATT	2	chrII_565493_C_T;chrII_565566_A_G	17;90	21	0	firstTileUTR	TRUE
firstTileUTR_00557	YBR163W_5UTR_0	YBR163W_5UTR	chrII	565621	+	GGCGCGCCACTCATCTTTGTTGCACGTTTGATTGGCATGGTAAATCACAATAGCACTTGAATCACTTCATCTTTTTTCGCATCCATAAATGACAACGCGGGTAATACTGCCTTATGCTTGTTGTTATTATTATTCGAAATCGCTTATTTATT	2	chrII_565493_C_T;chrII_565566_A_G	17;90	12	0	firstTileUTR	TRUE
firstTileUTR_00558	YBR163W_5UTR_0	YBR163W_5UTR	chrII	565621	+	GGCGCGCCACTCATCTTTGTTGCACGTTTGATTGGCATGGTAAATCACAATAGCACTTGAATCACTTCATCTTTTTTCGCATCCATAAATGACAACGCGGGTAATACTGCCTTATGCTTGTTGTTATTATTATTCAAAATCGCTTATTTATT	2	chrII_565493_C_T;chrII_565566_A_G	17;90	22	0	firstTileUTR	TRUE
firstTileUTR_00559	YBR164C_5UTR_0	YBR164C_5UTR	chrII	568545	-	GGCGCGCCACTACTTGAAAGTTCCGAGAACATTCTGCCTAATATTAATTGTCGTAAATCTAACTTTTATAGGCAAAATAGTTTTATTCAAAATTTCAATTGGAAAGGGCTCTGTTACCCGTCCTGTACGATGCAGTGGGTTTTGTTATTGTC	1	chrII_568676_G_C	14	1	0	firstTileUTR	TRUE
firstTileUTR_00560	YBR164C_5UTR_0	YBR164C_5UTR	chrII	568545	-	GGCGCGCCACTACTTGAAAGTTCCGAGAACATTCTGCCTAATATTAATTGTCGTAAATCTAACTTTTATAGGCAAAATAGTTTTATTCAAAATTTCAATTGGAAAGGGCTCTGTTACCCGTCCTGTACGATGCAGTGGCTTTTGTTATTGTC	1	chrII_568676_G_C	14	2	0	firstTileUTR	TRUE
firstTileUTR_00561	YBR165W_5UTR_0	YBR165W_5UTR	chrII	568760	+	GGCGCGCCGATGCTCTCAAAACATACTAAGAATGTGTTCTATGATATATATGGGAAGAGTAGGTTAAATATTTCTTATGACAATAACAAAACCCACTGCATCGTACAGGACGGGTAACAGAGCCCTTTCCAATTGAAATTTTGAATAAAACT	1	chrII_568676_G_C	61	1	0	firstTileUTR	FALSE
firstTileUTR_00562	YBR165W_5UTR_0	YBR165W_5UTR	chrII	568760	+	GGCGCGCCGATGCTCTCAAAACATACTAAGAATGTGTTCTATGATATATATGGGAAGAGTAGGTTAAATATTTCTTATGACAATAACAAAAGCCACTGCATCGTACAGGACGGGTAACAGAGCCCTTTCCAATTGAAATTTTGAATAAAACT	1	chrII_568676_G_C	61	2	0	firstTileUTR	FALSE
firstTileUTR_00563	YBR166C_5UTR_0	YBR166C_5UTR	chrII	571243	-	GGCGCGCCGGTATTCTTGTAATTCTAAAAACTTTTCTTGGTTTGAATAATTCCAGTATCACTTTCTTCAAAGCTTATTTTCATATAAGGCCTCAAAAAAAAAAAAAAAAAATGACACATAGCTGAAGTGATAAACTTACTACACTGGTATAA	4	chrII_571328_CAA_CAAA;chrII_571347_T_A;chrII_571349_A_G;chrII_571362_G_C	60;41;39;26	1111	0	firstTileUTR	FALSE
firstTileUTR_00564	YBR166C_5UTR_0	YBR166C_5UTR	chrII	571243	-	GGCGCGCCGGTATTCTTGTAATTCTAAAAACTTTTCTTGGTTTGAATAATTCCAGTATCACTTTCTTCAAAGCTTATTTTCATATAAGGCCTCAAAAAAAAAAAAAAAAAAATGACACATAGCTGAAGTGATAAACTTACTACACTGGTATAA	4	chrII_571328_CAA_CAAA;chrII_571347_T_A;chrII_571349_A_G;chrII_571362_G_C	60;41;39;26	2111	0	firstTileUTR	FALSE
firstTileUTR_00565	YBR166C_5UTR_0	YBR166C_5UTR	chrII	571243	-	GGCGCGCCGGTATTCTTGTAATTCTAAAAACTTTTCTTGGTTTGAATAATTCCAGTATCACTTTCTTCAAAGCTTATTTTCATATAAGGCCTCAAAAAAAAAAAAAAAAAAAGACACATAGCTGAAGTGATAAACTTACTACACTGGTATAA	4	chrII_571328_CAA_CAAA;chrII_571347_T_A;chrII_571349_A_G;chrII_571362_G_C	60;41;39;26	1211	0	firstTileUTR	FALSE
firstTileUTR_00566	YBR166C_5UTR_0	YBR166C_5UTR	chrII	571243	-	GGCGCGCCGGTATTCTTGTAATTCTAAAAACTTTTCTTGGTTTGAATAATTCCAGTATCACTTTCTTCAAAGCTTATTTTCATATAAGGCCTCAAAAAAAAAAAAAAAAAATGGCACATAGCTGAAGTGATAAACTTACTACACTGGTATAA	4	chrII_571328_CAA_CAAA;chrII_571347_T_A;chrII_571349_A_G;chrII_571362_G_C	60;41;39;26	1121	0	firstTileUTR	FALSE
firstTileUTR_00567	YBR166C_5UTR_0	YBR166C_5UTR	chrII	571243	-	GGCGCGCCGGTATTCTTGTAATTCTAAAAACTTTTCTTGGTTTGAATAATTCCAGTATCACTTTCTTCAAAGCTTATTTTCATATAAGGCCTCAAAAAAAAAAAAAAAAAATGACACATAGCTGAACTGATAAACTTACTACACTGGTATAA	4	chrII_571328_CAA_CAAA;chrII_571347_T_A;chrII_571349_A_G;chrII_571362_G_C	60;41;39;26	1112	0	firstTileUTR	FALSE
firstTileUTR_00568	YBR166C_5UTR_0	YBR166C_5UTR	chrII	571243	-	GGCGCGCCGGTATTCTTGTAATTCTAAAAACTTTTCTTGGTTTGAATAATTCCAGTATCACTTTCTTCAAAGCTTATTTTCATATAAGGCCTCAAAAAAAAAAAAAAAAAAAAGGCACATAGCTGAACTGATAAACTTACTACACTGGTATAA	4	chrII_571328_CAA_CAAA;chrII_571347_T_A;chrII_571349_A_G;chrII_571362_G_C	60;41;39;26	2222	0	firstTileUTR	FALSE
firstTileUTR_00569	YBR168W_5UTR_0	YBR168W_5UTR	chrII	572244	+	GGCGCGCCGGTGTTCCAGTAATTCTTGGAAATAAGCATAAAAGGGTATTTGTTTCGGGGATAATTTCTTTACTTCCCCACCAGGCTGTTGAATTGAATATGAAAATGGTATGACAACAATAATGTCTAAAATTCCCAAATCAATTTGGTAAA	2	chrII_572114_T_C;chrII_572201_CA_C	15;102	11	0	firstTileUTR	FALSE
firstTileUTR_00570	YBR168W_5UTR_0	YBR168W_5UTR	chrII	572244	+	GGCGCGCCGGTGTTCCAGTAATTCTTGGAAATAAGCATAAAAGGGTATTTGTTTCGGGGATAATTTCTTTACTTCCCCACCAGGCTGTTGAATTGAATATGAAAATGGTATGACAACAATAATGTCTAAAATTCCCAGATCAATTTGGTAAA	2	chrII_572114_T_C;chrII_572201_CA_C	15;102	21	0	firstTileUTR	FALSE
firstTileUTR_00571	YBR168W_5UTR_0	YBR168W_5UTR	chrII	572244	+	GGCGCGCCGGTGTTCCAGTAATTCTTGGAAATAAGCATAAAAGGGTATTGTTTCGGGGATAATTTCTTTACTTCCCCACCAGGCTGTTGAATTGAATATGAAAATGGTATGACAACAATAATGTCTAAAATTCCCAAATCAATTTGGTAAA	2	chrII_572114_T_C;chrII_572201_CA_C	15;102	12	0	firstTileUTR	FALSE
firstTileUTR_00572	YBR168W_5UTR_0	YBR168W_5UTR	chrII	572244	+	GGCGCGCCGGTGTTCCAGTAATTCTTGGAAATAAGCATAAAAGGGTATTGTTTCGGGGATAATTTCTTTACTTCCCCACCAGGCTGTTGAATTGAATATGAAAATGGTATGACAACAATAATGTCTAAAATTCCCAGATCAATTTGGTAAA	2	chrII_572114_T_C;chrII_572201_CA_C	15;102	22	0	firstTileUTR	FALSE
firstTileUTR_00573	YBR169C_5UTR_0	YBR169C_5UTR	chrII	576021	-	GGCGCGCCGTTACAGGTAAAAAAAAAAAAAAAAGGAAGTTTTAAGGGATATTTCCAAAATCTATATACAAGATTTCATAAATAAAAATCTCTAAACGGCAAAGTCCTTTGGTTTATATCAAGAGTACCTTAATATATACCAATTTGTAAAAG	4	chrII_576022_G_A;chrII_576030_TAAAAAA_TAAA;chrII_576057_A_G;chrII_576135_G_A	144;136;109;31	1111	0	firstTileUTR	FALSE
firstTileUTR_00574	YBR169C_5UTR_0	YBR169C_5UTR	chrII	576021	-	GGCGCGCCATTACAGGTAAAAAAAAAAAAAAAAGGAAGTTTTAAGGGATATTTCCAAAATCTATATACAAGATTTCATAAATAAAAATCTCTAAACGGCAAAGTCCTTTGGTTTATATCAAGAGTACCTTAATATATACCAATTTGTAAAAG	4	chrII_576022_G_A;chrII_576030_TAAAAAA_TAAA;chrII_576057_A_G;chrII_576135_G_A	144;136;109;31	2111	0	firstTileUTR	FALSE
firstTileUTR_00575	YBR169C_5UTR_0	YBR169C_5UTR	chrII	576021	-	GGCGCGCCGTTACAGGTAAAAAAAAAAAAAGGAAGTTTTAAGGGATATTTCCAAAATCTATATACAAGATTTCATAAATAAAAATCTCTAAACGGCAAAGTCCTTTGGTTTATATCAAGAGTACCTTAATATATACCAATTTGTAAAAG	4	chrII_576022_G_A;chrII_576030_TAAAAAA_TAAA;chrII_576057_A_G;chrII_576135_G_A	144;136;109;31	1211	0	firstTileUTR	FALSE
firstTileUTR_00576	YBR169C_5UTR_0	YBR169C_5UTR	chrII	576021	-	GGCGCGCCGTTACAGGTAAAAAAAAAAAAAAAAGGAAGTTTTAGGGGATATTTCCAAAATCTATATACAAGATTTCATAAATAAAAATCTCTAAACGGCAAAGTCCTTTGGTTTATATCAAGAGTACCTTAATATATACCAATTTGTAAAAG	4	chrII_576022_G_A;chrII_576030_TAAAAAA_TAAA;chrII_576057_A_G;chrII_576135_G_A	144;136;109;31	1121	0	firstTileUTR	FALSE
firstTileUTR_00577	YBR169C_5UTR_0	YBR169C_5UTR	chrII	576021	-	GGCGCGCCGTTACAGGTAAAAAAAAAAAAAAAAGGAAGTTTTAAGGGATATTTCCAAAATCTATATACAAGATTTCATAAATAAAAATCTCTAAACGGCAAAGTCCTTTGGTTTATATCAAAAGTACCTTAATATATACCAATTTGTAAAAG	4	chrII_576022_G_A;chrII_576030_TAAAAAA_TAAA;chrII_576057_A_G;chrII_576135_G_A	144;136;109;31	1112	0	firstTileUTR	FALSE
firstTileUTR_00578	YBR169C_5UTR_0	YBR169C_5UTR	chrII	576021	-	GGCGCGCCATTACAGGTAAAAAAAAAAAAAGGAAGTTTTAGGGGATATTTCCAAAATCTATATACAAGATTTCATAAATAAAAATCTCTAAACGGCAAAGTCCTTTGGTTTATATCAAAAGTACCTTAATATATACCAATTTGTAAAAG	4	chrII_576022_G_A;chrII_576030_TAAAAAA_TAAA;chrII_576057_A_G;chrII_576135_G_A	144;136;109;31	2222	0	firstTileUTR	FALSE
firstTileUTR_00579	YBR170C_5UTR_0	YBR170C_5UTR	chrII	578136	-	GGCGCGCCAGAGTACTGTCCTATTATTTGCCACTCTTCGTTCTGTATGTTACGAGGGCGTTCCTTAAAATGGGTAGACGCATCTTATTACCCGCCAAAAAACGTCAAAAGTTTTAGGAACACGTCTAAAAGTTGAAATAATATGTGAAAAAA	1	chrII_578174_A_C	107	1	0	firstTileUTR	FALSE
firstTileUTR_00580	YBR170C_5UTR_0	YBR170C_5UTR	chrII	578136	-	GGCGCGCCAGAGTACTGTCCTATTATTTGCCACTCTTCGTTCTGTCTGTTACGAGGGCGTTCCTTAAAATGGGTAGACGCATCTTATTACCCGCCAAAAAACGTCAAAAGTTTTAGGAACACGTCTAAAAGTTGAAATAATATGTGAAAAAA	1	chrII_578174_A_C	107	2	0	firstTileUTR	FALSE
firstTileUTR_00581	YBR172C_5UTR_0	YBR172C_5UTR	chrII	581483	-	GGCGCGCCGGGTATTTGTAGTATTGTGAAAAGTTCCAAAAGGCCCATCAAATCAAATCAACCTATAAGTGGAAATATGAAAAATTTTTTTTTTTTTCAGTGCGACTGAAAAAAAGGCATAGGGTAATTGCGGACTATATAGGACACTAAAAA	4	chrII_581484_G_C;chrII_581510_C_T;chrII_581511_C_T;chrII_581615_A_G	144;118;117;13	1111	0	firstTileUTR	FALSE
firstTileUTR_00582	YBR172C_5UTR_0	YBR172C_5UTR	chrII	581483	-	GGCGCGCCCGGTATTTGTAGTATTGTGAAAAGTTCCAAAAGGCCCATCAAATCAAATCAACCTATAAGTGGAAATATGAAAAATTTTTTTTTTTTTCAGTGCGACTGAAAAAAAGGCATAGGGTAATTGCGGACTATATAGGACACTAAAAA	4	chrII_581484_G_C;chrII_581510_C_T;chrII_581511_C_T;chrII_581615_A_G	144;118;117;13	2111	0	firstTileUTR	FALSE
firstTileUTR_00583	YBR172C_5UTR_0	YBR172C_5UTR	chrII	581483	-	GGCGCGCCGGGTATTTGTAGTATTGTGAAAAGTTTCAAAAGGCCCATCAAATCAAATCAACCTATAAGTGGAAATATGAAAAATTTTTTTTTTTTTCAGTGCGACTGAAAAAAAGGCATAGGGTAATTGCGGACTATATAGGACACTAAAAA	4	chrII_581484_G_C;chrII_581510_C_T;chrII_581511_C_T;chrII_581615_A_G	144;118;117;13	1211	0	firstTileUTR	FALSE
firstTileUTR_00584	YBR172C_5UTR_0	YBR172C_5UTR	chrII	581483	-	GGCGCGCCGGGTATTTGTAGTATTGTGAAAAGTTCTAAAAGGCCCATCAAATCAAATCAACCTATAAGTGGAAATATGAAAAATTTTTTTTTTTTTCAGTGCGACTGAAAAAAAGGCATAGGGTAATTGCGGACTATATAGGACACTAAAAA	4	chrII_581484_G_C;chrII_581510_C_T;chrII_581511_C_T;chrII_581615_A_G	144;118;117;13	1121	0	firstTileUTR	FALSE
firstTileUTR_00585	YBR172C_5UTR_0	YBR172C_5UTR	chrII	581483	-	GGCGCGCCGGGTATTTGTAGTATTGTGAAAAGTTCCAAAAGGCCCATCAAATCAAATCAACCTATAAGTGGAAATATGAAAAATTTTTTTTTTTTTCAGTGCGACTGAAAAAAAGGCATAGGGTAATTGCGGACTATATGGGACACTAAAAA	4	chrII_581484_G_C;chrII_581510_C_T;chrII_581511_C_T;chrII_581615_A_G	144;118;117;13	1112	0	firstTileUTR	FALSE
firstTileUTR_00586	YBR172C_5UTR_0	YBR172C_5UTR	chrII	581483	-	GGCGCGCCCGGTATTTGTAGTATTGTGAAAAGTTTTAAAAGGCCCATCAAATCAAATCAACCTATAAGTGGAAATATGAAAAATTTTTTTTTTTTTCAGTGCGACTGAAAAAAAGGCATAGGGTAATTGCGGACTATATGGGACACTAAAAA	4	chrII_581484_G_C;chrII_581510_C_T;chrII_581511_C_T;chrII_581615_A_G	144;118;117;13	2222	0	firstTileUTR	FALSE
firstTileUTR_00587	YBR173C_5UTR_0	YBR173C_5UTR	chrII	582200	-	GGCGCGCCGTCTATTTAATACTCATTCCCTCTCCAGTGAGCAGGAAACTACATAATATACTTTAATAACCTCAGGTAGGATAAAATTGCCACTGCATGGTTACCCGAGGAGTGAAAAAAGCAAGACCATAAGAAATGCTTGTGCATCACTGG	3	chrII_582226_C_T;chrII_582285_T_C;chrII_582334_T_G	119;60;11	111	0	firstTileUTR	FALSE
firstTileUTR_00588	YBR173C_5UTR_0	YBR173C_5UTR	chrII	582200	-	GGCGCGCCGTCTATTTAATACTCATTCCCTCTCTAGTGAGCAGGAAACTACATAATATACTTTAATAACCTCAGGTAGGATAAAATTGCCACTGCATGGTTACCCGAGGAGTGAAAAAAGCAAGACCATAAGAAATGCTTGTGCATCACTGG	3	chrII_582226_C_T;chrII_582285_T_C;chrII_582334_T_G	119;60;11	211	0	firstTileUTR	FALSE
firstTileUTR_00589	YBR173C_5UTR_0	YBR173C_5UTR	chrII	582200	-	GGCGCGCCGTCTATTTAATACTCATTCCCTCTCCAGTGAGCAGGAAACTACATAATATACTTTAATAACCTCAGGTAGGATAAAATTGCCACCGCATGGTTACCCGAGGAGTGAAAAAAGCAAGACCATAAGAAATGCTTGTGCATCACTGG	3	chrII_582226_C_T;chrII_582285_T_C;chrII_582334_T_G	119;60;11	121	0	firstTileUTR	FALSE
firstTileUTR_00590	YBR173C_5UTR_0	YBR173C_5UTR	chrII	582200	-	GGCGCGCCGTCTATTTAATACTCATTCCCTCTCCAGTGAGCAGGAAACTACATAATATACTTTAATAACCTCAGGTAGGATAAAATTGCCACTGCATGGTTACCCGAGGAGTGAAAAAAGCAAGACCATAAGAAATGCTTGGGCATCACTGG	3	chrII_582226_C_T;chrII_582285_T_C;chrII_582334_T_G	119;60;11	112	0	firstTileUTR	FALSE
firstTileUTR_00591	YBR173C_5UTR_0	YBR173C_5UTR	chrII	582200	-	GGCGCGCCGTCTATTTAATACTCATTCCCTCTCTAGTGAGCAGGAAACTACATAATATACTTTAATAACCTCAGGTAGGATAAAATTGCCACCGCATGGTTACCCGAGGAGTGAAAAAAGCAAGACCATAAGAAATGCTTGGGCATCACTGG	3	chrII_582226_C_T;chrII_582285_T_C;chrII_582334_T_G	119;60;11	222	0	firstTileUTR	FALSE
firstTileUTR_00592	YBR174C_5UTR_0	YBR174C_5UTR	chrII	583410	-	GGCGCGCCATATAGATATATTATAGACGTTTAAAAGTTTTAAGGGATCGGATTTTCAGCCAGATATTTTTTACTTTATTCTAATTTTTTTTTTTATTTTTCACTGCTGCTGTCTTGCGTGATGAGTAAGATATCCTAAAAAACTACTAAGGG	3	chrII_583485_AT_A;chrII_583514_T_C;chrII_583527_GTAAGATATCCTAAAAAACTAC_G	70;41;28	111	0	firstTileUTR	TRUE
firstTileUTR_00593	YBR174C_5UTR_0	YBR174C_5UTR	chrII	583410	-	GGCGCGCCATATAGATATATTATAGACGTTTAAAAGTTTTAAGGGATCGGATTTTCAGCCAGATATTTTTTACTTTATTCTAATTTTTTTTTTATTTTTCACTGCTGCTGTCTTGCGTGATGAGTAAGATATCCTAAAAAACTACTAAGGG	3	chrII_583485_AT_A;chrII_583514_T_C;chrII_583527_GTAAGATATCCTAAAAAACTAC_G	70;41;28	211	0	firstTileUTR	TRUE
firstTileUTR_00594	YBR174C_5UTR_0	YBR174C_5UTR	chrII	583410	-	GGCGCGCCATATAGATATATTATAGACGTTTAAAAGTTTTAAGGGATCGGATTTTCAGCCAGATATTTTTTACTTTATTCTAATTTTTTTTTTTATTTTTCACTGCTGCTGCCTTGCGTGATGAGTAAGATATCCTAAAAAACTACTAAGGG	3	chrII_583485_AT_A;chrII_583514_T_C;chrII_583527_GTAAGATATCCTAAAAAACTAC_G	70;41;28	121	0	firstTileUTR	TRUE
firstTileUTR_00595	YBR174C_5UTR_0	YBR174C_5UTR	chrII	583410	-	GGCGCGCCATATAGATATATTATAGACGTTTAAAAGTTTTAAGGGATCGGATTTTCAGCCAGATATTTTTTACTTTATTCTAATTTTTTTTTTTATTTTTCACTGCTGCTGTCTTGCGTGATGAGTAAGGG	3	chrII_583485_AT_A;chrII_583514_T_C;chrII_583527_GTAAGATATCCTAAAAAACTAC_G	70;41;28	112	0	firstTileUTR	TRUE
firstTileUTR_00596	YBR174C_5UTR_0	YBR174C_5UTR	chrII	583410	-	GGCGCGCCATATAGATATATTATAGACGTTTAAAAGTTTTAAGGGATCGGATTTTCAGCCAGATATTTTTTACTTTATTCTAATTTTTTTTTTATTTTTCACTGCTGCTGCCTTGCGTGATGAGTAAGGG	3	chrII_583485_AT_A;chrII_583514_T_C;chrII_583527_GTAAGATATCCTAAAAAACTAC_G	70;41;28	222	0	firstTileUTR	TRUE
firstTileUTR_00597	YBR176W_5UTR_0	YBR176W_5UTR	chrII	583623	+	GGCGCGCCGTATAGGCTGGTTTAAGGCGCGAGTTCTTCGAGATGTGAACACTTAATGTTGAAAGCTGCCCGAACTTCCCTTAGTAGTTTTTTAGGATATCTTACTCATCACGCAAGACAGCAGCAGTGAAAAATAAAAAAAAAAATTAGAAT	4	chrII_583485_AT_A;chrII_583514_T_C;chrII_583527_GTAAGATATCCTAAAAAACTAC_G;chrII_583576_T_A	7;36;49;98	1111	0	firstTileUTR	FALSE
firstTileUTR_00598	YBR176W_5UTR_0	YBR176W_5UTR	chrII	583623	+	GGCGCGCCGTATAGGCTGGTTTAAGGCGCGAGTTCTTCGAGATGTGAACACTTAATGTTGAAAGCTGCCCGAACTTCCCTTAGTAGTTTTTTAGGATATCTTACTCATCACGCAAGACAGCAGCAGTGAAAAATAAAAAAAAAATTAGAAT	4	chrII_583485_AT_A;chrII_583514_T_C;chrII_583527_GTAAGATATCCTAAAAAACTAC_G;chrII_583576_T_A	7;36;49;98	2111	0	firstTileUTR	FALSE
firstTileUTR_00599	YBR176W_5UTR_0	YBR176W_5UTR	chrII	583623	+	GGCGCGCCGTATAGGCTGGTTTAAGGCGCGAGTTCTTCGAGATGTGAACACTTAATGTTGAAAGCTGCCCGAACTTCCCTTAGTAGTTTTTTAGGATATCTTACTCATCACGCAAGGCAGCAGCAGTGAAAAATAAAAAAAAAAATTAGAAT	4	chrII_583485_AT_A;chrII_583514_T_C;chrII_583527_GTAAGATATCCTAAAAAACTAC_G;chrII_583576_T_A	7;36;49;98	1211	0	firstTileUTR	FALSE
firstTileUTR_00600	YBR176W_5UTR_0	YBR176W_5UTR	chrII	583623	+	GGCGCGCCGTATAGGCTGGTTTAAGGCGCGAGTTCTTCGAGATGTGAACACTTAATGTTGAAAGCTGCCCGAACTTCCCTTACTCATCACGCAAGACAGCAGCAGTGAAAAATAAAAAAAAAAATTAGAAT	4	chrII_583485_AT_A;chrII_583514_T_C;chrII_583527_GTAAGATATCCTAAAAAACTAC_G;chrII_583576_T_A	7;36;49;98	1121	0	firstTileUTR	FALSE
firstTileUTR_00601	YBR176W_5UTR_0	YBR176W_5UTR	chrII	583623	+	GGCGCGCCGTATAGGCTGGTTTAAGGCGCGAGTTCTTCGAGATGTGAACACTTATTGTTGAAAGCTGCCCGAACTTCCCTTAGTAGTTTTTTAGGATATCTTACTCATCACGCAAGACAGCAGCAGTGAAAAATAAAAAAAAAAATTAGAAT	4	chrII_583485_AT_A;chrII_583514_T_C;chrII_583527_GTAAGATATCCTAAAAAACTAC_G;chrII_583576_T_A	7;36;49;98	1112	0	firstTileUTR	FALSE
firstTileUTR_00602	YBR176W_5UTR_0	YBR176W_5UTR	chrII	583623	+	GGCGCGCCGTATAGGCTGGTTTAAGGCGCGAGTTCTTCGAGATGTGAACACTTATTGTTGAAAGCTGCCCGAACTTCCCTTACTCATCACGCAAGGCAGCAGCAGTGAAAAATAAAAAAAAAATTAGAAT	4	chrII_583485_AT_A;chrII_583514_T_C;chrII_583527_GTAAGATATCCTAAAAAACTAC_G;chrII_583576_T_A	7;36;49;98	2222	0	firstTileUTR	FALSE
firstTileUTR_00603	YBR177C_5UTR_0	YBR177C_5UTR	chrII	586184	-	GGCGCGCCGTTTTTTACGCAACTACTATCAATGTAATAATAGAACTTAAAAAACTGCTCATATTAATAATAAACGGAGGAAATACTCGAGGAGCTATTACTTCCAGGGACATCCGATATCTGACGCCTTTTAAAATCTGCACATGCGCAAGA	2	chrII_586221_C_T;chrII_586315_G_C	108;14	11	0	firstTileUTR	FALSE
firstTileUTR_00604	YBR177C_5UTR_0	YBR177C_5UTR	chrII	586184	-	GGCGCGCCGTTTTTTACGCAACTACTATCAATGTAATAATAGAATTTAAAAAACTGCTCATATTAATAATAAACGGAGGAAATACTCGAGGAGCTATTACTTCCAGGGACATCCGATATCTGACGCCTTTTAAAATCTGCACATGCGCAAGA	2	chrII_586221_C_T;chrII_586315_G_C	108;14	21	0	firstTileUTR	FALSE
firstTileUTR_00605	YBR177C_5UTR_0	YBR177C_5UTR	chrII	586184	-	GGCGCGCCGTTTTTTACGCAACTACTATCAATGTAATAATAGAACTTAAAAAACTGCTCATATTAATAATAAACGGAGGAAATACTCGAGGAGCTATTACTTCCAGGGACATCCGATATCTGACGCCTTTTAAAATCTCCACATGCGCAAGA	2	chrII_586221_C_T;chrII_586315_G_C	108;14	12	0	firstTileUTR	FALSE
firstTileUTR_00606	YBR177C_5UTR_0	YBR177C_5UTR	chrII	586184	-	GGCGCGCCGTTTTTTACGCAACTACTATCAATGTAATAATAGAATTTAAAAAACTGCTCATATTAATAATAAACGGAGGAAATACTCGAGGAGCTATTACTTCCAGGGACATCCGATATCTGACGCCTTTTAAAATCTCCACATGCGCAAGA	2	chrII_586221_C_T;chrII_586315_G_C	108;14	22	0	firstTileUTR	FALSE
firstTileUTR_00607	YBR181C_5UTR_0	YBR181C_5UTR	chrII	592803	-	GGCGCGCCAGTTTCAATTAATGACTTCCAAATGTTTTGAAGGGCACACTATTCAAATTAAGATCACTTTTCATAAAGATGAATTTTTCTCCCATCAGGCATTCATTGACCGTGCCCTACAAACCAAGCCAGCCGAGATTGTATCAGCTCCAC	3	chrII_592815_A_T;chrII_592905_C_T;chrII_592938_T_C	133;43;10	111	0	firstTileUTR	FALSE
firstTileUTR_00608	YBR181C_5UTR_0	YBR181C_5UTR	chrII	592803	-	GGCGCGCCAGTTTCAATTATTGACTTCCAAATGTTTTGAAGGGCACACTATTCAAATTAAGATCACTTTTCATAAAGATGAATTTTTCTCCCATCAGGCATTCATTGACCGTGCCCTACAAACCAAGCCAGCCGAGATTGTATCAGCTCCAC	3	chrII_592815_A_T;chrII_592905_C_T;chrII_592938_T_C	133;43;10	211	0	firstTileUTR	FALSE
firstTileUTR_00609	YBR181C_5UTR_0	YBR181C_5UTR	chrII	592803	-	GGCGCGCCAGTTTCAATTAATGACTTCCAAATGTTTTGAAGGGCACACTATTCAAATTAAGATCACTTTTCATAAAGATGAATTTTTCTCCCATCAGGCATTCATTGACTGTGCCCTACAAACCAAGCCAGCCGAGATTGTATCAGCTCCAC	3	chrII_592815_A_T;chrII_592905_C_T;chrII_592938_T_C	133;43;10	121	0	firstTileUTR	FALSE
firstTileUTR_00610	YBR181C_5UTR_0	YBR181C_5UTR	chrII	592803	-	GGCGCGCCAGTTTCAATTAATGACTTCCAAATGTTTTGAAGGGCACACTATTCAAATTAAGATCACTTTTCATAAAGATGAATTTTTCTCCCATCAGGCATTCATTGACCGTGCCCTACAAACCAAGCCAGCCGAGATTGTACCAGCTCCAC	3	chrII_592815_A_T;chrII_592905_C_T;chrII_592938_T_C	133;43;10	112	0	firstTileUTR	FALSE
firstTileUTR_00611	YBR181C_5UTR_0	YBR181C_5UTR	chrII	592803	-	GGCGCGCCAGTTTCAATTATTGACTTCCAAATGTTTTGAAGGGCACACTATTCAAATTAAGATCACTTTTCATAAAGATGAATTTTTCTCCCATCAGGCATTCATTGACTGTGCCCTACAAACCAAGCCAGCCGAGATTGTACCAGCTCCAC	3	chrII_592815_A_T;chrII_592905_C_T;chrII_592938_T_C	133;43;10	222	0	firstTileUTR	FALSE
firstTileUTR_00612	YBR183W_5UTR_0	YBR183W_5UTR	chrII	596018	+	GGCGCGCCATAGATGTATATAGGATATATAGATATATATATGCAAATATCTTTTTCCTATAAGCGATAAAAATAAAATGCTACCCGAATTCTATTTAGACATATATAACCGGAGACAGATATTTTTTATGTCATGGGGTAGAGTAGTGCGTT	1	chrII_595927_T_C	54	1	0	firstTileUTR	FALSE
firstTileUTR_00613	YBR183W_5UTR_0	YBR183W_5UTR	chrII	596018	+	GGCGCGCCATAGATGTATATAGGATATATAGATATATATATGCAAATATCTTTTTCCTATAAGCGATAAAAATAAAATGCTACCCGAATTCTATTTAGGCATATATAACCGGAGACAGATATTTTTTATGTCATGGGGTAGAGTAGTGCGTT	1	chrII_595927_T_C	54	2	0	firstTileUTR	FALSE
firstTileUTR_00614	YBR185C_5UTR_0	YBR185C_5UTR	chrII	599978	-	GGCGCGCCGGATAGGCTTGCTTTCTGATGGAAATTTGCCTTGCTTTTCCAACTATTCCATTACTCAGGTTTTATTTTTTTATTTTGTAATATGGGGAGAAGGCCGGCAGAATATTTACGGACAAATGAATAAATTGGATTGGATTGACTAGT	1	chrII_599979_G_T	144	1	0	firstTileUTR	TRUE
firstTileUTR_00615	YBR185C_5UTR_0	YBR185C_5UTR	chrII	599978	-	GGCGCGCCTGATAGGCTTGCTTTCTGATGGAAATTTGCCTTGCTTTTCCAACTATTCCATTACTCAGGTTTTATTTTTTTATTTTGTAATATGGGGAGAAGGCCGGCAGAATATTTACGGACAAATGAATAAATTGGATTGGATTGACTAGT	1	chrII_599979_G_T	144	2	0	firstTileUTR	TRUE
firstTileUTR_00616	YBR189W_5UTR_0	YBR189W_5UTR	chrII	604482	+	GGCGCGCCGCTTTCTTTCTTGTCTATGCAAATGAACAATTTTATTAAGTAAACTTCATGAAATTTATGCATAATGCTTAATGGGATTGAATGTTAAGCTACATGAGTGAAGCGCGTCCACCTGAAGCCGCCAACTTTATGATTTTTTCAAGT	1	chrII_604449_A_G	112	1	0	firstTileUTR	TRUE
firstTileUTR_00617	YBR189W_5UTR_0	YBR189W_5UTR	chrII	604482	+	GGCGCGCCGCTTTCTTTCTTGTCTATGCAAATGAACAATTCTATTAAGTAAACTTCATGAAATTTATGCATAATGCTTAATGGGATTGAATGTTAAGCTACATGAGTGAAGCGCGTCCACCTGAAGCCGCCAACTTTATGATTTTTTCAAGT	1	chrII_604449_A_G	112	2	0	firstTileUTR	TRUE
firstTileUTR_00618	YBR193C_5UTR_0	YBR193C_5UTR	chrII	609794	-	GGCGCGCCGGGGTTCTCTTATATCGATGAAATATTTCAATATTAAAATCCTTAACTTTGACGAAAAGGCAATTTTTGTATATTGAGTTTCCTTACTTTTTTGAACAGAACGTACTTTTAGACACTTTGCAAAGGCCTTCAGCAAATTTTTTT	1	chrII_609798_G_T	141	1	0	firstTileUTR	TRUE
firstTileUTR_00619	YBR193C_5UTR_0	YBR193C_5UTR	chrII	609794	-	GGCGCGCCGGGTTTCTCTTATATCGATGAAATATTTCAATATTAAAATCCTTAACTTTGACGAAAAGGCAATTTTTGTATATTGAGTTTCCTTACTTTTTTGAACAGAACGTACTTTTAGACACTTTGCAAAGGCCTTCAGCAAATTTTTTT	1	chrII_609798_G_T	141	2	0	firstTileUTR	TRUE
firstTileUTR_00620	YBR197C_5UTR_0	YBR197C_5UTR	chrII	615867	-	GGCGCGCCGTTCGTGCCAGCAACATACATTTCATCTTATTTCTCTGGAAGGTTTTTACAACAACCAGTTACATTTTTCATTTTTCTGTTCTTCGCCTTTCTTGTTTTGGCCCCGATGACTGAGCGAAAAAAAAAAGGCTAAAGAAGACGCTA	3	chrII_615887_A_G;chrII_615970_C_G;chrII_615984_GA_G	125;42;28	111	0	firstTileUTR	TRUE
firstTileUTR_00621	YBR197C_5UTR_0	YBR197C_5UTR	chrII	615867	-	GGCGCGCCGTTCGTGCCAGCAACATACGTTTCATCTTATTTCTCTGGAAGGTTTTTACAACAACCAGTTACATTTTTCATTTTTCTGTTCTTCGCCTTTCTTGTTTTGGCCCCGATGACTGAGCGAAAAAAAAAAGGCTAAAGAAGACGCTA	3	chrII_615887_A_G;chrII_615970_C_G;chrII_615984_GA_G	125;42;28	211	0	firstTileUTR	TRUE
firstTileUTR_00622	YBR197C_5UTR_0	YBR197C_5UTR	chrII	615867	-	GGCGCGCCGTTCGTGCCAGCAACATACATTTCATCTTATTTCTCTGGAAGGTTTTTACAACAACCAGTTACATTTTTCATTTTTCTGTTCTTCGCCTTTCTTGTTTTGGCGCCGATGACTGAGCGAAAAAAAAAAGGCTAAAGAAGACGCTA	3	chrII_615887_A_G;chrII_615970_C_G;chrII_615984_GA_G	125;42;28	121	0	firstTileUTR	TRUE
firstTileUTR_00623	YBR197C_5UTR_0	YBR197C_5UTR	chrII	615867	-	GGCGCGCCGTTCGTGCCAGCAACATACATTTCATCTTATTTCTCTGGAAGGTTTTTACAACAACCAGTTACATTTTTCATTTTTCTGTTCTTCGCCTTTCTTGTTTTGGCCCCGATGACTGAGCGAAAAAAAAAGGCTAAAGAAGACGCTA	3	chrII_615887_A_G;chrII_615970_C_G;chrII_615984_GA_G	125;42;28	112	0	firstTileUTR	TRUE
firstTileUTR_00624	YBR197C_5UTR_0	YBR197C_5UTR	chrII	615867	-	GGCGCGCCGTTCGTGCCAGCAACATACGTTTCATCTTATTTCTCTGGAAGGTTTTTACAACAACCAGTTACATTTTTCATTTTTCTGTTCTTCGCCTTTCTTGTTTTGGCGCCGATGACTGAGCGAAAAAAAAAGGCTAAAGAAGACGCTA	3	chrII_615887_A_G;chrII_615970_C_G;chrII_615984_GA_G	125;42;28	222	0	firstTileUTR	TRUE
firstTileUTR_00625	YBR198C_5UTR_0	YBR198C_5UTR	chrII	618601	-	GGCGCGCCGCTTTATTGCTCTTTCTGCCACTTTGTAGACTTCATTTGAAATCTTGAAACTTTTTTGCTTTTGAACAATTCATCTGAACCCGTAAAAGATGATATTTACAGCTACTTTTACCCGGCTAAGGGGAGAATTCCATTCAACGGAAC	2	chrII_618646_T_C;chrII_618736_T_G	100;10	11	0	firstTileUTR	TRUE
firstTileUTR_00626	YBR198C_5UTR_0	YBR198C_5UTR	chrII	618601	-	GGCGCGCCGCTTTATTGCTCTTTCTGCCACTTTGTAGACTTCATTTGAAATCCTGAAACTTTTTTGCTTTTGAACAATTCATCTGAACCCGTAAAAGATGATATTTACAGCTACTTTTACCCGGCTAAGGGGAGAATTCCATTCAACGGAAC	2	chrII_618646_T_C;chrII_618736_T_G	100;10	21	0	firstTileUTR	TRUE
firstTileUTR_00627	YBR198C_5UTR_0	YBR198C_5UTR	chrII	618601	-	GGCGCGCCGCTTTATTGCTCTTTCTGCCACTTTGTAGACTTCATTTGAAATCTTGAAACTTTTTTGCTTTTGAACAATTCATCTGAACCCGTAAAAGATGATATTTACAGCTACTTTTACCCGGCTAAGGGGAGAATTCCATGCAACGGAAC	2	chrII_618646_T_C;chrII_618736_T_G	100;10	12	0	firstTileUTR	TRUE
firstTileUTR_00628	YBR198C_5UTR_0	YBR198C_5UTR	chrII	618601	-	GGCGCGCCGCTTTATTGCTCTTTCTGCCACTTTGTAGACTTCATTTGAAATCCTGAAACTTTTTTGCTTTTGAACAATTCATCTGAACCCGTAAAAGATGATATTTACAGCTACTTTTACCCGGCTAAGGGGAGAATTCCATGCAACGGAAC	2	chrII_618646_T_C;chrII_618736_T_G	100;10	22	0	firstTileUTR	TRUE
firstTileUTR_00629	YBR199W_5UTR_0	YBR199W_5UTR	chrII	618810	+	GGCGCGCCATCTGCATATCAAATGGTTCAAAATATTTCACTACATGCAGTTAGAGAACGTCTTATAGAGCTCGTTCCGTTGAATGGAATTCTCCCCTTAGCCGGGTAAAAGTAGCTGTAAATATCATCTTTTACGGGTTCAGATGAATTGTT	1	chrII_618736_T_G	71	1	0	firstTileUTR	TRUE
firstTileUTR_00630	YBR199W_5UTR_0	YBR199W_5UTR	chrII	618810	+	GGCGCGCCATCTGCATATCAAATGGTTCAAAATATTTCACTACATGCAGTTAGAGAACGTCTTATAGAGCTCGTTCCGTTGCATGGAATTCTCCCCTTAGCCGGGTAAAAGTAGCTGTAAATATCATCTTTTACGGGTTCAGATGAATTGTT	1	chrII_618736_T_G	71	2	0	firstTileUTR	TRUE
firstTileUTR_00631	YBR200W_5UTR_0	YBR200W_5UTR	chrII	620817	+	GGCGCGCCATGGGTTTAGTATATTAGTGAAAACATATGCTGATTAAGATGGTACATCAAATTATGGCTGTATTGTCACTTTCTTTTTTTCCTGTTCGTAAATGAATGGGGCCCTTCGCCATTTGTCCGTTTAGGGTAATATTAGTTAAGAAG	1	chrII_620680_A_G	8	1	0	firstTileUTR	TRUE
firstTileUTR_00632	YBR200W_5UTR_0	YBR200W_5UTR	chrII	620817	+	GGCGCGCCATGGGTTTAGTATATTAGTGAAAACATATGCTGATTAAGATGGTACATCAAATTATGGCTGTATTGTCACTTTCTTTTTTTCCTGTTCGTAAATGAATGGGGCCCTTCGCCATTTGTCCGTTTAGGGTAATATTAGCTAAGAAG	1	chrII_620680_A_G	8	2	0	firstTileUTR	TRUE
firstTileUTR_00633	YBR201W_5UTR_0	YBR201W_5UTR	chrII	623440	+	GGCGCGCCACCTTCTGTTTTTCAACTGATTTCAATTTAGGGACTCACATCTATCTTGGGCCATTTATGGTTTATATGGATGGTTGAAAAAGGACAGCGCGCGTATTCGTGCGTCGGTAAATTACAAAGAAAAAAGGAAATCAAGAGGATTCC	3	chrII_623413_A_T;chrII_623418_A_T;chrII_623427_A_G	118;123;132	111	0	firstTileUTR	FALSE
firstTileUTR_00634	YBR201W_5UTR_0	YBR201W_5UTR	chrII	623440	+	GGCGCGCCACCTTCTGTTTTTCAACTGATTTCAAATTAGGGACTCACATCTATCTTGGGCCATTTATGGTTTATATGGATGGTTGAAAAAGGACAGCGCGCGTATTCGTGCGTCGGTAAATTACAAAGAAAAAAGGAAATCAAGAGGATTCC	3	chrII_623413_A_T;chrII_623418_A_T;chrII_623427_A_G	118;123;132	211	0	firstTileUTR	FALSE
firstTileUTR_00635	YBR201W_5UTR_0	YBR201W_5UTR	chrII	623440	+	GGCGCGCCACCTTCTGTTTTTCAACTGATATCAATTTAGGGACTCACATCTATCTTGGGCCATTTATGGTTTATATGGATGGTTGAAAAAGGACAGCGCGCGTATTCGTGCGTCGGTAAATTACAAAGAAAAAAGGAAATCAAGAGGATTCC	3	chrII_623413_A_T;chrII_623418_A_T;chrII_623427_A_G	118;123;132	121	0	firstTileUTR	FALSE
firstTileUTR_00636	YBR201W_5UTR_0	YBR201W_5UTR	chrII	623440	+	GGCGCGCCACCTTCTGTTTTCCAACTGATTTCAATTTAGGGACTCACATCTATCTTGGGCCATTTATGGTTTATATGGATGGTTGAAAAAGGACAGCGCGCGTATTCGTGCGTCGGTAAATTACAAAGAAAAAAGGAAATCAAGAGGATTCC	3	chrII_623413_A_T;chrII_623418_A_T;chrII_623427_A_G	118;123;132	112	0	firstTileUTR	FALSE
firstTileUTR_00637	YBR201W_5UTR_0	YBR201W_5UTR	chrII	623440	+	GGCGCGCCACCTTCTGTTTTCCAACTGATATCAAATTAGGGACTCACATCTATCTTGGGCCATTTATGGTTTATATGGATGGTTGAAAAAGGACAGCGCGCGTATTCGTGCGTCGGTAAATTACAAAGAAAAAAGGAAATCAAGAGGATTCC	3	chrII_623413_A_T;chrII_623418_A_T;chrII_623427_A_G	118;123;132	222	0	firstTileUTR	FALSE
firstTileUTR_00638	YBR201C-A_5UTR_0	YBR201C-A_5UTR	chrII	624760	-	GGCGCGCCGTCACAGGGAATAAATGTGGAATATAAAAGAGAGGAGAGGAGAGGAAAGAAGAAAAAAAACTTGGTGTCCGTTTGCAGATGGCCTATTATATACCCTGCTTATATAACTCTGAGAATTAGGAATATTTTGCTGTTGCTATGGTA	4	chrII_624762_T_C;chrII_624798_A_G;chrII_624805_G_A;chrII_624836_C_A	143;107;100;69	1111	0	firstTileUTR	FALSE
firstTileUTR_00639	YBR201C-A_5UTR_0	YBR201C-A_5UTR	chrII	624760	-	GGCGCGCCGCCACAGGGAATAAATGTGGAATATAAAAGAGAGGAGAGGAGAGGAAAGAAGAAAAAAAACTTGGTGTCCGTTTGCAGATGGCCTATTATATACCCTGCTTATATAACTCTGAGAATTAGGAATATTTTGCTGTTGCTATGGTA	4	chrII_624762_T_C;chrII_624798_A_G;chrII_624805_G_A;chrII_624836_C_A	143;107;100;69	2111	0	firstTileUTR	FALSE
firstTileUTR_00640	YBR201C-A_5UTR_0	YBR201C-A_5UTR	chrII	624760	-	GGCGCGCCGTCACAGGGAATAAATGTGGAATATAAAAGAGAGGAGGGGAGAGGAAAGAAGAAAAAAAACTTGGTGTCCGTTTGCAGATGGCCTATTATATACCCTGCTTATATAACTCTGAGAATTAGGAATATTTTGCTGTTGCTATGGTA	4	chrII_624762_T_C;chrII_624798_A_G;chrII_624805_G_A;chrII_624836_C_A	143;107;100;69	1211	0	firstTileUTR	FALSE
firstTileUTR_00641	YBR201C-A_5UTR_0	YBR201C-A_5UTR	chrII	624760	-	GGCGCGCCGTCACAGGGAATAAATGTGGAATATAAAAGAGAGGAGAGGAGAGAAAAGAAGAAAAAAAACTTGGTGTCCGTTTGCAGATGGCCTATTATATACCCTGCTTATATAACTCTGAGAATTAGGAATATTTTGCTGTTGCTATGGTA	4	chrII_624762_T_C;chrII_624798_A_G;chrII_624805_G_A;chrII_624836_C_A	143;107;100;69	1121	0	firstTileUTR	FALSE
firstTileUTR_00642	YBR201C-A_5UTR_0	YBR201C-A_5UTR	chrII	624760	-	GGCGCGCCGTCACAGGGAATAAATGTGGAATATAAAAGAGAGGAGAGGAGAGGAAAGAAGAAAAAAAACTTGGTGTCCGTTTGAAGATGGCCTATTATATACCCTGCTTATATAACTCTGAGAATTAGGAATATTTTGCTGTTGCTATGGTA	4	chrII_624762_T_C;chrII_624798_A_G;chrII_624805_G_A;chrII_624836_C_A	143;107;100;69	1112	0	firstTileUTR	FALSE
firstTileUTR_00643	YBR201C-A_5UTR_0	YBR201C-A_5UTR	chrII	624760	-	GGCGCGCCGCCACAGGGAATAAATGTGGAATATAAAAGAGAGGAGGGGAGAGAAAAGAAGAAAAAAAACTTGGTGTCCGTTTGAAGATGGCCTATTATATACCCTGCTTATATAACTCTGAGAATTAGGAATATTTTGCTGTTGCTATGGTA	4	chrII_624762_T_C;chrII_624798_A_G;chrII_624805_G_A;chrII_624836_C_A	143;107;100;69	2222	0	firstTileUTR	FALSE
firstTileUTR_00644	YBR202W_5UTR_0	YBR202W_5UTR	chrII	625707	+	GGCGCGCCGCCTTTCTAAATGTAAGTTATTGGTAAAGACGTGTATGTAGCCTGCTACTGTAGTACATCTCGCTCTGGTCCTTTGCTTGTATCTCACTTTCGTGAAAAAAGAAGCAAACCGACTTAATGAATTGCATTTATTTTCCTTATAAG	2	chrII_625628_A_C;chrII_625690_C_A	66;128	11	0	firstTileUTR	TRUE
firstTileUTR_00645	YBR202W_5UTR_0	YBR202W_5UTR	chrII	625707	+	GGCGCGCCGCCTTTCTAAATGTAAGTTATTGGTAAAGACGTGTATGTAGCCTGCTACTGTAGTACATCTCGCTCTGGTCCTTTGCTGGTATCTCACTTTCGTGAAAAAAGAAGCAAACCGACTTAATGAATTGCATTTATTTTCCTTATAAG	2	chrII_625628_A_C;chrII_625690_C_A	66;128	21	0	firstTileUTR	TRUE
firstTileUTR_00646	YBR202W_5UTR_0	YBR202W_5UTR	chrII	625707	+	GGCGCGCCGCCTTTCTAAATGTAATTTATTGGTAAAGACGTGTATGTAGCCTGCTACTGTAGTACATCTCGCTCTGGTCCTTTGCTTGTATCTCACTTTCGTGAAAAAAGAAGCAAACCGACTTAATGAATTGCATTTATTTTCCTTATAAG	2	chrII_625628_A_C;chrII_625690_C_A	66;128	12	0	firstTileUTR	TRUE
firstTileUTR_00647	YBR202W_5UTR_0	YBR202W_5UTR	chrII	625707	+	GGCGCGCCGCCTTTCTAAATGTAATTTATTGGTAAAGACGTGTATGTAGCCTGCTACTGTAGTACATCTCGCTCTGGTCCTTTGCTGGTATCTCACTTTCGTGAAAAAAGAAGCAAACCGACTTAATGAATTGCATTTATTTTCCTTATAAG	2	chrII_625628_A_C;chrII_625690_C_A	66;128	22	0	firstTileUTR	TRUE
firstTileUTR_00648	YBR203W_5UTR_0	YBR203W_5UTR	chrII	628956	+	GGCGCGCCATTAGTTTGAGAGTGGGACTATATATATATAGACTATATAAATATATATATATATATACTTATATTTTTGACAGTAGGGATGGAGATCGATGAATGTTGCCTTCACATGTTAATGAATGAAAAAAATTTTACTGTCTGCG	3	chrII_628886_C_CA;chrII_628897_GTA_GCATATATATA;chrII_628943_C_G	71;82;128	111	0	firstTileUTR	TRUE
firstTileUTR_00649	YBR203W_5UTR_0	YBR203W_5UTR	chrII	628956	+	GGCGCGCCATTAGTTTGAGAGTGGGACTATATATATATAGACTATATAAATATATATATATATATACTTATATTTTTTGACAGTAGGGATGGAGATCGATGAATGTTGCCTTCACATGTTAATGAATGAAAAAAATTTTACTGTCTGCG	3	chrII_628886_C_CA;chrII_628897_GTA_GCATATATATA;chrII_628943_C_G	71;82;128	211	0	firstTileUTR	TRUE
firstTileUTR_00650	YBR203W_5UTR_0	YBR203W_5UTR	chrII	628956	+	GGCGCGCCATTAGTTTGAGAGTGGGACTATATATATATAGACTATATAAATATATATATATATATATATATATGCTTATATTTTTGACAGTAGGGATGGAGATCGATGAATGTTGCCTTCACATGTTAATGAATGAAAAAAATTTTACTGTCTGCG	3	chrII_628886_C_CA;chrII_628897_GTA_GCATATATATA;chrII_628943_C_G	71;82;128	121	0	firstTileUTR	TRUE
firstTileUTR_00651	YBR203W_5UTR_0	YBR203W_5UTR	chrII	628956	+	GGCGCGCCATTAGTTTGAGACTGGGACTATATATATATAGACTATATAAATATATATATATATATACTTATATTTTTGACAGTAGGGATGGAGATCGATGAATGTTGCCTTCACATGTTAATGAATGAAAAAAATTTTACTGTCTGCG	3	chrII_628886_C_CA;chrII_628897_GTA_GCATATATATA;chrII_628943_C_G	71;82;128	112	0	firstTileUTR	TRUE
firstTileUTR_00652	YBR203W_5UTR_0	YBR203W_5UTR	chrII	628956	+	GGCGCGCCATTAGTTTGAGACTGGGACTATATATATATAGACTATATAAATATATATATATATATATATATATGCTTATATTTTTTGACAGTAGGGATGGAGATCGATGAATGTTGCCTTCACATGTTAATGAATGAAAAAAATTTTACTGTCTGCG	3	chrII_628886_C_CA;chrII_628897_GTA_GCATATATATA;chrII_628943_C_G	71;82;128	222	0	firstTileUTR	TRUE
firstTileUTR_00653	YBR204C_5UTR_0	YBR204C_5UTR	chrII	633425	-	GGCGCGCCGAGTTACGATCCAAATGCGACTGTACCATCTTGGTAGTTCTTTATTAATGAACCCTTTAAAATTGCCGGGTTAAAAGAATGGCGCGTCCTCTTGAAACTTTTCGAAGAAAACAACGTAACTGATGGTTAAAATTTGCATAAAGA	1	chrII_633468_T_G	102	1	0	firstTileUTR	FALSE
firstTileUTR_00654	YBR204C_5UTR_0	YBR204C_5UTR	chrII	633425	-	GGCGCGCCGAGTTACGATCCAAATGCGACTGTACCATCTTGGTAGTTCTTGATTAATGAACCCTTTAAAATTGCCGGGTTAAAAGAATGGCGCGTCCTCTTGAAACTTTTCGAAGAAAACAACGTAACTGATGGTTAAAATTTGCATAAAGA	1	chrII_633468_T_G	102	2	0	firstTileUTR	FALSE
firstTileUTR_00655	YBR210W_5UTR_0	YBR210W_5UTR	chrII	645512	+	GGCGCGCCAGTTTTATCTTTAGTAAAAAATGATAATGAAAGTGCTTATATGAATAAAGGTATTAATGTCTTCGTATTTAGCAATGTAATTGAAAAATCATTCGTGGCCCACGACAATATTTCCAAATTATCACAGCTTTCGATAGAAGTGAA	1	chrII_645476_G_A	109	1	0	firstTileUTR	FALSE
firstTileUTR_00656	YBR210W_5UTR_0	YBR210W_5UTR	chrII	645512	+	GGCGCGCCAGTTTTATCTTTAGTAAAAAATGATAATGAAAGTGTTTATATGAATAAAGGTATTAATGTCTTCGTATTTAGCAATGTAATTGAAAAATCATTCGTGGCCCACGACAATATTTCCAAATTATCACAGCTTTCGATAGAAGTGAA	1	chrII_645476_G_A	109	2	0	firstTileUTR	FALSE
firstTileUTR_00657	YBR212W_5UTR_0	YBR212W_5UTR	chrII	647480	+	GGCGCGCCATTTTCACTTTTAATGGAGTGTATGAAGGTGCGAAACTGCTTGCTTGACTAAGATTTGGTCTTGAATACAAGTTTGGGGAACGCTTTTTGGAACGGCACTATCGCCCCTTCACAGCCGTTTGAAGCTGGTAGAAAATATTTTAT	1	chrII_647422_C_G	87	1	0	firstTileUTR	TRUE
firstTileUTR_00658	YBR212W_5UTR_0	YBR212W_5UTR	chrII	647480	+	GGCGCGCCATTTTCACTTTTAATGGAGTGTATGAAGGTGCGAAACTGCTTGCTTGACTAAGATTTCGTCTTGAATACAAGTTTGGGGAACGCTTTTTGGAACGGCACTATCGCCCCTTCACAGCCGTTTGAAGCTGGTAGAAAATATTTTAT	1	chrII_647422_C_G	87	2	0	firstTileUTR	TRUE
firstTileUTR_00659	YBR213W_5UTR_0	YBR213W_5UTR	chrII	650298	+	GGCGCGCCAGCCTTTTATTGAAGTAAATGTATATATATATATATGTGTGTGTGTGTGTCCATCATTTACATGCTACTGCCCGTAGTCATCGGACTTTGTAGCGATTTTCACATTTTTTTTCCGTCAGCATGGCTATTATAACACGTGAAATT	1	chrII_650257_CACACAT_C	104	1	0	firstTileUTR	TRUE
firstTileUTR_00660	YBR213W_5UTR_0	YBR213W_5UTR	chrII	650298	+	GGCGCGCCAGCCTTTTATTGAAGTAAATGTATATATATATATGTGTGTGTGTCCATCATTTACATGCTACTGCCCGTAGTCATCGGACTTTGTAGCGATTTTCACATTTTTTTTCCGTCAGCATGGCTATTATAACACGTGAAATT	1	chrII_650257_CACACAT_C	104	2	0	firstTileUTR	TRUE
firstTileUTR_00661	YBR214W_5UTR_0	YBR214W_5UTR	chrII	651336	+	GGCGCGCCGATAAGATAGAAGAAAAGTTGATCTGAACAGGCATTGTTGTTCGTTCTCCAACCCCTATATATGCGAAATATATACAAAATCCCAGTAGATTTTCTCTACACAATAGAAAGGACGCGCCCCTTAAAAGAGGAGGCCCTGTCGCT	1	chrII_651310_C_A	119	1	0	firstTileUTR	FALSE
firstTileUTR_00662	YBR214W_5UTR_0	YBR214W_5UTR	chrII	651336	+	GGCGCGCCGATAAGATAGAAGAAAAGTTGATCTTAACAGGCATTGTTGTTCGTTCTCCAACCCCTATATATGCGAAATATATACAAAATCCCAGTAGATTTTCTCTACACAATAGAAAGGACGCGCCCCTTAAAAGAGGAGGCCCTGTCGCT	1	chrII_651310_C_A	119	2	0	firstTileUTR	FALSE
firstTileUTR_00663	YBR215W_5UTR_0	YBR215W_5UTR	chrII	653319	+	GGCGCGCCGTTCGTTTAAATCGTTTCAGAATGCAAAATTAACCGCATCAGTTTCTGCATTGTGTGTACATTCGCCTGACATATTTTGCTTTAATTTTCCACGACAAGAAAAAAAGATATACATATACGCGACAATAGCAAAAGTCAGAGTTT	3	chrII_653233_AT_A;chrII_653239_G_A;chrII_653275_A_G	59;65;101	111	0	firstTileUTR	FALSE
firstTileUTR_00664	YBR215W_5UTR_0	YBR215W_5UTR	chrII	653319	+	GGCGCGCCGTTCGTTTAAATCGTTTCAGAATGCAAAATTAACCGCATCAGTTTCTGCATTGTGTGTACATTCGCCTGACATATTTTGCTTTATTTTCCACGACAAGAAAAAAAGATATACATATACGCGACAATAGCAAAAGTCAGAGTTT	3	chrII_653233_AT_A;chrII_653239_G_A;chrII_653275_A_G	59;65;101	211	0	firstTileUTR	FALSE
firstTileUTR_00665	YBR215W_5UTR_0	YBR215W_5UTR	chrII	653319	+	GGCGCGCCGTTCGTTTAAATCGTTTCAGAATGCAAAATTAACCGCATCAGTTTCTGCATTGTGTGTACATTCGCCTGACATATTTTGTTTTAATTTTCCACGACAAGAAAAAAAGATATACATATACGCGACAATAGCAAAAGTCAGAGTTT	3	chrII_653233_AT_A;chrII_653239_G_A;chrII_653275_A_G	59;65;101	121	0	firstTileUTR	FALSE
firstTileUTR_00666	YBR215W_5UTR_0	YBR215W_5UTR	chrII	653319	+	GGCGCGCCGTTCGTTTAAATCGTTTCAGAATGCAAAATTAACCGCATCAGTCTCTGCATTGTGTGTACATTCGCCTGACATATTTTGCTTTAATTTTCCACGACAAGAAAAAAAGATATACATATACGCGACAATAGCAAAAGTCAGAGTTT	3	chrII_653233_AT_A;chrII_653239_G_A;chrII_653275_A_G	59;65;101	112	0	firstTileUTR	FALSE
firstTileUTR_00667	YBR215W_5UTR_0	YBR215W_5UTR	chrII	653319	+	GGCGCGCCGTTCGTTTAAATCGTTTCAGAATGCAAAATTAACCGCATCAGTCTCTGCATTGTGTGTACATTCGCCTGACATATTTTGTTTTATTTTCCACGACAAGAAAAAAAGATATACATATACGCGACAATAGCAAAAGTCAGAGTTT	3	chrII_653233_AT_A;chrII_653239_G_A;chrII_653275_A_G	59;65;101	222	0	firstTileUTR	FALSE
firstTileUTR_00668	YBR216C_5UTR_0	YBR216C_5UTR	chrII	657630	-	GGCGCGCCGGTGATTTTCTTTTTCAGTGTTTATTTGTTAATAATGTTCACCGGCAATTAGTCTTTATTTTTTTCCTTTACATTGTCAAATTTAAAGAATCGTACTTATGAAGGATGCCCGCTTAGTGTTTGACAGAAAGCTACTTGAGCTGA	1	chrII_657722_C_T	53	1	0	firstTileUTR	TRUE
firstTileUTR_00669	YBR216C_5UTR_0	YBR216C_5UTR	chrII	657630	-	GGCGCGCCGGTGATTTTCTTTTTCAGTGTTTATTTGTTAATAATGTTCACCGGCAATTAGTCTTTATTTTTTTCCTTTACATTGTCAAATTTAAAGAATTGTACTTATGAAGGATGCCCGCTTAGTGTTTGACAGAAAGCTACTTGAGCTGA	1	chrII_657722_C_T	53	2	0	firstTileUTR	TRUE
firstTileUTR_00670	YBR217W_5UTR_0	YBR217W_5UTR	chrII	657768	+	GGCGCGCCAAGTAGCTTTCTGTCAAACACTAAGCGGGCATCCTTCATAAGTACGATTCTTTAAATTTGACAATGTAAAGGAAAAAAATAAAGACTAATTGCCGGTGAACATTATTAACAAATAAACACTGAAAAAGAAAATCACCCTAGACA	1	chrII_657722_C_T	99	1	0	firstTileUTR	FALSE
firstTileUTR_00671	YBR217W_5UTR_0	YBR217W_5UTR	chrII	657768	+	GGCGCGCCAAGTAGCTTTCTGTCAAACACTAAGCGGGCATCCTTCATAAGTACAATTCTTTAAATTTGACAATGTAAAGGAAAAAAATAAAGACTAATTGCCGGTGAACATTATTAACAAATAAACACTGAAAAAGAAAATCACCCTAGACA	1	chrII_657722_C_T	99	2	0	firstTileUTR	FALSE
firstTileUTR_00672	YBR218C_5UTR_0	YBR218C_5UTR	chrII	662311	-	GGCGCGCCATAGTAATTGGCAAAAAAATCAAACTCAAATGACGGGCCACAGATAGTAAGCTACAAGAGTTTGGAAGAAAAGAGGGGCTTGTTTATGTATGTAATCAAGTAAGGATACCGAAAGTAAGAGAAAAGAAAAAAGGACTAAAAATC	2	chrII_662354_G_A;chrII_662444_G_A	102;12	11	0	firstTileUTR	FALSE
firstTileUTR_00673	YBR218C_5UTR_0	YBR218C_5UTR	chrII	662311	-	GGCGCGCCATAGTAATTGGCAAAAAAATCAAACTCAAATGACGGGCCACAAATAGTAAGCTACAAGAGTTTGGAAGAAAAGAGGGGCTTGTTTATGTATGTAATCAAGTAAGGATACCGAAAGTAAGAGAAAAGAAAAAAGGACTAAAAATC	2	chrII_662354_G_A;chrII_662444_G_A	102;12	21	0	firstTileUTR	FALSE
firstTileUTR_00674	YBR218C_5UTR_0	YBR218C_5UTR	chrII	662311	-	GGCGCGCCATAGTAATTGGCAAAAAAATCAAACTCAAATGACGGGCCACAGATAGTAAGCTACAAGAGTTTGGAAGAAAAGAGGGGCTTGTTTATGTATGTAATCAAGTAAGGATACCGAAAGTAAGAGAAAAGAAAAAAAGACTAAAAATC	2	chrII_662354_G_A;chrII_662444_G_A	102;12	12	0	firstTileUTR	FALSE
firstTileUTR_00675	YBR218C_5UTR_0	YBR218C_5UTR	chrII	662311	-	GGCGCGCCATAGTAATTGGCAAAAAAATCAAACTCAAATGACGGGCCACAAATAGTAAGCTACAAGAGTTTGGAAGAAAAGAGGGGCTTGTTTATGTATGTAATCAAGTAAGGATACCGAAAGTAAGAGAAAAGAAAAAAAGACTAAAAATC	2	chrII_662354_G_A;chrII_662444_G_A	102;12	22	0	firstTileUTR	FALSE
firstTileUTR_00676	YBR229C_5UTR_0	YBR229C_5UTR	chrII	679230	-	GGCGCGCCGGTTGATTCGAGACCGCTATTTTAAGATACGCAGAGCAATCAAATAACTCCAAGCAACATGTTCATTGAGTTATAGCTCTCAAGTGCCGTAGTGAGAAAATGTCGTGGTCCGGGTAAAACAAATTAAGGGTACTTGAAATGAAA	2	chrII_679276_A_C;chrII_679332_G_T	99;43	11	0	firstTileUTR	FALSE
firstTileUTR_00677	YBR229C_5UTR_0	YBR229C_5UTR	chrII	679230	-	GGCGCGCCGGTTGATTCGAGACCGCTATTTTAAGATACGCAGAGCAATCAAATCACTCCAAGCAACATGTTCATTGAGTTATAGCTCTCAAGTGCCGTAGTGAGAAAATGTCGTGGTCCGGGTAAAACAAATTAAGGGTACTTGAAATGAAA	2	chrII_679276_A_C;chrII_679332_G_T	99;43	21	0	firstTileUTR	FALSE
firstTileUTR_00678	YBR229C_5UTR_0	YBR229C_5UTR	chrII	679230	-	GGCGCGCCGGTTGATTCGAGACCGCTATTTTAAGATACGCAGAGCAATCAAATAACTCCAAGCAACATGTTCATTGAGTTATAGCTCTCAAGTGCCGTAGTGAGAAAATTTCGTGGTCCGGGTAAAACAAATTAAGGGTACTTGAAATGAAA	2	chrII_679276_A_C;chrII_679332_G_T	99;43	12	0	firstTileUTR	FALSE
firstTileUTR_00679	YBR229C_5UTR_0	YBR229C_5UTR	chrII	679230	-	GGCGCGCCGGTTGATTCGAGACCGCTATTTTAAGATACGCAGAGCAATCAAATCACTCCAAGCAACATGTTCATTGAGTTATAGCTCTCAAGTGCCGTAGTGAGAAAATTTCGTGGTCCGGGTAAAACAAATTAAGGGTACTTGAAATGAAA	2	chrII_679276_A_C;chrII_679332_G_T	99;43	22	0	firstTileUTR	FALSE
firstTileUTR_00680	YBR231C_5UTR_0	YBR231C_5UTR	chrII	683147	-	GGCGCGCCGTCTTTTTTCTTACTTGTCGATTAATCCTATTCATCATCTTTAAACTTCGCTCTTTAATTCACTTTTTTTTGTCTTTCCCCGATATGGTACTTACACGAAATATCATGATACAAAAGAAAACACGTACATACTCGTCAAACGAT	1	chrII_683268_A_G	24	1	0	firstTileUTR	TRUE
firstTileUTR_00681	YBR231C_5UTR_0	YBR231C_5UTR	chrII	683147	-	GGCGCGCCGTCTTTTTTCTTACTTGTCGATTAATCCTATTCATCATCTTTAAACTTCGCTCTTTAATTCACTTTTTTTTGTCTTTCCCCGATATGGTACTTACACGAAATATCATGATACAAAAGAAAGCACGTACATACTCGTCAAACGAT	1	chrII_683268_A_G	24	2	0	firstTileUTR	TRUE
firstTileUTR_00682	YBR233W_5UTR_0	YBR233W_5UTR	chrII	683349	+	GGCGCGCCGGATAAGTTTGAATATGAAAAAGGTTACTTATGCGGCTAACGACTAGGTGCGTATTTATCGTTTGACGAGTATGTACGTGTTTTCTTTTGTATCATGATATTTCGTGTAAGTACCATATCGGGGAAAGACAAAAAAAAGTGAAT	1	chrII_683268_A_G	64	1	0	firstTileUTR	TRUE
firstTileUTR_00683	YBR233W_5UTR_0	YBR233W_5UTR	chrII	683349	+	GGCGCGCCGGATAAGTTTGAATATGAAAAAGGTTACTTATGCGGCTAACGACTAGGTGCGTATTTATCGTTTGACGAGTATGTACGTGCTTTCTTTTGTATCATGATATTTCGTGTAAGTACCATATCGGGGAAAGACAAAAAAAAGTGAAT	1	chrII_683268_A_G	64	2	0	firstTileUTR	TRUE
firstTileUTR_00684	YBR233W-A_5UTR_0	YBR233W-A_5UTR	chrII	684938	+	GGCGCGCCGACTGGCTACTGTAAGCTCTTCTTTTGTATTCTTTGGAATAGTTTATTTACATGTAATTACTGTAATAGCGCGCAGCCGAGCTAAAAAAAAAAAAAATACAAAGCTTTTGATCAATTTGTTACAAAGAGAAATAATTCCGCGTA	3	chrII_684795_A_G;chrII_684797_G_A;chrII_684840_ATT_ATTTT	2;4;47	111	0	firstTileUTR	FALSE
firstTileUTR_00685	YBR233W-A_5UTR_0	YBR233W-A_5UTR	chrII	684938	+	GGCGCGCCGACTGGCTACTGTAAGCTCTTCTTTTGTATTCTTTGGAATAGTTTATTTACATGTAATTACTGTAATAGCGCGCAGCCGAGCTAAAAAAAAAAAAAATACAAAGCTTTTGATCAATTTGTTACAAAGAGAAATAATTCCGCGCA	3	chrII_684795_A_G;chrII_684797_G_A;chrII_684840_ATT_ATTTT	2;4;47	211	0	firstTileUTR	FALSE
firstTileUTR_00686	YBR233W-A_5UTR_0	YBR233W-A_5UTR	chrII	684938	+	GGCGCGCCGACTGGCTACTGTAAGCTCTTCTTTTGTATTCTTTGGAATAGTTTATTTACATGTAATTACTGTAATAGCGCGCAGCCGAGCTAAAAAAAAAAAAAATACAAAGCTTTTGATCAATTTGTTACAAAGAGAAATAATTCCGTGTA	3	chrII_684795_A_G;chrII_684797_G_A;chrII_684840_ATT_ATTTT	2;4;47	121	0	firstTileUTR	FALSE
firstTileUTR_00687	YBR233W-A_5UTR_0	YBR233W-A_5UTR	chrII	684938	+	GGCGCGCCGACTGGCTACTGTAAGCTCTTCTTTTGTATTCTTTGGAATAGTTTATTTACATGTAATTACTGTAATAGCGCGCAGCCGAGCTAAAAAAAAAAAAAAAATACAAAGCTTTTGATCAATTTGTTACAAAGAGAAATAATTCCGCGTA	3	chrII_684795_A_G;chrII_684797_G_A;chrII_684840_ATT_ATTTT	2;4;47	112	0	firstTileUTR	FALSE
firstTileUTR_00688	YBR233W-A_5UTR_0	YBR233W-A_5UTR	chrII	684938	+	GGCGCGCCGACTGGCTACTGTAAGCTCTTCTTTTGTATTCTTTGGAATAGTTTATTTACATGTAATTACTGTAATAGCGCGCAGCCGAGCTAAAAAAAAAAAAAAAATACAAAGCTTTTGATCAATTTGTTACAAAGAGAAATAATTCCGTGCA	3	chrII_684795_A_G;chrII_684797_G_A;chrII_684840_ATT_ATTTT	2;4;47	222	0	firstTileUTR	FALSE
firstTileUTR_00689	YBR234C_5UTR_0	YBR234C_5UTR	chrII	686638	-	GGCGCGCCATTTTTCTTTGTTTCTAATCTGGAAGCTTTCTCGATCAAGATTGCTCTTATTTGACCCTTTTTCATTATAGGCAAGGCGCGGGCGGGTGACAAGAAGATTTTGATAATTGTGCAACTGATAACGTAGGATTCATTATCAACATT	1	chrII_686767_A_G	16	1	0	firstTileUTR	TRUE
firstTileUTR_00690	YBR234C_5UTR_0	YBR234C_5UTR	chrII	686638	-	GGCGCGCCATTTTTCTTTGTTTCTAATCTGGAAGCTTTCTCGATCAAGATTGCTCTTATTTGACCCTTTTTCATTATAGGCAAGGCGCGGGCGGGTGACAAGAAGATTTTGATAATTGTGCAACTGATAACGTAGGGTTCATTATCAACATT	1	chrII_686767_A_G	16	2	0	firstTileUTR	TRUE
firstTileUTR_00691	YBR235W_5UTR_0	YBR235W_5UTR	chrII	686820	+	GGCGCGCCAACCATTTCTTAGATTTCCTTGTTACTCTTTAACAACAATGTTGATAATGAATCCTACGTTATCAGTTGCACAATTATCAAAATCTTCTTGTCACCCGCCCGCGCCTTGCCTATAATGAAAAAGGGTCAAATAAGAGCAATCTT	2	chrII_686767_A_G;chrII_686783_G_A	92;108	11	0	firstTileUTR	TRUE
firstTileUTR_00692	YBR235W_5UTR_0	YBR235W_5UTR	chrII	686820	+	GGCGCGCCAACCATTTCTTAGATTTCCTTGTTACTCTTTAACAACAATGTTGATAATGAACCCTACGTTATCAGTTGCACAATTATCAAAATCTTCTTGTCACCCGCCCGCGCCTTGCCTATAATGAAAAAGGGTCAAATAAGAGCAATCTT	2	chrII_686767_A_G;chrII_686783_G_A	92;108	21	0	firstTileUTR	TRUE
firstTileUTR_00693	YBR235W_5UTR_0	YBR235W_5UTR	chrII	686820	+	GGCGCGCCAACCATTTCTTAGATTTCCTTGTTACTCTTTAACAATAATGTTGATAATGAATCCTACGTTATCAGTTGCACAATTATCAAAATCTTCTTGTCACCCGCCCGCGCCTTGCCTATAATGAAAAAGGGTCAAATAAGAGCAATCTT	2	chrII_686767_A_G;chrII_686783_G_A	92;108	12	0	firstTileUTR	TRUE
firstTileUTR_00694	YBR235W_5UTR_0	YBR235W_5UTR	chrII	686820	+	GGCGCGCCAACCATTTCTTAGATTTCCTTGTTACTCTTTAACAATAATGTTGATAATGAACCCTACGTTATCAGTTGCACAATTATCAAAATCTTCTTGTCACCCGCCCGCGCCTTGCCTATAATGAAAAAGGGTCAAATAAGAGCAATCTT	2	chrII_686767_A_G;chrII_686783_G_A	92;108	22	0	firstTileUTR	TRUE
firstTileUTR_00695	YBR236C_5UTR_0	YBR236C_5UTR	chrII	691731	-	GGCGCGCCGTAGTAGTTGTCACATTAATCGGAAAAGTGTCTCACATGTAAAGGATTAAAATAAGAAATCTTCTAATTTATGTTGAAATATCTTGATTTACCATTACCCGGATTAGATGAAACTAATTAAAGTCATTTAGAGCAATGGACCAA	4	chrII_691742_T_C;chrII_691776_G_T;chrII_691838_G_A;chrII_691869_G_A	134;100;38;7	1111	0	firstTileUTR	FALSE
firstTileUTR_00696	YBR236C_5UTR_0	YBR236C_5UTR	chrII	691731	-	GGCGCGCCGTAGTAGTTGCCACATTAATCGGAAAAGTGTCTCACATGTAAAGGATTAAAATAAGAAATCTTCTAATTTATGTTGAAATATCTTGATTTACCATTACCCGGATTAGATGAAACTAATTAAAGTCATTTAGAGCAATGGACCAA	4	chrII_691742_T_C;chrII_691776_G_T;chrII_691838_G_A;chrII_691869_G_A	134;100;38;7	2111	0	firstTileUTR	FALSE
firstTileUTR_00697	YBR236C_5UTR_0	YBR236C_5UTR	chrII	691731	-	GGCGCGCCGTAGTAGTTGTCACATTAATCGGAAAAGTGTCTCACATGTAAAGTATTAAAATAAGAAATCTTCTAATTTATGTTGAAATATCTTGATTTACCATTACCCGGATTAGATGAAACTAATTAAAGTCATTTAGAGCAATGGACCAA	4	chrII_691742_T_C;chrII_691776_G_T;chrII_691838_G_A;chrII_691869_G_A	134;100;38;7	1211	0	firstTileUTR	FALSE
firstTileUTR_00698	YBR236C_5UTR_0	YBR236C_5UTR	chrII	691731	-	GGCGCGCCGTAGTAGTTGTCACATTAATCGGAAAAGTGTCTCACATGTAAAGGATTAAAATAAGAAATCTTCTAATTTATGTTGAAATATCTTGATTTACCATTACCCGGATTAAATGAAACTAATTAAAGTCATTTAGAGCAATGGACCAA	4	chrII_691742_T_C;chrII_691776_G_T;chrII_691838_G_A;chrII_691869_G_A	134;100;38;7	1121	0	firstTileUTR	FALSE
firstTileUTR_00699	YBR236C_5UTR_0	YBR236C_5UTR	chrII	691731	-	GGCGCGCCGTAGTAGTTGTCACATTAATCGGAAAAGTGTCTCACATGTAAAGGATTAAAATAAGAAATCTTCTAATTTATGTTGAAATATCTTGATTTACCATTACCCGGATTAGATGAAACTAATTAAAGTCATTTAGAGCAATAGACCAA	4	chrII_691742_T_C;chrII_691776_G_T;chrII_691838_G_A;chrII_691869_G_A	134;100;38;7	1112	0	firstTileUTR	FALSE
firstTileUTR_00700	YBR236C_5UTR_0	YBR236C_5UTR	chrII	691731	-	GGCGCGCCGTAGTAGTTGCCACATTAATCGGAAAAGTGTCTCACATGTAAAGTATTAAAATAAGAAATCTTCTAATTTATGTTGAAATATCTTGATTTACCATTACCCGGATTAAATGAAACTAATTAAAGTCATTTAGAGCAATAGACCAA	4	chrII_691742_T_C;chrII_691776_G_T;chrII_691838_G_A;chrII_691869_G_A	134;100;38;7	2222	0	firstTileUTR	FALSE
firstTileUTR_00701	YBR237W_5UTR_0	YBR237W_5UTR	chrII	691913	+	GGCGCGCCGCTGTATTATATTAGAAAGAACTCTAATACCTTTAGTTTGGTCCATTGCTCTAAATGACTTTAATTAGTTTCATCTAATCCGGGTAATGGTAAATCAAGATATTTCAACATAAATTAGAAGATTTCTTATTTTAATCCTTTACA	5	chrII_691776_G_T;chrII_691838_G_A;chrII_691869_G_A;chrII_691880_A_G;chrII_691893_T_C	8;70;101;112;125	11111	0	firstTileUTR	TRUE
firstTileUTR_00702	YBR237W_5UTR_0	YBR237W_5UTR	chrII	691913	+	GGCGCGCCGCTGTATTATATTAGAAAGAACTCTAATACCTTTAGTTTGGTCCATTGCTCTAAATGACTTTAATTAGTTTCATCTAATCCGGGTAATGGTAAATCAAGATATTTCAACATAAATTAGAAGATTTCTTATTTTAATACTTTACA	5	chrII_691776_G_T;chrII_691838_G_A;chrII_691869_G_A;chrII_691880_A_G;chrII_691893_T_C	8;70;101;112;125	21111	0	firstTileUTR	TRUE
firstTileUTR_00703	YBR237W_5UTR_0	YBR237W_5UTR	chrII	691913	+	GGCGCGCCGCTGTATTATATTAGAAAGAACTCTAATACCTTTAGTTTGGTCCATTGCTCTAAATGACTTTAATTAGTTTCATTTAATCCGGGTAATGGTAAATCAAGATATTTCAACATAAATTAGAAGATTTCTTATTTTAATCCTTTACA	5	chrII_691776_G_T;chrII_691838_G_A;chrII_691869_G_A;chrII_691880_A_G;chrII_691893_T_C	8;70;101;112;125	12111	0	firstTileUTR	TRUE
firstTileUTR_00704	YBR237W_5UTR_0	YBR237W_5UTR	chrII	691913	+	GGCGCGCCGCTGTATTATATTAGAAAGAACTCTAATACCTTTAGTTTGGTCTATTGCTCTAAATGACTTTAATTAGTTTCATCTAATCCGGGTAATGGTAAATCAAGATATTTCAACATAAATTAGAAGATTTCTTATTTTAATCCTTTACA	5	chrII_691776_G_T;chrII_691838_G_A;chrII_691869_G_A;chrII_691880_A_G;chrII_691893_T_C	8;70;101;112;125	11211	0	firstTileUTR	TRUE
firstTileUTR_00705	YBR237W_5UTR_0	YBR237W_5UTR	chrII	691913	+	GGCGCGCCGCTGTATTATATTAGAAAGAACTCTAATACCTCTAGTTTGGTCCATTGCTCTAAATGACTTTAATTAGTTTCATCTAATCCGGGTAATGGTAAATCAAGATATTTCAACATAAATTAGAAGATTTCTTATTTTAATCCTTTACA	5	chrII_691776_G_T;chrII_691838_G_A;chrII_691869_G_A;chrII_691880_A_G;chrII_691893_T_C	8;70;101;112;125	11121	0	firstTileUTR	TRUE
firstTileUTR_00706	YBR237W_5UTR_0	YBR237W_5UTR	chrII	691913	+	GGCGCGCCGCTGTATTATATTAGAAAGGACTCTAATACCTTTAGTTTGGTCCATTGCTCTAAATGACTTTAATTAGTTTCATCTAATCCGGGTAATGGTAAATCAAGATATTTCAACATAAATTAGAAGATTTCTTATTTTAATCCTTTACA	5	chrII_691776_G_T;chrII_691838_G_A;chrII_691869_G_A;chrII_691880_A_G;chrII_691893_T_C	8;70;101;112;125	11112	0	firstTileUTR	TRUE
firstTileUTR_00707	YBR237W_5UTR_0	YBR237W_5UTR	chrII	691913	+	GGCGCGCCGCTGTATTATATTAGAAAGGACTCTAATACCTCTAGTTTGGTCTATTGCTCTAAATGACTTTAATTAGTTTCATTTAATCCGGGTAATGGTAAATCAAGATATTTCAACATAAATTAGAAGATTTCTTATTTTAATACTTTACA	5	chrII_691776_G_T;chrII_691838_G_A;chrII_691869_G_A;chrII_691880_A_G;chrII_691893_T_C	8;70;101;112;125	22222	0	firstTileUTR	TRUE
firstTileUTR_00708	YBR238C_5UTR_0	YBR238C_5UTR	chrII	697386	-	GGCGCGCCAGAACGTACTGTATTCAAGAAAAAAAACTGAGAGAAGAATGAAAGGAAAAGGGTTTCTATAGATATAACCAATGCGATATGTAACTTCAGTGCTGAACGACAAAGTTTCTTTATTGCCTTATTTTGACTTTCTTCGAGATGTCC	2	chrII_697455_C_T;chrII_697507_A_C	76;24	11	0	firstTileUTR	FALSE
firstTileUTR_00709	YBR238C_5UTR_0	YBR238C_5UTR	chrII	697386	-	GGCGCGCCAGAACGTACTGTATTCAAGAAAAAAAACTGAGAGAAGAATGAAAGGAAAAGGGTTTCTATAGATATAATCAATGCGATATGTAACTTCAGTGCTGAACGACAAAGTTTCTTTATTGCCTTATTTTGACTTTCTTCGAGATGTCC	2	chrII_697455_C_T;chrII_697507_A_C	76;24	21	0	firstTileUTR	FALSE
firstTileUTR_00710	YBR238C_5UTR_0	YBR238C_5UTR	chrII	697386	-	GGCGCGCCAGAACGTACTGTATTCAAGAAAAAAAACTGAGAGAAGAATGAAAGGAAAAGGGTTTCTATAGATATAACCAATGCGATATGTAACTTCAGTGCTGAACGACAAAGTTTCTTTATTGCCTTCTTTTGACTTTCTTCGAGATGTCC	2	chrII_697455_C_T;chrII_697507_A_C	76;24	12	0	firstTileUTR	FALSE
firstTileUTR_00711	YBR238C_5UTR_0	YBR238C_5UTR	chrII	697386	-	GGCGCGCCAGAACGTACTGTATTCAAGAAAAAAAACTGAGAGAAGAATGAAAGGAAAAGGGTTTCTATAGATATAATCAATGCGATATGTAACTTCAGTGCTGAACGACAAAGTTTCTTTATTGCCTTCTTTTGACTTTCTTCGAGATGTCC	2	chrII_697455_C_T;chrII_697507_A_C	76;24	22	0	firstTileUTR	FALSE
firstTileUTR_00712	YBR239C_5UTR_0	YBR239C_5UTR	chrII	700092	-	GGCGCGCCAGTTTTTTTATGTGGTTACTCTTTTACAATATACTAAAATTGCAACTCATTTGCTTTTTTCATTTCTTTTCCTTCAATTTTTTTTTTTTTTTAGTCTACGGCTAACAAAAAGCATAGGCTCAGAATGATAGATAGATATCCGAT	3	chrII_700097_T_C;chrII_700199_A_T;chrII_700223_G_C	140;38;14	111	0	firstTileUTR	TRUE
firstTileUTR_00713	YBR239C_5UTR_0	YBR239C_5UTR	chrII	700092	-	GGCGCGCCAGTTCTTTTATGTGGTTACTCTTTTACAATATACTAAAATTGCAACTCATTTGCTTTTTTCATTTCTTTTCCTTCAATTTTTTTTTTTTTTTAGTCTACGGCTAACAAAAAGCATAGGCTCAGAATGATAGATAGATATCCGAT	3	chrII_700097_T_C;chrII_700199_A_T;chrII_700223_G_C	140;38;14	211	0	firstTileUTR	TRUE
firstTileUTR_00714	YBR239C_5UTR_0	YBR239C_5UTR	chrII	700092	-	GGCGCGCCAGTTTTTTTATGTGGTTACTCTTTTACAATATACTAAAATTGCAACTCATTTGCTTTTTTCATTTCTTTTCCTTCAATTTTTTTTTTTTTTTAGTCTACGGCTAACTAAAAGCATAGGCTCAGAATGATAGATAGATATCCGAT	3	chrII_700097_T_C;chrII_700199_A_T;chrII_700223_G_C	140;38;14	121	0	firstTileUTR	TRUE
firstTileUTR_00715	YBR239C_5UTR_0	YBR239C_5UTR	chrII	700092	-	GGCGCGCCAGTTTTTTTATGTGGTTACTCTTTTACAATATACTAAAATTGCAACTCATTTGCTTTTTTCATTTCTTTTCCTTCAATTTTTTTTTTTTTTTAGTCTACGGCTAACAAAAAGCATAGGCTCAGAATGATACATAGATATCCGAT	3	chrII_700097_T_C;chrII_700199_A_T;chrII_700223_G_C	140;38;14	112	0	firstTileUTR	TRUE
firstTileUTR_00716	YBR239C_5UTR_0	YBR239C_5UTR	chrII	700092	-	GGCGCGCCAGTTCTTTTATGTGGTTACTCTTTTACAATATACTAAAATTGCAACTCATTTGCTTTTTTCATTTCTTTTCCTTCAATTTTTTTTTTTTTTTAGTCTACGGCTAACTAAAAGCATAGGCTCAGAATGATACATAGATATCCGAT	3	chrII_700097_T_C;chrII_700199_A_T;chrII_700223_G_C	140;38;14	222	0	firstTileUTR	TRUE
firstTileUTR_00717	YBR252W_5UTR_0	YBR252W_5UTR	chrII	722593	+	GGCGCGCCGCTGTATCAGTGCAAACATCTCATTCGAGAACTTAGTTGTTTCTACTTATTAAATGGTAGCGCGTAATATTTTTCCTTTTATAATTTTCAATGGTAGTAAATCAGAAATTATGGAAAAAAAATAAAACTTGGACAGAAAAAAAT	2	chrII_722533_C_T;chrII_722589_C_T	85;141	11	0	firstTileUTR	FALSE
firstTileUTR_00718	YBR252W_5UTR_0	YBR252W_5UTR	chrII	722593	+	GGCGCGCCGCTGTATCAGTGCAAACATCTCATTCGAGAACTTAGTTGTTTCTACTTATTAAATGGTAACGCGTAATATTTTTCCTTTTATAATTTTCAATGGTAGTAAATCAGAAATTATGGAAAAAAAATAAAACTTGGACAGAAAAAAAT	2	chrII_722533_C_T;chrII_722589_C_T	85;141	21	0	firstTileUTR	FALSE
firstTileUTR_00719	YBR252W_5UTR_0	YBR252W_5UTR	chrII	722593	+	GGCGCGCCGCTATATCAGTGCAAACATCTCATTCGAGAACTTAGTTGTTTCTACTTATTAAATGGTAGCGCGTAATATTTTTCCTTTTATAATTTTCAATGGTAGTAAATCAGAAATTATGGAAAAAAAATAAAACTTGGACAGAAAAAAAT	2	chrII_722533_C_T;chrII_722589_C_T	85;141	12	0	firstTileUTR	FALSE
firstTileUTR_00720	YBR252W_5UTR_0	YBR252W_5UTR	chrII	722593	+	GGCGCGCCGCTATATCAGTGCAAACATCTCATTCGAGAACTTAGTTGTTTCTACTTATTAAATGGTAACGCGTAATATTTTTCCTTTTATAATTTTCAATGGTAGTAAATCAGAAATTATGGAAAAAAAATAAAACTTGGACAGAAAAAAAT	2	chrII_722533_C_T;chrII_722589_C_T	85;141	22	0	firstTileUTR	FALSE
firstTileUTR_00721	YBR253W_5UTR_0	YBR253W_5UTR	chrII	723209	+	GGCGCGCCGGCTTATGCATGCTACTAAGTGATAGGTAAATGCGTTAAATGGCAGTACAATTTCCTTAACACTTCAAAGTTTCAGTAATTCAGTCCGGGTCACACTGGATTTATCCTGATTTTATTATACATTATACAAGTGTGCCAAAGTAT	1	chrII_723175_G_C	111	1	0	firstTileUTR	TRUE
firstTileUTR_00722	YBR253W_5UTR_0	YBR253W_5UTR	chrII	723209	+	GGCGCGCCGGCTTATGCATGCTACTAAGTGATAGGTAAATGGGTTAAATGGCAGTACAATTTCCTTAACACTTCAAAGTTTCAGTAATTCAGTCCGGGTCACACTGGATTTATCCTGATTTTATTATACATTATACAAGTGTGCCAAAGTAT	1	chrII_723175_G_C	111	2	0	firstTileUTR	TRUE
firstTileUTR_00723	YBR260C_5UTR_0	YBR260C_5UTR	chrII	734648	-	GGCGCGCCATCACTTCTCTTTTAATCTTCCGAGATTGTATGTTTTTACTTTACATACTATTTTGTTCACATTCTTTATTTTCTGGGTTCTTTTTCCATATATATCGAAAAAAAAGTCTATATAATGGCACAAATGGTGAATGCCAGCACAAG	2	chrII_734729_CT_C;chrII_734775_G_A	64;18	11	0	firstTileUTR	TRUE
firstTileUTR_00724	YBR260C_5UTR_0	YBR260C_5UTR	chrII	734648	-	GGCGCGCCATCACTTCTCTTTTAATCTTCCGAGATTGTATGTTTTTACTTTACATACTATTTTGTTCACATTCTTTATTTTCTGGGTTCTTTTCCATATATATCGAAAAAAAAGTCTATATAATGGCACAAATGGTGAATGCCAGCACAAG	2	chrII_734729_CT_C;chrII_734775_G_A	64;18	21	0	firstTileUTR	TRUE
firstTileUTR_00725	YBR260C_5UTR_0	YBR260C_5UTR	chrII	734648	-	GGCGCGCCATCACTTCTCTTTTAATCTTCCGAGATTGTATGTTTTTACTTTACATACTATTTTGTTCACATTCTTTATTTTCTGGGTTCTTTTTCCATATATATCGAAAAAAAAGTCTATATAATGGCACAAATAGTGAATGCCAGCACAAG	2	chrII_734729_CT_C;chrII_734775_G_A	64;18	12	0	firstTileUTR	TRUE
firstTileUTR_00726	YBR260C_5UTR_0	YBR260C_5UTR	chrII	734648	-	GGCGCGCCATCACTTCTCTTTTAATCTTCCGAGATTGTATGTTTTTACTTTACATACTATTTTGTTCACATTCTTTATTTTCTGGGTTCTTTTCCATATATATCGAAAAAAAAGTCTATATAATGGCACAAATAGTGAATGCCAGCACAAG	2	chrII_734729_CT_C;chrII_734775_G_A	64;18	22	0	firstTileUTR	TRUE
firstTileUTR_00727	YBR269C_5UTR_0	YBR269C_5UTR	chrII	742597	-	GGCGCGCCGGTTCTTTCTGACTCTTTAGCAAGTTAATATGATCTGCACTTTCCCCATTGGCCCCTTTATAGGGCGGAAAAGAGCATCTGTTTTTCCGGATTCTTGGAACAAGAAAAAGGAAATACACCTATCTATATGCCACTATTGTATAT	3	chrII_742620_A_C;chrII_742623_T_C;chrII_742721_C_G	122;119;21	111	0	firstTileUTR	TRUE
firstTileUTR_00728	YBR269C_5UTR_0	YBR269C_5UTR	chrII	742597	-	GGCGCGCCGGTTCTTTCTGACTCTTTAGCACGTTAATATGATCTGCACTTTCCCCATTGGCCCCTTTATAGGGCGGAAAAGAGCATCTGTTTTTCCGGATTCTTGGAACAAGAAAAAGGAAATACACCTATCTATATGCCACTATTGTATAT	3	chrII_742620_A_C;chrII_742623_T_C;chrII_742721_C_G	122;119;21	211	0	firstTileUTR	TRUE
firstTileUTR_00729	YBR269C_5UTR_0	YBR269C_5UTR	chrII	742597	-	GGCGCGCCGGTTCTTTCTGACTCTTTAGCAAGTCAATATGATCTGCACTTTCCCCATTGGCCCCTTTATAGGGCGGAAAAGAGCATCTGTTTTTCCGGATTCTTGGAACAAGAAAAAGGAAATACACCTATCTATATGCCACTATTGTATAT	3	chrII_742620_A_C;chrII_742623_T_C;chrII_742721_C_G	122;119;21	121	0	firstTileUTR	TRUE
firstTileUTR_00730	YBR269C_5UTR_0	YBR269C_5UTR	chrII	742597	-	GGCGCGCCGGTTCTTTCTGACTCTTTAGCAAGTTAATATGATCTGCACTTTCCCCATTGGCCCCTTTATAGGGCGGAAAAGAGCATCTGTTTTTCCGGATTCTTGGAACAAGAAAAAGGAAATACACCTATGTATATGCCACTATTGTATAT	3	chrII_742620_A_C;chrII_742623_T_C;chrII_742721_C_G	122;119;21	112	0	firstTileUTR	TRUE
firstTileUTR_00731	YBR269C_5UTR_0	YBR269C_5UTR	chrII	742597	-	GGCGCGCCGGTTCTTTCTGACTCTTTAGCACGTCAATATGATCTGCACTTTCCCCATTGGCCCCTTTATAGGGCGGAAAAGAGCATCTGTTTTTCCGGATTCTTGGAACAAGAAAAAGGAAATACACCTATGTATATGCCACTATTGTATAT	3	chrII_742620_A_C;chrII_742623_T_C;chrII_742721_C_G	122;119;21	222	0	firstTileUTR	TRUE
firstTileUTR_00732	YBR270C_5UTR_0	YBR270C_5UTR	chrII	744670	-	GGCGCGCCGCAGCTCTATCCAGGCATTAAAATTGGTTCACCTATTTCTGATAGTAGTTTTTTTTTTTCCAATCGTAAATTTTTTCTTCAATTTCGCGATGAGCTACAAAATAATAGTAGTGCAATCTGTATATTACTTTTCAAGTATCTAAC	1	chrII_744718_GTT_GT	97	1	0	firstTileUTR	TRUE
firstTileUTR_00733	YBR270C_5UTR_0	YBR270C_5UTR	chrII	744670	-	GGCGCGCCGCAGCTCTATCCAGGCATTAAAATTGGTTCACCTATTTCTGATAGTAGTTTTTTTTTTCCAATCGTAAATTTTTTCTTCAATTTCGCGATGAGCTACAAAATAATAGTAGTGCAATCTGTATATTACTTTTCAAGTATCTAAC	1	chrII_744718_GTT_GT	97	2	0	firstTileUTR	TRUE
firstTileUTR_00734	YBR271W_5UTR_0	YBR271W_5UTR	chrII	744821	+	GGCGCGCCGCATGAGTTAGATACTTGAAAAGTAATATACAGATTGCACTACTATTATTTTGTAGCTCATCGCGAAATTGAAGAAAAAATTTACGATTGGAAAAAAAAAAACTACTATCAGAAATAGGTGAACCAATTTTAATGCCTGGATAG	2	chrII_744718_GTT_GT;chrII_744816_C_T	42;140	11	0	firstTileUTR	FALSE
firstTileUTR_00735	YBR271W_5UTR_0	YBR271W_5UTR	chrII	744821	+	GGCGCGCCGCATGAGTTAGATACTTGAAAAGTAATATACAGATTGCACTACTATTATTTTGTAGCTCATCGCGAAATTGAAGAAAAAATTTACGATTGGAAAAAAAAAACTACTATCAGAAATAGGTGAACCAATTTTAATGCCTGGATAG	2	chrII_744718_GTT_GT;chrII_744816_C_T	42;140	21	0	firstTileUTR	FALSE
firstTileUTR_00736	YBR271W_5UTR_0	YBR271W_5UTR	chrII	744821	+	GGCGCGCCGCATAAGTTAGATACTTGAAAAGTAATATACAGATTGCACTACTATTATTTTGTAGCTCATCGCGAAATTGAAGAAAAAATTTACGATTGGAAAAAAAAAAACTACTATCAGAAATAGGTGAACCAATTTTAATGCCTGGATAG	2	chrII_744718_GTT_GT;chrII_744816_C_T	42;140	12	0	firstTileUTR	FALSE
firstTileUTR_00737	YBR271W_5UTR_0	YBR271W_5UTR	chrII	744821	+	GGCGCGCCGCATAAGTTAGATACTTGAAAAGTAATATACAGATTGCACTACTATTATTTTGTAGCTCATCGCGAAATTGAAGAAAAAATTTACGATTGGAAAAAAAAAACTACTATCAGAAATAGGTGAACCAATTTTAATGCCTGGATAG	2	chrII_744718_GTT_GT;chrII_744816_C_T	42;140	22	0	firstTileUTR	FALSE
firstTileUTR_00738	YBR272C_5UTR_0	YBR272C_5UTR	chrII	747810	-	GGCGCGCCGTTTCGCTGAGTTCTTTTGCGGTGATTATAGTTGTAAACTTGTTTTATTTTTAATCCCGTAATTAAGGTGTTTATATAAACTTACTCTTCAATTTTTCTATATGCATTTGAAACAGAAAAAAAGATATAAAAATACCAGCTATA	2	chrII_747841_GT_G;chrII_747926_G_GA	114;29	11	0	firstTileUTR	TRUE
firstTileUTR_00739	YBR272C_5UTR_0	YBR272C_5UTR	chrII	747810	-	GGCGCGCCGTTTCGCTGAGTTCTTTTGCGGTGATTATAGTGTAAACTTGTTTTATTTTTAATCCCGTAATTAAGGTGTTTATATAAACTTACTCTTCAATTTTTCTATATGCATTTGAAACAGAAAAAAAGATATAAAAATACCAGCTATA	2	chrII_747841_GT_G;chrII_747926_G_GA	114;29	21	0	firstTileUTR	TRUE
firstTileUTR_00740	YBR272C_5UTR_0	YBR272C_5UTR	chrII	747810	-	GGCGCGCCGTTTCGCTGAGTTCTTTTGCGGTGATTATAGTTGTAAACTTGTTTTATTTTTAATCCCGTAATTAAGGTGTTTATATAAACTTACTCTTCAATTTTTCTATATGCATTTGAAACAGAAAAAAAAGATATAAAAATACCAGCTATA	2	chrII_747841_GT_G;chrII_747926_G_GA	114;29	12	0	firstTileUTR	TRUE
firstTileUTR_00741	YBR272C_5UTR_0	YBR272C_5UTR	chrII	747810	-	GGCGCGCCGTTTCGCTGAGTTCTTTTGCGGTGATTATAGTGTAAACTTGTTTTATTTTTAATCCCGTAATTAAGGTGTTTATATAAACTTACTCTTCAATTTTTCTATATGCATTTGAAACAGAAAAAAAAGATATAAAAATACCAGCTATA	2	chrII_747841_GT_G;chrII_747926_G_GA	114;29	22	0	firstTileUTR	TRUE
firstTileUTR_00742	YBR281C_5UTR_0	YBR281C_5UTR	chrII	767655	-	GGCGCGCCGTTCGGTTTCTCGAAATAGTTTTTCACTTAAATAATTCAGTTACACACATTTTATTGATATTGGTGCCACAGCTTTTCGCGGCGCACAATGCGATTATCACTCAAGTTTATGGTAAAGTCGGTATTCCCTCTCATGAGAAAAAA	4	chrII_767663_T_C;chrII_767690_A_T;chrII_767691_T_C;chrII_767731_T_C	137;110;109;69	1111	0	firstTileUTR	TRUE
firstTileUTR_00743	YBR281C_5UTR_0	YBR281C_5UTR	chrII	767655	-	GGCGCGCCGTTCGGTCTCTCGAAATAGTTTTTCACTTAAATAATTCAGTTACACACATTTTATTGATATTGGTGCCACAGCTTTTCGCGGCGCACAATGCGATTATCACTCAAGTTTATGGTAAAGTCGGTATTCCCTCTCATGAGAAAAAA	4	chrII_767663_T_C;chrII_767690_A_T;chrII_767691_T_C;chrII_767731_T_C	137;110;109;69	2111	0	firstTileUTR	TRUE
firstTileUTR_00744	YBR281C_5UTR_0	YBR281C_5UTR	chrII	767655	-	GGCGCGCCGTTCGGTTTCTCGAAATAGTTTTTCACTTAAATATTTCAGTTACACACATTTTATTGATATTGGTGCCACAGCTTTTCGCGGCGCACAATGCGATTATCACTCAAGTTTATGGTAAAGTCGGTATTCCCTCTCATGAGAAAAAA	4	chrII_767663_T_C;chrII_767690_A_T;chrII_767691_T_C;chrII_767731_T_C	137;110;109;69	1211	0	firstTileUTR	TRUE
firstTileUTR_00745	YBR281C_5UTR_0	YBR281C_5UTR	chrII	767655	-	GGCGCGCCGTTCGGTTTCTCGAAATAGTTTTTCACTTAAATAACTCAGTTACACACATTTTATTGATATTGGTGCCACAGCTTTTCGCGGCGCACAATGCGATTATCACTCAAGTTTATGGTAAAGTCGGTATTCCCTCTCATGAGAAAAAA	4	chrII_767663_T_C;chrII_767690_A_T;chrII_767691_T_C;chrII_767731_T_C	137;110;109;69	1121	0	firstTileUTR	TRUE
firstTileUTR_00746	YBR281C_5UTR_0	YBR281C_5UTR	chrII	767655	-	GGCGCGCCGTTCGGTTTCTCGAAATAGTTTTTCACTTAAATAATTCAGTTACACACATTTTATTGATATTGGTGCCACAGCTTCTCGCGGCGCACAATGCGATTATCACTCAAGTTTATGGTAAAGTCGGTATTCCCTCTCATGAGAAAAAA	4	chrII_767663_T_C;chrII_767690_A_T;chrII_767691_T_C;chrII_767731_T_C	137;110;109;69	1112	0	firstTileUTR	TRUE
firstTileUTR_00747	YBR281C_5UTR_0	YBR281C_5UTR	chrII	767655	-	GGCGCGCCGTTCGGTCTCTCGAAATAGTTTTTCACTTAAATATCTCAGTTACACACATTTTATTGATATTGGTGCCACAGCTTCTCGCGGCGCACAATGCGATTATCACTCAAGTTTATGGTAAAGTCGGTATTCCCTCTCATGAGAAAAAA	4	chrII_767663_T_C;chrII_767690_A_T;chrII_767691_T_C;chrII_767731_T_C	137;110;109;69	2222	0	firstTileUTR	TRUE
firstTileUTR_00748	YBR282W_5UTR_0	YBR282W_5UTR	chrII	768202	+	GGCGCGCCGATTCCCGTAGTTTTTTTAAGCAAAAATTGGTGTATACTACTTCAATAGTCCTATCTTTTGTATTAATTCTAGCTTTTCAAAAATAATCCGTGAAACGTGATAATAATAATTATGTATCTCAAGAAAATCATCATCAAATAGCC	4	chrII_768073_A_AT;chrII_768165_T_A;chrII_768183_TA_T;chrII_768196_G_A	16;108;126;139	1111	0	firstTileUTR	TRUE
firstTileUTR_00749	YBR282W_5UTR_0	YBR282W_5UTR	chrII	768202	+	GGCGCGCCGATTCCCGTAGTTTTTTTAAGCAAAAATTGGTGTATACTACTTCAATAGTCCTATCTTTTGTATTAATTCTAGCTTTTCAAAAATAATCCGTGAAACGTGATAATAATAATTATGTATCTCAAGAAAAATCATCATCAAATAGCC	4	chrII_768073_A_AT;chrII_768165_T_A;chrII_768183_TA_T;chrII_768196_G_A	16;108;126;139	2111	0	firstTileUTR	TRUE
firstTileUTR_00750	YBR282W_5UTR_0	YBR282W_5UTR	chrII	768202	+	GGCGCGCCGATTCCCGTAGTTTTTTTAAGCAAAAATTGGTGTATTCTACTTCAATAGTCCTATCTTTTGTATTAATTCTAGCTTTTCAAAAATAATCCGTGAAACGTGATAATAATAATTATGTATCTCAAGAAAATCATCATCAAATAGCC	4	chrII_768073_A_AT;chrII_768165_T_A;chrII_768183_TA_T;chrII_768196_G_A	16;108;126;139	1211	0	firstTileUTR	TRUE
firstTileUTR_00751	YBR282W_5UTR_0	YBR282W_5UTR	chrII	768202	+	GGCGCGCCGATTCCCGTAGTTTTTTAAGCAAAAATTGGTGTATACTACTTCAATAGTCCTATCTTTTGTATTAATTCTAGCTTTTCAAAAATAATCCGTGAAACGTGATAATAATAATTATGTATCTCAAGAAAATCATCATCAAATAGCC	4	chrII_768073_A_AT;chrII_768165_T_A;chrII_768183_TA_T;chrII_768196_G_A	16;108;126;139	1121	0	firstTileUTR	TRUE
firstTileUTR_00752	YBR282W_5UTR_0	YBR282W_5UTR	chrII	768202	+	GGCGCGCCGATTCTCGTAGTTTTTTTAAGCAAAAATTGGTGTATACTACTTCAATAGTCCTATCTTTTGTATTAATTCTAGCTTTTCAAAAATAATCCGTGAAACGTGATAATAATAATTATGTATCTCAAGAAAATCATCATCAAATAGCC	4	chrII_768073_A_AT;chrII_768165_T_A;chrII_768183_TA_T;chrII_768196_G_A	16;108;126;139	1112	0	firstTileUTR	TRUE
firstTileUTR_00753	YBR282W_5UTR_0	YBR282W_5UTR	chrII	768202	+	GGCGCGCCGATTCTCGTAGTTTTTTAAGCAAAAATTGGTGTATTCTACTTCAATAGTCCTATCTTTTGTATTAATTCTAGCTTTTCAAAAATAATCCGTGAAACGTGATAATAATAATTATGTATCTCAAGAAAAATCATCATCAAATAGCC	4	chrII_768073_A_AT;chrII_768165_T_A;chrII_768183_TA_T;chrII_768196_G_A	16;108;126;139	2222	0	firstTileUTR	TRUE
firstTileUTR_00754	YBR285W_5UTR_0	YBR285W_5UTR	chrII	773771	+	GGCGCGCCATCTACTTACTTATTTGTTTATATATTCCATTAGTTTACTTATCTTTATCCTTAACCTTTTTTTTTTGTGTGTGTGGGGAAGGGCGGTACATAATATTAGCGTCACAATATGCGCCCCTCGAAGAAACATGAGCGAATTCACGC	2	chrII_773629_G_T;chrII_773703_C_CAA	3;77	11	0	firstTileUTR	TRUE
firstTileUTR_00755	YBR285W_5UTR_0	YBR285W_5UTR	chrII	773771	+	GGCGCGCCATCTACTTACTTATTTGTTTATATATTCCATTAGTTTACTTATCTTTATCCTTAACCTTTTTTTTTTGTGTGTGTGGGGAAGGGCGGTACATAATATTAGCGTCACAATATGCGCCCCTCGAAGAAACATGAGCGAATTCAAGC	2	chrII_773629_G_T;chrII_773703_C_CAA	3;77	21	0	firstTileUTR	TRUE
firstTileUTR_00756	YBR285W_5UTR_0	YBR285W_5UTR	chrII	773771	+	GGCGCGCCATCTACTTACTTATTTGTTTATATATTCCATTAGTTTACTTATCTTTATCCTTAACCTTTTTTTTTTTTGTGTGTGTGGGGAAGGGCGGTACATAATATTAGCGTCACAATATGCGCCCCTCGAAGAAACATGAGCGAATTCACGC	2	chrII_773629_G_T;chrII_773703_C_CAA	3;77	12	0	firstTileUTR	TRUE
firstTileUTR_00757	YBR285W_5UTR_0	YBR285W_5UTR	chrII	773771	+	GGCGCGCCATCTACTTACTTATTTGTTTATATATTCCATTAGTTTACTTATCTTTATCCTTAACCTTTTTTTTTTTTGTGTGTGTGGGGAAGGGCGGTACATAATATTAGCGTCACAATATGCGCCCCTCGAAGAAACATGAGCGAATTCAAGC	2	chrII_773629_G_T;chrII_773703_C_CAA	3;77	22	0	firstTileUTR	TRUE
firstTileUTR_00758	YCL056C_5UTR_0	YCL056C_5UTR	chrIII	27361	-	GGCGCGCCAACTTTCTTTTCTTCTTCCTTTACTTTTATTCATCTCCTCTTTACTTCTTACCTCAGAGTCGAACATTGAAATCATTTCCCGCGAATTTTTCGATTATAATTACCCTTTCTACTTAACAAGAAGCAATAAGAGCAAAGGGGCGA	1	chrIII_27364_C_CTTTCT	142	1	0	firstTileUTR	TRUE
firstTileUTR_00759	YCL056C_5UTR_0	YCL056C_5UTR	chrIII	27361	-	GGCGCGCCAACTTTCTTTTCTTTTCTTCTTCCTTTACTTTTATTCATCTCCTCTTTACTTCTTACCTCAGAGTCGAACATTGAAATCATTTCCCGCGAATTTTTCGATTATAATTACCCTTTCTACTTAACAAGAAGCAATAAGAGCAAAGGGGCGA	1	chrIII_27364_C_CTTTCT	142	2	0	firstTileUTR	TRUE
firstTileUTR_00760	YCL035C_5UTR_0	YCL035C_5UTR	chrIII	61195	-	GGCGCGCCTCTATTTGTATAATTATGCGAATGCTCGTATAAGTACTGCACGAAGTTCTTTATTTTATGCTAAAGTCCCTTTTTATATTATATAAACTTTTCATTTATTTTATATATTTACTCCTTTCAAGACAAAATTCCCACATCACGTGA	1	chrIII_61224_T_A	116	1	0	firstTileUTR	TRUE
firstTileUTR_00761	YCL035C_5UTR_0	YCL035C_5UTR	chrIII	61195	-	GGCGCGCCTCTATTTGTATAATTATGCGAATGCTCGAATAAGTACTGCACGAAGTTCTTTATTTTATGCTAAAGTCCCTTTTTATATTATATAAACTTTTCATTTATTTTATATATTTACTCCTTTCAAGACAAAATTCCCACATCACGTGA	1	chrIII_61224_T_A	116	2	0	firstTileUTR	TRUE
firstTileUTR_00762	YCL034W_5UTR_0	YCL034W_5UTR	chrIII	61602	+	GGCGCGCCGTTGTCTTCATCCTTAGAAAGGATACCACATTGATAAACAACATATATAAAGTTTAACTATTACCTTGATCACTTTACACGTCAAGGTCAAAACAGTTTCATAGTTATCACCTTGAAGTATGGCTCCATCATCTATAAAACATG	2	chrIII_61460_TG_T;chrIII_61462_T_C	3;5	11	0	firstTileUTR	FALSE
firstTileUTR_00763	YCL034W_5UTR_0	YCL034W_5UTR	chrIII	61602	+	GGCGCGCCGTTGTCTTCATCCTTAGAAAGGATACCACATTGATAAACAACATATATAAAGTTTAACTATTACCTTGATCACTTTACACGTCAAGGTCAAAACAGTTTCATAGTTATCACCTTGAAGTATGGCTCCATCATCTATAAAAATG	2	chrIII_61460_TG_T;chrIII_61462_T_C	3;5	21	0	firstTileUTR	FALSE
firstTileUTR_00764	YCL034W_5UTR_0	YCL034W_5UTR	chrIII	61602	+	GGCGCGCCGTTGTCTTCATCCTTAGAAAGGATACCACATTGATAAACAACATATATAAAGTTTAACTATTACCTTGATCACTTTACACGTCAAGGTCAAAACAGTTTCATAGTTATCACCTTGAAGTATGGCTCCATCATCTATAAAGCATG	2	chrIII_61460_TG_T;chrIII_61462_T_C	3;5	12	0	firstTileUTR	FALSE
firstTileUTR_00765	YCL034W_5UTR_0	YCL034W_5UTR	chrIII	61602	+	GGCGCGCCGTTGTCTTCATCCTTAGAAAGGATACCACATTGATAAACAACATATATAAAGTTTAACTATTACCTTGATCACTTTACACGTCAAGGTCAAAACAGTTTCATAGTTATCACCTTGAAGTATGGCTCCATCATCTATAAAGATG	2	chrIII_61460_TG_T;chrIII_61462_T_C	3;5	22	0	firstTileUTR	FALSE
firstTileUTR_00766	YCL026C-B_5UTR_0	YCL026C-B_5UTR	chrIII	74021	-	GGCGCGCCAGGATACTTCAGTCTACGAAAAAAGTACAAATTATGTAGTCAGTTCCTTCAGTATGGTGTCCTTATATACTGTAGTTTGGACAAGGTGCAAATGCCAAGACCCTAGCCCGAAAAGCTCGAGGCACCCCAGGATCTTTTTCTTTA	2	chrIII_74074_T_C;chrIII_74146_C_G	92;20	11	0	firstTileUTR	FALSE
firstTileUTR_00767	YCL026C-B_5UTR_0	YCL026C-B_5UTR	chrIII	74021	-	GGCGCGCCAGGATACTTCAGTCTACGAAAAAAGTACAAATTATGTAGTCAGTTCCTTCAGCATGGTGTCCTTATATACTGTAGTTTGGACAAGGTGCAAATGCCAAGACCCTAGCCCGAAAAGCTCGAGGCACCCCAGGATCTTTTTCTTTA	2	chrIII_74074_T_C;chrIII_74146_C_G	92;20	21	0	firstTileUTR	FALSE
firstTileUTR_00768	YCL026C-B_5UTR_0	YCL026C-B_5UTR	chrIII	74021	-	GGCGCGCCAGGATACTTCAGTCTACGAAAAAAGTACAAATTATGTAGTCAGTTCCTTCAGTATGGTGTCCTTATATACTGTAGTTTGGACAAGGTGCAAATGCCAAGACCCTAGCCCGAAAAGCTCGAGGCAGCCCAGGATCTTTTTCTTTA	2	chrIII_74074_T_C;chrIII_74146_C_G	92;20	12	0	firstTileUTR	FALSE
firstTileUTR_00769	YCL026C-B_5UTR_0	YCL026C-B_5UTR	chrIII	74021	-	GGCGCGCCAGGATACTTCAGTCTACGAAAAAAGTACAAATTATGTAGTCAGTTCCTTCAGCATGGTGTCCTTATATACTGTAGTTTGGACAAGGTGCAAATGCCAAGACCCTAGCCCGAAAAGCTCGAGGCAGCCCAGGATCTTTTTCTTTA	2	chrIII_74074_T_C;chrIII_74146_C_G	92;20	22	0	firstTileUTR	FALSE
firstTileUTR_00770	YCL026C-A_5UTR_0	YCL026C-A_5UTR	chrIII	75362	-	GGCGCGCCATATCTCTCTTCGATCACAACATGGGTGGAGACAAACACAAAGTAGTGATGACCCACTCAGGTGTTAAAGTGTGTCATATCTGCAAATGACACTGTATTTTTTTTTCCTTTGCCATTTATTGTCGCAGTAAGGAAAAGCGCAGA	1	chrIII_75503_C_T	4	1	0	firstTileUTR	TRUE
firstTileUTR_00771	YCL026C-A_5UTR_0	YCL026C-A_5UTR	chrIII	75362	-	GGCGCGCCATATCTCTCTTCGATCACAACATGGGTGGAGACAAACACAAAGTAGTGATGACCCACTCAGGTGTTAAAGTGTGTCATATCTGCAAATGACACTGTATTTTTTTTTCCTTTGCCATTTATTGTCGCAGTAAGGAAAAGCGTAGA	1	chrIII_75503_C_T	4	2	0	firstTileUTR	TRUE
firstTileUTR_00772	YCL021W-A_5UTR_0	YCL021W-A_5UTR	chrIII	83530	+	GGCGCGCCACTTCTCAGGGATTCAAGGAAATCCCGAATAACTTTGACAAGTCAAATATTTGCCGTGAGTCGCATAATCGAATACCACATAGGGTTTTTGTGGTTCTCGAGCATGGAGGGAAACCGTCACGCATTCTTGGCATTTTTTCAAAG	1	chrIII_83421_C_T	36	1	0	firstTileUTR	TRUE
firstTileUTR_00773	YCL021W-A_5UTR_0	YCL021W-A_5UTR	chrIII	83530	+	GGCGCGCCACTTCTCAGGGATTCAAGGAAATCCCGAATAACTTTGACAAGTCAAATATTTGCCGTGAGTCGCATAATCGAATACCACATAGGGTTTTTGTGGTTCTCGAGCATGGAAGGAAACCGTCACGCATTCTTGGCATTTTTTCAAAG	1	chrIII_83421_C_T	36	2	0	firstTileUTR	FALSE
firstTileUTR_00774	YCL018W_5UTR_0	YCL018W_5UTR	chrIII	91296	+	GGCGCGCCATATATATTGCTGAAATGTAAAAGGTAAGAAAAGTTAGAAAGTAAGACGATTGCTAACCACCTATTGGAAAAAACAATAGGTCCTTAAATAATATTGTCAACTTCAAGTATTGTGATGCAAGCATTTAGTCATGAACGCTTCTC	1	chrIII_91287_A_AATAT	136	1	0	firstTileUTR	FALSE
firstTileUTR_00775	YCL018W_5UTR_0	YCL018W_5UTR	chrIII	91296	+	GGCGCGCCATATATATATATTGCTGAAATGTAAAAGGTAAGAAAAGTTAGAAAGTAAGACGATTGCTAACCACCTATTGGAAAAAACAATAGGTCCTTAAATAATATTGTCAACTTCAAGTATTGTGATGCAAGCATTTAGTCATGAACGCTTCTC	1	chrIII_91287_A_AATAT	136	2	0	firstTileUTR	FALSE
firstTileUTR_00776	YCL017C_5UTR_0	YCL017C_5UTR	chrIII	94364	-	GGCGCGCCGGTCTTTACTCTGAGTGAGTTACTTAGATAGTCATCATATATCCCTGGGCGATGGCCTTACTATTTGTCAGCGACCGTATCTAAAATTGGTAGGTCACTATCAACTATTGCGGGTAATAGGGTGCATAATAGTATTGTAATATA	3	chrIII_94376_T_C;chrIII_94470_T_G;chrIII_94503_AAT_A	133;39;6	111	0	firstTileUTR	TRUE
firstTileUTR_00777	YCL017C_5UTR_0	YCL017C_5UTR	chrIII	94364	-	GGCGCGCCGGTCTTTACTCCGAGTGAGTTACTTAGATAGTCATCATATATCCCTGGGCGATGGCCTTACTATTTGTCAGCGACCGTATCTAAAATTGGTAGGTCACTATCAACTATTGCGGGTAATAGGGTGCATAATAGTATTGTAATATA	3	chrIII_94376_T_C;chrIII_94470_T_G;chrIII_94503_AAT_A	133;39;6	211	0	firstTileUTR	TRUE
firstTileUTR_00778	YCL017C_5UTR_0	YCL017C_5UTR	chrIII	94364	-	GGCGCGCCGGTCTTTACTCTGAGTGAGTTACTTAGATAGTCATCATATATCCCTGGGCGATGGCCTTACTATTTGTCAGCGACCGTATCTAAAATTGGTAGGTCACTATCAACGATTGCGGGTAATAGGGTGCATAATAGTATTGTAATATA	3	chrIII_94376_T_C;chrIII_94470_T_G;chrIII_94503_AAT_A	133;39;6	121	0	firstTileUTR	TRUE
firstTileUTR_00779	YCL017C_5UTR_0	YCL017C_5UTR	chrIII	94364	-	GGCGCGCCGGTCTTTACTCTGAGTGAGTTACTTAGATAGTCATCATATATCCCTGGGCGATGGCCTTACTATTTGTCAGCGACCGTATCTAAAATTGGTAGGTCACTATCAACTATTGCGGGTAATAGGGTGCATAATAGTATTGTAATA	3	chrIII_94376_T_C;chrIII_94470_T_G;chrIII_94503_AAT_A	133;39;6	112	0	firstTileUTR	TRUE
firstTileUTR_00780	YCL017C_5UTR_0	YCL017C_5UTR	chrIII	94364	-	GGCGCGCCGGTCTTTACTCCGAGTGAGTTACTTAGATAGTCATCATATATCCCTGGGCGATGGCCTTACTATTTGTCAGCGACCGTATCTAAAATTGGTAGGTCACTATCAACGATTGCGGGTAATAGGGTGCATAATAGTATTGTAATA	3	chrIII_94376_T_C;chrIII_94470_T_G;chrIII_94503_AAT_A	133;39;6	222	0	firstTileUTR	TRUE
firstTileUTR_00781	YCL016C_5UTR_0	YCL016C_5UTR	chrIII	95792	-	GGCGCGCCGGTGGATTTTTACCGTTCATCTCATAGTGCTTTTTTAGTTTATTTTTCACTTTTTTCTGGTTATACTATACGCTGCCTACTGAAGCAATAAGCAAGAAACACAACAGTATAAAGGGACAAAGATAATAAACCGCCTACTACTAA	1	chrIII_95815_C_T	122	1	0	firstTileUTR	TRUE
firstTileUTR_00782	YCL016C_5UTR_0	YCL016C_5UTR	chrIII	95792	-	GGCGCGCCGGTGGATTTTTACCGTTCATCTTATAGTGCTTTTTTAGTTTATTTTTCACTTTTTTCTGGTTATACTATACGCTGCCTACTGAAGCAATAAGCAAGAAACACAACAGTATAAAGGGACAAAGATAATAAACCGCCTACTACTAA	1	chrIII_95815_C_T	122	2	0	firstTileUTR	TRUE
firstTileUTR_00783	YCL012C_5UTR_0	YCL012C_5UTR	chrIII	101822	-	GGCGCGCCAGCTTTTCTTCTCTTAATTGGTGGCAGTTTTTATATATTCAGTTTAGAATACCCTTTTTTTTTTTTTTTTTTTCTTCGCTTTTCGCATCTCATCGCTGGAAGTGGTGCTCTTTTACAGGGATTAAATAAGGTTATTCTTTTTGG	1	chrIII_101894_T_C	73	1	0	firstTileUTR	TRUE
firstTileUTR_00784	YCL012C_5UTR_0	YCL012C_5UTR	chrIII	101822	-	GGCGCGCCAGCTTTTCTTCTCTTAATTGGTGGCAGTTTTTATATATTCAGTTTAGAATACCCTTTTTTTTTTTTTTTTTCTCTTCGCTTTTCGCATCTCATCGCTGGAAGTGGTGCTCTTTTACAGGGATTAAATAAGGTTATTCTTTTTGG	1	chrIII_101894_T_C	73	2	0	firstTileUTR	TRUE
firstTileUTR_00785	YCL009C_5UTR_0	YCL009C_5UTR	chrIII	105563	-	GGCGCGCCAGTGAGCTCAGATGTTCTAAAGATTCTGTATATACGAACTATGTACTTCCATATATACCATTCCCCGTTCTTGTTAGGTAAAGGTTAAAAAAATATTTTTTATGGCACTTCGGCGATGCGAAAGAAAGTGAGTCACGATAAC	1	chrIII_105664_T_TGTTTTCG	42	1	0	firstTileUTR	FALSE
firstTileUTR_00786	YCL009C_5UTR_0	YCL009C_5UTR	chrIII	105563	-	GGCGCGCCAGTGAGCTCAGATGTTCTAAAGATTCTGTATATACGAACTATGTACTTCCATATATACCATTCCCCGTTCTTGTTAGGTAAAGGTTAAAAAAATATTTTTTGTTTTCGATGGCACTTCGGCGATGCGAAAGAAAGTGAGTCACGATAAC	1	chrIII_105664_T_TGTTTTCG	42	2	0	firstTileUTR	TRUE
firstTileUTR_00787	YCR012W_5UTR_0	YCR012W_5UTR	chrIII	137706	+	GGCGCGCCGATGATCTGTAAAAAAGAGAAAAAGAAAGCATCTAAGAACTTGAAAAACTACGAATTAGAAAAGACCAAATATGTATTTCTTGCATTGACCAATTTATGCAAGTTTATATATATGTAAATGTAAGTTTCACGAGGTTCTACTAA	1	chrIII_137654_G_T	93	1	0	firstTileUTR	FALSE
firstTileUTR_00788	YCR012W_5UTR_0	YCR012W_5UTR	chrIII	137706	+	GGCGCGCCGATGATCTGTAAAAAAGAGAAAAAGAAAGCATCTAAGAACTTGAAAAACTAAGAATTAGAAAAGACCAAATATGTATTTCTTGCATTGACCAATTTATGCAAGTTTATATATATGTAAATGTAAGTTTCACGAGGTTCTACTAA	1	chrIII_137654_G_T	93	2	0	firstTileUTR	FALSE
firstTileUTR_00789	YCR019W_5UTR_0	YCR019W_5UTR	chrIII	152689	+	GGCGCGCCATTGTCTTGATATGACATTTATTTGTCAGCTGAGGATCTCGGAAATTTTAAATGTAAAAAGGAAGTTCCCTAGAGTAATCGTAGCATTATCATACATTCAGATTCACAGAGCAACATGCAAGTTTTAAAATACATTATTAAGTT	1	chrIII_152546_A_G	2	1	0	firstTileUTR	FALSE
firstTileUTR_00790	YCR019W_5UTR_0	YCR019W_5UTR	chrIII	152689	+	GGCGCGCCATTGTCTTGATATGACATTTATTTGTCAGCTGAGGATCTCGGAAATTTTAAATGTAAAAAGGAAGTTCCCTAGAGTAATCGTAGCATTATCATACATTCAGATTCACAGAGCAACATGCAAGTTTTAAAATACATTATTAAGCT	1	chrIII_152546_A_G	2	2	0	firstTileUTR	FALSE
firstTileUTR_00791	YCR022C_5UTR_0	YCR022C_5UTR	chrIII	158029	-	GGCGCGCCGACAGGACGTATTCAGCGCAGTTGAGGAAAATTAACATATGACATGCGCAGGAAATAAGTGCTCAAGTTTTCTACTTTTGAAGAAAGGACTTTGGTTTACTTGCCTACTATCTCCATGTCAAGTACTCGGTTGTATGATGTTAA	1	chrIII_158141_C_T	33	1	0	firstTileUTR	TRUE
firstTileUTR_00792	YCR022C_5UTR_0	YCR022C_5UTR	chrIII	158029	-	GGCGCGCCGACAGGACGTATTCAGCGCAGTTGAGGAAAATTAACATATGACATGCGCAGGAAATAAGTGCTCAAGTTTTCTACTTTTGAAGAAAGGACTTTGGTTTACTTGCCTACTATTTCCATGTCAAGTACTCGGTTGTATGATGTTAA	1	chrIII_158141_C_T	33	2	0	firstTileUTR	TRUE
firstTileUTR_00793	YCR024C_5UTR_0	YCR024C_5UTR	chrIII	162241	-	GGCGCGCCGTTCTCTTTCTTTCTCTCTTAGTAAGCGATAAGTCGAGCTCTACTTAAATTGTGGTACGTTTTCTTTTTTTCCTATAATATAAAAAAGATAAAAAATCAGGACGAGAAAAAGTAGATCATAACTATAAGTTGTGCATACTCATA	1	chrIII_162361_T_C	25	1	0	firstTileUTR	TRUE
firstTileUTR_00794	YCR024C_5UTR_0	YCR024C_5UTR	chrIII	162241	-	GGCGCGCCGTTCTCTTTCTTTCTCTCTTAGTAAGCGATAAGTCGAGCTCTACTTAAATTGTGGTACGTTTTCTTTTTTTCCTATAATATAAAAAAGATAAAAAATCAGGACGAGAAAAAGTAGATCACAACTATAAGTTGTGCATACTCATA	1	chrIII_162361_T_C	25	2	0	firstTileUTR	TRUE
firstTileUTR_00795	YCR024C-B_5UTR_0	YCR024C-B_5UTR	chrIII	162876	-	GGCGCGCCTCATGTTCTAGAATGGATATAAACAAAGATGAAGGGGACAGGAAATAAAATGGCTCGCTCCGCCCTTTTTAGAATCTTTGCAATCCTCTTTGTCTAGCTTGCCATTTTCTGTAGATAATGGTAGCAATAATGGCAATACAAGCC	1	chrIII_162941_C_A	80	1	0	firstTileUTR	FALSE
firstTileUTR_00796	YCR024C-B_5UTR_0	YCR024C-B_5UTR	chrIII	162876	-	GGCGCGCCTCATGTTCTAGAATGGATATAAACAAAGATGAAGGGGACAGGAAATAAAATGGCTCGCTCCGCCATTTTTAGAATCTTTGCAATCCTCTTTGTCTAGCTTGCCATTTTCTGTAGATAATGGTAGCAATAATGGCAATACAAGCC	1	chrIII_162941_C_A	80	2	0	firstTileUTR	FALSE
firstTileUTR_00797	YCR031C_5UTR_0	YCR031C_5UTR	chrIII	178241	-	GGCGCGCCACTCTCCTTGGGTTTAAAATAGAATCTTCATTAAAAAGTGCTTTCTGTAATATATAGTGATTAATAACCAATTCATTTCAACTGTCTACCTGAGGAAGCCCTGCACCATATGGAATGAGCCAGGAGGCGGGATGGTCTGCCGCA	1	chrIII_178367_G_A	19	1	0	firstTileUTR	FALSE
firstTileUTR_00798	YCR031C_5UTR_0	YCR031C_5UTR	chrIII	178241	-	GGCGCGCCACTCTCCTTGGGTTTAAAATAGAATCTTCATTAAAAAGTGCTTTCTGTAATATATAGTGATTAATAACCAATTCATTTCAACTGTCTACCTGAGGAAGCCCTGCACCATATGGAATGAGCCAGGAAGCGGGATGGTCTGCCGCA	1	chrIII_178367_G_A	19	2	0	firstTileUTR	FALSE
firstTileUTR_00799	YCR035C_5UTR_0	YCR035C_5UTR	chrIII	193036	-	GGCGCGCCGTGAAACTACTGTCAAACTTATTTGTGTAACAATACTCATCGTCTAATTTGTCCATTATTGTTATATACTCTGTCATAAAAAAAGAAAGAAAAATCTTATACTTTCGTCGACTGTGATTTGAAAATCTCTCCAGATCAAACGGG	2	chrIII_193066_A_G;chrIII_193107_C_A	115;74	11	0	firstTileUTR	FALSE
firstTileUTR_00800	YCR035C_5UTR_0	YCR035C_5UTR	chrIII	193036	-	GGCGCGCCGTGAAACTACTGTCAAACTTATTTGTGTAGCAATACTCATCGTCTAATTTGTCCATTATTGTTATATACTCTGTCATAAAAAAAGAAAGAAAAATCTTATACTTTCGTCGACTGTGATTTGAAAATCTCTCCAGATCAAACGGG	2	chrIII_193066_A_G;chrIII_193107_C_A	115;74	21	0	firstTileUTR	FALSE
firstTileUTR_00801	YCR035C_5UTR_0	YCR035C_5UTR	chrIII	193036	-	GGCGCGCCGTGAAACTACTGTCAAACTTATTTGTGTAACAATACTCATCGTCTAATTTGTCCATTATTGTTATATACTATGTCATAAAAAAAGAAAGAAAAATCTTATACTTTCGTCGACTGTGATTTGAAAATCTCTCCAGATCAAACGGG	2	chrIII_193066_A_G;chrIII_193107_C_A	115;74	12	0	firstTileUTR	FALSE
firstTileUTR_00802	YCR035C_5UTR_0	YCR035C_5UTR	chrIII	193036	-	GGCGCGCCGTGAAACTACTGTCAAACTTATTTGTGTAGCAATACTCATCGTCTAATTTGTCCATTATTGTTATATACTATGTCATAAAAAAAGAAAGAAAAATCTTATACTTTCGTCGACTGTGATTTGAAAATCTCTCCAGATCAAACGGG	2	chrIII_193066_A_G;chrIII_193107_C_A	115;74	22	0	firstTileUTR	FALSE
firstTileUTR_00803	YCR037C_5UTR_0	YCR037C_5UTR	chrIII	197219	-	GGCGCGCCTTTGCTGCACCTTTATCTGAGAGCTGACTGCTTTTTTGGTGTGAAACACTGTTTTCTGGTAATAATTTTTCAATGCATCGGATTACTTTTCCCACGTGCGAAATCATCAATTAATTAGATTGAAAAAAGGGTAAGGGAAAATAA	1	chrIII_197306_T_C	58	1	0	firstTileUTR	TRUE
firstTileUTR_00804	YCR037C_5UTR_0	YCR037C_5UTR	chrIII	197219	-	GGCGCGCCTTTGCTGCACCTTTATCTGAGAGCTGACTGCTTTTTTGGTGTGAAACACTGTTTTCTGGTAATAATTTTTCAATGCATCGGATTACCTTTCCCACGTGCGAAATCATCAATTAATTAGATTGAAAAAAGGGTAAGGGAAAATAA	1	chrIII_197306_T_C	58	2	0	firstTileUTR	TRUE
firstTileUTR_00805	YCR046C_5UTR_0	YCR046C_5UTR	chrIII	210429	-	GGCGCGCCGGTTCTCTCTCCCTTTCAGCAGCTGCTCAGAGGGAAGACTCGATTCTTCTTCTTCTTCTTTACTGGGAGTTCCAAAGCACCAAAATTGAAAACCAAGAAAAAAAGGAAAATACATCACTACATAAAAGTGCGCGGAGCCATTGA	1	chrIII_210472_ATTC_A	102	1	0	firstTileUTR	FALSE
firstTileUTR_00806	YCR046C_5UTR_0	YCR046C_5UTR	chrIII	210429	-	GGCGCGCCGGTTCTCTCTCCCTTTCAGCAGCTGCTCAGAGGGAAGACTCGATTCTTCTTCTTCTTTACTGGGAGTTCCAAAGCACCAAAATTGAAAACCAAGAAAAAAAGGAAAATACATCACTACATAAAAGTGCGCGGAGCCATTGA	1	chrIII_210472_ATTC_A	102	2	0	firstTileUTR	FALSE
firstTileUTR_00807	YCR047C_5UTR_0	YCR047C_5UTR	chrIII	211611	-	GGCGCGCCGCTCTTCTTCTTCTGCTTCTTCTGCTTTTTTCCTCTTTATCACACTATGTATGTGCTGCTCATCTCTTCTTTTTATCGATAAAATTGAAAAATGTGAGATGGTGTAGAGTGAAAAAAAAAAAAAAATCTGGCTTGGCCATCAAA	1	chrIII_211722_GAA_GAAAA	34	1	0	firstTileUTR	TRUE
firstTileUTR_00808	YCR047C_5UTR_0	YCR047C_5UTR	chrIII	211611	-	GGCGCGCCGCTCTTCTTCTTCTGCTTCTTCTGCTTTTTTCCTCTTTATCACACTATGTATGTGCTGCTCATCTCTTCTTTTTATCGATAAAATTGAAAAATGTGAGATGGTGTAGAGTGAAAAAAAAAAAAAAAAATCTGGCTTGGCCATCAAA	1	chrIII_211722_GAA_GAAAA	34	2	0	firstTileUTR	TRUE
firstTileUTR_00809	YCR048W_5UTR_0	YCR048W_5UTR	chrIII	211875	+	GGCGCGCCGTGAGTGTGCCAATGGCGCCCCTTTCCTCCACCACGCTCGTCCTTCTTATATCATCCGCATGTTGCCAGGGTCTGCTGGGTGCTATTGTTCGCTAAACGAGTCCAACCACGGCCGGGTATTTGATGGCCAAGCCAGATTTTTTT	1	chrIII_211772_G_A	42	1	0	firstTileUTR	TRUE
firstTileUTR_00810	YCR048W_5UTR_0	YCR048W_5UTR	chrIII	211875	+	GGCGCGCCGTGAGTGTGCCAATGGCGCCCCTTTCCTCCACCACGCTCGTCCTTCTTATATCATCCGCATGTTGCCAGGGTCTGCTGGGTGCTATTGTTCGCTAAACGAGTTCAACCACGGCCGGGTATTTGATGGCCAAGCCAGATTTTTTT	1	chrIII_211772_G_A	42	2	0	firstTileUTR	TRUE
firstTileUTR_00811	YCR053W_5UTR_0	YCR053W_5UTR	chrIII	216656	+	GGCGCGCCGCTATACTACCAAATGGAAAAATATAAGATACACAATATAGATAGTATTAAAAAAACGTGTATACGTTATTGATAGAAATGACTATACATTTTGTCGAAAATTTTTCATTTTCTTCTATTTCCTCGTTGTAATGACTCTTTTGT	1	chrIII_216599_GT_G	88	1	0	firstTileUTR	TRUE
firstTileUTR_00812	YCR053W_5UTR_0	YCR053W_5UTR	chrIII	216656	+	GGCGCGCCGCTATACTACCAAATGGAAAAATATAAGATACACAATATAGATAGTATTAAAAAACGTGTATACGTTATTGATAGAAATGACTATACATTTTGTCGAAAATTTTTCATTTTCTTCTATTTCCTCGTTGTAATGACTCTTTTGT	1	chrIII_216599_GT_G	88	2	0	firstTileUTR	TRUE
firstTileUTR_00813	YCR059C_5UTR_0	YCR059C_5UTR	chrIII	224244	-	GGCGCGCCCTCTCTCTTTTTTTTTTCTTGTTACATATTCCTATATATATGTATATATATCTATATATATATATATCCCAGCGTATATGACTGCACAAGACGCAATTTTCTTGAACGGTTTTTTCTTTTCAGCACTGCGAAAGAGAGAGCAAC	1	chrIII_224310_A_G	79	1	0	firstTileUTR	TRUE
firstTileUTR_00814	YCR059C_5UTR_0	YCR059C_5UTR	chrIII	224244	-	GGCGCGCCCTCTCTCTTTTTTTTTTCTTGTTACATATTCCTATATATATGTATATATATCTATATATATATATGTCCCAGCGTATATGACTGCACAAGACGCAATTTTCTTGAACGGTTTTTTCTTTTCAGCACTGCGAAAGAGAGAGCAAC	1	chrIII_224310_A_G	79	2	0	firstTileUTR	TRUE
firstTileUTR_00815	YCR067C_5UTR_0	YCR067C_5UTR	chrIII	236441	-	GGCGCGCCAGGTTACTTGAAGCGTTCACAGTTCTCATTTACACTGTACAATTCTCGAGATATAAATGAAAATTACTACAACCAAGAAAAAAGGACAGGAGGGCTAAAAGGATAATAAAATAGGGCAGTTACAAATGTGGTCAAAAATACTAG	1	chrIII_236451_G_A	135	1	0	firstTileUTR	FALSE
firstTileUTR_00816	YCR067C_5UTR_0	YCR067C_5UTR	chrIII	236441	-	GGCGCGCCAGGTTACTTAAAGCGTTCACAGTTCTCATTTACACTGTACAATTCTCGAGATATAAATGAAAATTACTACAACCAAGAAAAAAGGACAGGAGGGCTAAAAGGATAATAAAATAGGGCAGTTACAAATGTGGTCAAAAATACTAG	1	chrIII_236451_G_A	135	2	0	firstTileUTR	FALSE
firstTileUTR_00817	YCR068W_5UTR_0	YCR068W_5UTR	chrIII	237060	+	GGCGCGCCAAGGCTTTTAGGCTAGTCTTATGTAATAGAGAAAGTTCATCTATATCTACAGATTCTTATTATGTACTGTTGAACAAAGGTGCGGGTAACTGCGATCACACAATCACTTTTTTCCGGAAACGGCTGTCTTCAGCGAACAACAAT	2	chrIII_236969_A_G;chrIII_237018_A_G	54;103	11	0	firstTileUTR	TRUE
firstTileUTR_00818	YCR068W_5UTR_0	YCR068W_5UTR	chrIII	237060	+	GGCGCGCCAAGGCTTTTAGGCTAGTCTTATGTAATAGAGAAAGTTCATCTATATCTACAGATTCTTATTATGTACTGTTGAACAAAGGTGCGGGTAACCGCGATCACACAATCACTTTTTTCCGGAAACGGCTGTCTTCAGCGAACAACAAT	2	chrIII_236969_A_G;chrIII_237018_A_G	54;103	21	0	firstTileUTR	FALSE
firstTileUTR_00819	YCR068W_5UTR_0	YCR068W_5UTR	chrIII	237060	+	GGCGCGCCAAGGCTTTTAGGCTAGTCTTATGTAATAGAGAAAGTTCATCCATATCTACAGATTCTTATTATGTACTGTTGAACAAAGGTGCGGGTAACTGCGATCACACAATCACTTTTTTCCGGAAACGGCTGTCTTCAGCGAACAACAAT	2	chrIII_236969_A_G;chrIII_237018_A_G	54;103	12	0	firstTileUTR	FALSE
firstTileUTR_00820	YCR068W_5UTR_0	YCR068W_5UTR	chrIII	237060	+	GGCGCGCCAAGGCTTTTAGGCTAGTCTTATGTAATAGAGAAAGTTCATCCATATCTACAGATTCTTATTATGTACTGTTGAACAAAGGTGCGGGTAACCGCGATCACACAATCACTTTTTTCCGGAAACGGCTGTCTTCAGCGAACAACAAT	2	chrIII_236969_A_G;chrIII_237018_A_G	54;103	22	0	firstTileUTR	FALSE
firstTileUTR_00821	YCR071C_5UTR_0	YCR071C_5UTR	chrIII	240580	-	GGCGCGCCAGGTAAACGGGCACTTCTTTCAAAAGGTTTTCCTTCTTGCTGGAGCTATACTGCTTATAGTACCATATTTTAAATTCATACCAAGCCATTCGTACGCGATGACCATTATAGATCGACCTTGCGACACCATCATATTTAATATTC	2	chrIII_240607_G_A;chrIII_240608_T_A	118;117	11	0	firstTileUTR	TRUE
firstTileUTR_00822	YCR071C_5UTR_0	YCR071C_5UTR	chrIII	240580	-	GGCGCGCCAGGTAAACGGGCACTTCTTTCAAAAGATTTTCCTTCTTGCTGGAGCTATACTGCTTATAGTACCATATTTTAAATTCATACCAAGCCATTCGTACGCGATGACCATTATAGATCGACCTTGCGACACCATCATATTTAATATTC	2	chrIII_240607_G_A;chrIII_240608_T_A	118;117	21	0	firstTileUTR	TRUE
firstTileUTR_00823	YCR071C_5UTR_0	YCR071C_5UTR	chrIII	240580	-	GGCGCGCCAGGTAAACGGGCACTTCTTTCAAAAGGATTTCCTTCTTGCTGGAGCTATACTGCTTATAGTACCATATTTTAAATTCATACCAAGCCATTCGTACGCGATGACCATTATAGATCGACCTTGCGACACCATCATATTTAATATTC	2	chrIII_240607_G_A;chrIII_240608_T_A	118;117	12	0	firstTileUTR	TRUE
firstTileUTR_00824	YCR071C_5UTR_0	YCR071C_5UTR	chrIII	240580	-	GGCGCGCCAGGTAAACGGGCACTTCTTTCAAAAGAATTTCCTTCTTGCTGGAGCTATACTGCTTATAGTACCATATTTTAAATTCATACCAAGCCATTCGTACGCGATGACCATTATAGATCGACCTTGCGACACCATCATATTTAATATTC	2	chrIII_240607_G_A;chrIII_240608_T_A	118;117	22	0	firstTileUTR	TRUE
firstTileUTR_00825	YCR072C_5UTR_0	YCR072C_5UTR	chrIII	242378	-	GGCGCGCCTCGAGGTTACAAATATAAAAATCTTGTGATATATGTCTTTTAAAGATACTCTTTTTGAAGCTCATCGCATTTTTTTTTTTTTTTTCATTTTAAAATTTTTCACCGGTTTCTCGGGTAACAGCTCTAAATGAAATCTTGCCTTCA	3	chrIII_242407_A_G;chrIII_242447_ATTTT_ATT;chrIII_242483_G_A	116;76;40	111	0	firstTileUTR	TRUE
firstTileUTR_00826	YCR072C_5UTR_0	YCR072C_5UTR	chrIII	242378	-	GGCGCGCCTCGAGGTTACAAATATAAAAATCTTGTGGTATATGTCTTTTAAAGATACTCTTTTTGAAGCTCATCGCATTTTTTTTTTTTTTTTCATTTTAAAATTTTTCACCGGTTTCTCGGGTAACAGCTCTAAATGAAATCTTGCCTTCA	3	chrIII_242407_A_G;chrIII_242447_ATTTT_ATT;chrIII_242483_G_A	116;76;40	211	0	firstTileUTR	TRUE
firstTileUTR_00827	YCR072C_5UTR_0	YCR072C_5UTR	chrIII	242378	-	GGCGCGCCTCGAGGTTACAAATATAAAAATCTTGTGATATATGTCTTTTAAAGATACTCTTTTTGAAGCTCATCGCATTTTTTTTTTTTTTCATTTTAAAATTTTTCACCGGTTTCTCGGGTAACAGCTCTAAATGAAATCTTGCCTTCA	3	chrIII_242407_A_G;chrIII_242447_ATTTT_ATT;chrIII_242483_G_A	116;76;40	121	0	firstTileUTR	TRUE
firstTileUTR_00828	YCR072C_5UTR_0	YCR072C_5UTR	chrIII	242378	-	GGCGCGCCTCGAGGTTACAAATATAAAAATCTTGTGATATATGTCTTTTAAAGATACTCTTTTTGAAGCTCATCGCATTTTTTTTTTTTTTTTCATTTTAAAATTTTTCACCAGTTTCTCGGGTAACAGCTCTAAATGAAATCTTGCCTTCA	3	chrIII_242407_A_G;chrIII_242447_ATTTT_ATT;chrIII_242483_G_A	116;76;40	112	0	firstTileUTR	TRUE
firstTileUTR_00829	YCR072C_5UTR_0	YCR072C_5UTR	chrIII	242378	-	GGCGCGCCTCGAGGTTACAAATATAAAAATCTTGTGGTATATGTCTTTTAAAGATACTCTTTTTGAAGCTCATCGCATTTTTTTTTTTTTTCATTTTAAAATTTTTCACCAGTTTCTCGGGTAACAGCTCTAAATGAAATCTTGCCTTCA	3	chrIII_242407_A_G;chrIII_242447_ATTTT_ATT;chrIII_242483_G_A	116;76;40	222	0	firstTileUTR	TRUE
firstTileUTR_00830	YCR073C_5UTR_0	YCR073C_5UTR	chrIII	246648	-	GGCGCGCCAATTCTTATCGTATGTTGTTGCTGCTATTTTTATCCTATTGTTCCTGGCATCGCTTTTTTACATAAGGTACCAAGGCAAGAGAAAAGACCCGCGAAATTTTCAATTCGAGACATAGGGTTAATACGAAATATGTTAAGGTCTAG	1	chrIII_246789_C_A	4	1	0	firstTileUTR	TRUE
firstTileUTR_00831	YCR073C_5UTR_0	YCR073C_5UTR	chrIII	246648	-	GGCGCGCCAATTCTTATCGTATGTTGTTGCTGCTATTTTTATCCTATTGTTCCTGGCATCGCTTTTTTACATAAGGTACCAAGGCAAGAGAAAAGACCCGCGAAATTTTCAATTCGAGACATAGGGTTAATACGAAATATGTTAAGGTATAG	1	chrIII_246789_C_A	4	2	0	firstTileUTR	TRUE
firstTileUTR_00832	YCR073W-A_5UTR_0	YCR073W-A_5UTR	chrIII	246945	+	GGCGCGCCGCTTTCTGTTCTAGTCCATACCTACACTGGATATGACGATGATGATGCCACTATTATCATTGAAATTTGTTAGGAAAACCCCTGTAGCGCCCGCCCTATTTAAACCTAATTTCCCCAGGATGTCTAATCACATTTTCTTCATTT	3	chrIII_246813_T_G;chrIII_246818_T_A;chrIII_246853_G_A	13;18;53	111	0	firstTileUTR	TRUE
firstTileUTR_00833	YCR073W-A_5UTR_0	YCR073W-A_5UTR	chrIII	246945	+	GGCGCGCCGCTTTCTGTTCTAGTCCATACCTACACTGGATATGACGATGATGATGCCACTATTATCATTGAAATTTGTTAGGAAAACCCCTGTAGCGCCCGCCCTATTTAAACCTAATTTCCCCAGGATGTCTAATCACCTTTTCTTCATTT	3	chrIII_246813_T_G;chrIII_246818_T_A;chrIII_246853_G_A	13;18;53	211	0	firstTileUTR	TRUE
firstTileUTR_00834	YCR073W-A_5UTR_0	YCR073W-A_5UTR	chrIII	246945	+	GGCGCGCCGCTTTCTGTTCTAGTCCATACCTACACTGGATATGACGATGATGATGCCACTATTATCATTGAAATTTGTTAGGAAAACCCCTGTAGCGCCCGCCCTATTTAAACCTAATTTCCCCAGGATGTCTATTCACATTTTCTTCATTT	3	chrIII_246813_T_G;chrIII_246818_T_A;chrIII_246853_G_A	13;18;53	121	0	firstTileUTR	TRUE
firstTileUTR_00835	YCR073W-A_5UTR_0	YCR073W-A_5UTR	chrIII	246945	+	GGCGCGCCGCTTTCTGTTCTAGTCCATACCTACACTGGATATGACGATGATGATGCCACTATTATCATTGAAATTTGTTAGGAAAACCCCTGTAGCGCCTGCCCTATTTAAACCTAATTTCCCCAGGATGTCTAATCACATTTTCTTCATTT	3	chrIII_246813_T_G;chrIII_246818_T_A;chrIII_246853_G_A	13;18;53	112	0	firstTileUTR	TRUE
firstTileUTR_00836	YCR073W-A_5UTR_0	YCR073W-A_5UTR	chrIII	246945	+	GGCGCGCCGCTTTCTGTTCTAGTCCATACCTACACTGGATATGACGATGATGATGCCACTATTATCATTGAAATTTGTTAGGAAAACCCCTGTAGCGCCTGCCCTATTTAAACCTAATTTCCCCAGGATGTCTATTCACCTTTTCTTCATTT	3	chrIII_246813_T_G;chrIII_246818_T_A;chrIII_246853_G_A	13;18;53	222	0	firstTileUTR	TRUE
firstTileUTR_00837	YCR075C_5UTR_0	YCR075C_5UTR	chrIII	248825	-	GGCGCGCCGTTTGCTTTTGTTTGCTTTTAGTTTTTCTTCCCTTGTTTACATATGGAAACTCACCTTAAAATTTCAAGATTATCAAAAAATATAAAGGATTCCGCTATTAAAGGGCAATACCACAACCTCAAACCAAATCACCTAAACCAAAT	2	chrIII_248847_G_GTT;chrIII_248853_C_T	123;117	11	0	firstTileUTR	FALSE
firstTileUTR_00838	YCR075C_5UTR_0	YCR075C_5UTR	chrIII	248825	-	GGCGCGCCGTTTGCTTTTGTTTGCTTTTAGTTTTTTTCTTCCCTTGTTTACATATGGAAACTCACCTTAAAATTTCAAGATTATCAAAAAATATAAAGGATTCCGCTATTAAAGGGCAATACCACAACCTCAAACCAAATCACCTAAACCAAAT	2	chrIII_248847_G_GTT;chrIII_248853_C_T	123;117	21	0	firstTileUTR	TRUE
firstTileUTR_00839	YCR075C_5UTR_0	YCR075C_5UTR	chrIII	248825	-	GGCGCGCCGTTTGCTTTTGTTTGCTTTTAGTTTTTTTTCCCTTGTTTACATATGGAAACTCACCTTAAAATTTCAAGATTATCAAAAAATATAAAGGATTCCGCTATTAAAGGGCAATACCACAACCTCAAACCAAATCACCTAAACCAAAT	2	chrIII_248847_G_GTT;chrIII_248853_C_T	123;117	12	0	firstTileUTR	FALSE
firstTileUTR_00840	YCR075C_5UTR_0	YCR075C_5UTR	chrIII	248825	-	GGCGCGCCGTTTGCTTTTGTTTGCTTTTAGTTTTTTTTTTCCCTTGTTTACATATGGAAACTCACCTTAAAATTTCAAGATTATCAAAAAATATAAAGGATTCCGCTATTAAAGGGCAATACCACAACCTCAAACCAAATCACCTAAACCAAAT	2	chrIII_248847_G_GTT;chrIII_248853_C_T	123;117	22	0	firstTileUTR	TRUE
firstTileUTR_00841	YCR075W-A_5UTR_0	YCR075W-A_5UTR	chrIII	248961	+	GGCGCGCCAGGTGATTTGGTTTGAGGTTGTGGTATTGCCCTTTAATAGCGGAATCCTTTATATTTTTTGATAATCTTGAAATTTTAAGGTGAGTTTCCATATGTAAACAAGGGAAGAAAAACTAAAAGCAAACAAAAGCAAACGCGAAGCAA	2	chrIII_248847_G_GTT;chrIII_248853_C_T	31;37	11	0	firstTileUTR	FALSE
firstTileUTR_00842	YCR075W-A_5UTR_0	YCR075W-A_5UTR	chrIII	248961	+	GGCGCGCCAGGTGATTTGGTTTGAGGTTGTGGTATTGCCCTTTAATAGCGGAATCCTTTATATTTTTTGATAATCTTGAAATTTTAAGGTGAGTTTCCATATGTAAACAAGGGAAGAAAAAAACTAAAAGCAAACAAAAGCAAACGCGAAGCAA	2	chrIII_248847_G_GTT;chrIII_248853_C_T	31;37	21	0	firstTileUTR	FALSE
firstTileUTR_00843	YCR075W-A_5UTR_0	YCR075W-A_5UTR	chrIII	248961	+	GGCGCGCCAGGTGATTTGGTTTGAGGTTGTGGTATTGCCCTTTAATAGCGGAATCCTTTATATTTTTTGATAATCTTGAAATTTTAAGGTGAGTTTCCATATGTAAACAAGGGAAAAAAAACTAAAAGCAAACAAAAGCAAACGCGAAGCAA	2	chrIII_248847_G_GTT;chrIII_248853_C_T	31;37	12	0	firstTileUTR	FALSE
firstTileUTR_00844	YCR075W-A_5UTR_0	YCR075W-A_5UTR	chrIII	248961	+	GGCGCGCCAGGTGATTTGGTTTGAGGTTGTGGTATTGCCCTTTAATAGCGGAATCCTTTATATTTTTTGATAATCTTGAAATTTTAAGGTGAGTTTCCATATGTAAACAAGGGAAAAAAAAAACTAAAAGCAAACAAAAGCAAACGCGAAGCAA	2	chrIII_248847_G_GTT;chrIII_248853_C_T	31;37	22	0	firstTileUTR	FALSE
firstTileUTR_00845	YCR076C_5UTR_0	YCR076C_5UTR	chrIII	250067	-	GGCGCGCCGGTGGTATTATTGATGCTAATACGGGTTTTTTATGAAAAAAAAAGGATAACAAACTTATATAAACTTATATAAAAACATATACAATAAATGATCTACAAAGGGTAGGAAATAAAAAATAAGGGAGAAAAAAAAATACATGCGTA	1	chrIII_250185_T_A	27	1	0	firstTileUTR	FALSE
firstTileUTR_00846	YCR076C_5UTR_0	YCR076C_5UTR	chrIII	250067	-	GGCGCGCCGGTGGTATTATTGATGCTAATACGGGTTTTTTATGAAAAAAAAAGGATAACAAACTTATATAAACTTATATAAAAACATATACAATAAATGATCTACAAAGGGTAGGAAATAAAAAAAAAGGGAGAAAAAAAAATACATGCGTA	1	chrIII_250185_T_A	27	2	0	firstTileUTR	FALSE
firstTileUTR_00847	YCR082W_5UTR_0	YCR082W_5UTR	chrIII	258853	+	GGCGCGCCACTGATCTTGTAAGCGGATGAGCACTTTGTCTTAATCCTCCTTAACCATCGCTCATAAACCCCAGTTTTATAATCGGTGGCAAACATGTCATTTGGTACGGTATCATTTAGAGGAATCAATTGGTTGGGTATTAAAACTGACAC	4	chrIII_258780_T_G;chrIII_258781_T_C;chrIII_258828_GT_G;chrIII_258847_A_G	72;73;120;139	1111	0	firstTileUTR	TRUE
firstTileUTR_00848	YCR082W_5UTR_0	YCR082W_5UTR	chrIII	258853	+	GGCGCGCCACTGATCTTGTAAGCGGATGAGCACTTTGTCTTAATCCTCCTTAACCATCGCTCATAAACCCCAGTTTTATACTCGGTGGCAAACATGTCATTTGGTACGGTATCATTTAGAGGAATCAATTGGTTGGGTATTAAAACTGACAC	4	chrIII_258780_T_G;chrIII_258781_T_C;chrIII_258828_GT_G;chrIII_258847_A_G	72;73;120;139	2111	0	firstTileUTR	TRUE
firstTileUTR_00849	YCR082W_5UTR_0	YCR082W_5UTR	chrIII	258853	+	GGCGCGCCACTGATCTTGTAAGCGGATGAGCACTTTGTCTTAATCCTCCTTAACCATCGCTCATAAACCCCAGTTTTATGATCGGTGGCAAACATGTCATTTGGTACGGTATCATTTAGAGGAATCAATTGGTTGGGTATTAAAACTGACAC	4	chrIII_258780_T_G;chrIII_258781_T_C;chrIII_258828_GT_G;chrIII_258847_A_G	72;73;120;139	1211	0	firstTileUTR	TRUE
firstTileUTR_00850	YCR082W_5UTR_0	YCR082W_5UTR	chrIII	258853	+	GGCGCGCCACTGATCTTGTAAGCGGATGAGCCTTTGTCTTAATCCTCCTTAACCATCGCTCATAAACCCCAGTTTTATAATCGGTGGCAAACATGTCATTTGGTACGGTATCATTTAGAGGAATCAATTGGTTGGGTATTAAAACTGACAC	4	chrIII_258780_T_G;chrIII_258781_T_C;chrIII_258828_GT_G;chrIII_258847_A_G	72;73;120;139	1121	0	firstTileUTR	TRUE
firstTileUTR_00851	YCR082W_5UTR_0	YCR082W_5UTR	chrIII	258853	+	GGCGCGCCACTGACCTTGTAAGCGGATGAGCACTTTGTCTTAATCCTCCTTAACCATCGCTCATAAACCCCAGTTTTATAATCGGTGGCAAACATGTCATTTGGTACGGTATCATTTAGAGGAATCAATTGGTTGGGTATTAAAACTGACAC	4	chrIII_258780_T_G;chrIII_258781_T_C;chrIII_258828_GT_G;chrIII_258847_A_G	72;73;120;139	1112	0	firstTileUTR	TRUE
firstTileUTR_00852	YCR082W_5UTR_0	YCR082W_5UTR	chrIII	258853	+	GGCGCGCCACTGACCTTGTAAGCGGATGAGCCTTTGTCTTAATCCTCCTTAACCATCGCTCATAAACCCCAGTTTTATGCTCGGTGGCAAACATGTCATTTGGTACGGTATCATTTAGAGGAATCAATTGGTTGGGTATTAAAACTGACAC	4	chrIII_258780_T_G;chrIII_258781_T_C;chrIII_258828_GT_G;chrIII_258847_A_G	72;73;120;139	2222	0	firstTileUTR	TRUE
firstTileUTR_00853	YCR083W_5UTR_0	YCR083W_5UTR	chrIII	259543	+	GGCGCGCCGCTTTCTTTGGTTAGGGGGCTAGCTCATTTTATATCTCATCGGGGCAATTTTTTCCATCACAGAATACTAGGCAACAAAATCTGCAGAAGCACAATCCACATTTGGAATTAAAAGATAGTGAAAAATGTACATGAACCCCAACC	3	chrIII_259458_GC_G;chrIII_259489_A_G;chrIII_259496_T_C	60;91;98	111	0	firstTileUTR	FALSE
firstTileUTR_00854	YCR083W_5UTR_0	YCR083W_5UTR	chrIII	259543	+	GGCGCGCCGCTTTCTTTGGTTAGGGGGCTAGCTCATTTTATATCTCATCGGGGCAATTTTTTCCATCACAGAATACTAGGCAACAAAATCTCAGAAGCACAATCCACATTTGGAATTAAAAGATAGTGAAAAATGTACATGAACCCCAACC	3	chrIII_259458_GC_G;chrIII_259489_A_G;chrIII_259496_T_C	60;91;98	211	0	firstTileUTR	FALSE
firstTileUTR_00855	YCR083W_5UTR_0	YCR083W_5UTR	chrIII	259543	+	GGCGCGCCGCTTTCTTTGGTTAGGGGGCTAGCTCATTTTATATCTCATCGGGGCAATTTTTCCCATCACAGAATACTAGGCAACAAAATCTGCAGAAGCACAATCCACATTTGGAATTAAAAGATAGTGAAAAATGTACATGAACCCCAACC	3	chrIII_259458_GC_G;chrIII_259489_A_G;chrIII_259496_T_C	60;91;98	121	0	firstTileUTR	FALSE
firstTileUTR_00856	YCR083W_5UTR_0	YCR083W_5UTR	chrIII	259543	+	GGCGCGCCGCTTTCTTTGGTTAGGGGGCTAGCTCATTTTATATCTCATCGGGGCGATTTTTTCCATCACAGAATACTAGGCAACAAAATCTGCAGAAGCACAATCCACATTTGGAATTAAAAGATAGTGAAAAATGTACATGAACCCCAACC	3	chrIII_259458_GC_G;chrIII_259489_A_G;chrIII_259496_T_C	60;91;98	112	0	firstTileUTR	FALSE
firstTileUTR_00857	YCR083W_5UTR_0	YCR083W_5UTR	chrIII	259543	+	GGCGCGCCGCTTTCTTTGGTTAGGGGGCTAGCTCATTTTATATCTCATCGGGGCGATTTTTCCCATCACAGAATACTAGGCAACAAAATCTCAGAAGCACAATCCACATTTGGAATTAAAAGATAGTGAAAAATGTACATGAACCCCAACC	3	chrIII_259458_GC_G;chrIII_259489_A_G;chrIII_259496_T_C	60;91;98	222	0	firstTileUTR	FALSE
firstTileUTR_00858	YCR087C-A_5UTR_0	YCR087C-A_5UTR	chrIII	264503	-	GGCGCGCCGCTGTTGTATACAGAATACTCTTAGAGCTCATCGCAAGTTAAAAATTTTCAATTTTTTTTCACTTTTTCCCGTCAAGGCAAAAAGCAACCAAAAGAGAATGAACCTTTATTTTTGATTTATTTATTATGAGATGCTGCTAGTCC	3	chrIII_264610_T_C;chrIII_264634_G_A;chrIII_264642_T_C	38;14;6	111	0	firstTileUTR	TRUE
firstTileUTR_00859	YCR087C-A_5UTR_0	YCR087C-A_5UTR	chrIII	264503	-	GGCGCGCCGCTGTTGTATACAGAATACTCTTAGAGCTCATCGCAAGTTAAAAATTTTCAATTTTTTTTCACTTTTTCCCGTCAAGGCAAAAAGCAACCAAAAGAGAATGAACCTCTATTTTTGATTTATTTATTATGAGATGCTGCTAGTCC	3	chrIII_264610_T_C;chrIII_264634_G_A;chrIII_264642_T_C	38;14;6	211	0	firstTileUTR	TRUE
firstTileUTR_00860	YCR087C-A_5UTR_0	YCR087C-A_5UTR	chrIII	264503	-	GGCGCGCCGCTGTTGTATACAGAATACTCTTAGAGCTCATCGCAAGTTAAAAATTTTCAATTTTTTTTCACTTTTTCCCGTCAAGGCAAAAAGCAACCAAAAGAGAATGAACCTTTATTTTTGATTTATTTATTATGAAATGCTGCTAGTCC	3	chrIII_264610_T_C;chrIII_264634_G_A;chrIII_264642_T_C	38;14;6	121	0	firstTileUTR	TRUE
firstTileUTR_00861	YCR087C-A_5UTR_0	YCR087C-A_5UTR	chrIII	264503	-	GGCGCGCCGCTGTTGTATACAGAATACTCTTAGAGCTCATCGCAAGTTAAAAATTTTCAATTTTTTTTCACTTTTTCCCGTCAAGGCAAAAAGCAACCAAAAGAGAATGAACCTTTATTTTTGATTTATTTATTATGAGATGCTGCCAGTCC	3	chrIII_264610_T_C;chrIII_264634_G_A;chrIII_264642_T_C	38;14;6	112	0	firstTileUTR	TRUE
firstTileUTR_00862	YCR087C-A_5UTR_0	YCR087C-A_5UTR	chrIII	264503	-	GGCGCGCCGCTGTTGTATACAGAATACTCTTAGAGCTCATCGCAAGTTAAAAATTTTCAATTTTTTTTCACTTTTTCCCGTCAAGGCAAAAAGCAACCAAAAGAGAATGAACCTCTATTTTTGATTTATTTATTATGAAATGCTGCCAGTCC	3	chrIII_264610_T_C;chrIII_264634_G_A;chrIII_264642_T_C	38;14;6	222	0	firstTileUTR	TRUE
firstTileUTR_00863	YCR088W_5UTR_0	YCR088W_5UTR	chrIII	265022	+	GGCGCGCCGTTTGTTTATAGATTGAACTATCCAATATGGTATACTCCTATTATATCCTTTTTTTCTACTTTAATCGAGGTTTTCCGCATTGTGAAAAAACAAGTGGAAATAAGAGACACAAGGCCACGTGACGCACATTTATACAGAAATAC	1	chrIII_264887_T_C	10	1	0	firstTileUTR	FALSE
firstTileUTR_00864	YCR088W_5UTR_0	YCR088W_5UTR	chrIII	265022	+	GGCGCGCCGTTTGTTTATAGATTGAACTATCCAATATGGTATACTCCTATTATATCCTTTTTTTCTACTTTAATCGAGGTTTTCCGCATTGTGAAAAAACAAGTGGAAATAAGAGACACAAGGCCACGTGACGCACATTTATGCAGAAATAC	1	chrIII_264887_T_C	10	2	0	firstTileUTR	TRUE
firstTileUTR_00865	YCR090C_5UTR_0	YCR090C_5UTR	chrIII	272900	-	GGCGCGCCGTCTTTATTCAAAATTTTTCATTACTTCTTATAAACAGCTTCTTGACGCTTGTAATTTCATAAGTTTTTGATACAAGCAATGGAAACAAAATTAAGAAAATGTAGGCAACGAAGAACTAAATTTGAAAAAAAAAAAAAAAAAAA	1	chrIII_273025_GAAAA_GAAA	20	1	0	firstTileUTR	FALSE
firstTileUTR_00866	YCR090C_5UTR_0	YCR090C_5UTR	chrIII	272900	-	GGCGCGCCGTCTTTATTCAAAATTTTTCATTACTTCTTATAAACAGCTTCTTGACGCTTGTAATTTCATAAGTTTTTGATACAAGCAATGGAAACAAAATTAAGAAAATGTAGGCAACGAAGAACTAAATTTGAAAAAAAAAAAAAAAAAA	1	chrIII_273025_GAAAA_GAAA	20	2	0	firstTileUTR	FALSE
firstTileUTR_00867	YCR098C_5UTR_0	YCR098C_5UTR	chrIII	298664	-	GGCGCGCCGGTTGACTAGTCACAAGAAACAGATAATAAATACTGTAACGAACATCTGCTACAACTACATTCATCGGGGTTTATATATTCACGAGTTTCCTACTTCATCCAGACACATTCTGGATGTCTTCCAGCAGATGTCCCTCATCAAAG	1	chrIII_298764_C_T	45	1	0	firstTileUTR	FALSE
firstTileUTR_00868	YCR098C_5UTR_0	YCR098C_5UTR	chrIII	298664	-	GGCGCGCCGGTTGACTAGTCACAAGAAACAGATAATAAATACTGTAACGAACATCTGCTACAACTACATTCATCGGGGTTTATATATTCACGAGTTTCCTACTTCATTCAGACACATTCTGGATGTCTTCCAGCAGATGTCCCTCATCAAAG	1	chrIII_298764_C_T	45	2	0	firstTileUTR	FALSE
firstTileUTR_00869	YDL241W_5UTR_0	YDL241W_5UTR	chrIV	20557	+	GGCGCGCCATATATATATATATATATATATATATATATAGGTACTAATTGGCTTTTCTTATACGCCTCCTATTGATTCACTGCCGAAAGTGCCCTGTTATATACGACAATCATACGCCTGTTTGCAAATAGTCAACATATTCAACTCGGAAG	1	chrIV_20525_CTATATATATATATA_CTATATA	113	1	0	firstTileUTR	TRUE
firstTileUTR_00870	YDL241W_5UTR_0	YDL241W_5UTR	chrIV	20557	+	GGCGCGCCATATATATATATATATATATATAGGTACTAATTGGCTTTTCTTATACGCCTCCTATTGATTCACTGCCGAAAGTGCCCTGTTATATACGACAATCATACGCCTGTTTGCAAATAGTCAACATATTCAACTCGGAAG	1	chrIV_20525_CTATATATATATATA_CTATATA	113	2	0	firstTileUTR	TRUE
firstTileUTR_00871	YDL236W_5UTR_0	YDL236W_5UTR	chrIV	32281	+	GGCGCGCCATTCTTTGTCAGGGCAAGCTATAAGGCTTTTTTTGTGATTTGGCTCGAGCTTGATATTTATGTCTGCTTGTTATAAACCGATTGCGTCAATTACAATTGAAAAATTCACTAAAACGGAAAGAACATTCACCGAAAAAAAGAAAA	1	chrIV_32140_TC_T	4	1	0	firstTileUTR	FALSE
firstTileUTR_00872	YDL236W_5UTR_0	YDL236W_5UTR	chrIV	32281	+	GGCGCGCCATTCTTTGTCAGGGCAAGCTATAAGGCTTTTTTTGTGATTTGGCTCGAGCTTGATATTTATGTCTGCTTGTTATAAACCGATTGCGTCAATTACAATTGAAAAATTCACTAAAACGGAAAGAACATTCACCGAAAAAAAAAAA	1	chrIV_32140_TC_T	4	2	0	firstTileUTR	FALSE
firstTileUTR_00873	YDL235C_5UTR_0	YDL235C_5UTR	chrIV	34032	-	GGCGCGCCGACCAACCCAACCGGTTTAGAAATTAAAAACAATAATGTTCCTAAATATAGGTTCAATTAAATTTGATAAAAATATTAAACTTTTTATGTAATTTTTCTTCAGTTTTTCCGTTTCGGGCGGGTTACGGATGTATTGATGATTAT	2	chrIV_34063_C_T;chrIV_34142_C_G	114;35	11	0	firstTileUTR	TRUE
firstTileUTR_00874	YDL235C_5UTR_0	YDL235C_5UTR	chrIV	34032	-	GGCGCGCCGACCAACCCAACCGGTTTAGAAATTAAAAATAATAATGTTCCTAAATATAGGTTCAATTAAATTTGATAAAAATATTAAACTTTTTATGTAATTTTTCTTCAGTTTTTCCGTTTCGGGCGGGTTACGGATGTATTGATGATTAT	2	chrIV_34063_C_T;chrIV_34142_C_G	114;35	21	0	firstTileUTR	TRUE
firstTileUTR_00875	YDL235C_5UTR_0	YDL235C_5UTR	chrIV	34032	-	GGCGCGCCGACCAACCCAACCGGTTTAGAAATTAAAAACAATAATGTTCCTAAATATAGGTTCAATTAAATTTGATAAAAATATTAAACTTTTTATGTAATTTTTCTTCAGTTTTTCGGTTTCGGGCGGGTTACGGATGTATTGATGATTAT	2	chrIV_34063_C_T;chrIV_34142_C_G	114;35	12	0	firstTileUTR	TRUE
firstTileUTR_00876	YDL235C_5UTR_0	YDL235C_5UTR	chrIV	34032	-	GGCGCGCCGACCAACCCAACCGGTTTAGAAATTAAAAATAATAATGTTCCTAAATATAGGTTCAATTAAATTTGATAAAAATATTAAACTTTTTATGTAATTTTTCTTCAGTTTTTCGGTTTCGGGCGGGTTACGGATGTATTGATGATTAT	2	chrIV_34063_C_T;chrIV_34142_C_G	114;35	22	0	firstTileUTR	TRUE
firstTileUTR_00877	YDL220C_5UTR_0	YDL220C_5UTR	chrIV	65038	-	GGCGCGCCGGTCATTCGTATCCAAAGAGAAACATATATGAATATATTCTTAAATTTCCATTTTGAATTAGCATTTCGCATCTCACTAGGCCTTCGCGTCTCTTATGACGTTGAAAAATTTGGATATCAAAGGTTTAAAAAGTATAATCACGT	1	chrIV_65137_A_G	46	1	0	firstTileUTR	TRUE
firstTileUTR_00878	YDL220C_5UTR_0	YDL220C_5UTR	chrIV	65038	-	GGCGCGCCGGTCATTCGTATCCAAAGAGAAACATATATGAATATATTCTTAAATTTCCATTTTGAATTAGCATTTCGCATCTCACTAGGCCTTCGCGTCTCTTATGGCGTTGAAAAATTTGGATATCAAAGGTTTAAAAAGTATAATCACGT	1	chrIV_65137_A_G	46	2	0	firstTileUTR	TRUE
firstTileUTR_00879	YDL219W_5UTR_0	YDL219W_5UTR	chrIV	65216	+	GGCGCGCCGGATTATTTAATATGTACATGCAGCCTTGATTAACGTGATTATACTTTTTAAACCTTTGATATCCAAATTTTTCAACGTCATAAGAGACGCGAAGGCCTAGTGAGATGCGAAATGCTAATTCAAAATGGAAATTTAAGAATATA	2	chrIV_65137_A_G;chrIV_65186_T_G	66;115	11	0	firstTileUTR	FALSE
firstTileUTR_00880	YDL219W_5UTR_0	YDL219W_5UTR	chrIV	65216	+	GGCGCGCCGGATTATTTAATATGTACATGCAGCCTTGATTAACGTGATTATACTTTTTAAACCTTTGATATCCAAATTTTTCAACGCCATAAGAGACGCGAAGGCCTAGTGAGATGCGAAATGCTAATTCAAAATGGAAATTTAAGAATATA	2	chrIV_65137_A_G;chrIV_65186_T_G	66;115	21	0	firstTileUTR	FALSE
firstTileUTR_00881	YDL219W_5UTR_0	YDL219W_5UTR	chrIV	65216	+	GGCGCGCCGGATTATTTAATATGTACATGCAGCCTTGCTTAACGTGATTATACTTTTTAAACCTTTGATATCCAAATTTTTCAACGTCATAAGAGACGCGAAGGCCTAGTGAGATGCGAAATGCTAATTCAAAATGGAAATTTAAGAATATA	2	chrIV_65137_A_G;chrIV_65186_T_G	66;115	12	0	firstTileUTR	FALSE
firstTileUTR_00882	YDL219W_5UTR_0	YDL219W_5UTR	chrIV	65216	+	GGCGCGCCGGATTATTTAATATGTACATGCAGCCTTGCTTAACGTGATTATACTTTTTAAACCTTTGATATCCAAATTTTTCAACGCCATAAGAGACGCGAAGGCCTAGTGAGATGCGAAATGCTAATTCAAAATGGAAATTTAAGAATATA	2	chrIV_65137_A_G;chrIV_65186_T_G	66;115	22	0	firstTileUTR	FALSE
firstTileUTR_00883	YDL218W_5UTR_0	YDL218W_5UTR	chrIV	66148	+	GGCGCGCCGGAAATACACTGTAAACATGCTTTTAGCCCTCTGGATTAGTAAGACTGGCAGGGCATCGCTTCGCCGTCCCTTTTTTCACTTTTACATTTTTTTTTTTTCATTTTCGCCCTTAAAGTTTTTTAAAGTTGATTTACTTACTTTTA	1	chrIV_66048_GAA_G	45	1	0	firstTileUTR	TRUE
firstTileUTR_00884	YDL218W_5UTR_0	YDL218W_5UTR	chrIV	66148	+	GGCGCGCCGGAAATACACTGTAAACATGCTTTTAGCCCTCTGGATTAGTAAGACTGGCAGGGCATCGCTTCGCCGTCCCTTTTTTCACTTTTACATTTTTTTTTTCATTTTCGCCCTTAAAGTTTTTTAAAGTTGATTTACTTACTTTTA	1	chrIV_66048_GAA_G	45	2	0	firstTileUTR	TRUE
firstTileUTR_00885	YDL217C_5UTR_0	YDL217C_5UTR	chrIV	68766	-	GGCGCGCCGTCTGTTTTATTAGAGAATTAAGTTGACTGATGCATCGTCTTTCTCTTCAGTTGTAAGCTCGATGCCATTTTATCAGTAAGACCAAAAACCAACACATAACGGCGTACGAAAATATCAAATTGTCACCCGGTATAGATATACTT	1	chrIV_68860_C_A	51	1	0	firstTileUTR	FALSE
firstTileUTR_00886	YDL217C_5UTR_0	YDL217C_5UTR	chrIV	68766	-	GGCGCGCCGTCTGTTTTATTAGAGAATTAAGTTGACTGATGCATCGTCTTTCTCTTCAGTTGTAAGCTCGATGCCATTTTATCAGTAAGACCAAAAACCAAAACATAACGGCGTACGAAAATATCAAATTGTCACCCGGTATAGATATACTT	1	chrIV_68860_C_A	51	2	0	firstTileUTR	FALSE
firstTileUTR_00887	YDL216C_5UTR_0	YDL216C_5UTR	chrIV	70338	-	GGCGCGCCATTGATTTTCGATCGTTGTTATTCATTTTTAGTTTATTTGAAAAACCCTTTAATAAGAGCGCTTCCTGCGTAGCGCGCCTTTCCTAAAGTTTCAGCTGAAGCATGGCTCCCTGAGGAGAACTGCCTAGTATAATGGATAACTCG	2	chrIV_70378_G_GA;chrIV_70457_A_G	105;26	11	0	firstTileUTR	TRUE
firstTileUTR_00888	YDL216C_5UTR_0	YDL216C_5UTR	chrIV	70338	-	GGCGCGCCATTGATTTTCGATCGTTGTTATTCATTTTTAGTTTATTTGAAAAAACCCTTTAATAAGAGCGCTTCCTGCGTAGCGCGCCTTTCCTAAAGTTTCAGCTGAAGCATGGCTCCCTGAGGAGAACTGCCTAGTATAATGGATAACTCG	2	chrIV_70378_G_GA;chrIV_70457_A_G	105;26	21	0	firstTileUTR	TRUE
firstTileUTR_00889	YDL216C_5UTR_0	YDL216C_5UTR	chrIV	70338	-	GGCGCGCCATTGATTTTCGATCGTTGTTATTCATTTTTAGTTTATTTGAAAAACCCTTTAATAAGAGCGCTTCCTGCGTAGCGCGCCTTTCCTAAAGTTTCAGCTGAAGCATGGCTCCCTGAGGAGGACTGCCTAGTATAATGGATAACTCG	2	chrIV_70378_G_GA;chrIV_70457_A_G	105;26	12	0	firstTileUTR	TRUE
firstTileUTR_00890	YDL216C_5UTR_0	YDL216C_5UTR	chrIV	70338	-	GGCGCGCCATTGATTTTCGATCGTTGTTATTCATTTTTAGTTTATTTGAAAAAACCCTTTAATAAGAGCGCTTCCTGCGTAGCGCGCCTTTCCTAAAGTTTCAGCTGAAGCATGGCTCCCTGAGGAGGACTGCCTAGTATAATGGATAACTCG	2	chrIV_70378_G_GA;chrIV_70457_A_G	105;26	22	0	firstTileUTR	TRUE
firstTileUTR_00891	YDL214C_5UTR_0	YDL214C_5UTR	chrIV	76712	-	GGCGCGCCCAATTTCCAGATTTTCGTATTTATTTTTTTTTTTTGCACCTTTCCTTATTGTGTGACCACAGCCGAAGGTGACGAAGGGATGGAGACTAGCCAAAGAGAGCCGGCTGTTAGACAAAAAAAAAAGCGGAGATTGTTTAACGGATA	3	chrIV_76735_ATT_AT;chrIV_76795_G_C;chrIV_76825_CAA_CA	122;62;32	111	0	firstTileUTR	TRUE
firstTileUTR_00892	YDL214C_5UTR_0	YDL214C_5UTR	chrIV	76712	-	GGCGCGCCCAATTTCCAGATTTTCGTATTTATTTTTTTTTTTGCACCTTTCCTTATTGTGTGACCACAGCCGAAGGTGACGAAGGGATGGAGACTAGCCAAAGAGAGCCGGCTGTTAGACAAAAAAAAAAGCGGAGATTGTTTAACGGATA	3	chrIV_76735_ATT_AT;chrIV_76795_G_C;chrIV_76825_CAA_CA	122;62;32	211	0	firstTileUTR	FALSE
firstTileUTR_00893	YDL214C_5UTR_0	YDL214C_5UTR	chrIV	76712	-	GGCGCGCCCAATTTCCAGATTTTCGTATTTATTTTTTTTTTTTGCACCTTTCCTTATTGTGTGACCACAGCCGAAGGTGACGAAGGGATGCAGACTAGCCAAAGAGAGCCGGCTGTTAGACAAAAAAAAAAGCGGAGATTGTTTAACGGATA	3	chrIV_76735_ATT_AT;chrIV_76795_G_C;chrIV_76825_CAA_CA	122;62;32	121	0	firstTileUTR	TRUE
firstTileUTR_00894	YDL214C_5UTR_0	YDL214C_5UTR	chrIV	76712	-	GGCGCGCCCAATTTCCAGATTTTCGTATTTATTTTTTTTTTTTGCACCTTTCCTTATTGTGTGACCACAGCCGAAGGTGACGAAGGGATGGAGACTAGCCAAAGAGAGCCGGCTGTTAGACAAAAAAAAAGCGGAGATTGTTTAACGGATA	3	chrIV_76735_ATT_AT;chrIV_76795_G_C;chrIV_76825_CAA_CA	122;62;32	112	0	firstTileUTR	TRUE
firstTileUTR_00895	YDL214C_5UTR_0	YDL214C_5UTR	chrIV	76712	-	GGCGCGCCCAATTTCCAGATTTTCGTATTTATTTTTTTTTTTGCACCTTTCCTTATTGTGTGACCACAGCCGAAGGTGACGAAGGGATGCAGACTAGCCAAAGAGAGCCGGCTGTTAGACAAAAAAAAAGCGGAGATTGTTTAACGGATA	3	chrIV_76735_ATT_AT;chrIV_76795_G_C;chrIV_76825_CAA_CA	122;62;32	222	0	firstTileUTR	TRUE
firstTileUTR_00896	YDL213C_5UTR_0	YDL213C_5UTR	chrIV	77975	-	GGCGCGCCAGACGTCTTCAATCTCTATCCTGTCCTCTACATTAGATTACTTTCTCATTTTCTCAGAAAACCTTTTAAGCTCATCGATTAAGAAGAAAAAAATCTTAGAAAATTTTCAGGAATGCCGGGTAAACGTATGGGGAAAGGACTTGG	1	chrIV_77997_T_C	123	1	0	firstTileUTR	FALSE
firstTileUTR_00897	YDL213C_5UTR_0	YDL213C_5UTR	chrIV	77975	-	GGCGCGCCAGACGTCTTCAATCTCTATCCCGTCCTCTACATTAGATTACTTTCTCATTTTCTCAGAAAACCTTTTAAGCTCATCGATTAAGAAGAAAAAAATCTTAGAAAATTTTCAGGAATGCCGGGTAAACGTATGGGGAAAGGACTTGG	1	chrIV_77997_T_C	123	2	0	firstTileUTR	FALSE
firstTileUTR_00898	YDL212W_5UTR_0	YDL212W_5UTR	chrIV	78404	+	GGCGCGCCGGGATTTTATGCTCTGTAGTCCAATGAATTTACGGCTGTCTTCCAAAATACTTAAATCTGTCCTTTCATCAACTTTTTATATTTTTCAGAGTTTTTACACAACCCGAAAAAATTGTTATCGTGTATTAATTTTAGTACATTATA	1	chrIV_78264_A_C	5	1	0	firstTileUTR	TRUE
firstTileUTR_00899	YDL212W_5UTR_0	YDL212W_5UTR	chrIV	78404	+	GGCGCGCCGGGATTTTATGCTCTGTAGTCCAATGAATTTACGGCTGTCTTCCAAAATACTTAAATCTGTCCTTTCATCAACTTTTTATATTTTTCAGAGTTTTTACACAACCCGAAAAAATTGTTATCGTGTATTAATTTTAGTACAGTATA	1	chrIV_78264_A_C	5	2	0	firstTileUTR	TRUE
firstTileUTR_00900	YDL211C_5UTR_0	YDL211C_5UTR	chrIV	80481	-	GGCGCGCCAACGTTCTATGAATTACTTTATTATCTCGAGCAGAACCATCTGAATTTTGTTTACGTTTAATCTATGAGAAATTTCTCTGACGCGAAATCTTTCACGTATTTTTAGAGCGCCCGCCCAAGGTAACATACAATACGGTTGATATC	3	chrIV_80483_A_G;chrIV_80506_T_C;chrIV_80612_A_G	143;120;14	111	0	firstTileUTR	TRUE
firstTileUTR_00901	YDL211C_5UTR_0	YDL211C_5UTR	chrIV	80481	-	GGCGCGCCAGCGTTCTATGAATTACTTTATTATCTCGAGCAGAACCATCTGAATTTTGTTTACGTTTAATCTATGAGAAATTTCTCTGACGCGAAATCTTTCACGTATTTTTAGAGCGCCCGCCCAAGGTAACATACAATACGGTTGATATC	3	chrIV_80483_A_G;chrIV_80506_T_C;chrIV_80612_A_G	143;120;14	211	0	firstTileUTR	TRUE
firstTileUTR_00902	YDL211C_5UTR_0	YDL211C_5UTR	chrIV	80481	-	GGCGCGCCAACGTTCTATGAATTACTTTATTACCTCGAGCAGAACCATCTGAATTTTGTTTACGTTTAATCTATGAGAAATTTCTCTGACGCGAAATCTTTCACGTATTTTTAGAGCGCCCGCCCAAGGTAACATACAATACGGTTGATATC	3	chrIV_80483_A_G;chrIV_80506_T_C;chrIV_80612_A_G	143;120;14	121	0	firstTileUTR	TRUE
firstTileUTR_00903	YDL211C_5UTR_0	YDL211C_5UTR	chrIV	80481	-	GGCGCGCCAACGTTCTATGAATTACTTTATTATCTCGAGCAGAACCATCTGAATTTTGTTTACGTTTAATCTATGAGAAATTTCTCTGACGCGAAATCTTTCACGTATTTTTAGAGCGCCCGCCCAAGGTAACATACAGTACGGTTGATATC	3	chrIV_80483_A_G;chrIV_80506_T_C;chrIV_80612_A_G	143;120;14	112	0	firstTileUTR	TRUE
firstTileUTR_00904	YDL211C_5UTR_0	YDL211C_5UTR	chrIV	80481	-	GGCGCGCCAGCGTTCTATGAATTACTTTATTACCTCGAGCAGAACCATCTGAATTTTGTTTACGTTTAATCTATGAGAAATTTCTCTGACGCGAAATCTTTCACGTATTTTTAGAGCGCCCGCCCAAGGTAACATACAGTACGGTTGATATC	3	chrIV_80483_A_G;chrIV_80506_T_C;chrIV_80612_A_G	143;120;14	222	0	firstTileUTR	TRUE
firstTileUTR_00905	YDL209C_5UTR_0	YDL209C_5UTR	chrIV	87248	-	GGCGCGCCACTGTCTTACTAACGTCGTTACTACCTTAAGGCCCATCGCCAGTAGTCTTTATTATGATCCAGCCTTCAATACATAATGGAAAATTTCATCATTACCCGCATATGTACGTATGTAACGATGGAATGCTCAAAAACTGAAAAAAA	1	chrIV_87312_C_T	81	1	0	firstTileUTR	FALSE
firstTileUTR_00906	YDL209C_5UTR_0	YDL209C_5UTR	chrIV	87248	-	GGCGCGCCACTGTCTTACTAACGTCGTTACTACCTTAAGGCCCATCGCCAGTAGTCTTTATTATGATCCAGTCTTCAATACATAATGGAAAATTTCATCATTACCCGCATATGTACGTATGTAACGATGGAATGCTCAAAAACTGAAAAAAA	1	chrIV_87312_C_T	81	2	0	firstTileUTR	FALSE
firstTileUTR_00907	YDL207W_5UTR_0	YDL207W_5UTR	chrIV	88210	+	GGCGCGCCGATTCTCTTGTTATCAATTATATACCTATTTCTTTGATGATATTTTCATTAAACATACAAAAAGTGGAACAGTAGAACGAAGCCCGGTTACCCGAAAAGTCACAAACATTTGATGTTATTAGTAGTATTATATAATATACAGAA	1	chrIV_88140_G_GTT	75	1	0	firstTileUTR	FALSE
firstTileUTR_00908	YDL207W_5UTR_0	YDL207W_5UTR	chrIV	88210	+	GGCGCGCCGATTCTCTTGTTATCAATTATATACCTATTTCTTTGATGATATTTTCATTAAACATACAAAAAGTGGAAAACAGTAGAACGAAGCCCGGTTACCCGAAAAGTCACAAACATTTGATGTTATTAGTAGTATTATATAATATACAGAA	1	chrIV_88140_G_GTT	75	2	0	firstTileUTR	FALSE
firstTileUTR_00909	YDL205C_5UTR_0	YDL205C_5UTR	chrIV	93929	-	GGCGCGCCAATACAGATAGTTAGTAGCCTCGTTTATATAAAGCGTTCCTTTACTTTTTCATTTTCTTTCTTTTTTTATGTTTGATTTTTTTACTTTTTCACTTTAAAAAATTGCTGAAATTTTCGTAGCCAAAAAAAAGACCTTCATTGCTT	2	chrIV_93990_C_CT;chrIV_94008_T_A	84;66	11	0	firstTileUTR	TRUE
firstTileUTR_00910	YDL205C_5UTR_0	YDL205C_5UTR	chrIV	93929	-	GGCGCGCCAATACAGATAGTTAGTAGCCTCGTTTATATAAAGCGTTCCTTTACTTTTTCATTTTCTTTCTTTTTTTTATGTTTGATTTTTTTACTTTTTCACTTTAAAAAATTGCTGAAATTTTCGTAGCCAAAAAAAAGACCTTCATTGCTT	2	chrIV_93990_C_CT;chrIV_94008_T_A	84;66	21	0	firstTileUTR	TRUE
firstTileUTR_00911	YDL205C_5UTR_0	YDL205C_5UTR	chrIV	93929	-	GGCGCGCCAATACAGATAGTTAGTAGCCTCGTTTATATAAAGCGTTCCTTTACTTTTTCATTTTCTTTCTTTTTTTATGTTTGATTATTTTACTTTTTCACTTTAAAAAATTGCTGAAATTTTCGTAGCCAAAAAAAAGACCTTCATTGCTT	2	chrIV_93990_C_CT;chrIV_94008_T_A	84;66	12	0	firstTileUTR	TRUE
firstTileUTR_00912	YDL205C_5UTR_0	YDL205C_5UTR	chrIV	93929	-	GGCGCGCCAATACAGATAGTTAGTAGCCTCGTTTATATAAAGCGTTCCTTTACTTTTTCATTTTCTTTCTTTTTTTTATGTTTGATTATTTTACTTTTTCACTTTAAAAAATTGCTGAAATTTTCGTAGCCAAAAAAAAGACCTTCATTGCTT	2	chrIV_93990_C_CT;chrIV_94008_T_A	84;66	22	0	firstTileUTR	TRUE
firstTileUTR_00913	YDL204W_5UTR_0	YDL204W_5UTR	chrIV	94107	+	GGCGCGCCGGGGAGCGTCTGACCAATAAGAAACCGATGAGTAAGCAATGAAGGTCTTTTTTTTGGCTACGAAAATTTCAGCAATTTTTTAAAGTGAAAAAGTAAAAAAATCAAACATAAAAAAAGAAAGAAAATGAAAAAGTAAAGGAACGC	2	chrIV_93990_C_CT;chrIV_94008_T_A	28;46	11	0	firstTileUTR	FALSE
firstTileUTR_00914	YDL204W_5UTR_0	YDL204W_5UTR	chrIV	94107	+	GGCGCGCCGGGGAGCGTCTGACCAATAAGAAACCGATGAGTAAGCAATGAAGGTCTTTTTTTTGGCTACGAAAATTTCAGCAATTTTTTAAAGTGAAAAAGTAAAAAAATCAAACATAAAAAAAAGAAAGAAAATGAAAAAGTAAAGGAACGC	2	chrIV_93990_C_CT;chrIV_94008_T_A	28;46	21	0	firstTileUTR	FALSE
firstTileUTR_00915	YDL204W_5UTR_0	YDL204W_5UTR	chrIV	94107	+	GGCGCGCCGGGGAGCGTCTGACCAATAAGAAACCGATGAGTAAGCAATGAAGGTCTTTTTTTTGGCTACGAAAATTTCAGCAATTTTTTAAAGTGAAAAAGTAAAATAATCAAACATAAAAAAAGAAAGAAAATGAAAAAGTAAAGGAACGC	2	chrIV_93990_C_CT;chrIV_94008_T_A	28;46	12	0	firstTileUTR	FALSE
firstTileUTR_00916	YDL204W_5UTR_0	YDL204W_5UTR	chrIV	94107	+	GGCGCGCCGGGGAGCGTCTGACCAATAAGAAACCGATGAGTAAGCAATGAAGGTCTTTTTTTTGGCTACGAAAATTTCAGCAATTTTTTAAAGTGAAAAAGTAAAATAATCAAACATAAAAAAAAGAAAGAAAATGAAAAAGTAAAGGAACGC	2	chrIV_93990_C_CT;chrIV_94008_T_A	28;46	22	0	firstTileUTR	FALSE
firstTileUTR_00917	YDL202W_5UTR_0	YDL202W_5UTR	chrIV	98422	+	GGCGCGCCGTTTTCCTTACTCTTCAATTGTACTAACCTTCTTTCTTTTCTCAGTTTACTGCTATAACTCTACGTTTTTTTCTGTATGAATCTCTACTAAGCCCTAGGGTTATTAGTGTATAAACGTTAGGTTACACTATGAAAAAGACTTGT	3	chrIV_98297_T_A;chrIV_98322_C_A;chrIV_98345_T_C	20;45;68	111	0	firstTileUTR	TRUE
firstTileUTR_00918	YDL202W_5UTR_0	YDL202W_5UTR	chrIV	98422	+	GGCGCGCCGTTTTCCTTACTCTTCAATTGTACTAACCTTCTTTCTTTTCTCAGTTTACTGCTATAACTCTACGTTTTTTTCTGTATGAATCTCTACTAAGCCCTAGGGTTATTAGTGTATAAACGTTAGGTTTCACTATGAAAAAGACTTGT	3	chrIV_98297_T_A;chrIV_98322_C_A;chrIV_98345_T_C	20;45;68	211	0	firstTileUTR	TRUE
firstTileUTR_00919	YDL202W_5UTR_0	YDL202W_5UTR	chrIV	98422	+	GGCGCGCCGTTTTCCTTACTCTTCAATTGTACTAACCTTCTTTCTTTTCTCAGTTTACTGCTATAACTCTACGTTTTTTTCTGTATGAATCTCTACTAAGCCCTAGGTTTATTAGTGTATAAACGTTAGGTTACACTATGAAAAAGACTTGT	3	chrIV_98297_T_A;chrIV_98322_C_A;chrIV_98345_T_C	20;45;68	121	0	firstTileUTR	TRUE
firstTileUTR_00920	YDL202W_5UTR_0	YDL202W_5UTR	chrIV	98422	+	GGCGCGCCGTTTTCCTTACTCTTCAATTGTACTAACCTTCTTTCTTTTCTCAGTTTACTGCTATAACTCTACGTTTTTTTCTGTGTGAATCTCTACTAAGCCCTAGGGTTATTAGTGTATAAACGTTAGGTTACACTATGAAAAAGACTTGT	3	chrIV_98297_T_A;chrIV_98322_C_A;chrIV_98345_T_C	20;45;68	112	0	firstTileUTR	TRUE
firstTileUTR_00921	YDL202W_5UTR_0	YDL202W_5UTR	chrIV	98422	+	GGCGCGCCGTTTTCCTTACTCTTCAATTGTACTAACCTTCTTTCTTTTCTCAGTTTACTGCTATAACTCTACGTTTTTTTCTGTGTGAATCTCTACTAAGCCCTAGGTTTATTAGTGTATAAACGTTAGGTTTCACTATGAAAAAGACTTGT	3	chrIV_98297_T_A;chrIV_98322_C_A;chrIV_98345_T_C	20;45;68	222	0	firstTileUTR	TRUE
firstTileUTR_00922	YDL201W_5UTR_0	YDL201W_5UTR	chrIV	99544	+	GGCGCGCCGAAAATTTTATCCTATGGGAACTGCTGAATCTATACTAATCCAGCTTTTGTGGCGCTTTAATAAAGTGAAATGTCAGAAATATCCTGAAATTTTTTGCTGAAGTCATCACCAAAATTTTTCATTTTTTTTTTTTTTCAACGGTC	1	chrIV_99407_GAA_GA	8	1	0	firstTileUTR	TRUE
firstTileUTR_00923	YDL201W_5UTR_0	YDL201W_5UTR	chrIV	99544	+	GGCGCGCCGAAAATTTTATCCTATGGGAACTGCTGAATCTATACTAATCCAGCTTTTGTGGCGCTTTAATAAAGTGAAATGTCAGAAATATCCTGAAATTTTTTGCTGAAGTCATCACCAAAATTTTTCATTTTTTTTTTTTTCAACGGTC	1	chrIV_99407_GAA_GA	8	2	0	firstTileUTR	TRUE
firstTileUTR_00924	YDL200C_5UTR_0	YDL200C_5UTR	chrIV	101071	-	GGCGCGCCGGTCCATTTAGATCAAAAATGCGACCGTTTTCAATTTTTTTTTTGTGCATATGCTATATCATTACTTGATTAATCTTCCTTGTTTCCACCGCATTTTAAATGCCCTGCCAGGCCAATAGCGCCGTGCCTTTTTTCTAATGACTA	1	chrIV_101105_AT_ATTT	111	1	0	firstTileUTR	TRUE
firstTileUTR_00925	YDL200C_5UTR_0	YDL200C_5UTR	chrIV	101071	-	GGCGCGCCGGTCCATTTAGATCAAAAATGCGACCGTTTTCAATTTTTTTTTTTTGTGCATATGCTATATCATTACTTGATTAATCTTCCTTGTTTCCACCGCATTTTAAATGCCCTGCCAGGCCAATAGCGCCGTGCCTTTTTTCTAATGACTA	1	chrIV_101105_AT_ATTT	111	2	0	firstTileUTR	TRUE
firstTileUTR_00926	YDL199C_5UTR_0	YDL199C_5UTR	chrIV	103403	-	GGCGCGCCAGCGCTCTTCTTTATGTTCATTCTTTTTGTCCTGAAGTGGCCCAGAAGCCCTTCAAAGCAATCCTTTATTTTTTTAGAACTACGCGGCTGACGTCCTTACCTCGGTACGGTGATACAGCTATTACATTGGAAAAAGTAGTTAGT	7	chrIV_103421_T_G;chrIV_103440_G_C;chrIV_103444_C_T;chrIV_103456_T_C;chrIV_103509_T_C;chrIV_103532_G_C;chrIV_103533_GA_G	127;108;104;92;39;16;15	1111111	0	firstTileUTR	TRUE
firstTileUTR_00927	YDL199C_5UTR_0	YDL199C_5UTR	chrIV	103403	-	GGCGCGCCAGCGCTCTTCTTTATGTGCATTCTTTTTGTCCTGAAGTGGCCCAGAAGCCCTTCAAAGCAATCCTTTATTTTTTTAGAACTACGCGGCTGACGTCCTTACCTCGGTACGGTGATACAGCTATTACATTGGAAAAAGTAGTTAGT	7	chrIV_103421_T_G;chrIV_103440_G_C;chrIV_103444_C_T;chrIV_103456_T_C;chrIV_103509_T_C;chrIV_103532_G_C;chrIV_103533_GA_G	127;108;104;92;39;16;15	2111111	0	firstTileUTR	TRUE
firstTileUTR_00928	YDL199C_5UTR_0	YDL199C_5UTR	chrIV	103403	-	GGCGCGCCAGCGCTCTTCTTTATGTTCATTCTTTTTGTCCTGAACTGGCCCAGAAGCCCTTCAAAGCAATCCTTTATTTTTTTAGAACTACGCGGCTGACGTCCTTACCTCGGTACGGTGATACAGCTATTACATTGGAAAAAGTAGTTAGT	7	chrIV_103421_T_G;chrIV_103440_G_C;chrIV_103444_C_T;chrIV_103456_T_C;chrIV_103509_T_C;chrIV_103532_G_C;chrIV_103533_GA_G	127;108;104;92;39;16;15	1211111	0	firstTileUTR	TRUE
firstTileUTR_00929	YDL199C_5UTR_0	YDL199C_5UTR	chrIV	103403	-	GGCGCGCCAGCGCTCTTCTTTATGTTCATTCTTTTTGTCCTGAAGTGGTCCAGAAGCCCTTCAAAGCAATCCTTTATTTTTTTAGAACTACGCGGCTGACGTCCTTACCTCGGTACGGTGATACAGCTATTACATTGGAAAAAGTAGTTAGT	7	chrIV_103421_T_G;chrIV_103440_G_C;chrIV_103444_C_T;chrIV_103456_T_C;chrIV_103509_T_C;chrIV_103532_G_C;chrIV_103533_GA_G	127;108;104;92;39;16;15	1121111	0	firstTileUTR	TRUE
firstTileUTR_00930	YDL199C_5UTR_0	YDL199C_5UTR	chrIV	103403	-	GGCGCGCCAGCGCTCTTCTTTATGTTCATTCTTTTTGTCCTGAAGTGGCCCAGAAGCCCTCCAAAGCAATCCTTTATTTTTTTAGAACTACGCGGCTGACGTCCTTACCTCGGTACGGTGATACAGCTATTACATTGGAAAAAGTAGTTAGT	7	chrIV_103421_T_G;chrIV_103440_G_C;chrIV_103444_C_T;chrIV_103456_T_C;chrIV_103509_T_C;chrIV_103532_G_C;chrIV_103533_GA_G	127;108;104;92;39;16;15	1112111	0	firstTileUTR	TRUE
firstTileUTR_00931	YDL199C_5UTR_0	YDL199C_5UTR	chrIV	103403	-	GGCGCGCCAGCGCTCTTCTTTATGTTCATTCTTTTTGTCCTGAAGTGGCCCAGAAGCCCTTCAAAGCAATCCTTTATTTTTTTAGAACTACGCGGCTGACGTCCTTACCTCGGCACGGTGATACAGCTATTACATTGGAAAAAGTAGTTAGT	7	chrIV_103421_T_G;chrIV_103440_G_C;chrIV_103444_C_T;chrIV_103456_T_C;chrIV_103509_T_C;chrIV_103532_G_C;chrIV_103533_GA_G	127;108;104;92;39;16;15	1111211	0	firstTileUTR	TRUE
firstTileUTR_00932	YDL199C_5UTR_0	YDL199C_5UTR	chrIV	103403	-	GGCGCGCCAGCGCTCTTCTTTATGTTCATTCTTTTTGTCCTGAAGTGGCCCAGAAGCCCTTCAAAGCAATCCTTTATTTTTTTAGAACTACGCGGCTGACGTCCTTACCTCGGTACGGTGATACAGCTATTACATTCGAAAAAGTAGTTAGT	7	chrIV_103421_T_G;chrIV_103440_G_C;chrIV_103444_C_T;chrIV_103456_T_C;chrIV_103509_T_C;chrIV_103532_G_C;chrIV_103533_GA_G	127;108;104;92;39;16;15	1111121	0	firstTileUTR	TRUE
firstTileUTR_00933	YDL199C_5UTR_0	YDL199C_5UTR	chrIV	103403	-	GGCGCGCCAGCGCTCTTCTTTATGTTCATTCTTTTTGTCCTGAAGTGGCCCAGAAGCCCTTCAAAGCAATCCTTTATTTTTTTAGAACTACGCGGCTGACGTCCTTACCTCGGTACGGTGATACAGCTATTACATTGGAAAAGTAGTTAGT	7	chrIV_103421_T_G;chrIV_103440_G_C;chrIV_103444_C_T;chrIV_103456_T_C;chrIV_103509_T_C;chrIV_103532_G_C;chrIV_103533_GA_G	127;108;104;92;39;16;15	1111112	0	firstTileUTR	TRUE
firstTileUTR_00934	YDL199C_5UTR_0	YDL199C_5UTR	chrIV	103403	-	GGCGCGCCAGCGCTCTTCTTTATGTGCATTCTTTTTGTCCTGAACTGGTCCAGAAGCCCTCCAAAGCAATCCTTTATTTTTTTAGAACTACGCGGCTGACGTCCTTACCTCGGCACGGTGATACAGCTATTACATTCGAAAAGTAGTTAGT	7	chrIV_103421_T_G;chrIV_103440_G_C;chrIV_103444_C_T;chrIV_103456_T_C;chrIV_103509_T_C;chrIV_103532_G_C;chrIV_103533_GA_G	127;108;104;92;39;16;15	2222222	0	firstTileUTR	TRUE
firstTileUTR_00935	YDL198C_5UTR_0	YDL198C_5UTR	chrIV	104579	-	GGCGCGCCGCTTTGTTTGATATATGTCTAAAGGCTAAATATTAACCATCAAAAGAGATACACGATTTATATAGTCACCTCTATATATCTATGTCGTCGCTTTGTAGAAAATGTGACAGCAAATGCACAGTGACTCACGAGTTTTTGTTTTCT	1	chrIV_104599_T_A	125	1	0	firstTileUTR	TRUE
firstTileUTR_00936	YDL198C_5UTR_0	YDL198C_5UTR	chrIV	104579	-	GGCGCGCCGCTTTGTTTGATATATGTCAAAAGGCTAAATATTAACCATCAAAAGAGATACACGATTTATATAGTCACCTCTATATATCTATGTCGTCGCTTTGTAGAAAATGTGACAGCAAATGCACAGTGACTCACGAGTTTTTGTTTTCT	1	chrIV_104599_T_A	125	2	0	firstTileUTR	TRUE
firstTileUTR_00937	YDL192W_5UTR_0	YDL192W_5UTR	chrIV	116278	+	GGCGCGCCAATGCCAGAGGTTCCAAAAAGTTTCAAAACAAAATGAACTTTCTATCTAGTAAGACTTATAAAAACCACCTCGATAAACAAGTGGATCGAGAACGTGTCAAAGATTCCGTTTCTCTCTCTGTTTTTCCATTTTTCGATTTTCAT	2	chrIV_116227_A_G;chrIV_116257_C_T	94;124	11	0	firstTileUTR	FALSE
firstTileUTR_00938	YDL192W_5UTR_0	YDL192W_5UTR	chrIV	116278	+	GGCGCGCCAATGCCAGAGGTTCCAAAAAGTTTCAAAACAAAATGAACTTTCTATCTAGCAAGACTTATAAAAACCACCTCGATAAACAAGTGGATCGAGAACGTGTCAAAGATTCCGTTTCTCTCTCTGTTTTTCCATTTTTCGATTTTCAT	2	chrIV_116227_A_G;chrIV_116257_C_T	94;124	21	0	firstTileUTR	FALSE
firstTileUTR_00939	YDL192W_5UTR_0	YDL192W_5UTR	chrIV	116278	+	GGCGCGCCAATGCCAGAGGTTCCAAAAAATTTCAAAACAAAATGAACTTTCTATCTAGTAAGACTTATAAAAACCACCTCGATAAACAAGTGGATCGAGAACGTGTCAAAGATTCCGTTTCTCTCTCTGTTTTTCCATTTTTCGATTTTCAT	2	chrIV_116227_A_G;chrIV_116257_C_T	94;124	12	0	firstTileUTR	FALSE
firstTileUTR_00940	YDL192W_5UTR_0	YDL192W_5UTR	chrIV	116278	+	GGCGCGCCAATGCCAGAGGTTCCAAAAAATTTCAAAACAAAATGAACTTTCTATCTAGCAAGACTTATAAAAACCACCTCGATAAACAAGTGGATCGAGAACGTGTCAAAGATTCCGTTTCTCTCTCTGTTTTTCCATTTTTCGATTTTCAT	2	chrIV_116227_A_G;chrIV_116257_C_T	94;124	22	0	firstTileUTR	FALSE
firstTileUTR_00941	YDL191W_5UTR_0	YDL191W_5UTR	chrIV	117642	+	GGCGCGCCACCTATTCTACGGTCAATAATAGTGCTAATCGACAGCGTATGCTTAACATTATATTACATATATGAATTACTCAGGTGTGAATTTTGCAAAATTGATGCTGGAATCCTGCCCAAACCCGCCCGTTAGTGCATGGAGTGCCAGGT	2	chrIV_117532_G_A;chrIV_117622_T_C	35;125	11	0	firstTileUTR	TRUE
firstTileUTR_00942	YDL191W_5UTR_0	YDL191W_5UTR	chrIV	117642	+	GGCGCGCCACCTATTCTACGGTCAATAATAGTGCTAATCGACAGCGTATGCTTAACATTATATTACATATATGAATTACTCAGGTGTGAATTTTGCAAAATTGATGCTGGAATCCTGTCCAAACCCGCCCGTTAGTGCATGGAGTGCCAGGT	2	chrIV_117532_G_A;chrIV_117622_T_C	35;125	21	0	firstTileUTR	TRUE
firstTileUTR_00943	YDL191W_5UTR_0	YDL191W_5UTR	chrIV	117642	+	GGCGCGCCACCTATTCTACGGTCAATAGTAGTGCTAATCGACAGCGTATGCTTAACATTATATTACATATATGAATTACTCAGGTGTGAATTTTGCAAAATTGATGCTGGAATCCTGCCCAAACCCGCCCGTTAGTGCATGGAGTGCCAGGT	2	chrIV_117532_G_A;chrIV_117622_T_C	35;125	12	0	firstTileUTR	TRUE
firstTileUTR_00944	YDL191W_5UTR_0	YDL191W_5UTR	chrIV	117642	+	GGCGCGCCACCTATTCTACGGTCAATAGTAGTGCTAATCGACAGCGTATGCTTAACATTATATTACATATATGAATTACTCAGGTGTGAATTTTGCAAAATTGATGCTGGAATCCTGTCCAAACCCGCCCGTTAGTGCATGGAGTGCCAGGT	2	chrIV_117532_G_A;chrIV_117622_T_C	35;125	22	0	firstTileUTR	TRUE
firstTileUTR_00945	YDL187C_5UTR_0	YDL187C_5UTR	chrIV	126465	-	GGCGCGCCATAGTCCTATCTATTGTTCTTTTTATTCCTAGCATAACCTTATTGTATTGTTCTTTTTCTTTTTCCTTTTTCTTTTTTTTTTTTTTTTTTTTTTTTTTTTCACATCTTTTTCCACGGCCGCTCAAAGGGGTCTCACACTGGATT	1	chrIV_126538_T_A	72	1	0	firstTileUTR	TRUE
firstTileUTR_00946	YDL187C_5UTR_0	YDL187C_5UTR	chrIV	126465	-	GGCGCGCCATAGTCCTATCTATTGTTCTTTTTATTCCTAGCATAACCTTATTGTATTGTTCTTTTTCTTTTTCCTTTTTCATTTTTTTTTTTTTTTTTTTTTTTTTTTCACATCTTTTTCCACGGCCGCTCAAAGGGGTCTCACACTGGATT	1	chrIV_126538_T_A	72	2	0	firstTileUTR	TRUE
firstTileUTR_00947	YDL184C_5UTR_0	YDL184C_5UTR	chrIV	130506	-	GGCGCGCCGGTTCTTTTAGTACAAAATGGAACGGATATAAGATAAATGAGAGTTGCTTAGAAGTCCAGTTTTATAGAAGACGAGGTCAGTTTCGTCTTGTTAAAATATCGTCCATCTGCCATGGGGAAAAGTGAAACTTTCGGGTAGGGTAA	2	chrIV_130517_G_T;chrIV_130640_G_A	134;11	11	0	firstTileUTR	FALSE
firstTileUTR_00948	YDL184C_5UTR_0	YDL184C_5UTR	chrIV	130506	-	GGCGCGCCGGTTCTTTTATTACAAAATGGAACGGATATAAGATAAATGAGAGTTGCTTAGAAGTCCAGTTTTATAGAAGACGAGGTCAGTTTCGTCTTGTTAAAATATCGTCCATCTGCCATGGGGAAAAGTGAAACTTTCGGGTAGGGTAA	2	chrIV_130517_G_T;chrIV_130640_G_A	134;11	21	0	firstTileUTR	FALSE
firstTileUTR_00949	YDL184C_5UTR_0	YDL184C_5UTR	chrIV	130506	-	GGCGCGCCGGTTCTTTTAGTACAAAATGGAACGGATATAAGATAAATGAGAGTTGCTTAGAAGTCCAGTTTTATAGAAGACGAGGTCAGTTTCGTCTTGTTAAAATATCGTCCATCTGCCATGGGGAAAAGTGAAACTTTCAGGTAGGGTAA	2	chrIV_130517_G_T;chrIV_130640_G_A	134;11	12	0	firstTileUTR	FALSE
firstTileUTR_00950	YDL184C_5UTR_0	YDL184C_5UTR	chrIV	130506	-	GGCGCGCCGGTTCTTTTATTACAAAATGGAACGGATATAAGATAAATGAGAGTTGCTTAGAAGTCCAGTTTTATAGAAGACGAGGTCAGTTTCGTCTTGTTAAAATATCGTCCATCTGCCATGGGGAAAAGTGAAACTTTCAGGTAGGGTAA	2	chrIV_130517_G_T;chrIV_130640_G_A	134;11	22	0	firstTileUTR	FALSE
firstTileUTR_00951	YDL183C_5UTR_0	YDL183C_5UTR	chrIV	131907	-	GGCGCGCCGGATACTGCTACGTTGAAAAGGAAAAATTTCATGGCTAACTAGTAACTGAAACTGTGCCAGATAGCACACCCTTTAGATACTATCTTGGCACAATGCCCGATGCTTACTCCCCGGCGGAGACAGCCGTCAAGTCCATCCATCCA	1	chrIV_131989_T_C	63	1	0	firstTileUTR	FALSE
firstTileUTR_00952	YDL183C_5UTR_0	YDL183C_5UTR	chrIV	131907	-	GGCGCGCCGGATACTGCTACGTTGAAAAGGAAAAATTTCATGGCTAACTAGTAACTGAAACTGTGCCAGATAGCACACCCTTTAGATACCATCTTGGCACAATGCCCGATGCTTACTCCCCGGCGGAGACAGCCGTCAAGTCCATCCATCCA	1	chrIV_131989_T_C	63	2	0	firstTileUTR	FALSE
firstTileUTR_00953	YDL179W_5UTR_0	YDL179W_5UTR	chrIV	138196	+	GGCGCGCCAGAGATCTATGAATGTCGATGCACTCTTCTACTGACCGCAAGCTGCCCAAATGCTTAAATACAGAAGCAAAGAGACACATATTTACCACGTTGCATGAATGTCCAAACTCACTGCACCGTTAAACAGAATTATAATAAGCAAGG	1	chrIV_138088_G_A	37	1	0	firstTileUTR	FALSE
firstTileUTR_00954	YDL179W_5UTR_0	YDL179W_5UTR	chrIV	138196	+	GGCGCGCCAGAGATCTATGAATGTCGATGCACTCTTCTACTGACCGCAAGCTGCCCAAATGCTTAAATACAGAAGCAAAGAGACACATATTTACCACGTTGCATGAATGTCCAAATTCACTGCACCGTTAAACAGAATTATAATAAGCAAGG	1	chrIV_138088_G_A	37	2	0	firstTileUTR	FALSE
firstTileUTR_00955	YDL178W_5UTR_0	YDL178W_5UTR	chrIV	139497	+	GGCGCGCCGGATTAATGTCTGTAAAATAAAGAGAAGAAGTTGTCAATGCATTTATTACCACTTTTTCAGAGTCAGATAGATTTTGAATTATATAACCTGTCAAAATGAAAAAAACTCGGCCGATATTCCTCGAGAAACAAGACGAATGCCAA	1	chrIV_139426_C_A	74	1	0	firstTileUTR	FALSE
firstTileUTR_00956	YDL178W_5UTR_0	YDL178W_5UTR	chrIV	139497	+	GGCGCGCCGGATTAATGTCTGTAAAATAAAGAGAAGAAGTTGTCAATGCATTTATTACCACTTTTTCAGAGTCAGATATATTTTGAATTATATAACCTGTCAAAATGAAAAAAACTCGGCCGATATTCCTCGAGAAACAAGACGAATGCCAA	1	chrIV_139426_C_A	74	2	0	firstTileUTR	FALSE
firstTileUTR_00957	YDL177C_5UTR_0	YDL177C_5UTR	chrIV	141785	-	GGCGCGCCAAAGGTTTTTTACAGCTGATGATTGATGCATGACTTATTTCCACAGTGCCGTATTTTCTCAGTTGCCGTTTTGGGTCTGCTTTTCACAATGCGAAGCTTTGTTGAAAAGAGCTCTAAGGTCAAAAACAATAGTAAGCTGATCGG	1	chrIV_141921_G_A	9	1	0	firstTileUTR	TRUE
firstTileUTR_00958	YDL177C_5UTR_0	YDL177C_5UTR	chrIV	141785	-	GGCGCGCCAAAGGTTTTTTACAGCTGATGATTGATGCATGACTTATTTCCACAGTGCCGTATTTTCTCAGTTGCCGTTTTGGGTCTGCTTTTCACAATGCGAAGCTTTGTTGAAAAGAGCTCTAAGGTCAAAAACAATAGTAAACTGATCGG	1	chrIV_141921_G_A	9	2	0	firstTileUTR	TRUE
firstTileUTR_00959	YDL176W_5UTR_0	YDL176W_5UTR	chrIV	141960	+	GGCGCGCCAGCAATTTTCAGGAAGGCAAGTACTTAATACCGATCAGCTTACTATTGTTTTTGACCTTAGAGCTCTTTTCAACAAAGCTTCGCATTGTGAAAAGCAGACCCAAAACGGCAACTGAGAAAATACGGCACTGTGGAAATAAGTCA	1	chrIV_141921_G_A	106	1	0	firstTileUTR	FALSE
firstTileUTR_00960	YDL176W_5UTR_0	YDL176W_5UTR	chrIV	141960	+	GGCGCGCCAGCAATTTTCAGGAAGGCAAGTACTTAATACCGATCAGTTTACTATTGTTTTTGACCTTAGAGCTCTTTTCAACAAAGCTTCGCATTGTGAAAAGCAGACCCAAAACGGCAACTGAGAAAATACGGCACTGTGGAAATAAGTCA	1	chrIV_141921_G_A	106	2	0	firstTileUTR	FALSE
firstTileUTR_00961	YDL175C_5UTR_0	YDL175C_5UTR	chrIV	145545	-	GGCGCGCCATCGTTGTACAGGTAAGGTTTAATTCTCTCTGATGCTGCCAATAGTCATAACTTTTTTCGAAATGTTTCTTCCCATCCCATTAGTGTTTGAAGGAAAAAAAGGCACTACCCGGATCATGAATACATTTGATGGTAATAATATAT	3	chrIV_145562_G_C;chrIV_145686_A_G;chrIV_145687_T_G	128;4;3	111	0	firstTileUTR	TRUE
firstTileUTR_00962	YDL175C_5UTR_0	YDL175C_5UTR	chrIV	145545	-	GGCGCGCCATCGTTGTACAGGTAACGTTTAATTCTCTCTGATGCTGCCAATAGTCATAACTTTTTTCGAAATGTTTCTTCCCATCCCATTAGTGTTTGAAGGAAAAAAAGGCACTACCCGGATCATGAATACATTTGATGGTAATAATATAT	3	chrIV_145562_G_C;chrIV_145686_A_G;chrIV_145687_T_G	128;4;3	211	0	firstTileUTR	TRUE
firstTileUTR_00963	YDL175C_5UTR_0	YDL175C_5UTR	chrIV	145545	-	GGCGCGCCATCGTTGTACAGGTAAGGTTTAATTCTCTCTGATGCTGCCAATAGTCATAACTTTTTTCGAAATGTTTCTTCCCATCCCATTAGTGTTTGAAGGAAAAAAAGGCACTACCCGGATCATGAATACATTTGATGGTAATAATGTAT	3	chrIV_145562_G_C;chrIV_145686_A_G;chrIV_145687_T_G	128;4;3	121	0	firstTileUTR	TRUE
firstTileUTR_00964	YDL175C_5UTR_0	YDL175C_5UTR	chrIV	145545	-	GGCGCGCCATCGTTGTACAGGTAAGGTTTAATTCTCTCTGATGCTGCCAATAGTCATAACTTTTTTCGAAATGTTTCTTCCCATCCCATTAGTGTTTGAAGGAAAAAAAGGCACTACCCGGATCATGAATACATTTGATGGTAATAATAGAT	3	chrIV_145562_G_C;chrIV_145686_A_G;chrIV_145687_T_G	128;4;3	112	0	firstTileUTR	TRUE
firstTileUTR_00965	YDL175C_5UTR_0	YDL175C_5UTR	chrIV	145545	-	GGCGCGCCATCGTTGTACAGGTAACGTTTAATTCTCTCTGATGCTGCCAATAGTCATAACTTTTTTCGAAATGTTTCTTCCCATCCCATTAGTGTTTGAAGGAAAAAAAGGCACTACCCGGATCATGAATACATTTGATGGTAATAATGGAT	3	chrIV_145562_G_C;chrIV_145686_A_G;chrIV_145687_T_G	128;4;3	222	0	firstTileUTR	TRUE
firstTileUTR_00966	YDL169C_5UTR_0	YDL169C_5UTR	chrIV	158774	-	GGCGCGCCGCATTTAACGCTGGTACTGATTTCAATTTATCCTTATCAAATGATACGCTCTTTCCCTTTAAAAAGCGCCCTTACCTCGTTCCGAACGGCGCTAGTAAGAATTTCATCAAATTGCCCTTCTTGTGGGGGGATGCTCATCACAGA	1	chrIV_158816_T_TC	103	1	0	firstTileUTR	TRUE
firstTileUTR_00967	YDL169C_5UTR_0	YDL169C_5UTR	chrIV	158774	-	GGCGCGCCGCATTTAACGCTGGTACTGATTTCAATTTATCCTTATCAAATCGATACGCTCTTTCCCTTTAAAAAGCGCCCTTACCTCGTTCCGAACGGCGCTAGTAAGAATTTCATCAAATTGCCCTTCTTGTGGGGGGATGCTCATCACAGA	1	chrIV_158816_T_TC	103	2	0	firstTileUTR	TRUE
firstTileUTR_00968	YDL168W_5UTR_0	YDL168W_5UTR	chrIV	159562	+	GGCGCGCCGTAGAAGTAAACTTAACGATTCAAGGGTCAGTACTTTCTCAAGCTGGTATAAGCACACGGATGTCCTTCCCTTTATAAGTGAATTTTTTCATCTTTCTTCCTCTATGAAATTCCATTATTACGTAACTTACAGAGGTAAAAAGA	2	chrIV_159428_T_C;chrIV_159505_T_C	11;88	11	0	firstTileUTR	TRUE
firstTileUTR_00969	YDL168W_5UTR_0	YDL168W_5UTR	chrIV	159562	+	GGCGCGCCGTAGAAGTAAACTTAACGATTCAAGGGTCAGTACTTTCTCAAGCTGGTATAAGCACACGGATGTCCTTCCCTTTATAAGTGAATTTTTTCATCTTTCTTCCTCTATGAAATTCCATTATTACGTAACTTACAGGGGTAAAAAGA	2	chrIV_159428_T_C;chrIV_159505_T_C	11;88	21	0	firstTileUTR	TRUE
firstTileUTR_00970	YDL168W_5UTR_0	YDL168W_5UTR	chrIV	159562	+	GGCGCGCCGTAGAAGTAAACTTAACGATTCAAGGGTCAGTACTTTCTCAAGCTGGTATAAGCACGCGGATGTCCTTCCCTTTATAAGTGAATTTTTTCATCTTTCTTCCTCTATGAAATTCCATTATTACGTAACTTACAGAGGTAAAAAGA	2	chrIV_159428_T_C;chrIV_159505_T_C	11;88	12	0	firstTileUTR	TRUE
firstTileUTR_00971	YDL168W_5UTR_0	YDL168W_5UTR	chrIV	159562	+	GGCGCGCCGTAGAAGTAAACTTAACGATTCAAGGGTCAGTACTTTCTCAAGCTGGTATAAGCACGCGGATGTCCTTCCCTTTATAAGTGAATTTTTTCATCTTTCTTCCTCTATGAAATTCCATTATTACGTAACTTACAGGGGTAAAAAGA	2	chrIV_159428_T_C;chrIV_159505_T_C	11;88	22	0	firstTileUTR	TRUE
firstTileUTR_00972	YDL166C_5UTR_0	YDL166C_5UTR	chrIV	164096	-	GGCGCGCCGTGTATGATTTATAAAGAGTGAGCTCTTTTGTTATGAAGTATATTATTATGTGAGTATTTTTTTATAACTGCGAAAAAGCGAGGCGAACATTAATAAGATAATAGCAAAACAGGCATTTTTTAAACTAGATATGCAAAAACCAC	2	chrIV_164200_A_G;chrIV_164238_C_T	41;3	11	0	firstTileUTR	FALSE
firstTileUTR_00973	YDL166C_5UTR_0	YDL166C_5UTR	chrIV	164096	-	GGCGCGCCGTGTATGATTTATAAAGAGTGAGCTCTTTTGTTATGAAGTATATTATTATGTGAGTATTTTTTTATAACTGCGAAAAAGCGAGGCGAACATTAATAAGATAATGGCAAAACAGGCATTTTTTAAACTAGATATGCAAAAACCAC	2	chrIV_164200_A_G;chrIV_164238_C_T	41;3	21	0	firstTileUTR	FALSE
firstTileUTR_00974	YDL166C_5UTR_0	YDL166C_5UTR	chrIV	164096	-	GGCGCGCCGTGTATGATTTATAAAGAGTGAGCTCTTTTGTTATGAAGTATATTATTATGTGAGTATTTTTTTATAACTGCGAAAAAGCGAGGCGAACATTAATAAGATAATAGCAAAACAGGCATTTTTTAAACTAGATATGCAAAAACTAC	2	chrIV_164200_A_G;chrIV_164238_C_T	41;3	12	0	firstTileUTR	FALSE
firstTileUTR_00975	YDL166C_5UTR_0	YDL166C_5UTR	chrIV	164096	-	GGCGCGCCGTGTATGATTTATAAAGAGTGAGCTCTTTTGTTATGAAGTATATTATTATGTGAGTATTTTTTTATAACTGCGAAAAAGCGAGGCGAACATTAATAAGATAATGGCAAAACAGGCATTTTTTAAACTAGATATGCAAAAACTAC	2	chrIV_164200_A_G;chrIV_164238_C_T	41;3	22	0	firstTileUTR	FALSE
firstTileUTR_00976	YDL165W_5UTR_0	YDL165W_5UTR	chrIV	164241	+	GGCGCGCCGTGGTTTTTGCATATCTAGTTTAAAAAATGCCTGTTTTGCTATTATCTTATTAATGTTCGCCTCGCTTTTTCGCAGTTATAAAAAAATACTCACATAATAATATACTTCATAACAAAAGAGCTCACTCTTTATAAATCATACAC	2	chrIV_164200_A_G;chrIV_164238_C_T	104;142	11	0	firstTileUTR	TRUE
firstTileUTR_00977	YDL165W_5UTR_0	YDL165W_5UTR	chrIV	164241	+	GGCGCGCCGTGGTTTTTGCATATCTAGTTTAAAAAATGCCTGTTTTGCCATTATCTTATTAATGTTCGCCTCGCTTTTTCGCAGTTATAAAAAAATACTCACATAATAATATACTTCATAACAAAAGAGCTCACTCTTTATAAATCATACAC	2	chrIV_164200_A_G;chrIV_164238_C_T	104;142	21	0	firstTileUTR	TRUE
firstTileUTR_00978	YDL165W_5UTR_0	YDL165W_5UTR	chrIV	164241	+	GGCGCGCCGTAGTTTTTGCATATCTAGTTTAAAAAATGCCTGTTTTGCTATTATCTTATTAATGTTCGCCTCGCTTTTTCGCAGTTATAAAAAAATACTCACATAATAATATACTTCATAACAAAAGAGCTCACTCTTTATAAATCATACAC	2	chrIV_164200_A_G;chrIV_164238_C_T	104;142	12	0	firstTileUTR	TRUE
firstTileUTR_00979	YDL165W_5UTR_0	YDL165W_5UTR	chrIV	164241	+	GGCGCGCCGTAGTTTTTGCATATCTAGTTTAAAAAATGCCTGTTTTGCCATTATCTTATTAATGTTCGCCTCGCTTTTTCGCAGTTATAAAAAAATACTCACATAATAATATACTTCATAACAAAAGAGCTCACTCTTTATAAATCATACAC	2	chrIV_164200_A_G;chrIV_164238_C_T	104;142	22	0	firstTileUTR	TRUE
firstTileUTR_00980	YDL164C_5UTR_0	YDL164C_5UTR	chrIV	167305	-	GGCGCGCCACTTTTATTTTTGAACAAAGTACAGCGAGATGCAAACGCATGGCTTATTGCAGCTAAATTTCACTTTCACGCGTTTTCGCGTTAAGGTGAAAAATTCCATCAGCCATCTCAAGTGGAGGAACACATCGAAGCGAGCAAAAAGAT	1	chrIV_167436_GC_G	14	1	0	firstTileUTR	FALSE
firstTileUTR_00981	YDL164C_5UTR_0	YDL164C_5UTR	chrIV	167305	-	GGCGCGCCACTTTTATTTTTGAACAAAGTACAGCGAGATGCAAACGCATGGCTTATTGCAGCTAAATTTCACTTTCACGCGTTTTCGCGTTAAGGTGAAAAATTCCATCAGCCATCTCAAGTGGAGGAACACATCGAAGGAGCAAAAAGAT	1	chrIV_167436_GC_G	14	2	0	firstTileUTR	FALSE
firstTileUTR_00982	YDL160C_5UTR_0	YDL160C_5UTR	chrIV	172214	-	GGCGCGCCGATTGTCTTTTCTTGCAAACCCCAATGTTACAATCGCCCATTAGTTCTAAGATTGTGTTGTCCTTTTTCTTACGAAATTTTTTTCCCTCCCTTTTTTGATCACTGTCCTCGTTATAAGTGATTCGTGGGGTAACGGCGATATCA	1	chrIV_172218_T_C	141	1	0	firstTileUTR	TRUE
firstTileUTR_00983	YDL160C_5UTR_0	YDL160C_5UTR	chrIV	172214	-	GGCGCGCCGATCGTCTTTTCTTGCAAACCCCAATGTTACAATCGCCCATTAGTTCTAAGATTGTGTTGTCCTTTTTCTTACGAAATTTTTTTCCCTCCCTTTTTTGATCACTGTCCTCGTTATAAGTGATTCGTGGGGTAACGGCGATATCA	1	chrIV_172218_T_C	141	2	0	firstTileUTR	TRUE
firstTileUTR_00984	YDL159W_5UTR_0	YDL159W_5UTR	chrIV	172435	+	GGCGCGCCGCAGTTTTCTTATCATTAGTGTCGCTTCACATTAACCTGTAGGTCTTCTAATCCATCAGATGGGCCAATAATAGTATGATATCGCCGTTACCCCACGAATCACTTATAACGAGGACAGTGATCAAAAAAGGGAGGGAAAAAAAT	1	chrIV_172408_A_T	118	1	0	firstTileUTR	FALSE
firstTileUTR_00985	YDL159W_5UTR_0	YDL159W_5UTR	chrIV	172435	+	GGCGCGCCGCAGTTTTCTTATCATTAGTGTCGCTACACATTAACCTGTAGGTCTTCTAATCCATCAGATGGGCCAATAATAGTATGATATCGCCGTTACCCCACGAATCACTTATAACGAGGACAGTGATCAAAAAAGGGAGGGAAAAAAAT	1	chrIV_172408_A_T	118	2	0	firstTileUTR	FALSE
firstTileUTR_00986	YDL155W_5UTR_0	YDL155W_5UTR	chrIV	176643	+	GGCGCGCCGTTTTCTTTCGACCGGATCAAAAATGTTTTTATGTGTCCATGTTCTTGCATTTCAATATTTTTGTTTTCTTTTGTTTTGTTTTGTTCCTTCGCTTGTCGCCTCGTTCTGCTGAAAAGCGGGAGAGAAAAAAGGCAGTGCGGGTA	2	chrIV_176519_T_C;chrIV_176628_C_T	21;130	11	0	firstTileUTR	TRUE
firstTileUTR_00987	YDL155W_5UTR_0	YDL155W_5UTR	chrIV	176643	+	GGCGCGCCGTTTTCTTTCGACCGGATCAAAAATGTTTTTATGTGTCCATGTTCTTGCATTTCAATATTTTTGTTTTCTTTTGTTTTGTTTTGTTCCTTCGCTTGTCGCCTCGTTCTGCTGAAAAGCGGGAGGGAAAAAAGGCAGTGCGGGTA	2	chrIV_176519_T_C;chrIV_176628_C_T	21;130	21	0	firstTileUTR	TRUE
firstTileUTR_00988	YDL155W_5UTR_0	YDL155W_5UTR	chrIV	176643	+	GGCGCGCCGTTTTCTTTCGACCAGATCAAAAATGTTTTTATGTGTCCATGTTCTTGCATTTCAATATTTTTGTTTTCTTTTGTTTTGTTTTGTTCCTTCGCTTGTCGCCTCGTTCTGCTGAAAAGCGGGAGAGAAAAAAGGCAGTGCGGGTA	2	chrIV_176519_T_C;chrIV_176628_C_T	21;130	12	0	firstTileUTR	TRUE
firstTileUTR_00989	YDL155W_5UTR_0	YDL155W_5UTR	chrIV	176643	+	GGCGCGCCGTTTTCTTTCGACCAGATCAAAAATGTTTTTATGTGTCCATGTTCTTGCATTTCAATATTTTTGTTTTCTTTTGTTTTGTTTTGTTCCTTCGCTTGTCGCCTCGTTCTGCTGAAAAGCGGGAGGGAAAAAAGGCAGTGCGGGTA	2	chrIV_176519_T_C;chrIV_176628_C_T	21;130	22	0	firstTileUTR	TRUE
firstTileUTR_00990	YDL149W_5UTR_0	YDL149W_5UTR	chrIV	184880	+	GGCGCGCCGTCTTCTTATCAAAGTGAGATACTCATTACTTCACGGTGGTTATGGCGCTTCTTTTTGTTTAAAGTGTGGCTCCCCTAAAGTTCCGAAACTGGGTAACAATAACTAGAATAACATTACCAATGTTCAAAGAGGATGAGAAATTG	1	chrIV_184754_GA_G	19	1	0	firstTileUTR	TRUE
firstTileUTR_00991	YDL149W_5UTR_0	YDL149W_5UTR	chrIV	184880	+	GGCGCGCCGTCTTCTTATCAAAGTGAGATACTCATTACTTCACGGTGGTTATGGCGCTTCTTTTTGTTTAAAGTGTGGCTCCCCTAAAGTTCCGAAACTGGGTAACAATAACTAGAATAACATTACCAATGTCAAAGAGGATGAGAAATTG	1	chrIV_184754_GA_G	19	2	0	firstTileUTR	TRUE
firstTileUTR_00992	YDL147W_5UTR_0	YDL147W_5UTR	chrIV	190893	+	GGCGCGCCGGTAGTGAGCCCAGCAGTATATTCCTCTACTCTCTTAATTCAAGATTATCTCTGATGTAGTGTCCTGTTATGGTTTTTCCTTGGATTCCCCTTTGCATTTTGCCACCGAAAAGTCAAAAAGATCACATACAAGACGGGTAATAT	2	chrIV_190810_C_T;chrIV_190888_C_G	62;140	11	0	firstTileUTR	TRUE
firstTileUTR_00993	YDL147W_5UTR_0	YDL147W_5UTR	chrIV	190893	+	GGCGCGCCGGTAGTGAGCCCAGCAGTATATTCCTCTACTCTCTTAATTCAAGATTATCTCTGATGTAGTGTCCTGTTATGGTTTTTCCTTAGATTCCCCTTTGCATTTTGCCACCGAAAAGTCAAAAAGATCACATACAAGACGGGTAATAT	2	chrIV_190810_C_T;chrIV_190888_C_G	62;140	21	0	firstTileUTR	TRUE
firstTileUTR_00994	YDL147W_5UTR_0	YDL147W_5UTR	chrIV	190893	+	GGCGCGCCGGTACTGAGCCCAGCAGTATATTCCTCTACTCTCTTAATTCAAGATTATCTCTGATGTAGTGTCCTGTTATGGTTTTTCCTTGGATTCCCCTTTGCATTTTGCCACCGAAAAGTCAAAAAGATCACATACAAGACGGGTAATAT	2	chrIV_190810_C_T;chrIV_190888_C_G	62;140	12	0	firstTileUTR	TRUE
firstTileUTR_00995	YDL147W_5UTR_0	YDL147W_5UTR	chrIV	190893	+	GGCGCGCCGGTACTGAGCCCAGCAGTATATTCCTCTACTCTCTTAATTCAAGATTATCTCTGATGTAGTGTCCTGTTATGGTTTTTCCTTAGATTCCCCTTTGCATTTTGCCACCGAAAAGTCAAAAAGATCACATACAAGACGGGTAATAT	2	chrIV_190810_C_T;chrIV_190888_C_G	62;140	22	0	firstTileUTR	TRUE
firstTileUTR_00996	YDL146W_5UTR_0	YDL146W_5UTR	chrIV	192559	+	GGCGCGCCACGCTGCTATTAATGTCATTTAAATACCATAAACAGTTTACCGTTTTGACTTTTCACTTTTTTTTTGGGTGTCTTCTTTCCCCTGAAAAATTGAAAAACTAAAATTCCATTAATTGTCACCTTATGTTTTGTGTAAGCAAGTGA	1	chrIV_192451_G_A	37	1	0	firstTileUTR	TRUE
firstTileUTR_00997	YDL146W_5UTR_0	YDL146W_5UTR	chrIV	192559	+	GGCGCGCCACGCTGCTATTAATGTCATTTAAATACCATAAACAGTTTACCGTTTTGACTTTTCACTTTTTTTTTGGGTGTCTTCTTTCCCCTGAAAAATTGAAAAACTAAAATTCTATTAATTGTCACCTTATGTTTTGTGTAAGCAAGTGA	1	chrIV_192451_G_A	37	2	0	firstTileUTR	TRUE
firstTileUTR_00998	YDL144C_5UTR_0	YDL144C_5UTR	chrIV	199749	-	GGCGCGCCGCCAACTTGTATCCTGGCACCGGGACTGTAGTTTATGAGGTATATCAATATGTCCTAATTAAGGCTATATAATTTGGTATTACTATCACTTGCCACGGGGAAACTGAAATTTTTTTCGTTTCGCCACCAAGAAAGGCTAATTGA	1	chrIV_199794_T_C	100	1	0	firstTileUTR	TRUE
firstTileUTR_00999	YDL144C_5UTR_0	YDL144C_5UTR	chrIV	199749	-	GGCGCGCCGCCAACTTGTATCCTGGCACCGGGACTGTAGTTTATGAGGTATACCAATATGTCCTAATTAAGGCTATATAATTTGGTATTACTATCACTTGCCACGGGGAAACTGAAATTTTTTTCGTTTCGCCACCAAGAAAGGCTAATTGA	1	chrIV_199794_T_C	100	2	0	firstTileUTR	TRUE
firstTileUTR_01000	YDL143W_5UTR_0	YDL143W_5UTR	chrIV	199961	+	GGCGCGCCGCCGCACCTCCAATTACAATTCATAACCTTCATGCCCACTTAGCTATATCAACCTCTTGAACTGTATTCAATTAGCCTTTCTTGGTGGCGAAACGAAAAAAATTTCAGTTTCCCCGTGGCAAGTGATAGTAATACCAAATTATA	1	chrIV_199937_A_G	121	1	0	firstTileUTR	FALSE
firstTileUTR_01001	YDL143W_5UTR_0	YDL143W_5UTR	chrIV	199961	+	GGCGCGCCGCCGCACCTCCAATTACAATTCACAACCTTCATGCCCACTTAGCTATATCAACCTCTTGAACTGTATTCAATTAGCCTTTCTTGGTGGCGAAACGAAAAAAATTTCAGTTTCCCCGTGGCAAGTGATAGTAATACCAAATTATA	1	chrIV_199937_A_G	121	2	0	firstTileUTR	FALSE
firstTileUTR_01002	YDL141W_5UTR_0	YDL141W_5UTR	chrIV	202800	+	GGCGCGCCGGGATCTCTTACATGAAACCATATTAAATGTCAACCAACACTTCACAGTCATGTCTTCGAATCATTGTGCGGCGACTATTTCCGAAACTGGAGTGTGAAAAAGCTCGATTCATGAAGCCATCCTCTTAATCGGGAGTATACAAT	1	chrIV_202790_A_T	135	1	0	firstTileUTR	FALSE
firstTileUTR_01003	YDL141W_5UTR_0	YDL141W_5UTR	chrIV	202800	+	GGCGCGCCGGGATCTCTAACATGAAACCATATTAAATGTCAACCAACACTTCACAGTCATGTCTTCGAATCATTGTGCGGCGACTATTTCCGAAACTGGAGTGTGAAAAAGCTCGATTCATGAAGCCATCCTCTTAATCGGGAGTATACAAT	1	chrIV_202790_A_T	135	2	0	firstTileUTR	FALSE
firstTileUTR_01004	YDL139C_5UTR_0	YDL139C_5UTR	chrIV	212097	-	GGCGCGCCTTTATATATCATCTGATCCATTAGCTGAAAAATCGCGGTACTGAAGCTTTTTTCATGGCGCCCTTGAAACTTTCTCCTTCCGCCTGCGCATTATATAAAATACGTTACAATAGGAAAAGATGACAGTTACTTAAAGTAAAGCTT	2	chrIV_212222_A_G;chrIV_212228_TTAAAG_T	20;14	11	0	firstTileUTR	TRUE
firstTileUTR_01005	YDL139C_5UTR_0	YDL139C_5UTR	chrIV	212097	-	GGCGCGCCTTTATATATCATCTGATCCATTAGCTGAAAAATCGCGGTACTGAAGCTTTTTTCATGGCGCCCTTGAAACTTTCTCCTTCCGCCTGCGCATTATATAAAATACGTTACAATAGGAAAAGATGACGGTTACTTAAAGTAAAGCTT	2	chrIV_212222_A_G;chrIV_212228_TTAAAG_T	20;14	21	0	firstTileUTR	TRUE
firstTileUTR_01006	YDL139C_5UTR_0	YDL139C_5UTR	chrIV	212097	-	GGCGCGCCTTTATATATCATCTGATCCATTAGCTGAAAAATCGCGGTACTGAAGCTTTTTTCATGGCGCCCTTGAAACTTTCTCCTTCCGCCTGCGCATTATATAAAATACGTTACAATAGGAAAAGATGACAGTTACTTAAAGCTT	2	chrIV_212222_A_G;chrIV_212228_TTAAAG_T	20;14	12	0	firstTileUTR	TRUE
firstTileUTR_01007	YDL139C_5UTR_0	YDL139C_5UTR	chrIV	212097	-	GGCGCGCCTTTATATATCATCTGATCCATTAGCTGAAAAATCGCGGTACTGAAGCTTTTTTCATGGCGCCCTTGAAACTTTCTCCTTCCGCCTGCGCATTATATAAAATACGTTACAATAGGAAAAGATGACGGTTACTTAAAGCTT	2	chrIV_212222_A_G;chrIV_212228_TTAAAG_T	20;14	22	0	firstTileUTR	TRUE
firstTileUTR_01008	YDL138W_5UTR_0	YDL138W_5UTR	chrIV	213175	+	GGCGCGCCGATGCTCTCCACTTATGAAATAGATACGCTGAAGAGCTTATGTCTGTTCCATGTATATGTTCTACTTTCGAGGTGGAGGAAGAAGCAAAGGGGAAGCGTGTACGGCAGGTAGTCACCGTTGAGTCGGTAATGAGATAATAGCCA	2	chrIV_213112_A_G;chrIV_213154_A_AT	82;124	11	0	firstTileUTR	FALSE
firstTileUTR_01009	YDL138W_5UTR_0	YDL138W_5UTR	chrIV	213175	+	GGCGCGCCGATGCTCTCCACTTATGAAATAGATACGCTGAAGAGCTTATGTCTGTTCCATGTATATGTTCCACTTTCGAGGTGGAGGAAGAAGCAAAGGGGAAGCGTGTACGGCAGGTAGTCACCGTTGAGTCGGTAATGAGATAATAGCCA	2	chrIV_213112_A_G;chrIV_213154_A_AT	82;124	21	0	firstTileUTR	FALSE
firstTileUTR_01010	YDL138W_5UTR_0	YDL138W_5UTR	chrIV	213175	+	GGCGCGCCGATGCTCTCCACTTATGAAAATAGATACGCTGAAGAGCTTATGTCTGTTCCATGTATATGTTCTACTTTCGAGGTGGAGGAAGAAGCAAAGGGGAAGCGTGTACGGCAGGTAGTCACCGTTGAGTCGGTAATGAGATAATAGCCA	2	chrIV_213112_A_G;chrIV_213154_A_AT	82;124	12	0	firstTileUTR	FALSE
firstTileUTR_01011	YDL138W_5UTR_0	YDL138W_5UTR	chrIV	213175	+	GGCGCGCCGATGCTCTCCACTTATGAAAATAGATACGCTGAAGAGCTTATGTCTGTTCCATGTATATGTTCCACTTTCGAGGTGGAGGAAGAAGCAAAGGGGAAGCGTGTACGGCAGGTAGTCACCGTTGAGTCGGTAATGAGATAATAGCCA	2	chrIV_213112_A_G;chrIV_213154_A_AT	82;124	22	0	firstTileUTR	FALSE
firstTileUTR_01012	YDL137W_5UTR_0	YDL137W_5UTR	chrIV	216056	+	GGCGCGCCAGTTCAACCGATAACAGGTGACGAGGTAACAATAATCGCACACGTCCGATCTCCTGTAAGGGTATATGTGTACTATTCAAAAGGAGTACGTGGAGGTGCAAGATCGAACAACAACAACCCGCATCTGGAACCCGGTGATTTAGG	2	chrIV_215967_G_C;chrIV_216024_TTGTTACCTCGTCACC_T	56;113	11	0	firstTileUTR	FALSE
firstTileUTR_01013	YDL137W_5UTR_0	YDL137W_5UTR	chrIV	216056	+	GGCGCGCCAGTTCAACCGATAACAGGTGACGAGGTAACAATAATCGCACACGTCCGATCTCCTGTAAGGGTATATGTGTACTATTCAAAAGGAGTAGGTGGAGGTGCAAGATCGAACAACAACAACCCGCATCTGGAACCCGGTGATTTAGG	2	chrIV_215967_G_C;chrIV_216024_TTGTTACCTCGTCACC_T	56;113	21	0	firstTileUTR	FALSE
firstTileUTR_01014	YDL137W_5UTR_0	YDL137W_5UTR	chrIV	216056	+	GGCGCGCCAGTTCAACCGATAACAATAATCGCACACGTCCGATCTCCTGTAAGGGTATATGTGTACTATTCAAAAGGAGTACGTGGAGGTGCAAGATCGAACAACAACAACCCGCATCTGGAACCCGGTGATTTAGG	2	chrIV_215967_G_C;chrIV_216024_TTGTTACCTCGTCACC_T	56;113	12	0	firstTileUTR	FALSE
firstTileUTR_01015	YDL137W_5UTR_0	YDL137W_5UTR	chrIV	216056	+	GGCGCGCCAGTTCAACCGATAACAATAATCGCACACGTCCGATCTCCTGTAAGGGTATATGTGTACTATTCAAAAGGAGTAGGTGGAGGTGCAAGATCGAACAACAACAACCCGCATCTGGAACCCGGTGATTTAGG	2	chrIV_215967_G_C;chrIV_216024_TTGTTACCTCGTCACC_T	56;113	22	0	firstTileUTR	FALSE
firstTileUTR_01016	YDL135C_5UTR_0	YDL135C_5UTR	chrIV	219333	-	GGCGCGCCGTGTGGCTAGAAAAAGAATCAAAGTAATACAAGCAGCCTGAAGAATGGAAGTTCTTTCCACTCAATCTTTATAACGTTTCCCTGATCTATCGCGAAATTTAAACGATCGCGTTAGAGAACCGTTTCACCCGGAGTAATGATCAG	1	chrIV_219340_C_A	138	1	0	firstTileUTR	FALSE
firstTileUTR_01017	YDL135C_5UTR_0	YDL135C_5UTR	chrIV	219333	-	GGCGCGCCGTGTGGATAGAAAAAGAATCAAAGTAATACAAGCAGCCTGAAGAATGGAAGTTCTTTCCACTCAATCTTTATAACGTTTCCCTGATCTATCGCGAAATTTAAACGATCGCGTTAGAGAACCGTTTCACCCGGAGTAATGATCAG	1	chrIV_219340_C_A	138	2	0	firstTileUTR	FALSE
firstTileUTR_01018	YDL134C_5UTR_0	YDL134C_5UTR	chrIV	221242	-	GGCGCGCCACTACTATGTGTTAGTCGATTAAAATAGCCGAAAATCTTTCAAGCACGACAGAAAGATTCATTATCATTCTCCATTTCACAGGTATTCCATTTTCCGTTCATTTTTTCACTTTTTGATTTTATCCTTAAAACCCGCCCGGTTCA	1	chrIV_221261_A_G	126	1	0	firstTileUTR	TRUE
firstTileUTR_01019	YDL134C_5UTR_0	YDL134C_5UTR	chrIV	221242	-	GGCGCGCCACTACTATGTGTTAGTCGGTTAAAATAGCCGAAAATCTTTCAAGCACGACAGAAAGATTCATTATCATTCTCCATTTCACAGGTATTCCATTTTCCGTTCATTTTTTCACTTTTTGATTTTATCCTTAAAACCCGCCCGGTTCA	1	chrIV_221261_A_G	126	2	0	firstTileUTR	TRUE
firstTileUTR_01020	YDL133C-A_5UTR_0	YDL133C-A_5UTR	chrIV	221819	-	GGCGCGCCGACTATCTTAGGATTGAAGTAAAATATAAGATGAAAACAGAAAACAAGCGAAATTTCAAAGAGAGAAGTGAAACAATAATGACGGATAACAATTATTTAACATTCAGAAATATTACATTCGTTAACTCTCCATATATATAAATC	2	chrIV_221893_C_T;chrIV_221899_T_A	71;65	11	0	firstTileUTR	FALSE
firstTileUTR_01021	YDL133C-A_5UTR_0	YDL133C-A_5UTR	chrIV	221819	-	GGCGCGCCGACTATCTTAGGATTGAAGTAAAATATAAGATGAAAACAGAAAACAAGCGAAATTTCAAAGAGAGAAGTGAAATAATAATGACGGATAACAATTATTTAACATTCAGAAATATTACATTCGTTAACTCTCCATATATATAAATC	2	chrIV_221893_C_T;chrIV_221899_T_A	71;65	21	0	firstTileUTR	FALSE
firstTileUTR_01022	YDL133C-A_5UTR_0	YDL133C-A_5UTR	chrIV	221819	-	GGCGCGCCGACTATCTTAGGATTGAAGTAAAATATAAGATGAAAACAGAAAACAAGCGAAATTTCAAAGAGAGAAGTGAAACAATAAAGACGGATAACAATTATTTAACATTCAGAAATATTACATTCGTTAACTCTCCATATATATAAATC	2	chrIV_221893_C_T;chrIV_221899_T_A	71;65	12	0	firstTileUTR	FALSE
firstTileUTR_01023	YDL133C-A_5UTR_0	YDL133C-A_5UTR	chrIV	221819	-	GGCGCGCCGACTATCTTAGGATTGAAGTAAAATATAAGATGAAAACAGAAAACAAGCGAAATTTCAAAGAGAGAAGTGAAATAATAAAGACGGATAACAATTATTTAACATTCAGAAATATTACATTCGTTAACTCTCCATATATATAAATC	2	chrIV_221893_C_T;chrIV_221899_T_A	71;65	22	0	firstTileUTR	FALSE
firstTileUTR_01024	YDL133W_5UTR_0	YDL133W_5UTR	chrIV	222292	+	GGCGCGCCGGAGACTTTGTGTTGTAGCTTAGAATTTCTTCCACTATATGAAAGCCAAGACCTCTTCTCCTCTTTCGACACTTCGTTTATTTCCACTTTCCCTTATTTAGTATTCATCGTTCAGAATGCTTTCTTTATTTCACGACGGTTACC	1	chrIV_222257_G_A	110	1	0	firstTileUTR	TRUE
firstTileUTR_01025	YDL133W_5UTR_0	YDL133W_5UTR	chrIV	222292	+	GGCGCGCCGGAGACTTTGTGTTGTAGCTTAGAATTTCTTCCATTATATGAAAGCCAAGACCTCTTCTCCTCTTTCGACACTTCGTTTATTTCCACTTTCCCTTATTTAGTATTCATCGTTCAGAATGCTTTCTTTATTTCACGACGGTTACC	1	chrIV_222257_G_A	110	2	0	firstTileUTR	TRUE
firstTileUTR_01026	YDL131W_5UTR_0	YDL131W_5UTR	chrIV	227357	+	GGCGCGCCGCACTTTTAAATGTGTAGCAAATAAAGGCCTAAACGCAACAAGAAGAAAGATAAATTTTGAAATCTGTTGCATATATATATTAGTATATAAGAGACTGCATGAAAATGCGAACAAACGCATGCTCAACACCACTCATGCGCAAT	4	chrIV_227285_T_A;chrIV_227289_A_G;chrIV_227299_A_G;chrIV_227300_A_G	73;77;87;88	1111	0	firstTileUTR	FALSE
firstTileUTR_01027	YDL131W_5UTR_0	YDL131W_5UTR	chrIV	227357	+	GGCGCGCCGCACTTTTAAATGTGTAGCAAATAAAGGCCTAAACGCAACAAGAAGAAAGATAAATTTTGAAATCTGTTGCTTATATATATTAGTATATAAGAGACTGCATGAAAATGCGAACAAACGCATGCTCAACACCACTCATGCGCAAT	4	chrIV_227285_T_A;chrIV_227289_A_G;chrIV_227299_A_G;chrIV_227300_A_G	73;77;87;88	2111	0	firstTileUTR	FALSE
firstTileUTR_01028	YDL131W_5UTR_0	YDL131W_5UTR	chrIV	227357	+	GGCGCGCCGCACTTTTAAATGTGTAGCAAATAAAGGCCTAAACGCAACAAGAAGAAAGATAAATTTTGAAATCTGCTGCATATATATATTAGTATATAAGAGACTGCATGAAAATGCGAACAAACGCATGCTCAACACCACTCATGCGCAAT	4	chrIV_227285_T_A;chrIV_227289_A_G;chrIV_227299_A_G;chrIV_227300_A_G	73;77;87;88	1211	0	firstTileUTR	FALSE
firstTileUTR_01029	YDL131W_5UTR_0	YDL131W_5UTR	chrIV	227357	+	GGCGCGCCGCACTTTTAAATGTGTAGCAAATAAAGGCCTAAACGCAACAAGAAGAAAGATAAATTCTGAAATCTGTTGCATATATATATTAGTATATAAGAGACTGCATGAAAATGCGAACAAACGCATGCTCAACACCACTCATGCGCAAT	4	chrIV_227285_T_A;chrIV_227289_A_G;chrIV_227299_A_G;chrIV_227300_A_G	73;77;87;88	1121	0	firstTileUTR	FALSE
firstTileUTR_01030	YDL131W_5UTR_0	YDL131W_5UTR	chrIV	227357	+	GGCGCGCCGCACTTTTAAATGTGTAGCAAATAAAGGCCTAAACGCAACAAGAAGAAAGATAAATCTTGAAATCTGTTGCATATATATATTAGTATATAAGAGACTGCATGAAAATGCGAACAAACGCATGCTCAACACCACTCATGCGCAAT	4	chrIV_227285_T_A;chrIV_227289_A_G;chrIV_227299_A_G;chrIV_227300_A_G	73;77;87;88	1112	0	firstTileUTR	FALSE
firstTileUTR_01031	YDL131W_5UTR_0	YDL131W_5UTR	chrIV	227357	+	GGCGCGCCGCACTTTTAAATGTGTAGCAAATAAAGGCCTAAACGCAACAAGAAGAAAGATAAATCCTGAAATCTGCTGCTTATATATATTAGTATATAAGAGACTGCATGAAAATGCGAACAAACGCATGCTCAACACCACTCATGCGCAAT	4	chrIV_227285_T_A;chrIV_227289_A_G;chrIV_227299_A_G;chrIV_227300_A_G	73;77;87;88	2222	0	firstTileUTR	FALSE
firstTileUTR_01032	YDL130W-A_5UTR_0	YDL130W-A_5UTR	chrIV	229152	+	GGCGCGCCGGATGACTGGGTGAAAGTGCTTCTTAATATCTACAATGGAGAGCTCAATTTTCTTATGAACGACTGAACTAAATATAATAAATAATTCCCCAGCCGCCCCCTAAAAGATAATAATGATGCTTGAAATAGTTAGCAAATAGAAAC	2	chrIV_229033_C_T;chrIV_229042_T_C	26;35	11	0	firstTileUTR	FALSE
firstTileUTR_01033	YDL130W-A_5UTR_0	YDL130W-A_5UTR	chrIV	229152	+	GGCGCGCCGGATGACTGGGTGAAAGTGCTTCTTAATATCTACAATGGAGAGCTCAATTTTCTTATGAACGACTGAACTAAATATAATAAATAATTCCCCAGCCGCCCCCTAAAAGATAATAATGATACTTGAAATAGTTAGCAAATAGAAAC	2	chrIV_229033_C_T;chrIV_229042_T_C	26;35	21	0	firstTileUTR	FALSE
firstTileUTR_01034	YDL130W-A_5UTR_0	YDL130W-A_5UTR	chrIV	229152	+	GGCGCGCCGGATGACTGGGTGAAAGTGCTTCTTAATATCTACAATGGAGAGCTCAATTTTCTTATGAACGACTGAACTAAATATAATAAATAATTCCCCAGCCGCCCCCTAAAAGATGATAATGATGCTTGAAATAGTTAGCAAATAGAAAC	2	chrIV_229033_C_T;chrIV_229042_T_C	26;35	12	0	firstTileUTR	FALSE
firstTileUTR_01035	YDL130W-A_5UTR_0	YDL130W-A_5UTR	chrIV	229152	+	GGCGCGCCGGATGACTGGGTGAAAGTGCTTCTTAATATCTACAATGGAGAGCTCAATTTTCTTATGAACGACTGAACTAAATATAATAAATAATTCCCCAGCCGCCCCCTAAAAGATGATAATGATACTTGAAATAGTTAGCAAATAGAAAC	2	chrIV_229033_C_T;chrIV_229042_T_C	26;35	22	0	firstTileUTR	FALSE
firstTileUTR_01036	YDL130W_5UTR_0	YDL130W_5UTR	chrIV	229889	+	GGCGCGCCGATTTCTTTGTTAGTCCAAGATTAACTGAAACTGCAATTCGTAATTTAACCTTGAAATATCACGAAGGGGCTTACAGATTCAACATCAAATGCTTATTTGGTATTACATTGGAAACTAGTTTTAGCAACCGTTAGCCGGAAGTT	3	chrIV_229828_G_C;chrIV_229843_A_C;chrIV_229868_T_A	84;99;124	111	0	firstTileUTR	TRUE
firstTileUTR_01037	YDL130W_5UTR_0	YDL130W_5UTR	chrIV	229889	+	GGCGCGCCGATTTCTTTGTTAGTCCAAGATTAACTGAAACTGCAATTCGTAATTTAACCTTGAAATATGACGAAGGGGCTTACAGATTCAACATCAAATGCTTATTTGGTATTACATTGGAAACTAGTTTTAGCAACCGTTAGCCGGAAGTT	3	chrIV_229828_G_C;chrIV_229843_A_C;chrIV_229868_T_A	84;99;124	211	0	firstTileUTR	TRUE
firstTileUTR_01038	YDL130W_5UTR_0	YDL130W_5UTR	chrIV	229889	+	GGCGCGCCGATTTCTTTGTTAGTCCAAGATTAACTGAAACTGCAATTCGTAATGTAACCTTGAAATATCACGAAGGGGCTTACAGATTCAACATCAAATGCTTATTTGGTATTACATTGGAAACTAGTTTTAGCAACCGTTAGCCGGAAGTT	3	chrIV_229828_G_C;chrIV_229843_A_C;chrIV_229868_T_A	84;99;124	121	0	firstTileUTR	TRUE
firstTileUTR_01039	YDL130W_5UTR_0	YDL130W_5UTR	chrIV	229889	+	GGCGCGCCGATTTCTTTGTTAGTCCAAGTTTAACTGAAACTGCAATTCGTAATTTAACCTTGAAATATCACGAAGGGGCTTACAGATTCAACATCAAATGCTTATTTGGTATTACATTGGAAACTAGTTTTAGCAACCGTTAGCCGGAAGTT	3	chrIV_229828_G_C;chrIV_229843_A_C;chrIV_229868_T_A	84;99;124	112	0	firstTileUTR	TRUE
firstTileUTR_01040	YDL130W_5UTR_0	YDL130W_5UTR	chrIV	229889	+	GGCGCGCCGATTTCTTTGTTAGTCCAAGTTTAACTGAAACTGCAATTCGTAATGTAACCTTGAAATATGACGAAGGGGCTTACAGATTCAACATCAAATGCTTATTTGGTATTACATTGGAAACTAGTTTTAGCAACCGTTAGCCGGAAGTT	3	chrIV_229828_G_C;chrIV_229843_A_C;chrIV_229868_T_A	84;99;124	222	0	firstTileUTR	TRUE
firstTileUTR_01041	YDL129W_5UTR_0	YDL129W_5UTR	chrIV	230919	+	GGCGCGCCATAGGTGTATTGCTAAGCCTGTAAGGACCGACGTATGTCCAACTTAGGGAGCTTTACATGTGTCAAAGAACCTTTCATTCCCGATGAGTAAAAATTTTAAAAATGTGCGCGGGAGAAGCTTCGGTCGGCGTCGCCATCAAAGGG	1	chrIV_230893_C_T	119	1	0	firstTileUTR	FALSE
firstTileUTR_01042	YDL129W_5UTR_0	YDL129W_5UTR	chrIV	230919	+	GGCGCGCCATAGGTGTATTGCTAAGCCTGTAAGAACCGACGTATGTCCAACTTAGGGAGCTTTACATGTGTCAAAGAACCTTTCATTCCCGATGAGTAAAAATTTTAAAAATGTGCGCGGGAGAAGCTTCGGTCGGCGTCGCCATCAAAGGG	1	chrIV_230893_C_T	119	2	0	firstTileUTR	FALSE
firstTileUTR_01043	YDL128W_5UTR_0	YDL128W_5UTR	chrIV	232583	+	GGCGCGCCAGGACTGCTTTTTAAGTTTAGGAAAGAGGAAACTTCTTTTACTCTCTGAGGAGATAAAATAATGCTGGGCGATAGTAATTTCCATATTCTCGTGAGGGAAATTTTTATTTTTCGGGAATTTTGATCAAGCCGTCCAGTCCAGTT	1	chrIV_232542_TAAAAGAAGTTTCCTCTTTCCTAAACTTA_T	104	1	0	firstTileUTR	TRUE
firstTileUTR_01044	YDL128W_5UTR_0	YDL128W_5UTR	chrIV	232583	+	GGCGCGCCAGGACTGCTTTTACTCTCTGAGGAGATAAAATAATGCTGGGCGATAGTAATTTCCATATTCTCGTGAGGGAAATTTTTATTTTTCGGGAATTTTGATCAAGCCGTCCAGTCCAGTT	1	chrIV_232542_TAAAAGAAGTTTCCTCTTTCCTAAACTTA_T	104	2	0	firstTileUTR	TRUE
firstTileUTR_01045	YDL127W_5UTR_0	YDL127W_5UTR	chrIV	234863	+	GGCGCGCCGGGTCTTACTTTTATAAAGGAGAATTATAAAGTGAAAGAAAGGAGAACTTATAAGACTAAAGAAAAAAACACTTAAGAAGCACTTAAACTTGCATTAGATGTGTAAATCGATCAACCTGTAACATGTTTGAGGAAGGTCTCACA	1	chrIV_234747_G_GT	29	1	0	firstTileUTR	FALSE
firstTileUTR_01046	YDL127W_5UTR_0	YDL127W_5UTR	chrIV	234863	+	GGCGCGCCGGGTCTTACTTTTATAAAGGAGAATTATAAAGTGAAAGAAAGGAGAACTTATAAGACTAAAGAAAAAAACACTTAAGAAGCACTTAAACTTGCATTAGATGTGTAAATCGATCAAACCTGTAACATGTTTGAGGAAGGTCTCACA	1	chrIV_234747_G_GT	29	2	0	firstTileUTR	FALSE
firstTileUTR_01047	YDL126C_5UTR_0	YDL126C_5UTR	chrIV	238708	-	GGCGCGCCGGCGTTGAGTCAAATCTTAATAGAACTAGATTAATTGACTACATCAACTGCGGATCTCTTAAATACACGGCCCTGATATATGTCCTTTTTTGCCACCGAATTCACATTCGAGGGGTTGCCGGGTAGTGCGCAAAAGGCGGTAGG	1	chrIV_238826_G_T	27	1	0	firstTileUTR	TRUE
firstTileUTR_01048	YDL126C_5UTR_0	YDL126C_5UTR	chrIV	238708	-	GGCGCGCCGGCGTTGAGTCAAATCTTAATAGAACTAGATTAATTGACTACATCAACTGCGGATCTCTTAAATACACGGCCCTGATATATGTCCTTTTTTGCCACCGAATTCACATTCGAGGGGTTTCCGGGTAGTGCGCAAAAGGCGGTAGG	1	chrIV_238826_G_T	27	2	0	firstTileUTR	TRUE
firstTileUTR_01049	YDL125C_5UTR_0	YDL125C_5UTR	chrIV	239816	-	GGCGCGCCACTGTTTTATGTGACCTCCTTTTGTACTTTTCAAGTTCTGTAGACAAGTGTCAATTCAACCTTTGAGGCTACGTGGCCAACAAGGTCTTGCGCGATTTACCGGTGTTTCCTTTGCGCCCCCTGCTCATGCCATCAAAACGGCAC	3	chrIV_239877_C_T;chrIV_239899_A_G;chrIV_239907_C_T	84;62;54	111	0	firstTileUTR	TRUE
firstTileUTR_01050	YDL125C_5UTR_0	YDL125C_5UTR	chrIV	239816	-	GGCGCGCCACTGTTTTATGTGACCTCCTTTTGTACTTTTCAAGTTCTGTAGACAAGTGTCAATTCAACTTTTGAGGCTACGTGGCCAACAAGGTCTTGCGCGATTTACCGGTGTTTCCTTTGCGCCCCCTGCTCATGCCATCAAAACGGCAC	3	chrIV_239877_C_T;chrIV_239899_A_G;chrIV_239907_C_T	84;62;54	211	0	firstTileUTR	TRUE
firstTileUTR_01051	YDL125C_5UTR_0	YDL125C_5UTR	chrIV	239816	-	GGCGCGCCACTGTTTTATGTGACCTCCTTTTGTACTTTTCAAGTTCTGTAGACAAGTGTCAATTCAACCTTTGAGGCTACGTGGCCAACAGGGTCTTGCGCGATTTACCGGTGTTTCCTTTGCGCCCCCTGCTCATGCCATCAAAACGGCAC	3	chrIV_239877_C_T;chrIV_239899_A_G;chrIV_239907_C_T	84;62;54	121	0	firstTileUTR	TRUE
firstTileUTR_01052	YDL125C_5UTR_0	YDL125C_5UTR	chrIV	239816	-	GGCGCGCCACTGTTTTATGTGACCTCCTTTTGTACTTTTCAAGTTCTGTAGACAAGTGTCAATTCAACCTTTGAGGCTACGTGGCCAACAAGGTCTTGTGCGATTTACCGGTGTTTCCTTTGCGCCCCCTGCTCATGCCATCAAAACGGCAC	3	chrIV_239877_C_T;chrIV_239899_A_G;chrIV_239907_C_T	84;62;54	112	0	firstTileUTR	TRUE
firstTileUTR_01053	YDL125C_5UTR_0	YDL125C_5UTR	chrIV	239816	-	GGCGCGCCACTGTTTTATGTGACCTCCTTTTGTACTTTTCAAGTTCTGTAGACAAGTGTCAATTCAACTTTTGAGGCTACGTGGCCAACAGGGTCTTGTGCGATTTACCGGTGTTTCCTTTGCGCCCCCTGCTCATGCCATCAAAACGGCAC	3	chrIV_239877_C_T;chrIV_239899_A_G;chrIV_239907_C_T	84;62;54	222	0	firstTileUTR	TRUE
firstTileUTR_01054	YDL124W_5UTR_0	YDL124W_5UTR	chrIV	240206	+	GGCGCGCCACATGTGTATCCATATCCACGTAGTATCCGACTATCAATATATCCGTATATATATATATATATATATGGGATGAGCGTATGTGAGTGTTTTCGTAGATATTCAAAATACGAGTAAAGGAGATCCTAGGTGTGGATTAGTAAGGG	1	chrIV_240090_T_C	29	1	0	firstTileUTR	FALSE
firstTileUTR_01055	YDL124W_5UTR_0	YDL124W_5UTR	chrIV	240206	+	GGCGCGCCACATGTGTATCCATATCCACGTAGTATCCGACTATCAATATATCCGTATATATATATATATATATATGGGATGAGCGTATGTGAGTGTTTTCGTAGATATTCAAAATACGAGTAAGGGAGATCCTAGGTGTGGATTAGTAAGGG	1	chrIV_240090_T_C	29	2	0	firstTileUTR	TRUE
firstTileUTR_01056	YDL116W_5UTR_0	YDL116W_5UTR	chrIV	251525	+	GGCGCGCCGGTTTTCAGGTTGAATTAGCTGATATACCTCGTTTTCGGACTTGCCTAAACAATTCAAATGTCGTATGTATTTGAGCATTTGGTCTAATTTTTCATATTTTCTTCACCGAAAACATCACTAAATACGAAAAAGTTGGACCAGCA	1	chrIV_251392_CT_C	12	1	0	firstTileUTR	TRUE
firstTileUTR_01057	YDL116W_5UTR_0	YDL116W_5UTR	chrIV	251525	+	GGCGCGCCGGTTTTCAGGTTGAATTAGCTGATATACCTCGTTTTCGGACTTGCCTAAACAATTCAAATGTCGTATGTATTTGAGCATTTGGTCTAATTTTTCATATTTTCTTCACCGAAAACATCACTAAATACGAAAAGTTGGACCAGCA	1	chrIV_251392_CT_C	12	2	0	firstTileUTR	TRUE
firstTileUTR_01058	YDL113C_5UTR_0	YDL113C_5UTR	chrIV	258618	-	GGCGCGCCAGTCATCTCTTCATTTTGGAGATGACTTGCTGTAAATCGATAAATATTGGCTTACTCAATAGCCATATCTTAAAGGGGGCACAATGGGTGAGTTGTCGGGTAAGGGAATGTAGATCACGTGAATGAAAATTCAAGTGTTTTTCG	1	chrIV_258728_G_T	35	1	0	firstTileUTR	TRUE
firstTileUTR_01059	YDL113C_5UTR_0	YDL113C_5UTR	chrIV	258618	-	GGCGCGCCAGTCATCTCTTCATTTTGGAGATGACTTGCTGTAAATCGATAAATATTGGCTTACTCAATAGCCATATCTTAAAGGGGGCACAATGGGTGAGTTGTCGGGTAAGGGAATTTAGATCACGTGAATGAAAATTCAAGTGTTTTTCG	1	chrIV_258728_G_T	35	2	0	firstTileUTR	TRUE
firstTileUTR_01060	YDL111C_5UTR_0	YDL111C_5UTR	chrIV	264179	-	GGCGCGCCAGACTATTAGTATCATTGTACTCCTTCACCATATAAGCTCTACGTTTCTTTTTTCTGAATATTAGAAAAAAATTTCGCCAACTAGGGTTCAAAATAATAGACTAGGGCACGGAAGAAAAGCACACCCTAGGGCTTTCGGAGATA	2	chrIV_264197_G_A;chrIV_264290_G_A	127;34	11	0	firstTileUTR	FALSE
firstTileUTR_01061	YDL111C_5UTR_0	YDL111C_5UTR	chrIV	264179	-	GGCGCGCCAGACTATTAGTATCATTATACTCCTTCACCATATAAGCTCTACGTTTCTTTTTTCTGAATATTAGAAAAAAATTTCGCCAACTAGGGTTCAAAATAATAGACTAGGGCACGGAAGAAAAGCACACCCTAGGGCTTTCGGAGATA	2	chrIV_264197_G_A;chrIV_264290_G_A	127;34	21	0	firstTileUTR	FALSE
firstTileUTR_01062	YDL111C_5UTR_0	YDL111C_5UTR	chrIV	264179	-	GGCGCGCCAGACTATTAGTATCATTGTACTCCTTCACCATATAAGCTCTACGTTTCTTTTTTCTGAATATTAGAAAAAAATTTCGCCAACTAGGGTTCAAAATAATAGACTAGGGCACAGAAGAAAAGCACACCCTAGGGCTTTCGGAGATA	2	chrIV_264197_G_A;chrIV_264290_G_A	127;34	12	0	firstTileUTR	FALSE
firstTileUTR_01063	YDL111C_5UTR_0	YDL111C_5UTR	chrIV	264179	-	GGCGCGCCAGACTATTAGTATCATTATACTCCTTCACCATATAAGCTCTACGTTTCTTTTTTCTGAATATTAGAAAAAAATTTCGCCAACTAGGGTTCAAAATAATAGACTAGGGCACAGAAGAAAAGCACACCCTAGGGCTTTCGGAGATA	2	chrIV_264197_G_A;chrIV_264290_G_A	127;34	22	0	firstTileUTR	FALSE
firstTileUTR_01064	YDL110C_5UTR_0	YDL110C_5UTR	chrIV	265021	-	GGCGCGCCACCCCTCTTTTTGTCAAGAGAAATAAGCTTCTGAAGTATTGTTTTCCTGGTGAAAAGTGTCTTATTTATATGGAGAAGGGATATTCGGCCTCGGTTTTAGGGGAGGAGCTGAAGAGTTGTCCCGCTCGAAAAAGACCCGTAAGC	1	chrIV_265022_AC_A	144	1	0	firstTileUTR	TRUE
firstTileUTR_01065	YDL110C_5UTR_0	YDL110C_5UTR	chrIV	265021	-	GGCGCGCCACCCTCTTTTTGTCAAGAGAAATAAGCTTCTGAAGTATTGTTTTCCTGGTGAAAAGTGTCTTATTTATATGGAGAAGGGATATTCGGCCTCGGTTTTAGGGGAGGAGCTGAAGAGTTGTCCCGCTCGAAAAAGACCCGTAAGC	1	chrIV_265022_AC_A	144	2	0	firstTileUTR	TRUE
firstTileUTR_01066	YDL107W_5UTR_0	YDL107W_5UTR	chrIV	268850	+	GGCGCGCCGTTGTTAAAATCTAAAAACGAATTCCATAATGATGGAAAAGAGTTAAAATTCAACACCAAAAAACAAGACGCATCAAGAAGTTTATTTGTATATGTTGAGGATACATCTAATGTCAATAACACAGATTCTACAAATTTTATAAA	2	chrIV_268714_A_G;chrIV_268735_G_T	9;30	11	0	firstTileUTR	FALSE
firstTileUTR_01067	YDL107W_5UTR_0	YDL107W_5UTR	chrIV	268850	+	GGCGCGCCGTTGTTAAAATCTAAAAACGAATTCCATAATGATGGAAAAGAGTTAAAATTCAACACCAAAAAACAAGACGCATCAAGAAGTTTATTTGTATATGTTGAGGATACATCTAATGTCAATAACACAGATTCTACAAACTTTATAAA	2	chrIV_268714_A_G;chrIV_268735_G_T	9;30	21	0	firstTileUTR	FALSE
firstTileUTR_01068	YDL107W_5UTR_0	YDL107W_5UTR	chrIV	268850	+	GGCGCGCCGTTGTTAAAATCTAAAAACGAATTCCATAATGATGGAAAAGAGTTAAAATTCAACACCAAAAAACAAGACGCATCAAGAAGTTTATTTGTATATGTTGAGGATACATCTAATGTAAATAACACAGATTCTACAAATTTTATAAA	2	chrIV_268714_A_G;chrIV_268735_G_T	9;30	12	0	firstTileUTR	FALSE
firstTileUTR_01069	YDL107W_5UTR_0	YDL107W_5UTR	chrIV	268850	+	GGCGCGCCGTTGTTAAAATCTAAAAACGAATTCCATAATGATGGAAAAGAGTTAAAATTCAACACCAAAAAACAAGACGCATCAAGAAGTTTATTTGTATATGTTGAGGATACATCTAATGTAAATAACACAGATTCTACAAACTTTATAAA	2	chrIV_268714_A_G;chrIV_268735_G_T	9;30	22	0	firstTileUTR	FALSE
firstTileUTR_01070	YDL105W_5UTR_0	YDL105W_5UTR	chrIV	272345	+	GGCGCGCCGATTGTCTGCTACTAGTATTTATCTCATCTTCTTGATATTATTTCACCTTTTCTGTTAACGCGTTGCGCGTTTCCTTTATCTCTGGTACTTAACAGTATATGGAGTTAAAAGTGTGGGATTGTTTGTCGTCTAAGTAAAACCAT	1	chrIV_272291_A_G	91	1	0	firstTileUTR	TRUE
firstTileUTR_01071	YDL105W_5UTR_0	YDL105W_5UTR	chrIV	272345	+	GGCGCGCCGATTGTCTGCTACTAGTATTTATCTCATCTTCTTGATATTATTTCACCTTTTCCGTTAACGCGTTGCGCGTTTCCTTTATCTCTGGTACTTAACAGTATATGGAGTTAAAAGTGTGGGATTGTTTGTCGTCTAAGTAAAACCAT	1	chrIV_272291_A_G	91	2	0	firstTileUTR	TRUE
firstTileUTR_01072	YDL104C_5UTR_0	YDL104C_5UTR	chrIV	274895	-	GGCGCGCCATCCTTTCTTCTACTCTACTTATTTCAGAGCTTGAGAATCGCTGTTTGCTTTAATTTCATTGTCAATTAATCATCGCGCAATGAAGATGCCACTCTTTCCATTGGCAGAGCGGATCCGCCAAATAGAAATTACATAAAACAAGT	1	chrIV_275006_CG_C	34	1	0	firstTileUTR	TRUE
firstTileUTR_01073	YDL104C_5UTR_0	YDL104C_5UTR	chrIV	274895	-	GGCGCGCCATCCTTTCTTCTACTCTACTTATTTCAGAGCTTGAGAATCGCTGTTTGCTTTAATTTCATTGTCAATTAATCATCGCGCAATGAAGATGCCACTCTTTCCATTGGCAGAGCGATCCGCCAAATAGAAATTACATAAAACAAGT	1	chrIV_275006_CG_C	34	2	0	firstTileUTR	TRUE
firstTileUTR_01074	YDL101C_5UTR_0	YDL101C_5UTR	chrIV	281861	-	GGCGCGCCGCCTTTTTTACTGTATGTTAAGCCCCTTTACTTGTTACTCTCGACTATAAAGGGTTCTCATTTCCTCCTTTTTCAACAATATCTAATAATTTTCCAAAATCATTTGAAAAATACCATGGAAATAAAATGGAAAAAAGTAAACAA	1	chrIV_281966_T_A	40	1	0	firstTileUTR	FALSE
firstTileUTR_01075	YDL101C_5UTR_0	YDL101C_5UTR	chrIV	281861	-	GGCGCGCCGCCTTTTTTACTGTATGTTAAGCCCCTTTACTTGTTACTCTCGACTATAAAGGGTTCTCATTTCCTCCTTTTTCAACAATATCTAATAATTTTCCAAAATCATTAGAAAAATACCATGGAAATAAAATGGAAAAAAGTAAACAA	1	chrIV_281966_T_A	40	2	0	firstTileUTR	FALSE
firstTileUTR_01076	YDL100C_5UTR_0	YDL100C_5UTR	chrIV	283212	-	GGCGCGCCGTTTTCCTAAACGCTGCGTTGGCTTCCCTCAACTTGTTTGAAGTTGCCACCGTTTTATCCATTTTCGCTTTTGAAAAAAAAAAAATGGTTGAGAATCCCCAGCACTATTAATTAGTACTATTGTTACGAAGATCTTGTGATAAA	1	chrIV_283285_GA_G	72	1	0	firstTileUTR	TRUE
firstTileUTR_01077	YDL100C_5UTR_0	YDL100C_5UTR	chrIV	283212	-	GGCGCGCCGTTTTCCTAAACGCTGCGTTGGCTTCCCTCAACTTGTTTGAAGTTGCCACCGTTTTATCCATTTTCGCTTTTGAAAAAAAAAAATGGTTGAGAATCCCCAGCACTATTAATTAGTACTATTGTTACGAAGATCTTGTGATAAA	1	chrIV_283285_GA_G	72	2	0	firstTileUTR	TRUE
firstTileUTR_01078	YDL099W_5UTR_0	YDL099W_5UTR	chrIV	283365	+	GGCGCGCCATCCCTTTTTTATCACAAGATCTTCGTAACAATAGTACTAATTAATAGTGCTGGGGATTCTCAACCATTTTTTTTTTTTCAAAAGCGAAAATGGATAAAACGGTGGCAACTTCAAACAAGTTGAGGGAAGCCAACGCAGCGTTT	1	chrIV_283285_GA_G	65	1	0	firstTileUTR	FALSE
firstTileUTR_01079	YDL099W_5UTR_0	YDL099W_5UTR	chrIV	283365	+	GGCGCGCCATCCCTTTTTTATCACAAGATCTTCGTAACAATAGTACTAATTAATAGTGCTGGGGATTCTCAACCATTTTTTTTTTTCAAAAGCGAAAATGGATAAAACGGTGGCAACTTCAAACAAGTTGAGGGAAGCCAACGCAGCGTTT	1	chrIV_283285_GA_G	65	2	0	firstTileUTR	FALSE
firstTileUTR_01080	YDL098C_5UTR_0	YDL098C_5UTR	chrIV	285175	-	GGCGCGCCGAATTTTTGTCAGCTAAGGCTTGTAGGAACTTCTGGTTTTGATGAACTTTCGCATCAACTGTTTTCTATTTAGCGGCGCATTCGATTAAACTTCTTCCTTTCTTAGGAGAAAAAAAAGAAAAATCATACTTATGTATTTTCTGC	1	chrIV_285234_C_T	86	1	0	firstTileUTR	TRUE
firstTileUTR_01081	YDL098C_5UTR_0	YDL098C_5UTR	chrIV	285175	-	GGCGCGCCGAATTTTTGTCAGCTAAGGCTTGTAGGAACTTCTGGTTTTGATGAACTTTCGCATCAATTGTTTTCTATTTAGCGGCGCATTCGATTAAACTTCTTCCTTTCTTAGGAGAAAAAAAAGAAAAATCATACTTATGTATTTTCTGC	1	chrIV_285234_C_T	86	2	0	firstTileUTR	TRUE
firstTileUTR_01082	YDL092W_5UTR_0	YDL092W_5UTR	chrIV	292758	+	GGCGCGCCACGTTTTTTGATTTGTATTAAAGAAGAGGTATGCCAACCCGTAAGTTAAACATTAACGTTAAGTATGGCTATTTTTTCAAATGAGAGATATATTATCCTTTTGCACGGGCGAGGAAGTAAGAATATGTAATTAGTTGTTTTGTA	2	chrIV_292644_C_T;chrIV_292751_A_G	31;138	11	0	firstTileUTR	TRUE
firstTileUTR_01083	YDL092W_5UTR_0	YDL092W_5UTR	chrIV	292758	+	GGCGCGCCACGTTTTTTGATTTGTATTAAAGAAGAGGTATGCCAACCCGTAAGTTAAACATTAACGTTAAGTATGGCTATTTTTTCAAATGAGAGATATATTATCCTTTTGCACGGGCGAGAAAGTAAGAATATGTAATTAGTTGTTTTGTA	2	chrIV_292644_C_T;chrIV_292751_A_G	31;138	21	0	firstTileUTR	TRUE
firstTileUTR_01084	YDL092W_5UTR_0	YDL092W_5UTR	chrIV	292758	+	GGCGCGCCACGTTTCTTGATTTGTATTAAAGAAGAGGTATGCCAACCCGTAAGTTAAACATTAACGTTAAGTATGGCTATTTTTTCAAATGAGAGATATATTATCCTTTTGCACGGGCGAGGAAGTAAGAATATGTAATTAGTTGTTTTGTA	2	chrIV_292644_C_T;chrIV_292751_A_G	31;138	12	0	firstTileUTR	TRUE
firstTileUTR_01085	YDL092W_5UTR_0	YDL092W_5UTR	chrIV	292758	+	GGCGCGCCACGTTTCTTGATTTGTATTAAAGAAGAGGTATGCCAACCCGTAAGTTAAACATTAACGTTAAGTATGGCTATTTTTTCAAATGAGAGATATATTATCCTTTTGCACGGGCGAGAAAGTAAGAATATGTAATTAGTTGTTTTGTA	2	chrIV_292644_C_T;chrIV_292751_A_G	31;138	22	0	firstTileUTR	TRUE
firstTileUTR_01086	YDL088C_5UTR_0	YDL088C_5UTR	chrIV	300131	-	GGCGCGCCGTGATATTCACAAACCTTTCTTCTTTCATAAGTACTCTCCTTCGAACAAAATTTTTCTAGCATCATTTTTTTATGTATGGCCCTACACAAAGCGTCTTCCGGGTAGTGTAGTAGCTGTCTTGCTGGCGTTAGTTGTCCGGTTAT	3	chrIV_300148_T_A;chrIV_300204_A_T;chrIV_300254_C_T	128;72;22	111	0	firstTileUTR	TRUE
firstTileUTR_01087	YDL088C_5UTR_0	YDL088C_5UTR	chrIV	300131	-	GGCGCGCCGTGATATTCACAAACCATTCTTCTTTCATAAGTACTCTCCTTCGAACAAAATTTTTCTAGCATCATTTTTTTATGTATGGCCCTACACAAAGCGTCTTCCGGGTAGTGTAGTAGCTGTCTTGCTGGCGTTAGTTGTCCGGTTAT	3	chrIV_300148_T_A;chrIV_300204_A_T;chrIV_300254_C_T	128;72;22	211	0	firstTileUTR	TRUE
firstTileUTR_01088	YDL088C_5UTR_0	YDL088C_5UTR	chrIV	300131	-	GGCGCGCCGTGATATTCACAAACCTTTCTTCTTTCATAAGTACTCTCCTTCGAACAAAATTTTTCTAGCATCATTTTTTTTTGTATGGCCCTACACAAAGCGTCTTCCGGGTAGTGTAGTAGCTGTCTTGCTGGCGTTAGTTGTCCGGTTAT	3	chrIV_300148_T_A;chrIV_300204_A_T;chrIV_300254_C_T	128;72;22	121	0	firstTileUTR	TRUE
firstTileUTR_01089	YDL088C_5UTR_0	YDL088C_5UTR	chrIV	300131	-	GGCGCGCCGTGATATTCACAAACCTTTCTTCTTTCATAAGTACTCTCCTTCGAACAAAATTTTTCTAGCATCATTTTTTTATGTATGGCCCTACACAAAGCGTCTTCCGGGTAGTGTAGTAGCTGTCTTGTTGGCGTTAGTTGTCCGGTTAT	3	chrIV_300148_T_A;chrIV_300204_A_T;chrIV_300254_C_T	128;72;22	112	0	firstTileUTR	TRUE
firstTileUTR_01090	YDL088C_5UTR_0	YDL088C_5UTR	chrIV	300131	-	GGCGCGCCGTGATATTCACAAACCATTCTTCTTTCATAAGTACTCTCCTTCGAACAAAATTTTTCTAGCATCATTTTTTTTTGTATGGCCCTACACAAAGCGTCTTCCGGGTAGTGTAGTAGCTGTCTTGTTGGCGTTAGTTGTCCGGTTAT	3	chrIV_300148_T_A;chrIV_300204_A_T;chrIV_300254_C_T	128;72;22	222	0	firstTileUTR	TRUE
firstTileUTR_01091	YDL087C_5UTR_0	YDL087C_5UTR	chrIV	301012	-	GGCGCGCCGGCAGCTTTCTGCTGGGAGTGTAGAGCCTTTTGTAGTATAACTTTTTGTTCTTTTCTTTCTTCTCTAATGCCTGAGGCTTCGGCGGTTATTCGGGTAATACATTAAGGAAGTTGCCATGATGTGGAAGAATACGACTAGTCAGT	2	chrIV_301033_G_A;chrIV_301039_C_T	124;118	11	0	firstTileUTR	TRUE
firstTileUTR_01092	YDL087C_5UTR_0	YDL087C_5UTR	chrIV	301012	-	GGCGCGCCGGCAGCTTTCTGCTGGGAGTATAGAGCCTTTTGTAGTATAACTTTTTGTTCTTTTCTTTCTTCTCTAATGCCTGAGGCTTCGGCGGTTATTCGGGTAATACATTAAGGAAGTTGCCATGATGTGGAAGAATACGACTAGTCAGT	2	chrIV_301033_G_A;chrIV_301039_C_T	124;118	21	0	firstTileUTR	TRUE
firstTileUTR_01093	YDL087C_5UTR_0	YDL087C_5UTR	chrIV	301012	-	GGCGCGCCGGCAGCTTTCTGCTGGGAGTGTAGAGTCTTTTGTAGTATAACTTTTTGTTCTTTTCTTTCTTCTCTAATGCCTGAGGCTTCGGCGGTTATTCGGGTAATACATTAAGGAAGTTGCCATGATGTGGAAGAATACGACTAGTCAGT	2	chrIV_301033_G_A;chrIV_301039_C_T	124;118	12	0	firstTileUTR	TRUE
firstTileUTR_01094	YDL087C_5UTR_0	YDL087C_5UTR	chrIV	301012	-	GGCGCGCCGGCAGCTTTCTGCTGGGAGTATAGAGTCTTTTGTAGTATAACTTTTTGTTCTTTTCTTTCTTCTCTAATGCCTGAGGCTTCGGCGGTTATTCGGGTAATACATTAAGGAAGTTGCCATGATGTGGAAGAATACGACTAGTCAGT	2	chrIV_301033_G_A;chrIV_301039_C_T	124;118	22	0	firstTileUTR	TRUE
firstTileUTR_01095	YDL086W_5UTR_0	YDL086W_5UTR	chrIV	301408	+	GGCGCGCCGCTTTATCTACTACCACGAGTTTATTACGGCGTCATTTTCAGTCTGACCCTTCTTTTATATAGTTTCTCCTAGTGAGGTTTTTCCGATAAAATTTCTTCCTGATCTTCACAAAGCATCCAGCAAAGTAGGAAAAAAGCTGAAAA	1	chrIV_301279_C_A	16	1	0	firstTileUTR	TRUE
firstTileUTR_01096	YDL086W_5UTR_0	YDL086W_5UTR	chrIV	301408	+	GGCGCGCCGCTTTATCTACTACCACGAGTTTATTACGGCGTCATTTTCAGTCTGACCCTTCTTTTATATAGTTTCTCCTAGTGAGGTTTTTCCGATAAAATTTCTTCCTGATCTTCACAAAGCATCCAGCAAAGTATGAAAAAAGCTGAAAA	1	chrIV_301279_C_A	16	2	0	firstTileUTR	TRUE
firstTileUTR_01097	YDL086C-A_5UTR_0	YDL086C-A_5UTR	chrIV	302218	-	GGCGCGCCGGAGCACGTTTGTTAAGATCTTCACTCTGTACACGCTATATACTAAATAACAATAAGAAAAAGAAAAAGAAGCACAATATAGGAAAGCGTTCTAATTAACTAAAGAAAAAAAAAAAATAAAAAAAAAATAAAAAAAAGGTAACT	5	chrIV_302250_C_T;chrIV_302259_T_C;chrIV_302333_A_T;chrIV_302334_AAT_A;chrIV_302347_TA_T	113;104;30;29;16	11111	0	firstTileUTR	FALSE
firstTileUTR_01098	YDL086C-A_5UTR_0	YDL086C-A_5UTR	chrIV	302218	-	GGCGCGCCGGAGCACGTTTGTTAAGATCTTCACTCTGTATACGCTATATACTAAATAACAATAAGAAAAAGAAAAAGAAGCACAATATAGGAAAGCGTTCTAATTAACTAAAGAAAAAAAAAAAATAAAAAAAAAATAAAAAAAAGGTAACT	5	chrIV_302250_C_T;chrIV_302259_T_C;chrIV_302333_A_T;chrIV_302334_AAT_A;chrIV_302347_TA_T	113;104;30;29;16	21111	0	firstTileUTR	FALSE
firstTileUTR_01099	YDL086C-A_5UTR_0	YDL086C-A_5UTR	chrIV	302218	-	GGCGCGCCGGAGCACGTTTGTTAAGATCTTCACTCTGTACACGCTATACACTAAATAACAATAAGAAAAAGAAAAAGAAGCACAATATAGGAAAGCGTTCTAATTAACTAAAGAAAAAAAAAAAATAAAAAAAAAATAAAAAAAAGGTAACT	5	chrIV_302250_C_T;chrIV_302259_T_C;chrIV_302333_A_T;chrIV_302334_AAT_A;chrIV_302347_TA_T	113;104;30;29;16	12111	0	firstTileUTR	FALSE
firstTileUTR_01100	YDL086C-A_5UTR_0	YDL086C-A_5UTR	chrIV	302218	-	GGCGCGCCGGAGCACGTTTGTTAAGATCTTCACTCTGTACACGCTATATACTAAATAACAATAAGAAAAAGAAAAAGAAGCACAATATAGGAAAGCGTTCTAATTAACTAAAGAAAAAAAAATAATAAAAAAAAAATAAAAAAAAGGTAACT	5	chrIV_302250_C_T;chrIV_302259_T_C;chrIV_302333_A_T;chrIV_302334_AAT_A;chrIV_302347_TA_T	113;104;30;29;16	11211	0	firstTileUTR	FALSE
firstTileUTR_01101	YDL086C-A_5UTR_0	YDL086C-A_5UTR	chrIV	302218	-	GGCGCGCCGGAGCACGTTTGTTAAGATCTTCACTCTGTACACGCTATATACTAAATAACAATAAGAAAAAGAAAAAGAAGCACAATATAGGAAAGCGTTCTAATTAACTAAAGAAAAAAAAAAAAAAAAAAAAATAAAAAAAAGGTAACT	5	chrIV_302250_C_T;chrIV_302259_T_C;chrIV_302333_A_T;chrIV_302334_AAT_A;chrIV_302347_TA_T	113;104;30;29;16	11121	0	firstTileUTR	FALSE
firstTileUTR_01102	YDL086C-A_5UTR_0	YDL086C-A_5UTR	chrIV	302218	-	GGCGCGCCGGAGCACGTTTGTTAAGATCTTCACTCTGTACACGCTATATACTAAATAACAATAAGAAAAAGAAAAAGAAGCACAATATAGGAAAGCGTTCTAATTAACTAAAGAAAAAAAAAAAATAAAAAAAAAATAAAAAAAGGTAACT	5	chrIV_302250_C_T;chrIV_302259_T_C;chrIV_302333_A_T;chrIV_302334_AAT_A;chrIV_302347_TA_T	113;104;30;29;16	11112	0	firstTileUTR	FALSE
firstTileUTR_01103	YDL086C-A_5UTR_0	YDL086C-A_5UTR	chrIV	302218	-	GGCGCGCCGGAGCACGTTTGTTAAGATCTTCACTCTGTATACGCTATACACTAAATAACAATAAGAAAAAGAAAAAGAAGCACAATATAGGAAAGCGTTCTAATTAACTAAAGAAAAAAAAATAAAAAAAAAAATAAAAAAAGGTAACT	5	chrIV_302250_C_T;chrIV_302259_T_C;chrIV_302333_A_T;chrIV_302334_AAT_A;chrIV_302347_TA_T	113;104;30;29;16	22222	0	firstTileUTR	FALSE
firstTileUTR_01104	YDL085C-A_5UTR_0	YDL085C-A_5UTR	chrIV	302729	-	GGCGCGCCGGTATTGCTAGAAATGCTTCAGCAATACTGTATAAAATATGGAAACGTTGCCATGGCAAGACAAAAGAAGTGATCTTGAGTGAAATAATAGAGCCCGGATGGCCGGGTAAATTCAACCGCTCGTACCGTTTATAATACGCATAA	2	chrIV_302749_C_T;chrIV_302868_G_T	125;6	11	0	firstTileUTR	FALSE
firstTileUTR_01105	YDL085C-A_5UTR_0	YDL085C-A_5UTR	chrIV	302729	-	GGCGCGCCGGTATTGCTAGAAATGCTTTAGCAATACTGTATAAAATATGGAAACGTTGCCATGGCAAGACAAAAGAAGTGATCTTGAGTGAAATAATAGAGCCCGGATGGCCGGGTAAATTCAACCGCTCGTACCGTTTATAATACGCATAA	2	chrIV_302749_C_T;chrIV_302868_G_T	125;6	21	0	firstTileUTR	FALSE
firstTileUTR_01106	YDL085C-A_5UTR_0	YDL085C-A_5UTR	chrIV	302729	-	GGCGCGCCGGTATTGCTAGAAATGCTTCAGCAATACTGTATAAAATATGGAAACGTTGCCATGGCAAGACAAAAGAAGTGATCTTGAGTGAAATAATAGAGCCCGGATGGCCGGGTAAATTCAACCGCTCGTACCGTTTATAATACTCATAA	2	chrIV_302749_C_T;chrIV_302868_G_T	125;6	12	0	firstTileUTR	FALSE
firstTileUTR_01107	YDL085C-A_5UTR_0	YDL085C-A_5UTR	chrIV	302729	-	GGCGCGCCGGTATTGCTAGAAATGCTTTAGCAATACTGTATAAAATATGGAAACGTTGCCATGGCAAGACAAAAGAAGTGATCTTGAGTGAAATAATAGAGCCCGGATGGCCGGGTAAATTCAACCGCTCGTACCGTTTATAATACTCATAA	2	chrIV_302749_C_T;chrIV_302868_G_T	125;6	22	0	firstTileUTR	FALSE
firstTileUTR_01108	YDL085W_5UTR_0	YDL085W_5UTR	chrIV	302917	+	GGCGCGCCACCGCACTCTGGGGAATGACTAAAATAGAGACATTTTCGGCGTTTATGCGTATTATAAACGGTACGAGCGGTTGAATTTACCCGGCCATCCGGGCTCTATTATTTCACTCAAGATCACTTCTTTTGTCTTGCCATGGCAACGTT	1	chrIV_302868_G_T	96	1	0	firstTileUTR	TRUE
firstTileUTR_01109	YDL085W_5UTR_0	YDL085W_5UTR	chrIV	302917	+	GGCGCGCCACCGCACTCTGGGGAATGACTAAAATAGAGACATTTTCGGCGTTTATGAGTATTATAAACGGTACGAGCGGTTGAATTTACCCGGCCATCCGGGCTCTATTATTTCACTCAAGATCACTTCTTTTGTCTTGCCATGGCAACGTT	1	chrIV_302868_G_T	96	2	0	firstTileUTR	TRUE
firstTileUTR_01110	YDL081C_5UTR_0	YDL081C_5UTR	chrIV	310188	-	GGCGCGCCATTCTTTTGATTTCTTTTACTAAAAATTATTCAGAACAGAAGAGATCGCAAACTTTATAAAGATATTTTTTTCAAATACCATGTAAAGGCATTCTTTAAAAAATGAAAAAAAAAAAATCATTACAAAGTTGCGTGGTATCATCT	1	chrIV_310329_A_T	4	1	0	firstTileUTR	FALSE
firstTileUTR_01111	YDL081C_5UTR_0	YDL081C_5UTR	chrIV	310188	-	GGCGCGCCATTCTTTTGATTTCTTTTACTAAAAATTATTCAGAACAGAAGAGATCGCAAACTTTATAAAGATATTTTTTTCAAATACCATGTAAAGGCATTCTTTAAAAAATGAAAAAAAAAAAATCATTACAAAGTTGCGTGGTATCTTCT	1	chrIV_310329_A_T	4	2	0	firstTileUTR	FALSE
firstTileUTR_01112	YDL048C_5UTR_0	YDL048C_5UTR	chrIV	368261	-	GGCGCGCCACAGCTACTGCAAACCAAGAAAAGCAACTGACAAGAATTAGATATCCTAATCATAGGGCACCGAATTTACTTCCATGTTTTTTCCAGCTCCACTTAGAATATATATATAAATGTATAAAGACGGAAATATGCGCTTTTGAGAAA	2	chrIV_368337_T_C;chrIV_368345_C_T	69;61	11	0	firstTileUTR	FALSE
firstTileUTR_01113	YDL048C_5UTR_0	YDL048C_5UTR	chrIV	368261	-	GGCGCGCCACAGCTACTGCAAACCAAGAAAAGCAACTGACAAGAATTAGATATCCTAATCATAGGGCACCGAATTTACTTCCACGTTTTTTCCAGCTCCACTTAGAATATATATATAAATGTATAAAGACGGAAATATGCGCTTTTGAGAAA	2	chrIV_368337_T_C;chrIV_368345_C_T	69;61	21	0	firstTileUTR	FALSE
firstTileUTR_01114	YDL048C_5UTR_0	YDL048C_5UTR	chrIV	368261	-	GGCGCGCCACAGCTACTGCAAACCAAGAAAAGCAACTGACAAGAATTAGATATCCTAATCATAGGGCACCGAATTTACTTCCATGTTTTTTTCAGCTCCACTTAGAATATATATATAAATGTATAAAGACGGAAATATGCGCTTTTGAGAAA	2	chrIV_368337_T_C;chrIV_368345_C_T	69;61	12	0	firstTileUTR	FALSE
firstTileUTR_01115	YDL048C_5UTR_0	YDL048C_5UTR	chrIV	368261	-	GGCGCGCCACAGCTACTGCAAACCAAGAAAAGCAACTGACAAGAATTAGATATCCTAATCATAGGGCACCGAATTTACTTCCACGTTTTTTTCAGCTCCACTTAGAATATATATATAAATGTATAAAGACGGAAATATGCGCTTTTGAGAAA	2	chrIV_368337_T_C;chrIV_368345_C_T	69;61	22	0	firstTileUTR	FALSE
firstTileUTR_01116	YDL046W_5UTR_0	YDL046W_5UTR	chrIV	371200	+	GGCGCGCCGGTTATGCTTTTCTGCCTTGGCGAATCAGCTCTTTAAGTAGCGCCAGTCTTTTATATTTCCCCTCCCGAGTGTTGATTAAAGTTTTTTTATTATCAGGGATTCCACCCTCTTTCAATAGATCCAAACCGTGGGAGGTGACGTTT	2	chrIV_371085_T_C;chrIV_371142_A_G	30;87	11	0	firstTileUTR	TRUE
firstTileUTR_01117	YDL046W_5UTR_0	YDL046W_5UTR	chrIV	371200	+	GGCGCGCCGGTTATGCTTTTCTGCCTTGGCGAATCAGCTCTTTAAGTAGCGCCAGTCTTTTATATTTCCCCTCCCGAGTGTTGATTAAAGTTTTTTTATTATCAGGGATTCCACCCTCTTTCGATAGATCCAAACCGTGGGAGGTGACGTTT	2	chrIV_371085_T_C;chrIV_371142_A_G	30;87	21	0	firstTileUTR	TRUE
firstTileUTR_01118	YDL046W_5UTR_0	YDL046W_5UTR	chrIV	371200	+	GGCGCGCCGGTTATGCTTTTCTGCCTTGGCGAATCAGCTCTTTAAGTAGCGCCAGTCTTTTATATCTCCCCTCCCGAGTGTTGATTAAAGTTTTTTTATTATCAGGGATTCCACCCTCTTTCAATAGATCCAAACCGTGGGAGGTGACGTTT	2	chrIV_371085_T_C;chrIV_371142_A_G	30;87	12	0	firstTileUTR	TRUE
firstTileUTR_01119	YDL046W_5UTR_0	YDL046W_5UTR	chrIV	371200	+	GGCGCGCCGGTTATGCTTTTCTGCCTTGGCGAATCAGCTCTTTAAGTAGCGCCAGTCTTTTATATCTCCCCTCCCGAGTGTTGATTAAAGTTTTTTTATTATCAGGGATTCCACCCTCTTTCGATAGATCCAAACCGTGGGAGGTGACGTTT	2	chrIV_371085_T_C;chrIV_371142_A_G	30;87	22	0	firstTileUTR	TRUE
firstTileUTR_01120	YDL045W-A_5UTR_0	YDL045W-A_5UTR	chrIV	372224	+	GGCGCGCCGGAAGTTTCGGCGAGCCCTCGTGTTGCTATGGTAAGACTTTTGTCTCACTTAAAGCCTCAAAGCTTTTATATTCTGCCTAAAATACTGGGAAAAGAATTAATATGTAAAGTCCGCATTACCCGGAGAACGAACCTGTCATCATA	1	chrIV_372110_C_T	31	1	0	firstTileUTR	FALSE
firstTileUTR_01121	YDL045W-A_5UTR_0	YDL045W-A_5UTR	chrIV	372224	+	GGCGCGCCGGAAGTTTCGGCGAGCCCTCGTGTTGCTATGGTAAGACTTTTGTCTCACTTAAAGCCTCAAAGCTTTTATATTCTGCCTAAAATACTGGGAAAAGAATTAATATGTAAAGTCCACATTACCCGGAGAACGAACCTGTCATCATA	1	chrIV_372110_C_T	31	2	0	firstTileUTR	FALSE
firstTileUTR_01122	YDL045C_5UTR_0	YDL045C_5UTR	chrIV	373718	-	GGCGCGCCGAGGTTCTTTCTATAGACGGATCCTTAGGTTCTTGCTAACCAACGTGTTGTATATGAAACCCATCTCCAAATTTTGAGCTCTTCCCATCCTTTTGTTTCCTCGGACTCAATGAATTTGAAATCTGCCGAACAAGCTAACTAAAA	1	chrIV_373723_T_C	140	1	0	firstTileUTR	TRUE
firstTileUTR_01123	YDL045C_5UTR_0	YDL045C_5UTR	chrIV	373718	-	GGCGCGCCGAGGCTCTTTCTATAGACGGATCCTTAGGTTCTTGCTAACCAACGTGTTGTATATGAAACCCATCTCCAAATTTTGAGCTCTTCCCATCCTTTTGTTTCCTCGGACTCAATGAATTTGAAATCTGCCGAACAAGCTAACTAAAA	1	chrIV_373723_T_C	140	2	0	firstTileUTR	TRUE
firstTileUTR_01124	YDL044C_5UTR_0	YDL044C_5UTR	chrIV	375314	-	GGCGCGCCAGTTCCCTCTTCTTCCTTTACAATTATCTCTCAAGTATAGCAAGCGTTGTCACATCACAGTTTTCGGCCTTGTTCGCCTAATTACATTTTTCTGAATAAATACGTATGTATGCTGCGAGTACTAGATACTGTTGATAAATGGTA	1	chrIV_375394_A_C	65	1	0	firstTileUTR	TRUE
firstTileUTR_01125	YDL044C_5UTR_0	YDL044C_5UTR	chrIV	375314	-	GGCGCGCCAGTTCCCTCTTCTTCCTTTACAATTATCTCTCAAGTATAGCAAGCGTTGTCACATCACAGTTTTCGGCCTTGTTCGCCTCATTACATTTTTCTGAATAAATACGTATGTATGCTGCGAGTACTAGATACTGTTGATAAATGGTA	1	chrIV_375394_A_C	65	2	0	firstTileUTR	TRUE
firstTileUTR_01126	YDL014W_5UTR_0	YDL014W_5UTR	chrIV	427221	+	GGCGCGCCGGCTATGTAAAACTTTTTGAAAGTTAGAGGAAGAAAGTATTATACATTCAAGAGAGATGAGCTTTCCAATTTGAAAAATTTTTCAAGAAAAAGAAAAAATTTGAAAAAAAAAAAAGAAAAATATAATAAACATATCATTTTGTA	1	chrIV_427105_CT_C	29	1	0	firstTileUTR	FALSE
firstTileUTR_01127	YDL014W_5UTR_0	YDL014W_5UTR	chrIV	427221	+	GGCGCGCCGGCTATGTAAAACTTTTTGAAAGTTAGAGGAAGAAAGTATTATACATTCAAGAGAGATGAGCTTTCCAATTTGAAAAATTTTTCAAGAAAAAGAAAAAATTTGAAAAAAAAAAAGAAAAATATAATAAACATATCATTTTGTA	1	chrIV_427105_CT_C	29	2	0	firstTileUTR	FALSE
firstTileUTR_01128	YDL013W_5UTR_0	YDL013W_5UTR	chrIV	428932	+	GGCGCGCCACGCTCTTCTTAATGATTAAGTCTTCGTTTTGGTCGCACACTGCCTCTCATCCATGTTAAATAGTAAATATTGCGACCTTGCGTATACAGTGATGTTTCTTATGGGCAAAGCCAAAAAAAAAAAAATACGTAAGAGTGACAGAT	2	chrIV_428805_ATT_ATTT;chrIV_428826_C_T	18;39	11	0	firstTileUTR	FALSE
firstTileUTR_01129	YDL013W_5UTR_0	YDL013W_5UTR	chrIV	428932	+	GGCGCGCCACGCTCTTCTTAATGATTAAGTCTTCGTTTTGGTCGCACACTGCCTCTCATCCATGTTAAATAGTAAATATTGCGACCTTGCGTATACAGTGATGTTTCTTATGGGCAAAGCCAAAAAAAAAAAAAATACGTAAGAGTGACAGAT	2	chrIV_428805_ATT_ATTT;chrIV_428826_C_T	18;39	21	0	firstTileUTR	FALSE
firstTileUTR_01130	YDL013W_5UTR_0	YDL013W_5UTR	chrIV	428932	+	GGCGCGCCACGCTCTTCTTAATGATTAAGTCTTCGTTTTGGTCGCACACTGCCTCTCATCCATGTTAAATAGTAAATATTGCGACCTTGCGTATACAGTGATGTTTCTTATGGACAAAGCCAAAAAAAAAAAAATACGTAAGAGTGACAGAT	2	chrIV_428805_ATT_ATTT;chrIV_428826_C_T	18;39	12	0	firstTileUTR	FALSE
firstTileUTR_01131	YDL013W_5UTR_0	YDL013W_5UTR	chrIV	428932	+	GGCGCGCCACGCTCTTCTTAATGATTAAGTCTTCGTTTTGGTCGCACACTGCCTCTCATCCATGTTAAATAGTAAATATTGCGACCTTGCGTATACAGTGATGTTTCTTATGGACAAAGCCAAAAAAAAAAAAAATACGTAAGAGTGACAGAT	2	chrIV_428805_ATT_ATTT;chrIV_428826_C_T	18;39	22	0	firstTileUTR	FALSE
firstTileUTR_01132	YDL012C_5UTR_0	YDL012C_5UTR	chrIV	431534	-	GGCGCGCCGGTTTATGGGCTATTGTATGGGTTTGTCTTAATATCCTTTTCGGTTGCGTAAATACTTTTTATATTTCAATATTTCACGATGCCGCTGATAGCATCGTTTAATACGAAAACTTCGAGCCATTTACCAAGAAATATTCTGGACTA	2	chrIV_431592_T_TTG;chrIV_431674_G_C	87;5	11	0	firstTileUTR	TRUE
firstTileUTR_01133	YDL012C_5UTR_0	YDL012C_5UTR	chrIV	431534	-	GGCGCGCCGGTTTATGGGCTATTGTATGGGTTTGTCTTAATATCCTTTTCGGTTGCGTAAATACTTTGTTTATATTTCAATATTTCACGATGCCGCTGATAGCATCGTTTAATACGAAAACTTCGAGCCATTTACCAAGAAATATTCTGGACTA	2	chrIV_431592_T_TTG;chrIV_431674_G_C	87;5	21	0	firstTileUTR	TRUE
firstTileUTR_01134	YDL012C_5UTR_0	YDL012C_5UTR	chrIV	431534	-	GGCGCGCCGGTTTATGGGCTATTGTATGGGTTTGTCTTAATATCCTTTTCGGTTGCGTAAATACTTTTTATATTTCAATATTTCACGATGCCGCTGATAGCATCGTTTAATACGAAAACTTCGAGCCATTTACCAAGAAATATTCTGCACTA	2	chrIV_431592_T_TTG;chrIV_431674_G_C	87;5	12	0	firstTileUTR	TRUE
firstTileUTR_01135	YDL012C_5UTR_0	YDL012C_5UTR	chrIV	431534	-	GGCGCGCCGGTTTATGGGCTATTGTATGGGTTTGTCTTAATATCCTTTTCGGTTGCGTAAATACTTTGTTTATATTTCAATATTTCACGATGCCGCTGATAGCATCGTTTAATACGAAAACTTCGAGCCATTTACCAAGAAATATTCTGCACTA	2	chrIV_431592_T_TTG;chrIV_431674_G_C	87;5	22	0	firstTileUTR	TRUE
firstTileUTR_01136	YDL010W_5UTR_0	YDL010W_5UTR	chrIV	432297	+	GGCGCGCCGCTAAGGTTTCGTCTTTTCTATCTTACGATAATTTGCTTAAAAGTTCATTTAGAGAATAGATAGTGATCTTTCCCAGTATAATGTTTTCCCGATTTCGCGAACGCTCCGCCTCAGGCGCCCCGGGACGCGTCATGCGCGTTCCA	1	chrIV_432174_C_T	22	1	0	firstTileUTR	TRUE
firstTileUTR_01137	YDL010W_5UTR_0	YDL010W_5UTR	chrIV	432297	+	GGCGCGCCGCTAAGGTTTCGTCTTTTCTATCTTACGATAATTTGCTTAAAAGTTCATTTAGAGAATAGATAGTGATCTTTCCCAGTATAATGTTTTCCCGATTTCGCGAACGCTCCGCCTCAGGCGCCCCAGGACGCGTCATGCGCGTTCCA	1	chrIV_432174_C_T	22	2	0	firstTileUTR	TRUE
firstTileUTR_01138	YDL008W_5UTR_0	YDL008W_5UTR	chrIV	433467	+	GGCGCGCCGTTAAACTCTCCCGATATTGTACAAAGTTTTTGAAGAATGCATTATTTTTTTATCTGCAGACACGGAAGATACAAAAGTTATCTCGGCAGCTTACCCTTTATATCGAATGCAGGCGTAGACAAAAGTGCGTTGCATAACTTACC	3	chrIV_433376_G_A;chrIV_433396_A_G;chrIV_433401_C_T	54;74;79	111	0	firstTileUTR	FALSE
firstTileUTR_01139	YDL008W_5UTR_0	YDL008W_5UTR	chrIV	433467	+	GGCGCGCCGTTAAACTCTCCCGATATTGTACAAAGTTTTTGAAGAATGCATTATTTTTTTATCTGCAGACACGGAAGATACAAAAGTTATCTCGGCAGTTTACCCTTTATATCGAATGCAGGCGTAGACAAAAGTGCGTTGCATAACTTACC	3	chrIV_433376_G_A;chrIV_433396_A_G;chrIV_433401_C_T	54;74;79	211	0	firstTileUTR	TRUE
firstTileUTR_01140	YDL008W_5UTR_0	YDL008W_5UTR	chrIV	433467	+	GGCGCGCCGTTAAACTCTCCCGATATTGTACAAAGTTTTTGAAGAATGCATTATTTTTTTATCTGCAGACACGGAAGACACAAAAGTTATCTCGGCAGCTTACCCTTTATATCGAATGCAGGCGTAGACAAAAGTGCGTTGCATAACTTACC	3	chrIV_433376_G_A;chrIV_433396_A_G;chrIV_433401_C_T	54;74;79	121	0	firstTileUTR	FALSE
firstTileUTR_01141	YDL008W_5UTR_0	YDL008W_5UTR	chrIV	433467	+	GGCGCGCCGTTAAACTCTCCCGATATTGTACAAAGTTTTTGAAGAATGCATTATTTTTTTATCTGCAGACACGAAAGATACAAAAGTTATCTCGGCAGCTTACCCTTTATATCGAATGCAGGCGTAGACAAAAGTGCGTTGCATAACTTACC	3	chrIV_433376_G_A;chrIV_433396_A_G;chrIV_433401_C_T	54;74;79	112	0	firstTileUTR	FALSE
firstTileUTR_01142	YDL008W_5UTR_0	YDL008W_5UTR	chrIV	433467	+	GGCGCGCCGTTAAACTCTCCCGATATTGTACAAAGTTTTTGAAGAATGCATTATTTTTTTATCTGCAGACACGAAAGACACAAAAGTTATCTCGGCAGTTTACCCTTTATATCGAATGCAGGCGTAGACAAAAGTGCGTTGCATAACTTACC	3	chrIV_433376_G_A;chrIV_433396_A_G;chrIV_433401_C_T	54;74;79	222	0	firstTileUTR	FALSE
firstTileUTR_01143	YDL007W_5UTR_0	YDL007W_5UTR	chrIV	438014	+	GGCGCGCCAACTTGAATTGACTGTAAGCTTGACACTGATACGCATCATATTCACTAATATTCACATTAACCTTCTTTTAGGTAAAAGAAAAGAGACATTTGCCACCGGAGAAAAACCGTTAATAACTCGTTACCCGGAGTGATAAAAATATT	4	chrIV_437881_C_T;chrIV_437890_T_C;chrIV_437896_G_A;chrIV_437955_A_G	12;21;27;86	1111	0	firstTileUTR	FALSE
firstTileUTR_01144	YDL007W_5UTR_0	YDL007W_5UTR	chrIV	438014	+	GGCGCGCCAACTTGAATTGACTGTAAGCTTGACACTGATACGCATCATATTCACTAATATTCACATTAACCTTCTTTTAGGTAAAAGAAAAGAGACATTTGCCACCGGAGAAAAACCGTTAATAACTCGTTACCCGGAGTAATAAAAATATT	4	chrIV_437881_C_T;chrIV_437890_T_C;chrIV_437896_G_A;chrIV_437955_A_G	12;21;27;86	2111	0	firstTileUTR	FALSE
firstTileUTR_01145	YDL007W_5UTR_0	YDL007W_5UTR	chrIV	438014	+	GGCGCGCCAACTTGAATTGACTGTAAGCTTGACACTGATACGCATCATATTCACTAATATTCACATTAACCTTCTTTTAGGTAAAAGAAAAGAGACATTTGCCACCGGAGAAAAACCGTTAATAACTCGTTGCCCGGAGTGATAAAAATATT	4	chrIV_437881_C_T;chrIV_437890_T_C;chrIV_437896_G_A;chrIV_437955_A_G	12;21;27;86	1211	0	firstTileUTR	FALSE
firstTileUTR_01146	YDL007W_5UTR_0	YDL007W_5UTR	chrIV	438014	+	GGCGCGCCAACTTGAATTGACTGTAAGCTTGACACTGATACGCATCATATTCACTAATATTCACATTAACCTTCTTTTAGGTAAAAGAAAAGAGACATTTGCCACCGGAGAAAAACCGTTAATAATTCGTTACCCGGAGTGATAAAAATATT	4	chrIV_437881_C_T;chrIV_437890_T_C;chrIV_437896_G_A;chrIV_437955_A_G	12;21;27;86	1121	0	firstTileUTR	FALSE
firstTileUTR_01147	YDL007W_5UTR_0	YDL007W_5UTR	chrIV	438014	+	GGCGCGCCAACTTGAATTGACTGTAAGCTTGACACTGATACGCATCATATTCACTAATATTCACATCAACCTTCTTTTAGGTAAAAGAAAAGAGACATTTGCCACCGGAGAAAAACCGTTAATAACTCGTTACCCGGAGTGATAAAAATATT	4	chrIV_437881_C_T;chrIV_437890_T_C;chrIV_437896_G_A;chrIV_437955_A_G	12;21;27;86	1112	0	firstTileUTR	FALSE
firstTileUTR_01148	YDL007W_5UTR_0	YDL007W_5UTR	chrIV	438014	+	GGCGCGCCAACTTGAATTGACTGTAAGCTTGACACTGATACGCATCATATTCACTAATATTCACATCAACCTTCTTTTAGGTAAAAGAAAAGAGACATTTGCCACCGGAGAAAAACCGTTAATAATTCGTTGCCCGGAGTAATAAAAATATT	4	chrIV_437881_C_T;chrIV_437890_T_C;chrIV_437896_G_A;chrIV_437955_A_G	12;21;27;86	2222	0	firstTileUTR	FALSE
firstTileUTR_01149	YDL006W_5UTR_0	YDL006W_5UTR	chrIV	439588	+	GGCGCGCCACTTTGTCTTTTGAGTTTTAGTTTCCTATAAAATTAGGACAACAAACCCTCTCAGATGTGTTCACCAGTTTTCCTTTGCAGTTAGAATTCGCGAAGGCCCCGACGCCCTACCTATATTAAGTTTTTGAAACAAATATTGCACGT	1	chrIV_439479_A_G	36	1	0	firstTileUTR	TRUE
firstTileUTR_01150	YDL006W_5UTR_0	YDL006W_5UTR	chrIV	439588	+	GGCGCGCCACTTTGTCTTTTGAGTTTTAGTTTCCTATAAAATTAGGACAACAAACCCTCTCAGATGTGTTCACCAGTTTTCCTTTGCAGTTAGAATTCGCGAAGGCCCCGACGCCCCACCTATATTAAGTTTTTGAAACAAATATTGCACGT	1	chrIV_439479_A_G	36	2	0	firstTileUTR	TRUE
firstTileUTR_01151	YDL004W_5UTR_0	YDL004W_5UTR	chrIV	442986	+	GGCGCGCCGAGGCTCTTTTAGCAGTGTGTGTACGATACCTTTATTGTTATCCTCCATCTAATTTAACATGAACTTTTACAATGATGGGACGGCCCCTTCCTAGACGACTCCATAATGCGCTTTGATTGGCTGGGCATCTATTTTCGTTAAAG	2	chrIV_442843_T_C;chrIV_442926_T_C	2;85	11	0	firstTileUTR	TRUE
firstTileUTR_01152	YDL004W_5UTR_0	YDL004W_5UTR	chrIV	442986	+	GGCGCGCCGAGGCTCTTTTAGCAGTGTGTGTACGATACCTTTATTGTTATCCTCCATCTAATTTAACATGAACTTTTACAATGATGGGACGGCCCCTTCCTAGACGACTCCATAATGCGCTTTGATTGGCTGGGCATCTATTTTCGTTAAGG	2	chrIV_442843_T_C;chrIV_442926_T_C	2;85	21	0	firstTileUTR	TRUE
firstTileUTR_01153	YDL004W_5UTR_0	YDL004W_5UTR	chrIV	442986	+	GGCGCGCCGAGGCTCTTTTAGCAGTGTGTGTACGATACCTTTATTGTTATCCTCCATCTAATTTAACGTGAACTTTTACAATGATGGGACGGCCCCTTCCTAGACGACTCCATAATGCGCTTTGATTGGCTGGGCATCTATTTTCGTTAAAG	2	chrIV_442843_T_C;chrIV_442926_T_C	2;85	12	0	firstTileUTR	TRUE
firstTileUTR_01154	YDL004W_5UTR_0	YDL004W_5UTR	chrIV	442986	+	GGCGCGCCGAGGCTCTTTTAGCAGTGTGTGTACGATACCTTTATTGTTATCCTCCATCTAATTTAACGTGAACTTTTACAATGATGGGACGGCCCCTTCCTAGACGACTCCATAATGCGCTTTGATTGGCTGGGCATCTATTTTCGTTAAGG	2	chrIV_442843_T_C;chrIV_442926_T_C	2;85	22	0	firstTileUTR	TRUE
firstTileUTR_01155	YDL003W_5UTR_0	YDL003W_5UTR	chrIV	444602	+	GGCGCGCCATTGGTTTAACAATTATGTTCTCGTGACAATGGGAAAAAGGTCGGCGATTTAAGCAATAATAATAGCAAAAAGAATACTTTTTAGCACCCTATATATATGTACATATATATATATATATCATAATGAAGACAAATTCTGCTACT	2	chrIV_444482_GATATATATATATATATGTAC_G;chrIV_444518_T_C	25;61	11	0	firstTileUTR	FALSE
firstTileUTR_01156	YDL003W_5UTR_0	YDL003W_5UTR	chrIV	444602	+	GGCGCGCCATTGGTTTAACAATTATGTTCTCGTGACAATGGGAAAAAGGTCGGCGATTTAAGCAATAATAATAGCAAAAAGAATACTTTTTAGCACCCTATATATATCATAATGAAGACAAATTCTGCTACT	2	chrIV_444482_GATATATATATATATATGTAC_G;chrIV_444518_T_C	25;61	21	0	firstTileUTR	FALSE
firstTileUTR_01157	YDL003W_5UTR_0	YDL003W_5UTR	chrIV	444602	+	GGCGCGCCATTGGTTTAACAATTATGTTCTCGTGACAATGGGAAAAAGGTCGGCGATTTAAGCAATAATAATAGCAAAAAGAATACTTTTTGGCACCCTATATATATGTACATATATATATATATATCATAATGAAGACAAATTCTGCTACT	2	chrIV_444482_GATATATATATATATATGTAC_G;chrIV_444518_T_C	25;61	12	0	firstTileUTR	FALSE
firstTileUTR_01158	YDL003W_5UTR_0	YDL003W_5UTR	chrIV	444602	+	GGCGCGCCATTGGTTTAACAATTATGTTCTCGTGACAATGGGAAAAAGGTCGGCGATTTAAGCAATAATAATAGCAAAAAGAATACTTTTTGGCACCCTATATATATCATAATGAAGACAAATTCTGCTACT	2	chrIV_444482_GATATATATATATATATGTAC_G;chrIV_444518_T_C	25;61	22	0	firstTileUTR	FALSE
firstTileUTR_01159	YDR001C_5UTR_0	YDR001C_5UTR	chrIV	452708	-	GGCGCGCCGATCGCGCAAGTTTCATATTGATAACCTTGTGAACCAGTCTATATATAGCCTTATATAAGTACTGCTCTATCAAACTTAAGATTGGTGGCCTTCTTCGGTAACTAGGGGATAAGGGGCTTCGTCCTACACGATGCTCCTGTCGT	2	chrIV_452771_C_T;chrIV_452803_T_C	82;50	11	0	firstTileUTR	TRUE
firstTileUTR_01160	YDR001C_5UTR_0	YDR001C_5UTR	chrIV	452708	-	GGCGCGCCGATCGCGCAAGTTTCATATTGATAACCTTGTGAACCAGTCTATATATAGCCTTATATAAGTATTGCTCTATCAAACTTAAGATTGGTGGCCTTCTTCGGTAACTAGGGGATAAGGGGCTTCGTCCTACACGATGCTCCTGTCGT	2	chrIV_452771_C_T;chrIV_452803_T_C	82;50	21	0	firstTileUTR	TRUE
firstTileUTR_01161	YDR001C_5UTR_0	YDR001C_5UTR	chrIV	452708	-	GGCGCGCCGATCGCGCAAGTTTCATATTGATAACCTTGTGAACCAGTCTATATATAGCCTTATATAAGTACTGCTCTATCAAACTTAAGATTGGTGGCCTTCCTCGGTAACTAGGGGATAAGGGGCTTCGTCCTACACGATGCTCCTGTCGT	2	chrIV_452771_C_T;chrIV_452803_T_C	82;50	12	0	firstTileUTR	TRUE
firstTileUTR_01162	YDR001C_5UTR_0	YDR001C_5UTR	chrIV	452708	-	GGCGCGCCGATCGCGCAAGTTTCATATTGATAACCTTGTGAACCAGTCTATATATAGCCTTATATAAGTATTGCTCTATCAAACTTAAGATTGGTGGCCTTCCTCGGTAACTAGGGGATAAGGGGCTTCGTCCTACACGATGCTCCTGTCGT	2	chrIV_452771_C_T;chrIV_452803_T_C	82;50	22	0	firstTileUTR	TRUE
firstTileUTR_01163	YDR002W_5UTR_0	YDR002W_5UTR	chrIV	453016	+	GGCGCGCCGCTTTTATTTCAAATTAAACAAGATCTTTCTTCTTTCTCCAATTGAATATCAATTTCATCATCAGATTTTAGTTTCTGTTTTATTTTTTATTTTTTTATTTTTTTTTTGTTTCTTGTTTTCCGCGTACTTCCCGCTGGGCGAAA	1	chrIV_452907_C_CAA	36	1	0	firstTileUTR	TRUE
firstTileUTR_01164	YDR002W_5UTR_0	YDR002W_5UTR	chrIV	453016	+	GGCGCGCCGCTTTTATTTCAAATTAAACAAGATCTTTCTTCTTTCTCCAATTGAATATCAATTTCATCATCAGATTTTAGTTTCTGTTTTATTTTTTATTTTTTTATTTTTTTTTTTTGTTTCTTGTTTTCCGCGTACTTCCCGCTGGGCGAAA	1	chrIV_452907_C_CAA	36	2	0	firstTileUTR	TRUE
firstTileUTR_01165	YDR005C_5UTR_0	YDR005C_5UTR	chrIV	458211	-	GGCGCGCCATATTTTTCGCATTGCTAAAGAAACACTGATACATAATGTGTCTACATTTTATATAGCTGATAGCACGTTCTTTTTAAGTTGAATTATCTTTTTTTTCTCTTGTTAAATAAGATGGACAACGCGCTTTCGCTGGCGAGATGAAG	1	chrIV_458282_C_A	74	1	0	firstTileUTR	TRUE
firstTileUTR_01166	YDR005C_5UTR_0	YDR005C_5UTR	chrIV	458211	-	GGCGCGCCATATTTTTCGCATTGCTAAAGAAACACTGATACATAATGTGTCTACATTTTATATAGCTGATAGCACGTTATTTTTAAGTTGAATTATCTTTTTTTTCTCTTGTTAAATAAGATGGACAACGCGCTTTCGCTGGCGAGATGAAG	1	chrIV_458282_C_A	74	2	0	firstTileUTR	TRUE
firstTileUTR_01167	YDR006C_5UTR_0	YDR006C_5UTR	chrIV	461398	-	GGCGCGCCGGAGATATTCCTTATGGCATGTCTGGCGATGATAAAACTTTTCAAACGGCAGCCCCGATCTAAAAGAGCTGACAGGGAAATGGTCAGAAAAAGAAACGTGCACCCGCCCGTCTGGACGCGCCGCTCACCCGCACGGCAGAGACC	2	chrIV_461425_C_T;chrIV_461469_G_C	118;74	11	0	firstTileUTR	FALSE
firstTileUTR_01168	YDR006C_5UTR_0	YDR006C_5UTR	chrIV	461398	-	GGCGCGCCGGAGATATTCCTTATGGCATGTCTGGTGATGATAAAACTTTTCAAACGGCAGCCCCGATCTAAAAGAGCTGACAGGGAAATGGTCAGAAAAAGAAACGTGCACCCGCCCGTCTGGACGCGCCGCTCACCCGCACGGCAGAGACC	2	chrIV_461425_C_T;chrIV_461469_G_C	118;74	21	0	firstTileUTR	FALSE
firstTileUTR_01169	YDR006C_5UTR_0	YDR006C_5UTR	chrIV	461398	-	GGCGCGCCGGAGATATTCCTTATGGCATGTCTGGCGATGATAAAACTTTTCAAACGGCAGCCCCGATCTAAAAGAGCTCACAGGGAAATGGTCAGAAAAAGAAACGTGCACCCGCCCGTCTGGACGCGCCGCTCACCCGCACGGCAGAGACC	2	chrIV_461425_C_T;chrIV_461469_G_C	118;74	12	0	firstTileUTR	FALSE
firstTileUTR_01170	YDR006C_5UTR_0	YDR006C_5UTR	chrIV	461398	-	GGCGCGCCGGAGATATTCCTTATGGCATGTCTGGTGATGATAAAACTTTTCAAACGGCAGCCCCGATCTAAAAGAGCTCACAGGGAAATGGTCAGAAAAAGAAACGTGCACCCGCCCGTCTGGACGCGCCGCTCACCCGCACGGCAGAGACC	2	chrIV_461425_C_T;chrIV_461469_G_C	118;74	22	0	firstTileUTR	FALSE
firstTileUTR_01171	YDR009W_5UTR_0	YDR009W_5UTR	chrIV	463363	+	GGCGCGCCGAATACCTGGGGTTGTCAATGTGGTAACAAAGGTGTTGCCTCACTTGTCGCTTATGATGATTATATACGTTTCAGTAAAAATTTTACTGCCTATGTGTTGCAGGCGGTCAATCAATTGCATAAAAGACCGTGTGATGGCTTGGC	2	chrIV_463263_C_A;chrIV_463276_G_A	45;58	11	0	firstTileUTR	TRUE
firstTileUTR_01172	YDR009W_5UTR_0	YDR009W_5UTR	chrIV	463363	+	GGCGCGCCGAATACCTGGGGTTGTCAATGTGGTAACAAAGGTGTTGCCTCACTTGTCGCTTATGATGATTATATACGTTTCAGTAAAAATTTTACTGCCTATGTGTTTCAGGCGGTCAATCAATTGCATAAAAGACCGTGTGATGGCTTGGC	2	chrIV_463263_C_A;chrIV_463276_G_A	45;58	21	0	firstTileUTR	TRUE
firstTileUTR_01173	YDR009W_5UTR_0	YDR009W_5UTR	chrIV	463363	+	GGCGCGCCGAATACCTGGGGTTGTCAATGTGGTAACAAAGGTGTTGCCTCACTTGTCGCTTATGATGATTATATACGTTTCAGTAAAAATTTTATTGCCTATGTGTTGCAGGCGGTCAATCAATTGCATAAAAGACCGTGTGATGGCTTGGC	2	chrIV_463263_C_A;chrIV_463276_G_A	45;58	12	0	firstTileUTR	TRUE
firstTileUTR_01174	YDR009W_5UTR_0	YDR009W_5UTR	chrIV	463363	+	GGCGCGCCGAATACCTGGGGTTGTCAATGTGGTAACAAAGGTGTTGCCTCACTTGTCGCTTATGATGATTATATACGTTTCAGTAAAAATTTTATTGCCTATGTGTTTCAGGCGGTCAATCAATTGCATAAAAGACCGTGTGATGGCTTGGC	2	chrIV_463263_C_A;chrIV_463276_G_A	45;58	22	0	firstTileUTR	TRUE
firstTileUTR_01175	YDR012W_5UTR_0	YDR012W_5UTR	chrIV	471821	+	GGCGCGCCGAATATGTAAGCGATTGCTGATAGGAAAGAAATATTATTTTCAATAATAATAGTAGTGTAACGTATTCATGATCTTCATGAAAACTTTTCCAGAGTACTTGAAAAAAAAAAAATGTTAAAAAAATTGCGTCTGCGCGATGCTTT	1	chrIV_471707_AT_A	31	1	0	firstTileUTR	FALSE
firstTileUTR_01176	YDR012W_5UTR_0	YDR012W_5UTR	chrIV	471821	+	GGCGCGCCGAATATGTAAGCGATTGCTGATAGGAAAGAAATATTATTTTCAATAATAATAGTAGTGTAACGTATTCATGATCTTCATGAAAACTTTTCCAGAGTACTTGAAAAAAAAAAATGTTAAAAAAATTGCGTCTGCGCGATGCTTT	1	chrIV_471707_AT_A	31	2	0	firstTileUTR	FALSE
firstTileUTR_01177	YDR018C_5UTR_0	YDR018C_5UTR	chrIV	483889	-	GGCGCGCCGTAGGGTTGTTTGTTCATTTCTTTAACCTTCGACGGACAGATCTGGGGTACGTTCTAATAAAAGTAACCGCGCAGCCTATCTCCACGCGAAGGGGTAAAAGATCAAACAAGTCCTTAAGAATATACAAAAAGCTACATAAATAT	1	chrIV_484028_A_G	6	1	0	firstTileUTR	FALSE
firstTileUTR_01178	YDR018C_5UTR_0	YDR018C_5UTR	chrIV	483889	-	GGCGCGCCGTAGGGTTGTTTGTTCATTTCTTTAACCTTCGACGGACAGATCTGGGGTACGTTCTAATAAAAGTAACCGCGCAGCCTATCTCCACGCGAAGGGGTAAAAGATCAAACAAGTCCTTAAGAATATACAAAAAGCTACATGAATAT	1	chrIV_484028_A_G	6	2	0	firstTileUTR	FALSE
firstTileUTR_01179	YDR019C_5UTR_0	YDR019C_5UTR	chrIV	485369	-	GGCGCGCCGCTTGTGCCAGGCAAAGCTCTTTCTACATATGTGAGCTACGGGTACTGTAATTGGATTTGTTTGGGTTCAAGGTGCTATATATATGATATTTGGACCTATTCTTTTTGACATACCGTTTACTCGAGGCAACACGAGTCAGGGCT	1	chrIV_485454_T_C	60	1	0	firstTileUTR	TRUE
firstTileUTR_01180	YDR019C_5UTR_0	YDR019C_5UTR	chrIV	485369	-	GGCGCGCCGCTTGTGCCAGGCAAAGCTCTTTCTACATATGTGAGCTACGGGTACTGTAATTGGATTTGTTTGGGTTCAAGGTGCTATATATACGATATTTGGACCTATTCTTTTTGACATACCGTTTACTCGAGGCAACACGAGTCAGGGCT	1	chrIV_485454_T_C	60	2	0	firstTileUTR	TRUE
firstTileUTR_01181	YDR023W_5UTR_0	YDR023W_5UTR	chrIV	489486	+	GGCGCGCCGTGCCAGTTCACGAATTGTAATATATATATATATATATATATATTACATTGCGATCTTATCAACTTATTTTCTGCTATTTTTCAAATTTCATTGAGTTGATTCGAAGAAATGACAAAAAAATTTTTTTTTGCACCACGTGATTT	1	chrIV_489441_AATATATATATAT_AATATATAT	100	1	0	firstTileUTR	TRUE
firstTileUTR_01182	YDR023W_5UTR_0	YDR023W_5UTR	chrIV	489486	+	GGCGCGCCGTGCCAGTTCACGAATTGTAATATATATATATATATATATTACATTGCGATCTTATCAACTTATTTTCTGCTATTTTTCAAATTTCATTGAGTTGATTCGAAGAAATGACAAAAAAATTTTTTTTTGCACCACGTGATTT	1	chrIV_489441_AATATATATATAT_AATATATAT	100	2	0	firstTileUTR	TRUE
firstTileUTR_01183	YDR034C_5UTR_0	YDR034C_5UTR	chrIV	512237	-	GGCGCGCCGGGCTTTTCTTATTCGCCTAGACTGAAGTGATGCAGAACAATAAGCATTCTAATCGGCCTATGGTTATGATTTTGAAATTCCTGAGGAAATTTTTCCACTGTCATTTCTTCCAATTGAGTCACGTCGCGTCCTCGTAGGCAATG	1	chrIV_512368_C_A	14	1	0	firstTileUTR	TRUE
firstTileUTR_01184	YDR034C_5UTR_0	YDR034C_5UTR	chrIV	512237	-	GGCGCGCCGGGCTTTTCTTATTCGCCTAGACTGAAGTGATGCAGAACAATAAGCATTCTAATCGGCCTATGGTTATGATTTTGAAATTCCTGAGGAAATTTTTCCACTGTCATTTCTTCCAATTGAGTCACGTCGCGTACTCGTAGGCAATG	1	chrIV_512368_C_A	14	2	0	firstTileUTR	TRUE
firstTileUTR_01185	YDR035W_5UTR_0	YDR035W_5UTR	chrIV	521787	+	GGCGCGCCAGGGGTAGTAGCTATAAATATAAATGAGAAATAGTGAAAATAAATATGTCGTTCGTATACAAGTAACAGGAAGAAAAAAAAGAAGAGAGAGAAAATGCAAACACTTATAAACACATGCATGTATTTAATGCAGCAAGCATACTT	2	chrIV_521753_C_T;chrIV_521776_C_G	111;134	11	0	firstTileUTR	FALSE
firstTileUTR_01186	YDR035W_5UTR_0	YDR035W_5UTR	chrIV	521787	+	GGCGCGCCAGGGGTAGTAGCTATAAATATAAATGAGAAATAATGAAAATAAATATGTCGTTCGTATACAAGTAACAGGAAGAAAAAAAAGAAGAGAGAGAAAATGCAAACACTTATAAACACATGCATGTATTTAATGCAGCAAGCATACTT	2	chrIV_521753_C_T;chrIV_521776_C_G	111;134	21	0	firstTileUTR	FALSE
firstTileUTR_01187	YDR035W_5UTR_0	YDR035W_5UTR	chrIV	521787	+	GGCGCGCCAGGGGTAGTACCTATAAATATAAATGAGAAATAGTGAAAATAAATATGTCGTTCGTATACAAGTAACAGGAAGAAAAAAAAGAAGAGAGAGAAAATGCAAACACTTATAAACACATGCATGTATTTAATGCAGCAAGCATACTT	2	chrIV_521753_C_T;chrIV_521776_C_G	111;134	12	0	firstTileUTR	FALSE
firstTileUTR_01188	YDR035W_5UTR_0	YDR035W_5UTR	chrIV	521787	+	GGCGCGCCAGGGGTAGTACCTATAAATATAAATGAGAAATAATGAAAATAAATATGTCGTTCGTATACAAGTAACAGGAAGAAAAAAAAGAAGAGAGAGAAAATGCAAACACTTATAAACACATGCATGTATTTAATGCAGCAAGCATACTT	2	chrIV_521753_C_T;chrIV_521776_C_G	111;134	22	0	firstTileUTR	FALSE
firstTileUTR_01189	YDR036C_5UTR_0	YDR036C_5UTR	chrIV	524723	-	GGCGCGCCGGCTAAACAGAACCAAGTATTATATAAATGAGGATTCCCGTACACAGGCGCAGGAAACAAGCTGCTCTTATCTTCTCGGCTACCTCATCAATCATTTGGCTCCGAGGTTTAACACTTTTCTTTGCACTTGCCTCTCCAATTCCG	1	chrIV_524808_T_C	60	1	0	firstTileUTR	TRUE
firstTileUTR_01190	YDR036C_5UTR_0	YDR036C_5UTR	chrIV	524723	-	GGCGCGCCGGCTAAACAGAACCAAGTATTATATAAATGAGGATTCCCGTACACAGGCGCAGGAAACAAGCTGCTCTTATCTTCTCGGCTACCCCATCAATCATTTGGCTCCGAGGTTTAACACTTTTCTTTGCACTTGCCTCTCCAATTCCG	1	chrIV_524808_T_C	60	2	0	firstTileUTR	TRUE
firstTileUTR_01191	YDR037W_5UTR_0	YDR037W_5UTR	chrIV	525419	+	GGCGCGCCGGATTTCTCGGAGGAAGGACAGAGCAATAAATCAATGTATGTAAGATAATTATACTTTTCTTTCTAAACAAAAAAGTGGCTGTATATATAACTTCGAAGTTCATTAAGAGTCATTTCATCATTCATCGATAATTCAAGCTAAAA	1	chrIV_525412_G_A	138	1	0	firstTileUTR	FALSE
firstTileUTR_01192	YDR037W_5UTR_0	YDR037W_5UTR	chrIV	525419	+	GGCGCGCCGGATTTTTCGGAGGAAGGACAGAGCAATAAATCAATGTATGTAAGATAATTATACTTTTCTTTCTAAACAAAAAAGTGGCTGTATATATAACTTCGAAGTTCATTAAGAGTCATTTCATCATTCATCGATAATTCAAGCTAAAA	1	chrIV_525412_G_A	138	2	0	firstTileUTR	FALSE
firstTileUTR_01193	YDR041W_5UTR_0	YDR041W_5UTR	chrIV	539795	+	GGCGCGCCGTTTTTCCCCCTTTTCTGATTTTGCACGGTTCGCATAATTCTAATTTGTACCAAATAGTTTCATTTCATGCCCTTTCTTGCATTTTTTCCTTTTCAAAAGAAAATAGATGTACAGGTATTACCCGCCTGGTACATAGTTTGCTA	1	chrIV_539688_C_T	38	1	0	firstTileUTR	TRUE
firstTileUTR_01194	YDR041W_5UTR_0	YDR041W_5UTR	chrIV	539795	+	GGCGCGCCGTTTTTCCCCCTTTTCTGATTTTGCACGGTTCGCATAATTCTAATTTGTACCAAATAGTTTCATTTCATGCCCTTTCTTGCATTTTTTCCTTTTCAAAAGAAAATAAATGTACAGGTATTACCCGCCTGGTACATAGTTTGCTA	1	chrIV_539688_C_T	38	2	0	firstTileUTR	TRUE
firstTileUTR_01195	YDR042C_5UTR_0	YDR042C_5UTR	chrIV	541261	-	GGCGCGCCGATTCGCTATTTTCAATAGTAAAGTTTCTAATAAAATGACAAACATGAAGAAGATATAAGTGCGTGTTCTTCCAATATATAATATTTGTACTGCAGATACACAGATTCAAATTTTTCCCTGTTATCCGCCTTTCTTCTTGGAAA	2	chrIV_541267_G_A;chrIV_541275_C_T	139;131	11	0	firstTileUTR	TRUE
firstTileUTR_01196	YDR042C_5UTR_0	YDR042C_5UTR	chrIV	541261	-	GGCGCGCCGATTCACTATTTTCAATAGTAAAGTTTCTAATAAAATGACAAACATGAAGAAGATATAAGTGCGTGTTCTTCCAATATATAATATTTGTACTGCAGATACACAGATTCAAATTTTTCCCTGTTATCCGCCTTTCTTCTTGGAAA	2	chrIV_541267_G_A;chrIV_541275_C_T	139;131	21	0	firstTileUTR	TRUE
firstTileUTR_01197	YDR042C_5UTR_0	YDR042C_5UTR	chrIV	541261	-	GGCGCGCCGATTCGCTATTTTTAATAGTAAAGTTTCTAATAAAATGACAAACATGAAGAAGATATAAGTGCGTGTTCTTCCAATATATAATATTTGTACTGCAGATACACAGATTCAAATTTTTCCCTGTTATCCGCCTTTCTTCTTGGAAA	2	chrIV_541267_G_A;chrIV_541275_C_T	139;131	12	0	firstTileUTR	TRUE
firstTileUTR_01198	YDR042C_5UTR_0	YDR042C_5UTR	chrIV	541261	-	GGCGCGCCGATTCACTATTTTTAATAGTAAAGTTTCTAATAAAATGACAAACATGAAGAAGATATAAGTGCGTGTTCTTCCAATATATAATATTTGTACTGCAGATACACAGATTCAAATTTTTCCCTGTTATCCGCCTTTCTTCTTGGAAA	2	chrIV_541267_G_A;chrIV_541275_C_T	139;131	22	0	firstTileUTR	TRUE
firstTileUTR_01199	YDR044W_5UTR_0	YDR044W_5UTR	chrIV	546599	+	GGCGCGCCGTTTGATTTGCGAAAAGAAAGCTTTTGATATGCTCAAAAAAAGAAAACCCGGAGAATAAAAGCTTAACAAAGAAAGACAATAGGTGGAAAAAAAAAGGAAAATCCGTGTCCTTATATAGCCTTTCGAAACGAGAACAATGGGCA	2	chrIV_546551_G_GT;chrIV_546556_C_T	97;102	11	0	firstTileUTR	FALSE
firstTileUTR_01200	YDR044W_5UTR_0	YDR044W_5UTR	chrIV	546599	+	GGCGCGCCGTTTGATTTGCGAAAAGAAAGCTTTTGATATGCTCAAAAAAAGAAAAACCCGGAGAATAAAAGCTTAACAAAGAAAGACAATAGGTGGAAAAAAAAAGGAAAATCCGTGTCCTTATATAGCCTTTCGAAACGAGAACAATGGGCA	2	chrIV_546551_G_GT;chrIV_546556_C_T	97;102	21	0	firstTileUTR	FALSE
firstTileUTR_01201	YDR044W_5UTR_0	YDR044W_5UTR	chrIV	546599	+	GGCGCGCCGTTTGATTTGCGAAAAGAAAGCTTTTGATATGCTCAAAAAAAAAAAACCCGGAGAATAAAAGCTTAACAAAGAAAGACAATAGGTGGAAAAAAAAAGGAAAATCCGTGTCCTTATATAGCCTTTCGAAACGAGAACAATGGGCA	2	chrIV_546551_G_GT;chrIV_546556_C_T	97;102	12	0	firstTileUTR	FALSE
firstTileUTR_01202	YDR044W_5UTR_0	YDR044W_5UTR	chrIV	546599	+	GGCGCGCCGTTTGATTTGCGAAAAGAAAGCTTTTGATATGCTCAAAAAAAAAAAAACCCGGAGAATAAAAGCTTAACAAAGAAAGACAATAGGTGGAAAAAAAAAGGAAAATCCGTGTCCTTATATAGCCTTTCGAAACGAGAACAATGGGCA	2	chrIV_546551_G_GT;chrIV_546556_C_T	97;102	22	0	firstTileUTR	FALSE
firstTileUTR_01203	YDR045C_5UTR_0	YDR045C_5UTR	chrIV	548465	-	GGCGCGCCGATCATCTTGCCATGTAATAATAGATGTCCAAAAATTTCATCTGCCATTTTTTTATTTTCCCGTTCGTTCACTTGCTCTAGTTTTTTTTTTTTTTTTTTTCAATACTCGGATTTGAAAATGTTAATGGGAGTGGCGCTAAAAAC	1	chrIV_548546_GT_GTT	64	1	0	firstTileUTR	TRUE
firstTileUTR_01204	YDR045C_5UTR_0	YDR045C_5UTR	chrIV	548465	-	GGCGCGCCGATCATCTTGCCATGTAATAATAGATGTCCAAAAATTTCATCTGCCATTTTTTTATTTTCCCGTTCGTTCACTTGCTCTAGTTTTTTTTTTTTTTTTTTTTCAATACTCGGATTTGAAAATGTTAATGGGAGTGGCGCTAAAAAC	1	chrIV_548546_GT_GTT	64	2	0	firstTileUTR	TRUE
firstTileUTR_01205	YDR054C_5UTR_0	YDR054C_5UTR	chrIV	562516	-	GGCGCGCCAAGTTTCTGCTCTTGTTCTTTACAGATTCAAGAGGAAACCAAAAAAAAATCAAAGAAAAAGAATCGAATTTTTCCCAAAATGAAAGTGTAAGGAAAAAAAAAGAGGAGATAGAAAATCCGAAGAACCCCAAGGGACGGACAAAC	1	chrIV_562609_GA_G	52	1	0	firstTileUTR	FALSE
firstTileUTR_01206	YDR054C_5UTR_0	YDR054C_5UTR	chrIV	562516	-	GGCGCGCCAAGTTTCTGCTCTTGTTCTTTACAGATTCAAGAGGAAACCAAAAAAAAATCAAAGAAAAAGAATCGAATTTTTCCCAAAATGAAAGTGTAAGGAAAAAAAAGAGGAGATAGAAAATCCGAAGAACCCCAAGGGACGGACAAAC	1	chrIV_562609_GA_G	52	2	0	firstTileUTR	FALSE
firstTileUTR_01207	YDR058C_5UTR_0	YDR058C_5UTR	chrIV	568736	-	GGCGCGCCGCTTTATTCTCTATATTCTTCCTTGTACATATTTTCAATAGCGGTTCATATTAGGCTCATTATGAGAAAAGGTTGGTGAGAAATTTAGCATATTTTAAACAATCATTTAGCTAGATGAATCAGAATGTTTTTCCGACAAATAGT	3	chrIV_568816_G_A;chrIV_568863_G_A;chrIV_568871_G_A	65;18;10	111	0	firstTileUTR	TRUE
firstTileUTR_01208	YDR058C_5UTR_0	YDR058C_5UTR	chrIV	568736	-	GGCGCGCCGCTTTATTCTCTATATTCTTCCTTGTACATATTTTCAATAGCGGTTCATATTAGGCTCATTATGAGAAAAGGTTGGTGAAAAATTTAGCATATTTTAAACAATCATTTAGCTAGATGAATCAGAATGTTTTTCCGACAAATAGT	3	chrIV_568816_G_A;chrIV_568863_G_A;chrIV_568871_G_A	65;18;10	211	0	firstTileUTR	TRUE
firstTileUTR_01209	YDR058C_5UTR_0	YDR058C_5UTR	chrIV	568736	-	GGCGCGCCGCTTTATTCTCTATATTCTTCCTTGTACATATTTTCAATAGCGGTTCATATTAGGCTCATTATGAGAAAAGGTTGGTGAGAAATTTAGCATATTTTAAACAATCATTTAGCTAGATGAATCAGAATATTTTTCCGACAAATAGT	3	chrIV_568816_G_A;chrIV_568863_G_A;chrIV_568871_G_A	65;18;10	121	0	firstTileUTR	TRUE
firstTileUTR_01210	YDR058C_5UTR_0	YDR058C_5UTR	chrIV	568736	-	GGCGCGCCGCTTTATTCTCTATATTCTTCCTTGTACATATTTTCAATAGCGGTTCATATTAGGCTCATTATGAGAAAAGGTTGGTGAGAAATTTAGCATATTTTAAACAATCATTTAGCTAGATGAATCAGAATGTTTTTCCAACAAATAGT	3	chrIV_568816_G_A;chrIV_568863_G_A;chrIV_568871_G_A	65;18;10	112	0	firstTileUTR	TRUE
firstTileUTR_01211	YDR058C_5UTR_0	YDR058C_5UTR	chrIV	568736	-	GGCGCGCCGCTTTATTCTCTATATTCTTCCTTGTACATATTTTCAATAGCGGTTCATATTAGGCTCATTATGAGAAAAGGTTGGTGAAAAATTTAGCATATTTTAAACAATCATTTAGCTAGATGAATCAGAATATTTTTCCAACAAATAGT	3	chrIV_568816_G_A;chrIV_568863_G_A;chrIV_568871_G_A	65;18;10	222	0	firstTileUTR	TRUE
firstTileUTR_01212	YDR060W_5UTR_0	YDR060W_5UTR	chrIV	570608	+	GGCGCGCCAATATCTATAGAAATTTATCAAACTATAGAATTTCGCTTCCGATGTGTACGACATAATGCTTTCTTATTCGCAACTCCATTACTTTGGCATCTCTGATAATTTTTTACCTCATCGCCAAAAGAAAAAATTTTTCATTCTGCAAC	1	chrIV_570480_T_A	17	1	0	firstTileUTR	TRUE
firstTileUTR_01213	YDR060W_5UTR_0	YDR060W_5UTR	chrIV	570608	+	GGCGCGCCAATATCTATAGAAATTTATCAAACTATAGAATTTCGCTTCCGATGTGTACGACATAATGCTTTCTTATTCGCAACTCCATTACTTTGGCATCTCTGATAATTTTTTACCTCATCGCCAAAAGAAAAATTTTTTCATTCTGCAAC	1	chrIV_570480_T_A	17	2	0	firstTileUTR	TRUE
firstTileUTR_01214	YDR061W_5UTR_0	YDR061W_5UTR	chrIV	574109	+	GGCGCGCCACTGCAATTAGCTAACAGAAAATTGTCGCTACAAATGTGCCTATATAAACAAAATGGTTAAAAATGAGTTCTGGATTATTTATTTCTAATAGGAGTCACGTGGTTCCATCGTTTTTAGTTTCGTCTCACGATGTCAGCAATCTC	1	chrIV_574093_G_A	129	1	0	firstTileUTR	TRUE
firstTileUTR_01215	YDR061W_5UTR_0	YDR061W_5UTR	chrIV	574109	+	GGCGCGCCACTGCAATTAGCTAATAGAAAATTGTCGCTACAAATGTGCCTATATAAACAAAATGGTTAAAAATGAGTTCTGGATTATTTATTTCTAATAGGAGTCACGTGGTTCCATCGTTTTTAGTTTCGTCTCACGATGTCAGCAATCTC	1	chrIV_574093_G_A	129	2	0	firstTileUTR	TRUE
firstTileUTR_01216	YDR063W_5UTR_0	YDR063W_5UTR	chrIV	578595	+	GGCGCGCCGATAAATTCAAAATCAGTGAACAAAAGAATTGATAATCCATTTAAAGTTTAACAGACCCTGATCCTAATTCGCTTTTGTCTAACAAAATCACCTAGGGGGTTGGCGTTGACATGTTCTTCTTTTGTCCGCGAAAAAAAAAAACT	4	chrIV_578452_GTT_GT;chrIV_578506_A_G;chrIV_578512_T_C;chrIV_578566_T_A	2;56;62;116	1111	0	firstTileUTR	FALSE
firstTileUTR_01217	YDR063W_5UTR_0	YDR063W_5UTR	chrIV	578595	+	GGCGCGCCGATAAATTCAAAATCAGTGAACAAAAGAATTGATAATCCATTTAAAGTTTAACAGACCCTGATCCTAATTCGCTTTTGTCTAACAAAATCACCTAGGGGGTTGGCGTTGACATGTTCTTCTTTTGTCCGCGAAAAAAAAAACT	4	chrIV_578452_GTT_GT;chrIV_578506_A_G;chrIV_578512_T_C;chrIV_578566_T_A	2;56;62;116	2111	0	firstTileUTR	FALSE
firstTileUTR_01218	YDR063W_5UTR_0	YDR063W_5UTR	chrIV	578595	+	GGCGCGCCGATAAATTCAAAATCAGTGAACAAAAGAATTGATAATCCATTTAAAGTTTAACAGACCCTGATCCTAATTCGCTTTTGTCTAACAAAACCACCTAGGGGGTTGGCGTTGACATGTTCTTCTTTTGTCCGCGAAAAAAAAAAACT	4	chrIV_578452_GTT_GT;chrIV_578506_A_G;chrIV_578512_T_C;chrIV_578566_T_A	2;56;62;116	1211	0	firstTileUTR	FALSE
firstTileUTR_01219	YDR063W_5UTR_0	YDR063W_5UTR	chrIV	578595	+	GGCGCGCCGATAAATTCAAAATCAGTGAACAAAAGAATTGATAATCCATTTAAAGTTTAACAGACCCTGATCCTAATTCGCTTTTGTCTAGCAAAATCACCTAGGGGGTTGGCGTTGACATGTTCTTCTTTTGTCCGCGAAAAAAAAAAACT	4	chrIV_578452_GTT_GT;chrIV_578506_A_G;chrIV_578512_T_C;chrIV_578566_T_A	2;56;62;116	1121	0	firstTileUTR	FALSE
firstTileUTR_01220	YDR063W_5UTR_0	YDR063W_5UTR	chrIV	578595	+	GGCGCGCCGATAAATTCAAAATCAGTGAACAAAAGATTTGATAATCCATTTAAAGTTTAACAGACCCTGATCCTAATTCGCTTTTGTCTAACAAAATCACCTAGGGGGTTGGCGTTGACATGTTCTTCTTTTGTCCGCGAAAAAAAAAAACT	4	chrIV_578452_GTT_GT;chrIV_578506_A_G;chrIV_578512_T_C;chrIV_578566_T_A	2;56;62;116	1112	0	firstTileUTR	FALSE
firstTileUTR_01221	YDR063W_5UTR_0	YDR063W_5UTR	chrIV	578595	+	GGCGCGCCGATAAATTCAAAATCAGTGAACAAAAGATTTGATAATCCATTTAAAGTTTAACAGACCCTGATCCTAATTCGCTTTTGTCTAGCAAAACCACCTAGGGGGTTGGCGTTGACATGTTCTTCTTTTGTCCGCGAAAAAAAAAACT	4	chrIV_578452_GTT_GT;chrIV_578506_A_G;chrIV_578512_T_C;chrIV_578566_T_A	2;56;62;116	2222	0	firstTileUTR	FALSE
firstTileUTR_01222	YDR066C_5UTR_0	YDR066C_5UTR	chrIV	582587	-	GGCGCGCCGCTGTTGATAAATGGCTTCCAATCTTCGCCAATACTAGAATGTGACCGGCTCGTCTCTTTTGTAAAGTCGATGTAATTTTCGTTGGACTTTTCAATGGCATTTGATATTGAAAAAAATGATTATCAATGCTGGAGGGCCCGGCT	1	chrIV_582694_AT_A	38	1	0	firstTileUTR	TRUE
firstTileUTR_01223	YDR066C_5UTR_0	YDR066C_5UTR	chrIV	582587	-	GGCGCGCCGCTGTTGATAAATGGCTTCCAATCTTCGCCAATACTAGAATGTGACCGGCTCGTCTCTTTTGTAAAGTCGATGTAATTTTCGTTGGACTTTTCAATGGCATTTGATATGAAAAAAATGATTATCAATGCTGGAGGGCCCGGCT	1	chrIV_582694_AT_A	38	2	0	firstTileUTR	TRUE
firstTileUTR_01224	YDR070C_5UTR_0	YDR070C_5UTR	chrIV	588439	-	GGCGCGCCGGAGTATTGTAGGAACAAGTATTCAAGGCCAAAAAAAACTAAGAGCCAACTCAAAGGCCATATCTACCTAATCAAATCTTGGGACCTTTATATACTTATGTGCTTTTACGGTTCCCTTAGATTCTGTACAGGAAGAAGGGGTTG	3	chrIV_588465_A_G;chrIV_588509_A_G;chrIV_588560_A_G	119;75;24	111	0	firstTileUTR	FALSE
firstTileUTR_01225	YDR070C_5UTR_0	YDR070C_5UTR	chrIV	588439	-	GGCGCGCCGGAGTATTGTAGGAACAAGTATTCAGGGCCAAAAAAAACTAAGAGCCAACTCAAAGGCCATATCTACCTAATCAAATCTTGGGACCTTTATATACTTATGTGCTTTTACGGTTCCCTTAGATTCTGTACAGGAAGAAGGGGTTG	3	chrIV_588465_A_G;chrIV_588509_A_G;chrIV_588560_A_G	119;75;24	211	0	firstTileUTR	FALSE
firstTileUTR_01226	YDR070C_5UTR_0	YDR070C_5UTR	chrIV	588439	-	GGCGCGCCGGAGTATTGTAGGAACAAGTATTCAAGGCCAAAAAAAACTAAGAGCCAACTCAAAGGCCATATCTACCTGATCAAATCTTGGGACCTTTATATACTTATGTGCTTTTACGGTTCCCTTAGATTCTGTACAGGAAGAAGGGGTTG	3	chrIV_588465_A_G;chrIV_588509_A_G;chrIV_588560_A_G	119;75;24	121	0	firstTileUTR	FALSE
firstTileUTR_01227	YDR070C_5UTR_0	YDR070C_5UTR	chrIV	588439	-	GGCGCGCCGGAGTATTGTAGGAACAAGTATTCAAGGCCAAAAAAAACTAAGAGCCAACTCAAAGGCCATATCTACCTAATCAAATCTTGGGACCTTTATATACTTATGTGCTTTTACGGTTCCCTTAGGTTCTGTACAGGAAGAAGGGGTTG	3	chrIV_588465_A_G;chrIV_588509_A_G;chrIV_588560_A_G	119;75;24	112	0	firstTileUTR	FALSE
firstTileUTR_01228	YDR070C_5UTR_0	YDR070C_5UTR	chrIV	588439	-	GGCGCGCCGGAGTATTGTAGGAACAAGTATTCAGGGCCAAAAAAAACTAAGAGCCAACTCAAAGGCCATATCTACCTGATCAAATCTTGGGACCTTTATATACTTATGTGCTTTTACGGTTCCCTTAGGTTCTGTACAGGAAGAAGGGGTTG	3	chrIV_588465_A_G;chrIV_588509_A_G;chrIV_588560_A_G	119;75;24	222	0	firstTileUTR	FALSE
firstTileUTR_01229	YDR073W_5UTR_0	YDR073W_5UTR	chrIV	592355	+	GGCGCGCCGAATAGAGGGTATCATAAACGGCAATCTTACTACGACCCCACGTAATATGCTTTTATGGGAAGTCTGTTCTCCACTCCGTATATACTGTTAGGAGAAAAAAGGAAAAAAAATTTGCCCGAAAGTCGATTGTTACCCGGCAAAAC	2	chrIV_592224_A_G;chrIV_592352_T_G	14;142	11	0	firstTileUTR	FALSE
firstTileUTR_01230	YDR073W_5UTR_0	YDR073W_5UTR	chrIV	592355	+	GGCGCGCCGAATAGAGGGTATCATAAACGGCAATCTTACTACGACCCCACGTAATATGCTTTTATGGGAAGTCTGTTCTCCACTCCGTATATACTGTTAGGAGAAAAAAGGAAAAAAAATTTGCCCGAAAGTCGATTGCTACCCGGCAAAAC	2	chrIV_592224_A_G;chrIV_592352_T_G	14;142	21	0	firstTileUTR	FALSE
firstTileUTR_01231	YDR073W_5UTR_0	YDR073W_5UTR	chrIV	592355	+	GGCGCGCCGACTAGAGGGTATCATAAACGGCAATCTTACTACGACCCCACGTAATATGCTTTTATGGGAAGTCTGTTCTCCACTCCGTATATACTGTTAGGAGAAAAAAGGAAAAAAAATTTGCCCGAAAGTCGATTGTTACCCGGCAAAAC	2	chrIV_592224_A_G;chrIV_592352_T_G	14;142	12	0	firstTileUTR	FALSE
firstTileUTR_01232	YDR073W_5UTR_0	YDR073W_5UTR	chrIV	592355	+	GGCGCGCCGACTAGAGGGTATCATAAACGGCAATCTTACTACGACCCCACGTAATATGCTTTTATGGGAAGTCTGTTCTCCACTCCGTATATACTGTTAGGAGAAAAAAGGAAAAAAAATTTGCCCGAAAGTCGATTGCTACCCGGCAAAAC	2	chrIV_592224_A_G;chrIV_592352_T_G	14;142	22	0	firstTileUTR	FALSE
firstTileUTR_01233	YDR074W_5UTR_0	YDR074W_5UTR	chrIV	593783	+	GGCGCGCCAGATTAGACTGAAAAAGATGAAGGAAAAGCTGACTGAAAGATCTCCGAAAGTACACGGAAATTGATAGTATTTAAATGAATCAGCTGAGACTTCCAGGGATGTCCGAAAATGGGGGGTTAAAGGCGTATTGTCCCAAAGAAAAT	3	chrIV_593642_T_C;chrIV_593676_T_C;chrIV_593751_C_T	4;38;113	111	0	firstTileUTR	FALSE
firstTileUTR_01234	YDR074W_5UTR_0	YDR074W_5UTR	chrIV	593783	+	GGCGCGCCAGATTAGACTGAAAAAGATGAAGGAAAAGCTGACTGAAAGATCTCCGAAAGTACACGGAAATTGATAGTATTTAAATGAATCAGCTGAGACTTCCAGGGATGTCCGAAAATGGGGGGTTAAAGGCGTATTGTCCCAAAGAGAAT	3	chrIV_593642_T_C;chrIV_593676_T_C;chrIV_593751_C_T	4;38;113	211	0	firstTileUTR	FALSE
firstTileUTR_01235	YDR074W_5UTR_0	YDR074W_5UTR	chrIV	593783	+	GGCGCGCCAGATTAGACTGAAAAAGATGAAGGAAAAGCTGACTGAAAGATCTCCGAAAGTACACGGAAATTGATAGTATTTAAATGAATCAGCTGAGACTTCCAGGGATGTCCGGAAATGGGGGGTTAAAGGCGTATTGTCCCAAAGAAAAT	3	chrIV_593642_T_C;chrIV_593676_T_C;chrIV_593751_C_T	4;38;113	121	0	firstTileUTR	FALSE
firstTileUTR_01236	YDR074W_5UTR_0	YDR074W_5UTR	chrIV	593783	+	GGCGCGCCAGATTAGACTGAAAAAGATGAAGGAAAAGCTAACTGAAAGATCTCCGAAAGTACACGGAAATTGATAGTATTTAAATGAATCAGCTGAGACTTCCAGGGATGTCCGAAAATGGGGGGTTAAAGGCGTATTGTCCCAAAGAAAAT	3	chrIV_593642_T_C;chrIV_593676_T_C;chrIV_593751_C_T	4;38;113	112	0	firstTileUTR	FALSE
firstTileUTR_01237	YDR074W_5UTR_0	YDR074W_5UTR	chrIV	593783	+	GGCGCGCCAGATTAGACTGAAAAAGATGAAGGAAAAGCTAACTGAAAGATCTCCGAAAGTACACGGAAATTGATAGTATTTAAATGAATCAGCTGAGACTTCCAGGGATGTCCGGAAATGGGGGGTTAAAGGCGTATTGTCCCAAAGAGAAT	3	chrIV_593642_T_C;chrIV_593676_T_C;chrIV_593751_C_T	4;38;113	222	0	firstTileUTR	FALSE
firstTileUTR_01238	YDR075W_5UTR_0	YDR075W_5UTR	chrIV	596982	+	GGCGCGCCGCTCTTTTCGAGATGCCGTTCTTCTCCTCAGTTCACATGATAAAGATACTTTTTTTCAATTAATTCATCGATTTTTTTTCTTCCCGCCGGACATTGTATTAAATTTCTTTTTCTCATTAATAAAACAAAGAACAATGATATTTA	1	chrIV_596843_A_T	6	1	0	firstTileUTR	TRUE
firstTileUTR_01239	YDR075W_5UTR_0	YDR075W_5UTR	chrIV	596982	+	GGCGCGCCGCTCTTTTCGAGATGCCGTTCTTCTCCTCAGTTCACATGATAAAGATACTTTTTTTCAATTAATTCATCGATTTTTTTTCTTCCCGCCGGACATTGTATTAAATTTCTTTTTCTCATTAATAAAACAAAGAACAATGAAATTTA	1	chrIV_596843_A_T	6	2	0	firstTileUTR	TRUE
firstTileUTR_01240	YDR077W_5UTR_0	YDR077W_5UTR	chrIV	600762	+	GGCGCGCCGTCTTTGTAGTTACGACTATAAATCAATAATTACAAGAGAATAGAAAAAGAGAGGTGAGATAATACGATAATGGAGAATAAAATAGGTCAGGTATTTATATGACAGTTCAAAAGAGGGCAGAGCAATGTTCCTTACTCTAGTTC	2	chrIV_600707_C_T;chrIV_600712_C_T	90;95	11	0	firstTileUTR	FALSE
firstTileUTR_01241	YDR077W_5UTR_0	YDR077W_5UTR	chrIV	600762	+	GGCGCGCCGTCTTTGTAGTTACGACTATAAATCAATAATTACAAGAGAATAGAAAAAGAGAGATGAGATAATACGATAATGGAGAATAAAATAGGTCAGGTATTTATATGACAGTTCAAAAGAGGGCAGAGCAATGTTCCTTACTCTAGTTC	2	chrIV_600707_C_T;chrIV_600712_C_T	90;95	21	0	firstTileUTR	FALSE
firstTileUTR_01242	YDR077W_5UTR_0	YDR077W_5UTR	chrIV	600762	+	GGCGCGCCGTCTTTGTAGTTACGACTATAAATCAATAATTACAAGAGAATAGAAAAAAAGAGGTGAGATAATACGATAATGGAGAATAAAATAGGTCAGGTATTTATATGACAGTTCAAAAGAGGGCAGAGCAATGTTCCTTACTCTAGTTC	2	chrIV_600707_C_T;chrIV_600712_C_T	90;95	12	0	firstTileUTR	FALSE
firstTileUTR_01243	YDR077W_5UTR_0	YDR077W_5UTR	chrIV	600762	+	GGCGCGCCGTCTTTGTAGTTACGACTATAAATCAATAATTACAAGAGAATAGAAAAAAAGAGATGAGATAATACGATAATGGAGAATAAAATAGGTCAGGTATTTATATGACAGTTCAAAAGAGGGCAGAGCAATGTTCCTTACTCTAGTTC	2	chrIV_600707_C_T;chrIV_600712_C_T	90;95	22	0	firstTileUTR	FALSE
firstTileUTR_01244	YDR078C_5UTR_0	YDR078C_5UTR	chrIV	602886	-	GGCGCGCCGTTCTTTTCTCCCTATTTCTTCTTCATCACCAACACTTTTGCTTTACCGGCTTGACCTTAAATGGTTATTTTTTCCCGTATAATTCCAATATATCAGCGCATCTTGCTGATATTTTCTGTTCTATAACAATTTAATAAGGGCTG	2	chrIV_602949_T_A;chrIV_603005_G_A	82;26	11	0	firstTileUTR	TRUE
firstTileUTR_01245	YDR078C_5UTR_0	YDR078C_5UTR	chrIV	602886	-	GGCGCGCCGTTCTTTTCTCCCTATTTCTTCTTCATCACCAACACTTTTGCTTTACCGGCTTGACCTTAAAAGGTTATTTTTTCCCGTATAATTCCAATATATCAGCGCATCTTGCTGATATTTTCTGTTCTATAACAATTTAATAAGGGCTG	2	chrIV_602949_T_A;chrIV_603005_G_A	82;26	21	0	firstTileUTR	TRUE
firstTileUTR_01246	YDR078C_5UTR_0	YDR078C_5UTR	chrIV	602886	-	GGCGCGCCGTTCTTTTCTCCCTATTTCTTCTTCATCACCAACACTTTTGCTTTACCGGCTTGACCTTAAATGGTTATTTTTTCCCGTATAATTCCAATATATCAGCGCATCTTGCTGATATTTTCTATTCTATAACAATTTAATAAGGGCTG	2	chrIV_602949_T_A;chrIV_603005_G_A	82;26	12	0	firstTileUTR	TRUE
firstTileUTR_01247	YDR078C_5UTR_0	YDR078C_5UTR	chrIV	602886	-	GGCGCGCCGTTCTTTTCTCCCTATTTCTTCTTCATCACCAACACTTTTGCTTTACCGGCTTGACCTTAAAAGGTTATTTTTTCCCGTATAATTCCAATATATCAGCGCATCTTGCTGATATTTTCTATTCTATAACAATTTAATAAGGGCTG	2	chrIV_602949_T_A;chrIV_603005_G_A	82;26	22	0	firstTileUTR	TRUE
firstTileUTR_01248	YDR079W_5UTR_0	YDR079W_5UTR	chrIV	603033	+	GGCGCGCCGTCAGCCCTTATTAAATTGTTATAGAACAGAAAATATCAGCAAGATGCGCTGATATATTGGAATTATACGGGAAAAAATAACCATTTAAGGTCAAGCCGGTAAAGCAAAAGTGTTGGTGATGAAGAAGAAATAGGGAGAAAAGA	2	chrIV_602949_T_A;chrIV_603005_G_A	61;117	11	0	firstTileUTR	FALSE
firstTileUTR_01249	YDR079W_5UTR_0	YDR079W_5UTR	chrIV	603033	+	GGCGCGCCGTCAGCCCTTATTAAATTGTTATAGAACAGAAAATATCAGCAAGATGCGCTGATATATTGGAATTATACGGGAAAAAATAACCTTTTAAGGTCAAGCCGGTAAAGCAAAAGTGTTGGTGATGAAGAAGAAATAGGGAGAAAAGA	2	chrIV_602949_T_A;chrIV_603005_G_A	61;117	21	0	firstTileUTR	FALSE
firstTileUTR_01250	YDR079W_5UTR_0	YDR079W_5UTR	chrIV	603033	+	GGCGCGCCGTCAGCCCTTATTAAATTGTTATAGAATAGAAAATATCAGCAAGATGCGCTGATATATTGGAATTATACGGGAAAAAATAACCATTTAAGGTCAAGCCGGTAAAGCAAAAGTGTTGGTGATGAAGAAGAAATAGGGAGAAAAGA	2	chrIV_602949_T_A;chrIV_603005_G_A	61;117	12	0	firstTileUTR	FALSE
firstTileUTR_01251	YDR079W_5UTR_0	YDR079W_5UTR	chrIV	603033	+	GGCGCGCCGTCAGCCCTTATTAAATTGTTATAGAATAGAAAATATCAGCAAGATGCGCTGATATATTGGAATTATACGGGAAAAAATAACCTTTTAAGGTCAAGCCGGTAAAGCAAAAGTGTTGGTGATGAAGAAGAAATAGGGAGAAAAGA	2	chrIV_602949_T_A;chrIV_603005_G_A	61;117	22	0	firstTileUTR	FALSE
firstTileUTR_01252	YDR079C-A_5UTR_0	YDR079C-A_5UTR	chrIV	603844	-	GGCGCGCCGTCTCTATTGGGAGTACACTTCTATCTTACTGCAGTTTGCTCGTCTTTTTTCAATAATACGATACAAAAGAAAAATTAAAAGGGCTATTGAGACTGTTGTAAAATATATATGCAAAATAAAAAAGCATTTTAACGAAGAGTATA	1	chrIV_603899_T_C	90	1	0	firstTileUTR	FALSE
firstTileUTR_01253	YDR079C-A_5UTR_0	YDR079C-A_5UTR	chrIV	603844	-	GGCGCGCCGTCTCTATTGGGAGTACACTTCTATCTTACTGCAGTTTGCTCGTCTTTTTTCAACAATACGATACAAAAGAAAAATTAAAAGGGCTATTGAGACTGTTGTAAAATATATATGCAAAATAAAAAAGCATTTTAACGAAGAGTATA	1	chrIV_603899_T_C	90	2	0	firstTileUTR	FALSE
firstTileUTR_01254	YDR080W_5UTR_0	YDR080W_5UTR	chrIV	603976	+	GGCGCGCCAAAATGCTTTTTTATTTTGCATATATATTTTACAACAGTCTCAATAGCCCTTTTAATTTTTCTTTTGTATCGTATTATTGAAAAAAGACGAGCAAACTGCAGTAAGATAGAAGTGTACTCCCAATAGAGACAAAGCCAAGATAC	1	chrIV_603899_T_C	68	1	0	firstTileUTR	FALSE
firstTileUTR_01255	YDR080W_5UTR_0	YDR080W_5UTR	chrIV	603976	+	GGCGCGCCAAAATGCTTTTTTATTTTGCATATATATTTTACAACAGTCTCAATAGCCCTTTTAATTTTTCTTTTGTATCGTATTGTTGAAAAAAGACGAGCAAACTGCAGTAAGATAGAAGTGTACTCCCAATAGAGACAAAGCCAAGATAC	1	chrIV_603899_T_C	68	2	0	firstTileUTR	FALSE
firstTileUTR_01256	YDR086C_5UTR_0	YDR086C_5UTR	chrIV	617263	-	GGCGCGCCACTATTTTCCTTGTTTAATTTAATCACTAGTATTCTTTCATTTCAAAACGAAAAAAAAATAAAAAAAATGTTGCGAGGAAAAAAAGGCGACGTGTTTCGCATTCCGCCAATATCCACAGAGGGTAATGAATTTTTCGTACTATA	2	chrIV_617276_GTTTAA_G;chrIV_617323_T_TA	132;85	11	0	firstTileUTR	FALSE
firstTileUTR_01257	YDR086C_5UTR_0	YDR086C_5UTR	chrIV	617263	-	GGCGCGCCACTATTTTCCTTGTTTAATCACTAGTATTCTTTCATTTCAAAACGAAAAAAAAATAAAAAAAATGTTGCGAGGAAAAAAAGGCGACGTGTTTCGCATTCCGCCAATATCCACAGAGGGTAATGAATTTTTCGTACTATA	2	chrIV_617276_GTTTAA_G;chrIV_617323_T_TA	132;85	21	0	firstTileUTR	FALSE
firstTileUTR_01258	YDR086C_5UTR_0	YDR086C_5UTR	chrIV	617263	-	GGCGCGCCACTATTTTCCTTGTTTAATTTAATCACTAGTATTCTTTCATTTCAAAACGAAAAAAAAATAAAAAAAAATGTTGCGAGGAAAAAAAGGCGACGTGTTTCGCATTCCGCCAATATCCACAGAGGGTAATGAATTTTTCGTACTATA	2	chrIV_617276_GTTTAA_G;chrIV_617323_T_TA	132;85	12	0	firstTileUTR	FALSE
firstTileUTR_01259	YDR086C_5UTR_0	YDR086C_5UTR	chrIV	617263	-	GGCGCGCCACTATTTTCCTTGTTTAATCACTAGTATTCTTTCATTTCAAAACGAAAAAAAAATAAAAAAAAATGTTGCGAGGAAAAAAAGGCGACGTGTTTCGCATTCCGCCAATATCCACAGAGGGTAATGAATTTTTCGTACTATA	2	chrIV_617276_GTTTAA_G;chrIV_617323_T_TA	132;85	22	0	firstTileUTR	FALSE
firstTileUTR_01260	YDR087C_5UTR_0	YDR087C_5UTR	chrIV	618343	-	GGCGCGCCAGTGTATTATGCCGTGAATGCGCAAGATATATACGTATACTTAAGAATGTAGTTTATATTTGACAATTTTTTTCAGCTCATCGCATTTTTTTTTCTAAATTCTTTACCTCTCGTGCTCCGTGACTAGGATATTGGAAATTCAAA	1	chrIV_618461_C_T	27	1	0	firstTileUTR	TRUE
firstTileUTR_01261	YDR087C_5UTR_0	YDR087C_5UTR	chrIV	618343	-	GGCGCGCCAGTGTATTATGCCGTGAATGCGCAAGATATATACGTATACTTAAGAATGTAGTTTATATTTGACAATTTTTTTCAGCTCATCGCATTTTTTTTTCTAAATTCTTTACCTCTCGTGCTTCGTGACTAGGATATTGGAAATTCAAA	1	chrIV_618461_C_T	27	2	0	firstTileUTR	TRUE
firstTileUTR_01262	YDR089W_5UTR_0	YDR089W_5UTR	chrIV	622069	+	GGCGCGCCGGAGATATACAAAAAAAAAGCAAAGGTAAAAAGCAAGTATTAAACTCTATCTCTATTATATTCAAGAGGGCAACGGACGAACTATTAATTTATGAATTTTAAAAGTCCTTTGATAGCGTTCACGATAGGGCTTTTTGATCTTGC	1	chrIV_621945_C_T	21	1	0	firstTileUTR	FALSE
firstTileUTR_01263	YDR089W_5UTR_0	YDR089W_5UTR	chrIV	622069	+	GGCGCGCCGGAGATATACAAAAAAAAAGCAAAGGTAAAAAGCAAGTATTAAACTCTATCTCTATTATATTCAAGAGGGCAACGGACGAACTATTAATTTATGAATTTTAAAAGTCCTTTGATAGCGTTCACAATAGGGCTTTTTGATCTTGC	1	chrIV_621945_C_T	21	2	0	firstTileUTR	FALSE
firstTileUTR_01264	YDR096W_5UTR_0	YDR096W_5UTR	chrIV	636856	+	GGCGCGCCAGACCAACTTCTTTTGCCTTCTGTATGGCGGGAGGAGGAGGGGGGAGGTTTTCTTCTTGTTTTTTCCGTTAACTTTTTCCCGATATGCGTAGAAGGATAATAATTTCAAATACACAACTCACACACGCGTTTGTACTTCTACCT	1	chrIV_636810_TC_T	99	1	0	firstTileUTR	TRUE
firstTileUTR_01265	YDR096W_5UTR_0	YDR096W_5UTR	chrIV	636856	+	GGCGCGCCAGACCAACTTCTTTTGCCTTCTGTATGGCGGGAGGAGGAGGGGGAGGTTTTCTTCTTGTTTTTTCCGTTAACTTTTTCCCGATATGCGTAGAAGGATAATAATTTCAAATACACAACTCACACACGCGTTTGTACTTCTACCT	1	chrIV_636810_TC_T	99	2	0	firstTileUTR	TRUE
firstTileUTR_01266	YDR100W_5UTR_0	YDR100W_5UTR	chrIV	654973	+	GGCGCGCCATTGTCCTCTCTTGTAAGACATACATATTAATGGTCATAGTTTTCCACTCGAAGTATTTTTCCGTTGCGGATTTACGCTACTATACCCCCGCCCCCCTACACCCAGGGAGCGCTGTTTCATCAAATGAGAAAAGATGCCTTCAC	1	chrIV_654943_T_C	115	1	0	firstTileUTR	TRUE
firstTileUTR_01267	YDR100W_5UTR_0	YDR100W_5UTR	chrIV	654973	+	GGCGCGCCATTGTCCTCTCTTGTAAGACATACATATTGATGGTCATAGTTTTCCACTCGAAGTATTTTTCCGTTGCGGATTTACGCTACTATACCCCCGCCCCCCTACACCCAGGGAGCGCTGTTTCATCAAATGAGAAAAGATGCCTTCAC	1	chrIV_654943_T_C	115	2	0	firstTileUTR	TRUE
firstTileUTR_01268	YDR103W_5UTR_0	YDR103W_5UTR	chrIV	657739	+	GGCGCGCCGACTGCTCTTTCGTGCAATTCATACTGTATTATTATAGTTGCAACTAGATGGCAAAAAATTGATAATGCCCTAAAAATGACAGGCCGGTAACCCTAAGCTTTTTTTTACCCGGAGAGGGTCATGCCTCTGTGAAGCTTTTTTTG	1	chrIV_657631_TA_TAA	37	1	0	firstTileUTR	TRUE
firstTileUTR_01269	YDR103W_5UTR_0	YDR103W_5UTR	chrIV	657739	+	GGCGCGCCGACTGCTCTTTCGTGCAATTCATACTGTATTATTATAGTTGCAACTAGATGGCAAAAAATTGATAATGCCCTAAAAATGACAGGCCGGTAACCCTAAGCTTTTTTTTTACCCGGAGAGGGTCATGCCTCTGTGAAGCTTTTTTTG	1	chrIV_657631_TA_TAA	37	2	0	firstTileUTR	TRUE
firstTileUTR_01270	YDR119W_5UTR_0	YDR119W_5UTR	chrIV	688132	+	GGCGCGCCATAGTATATCAGCTAAATTATCTTAAGATAAGCAATAAAAAGTGAGATAACGATGAAAAAAAAAAAAAAGACTTGACACAATTGACTCCATTTTGAGATTGCGGGCCCTTGAAATTTTTTTTTTTTCTCAGTACACCACAGGCG	1	chrIV_688062_C_CTT	75	1	0	firstTileUTR	FALSE
firstTileUTR_01271	YDR119W_5UTR_0	YDR119W_5UTR	chrIV	688132	+	GGCGCGCCATAGTATATCAGCTAAATTATCTTAAGATAAGCAATAAAAAGTGAGATAACGATGAAAAAAAAAAAAAAAAGACTTGACACAATTGACTCCATTTTGAGATTGCGGGCCCTTGAAATTTTTTTTTTTTCTCAGTACACCACAGGCG	1	chrIV_688062_C_CTT	75	2	0	firstTileUTR	FALSE
firstTileUTR_01272	YDR121W_5UTR_0	YDR121W_5UTR	chrIV	693452	+	GGCGCGCCGTGCCGCTATGAATAACAATTTTAAGCTCTGATGATCGAATCTGGTTTTTAACGTTATTCCAATTTGAGCCTTTCTTTATTCGTCCAAAGGGATAAAGCATTATTTTTTTTTCATCGCATTCAATGCTCATCGCAAAGTTACAG	1	chrIV_693401_TAA_T	94	1	0	firstTileUTR	TRUE
firstTileUTR_01273	YDR121W_5UTR_0	YDR121W_5UTR	chrIV	693452	+	GGCGCGCCGTGCCGCTATGAATAACAATTTTAAGCTCTGATGATCGAATCTGGTTTAACGTTATTCCAATTTGAGCCTTTCTTTATTCGTCCAAAGGGATAAAGCATTATTTTTTTTTCATCGCATTCAATGCTCATCGCAAAGTTACAG	1	chrIV_693401_TAA_T	94	2	0	firstTileUTR	TRUE
firstTileUTR_01274	YDR122W_5UTR_0	YDR122W_5UTR	chrIV	694393	+	GGCGCGCCACACTTCCTCAACGCCATAATTTCTTGTTAACGTTCCACCAATATCAACTTCTTGTCCCCTTTCTTTCCTTCCGCATTGGCGCCGCGTTGGGTTCCCCGGCTTGCAAATAACGACGATGAGTATAGCTTATTATGTATGTAGGT	1	chrIV_694335_G_A	87	1	0	firstTileUTR	TRUE
firstTileUTR_01275	YDR122W_5UTR_0	YDR122W_5UTR	chrIV	694393	+	GGCGCGCCACACTTCCTCAACGCCATAATTTCTTGTTAACGTTCCACCAATATCAACTTCTTGTCTCCTTTCTTTCCTTCCGCATTGGCGCCGCGTTGGGTTCCCCGGCTTGCAAATAACGACGATGAGTATAGCTTATTATGTATGTAGGT	1	chrIV_694335_G_A	87	2	0	firstTileUTR	TRUE
firstTileUTR_01276	YDR132C_5UTR_0	YDR132C_5UTR	chrIV	720422	-	GGCGCGCCACATTTTTTTCACTGCTCAGACTATTCAATTTTATTCGAGAGGAGAATCCATTAGAATTTTGACTTAGTAAGCAATTGCGGCTTACATGATTTTCCAAGAAGTTCAGTCGCCCGTGCAACAAAGACAAAAGCA	3	chrIV_720439_T_A;chrIV_720440_C_T;chrIV_720543_A_AAAGACAAAAGCAAGCT	117;116;13	111	0	firstTileUTR	FALSE
firstTileUTR_01277	YDR132C_5UTR_0	YDR132C_5UTR	chrIV	720422	-	GGCGCGCCACATTTTTTTCACTGCACAGACTATTCAATTTTATTCGAGAGGAGAATCCATTAGAATTTTGACTTAGTAAGCAATTGCGGCTTACATGATTTTCCAAGAAGTTCAGTCGCCCGTGCAACAAAGACAAAAGCA	3	chrIV_720439_T_A;chrIV_720440_C_T;chrIV_720543_A_AAAGACAAAAGCAAGCT	117;116;13	211	0	firstTileUTR	FALSE
firstTileUTR_01278	YDR132C_5UTR_0	YDR132C_5UTR	chrIV	720422	-	GGCGCGCCACATTTTTTTCACTGCTTAGACTATTCAATTTTATTCGAGAGGAGAATCCATTAGAATTTTGACTTAGTAAGCAATTGCGGCTTACATGATTTTCCAAGAAGTTCAGTCGCCCGTGCAACAAAGACAAAAGCA	3	chrIV_720439_T_A;chrIV_720440_C_T;chrIV_720543_A_AAAGACAAAAGCAAGCT	117;116;13	121	0	firstTileUTR	FALSE
firstTileUTR_01279	YDR132C_5UTR_0	YDR132C_5UTR	chrIV	720422	-	GGCGCGCCACATTTTTTTCACTGCTCAGACTATTCAATTTTATTCGAGAGGAGAATCCATTAGAATTTTGACTTAGTAAGCAATTGCGGCTTACATGATTTTCCAAGAAGTTCAGTCGCCCGTGCAACAAAGACAAAAGCAAGCTAAGACAAAAGCA	3	chrIV_720439_T_A;chrIV_720440_C_T;chrIV_720543_A_AAAGACAAAAGCAAGCT	117;116;13	112	0	firstTileUTR	FALSE
firstTileUTR_01280	YDR132C_5UTR_0	YDR132C_5UTR	chrIV	720422	-	GGCGCGCCACATTTTTTTCACTGCATAGACTATTCAATTTTATTCGAGAGGAGAATCCATTAGAATTTTGACTTAGTAAGCAATTGCGGCTTACATGATTTTCCAAGAAGTTCAGTCGCCCGTGCAACAAAGACAAAAGCAAGCTAAGACAAAAGCA	3	chrIV_720439_T_A;chrIV_720440_C_T;chrIV_720543_A_AAAGACAAAAGCAAGCT	117;116;13	222	0	firstTileUTR	FALSE
firstTileUTR_01281	YDR135C_5UTR_0	YDR135C_5UTR	chrIV	727594	-	GGCGCGCCAAACTGTTAATTGAAAAATTGTAGGTTGTAAACCAGCTTCCACATAGCAGATGATCACAAGAGGTTATCGCACCTTTTATAGCAGCTGCTAACTTTTTTCATCAATTTCGTAATTACTAAGCCGTAACCTTCCACCGCCCAAGC	2	chrIV_727626_A_G;chrIV_727685_A_G	113;54	11	0	firstTileUTR	FALSE
firstTileUTR_01282	YDR135C_5UTR_0	YDR135C_5UTR	chrIV	727594	-	GGCGCGCCAAACTGTTAATTGAAAAATTGTAGGTTGTAAGCCAGCTTCCACATAGCAGATGATCACAAGAGGTTATCGCACCTTTTATAGCAGCTGCTAACTTTTTTCATCAATTTCGTAATTACTAAGCCGTAACCTTCCACCGCCCAAGC	2	chrIV_727626_A_G;chrIV_727685_A_G	113;54	21	0	firstTileUTR	FALSE
firstTileUTR_01283	YDR135C_5UTR_0	YDR135C_5UTR	chrIV	727594	-	GGCGCGCCAAACTGTTAATTGAAAAATTGTAGGTTGTAAACCAGCTTCCACATAGCAGATGATCACAAGAGGTTATCGCACCTTTTATAGCAGCTGCTGACTTTTTTCATCAATTTCGTAATTACTAAGCCGTAACCTTCCACCGCCCAAGC	2	chrIV_727626_A_G;chrIV_727685_A_G	113;54	12	0	firstTileUTR	FALSE
firstTileUTR_01284	YDR135C_5UTR_0	YDR135C_5UTR	chrIV	727594	-	GGCGCGCCAAACTGTTAATTGAAAAATTGTAGGTTGTAAGCCAGCTTCCACATAGCAGATGATCACAAGAGGTTATCGCACCTTTTATAGCAGCTGCTGACTTTTTTCATCAATTTCGTAATTACTAAGCCGTAACCTTCCACCGCCCAAGC	2	chrIV_727626_A_G;chrIV_727685_A_G	113;54	22	0	firstTileUTR	FALSE
firstTileUTR_01285	YDR139C_5UTR_0	YDR139C_5UTR	chrIV	733975	-	GGCGCGCCGGAATACTTCATTTGAATAACAGAATTTTGGTTTTTCAGCTAAAAGTTGTTCGTTTGCCTTCCCGAAGACGCCATCGGAATTTGATTTCATATAAATATTGATATAATTATACTCTGAAATATAATATTGATAAACTTAACACA	1	chrIV_734082_ATTATAC_A	38	1	0	firstTileUTR	TRUE
firstTileUTR_01286	YDR139C_5UTR_0	YDR139C_5UTR	chrIV	733975	-	GGCGCGCCGGAATACTTCATTTGAATAACAGAATTTTGGTTTTTCAGCTAAAAGTTGTTCGTTTGCCTTCCCGAAGACGCCATCGGAATTTGATTTCATATAAATATTGATATAATCTGAAATATAATATTGATAAACTTAACACA	1	chrIV_734082_ATTATAC_A	38	2	0	firstTileUTR	TRUE
firstTileUTR_01287	YDR140W_5UTR_0	YDR140W_5UTR	chrIV	734124	+	GGCGCGCCACCCTGTGTTAAGTTTATCAATATTATATTTCAGAGTATAATTATATCAATATTTATATGAAATCAAATTCCGATGGCGTCTTCGGGAAGGCAAACGAACAACTTTTAGCTGAAAAACCAAAATTCTGTTATTCAAATGAAGTA	1	chrIV_734082_ATTATAC_A	103	1	0	firstTileUTR	FALSE
firstTileUTR_01288	YDR140W_5UTR_0	YDR140W_5UTR	chrIV	734124	+	GGCGCGCCACCCTGTGTTAAGTTTATCAATATTATATTTCAGATTATATCAATATTTATATGAAATCAAATTCCGATGGCGTCTTCGGGAAGGCAAACGAACAACTTTTAGCTGAAAAACCAAAATTCTGTTATTCAAATGAAGTA	1	chrIV_734082_ATTATAC_A	103	2	0	firstTileUTR	FALSE
firstTileUTR_01289	YDR142C_5UTR_0	YDR142C_5UTR	chrIV	741769	-	GGCGCGCCACCTTTTACTGTTTTGCGAAACGACTTTTCAGAGGAGGTTATGTCGGTGGTTTAATTTCTCGGCCTTCATATTTACTTGCTGGAGACATGCAAATTTCTGATTAACAATGATTATAGAACTTTAAGTAGAAGTAAAGAAAAATA	2	chrIV_741803_G_C;chrIV_741894_A_G	111;20	11	0	firstTileUTR	TRUE
firstTileUTR_01290	YDR142C_5UTR_0	YDR142C_5UTR	chrIV	741769	-	GGCGCGCCACCTTTTACTGTTTTGCGAAACGACTTTTCAGACGAGGTTATGTCGGTGGTTTAATTTCTCGGCCTTCATATTTACTTGCTGGAGACATGCAAATTTCTGATTAACAATGATTATAGAACTTTAAGTAGAAGTAAAGAAAAATA	2	chrIV_741803_G_C;chrIV_741894_A_G	111;20	21	0	firstTileUTR	TRUE
firstTileUTR_01291	YDR142C_5UTR_0	YDR142C_5UTR	chrIV	741769	-	GGCGCGCCACCTTTTACTGTTTTGCGAAACGACTTTTCAGAGGAGGTTATGTCGGTGGTTTAATTTCTCGGCCTTCATATTTACTTGCTGGAGACATGCAAATTTCTGATTAACAATGATTATAGAACTTTAGGTAGAAGTAAAGAAAAATA	2	chrIV_741803_G_C;chrIV_741894_A_G	111;20	12	0	firstTileUTR	TRUE
firstTileUTR_01292	YDR142C_5UTR_0	YDR142C_5UTR	chrIV	741769	-	GGCGCGCCACCTTTTACTGTTTTGCGAAACGACTTTTCAGACGAGGTTATGTCGGTGGTTTAATTTCTCGGCCTTCATATTTACTTGCTGGAGACATGCAAATTTCTGATTAACAATGATTATAGAACTTTAGGTAGAAGTAAAGAAAAATA	2	chrIV_741803_G_C;chrIV_741894_A_G	111;20	22	0	firstTileUTR	TRUE
firstTileUTR_01293	YDR143C_5UTR_0	YDR143C_5UTR	chrIV	744020	-	GGCGCGCCATAGTTTTTAGCTATTATTTCATTATTGATTTGGTGATACTAATGCAATGTAGTTATATGTAAAAAATTCTTTCATATTTTTTGACAATGGCAGATAGAATGTTTTACCCGGCTTTTTGCGTCGAAGTATATAATTGTTGATTA	3	chrIV_744041_C_T;chrIV_744157_G_A;chrIV_744159_T_C	124;8;6	111	0	firstTileUTR	TRUE
firstTileUTR_01294	YDR143C_5UTR_0	YDR143C_5UTR	chrIV	744020	-	GGCGCGCCATAGTTTTTAGCTATTATTTTATTATTGATTTGGTGATACTAATGCAATGTAGTTATATGTAAAAAATTCTTTCATATTTTTTGACAATGGCAGATAGAATGTTTTACCCGGCTTTTTGCGTCGAAGTATATAATTGTTGATTA	3	chrIV_744041_C_T;chrIV_744157_G_A;chrIV_744159_T_C	124;8;6	211	0	firstTileUTR	TRUE
firstTileUTR_01295	YDR143C_5UTR_0	YDR143C_5UTR	chrIV	744020	-	GGCGCGCCATAGTTTTTAGCTATTATTTCATTATTGATTTGGTGATACTAATGCAATGTAGTTATATGTAAAAAATTCTTTCATATTTTTTGACAATGGCAGATAGAATGTTTTACCCGGCTTTTTGCGTCGAAGTATATAATTATTGATTA	3	chrIV_744041_C_T;chrIV_744157_G_A;chrIV_744159_T_C	124;8;6	121	0	firstTileUTR	TRUE
firstTileUTR_01296	YDR143C_5UTR_0	YDR143C_5UTR	chrIV	744020	-	GGCGCGCCATAGTTTTTAGCTATTATTTCATTATTGATTTGGTGATACTAATGCAATGTAGTTATATGTAAAAAATTCTTTCATATTTTTTGACAATGGCAGATAGAATGTTTTACCCGGCTTTTTGCGTCGAAGTATATAATTGTCGATTA	3	chrIV_744041_C_T;chrIV_744157_G_A;chrIV_744159_T_C	124;8;6	112	0	firstTileUTR	TRUE
firstTileUTR_01297	YDR143C_5UTR_0	YDR143C_5UTR	chrIV	744020	-	GGCGCGCCATAGTTTTTAGCTATTATTTTATTATTGATTTGGTGATACTAATGCAATGTAGTTATATGTAAAAAATTCTTTCATATTTTTTGACAATGGCAGATAGAATGTTTTACCCGGCTTTTTGCGTCGAAGTATATAATTATCGATTA	3	chrIV_744041_C_T;chrIV_744157_G_A;chrIV_744159_T_C	124;8;6	222	0	firstTileUTR	TRUE
firstTileUTR_01298	YDR144C_5UTR_0	YDR144C_5UTR	chrIV	746241	-	GGCGCGCCGATTATCTGAATAATGAAAGATGGTAGGAAATAAGGTATTGAAACAGGTTCAAAACTTTAAAAGAAAACTGCCAAATAAACTTTCTCGATGCGTAGCTGAAATTTCAACTTCAAAAAAAAAAAAACGCGTGTAACTTTCTACGT	1	chrIV_746353_CAA_CA	33	1	0	firstTileUTR	FALSE
firstTileUTR_01299	YDR144C_5UTR_0	YDR144C_5UTR	chrIV	746241	-	GGCGCGCCGATTATCTGAATAATGAAAGATGGTAGGAAATAAGGTATTGAAACAGGTTCAAAACTTTAAAAGAAAACTGCCAAATAAACTTTCTCGATGCGTAGCTGAAATTTCAACTTCAAAAAAAAAAAACGCGTGTAACTTTCTACGT	1	chrIV_746353_CAA_CA	33	2	0	firstTileUTR	FALSE
firstTileUTR_01300	YDR145W_5UTR_0	YDR145W_5UTR	chrIV	746651	+	GGCGCGCCGCGCTATATATGCCCATTATTCATTTGCTCCGACTTAAGTCTAACACATTTTTTAACAAAATTCGCCGCGTATACTGCCCGGGTAATACAGCCAAAATCGTGATATTCATTTGATACGTTTACTTGCAAAGCTGTCATGAATCA	1	chrIV_746550_A_C	44	1	0	firstTileUTR	TRUE
firstTileUTR_01301	YDR145W_5UTR_0	YDR145W_5UTR	chrIV	746651	+	GGCGCGCCGCGCTATATATGCCCATTATTCATTTGCTCCGACTTAAGTCTAACACATTTTTTAACAAAATTCGCCGCGTATACTGCCCGGGTAATACAGCCAAAATCGGGATATTCATTTGATACGTTTACTTGCAAAGCTGTCATGAATCA	1	chrIV_746550_A_C	44	2	0	firstTileUTR	TRUE
firstTileUTR_01302	YDR147W_5UTR_0	YDR147W_5UTR	chrIV	751569	+	GGCGCGCCGCGTACCACAACAATTTAGTAATTTTGTGCCAATCTGTTATCTCAACAACGACATCTATTGTTTTGTAGATTTGCATACACTTTCTTTTGCAAACGACCTCCGGGTAGCCAAAACCCAAACGATATTTTTTTACTATCATCACC	1	chrIV_751490_G_A	66	1	0	firstTileUTR	TRUE
firstTileUTR_01303	YDR147W_5UTR_0	YDR147W_5UTR	chrIV	751569	+	GGCGCGCCGCGTACCACAACAATTTAGTAATTTTGTGCCAATCTGTTATCTCAACAACGACATCTATTGTTTTGTAGATTTGCATATACTTTCTTTTGCAAACGACCTCCGGGTAGCCAAAACCCAAACGATATTTTTTTACTATCATCACC	1	chrIV_751490_G_A	66	2	0	firstTileUTR	TRUE
firstTileUTR_01304	YDR148C_5UTR_0	YDR148C_5UTR	chrIV	755089	-	GGCGCGCCGTGTCTTTGGTTGTAACAAATGTGGTAGTGAAGTTTATAACAATATATCTATTCACTGATATATACCGTTAAAGATAGCTGCCTAATTTTTTATTTCGGATTTTTCTTTTTTTTACGTTAGATATTTCCTCCCCTGAAGCTCAA	1	chrIV_755101_T_C	133	1	0	firstTileUTR	TRUE
firstTileUTR_01305	YDR148C_5UTR_0	YDR148C_5UTR	chrIV	755089	-	GGCGCGCCGTGTCTTTGGTCGTAACAAATGTGGTAGTGAAGTTTATAACAATATATCTATTCACTGATATATACCGTTAAAGATAGCTGCCTAATTTTTTATTTCGGATTTTTCTTTTTTTTACGTTAGATATTTCCTCCCCTGAAGCTCAA	1	chrIV_755101_T_C	133	2	0	firstTileUTR	TRUE
firstTileUTR_01306	YDR161W_5UTR_0	YDR161W_5UTR	chrIV	779020	+	GGCGCGCCGAAGATGCTTTTAGGTATAAGTTCTAAATTTTCTTAGAACTATGAATTTCACTATAAGTAGGCAACTAATAACTATTAACCTACTAAGGTCATCTCATCGAAATTTTTTTTTCTTCATTTTCAAAAAATATTCAGTTACCCGCA	1	chrIV_778909_A_AT	34	1	0	firstTileUTR	TRUE
firstTileUTR_01307	YDR161W_5UTR_0	YDR161W_5UTR	chrIV	779020	+	GGCGCGCCGAAGATGCTTTTAGGTATAAGTTCTAAATTTTCTTAGAACTATGAATTTCACTATAAGTAGGCAACTAATAACTATTAACCTACTAAGGTCATCTCATCGAAATTTTTTTATTCTTCATTTTCAAAAAATATTCAGTTACCCGCA	1	chrIV_778909_A_AT	34	2	0	firstTileUTR	TRUE
firstTileUTR_01308	YDR164C_5UTR_0	YDR164C_5UTR	chrIV	784257	-	GGCGCGCCAGTGGATTCTAATTATTTTCAAGGTCTTACAAAGCAATGTCTTACTAGTTTCAATAGGGACTTAAACTGATCGTTTAAGCAAAAGAAAAACACCGTGCTGTGTGACCATCTACCAATAATTGCGAGAACATAAGACGACGCCGC	1	chrIV_784282_T_C	120	1	0	firstTileUTR	FALSE
firstTileUTR_01309	YDR164C_5UTR_0	YDR164C_5UTR	chrIV	784257	-	GGCGCGCCAGTGGATTCTAATTATTTTCAAGGCCTTACAAAGCAATGTCTTACTAGTTTCAATAGGGACTTAAACTGATCGTTTAAGCAAAAGAAAAACACCGTGCTGTGTGACCATCTACCAATAATTGCGAGAACATAAGACGACGCCGC	1	chrIV_784282_T_C	120	2	0	firstTileUTR	FALSE
firstTileUTR_01310	YDR169C_5UTR_0	YDR169C_5UTR	chrIV	794255	-	GGCGCGCCGGATTGCGTGAGATTGTGTGGAGATGAACATGAGAAGGATAAAGACTATCTGAAATAGTTCACTCTTCGGTTACTAAGGTAAGGAAGGCGCCTCTACCCTCTCAGCGCGCACGTGCGGAGTGATCAGCCTACTACCGTAGGGAC	1	chrIV_794376_T_C	24	1	0	firstTileUTR	FALSE
firstTileUTR_01311	YDR169C_5UTR_0	YDR169C_5UTR	chrIV	794255	-	GGCGCGCCGGATTGCGTGAGATTGTGTGGAGATGAACATGAGAAGGATAAAGACTATCTGAAATAGTTCACTCTTCGGTTACTAAGGTAAGGAAGGCGCCTCTACCCTCTCAGCGCGCACGTGCGGAGCGATCAGCCTACTACCGTAGGGAC	1	chrIV_794376_T_C	24	2	0	firstTileUTR	FALSE
firstTileUTR_01312	YDR173C_5UTR_0	YDR173C_5UTR	chrIV	811682	-	GGCGCGCCACTAATGGAAATTGTTTAACTGATTACTGGTAAAAAAGGGATCTCCAATGGCTTTATCTTATTCCATTTTGTCCCACCATTTGTATACAGTATAAAGACATTTTGGTGAGATACTTAGTTACCCAGCCTACTTCTGAGAAATAT	2	chrIV_811697_T_C;chrIV_811818_G_A	130;9	11	0	firstTileUTR	TRUE
firstTileUTR_01313	YDR173C_5UTR_0	YDR173C_5UTR	chrIV	811682	-	GGCGCGCCACTAATGGAAATTGCTTAACTGATTACTGGTAAAAAAGGGATCTCCAATGGCTTTATCTTATTCCATTTTGTCCCACCATTTGTATACAGTATAAAGACATTTTGGTGAGATACTTAGTTACCCAGCCTACTTCTGAGAAATAT	2	chrIV_811697_T_C;chrIV_811818_G_A	130;9	21	0	firstTileUTR	TRUE
firstTileUTR_01314	YDR173C_5UTR_0	YDR173C_5UTR	chrIV	811682	-	GGCGCGCCACTAATGGAAATTGTTTAACTGATTACTGGTAAAAAAGGGATCTCCAATGGCTTTATCTTATTCCATTTTGTCCCACCATTTGTATACAGTATAAAGACATTTTGGTGAGATACTTAGTTACCCAGCCTACTTCTAAGAAATAT	2	chrIV_811697_T_C;chrIV_811818_G_A	130;9	12	0	firstTileUTR	TRUE
firstTileUTR_01315	YDR173C_5UTR_0	YDR173C_5UTR	chrIV	811682	-	GGCGCGCCACTAATGGAAATTGCTTAACTGATTACTGGTAAAAAAGGGATCTCCAATGGCTTTATCTTATTCCATTTTGTCCCACCATTTGTATACAGTATAAAGACATTTTGGTGAGATACTTAGTTACCCAGCCTACTTCTAAGAAATAT	2	chrIV_811697_T_C;chrIV_811818_G_A	130;9	22	0	firstTileUTR	TRUE
firstTileUTR_01316	YDR177W_5UTR_0	YDR177W_5UTR	chrIV	816762	+	GGCGCGCCGCCCGCGATCGGAAGTTCATGCATTCAACTGTCATCTCATTGTTTTTGCCCCTCCAAATATTTCAGATGGAAGAAAATGTAACAAAAAAGGATATTAATGTTCGTATTATGTGACTATTTTTTTTTTTTTATGGATAGTTATCC	2	chrIV_816631_TAA_TA;chrIV_816707_G_C	14;90	11	0	firstTileUTR	TRUE
firstTileUTR_01317	YDR177W_5UTR_0	YDR177W_5UTR	chrIV	816762	+	GGCGCGCCGCCCGCGATCGGAAGTTCATGCATTCAACTGTCATCTCATTGTTTTTGCCCCTCCAAATATTTCAGATGGAAGAAAATGTAACAAAAAAGGATATTAATGTTCGTATTATGTGACTATTTTTTTTTTTTATGGATAGTTATCC	2	chrIV_816631_TAA_TA;chrIV_816707_G_C	14;90	21	0	firstTileUTR	TRUE
firstTileUTR_01318	YDR177W_5UTR_0	YDR177W_5UTR	chrIV	816762	+	GGCGCGCCGCCCGCGATCGGAAGTTCATGCATTCAACTGTCATCTCATTGTTTTTGCCCCTCGAAATATTTCAGATGGAAGAAAATGTAACAAAAAAGGATATTAATGTTCGTATTATGTGACTATTTTTTTTTTTTTATGGATAGTTATCC	2	chrIV_816631_TAA_TA;chrIV_816707_G_C	14;90	12	0	firstTileUTR	TRUE
firstTileUTR_01319	YDR177W_5UTR_0	YDR177W_5UTR	chrIV	816762	+	GGCGCGCCGCCCGCGATCGGAAGTTCATGCATTCAACTGTCATCTCATTGTTTTTGCCCCTCGAAATATTTCAGATGGAAGAAAATGTAACAAAAAAGGATATTAATGTTCGTATTATGTGACTATTTTTTTTTTTTATGGATAGTTATCC	2	chrIV_816631_TAA_TA;chrIV_816707_G_C	14;90	22	0	firstTileUTR	TRUE
firstTileUTR_01320	YDR178W_5UTR_0	YDR178W_5UTR	chrIV	817848	+	GGCGCGCCATCCTTCTATCTTTGCCTTAAAGCGATCCGCAGTCGGTCCCCTGATCGCTCGAGGGCTTCTCCTTATATAACTAAATTGCGCCTGTGTTCTTCCGAAGGTGCCCCGGAATAAAAAAAACAGCAGCGATTGGCTCAATGCTTATG	1	chrIV_817729_G_GT	26	1	0	firstTileUTR	TRUE
firstTileUTR_01321	YDR178W_5UTR_0	YDR178W_5UTR	chrIV	817848	+	GGCGCGCCATCCTTCTATCTTTGCCTTAAAGCGATCCGCAGTCGGTCCCCTGATCGCTCGAGGGCTTCTCCTTATATAACTAAATTGCGCCTGTGTTCTTCCGAAGGTGCCCCGGAATAAAAAAAAACAGCAGCGATTGGCTCAATGCTTATG	1	chrIV_817729_G_GT	26	2	0	firstTileUTR	TRUE
firstTileUTR_01322	YDR179C_5UTR_0	YDR179C_5UTR	chrIV	819204	-	GGCGCGCCATCTGTACTACGTAGGTCATCACTGTTATTGTTTTTTATTTCTTTGTTTACTATTGTCCGTAATATAAATACATATTAAAAAAGTTGATGATGAGTTGCTCAATAATTTTCGCATTCCCTAAGATACAACGAACCAAAGGCAAG	1	chrIV_819242_A_G	107	1	0	firstTileUTR	TRUE
firstTileUTR_01323	YDR179C_5UTR_0	YDR179C_5UTR	chrIV	819204	-	GGCGCGCCATCTGTACTACGTAGGTCATCACTGTTATTGTTTTTTGTTTCTTTGTTTACTATTGTCCGTAATATAAATACATATTAAAAAAGTTGATGATGAGTTGCTCAATAATTTTCGCATTCCCTAAGATACAACGAACCAAAGGCAAG	1	chrIV_819242_A_G	107	2	0	firstTileUTR	TRUE
firstTileUTR_01324	YDR179W-A_5UTR_0	YDR179W-A_5UTR	chrIV	819340	+	GGCGCGCCGGTTCGTTGTATCTTAGGGAATGCGAAAATTATTGAGCAACTCATCATCAACTTTTTTAATATGTATTTATATTACGGACAATAGTAAACAAAGAAATAAAAAACAATAACAGTGATGACCTACGTAGTACAGATAAGAGAGAA	1	chrIV_819242_A_G	47	1	0	firstTileUTR	FALSE
firstTileUTR_01325	YDR179W-A_5UTR_0	YDR179W-A_5UTR	chrIV	819340	+	GGCGCGCCGGTTCGTTGTATCTTAGGGAATGCGAAAATTATTGAGCAACTCATCATCAACTTTTTTAATATGTATTTATATTACGGACAATAGTAAACAAAGAAACAAAAAACAATAACAGTGATGACCTACGTAGTACAGATAAGAGAGAA	1	chrIV_819242_A_G	47	2	0	firstTileUTR	FALSE
firstTileUTR_01326	YDR180W_5UTR_0	YDR180W_5UTR	chrIV	821152	+	GGCGCGCCATCGAACTCTAAGCCTGAGCTAGAAAAAACTTTAGTTACTAAACTGCATCGTTCTTTTTCAGCCAGTGTTTTTTTTAAGCGAAGTGGCGGCAGTTTCGCGTTTAACATAAAAGCAATACCACTTTTACCTGTTCGGGCAAAAGG	2	chrIV_821075_T_TAAA;chrIV_821138_G_A	68;131	11	0	firstTileUTR	TRUE
firstTileUTR_01327	YDR180W_5UTR_0	YDR180W_5UTR	chrIV	821152	+	GGCGCGCCATCGAACTCTAAGCCTGAGCTAGAAAAAACTTTAGTTACTAAACTGCATCGTTCTTTTTCAGCCAGTGTTTTTTTTTTTAAGCGAAGTGGCGGCAGTTTCGCGTTTAACATAAAAGCAATACCACTTTTACCTGTTCGGGCAAAAGG	2	chrIV_821075_T_TAAA;chrIV_821138_G_A	68;131	21	0	firstTileUTR	TRUE
firstTileUTR_01328	YDR180W_5UTR_0	YDR180W_5UTR	chrIV	821152	+	GGCGCGCCATCGAACTCTAAGTCTGAGCTAGAAAAAACTTTAGTTACTAAACTGCATCGTTCTTTTTCAGCCAGTGTTTTTTTTAAGCGAAGTGGCGGCAGTTTCGCGTTTAACATAAAAGCAATACCACTTTTACCTGTTCGGGCAAAAGG	2	chrIV_821075_T_TAAA;chrIV_821138_G_A	68;131	12	0	firstTileUTR	TRUE
firstTileUTR_01329	YDR180W_5UTR_0	YDR180W_5UTR	chrIV	821152	+	GGCGCGCCATCGAACTCTAAGTCTGAGCTAGAAAAAACTTTAGTTACTAAACTGCATCGTTCTTTTTCAGCCAGTGTTTTTTTTTTTAAGCGAAGTGGCGGCAGTTTCGCGTTTAACATAAAAGCAATACCACTTTTACCTGTTCGGGCAAAAGG	2	chrIV_821075_T_TAAA;chrIV_821138_G_A	68;131	22	0	firstTileUTR	TRUE
firstTileUTR_01330	YDR192C_5UTR_0	YDR192C_5UTR	chrIV	844919	-	GGCGCGCCAAAGTACAACAGTTCAGTGTTATAGTACTTTAAACATTGTGCGCTCATCTATTGATTCACTATTTTTTTTCAAATACCTTGCACCCTCAGTCGGCGTGTTTCTTGATATGCAGAATTAATATATTTCTAGATGTCAGTATATTA	1	chrIV_844958_G_A	106	1	0	firstTileUTR	TRUE
firstTileUTR_01331	YDR192C_5UTR_0	YDR192C_5UTR	chrIV	844919	-	GGCGCGCCAAAGTACAACAGTTCAGTGTTATAGTACTTTAAACATTATGCGCTCATCTATTGATTCACTATTTTTTTTCAAATACCTTGCACCCTCAGTCGGCGTGTTTCTTGATATGCAGAATTAATATATTTCTAGATGTCAGTATATTA	1	chrIV_844958_G_A	106	2	0	firstTileUTR	TRUE
firstTileUTR_01332	YDR195W_5UTR_0	YDR195W_5UTR	chrIV	848360	+	GGCGCGCCGTTTTGTTCTGCCTCCAACAGTGTATGCTTGTTAACAAGTGCCTCAATCGAATATCATCGATTTTTTATACCGCCTTGAGAAAAACTGACGAAAAACGCTGGCGCCGGAGAGTCGTGTATCGTGATATATCGTGATTTACAACT	1	chrIV_848316_A_G	101	1	0	firstTileUTR	TRUE
firstTileUTR_01333	YDR195W_5UTR_0	YDR195W_5UTR	chrIV	848360	+	GGCGCGCCGTTTTGTTCTGCCTCCAACAGTGTATGCTTGTTAACAAGTGCCCCAATCGAATATCATCGATTTTTTATACCGCCTTGAGAAAAACTGACGAAAAACGCTGGCGCCGGAGAGTCGTGTATCGTGATATATCGTGATTTACAACT	1	chrIV_848316_A_G	101	2	0	firstTileUTR	TRUE
firstTileUTR_01334	YDR197W_5UTR_0	YDR197W_5UTR	chrIV	851195	+	GGCGCGCCGGTTGTAATTGAAATATGCTTTAGATGAATTAGGCAGACCCAAATATATGCAAAGGTTTTTTCTATTTTTTTTTTTTTAAATTTTTGTTCTTACCCTTGTTTTACCTAGAATGGGGATGGGGAGAATACATGGCACAATAATAA	1	chrIV_851053_A_C	3	1	0	firstTileUTR	TRUE
firstTileUTR_01335	YDR197W_5UTR_0	YDR197W_5UTR	chrIV	851195	+	GGCGCGCCGGTTGTAATTGAAATATGCTTTAGATGAATTAGGCAGACCCAAATATATGCAAAGGTTTTTTCTATTTTTTTTTTTTTAAATTTTTGTTCTTACCCTTGTTTTACCTAGAATGGGGATGGGGAGAATACATGGCACAATAAGAA	1	chrIV_851053_A_C	3	2	0	firstTileUTR	TRUE
firstTileUTR_01336	YDR208W_5UTR_0	YDR208W_5UTR	chrIV	868100	+	GGCGCGCCGTTTTTTCTTTGCTTGTCCCTCCGTATTTGCTTCTTTGTTGTCACGCTTTTGTTATTTCCACCTCTATCTTTCCTCTCTGTCCCATTCCCCATCCATTCCTTTCTTTTTTTTTTTAACCTGTGTTTTGTTTTCCCAGAATGGGC	3	chrIV_867984_TA_T;chrIV_867989_A_G;chrIV_868027_G_A	29;34;72	111	0	firstTileUTR	TRUE
firstTileUTR_01337	YDR208W_5UTR_0	YDR208W_5UTR	chrIV	868100	+	GGCGCGCCGTTTTTTCTTTGCTTGTCCCTCCGTATTTGCTTCTTTGTTGTCACGCTTTTGTTATTTCCACCTCTATCTTTCCTCTCTGTCCCATTCCCCATCCATTCCTTTCTTTTTTTTTTAACCTGTGTTTTGTTTTCCCAGAATGGGC	3	chrIV_867984_TA_T;chrIV_867989_A_G;chrIV_868027_G_A	29;34;72	211	0	firstTileUTR	TRUE
firstTileUTR_01338	YDR208W_5UTR_0	YDR208W_5UTR	chrIV	868100	+	GGCGCGCCGTTTTTTCTTTGCTTGTCCCTCCGTATTTGCTTCTTTGTTGTCACGCTTTTGTTATTTCCACCTCTATCTTTCCTCTCTGTCCCATTCCCCATCCATTCCTTTCTTTTTTCTTTTAACCTGTGTTTTGTTTTCCCAGAATGGGC	3	chrIV_867984_TA_T;chrIV_867989_A_G;chrIV_868027_G_A	29;34;72	121	0	firstTileUTR	TRUE
firstTileUTR_01339	YDR208W_5UTR_0	YDR208W_5UTR	chrIV	868100	+	GGCGCGCCGTTTTTTCTTTGCTTGTCCCTCCGTATTTGCTTCTTTGTTGTCACGCTTTTGTTATTTCCACCTCTATCTTTTCTCTCTGTCCCATTCCCCATCCATTCCTTTCTTTTTTTTTTTAACCTGTGTTTTGTTTTCCCAGAATGGGC	3	chrIV_867984_TA_T;chrIV_867989_A_G;chrIV_868027_G_A	29;34;72	112	0	firstTileUTR	TRUE
firstTileUTR_01340	YDR208W_5UTR_0	YDR208W_5UTR	chrIV	868100	+	GGCGCGCCGTTTTTTCTTTGCTTGTCCCTCCGTATTTGCTTCTTTGTTGTCACGCTTTTGTTATTTCCACCTCTATCTTTTCTCTCTGTCCCATTCCCCATCCATTCCTTTCTTTTTTCTTTAACCTGTGTTTTGTTTTCCCAGAATGGGC	3	chrIV_867984_TA_T;chrIV_867989_A_G;chrIV_868027_G_A	29;34;72	222	0	firstTileUTR	TRUE
firstTileUTR_01341	YDR210W_5UTR_0	YDR210W_5UTR	chrIV	871066	+	GGCGCGCCGCTCTTTTGACTTGTTTCGAAGACGGATAGTCTCCCTTTGCCTTTCTTTATTTTTATTCTGGCACTTTAGTTTATATAACGTTGCAGTTCACCATCGGCCTCGAGCAAAAAAAAACAGTAGAAGGCAAAGCAAAGTAAACAGGC	2	chrIV_870950_G_GT;chrIV_871042_G_T	29;121	11	0	firstTileUTR	TRUE
firstTileUTR_01342	YDR210W_5UTR_0	YDR210W_5UTR	chrIV	871066	+	GGCGCGCCGCTCTTTTGACTTGTTTCGAAGACGGATAGTCTCCCTTTGCCTTTCTTTATTTTTATTCTGGCACTTTAGTTTATATAACGTTGCAGTTCACCATCGGCCTCGAGCAAAAAAAAAACAGTAGAAGGCAAAGCAAAGTAAACAGGC	2	chrIV_870950_G_GT;chrIV_871042_G_T	29;121	21	0	firstTileUTR	TRUE
firstTileUTR_01343	YDR210W_5UTR_0	YDR210W_5UTR	chrIV	871066	+	GGCGCGCCGCTCTTTTGACTTGTTTCGAAGAAGGATAGTCTCCCTTTGCCTTTCTTTATTTTTATTCTGGCACTTTAGTTTATATAACGTTGCAGTTCACCATCGGCCTCGAGCAAAAAAAAACAGTAGAAGGCAAAGCAAAGTAAACAGGC	2	chrIV_870950_G_GT;chrIV_871042_G_T	29;121	12	0	firstTileUTR	TRUE
firstTileUTR_01344	YDR210W_5UTR_0	YDR210W_5UTR	chrIV	871066	+	GGCGCGCCGCTCTTTTGACTTGTTTCGAAGAAGGATAGTCTCCCTTTGCCTTTCTTTATTTTTATTCTGGCACTTTAGTTTATATAACGTTGCAGTTCACCATCGGCCTCGAGCAAAAAAAAAACAGTAGAAGGCAAAGCAAAGTAAACAGGC	2	chrIV_870950_G_GT;chrIV_871042_G_T	29;121	22	0	firstTileUTR	TRUE
firstTileUTR_01345	YDR212W_5UTR_0	YDR212W_5UTR	chrIV	887167	+	GGCGCGCCAGTGGCCTCTCTTTTGCTTAAGTTATTTACTCTTCATGTGATACCACCGCATTTCAATTTTTTTTTTTTTCAGTTCTTTGCCACTTAGGACAAGGTCCCTCGGCAAGTGAAAAAAAAAAATCTGAGATTATTATTTCAGTAGTA	2	chrIV_887044_A_G;chrIV_887046_AT_A	22;24	11	0	firstTileUTR	TRUE
firstTileUTR_01346	YDR212W_5UTR_0	YDR212W_5UTR	chrIV	887167	+	GGCGCGCCAGTGGCCTCTCTTTTGCTTAAGTTATTTACTCTTCATGTGATACCACCGCATTTCAATTTTTTTTTTTTTCAGTTCTTTGCCACTTAGGACAAGGTCCCTCGGCAAGTGAAAAAAAAAAATCCGAGATTATTATTTCAGTAGTA	2	chrIV_887044_A_G;chrIV_887046_AT_A	22;24	21	0	firstTileUTR	TRUE
firstTileUTR_01347	YDR212W_5UTR_0	YDR212W_5UTR	chrIV	887167	+	GGCGCGCCAGTGGCCTCTCTTTTGCTTAAGTTATTTACTCTTCATGTGATACCACCGCATTTCAATTTTTTTTTTTTTCAGTTCTTTGCCACTTAGGACAAGGTCCCTCGGCAAGTGAAAAAAAAAATCTGAGATTATTATTTCAGTAGTA	2	chrIV_887044_A_G;chrIV_887046_AT_A	22;24	12	0	firstTileUTR	TRUE
firstTileUTR_01348	YDR212W_5UTR_0	YDR212W_5UTR	chrIV	887167	+	GGCGCGCCAGTGGCCTCTCTTTTGCTTAAGTTATTTACTCTTCATGTGATACCACCGCATTTCAATTTTTTTTTTTTTCAGTTCTTTGCCACTTAGGACAAGGTCCCTCGGCAAGTGAAAAAAAAAATCCGAGATTATTATTTCAGTAGTA	2	chrIV_887044_A_G;chrIV_887046_AT_A	22;24	22	0	firstTileUTR	TRUE
firstTileUTR_01349	YDR223W_5UTR_0	YDR223W_5UTR	chrIV	911983	+	GGCGCGCCACAATTATAGAGGGCTTTTGACTCATTAATCTTACTGGAACCATTGACAGATTAGTCCGAAGAAGAAAACTCTAAAAAATCCGCTAGTAAGATTCAACAAAAAAAAAGTCTGCTTGCTATGAAAGTCTGATTTCTAGAGTACAC	1	chrIV_911925_G_T	87	1	0	firstTileUTR	FALSE
firstTileUTR_01350	YDR223W_5UTR_0	YDR223W_5UTR	chrIV	911983	+	GGCGCGCCACAATTATAGAGGGCTTTTGACTCATTAATCTTACTGGAACCATTGACAGATTAGTCAGAAGAAGAAAACTCTAAAAAATCCGCTAGTAAGATTCAACAAAAAAAAAGTCTGCTTGCTATGAAAGTCTGATTTCTAGAGTACAC	1	chrIV_911925_G_T	87	2	0	firstTileUTR	FALSE
firstTileUTR_01351	YDR231C_5UTR_0	YDR231C_5UTR	chrIV	926935	-	GGCGCGCCGTTACGCACTGCTGTGGACTTCACTACAATGCTTTACCGAGCAGTGGAGTTTGATATAGTGGTGGTACCCCCGACGGTGCTATAATAAGCTTGCCTGCACGGCTTACCCTACCGCTCGGAAAGGCCGCCTTCGTCGCTCATTGG	1	chrIV_926985_T_C	95	1	0	firstTileUTR	TRUE
firstTileUTR_01352	YDR231C_5UTR_0	YDR231C_5UTR	chrIV	926935	-	GGCGCGCCGTTACGCACTGCTGTGGACTTCACTACAATGCTTTACCGAGCAGTGGAGCTTGATATAGTGGTGGTACCCCCGACGGTGCTATAATAAGCTTGCCTGCACGGCTTACCCTACCGCTCGGAAAGGCCGCCTTCGTCGCTCATTGG	1	chrIV_926985_T_C	95	2	0	firstTileUTR	TRUE
firstTileUTR_01353	YDR232W_5UTR_0	YDR232W_5UTR	chrIV	927201	+	GGCGCGCCGCAAACGTTGTATTTCTAACAACGCATGGATCAGAACAATGGGCAAGGCAAGATGAAAAATTTCCGTTCCTGCTCTTTCTTCATATATGAACAATGACCAAAAAGCGCCCGCGGCCGCAGACCAATGAGCGACGAAGGCGGCCT	1	chrIV_927194_C_A	138	1	0	firstTileUTR	FALSE
firstTileUTR_01354	YDR232W_5UTR_0	YDR232W_5UTR	chrIV	927201	+	GGCGCGCCGCAAACTTTGTATTTCTAACAACGCATGGATCAGAACAATGGGCAAGGCAAGATGAAAAATTTCCGTTCCTGCTCTTTCTTCATATATGAACAATGACCAAAAAGCGCCCGCGGCCGCAGACCAATGAGCGACGAAGGCGGCCT	1	chrIV_927194_C_A	138	2	0	firstTileUTR	FALSE
firstTileUTR_01355	YDR234W_5UTR_0	YDR234W_5UTR	chrIV	931102	+	GGCGCGCCGCAAGTTCTATTTTATTGAAAAAGTGATATTGTCTACTATAAGAGGCAGCGCAAAACTAGCTATTGCACACACAAACACACGAGGATTCTTTTGTATATATAAATACCTATGGGGATATATATATATATATATATATGTGCGTG	1	chrIV_930964_CATATATATAT_CAT	7	1	0	firstTileUTR	FALSE
firstTileUTR_01356	YDR234W_5UTR_0	YDR234W_5UTR	chrIV	931102	+	GGCGCGCCGCAAGTTCTATTTTATTGAAAAAGTGATATTGTCTACTATAAGAGGCAGCGCAAAACTAGCTATTGCACACACAAACACACGAGGATTCTTTTGTATATATAAATACCTATGGGGATATATATATATATGTGCGTG	1	chrIV_930964_CATATATATAT_CAT	7	2	0	firstTileUTR	FALSE
firstTileUTR_01357	YDR236C_5UTR_0	YDR236C_5UTR	chrIV	935917	-	GGCGCGCCGACCGCTTCACGGGTCCAAATTACCACTTTCTAGAACATTGTCTTGTACGTCCAATAATAGTGTTACCAATGCTGACAGAGTATTAAAGCAACGATTTGAATTGACGCATTACCCTCCTGCATAAAGGACTACAAATACATCCT	1	chrIV_935955_A_T	107	1	0	firstTileUTR	FALSE
firstTileUTR_01358	YDR236C_5UTR_0	YDR236C_5UTR	chrIV	935917	-	GGCGCGCCGACCGCTTCACGGGTCCAAATTACCACTTTCTAGAACTTTGTCTTGTACGTCCAATAATAGTGTTACCAATGCTGACAGAGTATTAAAGCAACGATTTGAATTGACGCATTACCCTCCTGCATAAAGGACTACAAATACATCCT	1	chrIV_935955_A_T	107	2	0	firstTileUTR	FALSE
firstTileUTR_01359	YDR238C_5UTR_0	YDR238C_5UTR	chrIV	940845	-	GGCGCGCCGATTACTTTTGTTTATTCTCAAGGCAATCTTAACTGAGTCTTAATGAACGTCAAATTTCACTTGTCGAGCTGTTGTTTTCTGATTTCTTTCTACGTGTAGCGAGTACACGGAAAGAAAAAAAAAACGAAGTGATAAGCTGGGTA	1	chrIV_940972_G_C	18	1	0	firstTileUTR	TRUE
firstTileUTR_01360	YDR238C_5UTR_0	YDR238C_5UTR	chrIV	940845	-	GGCGCGCCGATTACTTTTGTTTATTCTCAAGGCAATCTTAACTGAGTCTTAATGAACGTCAAATTTCACTTGTCGAGCTGTTGTTTTCTGATTTCTTTCTACGTGTAGCGAGTACACGGAAAGAAAAAAAAAACCAAGTGATAAGCTGGGTA	1	chrIV_940972_G_C	18	2	0	firstTileUTR	TRUE
firstTileUTR_01361	YDR247W_5UTR_0	YDR247W_5UTR	chrIV	955644	+	GGCGCGCCGAGGTACGTTTTAGGCTCCAGTATAAACAAAAGGGCACCAACGTCAACATGTATAAATAATAATAAATAAATCGGCGAAAACGTTCCAACGTGCGGCCGCTGCTTGGCAAATTAACTGGACGGGGTTAAGTGGCAAGCCGCGCG	1	chrIV_955620_A_C	121	1	0	firstTileUTR	FALSE
firstTileUTR_01362	YDR247W_5UTR_0	YDR247W_5UTR	chrIV	955644	+	GGCGCGCCGAGGTACGTTTTAGGCTCCAGTAGAAACAAAAGGGCACCAACGTCAACATGTATAAATAATAATAAATAAATCGGCGAAAACGTTCCAACGTGCGGCCGCTGCTTGGCAAATTAACTGGACGGGGTTAAGTGGCAAGCCGCGCG	1	chrIV_955620_A_C	121	2	0	firstTileUTR	FALSE
firstTileUTR_01363	YDR252W_5UTR_0	YDR252W_5UTR	chrIV	963404	+	GGCGCGCCGTAGGATTATGTAGTAGTTTATTTAATTTAGCCGTATTTATTTCTATCAGGGAACCTTTTTAACGCAACTTAATTGTTTCTGTCACAGCGGGAAAAAAAGAAAAAAACAAAACAAAGCATTTAAAAGCATATGCCGTTTATTAC	1	chrIV_963291_G_A	32	1	0	firstTileUTR	FALSE
firstTileUTR_01364	YDR252W_5UTR_0	YDR252W_5UTR	chrIV	963404	+	GGCGCGCCGTAGGATTATGTAGTAGTTTATTTAATTTAGCCGTATTTATTTCTATCAGGGAACCTTTTTAACGCAACTTAATTGTTTCTGTCACAGCGGGAAAAAAAGAAAAAAACAAAATAAAGCATTTAAAAGCATATGCCGTTTATTAC	1	chrIV_963291_G_A	32	2	0	firstTileUTR	FALSE
firstTileUTR_01365	YDR254W_5UTR_0	YDR254W_5UTR	chrIV	965041	+	GGCGCGCCGCTTTCTATGCTTCTAATCTTTTACCATTTACCTTTGTTTATTTCAATATAAACTTTAATTTACAGTCCCTATCTATTGCCCGACTGGACTAACATGCACGTGACATTTTGTGATGGTTTTTCGTCCCTTACTTAGTACGCTTA	2	chrIV_964930_C_A;chrIV_964950_A_G	34;54	11	0	firstTileUTR	TRUE
firstTileUTR_01366	YDR254W_5UTR_0	YDR254W_5UTR	chrIV	965041	+	GGCGCGCCGCTTTCTATGCTTCTAATCTTTTACCATTTACCTTTGTTTATTTCAATATAAACTTTAATTTACAGTCCCTATCTATTGCCCGACTGGACTAACATGCACGTGACATTTTTTGATGGTTTTTCGTCCCTTACTTAGTACGCTTA	2	chrIV_964930_C_A;chrIV_964950_A_G	34;54	21	0	firstTileUTR	TRUE
firstTileUTR_01367	YDR254W_5UTR_0	YDR254W_5UTR	chrIV	965041	+	GGCGCGCCGCTTTCTATGCTTCTAATCTTTTACCATTTACCTTTGTTTATTTCAATATAAACTTTAATTTACAGTCCCTATCTATTGCCCGACTGGACCAACATGCACGTGACATTTTGTGATGGTTTTTCGTCCCTTACTTAGTACGCTTA	2	chrIV_964930_C_A;chrIV_964950_A_G	34;54	12	0	firstTileUTR	TRUE
firstTileUTR_01368	YDR254W_5UTR_0	YDR254W_5UTR	chrIV	965041	+	GGCGCGCCGCTTTCTATGCTTCTAATCTTTTACCATTTACCTTTGTTTATTTCAATATAAACTTTAATTTACAGTCCCTATCTATTGCCCGACTGGACCAACATGCACGTGACATTTTTTGATGGTTTTTCGTCCCTTACTTAGTACGCTTA	2	chrIV_964930_C_A;chrIV_964950_A_G	34;54	22	0	firstTileUTR	TRUE
firstTileUTR_01369	YDR259C_5UTR_0	YDR259C_5UTR	chrIV	976237	-	GGCGCGCCACTATGTTTAAAATTACAAAGAAAGCATAATCTTGAACAAAGTTTCTACCCTTCGGCATAATGCAAAGGGGCATTAGCTAAAAAAACAAAAACGGGTACGCTCTTTCTTAAATTCGCTATTACAATTCCGCAGATGCAGCAAGC	2	chrIV_976264_A_G;chrIV_976271_T_C	118;111	11	0	firstTileUTR	FALSE
firstTileUTR_01370	YDR259C_5UTR_0	YDR259C_5UTR	chrIV	976237	-	GGCGCGCCACTATGTTTAAAATTACAAAGAAAGCGTAATCTTGAACAAAGTTTCTACCCTTCGGCATAATGCAAAGGGGCATTAGCTAAAAAAACAAAAACGGGTACGCTCTTTCTTAAATTCGCTATTACAATTCCGCAGATGCAGCAAGC	2	chrIV_976264_A_G;chrIV_976271_T_C	118;111	21	0	firstTileUTR	FALSE
firstTileUTR_01371	YDR259C_5UTR_0	YDR259C_5UTR	chrIV	976237	-	GGCGCGCCACTATGTTTAAAATTACAAAGAAAGCATAATCTCGAACAAAGTTTCTACCCTTCGGCATAATGCAAAGGGGCATTAGCTAAAAAAACAAAAACGGGTACGCTCTTTCTTAAATTCGCTATTACAATTCCGCAGATGCAGCAAGC	2	chrIV_976264_A_G;chrIV_976271_T_C	118;111	12	0	firstTileUTR	FALSE
[truncated: 15,722 more rows]
