# Supplementary material for: Massively parallel identification of causal variants underlying gene expression differences in a yeast cross
Source: bioRxiv preprint, doi:10.1101/2020.08.31.276337, version 1 (2020-08-31)
Supplement: Table S3 [file 276337_file05.xls]

## Sheet: TSS
oligoID	DNA_TSS_2016_1	DNA_TSS_2016_2	DNA_TSS_2016_3	DNA_TSS_2016_4	DNA_TSS_2016_5	DNA_TSS_2016_6	DNA_TSS_2016_A1	DNA_TSS_2016_A2	DNA_TSS_2016_B1	DNA_TSS_2016_B2	DNA_TSS_2017_A	DNA_TSS_2017_B	DNA_TSS_2018_A	DNA_TSS_2018_B	RNA_TSS_2016_1	RNA_TSS_2016_2	RNA_TSS_2016_3	RNA_TSS_2016_4	RNA_TSS_2016_5	RNA_TSS_2016_6	RNA_TSS_2016_A1	RNA_TSS_2016_A2	RNA_TSS_2016_B1	RNA_TSS_2016_B2	RNA_TSS_2017_A	RNA_TSS_2017_B	RNA_TSS_2018_A	RNA_TSS_2018_B
firstTileUTR_00008	0	0	0	0	0	0	0	0	0	0	0	0			0	0	0	0	0	0	0	0	0	0	0	1	4	0
firstTileUTR_00009	0	0	0	0	0	0	0	0	0	0	1	1			0	0	0	0	0	0	0	0	0	0	0	2	0	3
firstTileUTR_00010	0	0	0	0	0	0	0	0	0	0	9	8			0	0	0	0	0	0	19	41	1	6	15	7	31	19
firstTileUTR_00011	0	0	0	0	0	0	0	0	0	0	0	0			0	0	0	0	0	0	0	0	0	0	0	0	0	1
firstTileUTR_00012	549	887	1201	477	782	966	279	344	360	544	441	491			566	621	269	314	262	257	422	561	419	444	445	252	804	688
firstTileUTR_00013	633	1343	1108	948	1367	790	494	442	524	395	447	462			713	651	647	127	497	164	602	482	413	399	421	272	713	653
firstTileUTR_00014	6731	10363	8963	8987	7865	6690	4328	3554	3859	4416	3512	3604			4433	3123	2336	4700	4008	1215	3963	3754	4533	4818	2516	1605	4196	3594
firstTileUTR_00015	8224	13742	11563	9989	9975	10914	4513	5684	4775	5940	4845	5096			5200	4500	4642	4349	5151	1868	5024	5215	5737	5453	3431	2295	6028	5242
firstTileUTR_00016	8408	14032	12539	9714	11778	9940	5754	6630	4606	5192	4505	4839			5823	4879	3408	3877	5360	2332	4968	5384	6249	5787	3209	2104	5658	4951
firstTileUTR_00017	7524	12318	13341	10480	9931	8494	4794	5146	4351	4964	4115	4469			5422	3970	3530	3835	4902	1752	4728	4400	4940	4943	2745	1788	4855	4287
firstTileUTR_00018	5677	10112	9962	6176	7104	5742	3293	3584	3367	3004	3261	3367			4769	2947	2817	3430	3361	1525	3235	3190	4181	3953	2338	1412	4215	3382
firstTileUTR_00019	9260	17006	14993	14357	11892	12351	5852	6929	4947	5892	5309	5686			6463	5533	4980	6744	7289	2799	6322	6468	7089	6791	3957	2483	7054	5856
firstTileUTR_00020	6158	9376	9246	6853	8056	8349	3741	4498	3886	3855	3431	3800			6678	5757	4937	5204	7644	1091	7241	7360	7249	7299	4210	2592	7915	7042
firstTileUTR_00021	6027	10940	10620	9196	8196	7642	3936	5379	3851	4097	3648	3988			5872	6219	6404	5558	8292	2419	8475	9029	8286	7707	4776	2699	8757	7395
firstTileUTR_00022	6266	10243	9295	7750	8941	7773	3134	4139	3568	3662	3336	3636			6732	5531	5363	5429	8187	2568	7634	7635	7059	7315	4405	2563	8576	7307
firstTileUTR_00023	6601	11274	9779	8254	8869	7635	3346	4332	3364	3960	3311	3803			6568	8429	7182	6171	8177	2256	7350	7799	7631	7240	4502	2660	8545	7571
firstTileUTR_00024	8637	15204	13576	8964	11238	9980	5104	5121	5035	5246	4405	4786			6370	5297	4414	4490	7166	2592	6188	6609	7123	7015	3206	2209	6945	6030
firstTileUTR_00025	6161	10224	7359	5589	7671	6038	3475	3895	2806	3513	2656	3028			3855	4674	4099	3072	4436	1898	4426	4888	4588	4305	2327	1536	4953	4451
firstTileUTR_00026	755	975	1204	386	1401	991	404	485	540	429	372	381			321	135	225	46	394	36	388	336	443	409	178	123	370	347
firstTileUTR_00027	684	1343	661	474	837	738	527	360	113	252	330	385			503	166	237	211	390	0	337	406	237	203	171	125	419	279
firstTileUTR_00028	2108	5091	3058	2732	2679	2651	1786	1919	1490	1521	1257	1425			1782	1840	1614	1083	1924	241	2332	2250	2097	2159	1147	830	2787	2366
firstTileUTR_00029	2033	3820	3955	1987	3647	2221	1304	1291	1171	1291	1350	1481			2389	2431	1798	1245	2031	1023	1738	1892	1880	2071	1225	859	2920	2514
firstTileUTR_00030	1809	2136	2428	1718	1827	1027	821	752	738	1189	828	882			2872	1967	2232	1688	2627	852	2733	2644	2285	2352	1680	986	3947	3319
firstTileUTR_00031	608	1095	1472	892	1457	1063	297	489	315	467	399	418			800	784	625	775	1257	308	1422	1282	934	884	834	532	2021	1557
firstTileUTR_00032	980	1827	1907	1119	895	1709	742	561	799	555	482	550			364	1168	492	786	691	282	611	719	711	875	386	267	654	647
firstTileUTR_00033	1315	2233	1522	1310	2100	1203	696	1134	414	1130	714	847			956	2073	916	682	1187	373	1080	1170	1242	1193	688	430	1353	1173
firstTileUTR_00034	1087	2558	1778	1725	1622	1185	826	710	769	902	809	820			640	1143	1141	675	1213	80	1007	1150	1126	1179	545	388	998	897
firstTileUTR_00035	1092	2193	1325	1504	1463	1803	735	814	712	719	637	654			978	643	480	549	837	444	841	864	959	990	533	302	868	775
firstTileUTR_00036	3170	5326	5496	3801	3716	3376	1923	1652	1417	1871	1483	1782			2903	2407	1645	2414	2952	843	2698	2481	2670	2349	1266	808	2329	2025
firstTileUTR_00037	1162	1810	1809	1044	1567	1752	1037	796	658	568	615	626			980	495	424	1078	660	356	791	830	848	952	401	292	819	664
firstTileUTR_00038	1436	2475	2206	1306	2194	1651	1057	1213	719	739	723	800			486	631	896	602	1023	432	1111	1018	851	892	521	374	883	743
firstTileUTR_00039	361	716	657	395	330	851	229	267	162	208	142	135			271	847	319	422	866	205	605	640	449	609	316	153	551	525
firstTileUTR_00040	240	147	455	259	104	234	103	266	172	141	54	68			374	370	351	77	174	93	514	510	422	308	153	61	231	176
firstTileUTR_00041	131	215	114	267	63	218	25	19	56	123	62	88			424	209	0	418	187	7	229	257	328	235	129	81	262	247
firstTileUTR_00042	141	84	195	371	79	152	115	73	91	43	114	103			251	98	248	229	98	166	245	252	265	222	201	108	325	304
firstTileUTR_00043	133	149	271	92	136	103	158	159	21	40	33	35			510	125	16	237	700	87	577	465	512	542	130	64	279	281
firstTileUTR_00044	73	125	259	196	7	134	108	65	146	85	40	64			532	506	220	655	848	558	563	721	567	526	172	117	307	232
firstTileUTR_00045	24	35	41	52	0	0	1	55	92	77	17	41			0	6	42	139	112	130	310	308	221	319	135	73	240	247
firstTileUTR_00046	43	0	0	0	89	0	22	47	114	20	31	20			50	262	107	38	110	0	351	423	146	162	133	57	146	127
firstTileUTR_00047	0	100	186	0	30	0	32	22	27	32	49	42			0	89	175	54	252	0	91	70	120	129	215	107	302	271
firstTileUTR_00048	193	1077	385	358	691	519	102	199	279	227	132	165			201	701	377	138	235	90	739	606	407	415	244	136	515	435
firstTileUTR_00049	253	212	259	298	454	297	172	18	224	169	139	154			602	272	218	407	448	0	427	530	387	405	221	134	518	456
firstTileUTR_00050	121	40	70	111	117	149	31	48	31	51	34	28			0	0	56	335	49	0	64	94	112	78	70	37	112	102
firstTileUTR_00051	106	159	91	54	74	92	0	31	0	22	18	15			162	154	148	73	56	38	61	89	81	116	74	27	132	58
firstTileUTR_00052	0	0	0	0	0	35	0	0	26	0	12	24			136	0	0	0	0	0	42	68	4	18	27	28	91	77
firstTileUTR_00053	32	0	37	261	22	0	31	18	17	17	10	11			105	162	59	0	9	0	125	132	88	50	23	8	58	61
firstTileUTR_00054	33	29	26	0	11	0	0	58	37	45	16	27			0	63	153	0	10	27	122	88	51	41	26	13	73	46
firstTileUTR_00055	678	827	543	392	703	837	220	384	419	261	361	412			830	1844	1667	1341	2081	604	2355	2634	1643	1674	1269	790	2567	2218
firstTileUTR_00056	425	731	746	631	312	586	189	540	335	316	256	265			1198	1729	1703	644	1043	461	2099	1959	1793	1666	989	569	1680	1548
firstTileUTR_00057	587	1420	1089	841	571	629	258	605	470	561	386	381			2037	2241	2701	2322	2150	669	2456	2623	2517	2327	1589	894	3056	2563
firstTileUTR_00058	276	729	601	458	381	373	231	251	131	188	243	389			1415	1724	1313	1818	1441	203	1512	1645	1366	1293	1073	700	2253	1993
firstTileUTR_00059	2015	3385	2485	2686	2248	2088	1114	1324	1215	1086	1182	1382			2073	2596	1957	1701	2752	720	3213	3263	2877	2849	2031	1210	3976	3209
firstTileUTR_00060	3179	5806	5343	4740	4565	3167	1926	1825	1433	1868	1667	1927			3872	4159	3688	4135	4057	1115	4817	4770	3938	3862	2598	1625	5234	4529
firstTileUTR_00061	624	836	625	315	712	613	176	210	135	330	238	311			727	391	136	57	446	341	241	259	297	273	228	154	424	345
firstTileUTR_00062	283	235	459	486	225	392	110	65	83	121	144	162			86	91	192	232	355	27	205	266	137	166	166	73	278	226
firstTileUTR_00063	1121	3108	3003	1898	2200	2368	1189	1164	803	1140	876	937			2320	2371	2591	2654	2775	945	2962	2928	2845	3148	1464	830	2852	2574
firstTileUTR_00064	834	830	629	682	1063	737	620	377	248	413	436	450			996	232	1048	723	842	403	937	1083	733	766	751	382	1348	1159
firstTileUTR_00065	3135	4622	4880	3666	4200	3160	1969	2399	1898	2109	1881	2326			2173	1659	1731	2083	1342	642	2020	2051	1867	1856	1194	761	2321	2033
firstTileUTR_00066	3366	5664	4543	3759	5047	4770	2108	2606	1847	1916	1719	1993			1727	2308	1953	1904	1994	481	1827	1947	2052	1809	1024	710	2057	1711
firstTileUTR_00067	10	57	0	0	116	0	0	2	0	0	10	14			0	126	0	0	48	0	25	7	25	4	9	5	9	9
firstTileUTR_00068	150	138	166	267	34	69	80	67	0	29	27	26			64	0	129	0	18	0	40	62	34	84	18	6	22	17
firstTileUTR_00069	7510	12673	9175	7100	9550	6947	3689	3542	4038	3337	3884	4287			24815	24138	18473	17036	24883	6635	30145	31641	21193	20282	16213	8784	30231	26240
firstTileUTR_00070	4278	8643	8300	4425	6443	5866	3236	3254	2751	3646	2780	3165			16996	18842	19169	9945	20402	6326	27198	28342	18470	18303	12327	7056	23265	20198
firstTileUTR_00071	3283	4885	5563	4295	4327	3831	1694	1778	1550	2015	1814	1844			2248	2472	2367	2256	2794	1084	3413	3766	3081	2990	1871	1136	3563	2903
firstTileUTR_00072	140	71	169	0	36	64	22	71	33	24	2	1			89	0	203	0	13	0	29	41	55	42	4	1	13	2
firstTileUTR_00073	0	1	0	56	0	0	0	0	0	0	4	1			0	33	0	0	5	0	1	6	0	0	2	0	3	0
firstTileUTR_00075	687	860	580	585	734	554	236	262	317	395	224	255			394	508	607	1061	454	304	604	672	486	529	378	214	730	520
firstTileUTR_00076	1443	2126	2001	1110	1871	1466	913	744	859	917	486	552			1320	1313	1411	1653	1435	331	2184	2668	1835	2030	774	427	1318	1063
firstTileUTR_00078	0	30	0	0	0	0	0	0	0	0	0	2			0	19	0	0	0	0	0	0	1	7	0	0	0	0
firstTileUTR_00079	178	175	164	179	39	38	90	33	17	104	66	62			113	0	0	118	30	66	158	125	102	133	59	38	116	106
firstTileUTR_00080	83	234	47	176	200	1	63	56	169	48	42	52			0	70	125	0	121	0	134	86	102	99	45	22	91	86
firstTileUTR_00081	20	268	138	181	14	123	0	74	39	100	43	37			0	95	0	0	28	7	71	143	59	88	35	25	74	85
firstTileUTR_00082	0	47	43	0	0	0	32	0	19	12	42	33			0	32	38	0	1	43	32	23	7	9	39	16	91	57
firstTileUTR_00083	48	134	66	81	71	30	50	35	22	103	47	43			1	95	219	85	63	0	116	164	124	144	72	37	104	92
firstTileUTR_00084	0	0	0	0	96	0	26	0	0	0	10	16			0	0	0	0	14	0	5	5	3	0	13	11	38	21
firstTileUTR_00085	11	54	0	200	42	26	45	74	0	0	25	26			0	28	0	0	58	0	35	52	20	47	14	20	27	30
firstTileUTR_00086	279	150	498	527	178	101	197	145	137	137	190	204			44	105	98	123	231	1	258	201	153	163	166	119	406	348
firstTileUTR_00087	90	142	56	29	209	31	152	128	97	97	98	72			57	41	0	0	139	50	126	69	74	40	93	78	201	168
firstTileUTR_00088	79	130	65	27	74	35	0	60	38	23	42	39			2	128	31	0	75	0	169	196	44	41	75	40	114	90
firstTileUTR_00089	101	421	373	159	516	391	114	46	173	123	190	197			3	265	412	225	379	48	295	333	279	295	245	158	498	383
firstTileUTR_00092	0	42	239	67	124	157	0	29	0	25	33	22			0	112	22	364	133	0	173	219	190	179	146	62	163	177
firstTileUTR_00094	47	632	367	152	147	81	62	9	74	100	48	62			354	378	492	153	514	97	434	455	435	318	223	133	449	327
firstTileUTR_00096	0	0	0	0	0	0	0	0	0	0	3	4			0	0	0	0	0	0	0	0	0	0	7	7	22	26
firstTileUTR_00097	101	61	118	0	33	50	51	5	15	19	8	13			67	35	129	0	117	0	49	66	135	152	20	12	70	36
firstTileUTR_00098	0	0	19	0	0	0	0	0	0	8	4	2			0	110	0	0	0	0	58	69	25	13	10	3	9	3
firstTileUTR_00099	0	0	0	0	0	28	0	0	0	0	5	2			0	3	0	0	30	0	0	0	63	45	6	5	19	14
firstTileUTR_00100	36	0	0	19	0	0	0	0	40	0	3	6			0	92	82	44	0	0	10	19	43	22	8	1	20	6
firstTileUTR_00101	172	437	395	332	414	233	152	244	95	165	175	196			117	180	355	70	446	192	382	439	274	240	234	145	498	481
firstTileUTR_00102	297	879	712	316	449	243	137	84	106	73	190	185			209	318	144	0	309	225	305	322	241	254	215	112	416	397
firstTileUTR_00103	331	541	331	487	344	135	236	191	130	169	131	160			339	429	482	452	210	179	312	336	380	346	180	89	300	273
firstTileUTR_00104	169	827	472	362	386	510	152	17	192	259	161	165			364	610	280	172	214	45	412	527	377	394	165	106	472	337
firstTileUTR_00105	18358	33278	26758	22250	22823	19545	11240	11938	9745	10924	10964	11424			21007	15913	13619	13676	17995	6082	20695	21204	19868	19626	12647	8134	24915	20916
firstTileUTR_00106	20117	31769	33857	25242	26204	22393	12116	13681	11332	11470	12008	12940			21647	17686	17253	15616	22873	7202	22752	23559	22648	21652	13929	9131	27102	23434
firstTileUTR_00107	18477	31778	29762	22775	23932	21619	10883	12605	11781	10823	11210	12177			17834	16474	14891	13792	20759	6983	19411	21002	19860	19934	13109	8663	25816	22278
firstTileUTR_00108	16541	30858	25844	20558	22490	18838	9288	11635	8713	9084	10327	10917			14416	16260	12449	12251	18475	6584	17901	19111	17832	16871	11642	7940	23359	20182
firstTileUTR_00109	0	30	0	0	21	108	115	0	24	53	11	13			0	1	0	0	0	0	16	30	22	14	9	13	16	39
firstTileUTR_00110	6	109	0	34	0	0	0	13	0	13	26	16			68	17	0	0	8	0	10	31	41	13	12	9	16	36
firstTileUTR_00111	27	0	95	71	0	0	0	0	0	0	25	16			0	0	0	23	10	47	21	0	0	18	9	5	20	21
firstTileUTR_00112	0	0	30	207	0	35	2	52	0	13	13	29			55	0	0	0	0	26	17	24	29	21	9	9	18	24
firstTileUTR_00113	268	607	312	274	221	292	76	54	230	36	95	87			239	287	225	165	158	46	203	115	134	104	72	38	110	84
firstTileUTR_00114	135	162	0	147	143	97	77	6	110	52	36	59			653	233	109	211	191	104	194	267	209	278	197	75	303	261
firstTileUTR_00115	19	30	25	21	0	31	16	7	0	0	4	1			0	31	0	0	15	0	22	23	5	0	16	3	48	31
firstTileUTR_00116	46	0	151	29	66	313	0	28	0	10	56	44			0	88	43	196	216	12	115	154	134	165	198	105	299	271
firstTileUTR_00118	0	0	12	28	0	1	0	39	0	24	27	13			22	0	0	68	74	79	58	57	69	106	70	24	97	50
firstTileUTR_00119	85	0	0	0	0	0	0	0	0	0	3	8			38	0	0	0	0	53	0	5	6	0	14	6	28	23
firstTileUTR_00120	15548	30244	25878	21001	22108	18387	9141	10553	8872	10093	9152	10920			23083	22212	19016	16339	23826	6742	24035	24892	23031	22099	13651	8684	26410	23487
firstTileUTR_00121	13878	24701	21864	16405	20446	16797	8070	8888	7218	9035	8027	9264			19754	18647	16257	13563	20516	6880	20488	21073	19071	19169	11494	7298	22262	20096
firstTileUTR_00122	5606	10941	8497	7014	7329	5657	3401	4025	3472	2651	3517	3991			3479	2925	3068	2804	3873	1874	4090	4153	4137	4182	2976	1941	5792	4939
firstTileUTR_00123	7263	13015	11349	9445	9335	8739	4796	4604	3679	4134	3944	4143			4533	5606	3372	6234	4529	2325	4987	5109	5517	5549	3427	2018	6195	5324
firstTileUTR_00124	8301	12377	13034	9689	10257	8559	4699	5399	3986	5177	4486	4750			5910	4157	4466	4138	5755	2136	5984	6138	6432	6471	3731	2316	6948	5846
firstTileUTR_00125	6470	10727	11110	7904	7236	8499	3731	4411	3495	3458	3367	3600			4832	3172	3006	3114	4249	1404	4475	4799	4514	4809	2939	1706	5373	4440
firstTileUTR_00126	5833	8762	8766	7707	6259	5642	2901	3918	3662	3300	3239	3485			4325	2928	2729	2840	3920	1682	3667	3577	4134	4355	2535	1539	4607	4078
firstTileUTR_00127	5108	10685	7169	6540	7847	6269	3807	4063	2808	3665	3396	3767			3286	4430	2643	2883	3883	1267	4131	4682	4282	4478	2809	1713	5137	4315
firstTileUTR_00128	5177	10665	7682	8289	7451	8050	3945	4059	2731	3151	3215	3482			4346	3201	2206	2644	3803	1802	3996	4132	4428	4331	2459	1603	4816	4004
firstTileUTR_00129	7210	13629	11157	10910	10311	8721	4113	5118	5247	4019	3959	4186			5307	5015	3311	4539	5630	1736	5493	6166	6197	6310	3415	2045	6404	5469
firstTileUTR_00130	4648	9189	8857	5682	6237	5332	2503	3253	3094	2940	2787	3231			4302	3415	2791	4608	3242	1027	3658	3895	3956	3745	2472	1480	4915	4015
firstTileUTR_00131	7237	11537	9312	8590	9307	7151	3773	4945	3769	4657	3498	3857			6346	4811	4031	4034	5547	1368	5697	5970	5772	5917	3374	2246	6755	5856
firstTileUTR_00132	7137	12425	10477	9812	9085	7640	4817	4542	4335	3796	3789	4075			5985	3604	3508	4698	5265	1908	5250	5240	5665	5563	3219	2199	6235	5283
firstTileUTR_00133	197	56	108	149	148	14	66	92	86	16	45	50			164	19	111	0	138	0	109	136	109	67	56	26	158	83
firstTileUTR_00134	1	79	0	24	86	28	13	3	20	40	17	16			0	209	58	81	43	0	25	42	25	23	17	11	21	26
firstTileUTR_00135	122	143	131	47	84	171	91	82	27	23	47	45			6	36	66	0	154	9	142	125	146	134	44	36	96	86
firstTileUTR_00136	63	184	594	55	36	201	0	0	76	41	41	79			103	103	288	264	115	0	93	116	76	72	46	27	76	64
firstTileUTR_00137	205	261	150	206	43	282	66	162	84	42	28	44			218	212	151	268	143	148	74	118	116	94	23	12	120	63
firstTileUTR_00138	22	184	313	84	114	0	139	31	92	21	17	31			25	143	170	0	81	0	31	69	44	46	15	13	60	27
firstTileUTR_00139	0	62	63	0	57	49	6	0	0	25	20	29			0	0	0	0	126	0	4	9	40	26	30	17	66	49
firstTileUTR_00140	73	201	135	91	58	31	45	39	133	160	28	47			1	9	286	312	70	0	88	76	158	195	37	22	61	42
firstTileUTR_00141	32	362	153	32	143	0	34	203	37	27	57	80			0	169	134	1	160	5	213	166	103	115	84	27	185	130
firstTileUTR_00142	82	143	80	129	373	199	19	22	24	34	60	56			122	73	10	172	190	143	79	119	97	187	72	47	160	124
firstTileUTR_00143	139	224	101	12	125	83	59	104	0	18	10	14			50	103	0	0	93	0	126	141	39	64	12	14	80	46
firstTileUTR_00144	43	229	93	41	24	48	59	28	104	56	56	71			15	0	0	312	46	112	84	100	98	86	76	53	143	108
firstTileUTR_00145	55	369	171	63	175	66	42	26	76	64	31	28			228	74	0	100	2	148	79	161	81	155	53	29	109	68
firstTileUTR_00146	120	268	160	0	43	46	42	89	8	73	15	32			237	144	63	0	79	1	72	96	88	95	24	12	58	48
firstTileUTR_00147	53	49	190	29	42	48	40	35	16	49	28	19			115	20	0	62	44	0	62	49	60	48	16	10	39	42
firstTileUTR_00148	0	0	0	0	36	64	22	0	0	0	2	10			0	0	0	0	0	0	27	33	0	2	2	5	7	3
firstTileUTR_00149	135	75	185	51	178	47	0	29	51	90	46	39			67	1	0	0	84	0	41	14	27	34	17	10	42	38
firstTileUTR_00150	13	38	0	0	48	54	0	0	18	1	42	52			0	0	16	0	10	0	9	22	19	16	34	18	44	37
firstTileUTR_00151	3010	5736	4881	3299	4061	4915	2095	2137	1725	2293	2011	2146			1997	1057	1146	1027	1501	1016	1278	1351	1837	1651	1148	839	1876	1592
firstTileUTR_00152	3116	5893	5399	3826	3632	3892	1860	1703	1653	1544	1816	1904			1013	1140	637	1285	1602	839	1413	1438	1677	1688	1036	791	1803	1498
firstTileUTR_00153	0	0	0	0	0	0	0	0	0	0	4	1			0	0	0	0	0	0	0	0	0	0	1	0	3	1
firstTileUTR_00154	72	64	180	70	196	317	45	93	23	0	60	49			114	0	70	0	192	0	148	92	138	86	40	26	97	109
firstTileUTR_00156	336	402	477	328	284	561	75	135	129	130	174	144			260	95	321	175	247	42	157	160	249	232	115	70	288	220
firstTileUTR_00157	79	29	0	0	0	0	19	0	23	0	8	10			0	0	0	0	0	0	31	30	5	5	12	6	19	25
firstTileUTR_00158	2869	4267	3557	2523	3842	2396	1665	1620	1222	1347	1408	1545			3913	5153	3812	2005	5224	1566	5460	5538	4370	4542	2862	1603	6433	5255
firstTileUTR_00159	3643	6385	5009	3730	4521	3439	1772	1902	1219	2022	1394	1687			4725	5744	5646	3900	7428	2022	6124	6368	5502	5821	2869	1759	6809	5883
firstTileUTR_00160	2246	3412	3046	2721	2972	3096	1296	1640	1344	1529	1298	1521			3064	3164	3579	2964	3932	1113	4877	4839	4113	3950	2874	1686	6419	5686
firstTileUTR_00161	1316	3096	2178	1693	1716	2017	1017	945	891	1156	744	876			3206	2943	3514	1893	3170	856	3609	3712	2789	2713	1715	937	3675	3071
firstTileUTR_00162	1947	2211	3036	2695	2502	2518	1036	1037	972	956	1036	1131			3812	2462	2789	2906	3868	826	3765	3745	2978	3021	2130	1240	4349	4015
firstTileUTR_00163	255	258	392	497	273	95	230	133	126	168	210	244			702	309	283	85	459	236	536	612	405	450	344	211	809	796
firstTileUTR_00164	310	252	310	170	272	248	133	163	48	53	101	102			569	225	204	417	286	162	314	352	310	286	147	81	269	287
firstTileUTR_00165	87	48	121	0	76	65	165	15	72	79	84	71			133	138	113	147	199	0	185	142	178	181	97	70	212	227
firstTileUTR_00166	656	1061	580	561	749	627	519	254	302	571	229	245			282	316	80	227	411	48	322	413	378	390	191	112	401	323
firstTileUTR_00167	696	645	1041	555	1011	466	380	319	448	338	364	368			240	650	387	285	587	200	619	534	504	483	305	213	582	562
firstTileUTR_00170	0	0	0	0	0	0	0	0	0	0	3	1			0	0	0	0	6	0	0	0	1	6	0	0	3	2
firstTileUTR_00174	303	1046	895	472	375	441	323	182	139	344	377	427			1528	1936	1554	2334	2168	330	1537	1387	1631	1542	1581	785	2912	2700
firstTileUTR_00175	400	1096	743	628	392	453	194	275	507	157	270	315			1772	1443	1704	304	1772	468	1927	2088	1455	1578	1155	651	2002	1853
firstTileUTR_00176	11303	18280	17252	13867	14683	11990	6647	7249	5732	6648	5575	6783			6575	6653	5534	4489	8562	2128	7409	7915	7172	7074	4365	2469	8944	7862
firstTileUTR_00177	8402	14786	15344	12007	10277	11295	5101	5622	4665	5208	4218	5002			4902	5826	5624	5548	6927	1900	7125	7378	6147	6396	3655	2142	7607	6629
firstTileUTR_00178	26	0	25	3	357	28	69	104	25	0	28	15			69	0	0	0	141	105	57	102	52	31	37	18	35	59
firstTileUTR_00179	0	0	0	122	20	0	9	62	0	0	16	30			0	0	0	0	17	0	5	11	11	17	23	13	26	27
firstTileUTR_00180	2349	3847	3160	3026	2802	2811	1307	1276	1313	1289	1201	1427			791	781	601	676	986	198	925	1163	1075	1074	608	396	1277	1124
firstTileUTR_00181	2085	4000	3625	2298	2447	2168	1789	1530	1089	1206	1250	1405			693	991	1109	1350	733	76	825	1092	992	1084	591	399	1339	1099
firstTileUTR_00182	2997	5117	5260	3403	4479	3623	1885	1778	1977	1811	1522	1882			1864	1264	349	792	1331	394	1352	1366	1430	1413	745	534	1687	1371
firstTileUTR_00183	4832	7066	5733	5333	5220	5230	2120	2478	2550	2535	2020	2193			1492	1980	1223	1418	1630	490	1861	1989	1630	1693	992	659	2093	1775
firstTileUTR_00184	27535	44613	41238	34243	33742	29938	15707	16406	14137	16059	14033	15876			46078	48941	47589	38222	54781	15373	53532	56466	47534	47288	31615	17706	61266	52136
firstTileUTR_00185	27773	47414	44448	34128	38165	32457	18000	18186	14835	18890	14530	16958			45965	48374	47138	40804	61037	16675	59790	62045	50537	50742	33062	18597	62882	56437
firstTileUTR_00186	31261	54266	49883	38419	39877	40317	18873	20166	17652	20365	16453	19030			53076	54330	52609	43565	66725	20025	67622	69823	56631	57412	38604	21592	74805	64859
firstTileUTR_00187	32570	52424	52399	39283	43772	36521	20024	20908	19029	21471	16151	18495			56041	57391	53317	43044	70955	18351	68242	70476	60047	58742	37129	20666	71876	63142
firstTileUTR_00188	361	421	895	155	458	598	370	221	141	212	235	290			529	345	224	331	601	0	330	504	444	348	271	169	527	477
firstTileUTR_00189	333	778	837	540	566	1067	273	423	588	390	259	296			571	638	211	1152	771	185	549	518	735	649	266	189	612	499
firstTileUTR_00190	595	561	585	481	457	200	284	138	144	353	233	249			445	325	461	189	355	0	452	486	365	372	248	179	508	485
firstTileUTR_00191	371	588	441	408	471	433	267	199	187	210	202	229			674	196	112	378	388	105	518	521	479	384	213	152	454	453
firstTileUTR_00192	214	551	760	480	429	523	181	167	172	280	170	185			505	408	267	405	485	343	358	440	306	323	178	132	335	328
firstTileUTR_00193	138	722	823	511	587	478	383	303	155	348	230	274			92	540	524	296	371	93	595	674	449	451	286	160	593	514
firstTileUTR_00194	983	1362	1410	1026	1334	958	750	651	683	707	584	669			1795	1170	1157	563	2002	485	2138	2078	2245	2025	1082	704	2293	2090
firstTileUTR_00195	907	1898	1557	1400	1184	662	760	471	539	615	465	558			2182	1555	930	1097	1666	315	1893	2026	1825	1801	920	636	1984	1671
firstTileUTR_00196	2530	3937	3844	3562	3418	2858	1579	2083	1519	1505	1541	1713			2259	1927	2341	1293	2547	763	2675	2723	2560	2291	1632	1028	3352	2879
firstTileUTR_00197	3734	4222	4329	4178	5064	3301	2116	2161	1820	1892	1829	2161			2479	2688	1773	1922	3042	894	3112	3347	3056	2957	1897	1294	4108	3394
firstTileUTR_00198	1479	2132	2325	1805	1845	2045	956	984	1176	676	890	903			4715	3992	3759	3896	5669	1488	6197	6422	4649	4556	3634	1770	6229	5366
firstTileUTR_00199	2402	6147	4016	2581	3961	3673	1530	1593	1487	2155	1343	1628			5641	8392	6345	4859	8717	2987	8869	8684	6950	6755	5167	2911	9792	7847
firstTileUTR_00200	16026	27420	23681	19442	20603	16984	9112	10529	8323	10143	8347	9579			30618	31100	30514	25914	39684	9525	37663	40781	35594	34925	19735	12057	42630	35929
firstTileUTR_00201	18643	29822	28336	19728	23829	23077	9668	9815	9678	11447	9271	11076			38147	40434	39864	33802	48733	13484	44835	47150	43754	43320	25055	15215	53048	44906
firstTileUTR_00202	17227	27313	25386	20500	21462	20415	9288	10174	9849	9652	8467	9971			34578	31519	34578	24715	41685	10072	41043	41790	37558	37757	20919	12678	44173	38304
firstTileUTR_00203	14156	23293	22086	14092	18163	15202	7307	7761	6710	8242	7215	8453			26727	22928	24913	18957	30278	8475	30181	31711	29387	28999	15799	9837	33406	28543
firstTileUTR_00204	13007	21779	19106	15026	18190	15966	6883	8283	7391	8144	6281	7355			27083	25515	21016	18723	32187	8296	30512	31622	27751	27507	15313	9560	31493	27423
firstTileUTR_00205	326	681	327	322	584	380	203	228	232	50	92	156			443	70	132	79	150	0	154	195	266	229	108	65	190	152
firstTileUTR_00206	955	991	688	539	366	386	341	455	364	362	230	294			576	519	660	669	218	13	524	538	348	421	209	128	367	363
firstTileUTR_00207	64	45	148	0	0	76	0	0	0	53	21	34			1	61	59	0	21	45	103	135	67	45	31	20	117	63
firstTileUTR_00208	125	0	24	0	0	79	0	5	28	0	36	44			130	0	0	0	15	0	28	33	86	77	60	34	108	93
firstTileUTR_00209	108	45	297	46	72	25	84	60	66	28	49	57			173	256	122	120	91	158	226	230	295	244	94	63	220	174
firstTileUTR_00210	41	185	44	87	23	180	32	22	16	64	20	24			0	1	0	0	55	81	68	29	68	76	25	13	43	49
firstTileUTR_00211	65	58	21	0	16	32	53	112	63	37	26	41			102	33	170	0	151	0	105	133	44	42	59	34	95	107
firstTileUTR_00212	0	31	29	41	74	34	0	1	75	0	3	10			0	0	0	0	15	0	22	21	20	30	8	12	22	31
firstTileUTR_00213	5925	8532	11328	8096	8809	5946	4106	4254	3276	3906	3766	4095			4921	4723	4417	4482	5162	1442	5185	5642	5566	5610	3537	2413	6641	5628
firstTileUTR_00214	7348	12021	10259	9215	9460	7474	4705	5217	3781	4876	3564	3892			6581	5348	3736	4146	5145	2117	6265	6561	5945	5846	3184	2099	5812	4785
firstTileUTR_00215	61	126	348	238	206	361	62	167	94	102	113	155			353	146	0	27	207	199	200	199	135	144	111	71	233	242
firstTileUTR_00216	179	524	159	235	196	92	79	85	65	79	107	124			66	99	65	3	82	33	143	109	104	147	134	69	265	212
firstTileUTR_00217	1457	2870	2141	2300	2253	1809	772	608	943	1042	618	696			599	903	650	257	1023	411	855	1111	999	931	476	271	1048	957
firstTileUTR_00218	1920	2797	2284	1136	2009	1989	641	781	673	978	914	973			605	855	1370	1052	1208	460	1225	1259	820	893	764	452	1628	1415
firstTileUTR_00219	1296	1537	1944	828	1753	557	427	630	578	443	773	759			916	833	531	665	889	186	959	842	721	817	509	291	1062	998
firstTileUTR_00220	1615	2423	1966	1521	1295	2159	753	1311	734	577	815	857			1329	783	438	516	857	195	1035	1055	864	765	674	369	1355	1266
firstTileUTR_00221	0	0	30	90	65	0	1	28	34	0	32	42			0	80	0	28	124	0	43	81	22	32	57	31	116	89
firstTileUTR_00222	0	25	48	79	0	0	22	19	0	0	24	20			68	35	0	23	34	3	58	79	0	0	68	40	112	112
firstTileUTR_00223	0	0	1	0	122	0	40	0	0	0	27	21			126	20	68	0	15	35	34	62	31	3	29	18	111	57
firstTileUTR_00224	0	0	0	0	0	0	0	0	0	0	23	32			0	0	0	0	0	0	0	0	0	0	46	28	95	91
firstTileUTR_00225	829	1113	1067	954	458	709	350	488	430	386	282	317			726	285	714	216	374	50	391	287	471	479	233	184	396	320
firstTileUTR_00226	776	2327	1428	1661	1177	865	490	612	456	647	422	506			1063	690	562	767	611	233	546	505	746	692	310	209	601	444
firstTileUTR_00229	0	73	0	0	0	34	0	0	0	0	0	0			0	0	0	0	0	0	8	18	7	2	0	0	0	0
firstTileUTR_00230	0	0	0	0	0	0	0	0	0	0	3	5			0	0	0	0	0	0	0	0	0	0	8	3	17	7
firstTileUTR_00233	1422	2528	2101	1567	2164	2251	1358	1115	1041	805	768	795			2425	2178	2096	2936	3246	1091	3305	3540	2892	2707	1578	852	3171	2526
firstTileUTR_00234	2012	3850	2530	2735	2210	2312	1144	1235	1112	1259	846	1008			2543	3297	2517	2027	2755	739	3722	3978	2991	2848	1677	1025	3261	2769
firstTileUTR_00235	1419	2510	1597	2234	1483	1237	655	811	495	854	945	1037			2525	2596	1737	863	2733	881	2941	2936	2243	2231	2210	1095	3520	3278
firstTileUTR_00236	1769	1941	2765	1648	2339	1424	953	1308	788	999	760	1065			3218	2420	1903	1223	3408	486	3586	3657	2502	2570	1950	1096	3384	3147
firstTileUTR_00237	753	892	853	287	397	405	321	280	203	375	221	264			759	621	119	531	530	199	457	348	540	551	293	192	531	439
firstTileUTR_00238	135	407	601	573	330	353	69	228	147	304	211	248			275	269	495	617	283	123	347	380	455	548	301	143	564	452
firstTileUTR_00239	80	135	276	141	68	149	0	77	24	70	42	27			89	79	168	0	24	37	84	67	100	85	31	13	53	66
firstTileUTR_00240	0	0	31	0	0	0	0	0	1	30	13	20			0	0	0	0	12	0	1	0	1	4	13	10	38	55
firstTileUTR_00241	3064	5324	4473	3153	4351	3447	1794	1687	1653	2251	1504	1600			2497	3080	1909	1342	3673	982	3460	3692	3152	3083	1787	1065	3542	2962
firstTileUTR_00242	1657	2804	2114	2806	2358	2307	1360	856	824	1107	1117	1149			1919	1506	1440	1677	1682	421	1840	2082	1719	1679	1293	771	2636	2193
firstTileUTR_00243	2713	4465	4928	3433	4141	2618	1879	1707	1569	1483	1413	1545			3162	2111	2673	2696	3273	587	2759	3002	2678	2321	1645	1037	3324	2829
firstTileUTR_00244	1252	2709	2604	2868	1987	2083	950	1275	1049	1056	978	1191			1466	1067	1150	1373	1465	661	2280	2289	1531	1577	1193	689	2247	2012
firstTileUTR_00245	467	931	720	1428	850	711	449	151	238	323	372	405			498	396	374	876	595	47	515	517	396	348	320	196	659	562
firstTileUTR_00246	401	1161	846	633	523	751	363	364	193	401	333	367			190	247	297	609	365	256	404	397	382	479	360	178	594	545
firstTileUTR_00247	519	1554	1182	1166	925	975	384	321	369	363	307	359			158	843	182	98	423	148	783	712	450	512	335	170	695	519
firstTileUTR_00248	1468	2309	2492	1178	1724	1934	808	696	1067	595	684	857			1166	1004	754	688	1132	163	1045	1049	872	889	697	434	1350	1197
firstTileUTR_00249	1870	3603	2400	1765	2228	1439	789	966	714	1001	802	968			526	1022	554	766	1097	362	1530	1460	1162	1173	826	465	1479	1320
firstTileUTR_00250	3283	5313	6308	3250	4952	4024	2373	2715	2280	2599	1938	2172			3659	3415	4784	2989	4103	1016	4244	4533	3275	3279	2762	1465	4928	4175
firstTileUTR_00251	3837	7582	5848	6067	5617	4179	2624	3087	2258	2420	2294	2499			5797	4141	4157	3115	5378	1014	5089	5075	4122	3871	3204	1748	5566	4926
firstTileUTR_00252	2725	6325	5493	4244	4484	4512	2255	2304	1913	1931	1780	2006			2989	2830	2715	2405	3760	853	4037	3683	2812	2724	2461	1373	4865	4065
firstTileUTR_00253	4144	5892	5431	3347	4582	4587	1850	2015	1842	2176	1821	2110			2667	3490	2999	2376	3627	590	3776	3913	2989	3337	2515	1442	4586	3949
firstTileUTR_00254	4358	6874	6574	4506	5180	5439	2716	2853	1799	2935	2076	2301			4423	3935	3981	3586	4265	1186	4662	4745	3936	4229	3074	1645	5343	4630
firstTileUTR_00255	957	1648	1309	770	863	648	418	584	283	526	528	603			678	309	469	849	644	328	677	644	656	591	460	319	803	742
firstTileUTR_00256	788	2023	1507	1978	1653	1718	488	669	582	702	536	585			842	1106	261	406	915	204	786	768	874	882	453	311	794	709
firstTileUTR_00257	0	0	0	0	39	15	9	0	0	0	2	4			0	35	0	0	10	0	15	42	0	7	3	2	8	18
firstTileUTR_00258	0	0	0	0	0	0	8	0	0	0	0	0			0	6	0	0	0	0	13	10	8	13	0	0	0	0
firstTileUTR_00259	30634	50853	43701	37052	39934	35969	16901	19467	17083	19618	15605	17805			46369	47492	43039	35583	57625	13690	58037	58320	51408	51633	28615	17097	61258	52858
firstTileUTR_00260	22944	40166	42156	26608	29897	27560	12646	14059	12640	14296	11348	13519			33954	30646	34180	23536	40137	11995	40719	41061	34370	34020	19656	11628	41732	35990
firstTileUTR_00261	29930	51530	42796	33701	38393	34955	18040	18613	16179	19062	14500	16822			43663	46763	44015	34891	57509	16166	54997	57327	49848	48094	27342	16159	57761	49622
firstTileUTR_00262	30194	49028	47442	36428	41361	35943	17880	19843	17019	18070	15172	17570			45709	42863	42991	29211	54369	14830	52890	54793	45485	45014	25944	15299	54507	46647
firstTileUTR_00264	0	0	0	0	0	0	0	0	0	0	0	0			0	0	0	0	0	0	0	0	0	0	0	2	0	0
firstTileUTR_00265	2015	2783	2541	2628	2229	1775	869	1187	967	1271	1051	1194			1486	2257	2182	1733	2511	845	2471	2855	2184	1853	1772	1047	3572	3309
firstTileUTR_00266	1808	2684	3408	1817	2744	1833	1037	1257	835	1291	929	1100			2819	2566	2368	2420	2739	397	3278	3268	2369	2407	1835	1025	3532	3015
firstTileUTR_00267	2977	4562	4687	4302	3700	3777	1881	2133	1697	1492	1397	1614			3903	2853	3023	2944	3408	1492	4243	4433	3512	3162	2248	1331	4537	3748
firstTileUTR_00268	2855	2695	2446	2454	2367	1885	1293	1043	1091	1105	1184	1345			2427	2093	1864	2294	3141	400	3097	3130	2649	2711	2026	1099	3718	3235
firstTileUTR_00276	4252	7187	6715	5517	5114	4667	2402	2473	2435	2742	2284	2402			5998	6462	4955	5621	6880	1816	6436	6825	7086	6678	3467	2163	8079	6767
firstTileUTR_00277	4017	6386	5349	4917	4557	4223	2305	2776	2079	1964	1846	2017			6045	7341	4963	4825	6666	1796	6673	7021	6043	5883	3234	1888	6920	5927
firstTileUTR_00278	152	534	299	300	176	193	109	193	36	53	82	100			155	69	202	39	135	146	128	64	90	90	72	38	147	167
firstTileUTR_00279	0	0	0	0	0	0	0	0	0	0	21	17			0	0	0	0	0	0	0	0	0	0	14	7	34	27
firstTileUTR_00280	4891	8986	7697	6097	6900	5880	2716	3267	3096	3279	2876	3436			6857	6730	6184	5486	7650	2068	8050	8457	7265	6993	5196	3045	10203	8585
firstTileUTR_00281	5941	10601	9074	8977	7864	7802	3810	4667	4376	4834	3603	4224			7214	8188	8121	7734	10459	2245	10754	10762	9121	9065	6580	3756	13042	11054
firstTileUTR_00285	0	0	0	0	0	0	0	0	0	0	2	0			0	0	0	0	20	0	0	0	0	0	3	2	3	1
firstTileUTR_00286	1053	1880	1651	996	1316	1250	640	407	479	604	507	581			1279	715	649	927	1218	132	1330	1521	1255	1104	725	404	1735	1357
firstTileUTR_00287	1233	1236	1301	866	1370	1101	360	413	641	686	561	630			1198	724	938	739	1104	449	1082	1156	934	921	799	467	1870	1573
firstTileUTR_00288	275	655	790	455	480	375	347	317	226	214	261	335			358	571	249	114	642	93	663	642	569	447	386	246	950	775
firstTileUTR_00289	975	660	1249	1481	954	899	572	484	414	573	367	443			723	750	324	1025	661	150	1146	1012	755	852	506	248	1168	968
firstTileUTR_00291	0	0	0	0	0	0	0	0	0	0	2	2			0	0	0	0	0	0	0	0	0	0	3	1	17	4
firstTileUTR_00294	15672	26910	28768	21216	21990	17440	10052	10685	9530	8337	8627	9578			10446	8277	9279	8375	9764	3563	9735	9842	9431	9588	5199	3636	10945	9175
firstTileUTR_00295	15503	29452	23932	17247	19634	19625	9955	9497	9348	9847	8830	9969			9580	9690	6921	8501	10036	3425	9441	10019	9384	10004	5495	3989	11543	9508
firstTileUTR_00296	3062	5198	4963	4156	3755	3759	1830	1725	1822	1802	1642	1757			1925	1574	991	1710	1868	973	1947	1900	2544	2148	1130	826	2039	1754
firstTileUTR_00297	2511	4781	5187	3500	3381	3433	1458	1938	1454	1430	1508	1585			1836	1079	1371	1524	2033	416	1796	1986	2140	2085	1026	733	1674	1533
firstTileUTR_00298	5101	8630	7938	6183	6785	5236	3375	3207	3197	3922	3529	4113			5625	4592	5815	4951	7400	1823	6313	6932	6294	6417	4885	3106	9999	8468
firstTileUTR_00299	4255	9428	7766	5845	6589	6137	3505	3169	2852	3650	2921	3395			4180	5381	5064	3357	5561	1972	6155	6663	5944	5869	3778	2341	7913	6653
firstTileUTR_00300	63	173	127	122	294	265	0	116	18	29	36	34			3	196	95	49	155	117	123	163	78	49	71	27	124	130
firstTileUTR_00301	0	55	0	0	0	0	20	0	0	0	13	16			0	0	0	0	0	0	5	0	9	34	16	9	37	11
firstTileUTR_00302	68	0	0	27	161	93	12	2	25	7	10	17			76	0	0	0	57	0	56	43	22	9	14	9	15	18
firstTileUTR_00303	199	29	269	57	49	146	32	26	62	5	57	51			221	0	115	201	282	18	204	143	81	139	71	59	138	134
firstTileUTR_00304	112	71	78	0	52	0	0	0	20	36	21	9			114	266	98	0	65	95	32	49	46	59	27	16	66	55
firstTileUTR_00305	168	288	37	152	167	61	37	185	10	68	83	74			838	549	881	517	806	133	1027	1001	600	631	599	349	1359	906
firstTileUTR_00306	64	93	579	62	150	308	84	98	58	0	79	91			288	612	1401	263	787	593	1501	1501	1191	954	678	389	1360	1099
firstTileUTR_00307	4056	6785	6518	4391	5757	5484	2150	2690	2070	2314	2381	2527			1633	1637	912	1425	2227	1332	2017	2131	3000	2947	1573	1250	3075	2578
firstTileUTR_00308	3548	7014	5814	6462	4759	4334	2192	2378	2260	2277	2253	2195			2095	1936	1120	1716	1769	873	2402	2535	3306	3503	1487	1177	2857	2340
firstTileUTR_00309	4354	8444	6475	6834	6541	5714	2953	3192	3082	3037	2804	3013			2917	2471	2101	2549	3323	907	2825	2604	3805	3842	1946	1520	3602	3087
firstTileUTR_00310	5009	7819	7433	5875	6422	6430	2844	3137	2874	2914	2666	3067			1992	1729	1314	2975	2406	871	2498	2575	3688	3545	1692	1444	3475	3051
firstTileUTR_00311	3640	5256	5950	4091	4446	3310	1594	2440	1914	2562	1838	2002			1850	1685	1365	1334	2244	1067	2082	2006	2698	2899	1258	999	2558	2166
firstTileUTR_00312	2933	5920	4920	3743	4676	3956	2216	2412	1692	2154	1820	2138			3019	3622	3331	2924	4755	1397	4088	4183	4134	3866	2410	1372	4536	3884
firstTileUTR_00313	4015	5459	6088	3241	4273	4431	1900	2274	1895	2031	1724	1914			3375	3102	3253	2212	4159	1191	3706	3955	3372	3479	1957	1154	4141	3574
firstTileUTR_00314	6043	9047	9585	7118	7518	7795	3554	4235	2869	3268	3145	3467			4927	6471	6453	5313	7201	1869	6995	7470	6351	6145	4576	2474	8634	7583
firstTileUTR_00315	10361	14989	13936	9442	10128	9937	5197	5484	4659	5394	4285	4911			4950	3793	4506	3749	4423	1619	4396	4505	4112	3982	2706	1623	5656	4688
firstTileUTR_00316	12540	23257	19454	16948	17020	13662	7920	8665	7329	9631	7097	7880			14097	11441	10100	10006	12039	3546	13047	12668	13381	13239	8002	4735	14297	12198
firstTileUTR_00317	13565	23232	21876	16194	18073	16958	7806	9276	8145	8259	7642	8616			13561	12191	10119	10043	12874	5577	13470	13467	13086	13173	8518	4968	14406	12319
firstTileUTR_00318	36	0	22	54	8	40	34	24	0	0	30	24			0	26	0	0	48	0	79	55	16	20	35	19	60	42
firstTileUTR_00319	46	108	44	1	188	66	73	29	74	0	22	13			0	40	106	1	112	0	94	96	45	28	28	11	34	45
firstTileUTR_00320	15868	25215	24782	19516	20426	17741	8060	10730	8953	9290	9640	10734			11004	8600	9064	8849	11645	3036	10810	10647	11052	11106	7575	4863	13830	11547
firstTileUTR_00321	12151	20165	19070	17067	17681	13091	8291	7805	6628	7681	8178	8842			9863	7132	6322	7314	8877	2900	9098	9548	9283	8696	6382	4255	11880	9896
firstTileUTR_00323	0	0	0	0	0	0	0	0	0	0	2	3			0	0	0	0	0	0	0	0	0	0	2	13	47	3
firstTileUTR_00326	33991	51693	46116	38839	40385	36706	18677	20279	16987	18914	15229	18100			36528	30463	30600	30670	40447	12782	36340	39057	35294	34573	18039	12629	42662	37048
firstTileUTR_00327	31920	54716	56221	42391	44576	41170	18429	21694	17234	21332	16920	19253			36585	38561	36159	28192	45123	13427	43014	43302	39882	39719	20602	14160	48211	43201
firstTileUTR_00328	5861	8687	7688	5912	5761	6143	3110	3949	3324	2983	3133	3650			5504	4348	4931	3186	5335	1747	6041	6041	5676	5639	3864	2328	7732	6795
firstTileUTR_00329	8473	16541	13679	11459	10848	9949	5221	5467	4304	5696	4922	5501			10018	9373	8234	7756	10071	3129	11485	12080	8849	8981	6547	3869	13084	11238
firstTileUTR_00330	6531	13009	11086	7719	8558	7342	3660	4041	4224	4574	3522	4005			5329	5852	5646	5184	7604	2262	6317	6577	6420	6146	3809	2299	7958	6654
firstTileUTR_00331	7097	11298	11277	7182	8304	7384	3409	3963	3471	4057	3513	3922			5875	8066	5740	5486	6467	1533	7149	6942	6042	5907	4422	2469	8766	7726
firstTileUTR_00332	1813	2865	2949	2020	2473	1816	861	1277	934	1052	950	1030			2654	1763	1882	1711	2251	757	2698	2752	2578	2642	1336	907	2648	2070
firstTileUTR_00333	1994	3959	2588	2338	3600	1932	1223	1154	1237	811	1089	1220			1983	2236	2069	2452	3106	1489	2872	3160	2592	2722	1584	1070	3088	2597
firstTileUTR_00334	1806	3276	3796	2626	3188	2544	1339	1516	873	1262	1098	1299			2416	2189	2668	1819	3169	900	3238	3335	2500	2343	1382	1005	2773	2420
firstTileUTR_00335	1672	4220	2714	2626	2930	3728	1495	1513	1031	1115	1149	1179			2426	2488	2398	2469	3592	843	3389	3554	2972	2938	1534	1034	2749	2379
firstTileUTR_00336	4479	7065	6578	3978	4549	4194	1640	2298	1823	2406	2314	2692			5803	6571	5342	4467	7025	2424	7571	8021	6350	6803	4835	3053	9131	8008
firstTileUTR_00337	2747	5225	4815	3419	3886	3552	1977	1785	1747	1857	1661	1795			5689	5264	4842	6492	6544	1623	6303	6463	6058	5783	3423	2213	6233	5487
firstTileUTR_00338	1861	4144	2945	2623	1508	1810	1114	1021	808	1165	1093	1105			879	521	419	1576	862	301	728	871	932	1028	511	377	883	807
firstTileUTR_00339	2285	4245	4188	3375	2934	2489	1426	1206	1246	1257	1225	1223			1095	947	629	379	712	270	740	805	946	1012	595	429	1019	878
firstTileUTR_00340	5683	8112	9413	6998	7132	5845	3606	4218	3517	3065	2865	3044			3219	2745	3131	3082	3122	1567	3183	3101	3483	3487	1459	937	2776	2336
firstTileUTR_00341	4760	8925	7203	6187	6260	6460	2776	3280	3057	3110	2717	3177			3168	3021	1356	2218	3326	1047	3055	2755	3288	3464	1489	989	2926	2566
firstTileUTR_00342	4482	7000	6731	5160	6263	5432	2551	3476	2775	2588	2330	2767			2284	1994	1574	2222	2810	1178	2288	2688	2969	2870	1238	876	2271	2064
firstTileUTR_00343	3276	6487	5946	4680	3446	4937	2474	2860	2120	1887	2288	2424			2337	1514	1242	3082	2151	792	2286	2418	2763	2880	1272	819	2436	1968
firstTileUTR_00344	667	669	811	1186	761	396	241	174	287	464	312	353			725	453	626	242	636	156	435	595	744	498	452	268	819	811
firstTileUTR_00345	187	284	135	69	55	74	175	84	76	157	91	67			410	458	224	3	181	0	144	172	192	271	138	60	243	171
firstTileUTR_00346	960	1808	692	627	781	615	403	749	178	311	363	394			1007	661	466	683	999	225	1111	1216	607	676	576	297	1149	907
firstTileUTR_00347	0	19	192	85	85	0	43	16	66	0	42	56			0	138	154	0	49	0	18	27	78	50	76	42	122	94
firstTileUTR_00348	2245	3619	2456	2691	2995	2269	1454	1291	1552	1380	1086	1123			3336	2264	2125	1928	2688	572	2555	2720	2829	2584	1378	949	3302	2590
firstTileUTR_00349	1186	2069	2736	1327	1530	1266	922	743	702	867	737	805			649	1554	1728	1096	1949	387	1604	1838	1576	1855	892	551	2031	1794
firstTileUTR_00350	1790	3143	2413	1680	1787	1924	823	1313	1203	1176	800	917			2121	2089	1195	2231	2037	303	2075	2302	2066	2220	1045	661	2291	2161
firstTileUTR_00351	1526	3411	2541	1637	3088	2384	785	859	976	700	792	1006			2467	1939	1640	1300	2739	731	2327	2361	2220	2163	1033	642	2387	2138
firstTileUTR_00352	1783	2955	2901	2009	3035	1774	1309	947	1177	1334	758	857			2148	2278	1436	1035	2988	647	2410	2445	2542	2562	1012	706	2490	2099
firstTileUTR_00353	1864	3031	2862	1573	2956	2292	1096	1370	749	1057	881	857			1961	2062	1692	3103	3075	931	2558	2474	2838	2942	1023	743	2524	2216
firstTileUTR_00354	1810	2331	2713	2751	2616	2588	1282	1696	923	1348	877	1089			2907	2229	2327	1189	2677	600	2727	2663	2966	3228	1425	1008	3425	2829
firstTileUTR_00355	1891	2535	2329	1712	1674	2409	879	892	796	996	739	754			2025	2042	2655	1617	2560	1080	2057	2207	2268	2460	1036	628	2358	2110
firstTileUTR_00356	18	0	0	0	29	0	0	0	0	0	0	0			0	0	0	0	0	0	0	0	0	0	0	0	1	0
firstTileUTR_00357	0	0	0	0	0	0	0	0	0	2	0	0			0	0	0	0	0	0	3	2	0	4	0	0	0	4
firstTileUTR_00358	4201	6136	6999	4686	7071	5504	2681	3185	3295	2975	2163	2502			8369	5650	7451	4662	9497	2467	8976	9272	7938	8243	4533	2780	10379	8781
firstTileUTR_00359	4197	6412	6290	4191	4553	3805	2131	2604	2457	2389	1982	2234			6911	4764	4375	4238	6554	1725	6096	6118	5153	4967	3322	2011	7447	6054
firstTileUTR_00360	4602	6843	7911	4812	5196	5057	2378	2471	2489	2912	2431	2592			7448	6180	6896	6280	8179	1707	8272	7820	7893	7730	5224	2974	11705	9654
firstTileUTR_00361	4123	9445	6016	6870	6288	5819	2694	3341	2644	2992	2367	2565			6495	7385	4626	5896	8204	2599	9041	9524	6627	6421	4263	2523	10077	7931
firstTileUTR_00362	255	1759	589	783	759	604	323	407	263	201	245	274			986	695	705	201	501	303	724	709	502	482	300	172	511	421
firstTileUTR_00363	1507	1560	1963	1721	1368	2251	772	747	708	834	691	779			1641	1110	544	672	1325	584	1434	1640	1347	1411	787	453	1452	1304
firstTileUTR_00364	4805	7817	8730	5650	6909	4850	3022	2968	2731	2818	2557	2833			4830	4866	3847	2951	5958	1133	5055	5252	5559	5708	2742	1935	6315	5423
firstTileUTR_00365	3554	7946	6701	5490	6483	5840	2667	2791	2645	2545	2502	2600			5145	5288	4139	3267	4793	1849	4530	4864	5002	5204	2409	1886	5871	5025
firstTileUTR_00366	2904	5314	4086	2949	4342	3988	1510	2239	1709	2197	1937	2092			2967	3311	3146	1203	3963	1365	3204	3430	3534	3507	1974	1413	4626	3846
firstTileUTR_00367	5125	12788	10357	8435	8409	7590	4214	4534	3543	4187	3834	4238			6183	6595	4876	6786	8357	2167	7309	7589	7502	7606	3936	2884	9086	7712
firstTileUTR_00368	7202	12255	10367	10275	8338	7904	4157	5240	4292	5216	3926	4201			7428	5902	5922	6403	7963	2493	7663	8080	8928	8396	4037	2934	9338	7822
firstTileUTR_00369	5649	10348	8161	7934	7824	7418	3551	4395	3132	3170	3331	3509			5519	5192	5041	3798	6922	998	5886	6168	5520	5388	3682	2355	7455	6291
firstTileUTR_00370	8469	12013	10823	8969	10944	9684	5079	4824	4286	4436	4328	4719			8270	7353	5978	5388	8961	3263	8144	8672	7676	7831	4718	3193	9803	8352
firstTileUTR_00371	5693	8761	8653	6204	7726	7870	3436	4289	3525	3379	3397	3853			6240	5820	6911	4858	8984	2633	8647	9430	7592	7604	5590	3286	10968	9697
firstTileUTR_00372	4622	8989	6999	5301	5766	4334	2634	2893	3072	3428	2805	3141			6592	8094	5996	4240	7234	1593	7967	8218	6759	6510	4929	2702	9556	7991
firstTileUTR_00373	6266	9525	9321	7270	7480	6757	3013	3098	2815	4277	3418	3936			7876	7673	7843	5519	9037	2484	8327	8570	7241	7696	6120	3540	12319	10713
firstTileUTR_00374	6349	9654	10160	7199	8750	7186	3445	4004	2768	3249	3015	3410			7571	6049	6877	4107	8350	2249	7861	8213	6652	6329	5077	2883	9320	7961
firstTileUTR_00375	4087	6031	7354	3954	5134	4316	2349	2665	2033	2320	2446	2712			5269	3987	4360	2725	5894	1150	5495	5613	4463	4597	3636	2035	6860	6390
firstTileUTR_00376	5464	8816	7643	6331	6740	5978	3622	3719	2978	3068	2916	3427			7671	6998	7048	6222	9663	1780	9337	9661	7496	7250	5587	3178	10938	9141
firstTileUTR_00377	9389	16370	15001	10892	12205	12255	5935	6733	5504	6240	5252	5925			11718	12303	11663	10485	15026	3601	17143	17832	13782	13383	10918	5891	18154	15782
firstTileUTR_00378	9187	13336	14549	11082	11324	10419	5751	6028	4478	6160	4782	5501			14638	13757	13721	9773	15784	4018	16612	17414	13001	12686	10664	5865	17641	14905
firstTileUTR_00379	7677	11231	12273	8300	10785	8813	4777	4870	3595	4430	3908	4533			10267	8665	9630	9753	12322	3670	12465	12779	10273	9775	7414	4225	13123	10985
firstTileUTR_00380	7035	12118	13346	9430	8657	9674	4104	4445	3976	4054	3759	4345			12013	10283	9795	9413	11766	2872	13101	13722	10429	11182	8367	4432	13794	11821
firstTileUTR_00381	5051	6696	7346	5004	5927	4878	2495	2728	2280	2860	2862	3219			3508	2850	3721	2575	3511	977	4218	4076	3644	3783	2747	1751	5302	4539
firstTileUTR_00382	3444	6230	4909	3449	3928	3219	1816	2314	1713	1682	1633	1783			2828	2246	2606	1500	2780	704	2802	2650	2633	2255	1424	970	2748	2209
firstTileUTR_00383	2924	5669	4549	4551	3657	2475	1610	1242	1473	1437	1682	1908			2058	2604	2556	1830	2499	933	2615	2728	2432	2652	1648	1056	3226	2750
firstTileUTR_00384	2925	4483	5145	3289	3905	3816	1513	2112	1318	1905	1642	1878			2379	2130	2099	2448	2831	945	3174	3361	2396	2277	1523	986	3151	2462
firstTileUTR_00385	3151	5153	4901	3584	3890	3477	1788	2247	1710	2274	1700	1853			1820	2216	2216	2504	2322	911	2652	2898	2439	2522	1560	1023	3111	2650
firstTileUTR_00386	2498	3421	3129	3021	2952	2705	1105	1359	1238	1109	1053	1252			1739	1316	1100	940	1765	880	1719	1644	1770	1801	917	631	1722	1574
firstTileUTR_00387	2210	3706	3202	2797	2734	2621	1471	1831	1217	1041	1123	1257			1948	953	1607	1469	1740	798	1477	1547	2049	1842	905	671	1733	1486
firstTileUTR_00388	1927	3806	3989	2509	2678	2395	1482	1478	793	1095	1114	1166			991	1367	1065	1857	1544	731	1470	1487	1489	1468	804	602	1411	1247
firstTileUTR_00389	2337	3433	2670	2409	2553	2678	1316	964	1140	1354	1330	1307			1495	991	1039	1582	1446	1065	1239	1401	1702	1740	950	709	1776	1457
firstTileUTR_00390	3438	6008	4058	4341	5362	4346	1647	2194	1563	2057	1521	1802			4950	3533	4021	3471	4608	1397	4880	5010	3573	3908	2492	1354	5268	4332
firstTileUTR_00391	2010	5474	4301	3918	2911	3208	2256	2319	1501	1536	1487	1693			2323	3782	3450	2800	4016	790	4520	4504	3385	3645	2345	1279	4557	3863
firstTileUTR_00394	17	97	0	0	35	0	0	0	0	0	28	28			0	23	60	0	0	0	4	5	2	0	24	18	53	34
firstTileUTR_00395	0	38	97	92	74	111	49	47	67	8	109	100			445	21	0	334	256	0	106	143	65	58	128	71	263	236
firstTileUTR_00396	271	729	437	259	492	408	89	135	196	88	108	138			821	504	485	493	459	41	696	728	481	517	366	210	683	634
firstTileUTR_00397	479	459	474	596	261	135	176	44	71	101	152	145			523	702	1008	397	924	82	611	604	689	671	398	242	675	667
firstTileUTR_00398	0	0	0	0	0	50	0	0	0	0	3	8			0	0	0	0	0	42	0	0	0	7	18	8	38	17
firstTileUTR_00399	100	99	244	139	191	48	77	26	67	88	47	61			51	4	118	1	195	10	408	363	138	242	141	90	289	278
firstTileUTR_00400	217	209	159	120	220	184	90	41	60	36	111	137			698	1076	413	478	562	155	595	597	554	445	627	325	1035	981
firstTileUTR_00401	268	230	232	260	317	389	106	42	57	149	191	203			1306	666	652	514	1108	239	1286	1282	900	865	887	489	1613	1484
firstTileUTR_00402	593	303	484	224	271	190	210	159	89	131	123	128			1469	629	1140	713	1471	250	1124	1135	729	682	544	294	851	834
firstTileUTR_00403	180	725	464	475	269	450	171	165	213	254	123	199			567	1636	889	1281	1273	404	1951	1977	1327	1272	700	417	1302	1019
firstTileUTR_00404	9385	18345	14062	12746	14331	13322	6719	6192	6059	5839	4854	5455			7222	6616	6208	4538	8211	2908	7930	8061	7450	7547	3899	2719	7962	6987
firstTileUTR_00405	11971	21697	18082	15772	14853	14408	6517	8441	6832	7020	6024	7184			8726	8097	6129	7406	8338	2808	8271	8451	7810	8178	4827	3064	10331	9084
firstTileUTR_00406	6816	12832	13610	10441	9809	9591	4623	4875	3915	4669	4524	5144			6379	4814	4942	4632	5427	2565	5844	6044	5824	5712	3458	2376	6925	5912
firstTileUTR_00407	10539	20761	17451	13791	14638	13436	6925	6773	6087	7073	5926	7133			8497	7286	5415	5068	7683	2474	7910	7281	7321	7627	4428	2844	9895	8530
firstTileUTR_00408	2682	4070	3014	2547	2147	2103	1178	1014	901	1261	1098	1240			3592	3186	2812	2805	3615	1107	3882	4187	2976	3106	2478	1315	4274	3647
firstTileUTR_00409	2324	4075	4995	3724	2958	3097	1396	1703	1451	1453	1259	1403			3790	4063	5338	3562	5046	1354	4509	4891	3701	3607	2507	1396	4489	3960
firstTileUTR_00410	1974	3208	3412	2975	2459	2220	1373	1591	1297	1233	1212	1215			2576	2322	2647	2978	3391	1182	3765	3337	3102	3165	2396	1413	4238	3554
firstTileUTR_00411	1694	2528	3130	1858	2291	1825	884	886	611	808	979	1132			2473	2384	2388	1617	2917	1209	3145	3315	2226	2314	2064	1195	3783	3378
firstTileUTR_00412	2555	3367	4101	2513	3258	3004	1642	1728	1552	1172	1376	1623			4363	3279	3424	2479	3871	935	4316	4592	3490	3305	3133	1835	5867	4796
firstTileUTR_00413	2692	3220	1957	2043	2540	2164	903	1699	905	1126	1211	1332			3731	3432	2199	2176	3619	713	3427	3553	2445	2515	2416	1407	4153	3703
firstTileUTR_00414	9634	16248	13961	10665	11971	8552	4918	6039	5138	5186	5077	5644			12500	13491	14519	10592	15421	3940	15001	15934	13203	13300	9290	5511	16936	14525
firstTileUTR_00415	10507	18814	14486	11120	14939	12728	6201	6653	6272	6228	5497	6096			15023	13681	13074	11207	17808	4837	19075	19228	15810	15895	10181	6180	18832	15853
firstTileUTR_00416	619	738	611	366	428	295	175	296	181	130	233	238			172	193	178	548	214	0	209	192	181	200	209	133	342	299
firstTileUTR_00417	688	1122	696	896	500	346	388	692	281	387	339	295			614	272	123	340	113	52	304	205	237	182	225	142	338	318
firstTileUTR_00418	650	995	1072	941	772	736	158	464	359	249	356	382			193	288	402	461	420	139	164	278	253	259	310	184	561	457
firstTileUTR_00419	416	1065	447	709	536	760	200	235	211	423	279	273			81	146	279	449	348	137	285	192	231	269	226	150	361	353
firstTileUTR_00420	513	731	500	493	638	635	143	159	145	278	278	290			119	197	107	179	192	166	99	129	153	207	185	142	366	270
firstTileUTR_00421	0	58	51	0	0	46	41	43	0	0	8	8			0	0	0	0	0	0	11	34	1	1	7	4	19	17
firstTileUTR_00422	0	138	226	0	37	0	0	24	42	62	18	11			0	0	0	0	0	0	17	6	22	24	14	7	42	27
firstTileUTR_00423	79	68	29	0	0	76	31	27	0	0	12	4			0	22	0	0	0	0	71	99	17	2	9	1	2	4
firstTileUTR_00424	0	121	0	0	28	108	0	11	37	0	36	22			0	0	0	0	17	0	20	20	10	5	26	16	35	25
firstTileUTR_00425	2769	4424	4293	4004	3953	2881	2251	2135	1526	1661	1722	2011			3583	3677	3927	3156	4448	1220	5217	5323	3623	3710	3098	1811	6205	5466
firstTileUTR_00426	3394	6586	6607	4801	4758	4681	1788	2583	2377	1864	2039	2567			5198	5370	5900	4156	6248	2385	6610	6833	5974	6141	4295	2542	8561	7529
firstTileUTR_00427	3991	4813	5498	4629	4543	4520	2060	2485	1852	2121	1661	2074			3830	4235	3924	3228	5127	1699	4412	4747	3768	3935	2955	1621	5558	5031
firstTileUTR_00428	7138	10071	11438	7920	9415	8610	4428	4165	3545	4574	3804	4302			10823	9121	9107	6853	11308	3191	10889	11381	10165	9634	6893	3751	13228	11968
firstTileUTR_00429	3370	5911	5432	3711	5083	3486	2192	2036	1968	2084	1812	2022			4949	4727	3676	3049	6861	2059	6229	6454	4721	4906	3339	1775	6775	5832
firstTileUTR_00430	5183	11793	9601	6822	8472	6642	3457	3961	3075	3631	2862	3191			7118	9563	8791	7873	10113	3260	10911	11352	9184	9562	6055	3635	11515	10374
firstTileUTR_00431	5182	7363	7889	6116	5720	5886	2911	3007	2374	2299	2542	2685			8529	5999	7028	6374	9185	3753	9078	8967	7433	8100	5143	3163	9920	8744
firstTileUTR_00432	7776	12429	12400	10333	10392	9552	4907	5146	4537	4671	4805	5385			7332	7867	7723	5725	10043	2904	9796	10164	7972	8463	6290	3639	12607	11176
firstTileUTR_00433	10238	19337	14114	13279	13166	12887	6242	6919	5598	5943	5463	5950			9840	9956	8156	7937	10755	3344	12002	11837	9316	9683	6880	3834	13734	12153
firstTileUTR_00434	12274	17522	16564	14038	14332	12564	6557	6818	5782	6732	5666	6431			12198	9195	10637	8394	13362	4161	13243	13214	10887	10260	7876	4525	15613	13534
firstTileUTR_00435	11183	20099	16611	15802	17357	15158	6997	6971	6232	7003	6797	7257			8091	10635	9108	7967	13121	4022	13142	13453	10796	10806	8182	4633	15995	14327
firstTileUTR_00436	2326	4035	3008	2517	2963	2559	1382	1400	933	1222	1233	1375			8513	10014	8842	7641	11675	3541	9505	9619	7744	7973	7522	4254	14675	12972
firstTileUTR_00437	2526	4179	4205	2546	3174	2463	1524	2093	1129	1736	1414	1628			9167	8778	8773	8518	9121	2659	9658	10122	8505	8359	7472	4232	14480	13194
firstTileUTR_00438	3066	4307	3847	2576	3581	3342	1683	1683	1459	1670	1452	1715			10893	10800	9087	8160	11198	2956	10054	10346	7811	7714	6191	3674	12847	11168
firstTileUTR_00439	2116	3695	3371	2429	2759	2928	1332	1337	1027	1182	1328	1469			6309	6680	6725	4581	7588	2256	7010	7567	5724	6245	5088	2888	10621	9153
firstTileUTR_00440	2670	4400	2621	3637	3363	3932	1366	1815	1810	1586	1315	1463			2745	2601	1461	1746	2815	1024	2469	2567	2664	2521	1526	925	3004	2579
firstTileUTR_00441	1816	2936	2932	1740	2465	1894	1156	1607	582	763	1037	1143			2032	1287	1164	886	1726	164	1813	1874	1456	1403	1160	689	2282	2051
firstTileUTR_00442	2804	3936	4982	3418	3990	3875	1637	2401	1338	2147	1353	1532			2368	2132	2217	2019	3019	815	2892	2985	2397	2391	1487	964	3067	2285
firstTileUTR_00443	2270	5185	3490	3293	2387	3465	1300	1752	1329	1678	1446	1347			2170	2680	1801	1892	2232	1642	2624	2614	2007	2179	1570	916	3023	2612
firstTileUTR_00444	5341	8287	7424	6958	5983	6152	2846	3921	2934	3426	2566	3017			4514	4796	4800	4644	6140	1319	6124	6625	4773	4824	3243	2070	6277	5379
firstTileUTR_00445	6138	8840	8071	5660	7953	7628	2682	3249	3031	3284	3250	3486			6193	4542	3865	3779	6548	2083	6423	6403	6077	5807	4099	2523	7544	6790
firstTileUTR_00446	0	0	0	0	0	33	0	0	1	0	19	28			0	0	0	0	9	0	3	0	5	0	41	26	93	56
firstTileUTR_00447	91	129	104	108	91	84	20	51	53	101	31	53			0	186	25	0	67	0	112	120	62	52	71	40	135	83
firstTileUTR_00448	0	46	0	0	0	27	0	0	0	0	4	6			0	0	0	0	0	0	5	0	0	5	2	1	6	2
firstTileUTR_00449	62	0	0	0	0	1	0	0	0	0	5	10			0	0	0	1	0	0	0	0	0	7	5	3	5	8
firstTileUTR_00452	784	984	600	746	769	543	625	287	305	143	252	269			532	866	386	198	452	28	479	402	387	317	250	135	559	440
firstTileUTR_00453	600	988	710	563	409	406	373	577	191	162	296	317			216	211	147	256	227	154	362	372	250	173	247	146	572	422
firstTileUTR_00454	8479	12367	11842	11145	12172	10005	4688	5524	4922	5182	4435	4851			19590	18131	15183	13122	25517	6257	23981	25214	19304	19141	13606	7853	28724	24069
firstTileUTR_00455	10009	17093	15272	12877	15166	11621	5203	5917	5418	5420	5146	5687			23470	21387	21691	18444	30672	7339	27276	28652	23478	22849	15773	9395	33832	29142
firstTileUTR_00456	1055	1635	1210	824	950	1235	460	593	275	571	370	438			593	417	791	582	531	221	711	701	685	670	370	220	794	578
firstTileUTR_00457	2035	3187	2373	2293	3026	2351	951	1397	1193	1186	1207	1396			724	950	847	970	1369	391	1086	1166	1045	1077	1006	663	2024	1781
firstTileUTR_00458	1071	1687	1910	1050	1331	1105	698	875	572	537	518	564			1296	466	796	911	570	170	898	1062	710	734	495	289	1077	855
firstTileUTR_00459	611	1071	1082	959	695	501	426	458	264	133	468	543			538	262	337	249	572	328	564	567	429	356	444	281	1014	835
firstTileUTR_00460	2480	3800	2547	2779	2172	1685	1248	1061	1189	1606	1090	1491			1222	1303	1327	941	1192	270	1443	1467	1441	1429	985	610	1990	1834
firstTileUTR_00461	1286	2613	1962	1756	1649	1173	899	878	875	610	830	919			311	589	437	487	792	0	742	777	543	592	485	287	1159	1050
firstTileUTR_00462	1269	2225	2388	2207	1468	1714	740	971	606	1095	651	730			845	503	1094	361	751	314	876	874	772	706	397	189	876	735
firstTileUTR_00463	1622	2945	2748	1426	1757	1763	1260	847	1260	888	875	909			1151	821	820	498	607	144	849	771	772	745	465	264	1076	896
firstTileUTR_00464	1001	1714	1063	1429	894	903	563	875	470	521	554	644			262	279	588	166	379	182	436	475	374	390	287	183	695	611
firstTileUTR_00465	11110	17159	15243	12625	15242	13072	6793	7446	5659	7042	5599	6244			10871	10406	9134	7098	12527	4304	12740	13447	10819	10784	6193	4112	10668	8871
firstTileUTR_00466	9383	17648	18209	12903	16219	12732	6885	6778	5751	6320	5680	6391			10554	10408	10473	10535	12334	2865	11928	12214	10728	10713	6072	4043	10564	8864
firstTileUTR_00467	12226	17523	16518	10499	14144	11481	6381	7097	6296	7351	5549	6281			9115	9919	9613	7868	12502	3561	12840	13323	11123	11314	6396	4146	10394	8699
firstTileUTR_00468	12033	20813	16504	14056	14210	13369	6438	6722	6458	7263	6046	7090			11913	9989	10071	8415	12059	4236	12684	13292	12089	11537	6393	4247	11255	9500
firstTileUTR_00469	11744	19347	16616	17846	15905	13724	7779	8109	7132	7098	6534	7022			11759	11465	9088	10202	13464	3509	14217	15304	13003	12638	6818	4623	11644	9789
firstTileUTR_00470	1297	2250	1994	1406	2102	1448	853	871	691	904	670	800			1002	917	693	719	1267	186	966	1113	1092	1101	631	390	1232	1095
firstTileUTR_00471	535	1225	1787	1082	684	687	631	526	424	416	441	589			210	673	374	679	388	308	916	802	593	628	421	246	898	731
firstTileUTR_00472	1432	2376	2671	1538	1849	2092	1061	864	645	971	927	991			3058	2720	3177	2404	3782	1334	3118	3242	2837	3137	2060	1205	4219	3507
firstTileUTR_00473	1936	3252	3024	2676	1808	1727	1175	1239	790	1305	1076	1161			3260	3137	2673	2273	3413	785	4168	4275	3593	3329	2527	1443	4964	4152
firstTileUTR_00476	15336	22355	21895	17268	19088	16805	8478	9252	7370	7893	7632	8334			24703	21236	20949	22236	25296	8364	25427	26219	22923	23407	17098	9338	35569	30852
firstTileUTR_00477	10958	17195	17992	13120	13834	13293	6136	6862	5840	6739	6214	7028			18274	17967	17181	15454	18502	5521	21069	21658	18862	18241	14559	7712	30263	26284
firstTileUTR_00478	9913	18446	15690	11731	13636	12929	5892	6100	6313	6660	5373	5882			13939	13183	9885	10217	14174	5251	13261	13202	13764	14054	8559	5186	17890	16063
firstTileUTR_00479	9656	13226	13545	9496	11727	8591	6056	5894	4292	5323	4848	5504			15039	13998	13781	12665	16965	5216	17971	17703	16376	16124	12017	6469	24932	22002
firstTileUTR_00480	18322	30563	29579	23420	26743	20651	11849	13177	9974	10032	9236	10338			31921	30906	28242	24189	37892	10197	34713	36113	30348	30413	21109	11262	43343	37632
firstTileUTR_00481	9509	16292	14028	13126	13557	11188	5371	6210	5657	5256	5370	5888			12779	12418	11862	11542	16288	4468	13604	13907	13685	13694	9393	5279	19156	16909
firstTileUTR_00482	15842	26003	22511	19675	21720	17601	9764	9768	8098	9905	8622	9347			15125	13451	14169	12224	14833	5270	15326	16371	14818	14710	9184	5710	16803	14285
firstTileUTR_00483	15654	28684	25793	19363	21236	19757	11191	12616	10034	9787	8545	9460			15401	14115	11537	11027	17514	5820	16292	16782	15445	14984	9107	5572	16639	14326
firstTileUTR_00484	15595	29641	22324	20182	21417	17990	10276	11347	9520	9935	8804	9776			14964	14995	12288	11446	17234	7843	16755	17026	17173	16556	9436	5793	17463	15471
firstTileUTR_00485	14439	21627	23846	18684	18872	18174	8343	9652	8069	8360	7642	8633			13306	13498	12099	10492	14456	5329	14975	15804	14629	13824	8538	5231	16347	13500
firstTileUTR_00486	334	476	436	263	292	253	136	162	369	32	111	98			578	425	299	353	402	242	357	229	420	394	138	74	271	236
firstTileUTR_00487	0	226	19	0	33	0	24	40	16	0	75	53			22	24	45	100	50	0	25	29	39	22	96	35	164	128
firstTileUTR_00488	150	137	0	0	117	88	8	18	51	92	62	71			273	27	0	0	108	0	132	147	174	111	81	46	191	208
firstTileUTR_00489	56	215	198	81	31	0	77	26	48	97	48	54			46	128	101	0	106	0	117	106	78	68	61	43	156	102
firstTileUTR_00490	62	274	251	56	300	224	44	162	47	56	91	133			1	239	575	468	122	41	192	208	188	156	137	81	252	198
firstTileUTR_00491	16	0	0	0	0	0	13	64	10	0	15	16			56	40	123	0	16	0	20	9	6	20	28	29	33	35
firstTileUTR_00492	0	0	0	0	0	0	0	0	1	0	0	0			0	0	0	0	0	0	0	0	29	22	0	1	2	6
firstTileUTR_00493	0	0	62	0	98	0	0	0	0	0	23	44			0	89	0	0	96	67	35	44	38	32	50	35	115	106
firstTileUTR_00494	0	0	0	0	0	0	0	0	0	0	11	15			0	0	0	0	16	0	5	2	0	0	30	23	78	49
firstTileUTR_00495	18	17	78	59	0	0	65	92	0	0	13	20			0	113	0	0	141	40	103	113	18	55	29	9	66	35
firstTileUTR_00497	0	0	0	0	0	0	0	0	0	0	4	0			0	0	0	0	0	0	0	0	0	0	6	2	11	2
firstTileUTR_00498	6132	9601	10823	6179	8425	8473	3812	4226	4343	4234	3555	3799			4306	5141	3742	5403	6445	1628	6324	6428	5757	5805	3558	2047	6942	6151
firstTileUTR_00499	5934	7750	9084	6248	7277	6684	3530	4157	3422	3680	2875	3258			5419	4325	4005	4138	4680	1367	4685	4910	4551	4451	2758	1725	5719	4926
firstTileUTR_00500	4865	7645	7026	5715	5863	5938	2755	2483	2694	3041	2875	3189			2815	3337	3606	3427	5278	1130	4360	4784	4072	4019	2971	1706	6016	5218
firstTileUTR_00501	6672	11012	10884	7653	8723	8526	3869	3893	4297	4480	3619	3968			4818	4613	4441	3001	5986	2188	5531	5695	5577	5461	3494	2113	7038	5952
firstTileUTR_00502	2670	5201	4899	3153	3652	2708	1221	1577	1393	1381	1199	1342			2364	3574	3055	1945	2822	536	2659	2732	2453	2295	1342	815	2732	2363
firstTileUTR_00503	2946	5421	4628	2835	4084	2669	1526	1788	1517	1563	1434	1699			2657	2319	2040	2602	3286	902	3185	3195	2829	2529	1564	1062	3372	2855
firstTileUTR_00504	4493	5967	4290	4505	3195	3478	1992	2443	2199	2474	1834	1999			3169	3030	1893	2485	3008	1280	3753	3976	3491	3419	2044	1339	4346	3767
firstTileUTR_00505	2528	3667	2648	2534	2574	2020	1491	1050	1077	1350	1020	1267			2240	1683	1036	1358	2158	537	2206	2480	2331	2243	1227	768	2385	2124
firstTileUTR_00506	7620	12092	11942	8847	10157	8341	3909	5217	4496	4391	3965	4360			7319	6492	6505	4112	8712	2316	8057	8094	7186	7279	4165	2673	9536	8236
firstTileUTR_00507	9374	15130	13276	11742	11062	9456	4891	6274	5466	5612	4160	4750			8437	8032	6895	5195	9699	1966	8602	9316	8259	8339	4650	2850	10357	8914
firstTileUTR_00508	33	18	0	84	28	104	0	0	10	10	48	59			0	84	52	36	46	3	42	59	109	57	108	62	197	188
firstTileUTR_00509	353	581	488	166	120	246	203	160	108	57	69	96			208	183	0	72	237	29	259	280	235	277	139	87	232	205
firstTileUTR_00510	6833	12099	11560	8996	9728	9448	4358	4214	3820	4049	3674	4313			9567	9663	7843	7502	10579	2884	11083	11439	7499	7274	7209	4041	12211	9904
firstTileUTR_00511	6800	12752	12040	8332	8823	8820	4094	4937	3900	4909	4089	4618			7569	8129	7378	7062	9712	1926	9622	10229	7558	7474	6841	3742	12090	9850
firstTileUTR_00512	8256	17229	14734	8678	13342	8084	5688	5260	4874	5281	5080	5572			9933	11778	10657	7426	13441	2713	14002	14664	10637	10711	9400	5214	16134	13034
firstTileUTR_00513	9861	18034	16069	12015	13746	11307	5918	6243	5879	5790	5579	6323			12250	13176	11114	9881	13924	3405	14978	15846	10263	10605	9902	5377	16661	13828
firstTileUTR_00514	951	1387	1998	1377	1701	1101	647	532	622	432	577	770			2731	2721	3518	2462	4019	1352	4013	4191	3381	3295	2123	1347	4227	3711
firstTileUTR_00515	1835	3030	2251	1109	1366	2019	555	786	778	674	796	940			4605	3973	4311	2454	5157	1601	5551	5401	3880	3754	3012	1634	5796	4829
firstTileUTR_00516	835	1237	1365	713	1367	1294	357	481	261	667	555	608			2541	2815	2636	1335	3222	808	2745	2775	2450	2514	1924	1057	3459	3027
firstTileUTR_00517	1161	1186	1309	1104	1658	1257	446	470	531	542	626	664			3498	2589	2548	1905	3181	1162	2699	3057	2549	2592	2089	1167	4068	3502
firstTileUTR_00518	5805	10203	7035	6340	6586	6308	2850	3719	3479	3269	3151	3349			7274	5844	5346	4245	6607	2110	7102	7459	6011	6126	4336	2523	7789	6247
firstTileUTR_00519	3270	6413	6158	4479	4481	4466	2201	2075	2196	1966	1630	1910			3475	3457	4207	2509	5427	1447	4337	4600	4261	4316	2466	1478	4238	3321
firstTileUTR_00520	4192	7583	6165	4480	6185	4350	2307	2520	2049	2323	2002	2326			5534	5234	4476	2899	7630	1339	6942	6718	6087	5800	3619	2049	7118	6302
firstTileUTR_00521	2297	5140	3498	3519	3305	3190	2089	1292	1545	1696	1149	1307			3774	3529	3406	2538	4336	949	4604	4690	3952	3956	2068	1256	4153	3655
firstTileUTR_00522	6340	10341	9569	7144	7354	7613	4347	4328	3307	4363	3308	3741			11377	7790	8761	5569	10834	2386	11060	11558	9549	9236	6369	3497	12318	10580
firstTileUTR_00523	6333	11868	9545	8566	8496	6433	3933	4760	3499	3679	3354	3694			9690	9195	8286	8167	11089	3640	12342	12144	9954	10031	6402	3534	12626	10554
firstTileUTR_00524	6940	9960	10378	8257	7402	8351	3716	3830	3990	4114	3580	4113			8903	7401	7586	7590	8648	2286	9259	9156	8248	8106	5671	3191	12276	10439
firstTileUTR_00525	5697	10288	8970	6468	7249	7973	3434	3728	3465	3533	3547	3983			7506	7727	6183	7049	7984	2088	8828	8644	7681	7183	5325	3083	12175	10114
firstTileUTR_00526	749	875	978	1313	1063	618	240	409	387	473	237	289			1363	822	1236	1897	1605	251	996	998	1362	1592	383	327	917	802
firstTileUTR_00527	780	1799	1589	1547	1448	1453	507	924	509	607	633	663			811	1160	1932	1083	1424	389	1458	1324	1450	1615	745	562	1811	1583
firstTileUTR_00528	2655	4092	4492	2645	3427	3679	1294	1680	1211	1613	1199	1392			4216	4949	5239	3646	6182	1484	5819	6077	6098	5923	1961	1545	5104	4320
firstTileUTR_00529	1524	3113	3148	1512	2099	2638	886	1358	858	941	880	1009			3559	2575	3334	2765	2883	1069	3529	3524	3483	3291	1265	1070	3590	2755
firstTileUTR_00530	873	1559	1465	1066	948	984	416	714	579	417	522	620			1941	2132	1075	993	1691	575	1674	1604	1609	1644	730	639	2113	1686
firstTileUTR_00531	5676	8639	8766	6737	8072	7069	3254	3635	2722	3053	2986	3427			10628	8424	9426	8075	10082	2096	10495	11213	9866	9697	4619	3480	10769	9354
firstTileUTR_00532	1288	1859	2017	1379	1003	1059	564	771	520	527	549	636			487	615	730	341	648	254	649	734	497	522	398	245	852	637
firstTileUTR_00533	795	1883	1249	1392	1362	628	528	745	567	552	486	591			220	906	291	397	564	49	613	662	548	613	349	221	716	586
firstTileUTR_00534	44	87	166	1	48	0	0	0	12	1	36	50			0	159	96	583	243	0	249	246	58	64	139	114	261	275
firstTileUTR_00535	0	213	21	2	110	126	47	25	23	51	21	18			240	649	186	6	529	164	409	367	551	520	103	51	211	84
firstTileUTR_00536	2119	3997	2560	2849	2814	2507	1286	1237	1002	1300	1188	1408			2072	1547	1706	1434	1734	601	2285	2442	2056	1967	1661	1020	2962	2370
firstTileUTR_00537	1665	2729	2101	2026	2142	1231	1113	806	858	1045	975	1090			1667	1222	993	1572	1269	254	1687	1777	1571	1525	1229	782	2284	1820
firstTileUTR_00538	2419	4437	3294	3051	3365	2855	1429	1137	1191	1360	1221	1337			3007	3037	1988	1164	2862	744	2733	3435	2131	2114	1848	993	3061	2552
firstTileUTR_00539	2466	3737	2494	2602	2967	2410	1309	1373	1023	1627	1346	1550			2600	2304	1952	2103	2557	647	2816	2816	2221	2371	2035	1110	3379	2826
firstTileUTR_00540	4202	7458	6630	4899	6182	4664	3629	3072	2475	2386	2176	2355			8396	5867	5822	5982	8230	1858	8889	9651	8087	8024	3920	2628	7199	6085
firstTileUTR_00541	3077	4189	4295	3049	3309	2353	1589	1358	1303	1363	1669	1754			5427	3804	4231	3785	5358	1252	5487	5701	5119	5070	3158	2102	5952	5109
firstTileUTR_00542	395	573	551	422	370	699	193	268	106	150	173	207			703	628	503	327	431	131	636	592	465	351	316	170	673	647
firstTileUTR_00543	404	591	744	395	422	459	177	248	191	103	186	256			319	549	310	318	373	260	499	586	501	566	298	212	773	559
firstTileUTR_00544	420	378	796	495	574	707	284	462	218	276	265	264			697	190	495	285	718	141	495	605	448	477	451	244	947	801
firstTileUTR_00545	292	574	477	486	366	638	190	206	135	415	198	233			521	332	286	168	450	121	417	488	447	434	205	154	574	539
firstTileUTR_00546	338	494	424	354	371	565	85	237	225	199	185	167			190	204	367	245	463	303	530	425	345	424	228	102	486	378
firstTileUTR_00547	1587	1940	2158	872	1703	783	598	809	665	825	514	598			4372	3064	3094	2153	3688	950	3800	3838	3295	3178	1791	984	3502	3015
firstTileUTR_00548	675	1072	686	700	895	610	261	297	184	320	368	367			2304	2179	1233	1118	1971	656	1761	1706	1648	1684	1149	701	2116	1906
firstTileUTR_00549	1209	1927	1986	1289	1510	1649	606	701	653	627	670	818			2717	3156	3094	1586	4107	1163	3980	3711	3300	3136	2290	1339	4417	3940
firstTileUTR_00550	397	876	799	309	879	1013	240	340	330	318	307	342			1359	1362	1639	1141	2052	783	1621	1750	1313	1270	1061	641	2013	1854
firstTileUTR_00551	1784	2431	2806	2024	2632	1730	1461	1085	894	958	732	904			1361	933	819	1203	1115	272	1383	1234	841	960	752	433	1480	1161
firstTileUTR_00552	1811	2646	2118	1193	1719	1890	728	1015	742	1151	790	886			1041	646	618	300	1362	339	1122	1128	933	936	676	422	1483	1151
firstTileUTR_00553	43	387	25	298	113	118	59	106	64	159	20	27			74	37	46	503	17	27	181	157	92	68	33	22	70	72
firstTileUTR_00554	191	268	159	193	163	25	152	0	35	27	33	48			143	67	222	470	131	124	71	142	122	86	70	48	119	122
firstTileUTR_00555	25555	46195	40166	29008	33344	29288	14927	17802	14656	14944	14020	15616			18941	16590	15117	12853	19854	6365	18514	20152	16944	17611	11724	6988	21439	18291
firstTileUTR_00556	19813	35972	30111	22660	26017	23825	12291	13884	10671	11509	10929	12856			15429	11563	11779	10885	14035	5500	14400	15022	13675	13726	9422	5727	17399	15119
firstTileUTR_00557	24895	40244	35547	30163	33938	29413	14422	15994	13098	13373	12682	14813			16866	14829	12571	15872	15851	6265	16564	17348	14695	15229	9839	6251	18762	16514
firstTileUTR_00558	18084	30495	29381	24601	23753	22422	10621	11910	10015	12193	9996	11127			11380	12757	8527	9593	12622	5116	12813	12914	12485	12351	7866	4619	14420	12513
firstTileUTR_00559	4755	6875	6824	4925	5313	5195	2705	3248	2473	2286	2362	2747			4585	3798	3735	3348	4528	863	4509	4503	3731	4047	2575	1599	5283	4632
firstTileUTR_00560	3902	5551	5697	5611	5111	4335	2836	1977	2470	2263	2070	2292			3209	2935	3040	3004	3743	1087	4442	4583	3770	3672	2299	1411	4885	4072
firstTileUTR_00561	621	345	515	614	573	525	313	138	159	187	178	227			643	318	775	481	551	249	566	614	612	506	351	249	644	632
firstTileUTR_00562	612	716	483	918	785	518	322	343	334	530	278	319			496	386	355	2	781	226	841	744	631	638	378	262	821	763
firstTileUTR_00563	0	0	0	0	0	0	12	0	21	0	7	5			0	0	0	0	0	0	2	3	19	10	7	3	13	17
firstTileUTR_00564	0	160	0	0	0	0	10	3	13	0	4	2			94	58	0	0	47	0	7	28	122	162	6	10	6	13
firstTileUTR_00565	0	0	0	0	0	0	0	0	0	0	0	2			0	0	0	0	0	0	0	0	0	0	4	7	4	3
firstTileUTR_00566	0	0	35	0	0	0	0	0	0	0	4	0			0	0	0	0	0	0	7	10	3	0	4	0	7	3
firstTileUTR_00567	0	0	0	0	0	0	0	0	0	0	6	2			0	0	0	0	0	0	6	4	16	5	7	2	13	8
firstTileUTR_00568	49	0	20	51	1	36	13	0	45	111	147	151			298	107	325	0	34	0	81	54	86	177	221	165	469	394
firstTileUTR_00569	35	0	130	0	45	0	36	5	0	35	10	16			0	0	0	1	28	0	12	4	12	20	8	7	23	14
firstTileUTR_00570	0	0	0	52	0	0	0	0	0	0	19	11			0	45	0	0	0	0	6	0	0	6	12	9	9	10
firstTileUTR_00571	33	0	111	97	78	0	38	66	11	52	39	39			0	13	60	0	5	0	28	8	67	42	45	34	50	52
firstTileUTR_00572	197	247	58	113	133	264	81	28	52	28	48	45			62	76	74	223	15	0	76	46	73	49	19	20	53	38
firstTileUTR_00573	214	243	371	171	170	372	233	134	227	324	133	129			0	137	2	1	67	47	69	108	165	145	62	55	211	197
firstTileUTR_00574	304	579	509	562	572	447	220	196	383	194	194	192			254	175	713	3	227	75	196	186	196	228	95	59	217	201
firstTileUTR_00575	243	383	218	310	467	438	217	76	134	85	122	183			352	227	67	71	122	56	131	143	123	108	93	70	236	200
firstTileUTR_00576	102	87	27	201	221	55	3	42	30	86	24	49			65	3	0	0	25	82	15	48	17	22	20	11	73	48
firstTileUTR_00577	64	205	386	343	357	77	189	116	71	165	101	103			0	82	87	215	77	98	198	129	144	151	69	51	168	198
firstTileUTR_00578	402	798	763	494	603	191	273	296	234	157	270	369			107	83	239	138	150	53	186	133	171	209	140	99	309	293
firstTileUTR_00579	7790	14145	14274	10522	11616	11115	5318	5974	4363	5041	4900	5401			8625	6652	6588	5922	9031	3955	8883	9431	7674	7467	4875	3319	9600	7909
firstTileUTR_00580	8120	13475	12274	10560	9927	10385	5817	4832	4342	4980	4344	5069			7252	6577	6112	6354	8132	2169	7892	8721	8247	8371	4618	2961	8842	7668
firstTileUTR_00581	40	208	116	74	221	90	77	144	87	0	101	97			168	189	44	334	232	45	132	190	81	62	119	57	233	226
firstTileUTR_00582	1726	2692	2058	1833	1800	2200	1045	696	774	958	970	1016			2512	1677	1704	2227	2366	378	2260	2573	2300	2051	1747	1018	3820	3219
firstTileUTR_00583	0	0	0	0	0	0	0	0	0	0	3	0			0	0	0	0	0	0	0	0	0	0	0	1	0	0
firstTileUTR_00584	0	0	0	0	0	0	0	0	0	0	7	5			0	0	0	0	0	0	0	0	0	0	10	4	16	2
firstTileUTR_00585	0	18	0	27	1	38	33	24	0	0	11	16			0	0	0	0	12	0	15	26	50	29	15	8	7	27
firstTileUTR_00586	1369	2907	2009	2032	3243	2049	917	879	733	932	825	1017			3248	3033	2859	2621	3950	1478	3983	4186	3262	3256	2035	1256	4649	4207
firstTileUTR_00592	334	946	728	413	431	444	219	129	211	178	161	184			428	321	267	229	625	199	525	483	408	432	206	138	447	405
firstTileUTR_00593	522	556	761	433	401	204	146	277	171	217	241	267			652	156	222	583	349	178	469	533	399	407	321	170	699	549
firstTileUTR_00594	174	391	187	174	234	65	57	166	97	114	99	104			74	177	6	212	309	0	233	232	200	158	121	70	262	219
firstTileUTR_00595	553	1068	727	662	556	532	445	399	302	321	350	459			865	497	820	399	833	99	607	597	555	531	450	323	1125	879
firstTileUTR_00596	269	414	535	387	255	291	187	111	83	162	170	196			413	331	370	160	229	108	450	527	166	274	196	117	460	336
firstTileUTR_00597	1955	2920	2791	2214	2595	1894	1180	1680	1430	1341	1340	1482			2716	1989	1594	1985	2479	832	2353	2396	2400	2716	1856	1019	3670	3032
firstTileUTR_00598	3361	6061	4418	3626	4307	3510	2040	2404	1486	1862	1857	2018			3450	3747	3929	4109	3501	1290	3462	3560	3246	3281	2684	1521	5138	4399
firstTileUTR_00599	2604	2954	3203	1643	2894	2281	1408	1425	1562	1539	1130	1206			2231	1247	2736	1297	2765	667	2521	2932	2059	2015	1690	923	3116	2782
firstTileUTR_00600	6411	10794	9136	7225	8842	7246	3693	4179	3746	4633	3552	4116			7439	5890	4911	5187	6410	2313	6505	6414	5477	5680	4482	2617	8803	7089
firstTileUTR_00601	1917	4004	3458	2168	3281	1846	1181	1035	1318	1160	1058	1202			2124	2175	2078	1606	2480	355	2125	2063	1954	1655	1626	892	3014	2476
firstTileUTR_00602	6913	10946	11802	10228	9176	7859	4580	4256	5178	5425	3932	4471			6759	6550	4604	5992	7158	1815	6756	7375	5980	6084	4690	2689	8715	7372
firstTileUTR_00603	1126	1616	1769	1733	1254	1257	546	464	656	966	617	891			2721	2416	2844	1100	1928	574	2762	2614	2271	2253	1603	1012	3049	2491
firstTileUTR_00604	868	1056	940	1203	814	618	441	684	242	333	503	557			1477	1295	1400	1091	1815	131	1778	1870	1592	1447	1024	606	1989	1753
firstTileUTR_00605	1010	1815	2300	892	1444	1176	570	571	624	840	634	554			901	1899	1539	1739	1702	303	2082	1943	2069	1885	1180	636	1953	1823
firstTileUTR_00606	426	608	1771	476	652	568	340	283	124	569	354	336			1247	444	1087	697	916	232	985	1024	1283	1134	619	312	1020	921
firstTileUTR_00607	2762	3503	3286	2325	3440	2668	1576	1425	1396	1473	1204	1366			3032	2401	2668	2600	4157	1332	3433	3646	2853	2887	2266	1367	4336	3430
firstTileUTR_00608	2668	4920	3363	2687	3187	3157	1155	1550	1072	1860	1112	1186			3590	3988	2896	1643	4125	889	4490	4785	3813	4146	2069	1184	3738	3290
firstTileUTR_00609	1748	3550	2615	2697	1799	1748	1225	1280	951	1331	1088	1235			2640	2056	2203	2106	2180	516	3168	3027	2547	2652	1679	1038	3426	2866
firstTileUTR_00610	1796	3845	3491	1691	3197	2868	1188	1526	1264	1519	1161	1325			2012	2984	2160	2039	4188	1206	3969	3813	3033	3182	2013	1194	3611	3278
firstTileUTR_00611	2973	4122	4420	2501	3603	2755	1904	1778	2066	1738	1292	1400			4058	2913	2391	2779	4513	1136	4138	3994	3621	3612	1996	1254	3794	3467
firstTileUTR_00612	290	251	522	114	296	182	44	50	275	76	124	133			296	269	46	0	169	172	164	154	126	162	97	64	233	169
firstTileUTR_00613	154	617	489	235	544	214	238	210	190	194	102	98			156	83	277	90	96	1	210	189	95	125	63	44	186	132
firstTileUTR_00614	91	307	47	70	211	0	25	0	34	77	30	34			236	41	121	292	50	0	18	41	89	64	36	26	71	53
firstTileUTR_00615	3212	5782	6498	4770	5289	5303	2264	2374	1893	2643	2080	2395			2817	4069	3829	3424	4812	1208	4007	4338	4132	3946	2228	1438	4310	3768
firstTileUTR_00616	1513	2577	2197	1580	1719	1652	776	798	609	1029	646	734			1920	1266	756	631	2066	530	1855	2216	1745	1837	1093	626	2095	1731
firstTileUTR_00617	2459	2462	3741	2420	2706	3516	1504	1476	1115	1137	1205	1306			2881	2831	2748	1870	3117	813	3693	3674	3042	2934	2062	1117	3730	3463
firstTileUTR_00618	236	653	490	694	640	274	150	268	78	300	130	174			198	363	429	529	1038	256	551	550	586	656	323	225	597	490
firstTileUTR_00619	20	238	382	179	58	133	46	0	31	62	69	97			137	372	184	47	58	97	192	222	105	150	178	129	345	227
firstTileUTR_00620	1864	3813	2805	2560	2164	2123	1075	1107	913	955	1007	1057			2559	2061	2318	2603	2683	1033	2835	3004	2322	2365	1451	896	2743	2359
firstTileUTR_00621	1811	2761	2599	2253	2355	1658	937	880	1004	1258	906	1109			3055	2235	1810	1782	2787	827	2717	2911	2575	2534	1583	995	2854	2440
firstTileUTR_00622	1321	1631	1598	1087	1538	1476	656	369	312	685	594	704			970	943	1086	759	1509	405	1323	1374	1301	1365	967	597	1584	1401
firstTileUTR_00623	2016	3145	2771	2399	2097	2180	700	1655	1032	1288	1232	1253			1935	2730	1694	1360	2454	841	2952	3151	2607	2492	1791	1021	3277	2856
firstTileUTR_00624	2081	3407	3868	2276	2753	2956	1534	1261	1246	1026	1041	1149			2751	2627	2703	2492	3403	670	3211	3145	2405	2387	1544	950	2747	2270
firstTileUTR_00625	1355	3036	2375	2236	1809	1687	871	866	1020	964	776	922			1745	2603	2188	1132	2153	698	2772	2691	2176	2049	1362	810	2785	2347
firstTileUTR_00626	1045	1565	2231	1057	1511	1108	549	653	737	687	559	658			1782	1247	1628	1167	1743	423	1787	1823	1423	1422	952	603	2087	1698
firstTileUTR_00627	1826	2438	2519	2126	1994	1552	936	1046	846	1023	846	928			1557	1660	2526	1759	2970	354	2690	2392	2267	2188	1463	879	3043	2708
firstTileUTR_00628	1965	2496	2401	1289	1473	1682	867	1027	952	911	751	874			1406	1423	2446	1694	2054	697	2471	2646	2017	1841	1374	759	2322	2239
firstTileUTR_00629	8354	14402	13714	7863	10300	9137	4020	4694	3975	4255	3617	4431			9912	8847	8584	6169	9991	3231	9901	10890	9025	8539	4729	2871	10147	8795
firstTileUTR_00630	8203	13484	14319	10687	11404	9300	4257	5433	4694	5244	3808	4506			9216	8343	8746	7328	11474	2745	9978	10490	9789	10304	4798	2941	9744	8590
firstTileUTR_00631	14945	24704	23562	16741	19468	17510	8166	9831	8502	9529	7818	8782			11563	10015	9668	7822	11756	3835	11409	12018	11514	11232	6634	4381	12681	10510
firstTileUTR_00632	14028	21602	22917	17874	20251	19088	8450	10149	7875	7904	7524	8335			10990	9359	8451	8632	13662	4559	12035	12552	11375	10909	6453	4428	12808	10736
firstTileUTR_00633	1996	4201	4454	2258	3352	2242	1118	1815	1320	1532	1122	1206			2544	2363	2305	938	3268	1055	2908	3145	2513	2673	1825	1069	3566	3215
firstTileUTR_00634	2925	4450	3332	3305	3627	4194	1711	1627	1352	1420	1400	1628			2204	3074	2295	2357	3829	1125	3419	3587	3098	3030	2202	1380	4366	3760
firstTileUTR_00635	2055	3369	4211	2705	3792	2858	1572	1170	1380	1314	1266	1334			2302	2638	2502	2185	3826	1129	3301	3737	3093	3018	2185	1270	4072	3615
firstTileUTR_00636	2538	4563	3890	3096	3886	2789	1472	1913	1579	1788	1655	1741			3158	2948	4201	3041	4043	1312	3271	3518	3454	3438	2797	1701	5191	4482
firstTileUTR_00637	3327	4542	5629	4816	5298	4968	2101	2667	2110	2519	2000	2236			4211	3629	3724	3832	5763	1706	5471	5495	5023	5012	3562	2067	6602	5900
firstTileUTR_00638	186	129	132	0	43	17	6	40	0	33	1	1			0	58	90	76	10	0	32	37	39	50	4	1	12	12
firstTileUTR_00639	0	0	0	0	0	0	0	0	0	0	0	3			0	0	0	0	0	0	0	0	0	0	5	0	4	1
firstTileUTR_00640	0	0	0	0	0	0	0	0	0	0	0	1			0	0	0	0	0	0	0	0	0	0	0	0	0	0
firstTileUTR_00642	0	25	0	0	0	0	0	0	0	0	9	5			101	47	0	0	0	38	22	9	15	9	6	7	13	25
firstTileUTR_00643	0	0	0	29	0	0	0	0	0	0	2	7			0	0	0	0	27	0	0	0	6	15	1	4	7	12
firstTileUTR_00644	0	0	43	73	0	0	0	28	0	0	17	13			0	0	0	0	0	0	10	0	10	18	8	3	27	16
firstTileUTR_00645	0	0	0	0	0	0	0	0	0	0	4	8			0	0	0	0	0	0	0	0	0	0	4	3	2	6
firstTileUTR_00646	0	33	41	0	0	0	0	0	0	0	0	0			0	0	0	0	0	0	0	0	0	4	1	0	1	0
firstTileUTR_00647	38	54	31	0	0	30	37	13	39	23	15	12			0	0	0	0	0	0	8	8	40	14	6	5	14	17
firstTileUTR_00653	1682	3648	3297	2038	2299	2443	1825	1489	942	1184	989	1141			1389	1616	1428	848	1676	574	1868	1833	1702	1513	957	568	1743	1622
firstTileUTR_00654	1438	2320	2145	2022	1826	1355	1215	981	1319	715	866	951			621	1305	1044	1361	1196	490	1425	1717	1591	1584	780	497	1580	1322
firstTileUTR_00655	5866	9369	7256	6607	8028	8395	2962	3173	3147	3324	2840	3254			4561	4199	4564	3752	5717	1768	5721	5759	5681	5567	3092	1920	6025	5309
firstTileUTR_00656	5362	8862	6701	6196	6990	5544	2661	3705	3027	3482	2770	3160			4464	4525	3400	3747	5681	1335	5368	5665	5060	5197	2973	1786	5822	5308
firstTileUTR_00657	13454	24021	23761	17124	19333	16033	8332	9306	8179	9208	7255	8308			10132	9348	8634	7790	10320	3846	9625	10108	10374	10296	5450	3726	10969	9360
firstTileUTR_00658	11662	19500	17220	14712	13929	12152	6579	7273	5658	6515	5800	6582			9326	7911	6544	8306	7492	2389	8066	8955	8565	8701	4613	3136	9649	7999
firstTileUTR_00659	177	401	477	543	380	230	149	38	169	215	141	168			0	178	256	179	327	7	307	327	218	191	159	105	303	294
firstTileUTR_00660	892	1743	1509	1728	1278	1397	416	538	782	445	730	812			826	759	1022	846	690	208	962	891	726	809	826	461	1472	1309
firstTileUTR_00661	35	46	179	45	292	159	57	43	96	102	53	74			65	102	76	0	175	0	55	80	141	119	81	27	164	150
firstTileUTR_00662	136	152	97	123	382	246	15	81	38	84	80	86			76	40	54	70	209	0	120	184	187	184	79	43	201	169
firstTileUTR_00663	1442	2586	1763	1832	1409	1920	1092	691	763	479	601	776			2334	1130	842	1591	1340	634	1661	1436	1224	1463	703	460	1405	1144
firstTileUTR_00664	1259	2805	2174	1798	2633	2269	780	1263	805	1427	784	895			2378	1534	1675	993	1934	467	1982	1962	1791	1878	951	600	1794	1590
firstTileUTR_00665	1095	2450	1874	1250	1721	1003	702	439	605	772	529	647			1013	1150	921	715	1201	450	1003	952	1095	1000	693	394	1169	1054
firstTileUTR_00666	1489	2520	2589	1253	2582	1784	993	883	907	632	727	879			1238	1303	1874	1286	1295	187	1465	1574	1218	1219	890	519	1581	1276
firstTileUTR_00667	794	1609	1727	1214	1527	1279	860	940	697	945	610	731			420	775	516	735	1461	451	1232	1180	884	879	662	427	1358	1153
firstTileUTR_00668	113	452	135	143	186	276	3	26	24	78	66	87			89	117	150	143	121	37	74	112	101	83	70	32	177	146
firstTileUTR_00669	63	166	106	48	52	159	52	76	72	36	59	79			62	0	253	0	128	162	109	102	132	155	86	49	145	131
firstTileUTR_00670	4797	8492	7602	4648	6191	5149	3015	3159	2204	2895	2695	2771			4089	4522	2923	3352	5495	1595	4869	5096	4590	4568	2933	1883	5338	4579
firstTileUTR_00671	4001	7069	5948	6249	5310	4053	2731	3281	2035	2242	2032	2296			4773	4358	2693	3109	4587	1357	4691	4738	4243	3923	2465	1570	4353	3841
firstTileUTR_00672	8481	17527	13128	11980	12801	10751	5035	6395	5542	5881	4373	5012			6574	7427	6285	5964	8421	2637	7344	7715	6995	6765	4087	2512	9514	7818
firstTileUTR_00673	7544	14975	11605	10293	11783	11698	5175	5934	4645	5802	4356	5070			7958	6618	7899	4493	9960	2356	8596	8815	8273	7666	4771	2995	11393	9664
firstTileUTR_00674	7814	13824	12955	10076	11584	8112	4946	5077	4316	4651	3900	4412			7579	5657	5955	3524	7483	1670	7351	7638	6357	6498	4047	2464	9334	8065
firstTileUTR_00675	8924	15315	13995	10595	13724	9445	5835	5775	5692	6241	4529	5237			9072	9019	9474	7098	11607	3585	11476	11907	9413	9313	6073	3534	13511	11745
firstTileUTR_00676	0	38	85	0	0	0	20	0	0	0	11	7			0	2	0	30	0	73	12	12	0	8	13	6	18	8
firstTileUTR_00677	152	57	282	177	211	0	0	21	153	67	20	35			62	88	520	0	66	0	46	64	49	53	19	12	39	43
firstTileUTR_00678	0	0	0	0	0	0	0	0	0	0	15	10			0	0	0	0	7	0	14	12	58	18	11	7	25	14
firstTileUTR_00679	0	93	42	125	45	88	1	132	226	88	17	21			103	57	225	87	77	0	52	66	53	32	26	18	22	31
firstTileUTR_00680	0	0	0	0	0	0	0	0	0	0	3	0			0	0	0	0	0	0	0	0	0	0	3	2	8	8
firstTileUTR_00681	97	140	154	140	35	179	39	24	59	98	6	6			60	55	154	1	222	176	50	70	127	113	6	6	23	21
firstTileUTR_00682	209	220	241	50	246	0	0	62	15	75	31	39			244	115	127	0	76	0	29	29	41	58	20	21	51	57
firstTileUTR_00683	11	0	93	98	34	161	0	82	0	63	25	29			0	0	32	0	39	0	37	33	47	79	36	17	61	42
firstTileUTR_00689	18164	31013	27591	23814	25890	21960	12163	11844	10218	11868	8254	9817			17861	18220	16263	14925	22773	6692	21633	22601	21073	21143	9758	6184	19496	16586
firstTileUTR_00690	20404	37615	33499	23925	27020	25694	13247	13605	11827	14925	9025	10395			23942	20307	19786	16054	23565	7847	23870	24346	23862	23864	11015	6863	21288	18775
firstTileUTR_00691	3938	6313	6483	5224	5091	4656	2313	1910	1915	1980	2730	3148			3749	3673	2768	2164	4624	1321	4153	4267	3871	3727	3213	1948	5846	5018
firstTileUTR_00692	4866	7602	5291	4837	7075	3398	2927	3172	2416	2437	2653	3077			5188	4609	4531	3085	5152	1932	5033	5070	4627	4718	3196	1931	6090	5273
firstTileUTR_00693	4076	7088	7504	5196	5072	4317	2265	2482	2161	2412	2700	2964			3441	3474	3164	3926	3688	1240	4219	4435	3621	3771	2870	1781	5264	4746
firstTileUTR_00694	5826	9145	8487	6594	6984	6434	3382	3655	2977	3039	3642	4012			5063	4698	3979	5189	4578	2072	5778	5667	5377	5394	3820	2402	6562	6042
firstTileUTR_00695	1918	3288	2935	2018	2816	2163	1125	1331	895	1001	1068	1171			2047	1916	1482	1843	2225	375	2741	2868	1905	2115	1417	796	2862	2604
firstTileUTR_00696	1606	2958	2711	1949	1910	1949	906	900	656	920	844	928			1545	1554	1726	1751	1999	1091	1895	1925	1714	1897	1152	670	2418	2107
firstTileUTR_00697	1366	2529	2037	1562	1826	1621	764	830	447	813	598	593			1629	1275	1834	493	1446	438	1538	1541	1157	1171	789	444	1566	1253
firstTileUTR_00698	1620	2911	2442	1929	2231	1645	568	1128	622	1062	871	936			1197	1902	1410	975	2082	433	1548	1423	1433	1426	1129	652	2342	1942
firstTileUTR_00699	1481	1998	1675	1569	2300	974	819	788	696	725	801	940			1378	1139	704	1000	1875	326	1346	1466	1264	1309	1045	587	2110	1811
firstTileUTR_00700	875	1504	1646	1305	1617	964	590	618	526	677	612	708			558	1265	1378	523	1153	391	1514	1535	1259	1164	830	471	1821	1374
firstTileUTR_00701	740	1177	1798	1218	898	638	665	720	548	431	398	454			659	391	710	634	558	55	584	537	627	493	270	180	495	421
firstTileUTR_00702	861	1608	1100	864	1262	970	581	550	417	480	543	606			748	762	534	864	658	141	637	515	760	574	340	239	593	590
firstTileUTR_00703	329	568	1099	191	716	383	344	547	327	358	379	393			367	251	319	141	314	173	387	405	359	400	251	167	530	444
firstTileUTR_00704	1218	1866	1459	666	1259	963	526	626	689	755	583	604			1065	516	512	646	438	121	643	500	751	875	432	268	753	676
firstTileUTR_00705	874	1591	1613	1027	944	1384	406	505	642	689	537	577			1044	616	149	497	369	58	700	534	544	555	328	250	636	540
firstTileUTR_00706	1316	1447	1618	901	1486	1231	525	547	796	728	423	428			594	391	345	270	464	798	698	743	651	568	303	185	560	457
firstTileUTR_00707	913	1570	1613	1148	1524	1248	476	419	553	512	494	539			452	287	359	235	434	341	544	431	552	551	319	234	642	523
firstTileUTR_00708	1819	2520	2424	2365	2414	1806	635	1436	792	694	949	996			1529	1670	1720	1707	1692	506	2044	2061	1750	1683	1223	721	2150	1836
firstTileUTR_00709	805	1798	2003	1969	1681	1925	620	979	826	1043	799	898			1136	1603	1893	1412	1530	481	2001	2140	1551	1657	1084	678	1992	1732
firstTileUTR_00710	1039	2532	2768	1942	1808	1829	883	916	769	986	843	888			1045	1944	1463	1066	1837	687	1979	2121	1845	1618	1136	728	2153	1647
firstTileUTR_00711	1388	2325	2624	1705	1348	795	581	620	666	703	905	897			1453	1442	1195	1231	1221	181	1775	1813	1532	1473	1273	745	2171	1935
firstTileUTR_00712	478	1566	688	1030	874	607	369	395	317	372	434	563			1502	1315	866	879	1088	367	1568	1597	1259	1227	1267	713	2198	1947
firstTileUTR_00713	1540	1588	1445	1128	1836	1045	841	924	682	689	532	615			2294	1453	2053	2247	2170	528	2504	2732	2235	2198	1467	771	2497	2293
firstTileUTR_00714	631	1028	613	879	960	698	366	725	473	307	440	498			1897	988	540	1901	1508	247	1694	1862	1392	1255	991	517	1903	1616
firstTileUTR_00715	651	1459	980	988	854	1236	599	315	455	360	483	523			1120	1112	1133	844	1573	353	1753	1745	1404	1161	1200	658	1932	1873
firstTileUTR_00716	1493	1956	1254	1576	1035	1417	683	1013	460	665	528	515			1088	1504	1179	1465	2012	716	3078	2851	1763	1932	1473	766	2541	2199
firstTileUTR_00717	0	0	0	0	0	0	22	0	0	24	16	20			0	0	55	0	0	0	14	21	0	0	21	24	32	34
firstTileUTR_00718	21	0	0	0	0	0	4	0	0	0	26	22			0	56	304	1	101	0	49	82	12	15	56	30	85	104
firstTileUTR_00719	0	27	0	56	18	25	0	0	17	22	10	13			38	0	31	0	14	0	93	81	50	82	34	25	92	76
firstTileUTR_00720	0	0	0	0	0	0	0	0	0	0	4	6			0	0	0	0	0	0	0	0	0	0	6	7	17	20
firstTileUTR_00723	6287	9498	8032	5476	6367	6403	3287	3202	2690	3043	2934	3279			3697	3824	3328	2128	3827	1202	3733	4051	3710	3367	2164	1329	4343	3744
firstTileUTR_00724	8047	14134	12856	9187	11034	8334	4674	5374	3556	4979	4372	4893			4421	4338	5372	2570	5708	1042	5665	5656	4801	4334	3100	1916	6398	5584
firstTileUTR_00725	4949	9801	8673	6133	7242	7271	2934	3729	3146	3758	2957	3225			3292	3473	3443	1647	3686	887	3309	3878	3332	3289	2092	1294	4426	3685
firstTileUTR_00726	6494	10869	9682	7166	8350	7360	3959	4272	3507	3697	3569	4099			2959	4241	4229	2655	4380	965	4262	4518	3562	3700	2502	1512	5074	4489
firstTileUTR_00727	57	136	175	152	150	249	82	48	94	81	117	138			0	165	141	19	144	144	317	304	222	228	209	105	408	360
firstTileUTR_00728	147	244	105	473	272	111	58	175	97	99	130	129			290	77	4	228	234	55	209	239	182	231	222	127	455	370
firstTileUTR_00729	277	213	445	188	249	249	199	110	36	85	131	169			460	356	57	2	186	1	227	220	335	332	193	112	379	317
firstTileUTR_00730	47	237	173	125	86	198	54	67	23	86	91	114			231	167	73	506	182	91	130	151	174	140	148	109	317	282
firstTileUTR_00731	73	183	283	131	176	22	27	49	161	38	40	27			297	75	227	70	301	0	79	58	124	146	54	41	99	96
firstTileUTR_00732	750	1041	1118	783	796	429	320	227	320	444	274	284			153	259	396	339	276	41	272	324	410	413	208	140	368	320
firstTileUTR_00733	1444	1557	1215	879	796	791	723	370	747	586	499	521			691	389	405	429	542	312	415	576	512	643	387	228	680	576
firstTileUTR_00734	320	151	425	171	213	318	115	106	74	15	152	145			282	228	61	192	178	0	213	242	145	199	180	91	366	277
firstTileUTR_00735	287	533	646	657	236	181	249	242	84	143	117	117			411	308	152	290	192	117	235	196	171	216	139	74	255	223
firstTileUTR_00736	103	0	71	0	0	35	9	27	27	143	38	42			149	0	0	159	24	0	7	14	46	51	37	24	71	50
firstTileUTR_00737	179	96	278	251	69	162	25	91	132	89	78	59			186	34	53	173	156	18	127	137	170	131	56	49	130	124
firstTileUTR_00738	1767	1890	1369	1339	1472	1277	820	805	948	545	744	778			2267	2669	2609	1782	3265	730	3507	3891	2733	2442	1948	1059	3816	3249
firstTileUTR_00739	1727	2704	2606	1791	1982	1963	771	1124	872	1279	922	1035			1787	4098	3236	3469	4451	993	3380	3662	2958	2900	2360	1498	4734	4150
firstTileUTR_00740	1648	3126	2101	1381	2734	1876	1065	1350	570	1236	836	936			3070	3197	2780	3167	4632	1141	4352	4570	3566	3307	2276	1402	4827	3984
firstTileUTR_00741	876	2605	1614	1258	887	2107	734	1049	842	545	668	827			3195	3517	1873	2927	3191	887	3454	3638	2647	2448	2095	1172	4191	3777
firstTileUTR_00742	11366	18775	17486	11898	13296	13442	6757	7795	6421	5821	5751	6404			8443	8078	6582	6452	8591	3071	10268	10781	8111	8680	5377	3109	10724	9314
firstTileUTR_00743	7454	12009	11474	9414	10481	9422	4327	5020	4275	4603	4650	5032			4969	6432	5270	4980	5516	1843	5862	6422	5355	5157	4015	2364	8300	7204
firstTileUTR_00744	11164	16598	18130	12116	14908	11915	6335	6639	5988	6860	5638	6519			9792	7255	8632	6669	8772	2996	9328	9944	8402	8009	5207	3247	11292	9306
firstTileUTR_00745	12213	21034	18174	14415	15818	15373	7072	8086	6190	7602	6208	7306			9785	8976	9154	7088	10492	3172	11652	11285	9127	9904	6125	3675	13094	10977
firstTileUTR_00746	10805	19615	15962	11932	13278	12480	6078	7363	5988	6848	6331	7046			9769	10255	8215	6009	10411	2611	10083	10807	9169	9689	6539	4028	13527	11481
firstTileUTR_00747	7300	11616	10180	9794	9649	7540	4103	4442	4368	4409	3741	4297			6166	6006	4629	6488	6711	1743	6221	6474	5630	5786	3927	2217	7886	6659
firstTileUTR_00748	1257	3477	2522	1883	1964	2083	775	996	1075	1345	862	1039			1079	1849	1742	1560	2607	853	2153	2343	2140	2084	1122	685	2276	1946
firstTileUTR_00749	1453	2513	2797	1542	2249	1739	600	850	1102	811	728	937			1761	1173	1377	787	1800	581	1575	1656	1865	1593	1011	652	2043	1793
firstTileUTR_00750	597	1511	1007	1003	1060	675	611	491	583	517	540	611			1128	843	705	268	1155	146	940	1160	885	885	685	423	1328	1131
firstTileUTR_00751	1739	3004	3091	2773	2011	1896	1036	1524	1116	1217	1032	1190			2969	1768	1655	2399	2106	856	2539	2813	1989	1809	1461	840	2679	2454
firstTileUTR_00752	2366	3985	3857	2615	4056	2775	1943	1256	1207	1340	1448	1645			2546	3070	2125	2284	4510	978	3559	3738	3009	2974	2319	1342	4249	3725
firstTileUTR_00753	1720	2000	1567	1534	1381	1107	787	658	786	710	724	801			2297	1264	1457	1613	1611	495	1793	2002	1590	1544	1257	655	2076	1943
firstTileUTR_00754	2600	4649	3969	3234	2715	3141	1708	1568	1209	1416	1319	1545			1062	837	848	430	1120	538	926	1059	894	903	517	300	1556	1254
firstTileUTR_00755	2598	4671	3644	3500	3722	3285	1725	1249	1694	2191	1340	1306			944	792	672	362	779	201	693	863	792	858	409	248	1181	930
firstTileUTR_00756	1281	1870	1974	1381	1837	1191	751	770	1021	725	677	674			706	746	351	563	520	443	642	658	506	596	296	198	791	680
firstTileUTR_00757	929	2356	1608	929	1786	1093	765	651	441	711	819	901			385	362	204	76	448	193	415	319	323	346	295	175	797	700
firstTileUTR_00758	6859	12973	10984	8145	8011	7818	4503	3774	3710	4364	4534	4846			8983	9034	8744	7124	10684	3075	11157	11777	10325	10477	7294	4577	14808	12432
firstTileUTR_00759	6903	10951	12267	8215	8204	7401	3695	4122	4064	4160	3579	4045			8572	8682	9161	6672	10097	3142	10352	10454	8985	8895	5630	3429	10762	9334
firstTileUTR_00760	152	203	105	43	224	261	46	16	71	140	71	68			502	224	279	0	252	0	201	273	310	237	90	82	249	204
firstTileUTR_00761	65	121	248	105	151	1	76	67	100	0	41	34			57	361	163	0	182	0	258	175	135	156	81	57	217	145
firstTileUTR_00762	1384	3037	2866	2007	1579	1586	959	818	947	719	778	1000			1040	807	1052	380	966	315	1091	1104	984	899	634	352	1204	1105
firstTileUTR_00763	2223	2742	2921	1592	2544	2317	1082	913	1220	1646	1092	1306			1577	1402	1493	853	1458	322	1421	1312	1138	1381	832	491	1818	1576
firstTileUTR_00764	1872	2154	1916	2968	2514	2193	1061	1240	1130	1233	1044	1243			1469	1259	604	1437	1478	337	1292	1568	1052	928	832	484	1780	1425
firstTileUTR_00765	1864	3110	3124	2568	3411	2080	912	1604	1116	1208	1062	1205			1374	1102	1249	1263	1897	462	1557	1528	1320	1335	858	523	1659	1486
firstTileUTR_00766	3286	5321	4887	4105	4189	3809	2019	2435	2101	1969	1731	1906			1769	1242	1377	2171	1566	565	2290	2225	1978	1741	1158	733	2274	1984
firstTileUTR_00767	3607	6664	6071	5131	5077	4964	3008	2619	2488	2563	2096	2181			2180	1313	2397	1976	2102	891	1898	2213	1921	2099	1219	800	2308	1944
firstTileUTR_00768	3572	6487	5252	4394	5573	3784	2128	2361	1712	2522	2101	2475			7141	7324	9042	5529	10173	2928	8714	8978	7678	7490	5501	3316	11589	9714
firstTileUTR_00769	4964	7982	7718	6147	7124	5565	2957	3019	2196	2409	2678	2994			9624	10470	7687	7215	10635	2869	10995	11558	8431	8883	6489	3851	13350	11425
firstTileUTR_00770	20977	34774	31806	23906	27846	24295	12185	14033	10609	11776	11137	11685			8088	7073	6527	8419	9130	4106	9910	10440	12192	12217	5006	4000	9830	8156
firstTileUTR_00771	15628	28300	24839	20236	21135	17902	9426	10692	8681	10067	9045	9927			7217	6075	4564	5643	6918	3451	7641	7822	9804	9697	3614	2610	6771	5646
firstTileUTR_00772	9457	14421	14583	11024	13341	10866	5975	6987	5685	6318	5441	5895			5711	3909	3081	4731	5588	2316	4955	5518	6276	6459	3192	2455	5756	4793
firstTileUTR_00773	5239	9045	8299	6912	7922	6943	3498	3875	3360	3311	2971	3140			2506	2520	1513	2572	3380	1361	3143	3078	3660	3970	1736	1355	3164	2656
firstTileUTR_00774	2777	5287	3885	3028	4439	4287	1998	1921	1866	1605	1790	1962			2843	2703	2864	2653	3707	755	3401	3530	3376	3216	1970	1317	4039	3271
firstTileUTR_00775	1935	3063	2591	1875	1378	1758	744	898	1258	895	867	938			1575	1550	858	2034	1300	376	1750	1838	1589	1703	1041	657	2185	1835
firstTileUTR_00776	29	53	0	0	0	65	0	0	36	1	12	17			0	3	0	0	113	0	23	12	35	47	20	11	34	45
firstTileUTR_00777	0	0	0	0	0	0	0	0	0	0	0	2			0	0	0	0	0	0	0	0	0	0	1	0	5	4
firstTileUTR_00778	28	165	42	0	0	0	16	0	32	30	4	0			0	89	48	0	71	153	40	71	14	9	6	2	13	20
firstTileUTR_00779	0	0	0	0	0	0	0	0	0	0	7	8			146	0	0	0	0	0	3	0	0	4	13	10	33	29
firstTileUTR_00780	0	0	0	283	0	0	0	31	0	29	14	7			0	0	0	0	2	0	9	4	10	17	7	5	14	7
firstTileUTR_00781	829	1005	770	1000	907	780	421	357	342	364	353	372			223	208	70	224	342	96	423	466	511	509	230	179	375	352
firstTileUTR_00782	864	921	1427	1284	1426	911	670	575	394	454	468	493			594	229	464	402	505	211	442	404	459	528	329	219	573	477
firstTileUTR_00783	0	0	0	0	0	0	0	0	0	0	11	9			0	0	0	0	0	0	0	0	0	0	2	3	5	13
firstTileUTR_00784	0	0	43	0	0	0	0	0	0	0	1	5			0	0	0	0	0	0	0	0	0	0	1	2	1	2
firstTileUTR_00785	4654	7252	5160	5472	5114	5979	2074	1734	2599	2593	2537	2857			12758	13587	9481	11175	16706	4213	15769	16255	12161	12208	10811	5865	20983	17368
firstTileUTR_00786	6979	12443	11375	10176	9122	8033	3779	4972	3710	4527	4640	5308			21306	24480	21234	20366	31220	9704	32708	33314	25362	25131	21220	11991	40938	32193
firstTileUTR_00787	1447	2647	3050	2431	1858	1769	800	839	811	956	1051	1167			1569	1456	2143	1194	1491	751	1900	1650	1326	1116	1338	726	2903	2195
firstTileUTR_00788	1716	2461	1656	1620	1460	2195	1020	968	947	1076	698	854			1768	1485	1219	1669	1813	382	1714	1803	1671	1494	983	563	2131	1717
firstTileUTR_00789	2680	4255	4902	3295	3772	2804	1578	1617	1629	1478	1677	1769			973	1041	900	884	1297	671	1450	1627	1806	1696	908	742	1619	1507
firstTileUTR_00790	1938	3585	3636	2712	2053	2120	1205	1502	926	947	1077	1131			1028	849	832	1523	1075	564	1159	1081	1415	1407	732	593	1362	1082
firstTileUTR_00791	1151	1166	1634	965	1723	1360	556	353	301	448	525	649			551	369	531	284	531	285	419	401	485	463	329	215	668	519
firstTileUTR_00792	593	1543	1802	902	1239	1638	474	771	463	569	402	433			616	478	380	2	483	116	509	510	526	585	259	167	457	398
firstTileUTR_00793	635	1319	1173	714	856	748	373	861	518	473	308	397			1380	864	1245	983	1773	652	1649	1904	1554	1677	759	486	1589	1121
firstTileUTR_00794	761	1233	1584	364	704	1074	380	781	294	461	308	396			1270	1527	1708	660	1152	306	1819	1853	1102	1222	762	447	1467	1288
firstTileUTR_00795	2574	4779	3885	3079	3055	3016	1280	2086	1374	1417	1328	1484			1988	1865	1291	1432	2350	378	2145	2166	2344	2582	1286	942	2289	1995
firstTileUTR_00796	1786	3733	3635	1594	2634	2289	1446	1480	1155	1154	1252	1349			1220	1164	856	2314	2067	991	1845	1994	1966	1929	1046	790	2054	1725
firstTileUTR_00797	2196	3285	2004	1844	2267	1521	878	960	1342	1438	999	1143			2410	2152	1266	1570	2303	692	2458	2703	2987	2717	1502	1004	2958	2537
firstTileUTR_00798	1957	3552	2845	2172	2541	2175	1322	858	1202	1207	1055	1185			2831	1887	1688	1449	2412	758	2610	2822	2470	2256	1432	963	2941	2474
firstTileUTR_00799	132	611	760	408	227	324	158	138	178	75	207	236			92	263	620	88	305	38	625	552	413	455	349	220	712	667
firstTileUTR_00800	290	182	106	153	586	165	20	70	147	71	157	142			571	372	217	89	253	123	403	407	352	319	261	146	590	422
firstTileUTR_00801	419	432	258	416	326	354	178	452	128	318	218	299			119	264	229	303	540	90	409	442	561	483	471	262	818	640
firstTileUTR_00802	449	662	477	82	328	391	197	2	128	203	112	147			58	592	282	126	594	82	359	440	464	491	198	114	360	291
firstTileUTR_00803	5234	9353	7717	6240	7439	5416	2479	2880	2817	3539	2477	2648			4328	3356	3500	3352	4522	1054	3796	4140	3779	3755	2202	1501	4005	3349
firstTileUTR_00804	6162	9584	7988	5725	7916	6245	3480	3787	3633	3429	2668	2931			3302	3913	2304	3685	4070	1217	4030	4059	4199	3892	2127	1436	4079	3397
firstTileUTR_00805	0	0	0	0	0	0	0	0	0	0	0	7			0	0	0	0	0	0	10	7	0	0	1	1	4	3
firstTileUTR_00807	1001	1569	1708	1083	1108	1452	514	545	336	310	566	540			1905	2265	1897	1544	1606	776	3076	2961	1648	1544	1719	836	2958	2484
firstTileUTR_00808	858	1590	1610	1171	857	716	353	405	217	432	339	370			996	1378	1668	1429	1494	599	1858	1793	1120	1146	1248	699	2221	1888
firstTileUTR_00809	4244	8100	5673	6914	5559	5479	2657	3101	2153	2283	2634	2713			2228	2376	1844	1427	2305	700	2511	2568	2456	2565	1493	984	3102	2543
firstTileUTR_00810	4048	8306	6104	4628	5567	4629	2083	2823	2271	2933	2165	2479			2127	1808	1296	1880	2025	1371	2117	1997	2381	2416	1331	907	2843	2520
firstTileUTR_00811	14	84	43	0	1	0	23	56	0	37	5	10			3	30	4	151	0	0	18	33	20	13	19	12	16	20
firstTileUTR_00815	879	1498	419	933	786	952	309	463	285	374	209	243			247	404	236	345	609	180	558	463	418	366	213	141	406	339
firstTileUTR_00816	1646	2556	1506	1386	1789	1380	802	783	550	825	606	674			1661	977	560	969	1089	334	1053	959	776	873	476	349	871	731
firstTileUTR_00817	10160	18089	18127	13225	12432	13535	5387	6747	6066	6608	5314	5721			11729	8879	10148	8794	12804	4143	12511	13051	10088	9998	6897	3777	13069	11498
firstTileUTR_00818	3104	4853	4972	3436	3940	3908	1694	1924	1594	1702	1797	2013			2048	2210	3053	2156	2959	688	3684	3410	3174	3022	2289	1395	4691	3990
firstTileUTR_00819	4855	6624	5591	5496	5188	5033	2501	2455	2021	2153	2048	2234			3711	4799	3593	3466	4986	1015	4830	5159	4102	3592	2699	1653	5574	4954
firstTileUTR_00820	3782	6718	5564	5853	5224	4836	2528	2481	1923	2538	2037	2265			3978	3202	3353	2594	5144	1403	5067	4973	3883	3851	2759	1623	5348	4523
firstTileUTR_00821	138	67	29	109	104	227	32	44	18	38	75	72			106	36	53	177	141	78	112	115	65	48	61	37	137	105
firstTileUTR_00822	0	58	108	108	40	0	0	73	13	0	54	83			176	145	81	77	19	0	36	60	50	53	50	36	125	78
firstTileUTR_00823	205	159	129	67	0	146	88	80	43	11	69	69			107	89	1	54	0	99	77	91	105	40	59	54	114	104
firstTileUTR_00824	130	239	192	469	436	185	83	83	87	45	74	113			0	111	63	303	215	97	112	141	133	153	67	54	149	124
firstTileUTR_00825	446	504	630	637	751	460	86	237	258	126	215	287			666	712	458	695	1012	170	597	602	465	455	496	266	885	769
firstTileUTR_00826	179	673	1005	287	487	380	128	218	113	316	241	244			246	386	505	648	622	280	703	645	418	499	427	265	840	700
firstTileUTR_00827	617	1195	799	1150	1043	870	536	679	435	457	398	452			709	1120	740	642	1345	130	1064	1349	680	633	839	481	1409	1248
firstTileUTR_00828	541	367	511	464	633	323	335	255	379	246	234	278			684	442	779	419	932	313	825	750	629	673	472	291	892	733
firstTileUTR_00829	557	2070	1044	1188	966	826	399	676	326	436	469	570			1374	1951	776	1046	1472	539	1388	1296	862	822	930	568	1669	1395
firstTileUTR_00830	4990	7226	6634	6687	6526	5104	2244	3070	2563	2606	2151	2495			3039	2171	1733	1634	2800	1309	2776	2666	2669	2481	1572	872	2913	2306
firstTileUTR_00831	5545	8869	8009	6540	6283	6890	3515	3857	3296	2570	3095	3149			3158	2277	3006	2032	2504	756	2683	2778	2924	2746	2053	1208	3566	2925
firstTileUTR_00832	526	1022	757	584	757	947	369	714	233	459	546	604			601	121	204	348	446	131	439	388	472	516	319	242	597	475
firstTileUTR_00833	613	1606	1546	1017	1428	887	394	707	431	515	612	634			512	415	136	424	524	154	609	487	716	724	352	276	645	542
firstTileUTR_00834	637	1012	1167	766	1047	564	303	350	410	258	367	338			99	210	141	217	351	403	314	287	410	340	177	130	346	311
firstTileUTR_00835	1151	2013	1939	1175	1469	1516	506	668	559	487	640	711			563	576	261	1464	680	241	458	490	594	678	326	255	619	480
firstTileUTR_00836	1112	2797	2099	1605	1691	1385	969	756	817	786	728	783			590	481	106	170	533	161	613	700	782	840	402	289	640	596
firstTileUTR_00837	1108	2097	1315	926	1263	677	450	471	399	640	404	432			467	556	494	1061	528	303	422	458	629	570	300	210	505	407
firstTileUTR_00838	2225	5094	3916	3134	3398	2495	1553	2117	1144	1277	1495	1475			1920	1561	1463	1929	1525	729	1507	1486	1794	1722	1068	678	1856	1628
firstTileUTR_00839	560	1137	1013	800	940	789	430	450	380	267	273	343			530	335	131	526	504	0	374	452	408	428	206	127	387	308
firstTileUTR_00840	2193	5351	4586	4135	2516	2956	1651	1494	1158	1735	1463	1548			1766	1607	1558	1610	1670	611	1622	1847	2099	1906	1083	677	1833	1811
firstTileUTR_00841	3006	6189	6477	5159	5015	3844	1949	2096	1825	2248	1935	2235			4327	3327	2721	2629	3770	1104	3081	3192	3340	3269	1888	1320	3777	3241
firstTileUTR_00842	3843	4782	6273	4772	4657	3741	1815	1981	2020	1433	1810	1968			3716	2678	2609	2573	4314	975	3067	3076	3267	3252	1981	1322	3712	3461
firstTileUTR_00843	2895	5923	5121	4085	4829	3398	1981	2147	1691	1952	1869	2057			2289	2936	2324	2035	3840	995	3344	3281	3020	3254	1944	1363	3822	3413
firstTileUTR_00844	3191	5894	4735	3726	4223	3865	1573	1955	1551	1519	1471	1421			3503	3174	2578	2800	3245	1166	3137	3317	3045	2986	1509	1092	2974	2721
firstTileUTR_00845	12	0	0	0	36	0	0	0	0	0	10	8			0	0	0	0	17	0	7	0	4	0	9	2	12	32
firstTileUTR_00846	2	0	0	0	0	40	0	0	0	17	1	2			0	0	0	0	0	0	6	33	35	15	4	3	4	1
firstTileUTR_00847	11164	18633	17781	15548	15261	14097	7585	7411	6080	6774	5804	6705			18654	17922	18186	13697	22131	6316	21809	22325	19529	19064	12363	7889	25719	22054
firstTileUTR_00848	12310	23294	22480	16370	16920	15752	7597	8521	7060	7983	7273	8621			27319	27274	28077	22052	32122	7787	32532	32968	28697	28763	18554	11948	39311	32912
firstTileUTR_00849	11804	20295	19425	12583	14943	16033	7247	7033	6460	6896	6137	7259			16596	17791	15888	12829	21367	5895	20466	20930	17754	17216	11344	7281	24192	20491
firstTileUTR_00850	12461	20625	19274	17379	16757	15570	7715	8784	6995	7770	6684	7646			18557	19512	20456	16298	27199	7202	24466	24486	21392	21638	13002	8179	27932	23464
firstTileUTR_00851	8563	14738	14025	10357	12289	10102	4593	4479	4144	4555	4175	4937			13967	13830	14602	10490	16062	5263	14637	15043	12580	13178	8264	5318	18010	15249
firstTileUTR_00852	9705	18204	15607	13692	14683	12730	6787	7107	5759	7572	5088	5941			16746	16371	13605	13952	21314	5057	20171	21049	17588	16896	9779	6269	20510	17368
firstTileUTR_00853	111	441	433	508	117	346	22	128	181	201	105	119			155	90	26	76	49	67	91	108	135	83	72	53	181	101
firstTileUTR_00854	245	424	223	171	170	90	83	55	75	11	145	137			119	0	107	162	71	36	91	165	114	97	87	59	158	156
firstTileUTR_00855	257	230	396	627	385	483	154	80	147	120	132	165			176	98	23	516	68	60	169	155	262	274	117	81	198	206
firstTileUTR_00856	214	256	349	271	263	313	70	90	38	140	150	186			0	224	25	235	60	170	76	109	160	148	137	82	247	228
firstTileUTR_00857	251	294	432	238	232	452	217	183	87	224	114	107			102	190	260	1	245	164	194	213	232	175	79	78	170	160
firstTileUTR_00858	447	603	624	366	413	263	203	276	189	293	120	130			350	335	198	154	582	50	542	628	528	404	189	98	334	258
firstTileUTR_00859	328	1553	858	285	840	756	227	327	290	236	179	183			178	750	840	690	501	276	680	661	512	482	314	165	628	489
firstTileUTR_00860	277	407	109	458	284	66	103	150	47	22	88	108			281	207	46	356	411	182	321	333	183	177	154	94	263	249
firstTileUTR_00861	403	203	330	375	438	239	253	206	195	160	84	81			465	257	20	175	389	63	388	439	299	349	154	90	316	270
firstTileUTR_00862	163	557	340	329	253	497	130	103	93	112	165	124			230	367	98	427	447	45	424	519	239	251	285	141	455	389
firstTileUTR_00863	1378	2704	1845	1853	1642	1078	765	869	602	717	615	580			1239	2212	1497	902	2119	468	1545	1668	1660	1463	718	399	1550	1447
firstTileUTR_00864	6691	9202	9971	5875	7683	7480	4029	3451	3993	4071	3119	3335			6868	6126	7005	5716	8527	2246	7564	7862	7597	7661	3920	2300	8179	6991
firstTileUTR_00867	0	0	0	0	0	0	0	0	0	0	0	1			0	0	0	0	0	0	0	0	0	0	0	0	0	1
firstTileUTR_00868	0	0	0	0	135	90	0	0	0	0	16	11			0	0	0	0	48	0	26	28	20	0	11	7	13	27
firstTileUTR_00870	124	142	23	106	19	182	0	0	57	30	21	26			138	84	85	0	73	121	39	23	50	36	25	18	77	61
firstTileUTR_00871	7178	12684	11114	10495	9319	8486	4048	4646	4306	4123	3768	4269			8065	6991	6415	6774	8153	2300	8869	9425	7740	7403	4653	3146	10758	8476
firstTileUTR_00872	4166	7890	5699	4473	5491	4480	2170	2569	2510	2351	2034	2526			4122	3365	3231	3116	4532	809	4881	4655	3774	3521	2514	1769	5577	4369
firstTileUTR_00879	93	72	189	235	128	98	44	36	28	64	61	43			1	78	114	0	43	0	65	41	69	73	30	16	49	64
firstTileUTR_00880	37	0	0	0	42	154	0	0	0	0	26	31			0	0	0	0	0	0	7	5	15	5	22	14	46	31
firstTileUTR_00881	90	34	32	0	49	69	66	23	0	0	29	49			57	0	0	163	43	69	59	56	27	42	25	19	60	43
firstTileUTR_00882	130	227	111	129	0	100	24	93	49	48	47	71			192	78	0	0	58	0	34	15	60	91	36	18	69	56
firstTileUTR_00883	0	57	0	0	0	0	29	0	0	8	9	4			0	0	0	49	0	0	0	0	9	5	8	2	18	7
firstTileUTR_00884	0	0	0	0	0	0	0	0	0	0	0	1			0	0	0	0	0	0	0	0	0	0	1	3	5	3
firstTileUTR_00886	0	0	0	0	0	0	0	0	0	0	3	0			0	0	0	0	0	0	0	0	0	0	2	0	10	4
firstTileUTR_00887	10989	20349	16977	14364	14281	10763	6987	7758	5729	7059	5928	6614			9442	8168	6799	6913	9435	2540	9151	8985	9057	8773	4984	3252	9758	8442
firstTileUTR_00888	8921	13489	11880	9570	11760	10430	6185	5954	4256	4531	4469	4915			7091	6073	7742	4587	7739	3483	7317	7669	7339	7154	3955	2521	7646	6538
firstTileUTR_00889	9783	16994	15334	12636	12076	11188	5033	6538	6217	6145	5087	5662			7178	6492	5270	5739	7448	2236	7098	7358	7992	7837	4130	2843	8492	7228
firstTileUTR_00890	8008	16243	13578	10334	11166	10939	5105	6312	5622	5980	5015	5877			6531	7614	4964	4846	7895	2566	7689	8081	8084	7516	4244	2956	8859	7778
firstTileUTR_00891	4709	8043	8320	6236	6791	5667	3139	3203	2792	2891	2756	3062			2412	2478	2465	2393	2748	948	2408	2399	2863	2682	1600	975	3364	2782
firstTileUTR_00892	3269	5662	5566	4221	4679	3339	2425	2347	1907	1867	1765	2067			2350	1795	1075	2266	1672	1060	1767	1809	1866	1803	1084	705	2135	1879
firstTileUTR_00893	3647	6374	5239	4079	6090	4617	2325	2507	2242	1459	2327	2674			2160	1528	1492	1512	1728	580	1926	1884	1972	1931	1264	812	2681	2241
firstTileUTR_00894	5795	9746	10653	7468	8803	6922	3810	3827	3429	4154	3274	3551			3196	2642	3104	2409	3282	947	3233	3393	3340	3229	1920	1288	4123	3442
firstTileUTR_00895	7747	13073	10590	9736	11046	10417	4621	4747	3529	4262	3896	4541			3870	2687	3461	3719	3830	1430	3700	3773	3640	3667	2116	1295	4333	3900
firstTileUTR_00896	11	0	91	90	56	50	0	37	0	38	30	34			149	39	0	0	78	0	141	92	102	105	62	43	189	129
firstTileUTR_00897	166	502	538	723	69	188	81	173	111	108	43	21			665	337	174	763	380	46	102	125	192	247	80	49	137	108
firstTileUTR_00898	330	660	458	680	687	353	162	276	152	134	244	248			125	301	607	334	1051	186	884	905	694	750	584	356	956	917
firstTileUTR_00899	523	1342	867	666	369	631	498	363	260	195	331	345			1036	1064	938	1041	1023	537	1401	1512	1211	1239	986	606	1771	1500
firstTileUTR_00900	6312	10079	8684	5293	7128	6013	2572	4092	2371	3396	2936	3220			6639	7163	4705	4848	7013	1842	6893	7507	6230	5646	4060	2387	7594	6298
firstTileUTR_00901	492	1298	1250	798	1364	1068	516	689	328	272	389	395			570	733	368	568	1062	463	1260	1115	929	797	527	309	954	803
firstTileUTR_00902	4074	7148	7239	6439	5912	5567	3035	3159	2469	3123	2788	3078			5189	4079	3581	3473	5579	1889	5707	6152	5226	5398	3835	2377	7249	6156
firstTileUTR_00903	4625	7110	6950	4518	5245	6057	2946	3431	2840	2741	2695	2759			4627	5071	4639	3693	6330	1351	7071	7189	5729	5872	3591	2188	7236	6049
firstTileUTR_00904	1105	1580	1032	1254	1120	657	439	657	371	403	415	452			1229	410	1193	736	1270	127	1233	1177	902	1089	674	361	1145	933
firstTileUTR_00905	6882	12691	11792	9900	9909	8615	5054	4747	5025	4695	3830	4150			4998	6232	6579	5307	7731	2392	8183	9020	7021	6834	4272	2486	8093	7053
firstTileUTR_00906	6981	12307	12591	8982	10761	9258	4575	4523	3999	4266	4148	4617			6919	6020	5460	3701	8126	2541	7956	8135	6805	6321	4714	2712	8557	7265
firstTileUTR_00907	1368	2211	2253	1990	1633	1707	625	647	626	818	487	523			1889	671	904	606	1080	471	1169	1107	932	1093	602	343	1178	1074
firstTileUTR_00908	1014	1052	1556	1244	1219	1030	329	505	508	313	357	421			929	878	938	580	860	536	831	940	695	691	471	267	1021	891
firstTileUTR_00909	1942	2743	2927	2441	2140	1987	1417	1302	1145	1429	1179	1208			4302	4738	4060	2679	5115	1234	5388	5201	4449	4355	2745	1636	5546	4681
firstTileUTR_00910	1205	3256	2918	2094	2108	2375	969	1077	853	830	999	1173			2382	3326	3532	2073	3717	909	3968	4377	3220	3192	2273	1431	4526	3936
firstTileUTR_00911	1760	3457	2339	1587	2381	2067	926	879	1044	933	964	1201			2924	3129	2642	2641	4251	754	3854	4266	3340	3309	2487	1548	4469	3849
firstTileUTR_00912	1868	3529	2990	1850	2217	2299	873	1451	697	1107	987	1094			2760	4362	3622	1767	3386	542	4647	5033	3846	3566	2390	1380	4388	3460
firstTileUTR_00913	50	0	134	0	23	2	0	16	24	62	7	20			0	0	54	0	34	98	52	39	29	34	9	13	20	30
firstTileUTR_00914	0	52	73	0	40	0	0	0	26	0	28	23			0	0	0	4	0	0	16	12	1	20	19	10	57	30
firstTileUTR_00915	0	58	0	0	1	0	0	0	85	0	3	2			0	0	0	0	0	0	0	0	12	3	3	3	2	4
firstTileUTR_00916	50	81	0	0	30	0	0	0	0	0	7	9			2	34	30	0	2	41	0	19	50	13	8	4	33	18
firstTileUTR_00917	1320	2201	2071	1953	1566	1662	628	1005	810	601	731	952			830	1101	956	625	968	407	1189	1314	1106	1225	718	440	1455	1255
firstTileUTR_00918	772	2659	2327	1542	1934	1919	839	918	828	744	774	830			1306	1533	2049	1230	1415	89	1125	1098	1045	1008	774	441	1600	1382
firstTileUTR_00919	1363	2394	2075	2190	1843	2072	933	897	697	826	867	993			1678	1384	1359	1543	2042	361	1752	1904	1319	1224	1006	589	1979	1622
firstTileUTR_00920	1546	2617	2405	1692	2739	1904	922	1181	720	1082	779	830			1453	1398	925	695	1763	830	1645	1544	1238	1431	693	420	1534	1211
firstTileUTR_00921	1385	2160	2108	1329	1287	1424	727	672	776	803	660	730			697	1119	1005	572	955	350	1338	1254	995	1041	639	389	1335	1175
firstTileUTR_00922	953	1352	1612	807	1340	1383	461	343	405	438	538	628			1691	1250	1096	1384	1545	604	1684	1638	1608	1592	1278	808	2406	1991
firstTileUTR_00923	1356	1702	1579	1192	1883	1226	572	563	852	648	687	766			1663	2327	1528	1160	2461	278	2634	2519	1967	1928	1640	872	2904	2347
firstTileUTR_00924	72	0	0	0	70	122	107	62	0	0	17	19			0	32	0	0	0	0	75	57	34	8	12	3	18	19
firstTileUTR_00925	0	0	0	0	0	0	0	0	0	0	3	3			0	0	0	0	0	0	0	0	0	0	3	2	3	0
firstTileUTR_00926	6099	6888	7240	6473	6786	7346	3515	3642	3377	3240	2857	3217			3227	1776	1707	2505	3373	1073	3286	3360	3684	3233	1415	901	2682	2430
firstTileUTR_00927	8853	10411	11558	7796	10235	5891	4131	5188	2891	3830	3603	3874			3490	2144	2495	2604	3538	1250	3668	4062	3601	3766	1670	1080	3388	2906
firstTileUTR_00928	4422	7455	7863	6224	6034	6563	3407	2980	2588	3257	2705	3114			1990	2128	2510	2141	2304	615	2673	2500	3009	2970	1250	809	2501	2192
firstTileUTR_00929	6350	10016	10159	7319	7762	7461	3903	3669	3489	2966	3448	3841			3193	3364	2733	3240	3386	990	3407	3522	3976	3748	1606	1091	3347	2862
firstTileUTR_00930	7624	11809	11494	9831	10434	8134	4915	5976	3911	3941	3746	3983			2712	3442	2272	2910	3648	1333	4096	4268	3939	3945	1723	1128	3390	2957
firstTileUTR_00931	5095	11350	9298	5731	7915	6943	3790	3577	3130	3740	3205	3456			2746	3047	1903	3231	2878	1369	3315	3370	3642	3840	1747	1091	3664	2972
firstTileUTR_00932	7950	10629	11214	7532	10720	8737	4797	4694	4430	4400	3785	4044			2669	3297	2248	3284	3964	1899	3593	3709	4238	4314	1720	1185	3673	3011
firstTileUTR_00933	6006	8962	7742	6034	6202	6082	3587	4111	3233	3515	2909	3154			2696	2199	2332	2500	3210	976	2887	3019	3084	3291	1204	742	2380	2100
firstTileUTR_00934	5922	9639	9024	7121	6955	6178	3276	3665	3101	3185	3319	3659			2442	2217	2027	2909	2577	537	2779	2912	3290	3340	1961	1248	3487	3031
firstTileUTR_00935	993	1344	1232	869	962	1373	553	546	496	760	560	667			1216	1159	1052	593	1515	635	1363	1229	1105	1038	967	589	1994	1835
firstTileUTR_00936	1261	2009	2454	1645	1940	1937	870	865	885	458	727	667			1182	1248	1192	986	2130	502	2047	1926	1752	1893	1221	652	2545	2030
firstTileUTR_00937	1019	1534	1720	1299	1153	1524	891	709	494	629	709	718			2094	1649	2002	1288	1964	485	3300	3350	1830	1960	1819	896	3459	2942
firstTileUTR_00938	1751	3148	1515	1562	2437	1949	1335	899	749	1049	859	823			2943	3949	2637	2332	3127	1127	3595	3562	2598	2661	2075	1116	4082	3469
firstTileUTR_00939	949	2427	1257	1420	1145	1204	780	802	689	556	581	563			2092	1980	1833	1447	2421	399	3096	3035	2098	2003	1403	725	2774	2230
firstTileUTR_00940	1666	2494	2022	1464	1762	2112	620	795	1007	1058	800	894			2069	2541	2176	2133	3461	755	3211	3114	3001	2922	2037	1003	3861	3555
firstTileUTR_00941	24	0	22	0	5	0	20	0	0	15	12	14			174	0	0	0	22	49	51	30	17	31	30	12	59	40
firstTileUTR_00942	0	93	35	68	0	18	21	7	27	29	2	5			70	71	117	0	2	0	89	114	71	46	13	6	21	23
firstTileUTR_00943	43	4	28	74	44	0	0	18	0	0	8	3			310	226	147	0	21	0	100	68	86	60	9	1	12	6
firstTileUTR_00944	0	0	0	0	0	0	0	0	0	0	1	4			0	0	0	0	0	0	4	13	0	0	8	6	7	8
firstTileUTR_00945	549	489	496	286	214	512	224	144	165	304	84	99			115	367	249	2	152	40	372	377	309	373	101	68	211	160
firstTileUTR_00946	63	504	137	430	379	366	124	56	151	167	135	143			362	173	204	203	245	70	418	388	325	261	206	95	255	271
firstTileUTR_00947	0	11	60	0	4	0	26	0	21	64	28	48			101	64	0	0	148	58	212	160	154	125	98	59	158	166
firstTileUTR_00948	119	31	101	117	49	119	46	101	37	18	38	44			404	17	206	0	322	0	389	391	195	231	114	58	222	185
firstTileUTR_00949	28	106	141	203	92	67	0	19	26	27	24	26			27	138	80	223	336	0	264	273	132	111	86	50	171	113
firstTileUTR_00950	101	411	269	107	63	7	19	36	33	84	60	78			208	219	91	0	228	38	220	261	335	291	193	100	343	307
firstTileUTR_00951	18	0	0	0	0	0	0	0	0	0	5	2			0	0	0	0	0	0	0	0	0	0	3	5	15	19
firstTileUTR_00953	3828	6321	5786	4602	5114	3623	2371	2359	1732	2347	2182	2302			2337	1638	1921	2359	2869	1424	2309	2602	3015	3073	1376	1044	2567	2110
firstTileUTR_00954	3671	7693	6706	5843	4979	4187	3005	2143	1803	2767	2270	2551			3100	2029	2094	2290	2647	812	2507	2655	2810	3007	1501	1163	2833	2407
firstTileUTR_00955	0	0	0	0	0	0	17	0	0	0	2	3			0	0	0	134	0	0	8	45	11	16	2	3	10	7
firstTileUTR_00956	0	0	0	0	0	0	0	0	0	0	0	0			0	0	0	0	0	0	0	0	0	0	6	1	3	14
firstTileUTR_00957	6563	9945	12135	8568	8898	6691	3276	4607	3687	3492	3269	3640			5242	4919	5089	4950	5629	2018	5969	6203	6038	5773	3469	2257	6095	4984
firstTileUTR_00958	5462	7938	7780	5387	7515	4947	3664	3542	2813	2680	2475	2680			3909	3014	2398	2275	5109	1073	4693	5433	4723	4641	2378	1515	4148	3501
firstTileUTR_00959	81	172	169	81	56	363	1	69	25	59	61	89			103	50	55	0	81	223	162	126	90	79	89	47	115	95
firstTileUTR_00960	82	140	400	235	227	74	78	64	118	130	104	120			206	116	151	443	228	0	231	154	186	156	128	88	225	190
firstTileUTR_00961	14892	23217	17772	16254	18939	14431	6747	9006	6655	7492	7133	7784			14609	13913	12382	10956	16279	3827	16729	17482	13711	13750	9295	5494	17653	15325
firstTileUTR_00962	13534	23082	22643	14864	15369	15131	7988	7034	6547	7709	7069	7807			14635	16088	14124	11075	16478	4267	16528	16793	14154	13315	9862	5737	18777	16336
firstTileUTR_00963	10656	16563	15015	12935	13130	12394	6227	6770	6752	5699	5359	6024			12112	11488	9835	9067	12992	3984	13039	13724	11373	11360	7379	4349	14171	12628
firstTileUTR_00964	9888	19348	15890	10831	13239	12622	6179	6882	5539	5345	5137	5787			11222	11094	12810	10190	13568	3925	12868	13534	10548	10116	7469	4189	13547	11744
firstTileUTR_00965	9483	14876	12524	10548	11352	11003	5418	5665	4938	6094	5182	5738			9425	11709	9910	8627	12456	3266	11535	11901	10104	9615	7480	4295	13531	12039
firstTileUTR_00966	669	1530	793	1053	1248	1536	690	740	525	606	651	614			369	259	170	228	552	245	491	457	756	683	289	246	502	472
firstTileUTR_00967	682	1118	1285	1089	1111	1310	645	627	554	552	531	595			426	123	3	43	243	203	443	371	439	504	280	211	464	429
firstTileUTR_00968	5882	10061	10391	8332	7825	6430	3307	3878	3254	3218	3269	3486			6854	7132	6010	6514	7694	2592	8797	9149	7586	7600	4479	2860	9900	8012
firstTileUTR_00969	5738	10165	9764	6300	7486	7269	3435	4412	3031	3722	3324	3734			10312	11144	10390	10497	13493	3274	14024	14359	14767	14891	5538	4108	14818	12071
firstTileUTR_00970	5872	9956	8642	7323	6434	5565	2787	3365	2840	3079	2937	3375			7581	6333	6435	7159	7537	2084	8046	8297	7816	7699	4382	2997	9578	8028
firstTileUTR_00971	6384	11632	10750	8040	8582	9210	4406	5153	3973	4752	3633	4129			13662	12888	13701	8336	16706	5492	17481	18081	17568	17554	6414	4786	17590	14795
firstTileUTR_00972	296	671	852	392	454	223	124	310	147	233	204	274			456	697	856	143	509	99	549	546	638	583	393	213	709	693
firstTileUTR_00973	363	596	706	226	538	201	305	318	164	303	185	192			231	685	268	274	737	259	592	611	466	482	429	194	813	697
firstTileUTR_00974	343	563	618	594	477	173	199	442	94	147	197	235			304	434	359	0	394	76	495	614	255	291	333	176	581	573
firstTileUTR_00975	347	714	518	594	384	423	243	371	151	78	172	174			260	376	436	333	609	282	436	524	469	488	346	180	573	493
firstTileUTR_00976	1443	1984	2649	1523	2183	1727	774	1244	949	803	768	926			1643	1295	1345	896	1423	586	1851	2132	1396	1739	1102	668	2157	1975
firstTileUTR_00977	1068	1912	1593	1264	1639	1621	772	824	540	900	545	812			945	1113	1121	636	1893	340	1864	1887	1818	1433	818	525	1803	1470
firstTileUTR_00978	1753	1876	2446	2377	2429	2135	776	1203	966	1157	779	898			2361	1157	1920	1809	2148	367	2101	2156	1862	2028	1011	578	1927	1733
firstTileUTR_00979	2822	3168	3992	3121	2712	1865	1820	1503	857	1468	1094	1123			2800	2863	1957	1650	2507	930	2285	2481	1988	2229	1327	735	2667	2167
firstTileUTR_00980	8075	12874	14148	10107	11388	9836	4946	6192	4945	5205	4422	4537			5153	5424	3925	4104	5355	1608	5519	5346	5740	5339	3037	2164	5896	5035
firstTileUTR_00981	7420	14195	12680	10098	9557	7763	4749	5822	4717	4923	4671	5072			5412	4211	3050	2797	5145	1871	4925	4993	5149	5212	3399	2389	6296	5279
firstTileUTR_00982	14413	24899	22799	19703	18937	18876	8155	9020	7360	9502	7366	8738			34092	32890	34443	28326	42077	10620	42546	43635	37454	37354	20505	12683	41626	35486
firstTileUTR_00983	5897	8940	9091	7541	7051	5511	2763	3754	3555	3633	2801	3513			14031	11226	10212	9035	14545	4075	14535	15335	13761	13586	7456	4426	15195	12822
firstTileUTR_00984	3917	4500	6625	4405	5198	5284	2071	2081	2105	2754	1807	2090			2598	1839	2762	2378	2587	1142	2440	2357	2115	2003	1466	865	2713	2381
firstTileUTR_00985	3660	8008	8118	6088	6813	6368	2886	3524	2648	3764	2763	3275			2245	3095	2787	3016	3096	1187	3434	3666	3146	3023	2271	1416	4379	3763
firstTileUTR_00986	4794	8259	7657	6082	5894	6735	3207	4164	2698	2800	2429	2574			7520	8297	6398	6087	10325	3080	10792	11101	8314	8220	5100	2804	9416	8260
firstTileUTR_00987	4608	8646	8265	5046	7356	6711	2665	3476	2581	2537	2897	3456			6890	8376	8477	6167	10387	2178	10428	11125	8088	8768	6345	3669	11783	10535
firstTileUTR_00988	5597	8209	8575	5850	6476	5693	2694	3303	2730	2937	2442	2816			10307	9601	10239	6555	11612	3683	11063	11881	8957	8901	5942	3473	11519	9853
firstTileUTR_00989	4308	5847	6577	4812	4989	4956	2360	2287	1887	2435	2074	2402			8506	6882	7145	5518	9067	2296	9251	9937	7860	7676	5002	2895	9561	8615
firstTileUTR_00990	0	0	0	0	0	0	0	0	0	0	1	0			0	0	0	0	0	0	0	0	0	0	1	0	3	0
firstTileUTR_00991	0	0	0	0	0	0	0	0	0	0	5	6			0	0	0	0	0	0	0	0	0	0	6	2	2	7
firstTileUTR_00992	332	241	368	581	89	325	81	113	141	201	159	170			382	589	353	498	719	105	484	508	639	607	458	284	809	758
firstTileUTR_00993	224	409	457	409	473	572	139	68	86	121	118	114			926	877	669	982	1013	350	830	859	791	697	267	166	526	466
firstTileUTR_00994	105	237	117	224	28	120	26	76	24	23	54	67			212	174	21	176	33	85	153	179	234	243	142	74	326	227
firstTileUTR_00995	43	0	0	1	0	83	0	33	16	10	32	43			119	0	0	1	25	0	89	118	102	69	101	64	229	192
firstTileUTR_00996	0	0	0	0	0	0	22	0	1	15	5	5			0	0	0	0	0	0	9	12	0	0	10	6	9	13
firstTileUTR_00997	0	0	0	0	0	0	0	0	0	0	0	0			0	0	0	0	16	0	0	0	43	13	0	0	0	0
firstTileUTR_00998	155	179	226	149	104	115	56	63	36	35	115	156			158	0	105	0	50	0	103	145	58	43	142	84	240	243
firstTileUTR_00999	24	95	20	214	15	0	35	68	68	49	24	32			0	31	0	0	33	0	48	35	51	74	20	21	55	63
firstTileUTR_01000	19	74	89	133	184	49	28	19	43	0	9	6			58	37	44	0	196	70	31	57	74	83	17	8	12	18
firstTileUTR_01001	0	0	0	0	0	3	0	0	0	48	7	17			0	34	0	0	14	0	0	0	57	23	27	15	57	35
firstTileUTR_01002	29	87	71	0	0	0	0	125	10	1	36	37			0	1	25	151	14	0	75	65	56	23	21	23	34	38
firstTileUTR_01003	77	144	0	91	0	0	27	35	0	10	20	25			1	0	0	0	22	0	15	40	62	48	7	9	18	20
firstTileUTR_01004	3128	4890	3840	3924	3648	3295	1708	1798	1775	1556	1529	1688			2402	1453	1297	1102	1537	599	1814	1841	1730	1841	1025	706	1916	1544
firstTileUTR_01005	2363	3929	3356	2787	4040	3356	1458	1180	1302	1078	1385	1449			1839	1563	620	2263	1408	977	1427	1453	1572	1710	837	577	1610	1357
firstTileUTR_01006	2626	4398	4704	3005	3606	3349	1927	1791	1485	1603	1445	1601			1863	1094	1285	1593	1786	1040	1585	1857	1824	1752	913	659	2020	1581
firstTileUTR_01007	3736	6482	4558	4340	4800	4486	2351	2839	2284	1904	2210	2419			2581	2595	967	2264	2449	1162	1985	2228	2246	2403	1498	904	3048	2315
firstTileUTR_01008	1353	2285	1506	1830	1352	1332	858	715	1009	1100	755	769			788	924	735	1263	1099	191	1061	1083	1363	1223	716	437	1265	1034
firstTileUTR_01009	1025	1844	1678	1638	1502	1797	620	836	628	576	771	776			945	967	958	599	942	386	909	937	1035	1066	663	421	1217	873
firstTileUTR_01010	893	1886	1097	1424	919	1255	520	566	624	602	568	634			747	480	604	488	622	210	873	834	822	781	506	347	889	726
firstTileUTR_01011	922	1504	1360	1721	1168	1086	661	982	632	708	609	573			289	484	758	314	633	469	775	787	730	840	455	303	800	689
firstTileUTR_01012	95	127	0	237	148	70	69	33	41	44	43	59			282	32	230	83	36	32	21	34	58	38	35	36	67	66
firstTileUTR_01013	26	175	110	112	44	46	0	68	0	23	27	55			100	79	0	0	9	3	13	36	32	37	17	13	66	46
firstTileUTR_01014	120	216	59	153	136	29	95	28	16	50	77	86			0	18	0	22	46	0	64	27	52	43	50	35	89	75
firstTileUTR_01015	171	58	142	137	225	399	69	49	35	103	38	71			95	0	244	68	109	86	92	97	80	81	34	29	76	65
firstTileUTR_01016	92	540	269	383	113	25	138	220	77	110	65	87			65	99	183	136	212	49	162	186	206	121	82	59	225	192
firstTileUTR_01017	356	713	326	274	306	169	178	131	130	98	154	121			584	270	291	23	340	42	255	244	513	419	192	95	290	291
firstTileUTR_01018	189	418	649	446	642	150	246	92	169	157	147	184			902	664	951	155	792	243	917	909	637	579	396	218	869	603
firstTileUTR_01019	325	658	493	518	488	165	161	121	170	171	247	306			1001	569	464	420	636	167	766	830	632	667	513	269	1061	899
firstTileUTR_01022	61	1	0	0	0	0	39	8	0	0	0	0			0	0	0	0	0	0	11	0	0	9	1	0	5	3
firstTileUTR_01024	285	719	849	313	416	403	226	291	225	550	185	221			357	192	535	461	582	108	438	418	642	570	274	187	467	486
firstTileUTR_01025	763	1183	1032	593	631	482	269	330	221	265	259	232			386	507	404	773	790	189	1043	975	700	624	256	177	546	380
firstTileUTR_01026	128	89	68	135	168	149	21	99	156	17	103	123			120	267	155	0	67	33	307	309	220	234	238	139	534	411
firstTileUTR_01027	162	338	34	229	345	143	185	78	42	58	136	115			374	262	95	376	223	0	497	440	217	267	260	123	595	511
firstTileUTR_01028	185	262	177	279	383	154	110	78	90	141	85	118			210	313	636	727	409	122	365	331	273	284	207	113	377	348
firstTileUTR_01029	38	257	124	144	349	114	187	207	112	100	114	132			192	100	152	50	174	0	252	353	197	258	265	148	605	458
firstTileUTR_01030	177	290	146	150	307	107	9	50	172	88	118	112			225	215	148	10	399	129	217	254	292	240	265	133	489	424
firstTileUTR_01031	161	315	255	208	46	97	100	172	93	142	117	123			200	188	583	340	297	141	403	379	355	445	263	141	621	452
firstTileUTR_01033	0	0	0	0	0	0	0	0	0	0	4	0			0	0	0	0	0	0	0	0	0	0	2	0	2	3
firstTileUTR_01034	36	0	97	0	123	0	83	0	0	53	14	15			0	0	65	0	6	32	23	34	19	27	3	5	20	4
firstTileUTR_01035	0	0	0	0	0	0	0	0	48	21	0	0			0	0	0	0	0	0	0	0	13	2	0	0	0	0
firstTileUTR_01036	4283	6360	6254	4413	3737	4186	2827	3209	2236	1798	2060	2148			2901	2013	1827	2530	2503	911	2863	3059	3219	2925	1570	1197	2962	2588
firstTileUTR_01037	4045	7075	5761	4911	4717	4747	2252	2899	2286	2266	1751	1917			3443	1819	1778	2182	2732	1220	2898	2955	3285	3054	1379	1047	2640	2227
firstTileUTR_01038	4622	7883	7677	6362	7416	6106	3354	3379	2484	3488	2629	2923			3705	2418	1675	2272	3641	1584	3257	3569	4409	4580	2191	1589	4125	3363
firstTileUTR_01039	4460	5995	5836	4004	4299	4644	2265	2498	2369	2639	2040	2178			2342	1864	1854	2619	2565	881	2901	3080	3245	3411	1684	1188	2962	2485
firstTileUTR_01040	3449	5125	5149	5055	4504	3838	2527	2783	1956	2452	2120	2230			2714	2053	1563	2115	2753	686	2840	2900	3507	3371	1575	1231	3016	2546
firstTileUTR_01041	324	520	309	899	712	480	312	114	153	124	221	246			298	426	515	804	566	114	543	537	395	417	281	191	607	481
firstTileUTR_01042	206	553	1042	242	411	316	319	281	229	209	196	229			373	369	342	172	526	105	501	611	306	302	353	213	639	470
firstTileUTR_01043	5143	6936	5750	4983	4715	5358	2456	2777	2230	2957	2134	2377			7035	6468	6099	5866	7586	1954	8708	8905	7384	7257	4117	2630	8220	6999
firstTileUTR_01044	16569	28607	27132	21972	23272	20073	9450	12291	9366	11304	8806	10092			21069	22593	19792	19668	29449	7800	30332	31352	27440	27238	13984	9529	26957	22220
firstTileUTR_01045	54	114	0	0	0	0	0	30	0	4	12	18			1	76	0	0	0	0	61	14	2	2	18	10	38	39
firstTileUTR_01046	0	88	51	74	0	0	41	26	0	0	5	14			0	32	0	0	54	0	79	109	32	13	12	4	19	16
firstTileUTR_01049	13940	23038	23370	18551	18726	16320	8290	9287	8913	8353	7668	8956			20622	22847	23307	18745	28698	8102	32688	34464	27643	27146	17056	10030	41093	31997
firstTileUTR_01050	16452	27357	25388	17243	20887	18379	8677	10515	9950	10301	8746	10086			27933	25800	27439	21511	35902	9237	39900	40356	32397	33143	20287	12141	49419	39149
firstTileUTR_01051	15004	25922	24383	19057	18464	18632	9180	10128	8276	9448	7690	8618			22943	20594	20660	17698	22452	6643	28073	29047	23732	23742	14703	8476	35085	27627
firstTileUTR_01052	9759	18846	15495	11412	12639	10827	5719	5702	4464	5177	5307	6069			15217	14542	14299	10081	17749	5137	19061	19365	15757	15022	10040	6082	22467	18601
firstTileUTR_01053	11896	18538	17193	12830	14786	14088	6851	7746	6609	6705	6489	7263			16740	16089	16466	11581	20618	5950	20250	21496	18154	17728	11427	6959	24489	20371
firstTileUTR_01054	1	0	88	51	1	17	28	0	28	0	21	18			0	97	75	119	153	114	162	117	103	96	23	27	70	45
firstTileUTR_01055	146	26	145	178	159	45	38	13	17	60	30	32			838	271	172	344	120	20	194	199	303	320	41	38	140	187
firstTileUTR_01056	317	197	535	222	18	139	143	98	170	222	194	205			242	317	321	45	156	238	186	165	537	411	374	209	724	521
firstTileUTR_01057	244	538	287	262	361	150	88	78	263	101	205	194			526	377	454	332	739	146	569	420	525	433	330	168	642	571
firstTileUTR_01058	17388	30159	27506	21182	22892	18802	9940	11515	8895	10067	8568	9563			10737	7751	7620	6488	10028	3208	10738	10663	10575	10513	4857	3451	10197	8439
firstTileUTR_01059	11664	22437	20925	14860	15825	15259	7507	8690	7423	7789	6185	7233			7283	6493	5517	5757	7457	2701	7141	6941	7592	7849	3547	2579	7590	6407
firstTileUTR_01060	1713	2608	2210	2163	2285	1932	813	1365	961	1185	868	943			1533	1060	937	1675	1676	350	1459	1519	1404	1294	964	590	1776	1547
firstTileUTR_01061	1149	1651	2221	1421	1884	2258	940	944	787	1261	809	918			1906	787	1469	1064	1416	699	1244	1492	1253	1203	844	522	1574	1384
firstTileUTR_01062	2598	3016	2521	1781	1449	2367	1122	1110	1129	1269	951	1054			1865	2289	1376	1135	1479	554	1770	1937	1759	2062	1015	615	1883	1616
firstTileUTR_01063	1595	3194	2742	2009	2246	2241	887	1085	1009	1069	812	923			1282	997	693	651	1385	294	1567	1702	1517	1529	874	524	1657	1414
firstTileUTR_01064	2807	4646	4371	3627	4173	3133	1591	1892	1416	1557	1231	1438			7072	6689	7173	5592	8094	2232	6979	7233	7613	8096	3483	2383	8132	6698
firstTileUTR_01065	4647	5839	6979	3972	6149	5178	3015	3239	2247	2124	2183	2169			12331	11159	10848	7389	15236	4129	14071	14317	12509	12229	6294	4035	14828	12498
firstTileUTR_01066	2199	4802	3404	2293	2529	2417	1409	1701	1019	1224	1046	1128			1451	1230	1317	1025	1170	352	1427	1313	947	989	692	409	1475	1254
firstTileUTR_01067	3513	5292	3465	2633	3898	3517	1916	2077	1525	1805	1498	1539			1418	1030	1065	778	1130	468	1543	1695	1287	1246	942	500	1865	1570
firstTileUTR_01068	2273	3789	2640	2281	3969	2280	1178	1578	784	1294	1031	1154			1034	1025	747	1388	1717	247	1410	1573	1071	1146	800	439	1563	1451
firstTileUTR_01069	2977	5051	4798	3410	3416	3207	1871	1783	1541	1214	1211	1336			1702	1543	1254	898	1527	63	1574	1612	1125	1261	810	448	1770	1499
firstTileUTR_01070	3311	5475	5866	4129	4324	3858	1857	2093	2147	2222	2056	2291			1893	2356	1803	1210	2117	1414	2104	2016	2269	2380	1394	882	2395	2076
firstTileUTR_01071	3478	7242	6682	4266	4989	3772	2325	2667	2528	2652	2158	2328			2501	1792	1528	2151	2517	988	2298	2339	2749	2777	1414	856	2385	2123
firstTileUTR_01072	12570	21831	19649	13855	15644	15020	6370	7810	6412	6663	6414	7134			7160	7578	7462	4879	8336	3501	8266	8405	8903	8428	4761	3168	8714	7730
firstTileUTR_01073	12555	22410	16715	14761	17113	13364	7703	8778	7668	7393	6363	7100			7972	8425	7737	5959	7933	2877	8040	8749	9203	8997	4530	2940	8178	7174
firstTileUTR_01074	0	0	0	0	0	0	0	1	0	0	9	1			167	5	0	0	0	0	24	26	15	19	16	6	23	29
firstTileUTR_01075	20	192	47	0	15	0	37	9	0	6	9	11			0	51	25	63	18	0	54	37	54	44	15	14	30	55
firstTileUTR_01076	919	2162	1453	1413	1595	1657	734	677	585	759	623	639			1005	2093	1401	1247	1838	325	1599	1614	1619	1558	1053	672	1852	1648
firstTileUTR_01077	1234	2544	3312	2045	2905	2198	1134	837	1094	1001	1027	1131			1829	2564	1796	2237	2686	737	2324	2272	1993	1966	1777	1054	3132	2736
firstTileUTR_01078	1124	2318	2956	1753	2057	1434	782	731	876	916	816	860			1368	1844	1997	1671	2367	667	2485	2421	1858	2198	1143	671	2180	1865
firstTileUTR_01079	1483	4269	2615	2799	2283	2589	1123	1069	1305	1295	1039	1147			2583	3196	2443	2067	2470	732	2783	2892	2731	2694	1635	1026	3093	2719
firstTileUTR_01080	2383	4570	4593	3075	2630	2925	1801	1877	1467	1589	1401	1489			3791	3191	4140	2907	4039	793	4971	4876	3529	3256	2446	1405	4710	3957
firstTileUTR_01081	1051	1883	2315	1635	2297	2470	917	818	945	659	930	1101			1856	1958	2153	2005	2584	901	2403	2461	1990	1906	1563	991	3030	2455
firstTileUTR_01082	6827	13764	12108	10447	11795	10046	5373	5567	4616	5420	4195	5165			12350	11946	10866	9915	15606	3710	15075	16003	13042	13177	8308	4999	16546	14125
firstTileUTR_01083	11854	18952	16177	13613	12243	13750	6907	6460	5684	7180	5705	6485			19365	16192	15569	9698	17859	6039	18502	19250	16620	16473	11020	6353	20879	17818
firstTileUTR_01084	6338	14152	12185	8908	9139	9368	4142	4287	3675	3321	3992	4525			11965	12124	11328	8389	14840	4091	13862	14751	11334	11780	8314	4768	15644	13198
firstTileUTR_01085	12082	21065	17818	12108	16099	12271	7287	7506	7165	8329	6001	7025			17958	18292	17938	13823	21547	5522	22701	23124	17864	18456	12727	7328	24430	21236
firstTileUTR_01086	2492	4768	3288	2981	3631	2688	1618	1339	1135	1704	1703	2069			4112	4565	3667	4525	6096	1264	6395	6214	4750	4809	4129	2323	7992	7075
firstTileUTR_01087	3112	4608	5326	4034	4126	4076	1983	2091	1826	2356	1985	2353			4728	5066	5062	3605	7536	2045	6817	7072	5818	5728	4881	2740	9301	7989
firstTileUTR_01088	2417	3309	2775	2170	2433	2905	1237	1517	1377	1297	1422	1638			4071	4526	3056	3967	4313	1216	5342	5621	4686	4481	3325	1917	6552	5385
firstTileUTR_01089	4122	7080	6413	4776	5541	4904	2793	2499	1780	2566	2116	2416			8316	6467	5906	3411	8679	3185	8168	8523	8092	7782	5144	2755	9653	8220
firstTileUTR_01090	3355	6240	5420	5040	3953	4490	2040	2827	1965	2940	2042	2540			5616	6252	6943	4690	7660	2070	7792	8197	7228	7229	4990	2774	9566	8418
firstTileUTR_01095	988	1805	1596	1018	1464	1036	335	811	483	443	534	582			1395	1974	1507	1459	3315	967	2263	2250	1661	1707	1622	910	2953	2663
firstTileUTR_01096	1117	2033	1172	870	1557	1502	768	596	586	488	570	733			1930	2443	1736	1798	3512	1102	2868	3011	2311	2609	1988	1056	3878	3226
firstTileUTR_01103	0	0	0	0	0	0	0	0	0	0	1	2			0	0	0	0	0	0	0	0	0	0	0	1	2	1
firstTileUTR_01104	24	247	24	39	83	0	49	0	1	94	40	46			114	41	96	167	73	1	84	93	42	89	43	21	70	69
firstTileUTR_01105	108	272	137	321	85	102	27	52	68	47	39	58			110	57	161	207	52	52	140	126	64	95	77	29	124	66
firstTileUTR_01106	118	235	553	33	167	83	5	112	0	83	69	92			0	0	27	291	150	24	221	162	53	79	56	50	143	153
firstTileUTR_01107	204	100	479	58	63	161	2	141	32	45	37	47			84	115	25	203	0	59	79	65	47	52	22	20	73	68
firstTileUTR_01108	4606	7528	6839	4776	5463	4308	2289	2370	2583	2592	2251	2407			3025	2306	1252	1585	2674	1454	2166	2318	2667	2738	1283	836	2866	2310
firstTileUTR_01109	2779	5050	4866	4346	4026	3467	1978	1426	1535	1861	1773	1960			1577	1607	945	801	1416	451	1437	1466	1953	1666	945	672	2018	1710
firstTileUTR_01110	648	909	945	639	698	454	409	196	292	226	293	355			1091	1538	1492	1730	2173	421	1977	2013	1592	1648	1275	815	2934	2242
firstTileUTR_01111	148	954	579	415	232	490	232	154	64	93	237	266			789	1316	1517	732	904	260	1235	1246	1065	839	1153	588	2245	1980
firstTileUTR_01112	26	338	125	148	0	192	0	0	86	121	64	55			146	117	27	335	110	0	154	181	239	237	103	61	203	167
firstTileUTR_01113	172	337	114	55	133	243	131	117	56	118	50	70			132	115	507	81	140	140	153	192	152	116	77	55	197	96
firstTileUTR_01114	153	394	154	193	64	244	73	119	134	2	90	114			242	572	347	171	297	0	286	265	233	263	198	91	410	325
firstTileUTR_01115	429	405	287	264	439	244	349	183	200	295	112	128			412	426	441	188	430	43	562	656	358	311	222	113	347	350
firstTileUTR_01116	34	0	75	0	0	0	2	28	0	0	13	18			68	133	0	0	17	43	103	121	20	31	20	14	62	48
firstTileUTR_01117	75	22	62	0	83	45	23	26	118	35	21	28			134	159	374	0	141	88	177	217	317	284	49	38	82	85
firstTileUTR_01118	0	106	0	78	41	50	19	51	30	64	25	24			6	191	96	76	29	4	111	134	55	61	27	18	128	85
firstTileUTR_01119	198	96	32	435	222	42	206	23	24	128	64	74			104	104	318	221	265	87	447	383	313	291	158	70	355	310
firstTileUTR_01120	769	972	1728	735	1038	396	455	323	281	330	405	479			539	437	643	484	963	97	655	700	648	702	512	307	1090	836
firstTileUTR_01121	834	2196	1276	1291	1171	1017	583	474	561	688	509	595			574	916	723	335	898	205	1471	1540	997	914	631	367	1294	1083
firstTileUTR_01122	10709	20428	19433	14701	16013	14938	7638	9078	6633	6977	6855	7578			10359	10397	7097	9062	11952	4026	13059	13718	11930	12498	7321	4723	12739	10492
firstTileUTR_01123	6323	10098	9970	6529	8283	6363	3730	4210	3092	4058	3279	3456			6188	4782	4266	5900	5626	2248	6191	6475	5871	5870	3369	2289	5880	4958
firstTileUTR_01124	11255	18675	17220	14345	15128	13133	7447	7276	6095	7069	6272	7095			11376	8898	9980	10288	11815	3619	11201	11434	10264	9893	7914	4126	14729	12980
firstTileUTR_01125	10882	19328	16833	13592	13810	11534	5644	6722	6168	6992	5390	6245			7959	9060	9241	6641	10004	2634	10046	10301	8167	8083	6619	3555	13087	11018
firstTileUTR_01128	880	1133	1404	799	757	770	441	367	217	443	455	461			921	980	1140	1027	1387	746	1375	1327	898	824	798	415	1426	1379
firstTileUTR_01129	336	999	1666	756	632	428	310	224	318	432	379	392			890	1018	1429	301	880	249	666	842	741	573	632	409	1342	1129
firstTileUTR_01130	1064	912	1355	1007	1356	1148	544	706	593	558	500	568			1438	697	2053	915	1320	651	1392	1581	1130	1234	872	493	1617	1515
firstTileUTR_01131	335	764	416	402	466	392	279	270	259	247	174	192			385	299	849	128	475	240	578	463	636	460	384	186	710	571
firstTileUTR_01132	147	207	265	112	140	139	88	24	27	81	64	91			62	200	1	215	195	151	194	176	101	118	77	52	212	138
firstTileUTR_01133	242	128	410	284	55	184	0	0	22	71	74	85			2	4	162	190	197	33	115	182	73	54	71	68	174	162
firstTileUTR_01134	88	218	129	37	0	104	26	0	57	62	81	79			351	115	282	128	30	0	125	89	209	110	109	62	201	183
firstTileUTR_01135	191	634	253	340	246	458	160	166	165	272	145	170			248	449	299	519	481	57	421	422	491	510	174	115	380	322
firstTileUTR_01136	80	0	132	188	0	0	0	47	23	45	26	19			0	0	0	212	71	0	28	22	37	58	61	27	99	55
firstTileUTR_01137	315	288	144	386	174	227	146	227	62	187	87	91			249	233	3	293	238	29	245	306	153	156	123	83	299	270
firstTileUTR_01138	353	1067	905	711	755	792	310	267	194	205	250	288			331	374	428	461	460	263	478	523	515	469	250	164	451	404
firstTileUTR_01139	859	1735	1512	1115	1387	726	614	749	568	537	454	542			951	1177	708	1007	1142	300	868	1074	1118	1261	532	337	999	896
firstTileUTR_01140	254	499	215	413	494	178	234	172	146	158	159	186			133	134	150	24	237	156	271	291	246	193	156	130	367	285
firstTileUTR_01141	287	686	474	368	445	522	290	170	147	232	173	179			234	494	135	21	397	40	350	458	366	326	183	108	347	310
firstTileUTR_01142	94	369	324	369	426	219	183	89	87	95	117	106			230	91	106	209	182	229	191	267	231	196	153	75	201	183
firstTileUTR_01143	5089	7643	9151	6298	6793	5811	3151	3139	2685	3178	2462	2937			11436	9106	10768	9553	11908	3856	12784	12963	11269	10619	6636	4247	14443	11854
firstTileUTR_01144	4427	8412	5854	5027	4752	6030	2492	2678	2152	3179	2155	2440			8152	9102	9802	6416	11824	2748	11432	10893	10341	10653	5608	3412	11646	9814
firstTileUTR_01145	3841	6370	3615	3468	4045	4384	2181	1950	1635	2422	1931	2089			7576	7416	5746	5480	8045	1916	8658	9520	8075	8322	5152	3110	11137	9362
firstTileUTR_01146	3909	8047	7158	4958	5898	4830	2892	3093	2133	2738	1872	2160			8570	8780	8526	6257	12148	2617	10796	11395	10700	10338	5254	3268	10772	9164
firstTileUTR_01147	3852	7263	7265	5915	5027	6314	2256	2985	1936	2515	2270	2679			6904	11023	7733	9277	11829	2624	12499	13170	10085	10197	6411	3756	13453	11540
firstTileUTR_01148	3015	5871	5394	4203	5778	4636	2448	2726	2326	2412	1791	2189			8240	7309	6389	5829	10392	2435	10512	10878	9006	8860	5341	3240	11404	9235
firstTileUTR_01149	4178	5039	6755	4420	4757	3908	1924	2536	1753	2273	2033	2386			3087	3030	3739	2475	4321	647	4107	4812	3721	3903	2713	1529	5358	4576
firstTileUTR_01150	3318	5358	6575	5556	5475	4725	2326	1910	2521	2045	1673	2000			2970	2523	3452	2818	3878	1331	3900	3969	3087	3613	2016	1188	3999	3467
firstTileUTR_01151	3767	6085	5888	4181	4417	3565	1872	2293	1604	2247	2173	2299			4202	4458	3101	3376	4410	1433	4144	4226	4162	3715	2721	1836	5702	4891
firstTileUTR_01152	3322	5335	4004	4147	3873	4645	1904	1859	1884	2206	1689	1926			4095	4633	3193	2783	4691	1668	4370	4719	4156	4219	2230	1501	4835	4089
firstTileUTR_01153	4808	7334	6669	3974	4138	5187	2163	2713	2527	2317	2342	2508			4479	5280	4297	3219	5430	1780	5190	5430	5216	4995	2823	1801	5649	5258
firstTileUTR_01154	2205	3592	3878	3027	3368	2911	1434	1575	1216	1434	1299	1355			3229	2190	3195	1768	4072	1708	3787	3879	2996	3128	1647	1071	3725	3467
firstTileUTR_01155	120	442	547	261	148	233	164	74	37	179	98	93			0	87	85	237	138	132	120	114	76	42	74	45	168	106
firstTileUTR_01156	8209	12010	10612	7880	8771	7529	4017	4440	5255	4250	3997	4326			4789	5113	4665	3781	5286	2128	5342	5702	5857	5738	3661	2358	6447	5406
firstTileUTR_01157	287	166	99	117	103	163	52	156	68	35	90	92			0	37	289	0	48	0	117	79	60	32	45	24	104	99
firstTileUTR_01158	6714	13133	12277	8749	9882	8781	4525	5459	4085	4623	4311	4815			4672	4037	4224	4619	5017	1754	5562	5867	5725	6069	3852	2431	6759	5722
firstTileUTR_01159	2680	4506	4507	2807	3752	2835	1927	1762	1486	1482	1349	1503			2707	2384	2551	1780	3799	1242	3379	3532	2687	2561	1535	821	3723	2931
firstTileUTR_01160	1398	3057	3411	2179	2171	2538	1260	1233	996	1114	860	914			1184	1916	1385	778	1724	635	1847	2083	1765	1758	940	480	2116	1794
firstTileUTR_01161	2265	3559	3380	2448	2306	1989	1062	1509	855	1150	921	1116			2797	2161	1999	1222	2366	742	2454	2574	1936	2159	1203	715	2957	2533
firstTileUTR_01162	1869	2985	3003	2919	3116	2527	1082	1567	1129	1326	954	1039			2355	2525	2074	1768	2557	856	2655	2897	2499	2243	1184	698	3007	2463
firstTileUTR_01163	87	69	212	229	104	63	103	44	0	20	61	64			522	127	208	596	373	0	281	156	266	199	247	117	435	425
firstTileUTR_01164	0	123	1	87	50	65	22	13	0	0	29	31			54	133	87	234	53	0	141	232	57	62	195	64	254	171
firstTileUTR_01165	9993	17434	18198	10026	13774	11180	6313	6866	5444	5848	5714	6486			15638	16275	17799	12506	21758	5317	20876	22519	16944	16607	12479	7294	25733	22227
firstTileUTR_01166	10546	18140	14837	10258	13075	10762	6177	6513	6227	6181	5541	6726			14248	16170	14243	11539	19010	4885	19641	19803	15406	15186	11726	6901	23861	20540
firstTileUTR_01167	61	106	16	0	210	62	17	36	0	90	32	28			0	55	0	0	25	0	38	35	66	74	22	13	27	32
firstTileUTR_01168	0	0	0	23	23	0	0	0	0	0	9	16			0	0	0	0	17	0	2	5	3	4	9	6	17	21
firstTileUTR_01169	20	0	47	0	2	0	34	29	34	24	39	35			65	0	0	0	26	0	33	18	46	31	20	12	75	40
firstTileUTR_01170	51	148	46	49	0	46	21	59	26	0	19	21			0	101	0	0	0	125	10	41	32	14	22	4	32	20
firstTileUTR_01171	174	438	294	320	86	272	189	91	37	26	53	80			57	219	0	93	42	101	161	155	109	142	68	40	94	98
firstTileUTR_01172	56	560	167	215	121	145	80	145	68	143	100	87			0	108	121	71	215	38	181	130	229	223	112	67	170	166
firstTileUTR_01173	167	221	242	314	0	210	25	113	96	146	69	58			286	88	155	302	134	0	162	195	121	159	96	52	150	134
firstTileUTR_01174	64	367	123	131	129	51	34	107	40	84	97	71			133	261	254	266	202	0	306	244	113	134	123	77	233	154
firstTileUTR_01175	220	898	500	429	265	472	219	279	215	461	146	189			1006	1465	864	578	1885	212	1988	2084	1571	1512	807	533	1368	1345
firstTileUTR_01176	411	534	574	281	256	232	290	150	76	239	131	177			2237	885	951	521	1242	829	1899	1951	996	1100	779	442	1450	1235
firstTileUTR_01177	3472	5480	5434	3954	4623	3092	1824	2258	2193	2201	1775	1754			369	354	536	495	558	167	424	459	615	561	259	183	618	566
firstTileUTR_01178	1940	3345	3347	3755	2691	2403	1374	1543	1543	1147	1120	1333			611	409	160	791	747	422	555	586	702	743	349	193	649	608
firstTileUTR_01179	465	959	1321	624	993	566	408	639	508	323	456	474			2194	1468	1804	915	1780	865	2487	2718	1690	1717	1281	734	2225	1790
firstTileUTR_01180	1032	1143	1147	929	1022	975	286	346	261	436	400	477			1654	2584	2522	1078	2690	545	2698	2727	1870	1922	1473	836	2732	2342
firstTileUTR_01184	0	0	0	0	0	0	0	0	0	0	4	6			0	0	0	0	0	0	0	0	0	0	9	1	9	10
firstTileUTR_01185	3238	4161	4422	3914	4709	4554	2300	2198	1903	1974	1439	1674			5979	6294	4931	4307	7807	1759	7433	7657	6383	6126	3438	2124	6786	5719
firstTileUTR_01186	1652	3759	2865	2425	2951	2294	872	786	933	1441	906	1104			4597	3587	3187	3450	5108	1236	4197	4662	4055	3904	2175	1348	4337	3571
firstTileUTR_01187	3702	4207	3506	3851	3462	3703	1645	2098	2278	2009	1592	1692			4930	5025	5967	4356	7076	1978	6981	6948	5619	5937	3400	2106	6746	5669
firstTileUTR_01188	1277	3231	3212	2103	1967	1577	927	982	1021	1068	748	843			3326	3373	4118	2843	3532	1020	3951	3946	3349	3458	1765	1038	3467	2713
firstTileUTR_01192	0	0	0	113	0	0	0	0	0	0	4	2			0	0	0	0	0	0	8	7	15	3	1	1	9	8
firstTileUTR_01193	4277	8672	7349	5158	7032	5486	2331	3306	2419	3164	2100	2417			4459	5131	4855	3638	5889	2129	5844	5797	6083	5571	2786	1691	5749	5146
firstTileUTR_01194	3220	6299	6280	4793	3574	3743	2320	2664	2067	2430	1986	2146			3283	4011	4523	2853	4544	758	4836	5153	4704	4570	2375	1533	5216	4354
firstTileUTR_01195	2183	3923	3225	2818	3595	1982	1099	1530	880	1208	1488	1604			3596	4104	3554	3141	4436	1681	4823	4969	3572	3333	3331	1758	6092	5199
firstTileUTR_01196	3110	6704	3711	3181	3766	2878	1791	1444	1039	1702	1599	1891			4638	4883	5203	3879	6059	1865	6209	6286	4415	4702	4312	2446	7831	6656
firstTileUTR_01197	3369	5885	4658	3079	3673	2823	1709	1958	1747	1632	2157	2311			5531	7257	4903	3266	6433	2344	6973	7366	5943	5669	5632	3110	11552	9739
firstTileUTR_01198	1943	3820	2954	2732	2694	2979	1242	1994	1230	1441	1207	1426			4041	3844	3704	4112	5193	1460	5524	5344	4349	4688	2804	1715	5655	4608
firstTileUTR_01199	875	1021	699	674	1049	931	282	537	246	481	399	512			380	331	323	144	480	132	525	555	593	512	375	270	617	540
firstTileUTR_01200	1004	1086	1093	773	849	897	452	394	229	388	316	351			583	292	275	360	415	150	372	390	452	379	235	150	459	367
firstTileUTR_01201	159	890	364	443	270	261	143	202	126	146	194	217			183	204	0	157	123	142	139	136	101	123	141	100	243	191
firstTileUTR_01202	149	675	708	403	421	85	197	57	235	108	153	157			4	133	1	112	155	28	137	99	137	204	117	87	205	167
firstTileUTR_01203	359	454	325	153	389	70	206	272	166	220	143	222			364	394	323	571	594	65	737	742	553	488	295	181	671	484
firstTileUTR_01204	459	796	364	504	484	363	199	218	210	135	258	291			282	530	605	338	540	136	806	733	479	436	396	290	859	834
firstTileUTR_01205	3390	5967	5313	4197	5857	3649	2466	2302	2041	2360	1853	2183			5865	4441	4304	4002	5954	1641	5867	5988	5230	5022	3301	1943	6530	5707
firstTileUTR_01206	5305	7226	7091	5052	6905	5563	3163	2874	2114	2988	2615	2827			6839	6407	5713	4174	6917	1827	8391	8676	6675	6149	4372	2568	8792	7566
firstTileUTR_01207	1134	1327	2177	1558	1258	818	797	965	348	490	708	745			1287	747	492	1144	1132	557	1273	1314	1020	1031	727	425	1276	1152
firstTileUTR_01208	1029	2114	1324	1100	1269	1170	688	777	557	631	586	767			988	1761	1038	940	1418	449	1566	1698	1540	1539	1038	539	1723	1573
firstTileUTR_01209	757	1401	955	1212	1254	583	518	865	644	504	452	577			743	501	272	862	1045	304	869	943	762	758	544	265	890	857
firstTileUTR_01210	832	1737	1669	1139	1120	821	414	412	598	515	585	678			275	657	446	304	607	210	509	499	546	602	414	238	837	604
firstTileUTR_01211	801	1051	1138	1613	725	1000	404	460	385	603	404	454			640	406	573	720	993	351	837	858	712	598	392	244	796	573
firstTileUTR_01212	7880	14634	12171	9854	12394	10428	5122	5921	4192	4563	4974	5496			20752	26446	22495	19393	30272	7026	33729	34891	22657	22465	20565	10741	35685	30288
firstTileUTR_01213	7890	12556	12830	8607	10367	9319	4663	4964	4106	5206	4584	5386			20793	21671	20730	18350	27153	6193	29691	30290	22135	21565	20057	10532	34220	28912
firstTileUTR_01214	3768	7407	5263	4317	4601	4848	2314	2410	2191	2076	1976	2435			1886	2264	1574	2302	2160	498	2028	1994	1952	1809	1305	753	2798	2424
firstTileUTR_01215	4235	8216	7945	5840	6056	6083	2918	3476	2774	2931	2637	3055			1949	2458	2912	2752	2985	764	2623	2866	2359	2125	1662	1011	3838	3307
firstTileUTR_01216	1794	3231	2021	1662	2169	1708	766	842	830	838	747	879			998	1516	1001	1687	1836	383	1684	1855	1693	1694	926	635	1864	1529
firstTileUTR_01217	1703	2868	2727	2238	2187	2304	940	799	890	1042	847	1012			1600	1453	1308	963	1903	461	1795	2011	1711	1895	1042	692	2096	1751
firstTileUTR_01218	808	1833	1051	991	1392	1033	532	414	396	431	595	761			1080	887	1245	135	812	330	1043	1000	954	858	715	424	1304	1082
firstTileUTR_01219	1294	2149	1671	1359	2366	2233	978	1161	857	964	864	880			3003	1355	1583	1776	2349	767	2601	2512	2038	2020	1164	765	2448	1916
firstTileUTR_01220	1807	2091	1936	1148	1542	2138	1098	965	798	1111	589	677			1256	1196	822	1008	1609	443	1389	1626	1409	1146	707	418	1243	1106
firstTileUTR_01221	1648	2862	3209	2300	2184	1899	1139	1143	1171	823	807	937			2013	2191	1532	1380	2167	446	2252	2267	2460	2243	1111	754	2241	1889
firstTileUTR_01224	0	25	0	0	0	0	0	53	0	8	0	8			16	0	21	0	5	0	3	4	33	12	4	3	7	25
firstTileUTR_01225	0	55	0	0	47	0	0	0	21	0	0	0			0	0	0	0	17	16	0	7	22	16	2	1	23	9
firstTileUTR_01226	0	0	0	0	0	0	0	0	0	0	18	5			0	0	0	0	0	0	0	0	0	0	15	5	19	21
firstTileUTR_01227	0	0	0	0	0	0	64	73	0	0	10	7			0	0	0	86	50	0	85	94	7	18	20	15	54	38
firstTileUTR_01228	0	0	0	0	0	0	0	0	0	0	9	2			0	0	0	0	0	0	0	0	0	0	13	5	15	12
firstTileUTR_01229	1726	2599	3391	2194	2615	2187	1164	1244	872	1328	840	990			2355	1521	1304	919	2370	749	2330	2324	2325	2417	1163	730	2533	2248
firstTileUTR_01230	1175	2307	2185	1795	1906	954	810	658	461	744	650	682			1861	1137	1585	986	1782	317	1769	1856	1601	1650	980	599	1927	1581
firstTileUTR_01233	8254	12897	12301	10877	10254	10405	5201	5783	5146	5116	4544	4849			8479	7248	6940	7660	8735	3238	7985	8512	8236	8257	4858	3177	10092	8634
firstTileUTR_01234	6857	12408	11580	9891	9291	8736	4465	4685	3849	4554	3919	4317			6113	5758	4308	4787	6314	2059	5895	6492	6301	6608	3570	2427	7335	6203
firstTileUTR_01235	8521	14572	12655	9436	11127	8732	5204	5605	4926	5202	3825	4361			6798	7785	7258	4015	8510	2559	7303	7981	8133	8228	3954	2619	8396	7272
firstTileUTR_01236	8077	12218	13517	9142	11799	9337	5133	6490	4663	4897	4186	4571			7703	8189	6668	6388	9074	2970	8623	9211	8601	8549	4776	3085	10101	8805
firstTileUTR_01237	5860	10697	9020	6214	6390	6183	3468	3831	3186	3341	2909	3177			4283	5341	2895	3260	4494	2018	4731	4879	5239	5089	2698	1738	5404	4645
firstTileUTR_01238	416	1052	323	447	280	402	220	68	125	118	148	231			459	341	333	294	256	114	314	356	310	224	241	135	397	382
firstTileUTR_01239	505	717	432	422	514	602	353	317	269	276	214	249			187	425	284	217	468	135	649	637	420	407	344	166	529	424
firstTileUTR_01240	0	0	0	0	0	0	0	0	0	0	0	0			0	0	0	0	0	0	0	0	0	0	1	0	3	4
firstTileUTR_01244	666	1033	621	626	904	912	382	430	350	464	400	375			305	373	77	555	575	246	495	656	617	663	359	221	680	538
firstTileUTR_01245	1026	1192	919	1249	905	548	329	476	436	578	378	396			1275	1085	820	674	751	143	623	773	707	753	342	247	625	582
firstTileUTR_01246	315	604	393	683	1099	389	260	436	229	273	229	283			162	355	49	557	382	106	377	413	439	457	195	157	421	324
firstTileUTR_01247	257	493	672	241	500	324	213	197	124	287	226	262			253	325	54	118	188	147	299	290	247	269	181	105	360	281
firstTileUTR_01248	0	0	0	0	0	0	0	0	0	0	0	3			0	0	0	0	0	0	0	0	0	0	2	0	1	7
firstTileUTR_01249	0	0	0	0	0	0	0	0	0	0	0	0			0	0	0	0	0	0	0	0	0	0	0	0	0	1
firstTileUTR_01250	101	134	0	182	1	0	64	68	0	37	4	6			0	0	0	0	10	1	39	43	12	2	0	1	2	4
firstTileUTR_01251	0	0	0	0	0	0	0	0	0	0	2	0			0	0	0	0	0	0	0	0	0	0	1	0	0	0
firstTileUTR_01254	1267	2405	1904	1606	2063	1412	1108	906	743	829	743	872			791	1323	1309	1399	1534	703	1803	1850	1717	1616	875	630	1736	1465
firstTileUTR_01255	1584	2077	3109	1577	1530	1851	976	963	693	1042	830	915			1064	1126	1384	470	1831	878	1779	1872	1744	1919	1075	644	1967	1648
firstTileUTR_01256	4301	7080	6207	4595	4697	4915	2240	2152	2447	3262	2247	2631			6302	5533	5988	5315	6171	1848	6596	6518	5803	5938	4324	2414	8178	6949
firstTileUTR_01257	7189	13975	11507	9650	10968	8508	4378	5579	3897	4848	3959	4536			7529	8983	9331	7632	11194	2699	10981	11385	9828	9344	6013	3625	11741	10170
firstTileUTR_01258	2636	3831	3465	3152	3654	3085	1244	1747	1468	1564	1390	1639			4292	3389	2892	3140	4156	1480	4376	4591	4362	4312	2673	1637	5488	4916
firstTileUTR_01259	5594	9712	8160	6775	7449	6092	3977	3602	3101	3493	3469	3863			7928	6582	6982	5800	8155	2577	8825	9247	7143	7180	5376	3253	10353	9538
firstTileUTR_01260	12451	17851	17126	13507	13825	9754	6454	6702	5241	7183	6060	6596			16863	16030	13703	10344	17945	5510	20043	20903	13159	13069	13521	6908	23544	19687
firstTileUTR_01261	12600	20383	19530	12644	16213	13492	7847	8201	7113	7482	6927	7939			17580	17372	18367	14505	22058	5350	23335	24240	16580	16744	16300	8447	28020	23858
firstTileUTR_01262	16	0	0	0	39	0	0	0	0	0	4	5			0	0	0	0	23	0	5	0	14	19	5	1	20	8
firstTileUTR_01263	0	88	0	0	0	23	0	0	20	0	5	4			0	54	0	0	0	0	6	6	18	11	1	2	3	12
firstTileUTR_01264	3818	5934	5733	4314	5295	5047	1759	2156	1841	2194	2132	2300			5134	4403	4326	3073	6250	1642	6177	5976	5528	5623	3528	2212	6815	5946
firstTileUTR_01265	3387	8007	7347	4594	5132	5044	1778	2078	2699	3103	2528	2786			3458	4493	5170	4009	6209	1666	6334	6524	7082	6989	4094	2691	7776	7175
firstTileUTR_01266	11543	17408	16486	13200	12136	12128	5500	5395	5230	6364	5405	6364			11033	10254	11395	9237	12135	3767	11493	11532	10956	10519	6885	4082	14165	12385
firstTileUTR_01267	10765	19120	17131	11828	12274	11564	5570	6465	5913	6278	5714	6480			12090	11403	10341	7952	12122	3340	11633	12223	10757	10991	6707	4325	14177	12300
firstTileUTR_01268	0	0	0	0	0	0	0	0	0	0	5	3			0	0	0	0	0	0	0	0	0	0	0	0	4	3
firstTileUTR_01269	49	24	72	51	19	0	0	0	46	0	12	10			0	0	37	0	0	0	14	32	19	9	4	1	11	8
firstTileUTR_01270	128	139	325	76	384	224	194	194	127	136	153	160			109	49	18	97	99	93	212	235	132	142	181	116	401	331
firstTileUTR_01271	66	384	129	29	162	0	41	13	69	54	40	31			63	157	225	219	204	64	75	103	138	158	61	33	139	117
firstTileUTR_01272	624	1372	858	386	575	551	361	329	374	261	227	270			307	373	437	555	266	90	486	411	346	331	237	160	434	428
firstTileUTR_01273	629	1089	781	1036	799	1108	424	409	425	282	326	285			526	368	193	361	464	330	551	549	456	405	249	135	468	400
firstTileUTR_01274	5535	8469	7216	7364	7532	5551	3144	3674	2791	3179	2807	2979			6074	3816	4015	4776	4994	1889	4847	5254	4750	4892	2685	1633	5780	4876
firstTileUTR_01275	6299	9723	8001	6819	7163	6392	3491	4005	2725	3521	3211	3426			6742	7103	5994	5346	8081	2246	7368	7583	6539	6965	4315	2654	8779	7524
firstTileUTR_01276	5654	9345	7962	6420	7105	5228	2636	3659	2501	2949	2868	3303			5007	5799	4888	4610	6337	2425	6720	6570	5765	5984	4123	2390	7370	6439
firstTileUTR_01277	3680	6592	7254	5161	4858	5395	2421	2536	2554	2198	2342	2774			3720	4275	3388	4110	5034	1397	5077	5302	4612	4648	3217	1868	5748	4919
firstTileUTR_01278	4656	8059	7804	5364	6430	5406	2710	3644	2061	2618	2801	3016			5565	6059	5061	3002	5596	1463	6048	6218	5136	5157	3926	2431	7256	6240
firstTileUTR_01279	3111	4924	2977	4658	3337	3051	1403	1997	1510	1983	1619	1836			2232	2616	2143	2713	2678	939	3221	3367	3040	3280	1753	1100	3343	2895
firstTileUTR_01280	3915	6330	3968	3249	4740	3264	1996	2275	2288	2584	1782	1935			1836	2108	1583	2015	3366	1126	3300	3525	3624	3581	2010	1305	3661	3157
firstTileUTR_01281	205	434	155	201	364	325	120	194	287	125	137	158			320	478	514	676	698	85	996	1061	751	740	383	306	873	654
firstTileUTR_01282	156	280	256	174	240	279	49	133	91	60	110	154			219	360	122	204	477	84	196	218	339	378	333	229	714	659
firstTileUTR_01283	228	187	156	81	413	81	168	147	89	160	128	136			766	810	483	225	904	114	727	654	442	546	361	261	1019	729
firstTileUTR_01284	220	220	344	138	405	139	174	88	43	94	94	77			688	749	352	768	994	0	749	650	500	572	291	179	668	540
firstTileUTR_01285	0	0	0	0	0	0	0	0	0	0	2	1			0	0	0	0	0	0	0	0	0	0	1	2	2	0
firstTileUTR_01286	0	0	0	0	0	0	0	0	37	0	13	10			0	20	0	0	1	0	0	0	5	2	6	1	9	9
firstTileUTR_01287	51	163	52	97	19	156	4	35	42	48	81	91			33	144	71	176	127	0	80	115	124	74	133	85	234	160
firstTileUTR_01288	388	1178	997	993	704	675	301	200	156	262	253	328			380	416	673	363	618	152	786	749	660	599	397	222	783	630
firstTileUTR_01289	5665	11259	11126	9668	10296	7400	4398	4870	3640	3778	4031	4356			6395	8591	6820	5594	8728	2798	8254	8621	7396	7235	4828	2910	9179	7759
firstTileUTR_01290	5532	11249	9498	7559	9154	7538	3180	4590	3803	4162	3812	4182			5191	6890	6548	4247	6661	2138	6972	7344	5795	5741	4548	2592	8649	7425
firstTileUTR_01291	6311	11356	11245	8334	8398	7505	3907	3970	4181	4458	3689	4025			8160	5846	5713	5659	6068	2522	6197	6773	6576	6191	3750	2316	6693	5599
firstTileUTR_01292	8094	13768	10818	10882	10959	10124	5492	4524	4017	4300	4100	4501			6668	7134	5518	6283	8332	2752	8110	8222	7434	7456	4578	2807	8245	7147
firstTileUTR_01293	9942	14857	12942	12411	12178	12866	5913	6034	5363	5780	5177	5917			12529	11235	11343	9408	12778	3438	13114	13132	11018	10677	8302	4791	15946	13432
firstTileUTR_01294	6188	11825	9619	7342	7925	8554	4347	4299	4154	4666	3747	4267			6404	7380	7579	6042	9119	2085	8501	8890	7928	8016	5555	3129	10861	9028
firstTileUTR_01295	9831	17353	15220	10653	11717	12039	5098	6409	4689	5113	4611	5314			9679	12230	11236	9002	12486	3077	13337	13715	10654	10597	7207	4155	13724	11919
firstTileUTR_01296	8541	13026	10089	9349	11427	7951	4528	5021	4124	4084	4346	4841			9225	7955	6524	7406	10843	2279	10545	10962	8315	8159	6782	3942	12726	11285
firstTileUTR_01297	5325	10227	9224	6292	8534	6903	3419	3650	3014	3534	3142	3513			6699	5742	6224	3234	8535	2411	8089	7764	6423	6332	4705	2717	9025	7825
firstTileUTR_01298	172	450	123	267	64	126	55	222	91	42	192	254			497	293	243	246	170	43	244	282	260	350	245	141	501	382
firstTileUTR_01299	413	716	382	237	310	334	247	186	58	111	174	209			74	319	450	192	384	134	359	386	152	137	190	137	387	349
firstTileUTR_01300	815	1273	1087	1480	1014	945	352	601	449	586	498	622			542	508	549	611	510	399	573	690	533	512	351	223	768	667
firstTileUTR_01301	1350	1488	1461	1567	1737	1587	945	878	607	1021	543	573			410	564	973	526	561	366	812	888	741	875	341	232	767	611
firstTileUTR_01302	796	1581	1593	1723	1382	1119	999	1094	929	657	623	725			1292	1010	563	1091	1297	172	1432	1443	1051	1202	876	528	1544	1314
firstTileUTR_01303	722	1269	818	1515	1314	1136	488	496	514	470	356	392			641	894	465	685	759	446	1077	937	853	955	440	230	771	623
firstTileUTR_01304	2266	3746	4001	2211	2372	2301	1215	1370	988	1481	1030	1223			2942	4456	4790	2891	4954	883	4634	4814	4114	4151	1732	950	3787	3560
firstTileUTR_01305	2210	3637	2926	2066	3331	2412	1294	1396	939	890	1185	1266			3977	4543	2313	2258	4516	839	4051	4135	3909	3590	1794	978	3998	3649
firstTileUTR_01306	1491	2131	1774	1722	2185	1659	1078	1018	651	614	917	1007			1616	930	765	736	1526	372	2126	2079	1507	1375	1379	681	2091	1884
firstTileUTR_01307	1609	3318	2143	1855	1637	1461	829	1046	895	891	810	848			1509	1334	969	668	1686	474	2267	2093	1083	1241	1049	524	1608	1368
firstTileUTR_01308	2432	4291	4388	2448	3077	2291	1750	2182	1317	1951	1217	1346			4144	3362	4003	3254	5155	918	4882	5369	4766	4869	2527	1587	4860	4356
firstTileUTR_01309	3238	4209	3580	3501	4306	3755	1739	1845	1827	2449	1500	1785			4617	3863	4826	3558	6104	1661	5920	6068	5636	5248	3169	1923	6343	5611
firstTileUTR_01310	27	0	0	0	54	43	44	72	17	13	8	7			62	123	0	0	63	0	30	27	6	38	12	8	25	16
firstTileUTR_01312	14962	22224	22752	17213	19214	16344	8375	8638	7405	8719	7658	8824			9924	10875	11434	7662	11959	3415	10991	11645	11404	11379	6747	4236	14753	12958
firstTileUTR_01313	10016	14991	13787	11205	10888	11337	5281	6141	5155	6262	4801	5541			6533	7402	6812	6533	7809	2558	7660	8139	7169	6871	4509	2642	9102	8219
firstTileUTR_01314	12728	20156	20051	14826	17525	14343	6738	8229	6966	7755	6443	6791			9251	10184	9602	7635	10576	3161	9637	10600	9865	9523	5269	3353	11750	10152
firstTileUTR_01315	12378	18885	15539	12680	15108	13923	6915	8661	5865	6679	5858	6345			7035	8840	6621	7394	9911	2813	8777	9398	8751	8521	4916	2862	10092	8898
firstTileUTR_01316	323	507	341	396	249	477	132	47	0	114	77	100			222	167	223	235	62	0	159	143	107	89	63	40	147	80
firstTileUTR_01317	209	171	159	226	112	241	77	187	63	91	111	124			65	152	67	12	60	167	120	147	89	75	75	48	144	148
firstTileUTR_01318	0	43	325	0	125	101	0	117	18	62	74	69			0	22	0	2	95	0	42	59	31	24	48	29	101	86
firstTileUTR_01319	87	320	326	161	163	118	99	139	185	190	68	51			0	119	49	185	278	34	220	199	136	170	50	30	133	76
firstTileUTR_01320	3822	6208	6463	4567	4703	5686	2304	2872	2173	2062	1986	2059			3025	2862	2365	2532	3803	1515	3732	3902	3832	3882	1961	1366	4729	4067
firstTileUTR_01321	4031	5755	5636	4575	4485	5209	2205	2258	1896	1995	1746	1906			5392	4196	4275	2265	6192	1193	4631	4601	4505	4527	2147	1550	5343	4438
firstTileUTR_01322	3120	5109	4761	4120	3683	3544	2011	2423	1891	1797	1717	1862			1470	1154	1147	849	1402	508	1174	1141	1027	1050	809	496	1528	1439
firstTileUTR_01323	4066	6280	6688	4886	4533	5195	2315	2665	2208	2585	1981	2117			1435	1651	1226	1238	1648	342	1577	1554	1547	1428	925	620	1911	1566
firstTileUTR_01324	68	0	26	27	48	23	34	0	0	0	5	6			0	0	56	0	14	0	11	8	19	12	4	2	30	8
firstTileUTR_01325	27	4	0	0	66	0	67	0	0	21	7	10			0	31	0	0	34	0	38	47	21	14	14	8	26	16
firstTileUTR_01326	6059	10574	9100	8327	7853	7230	3553	3802	3584	4135	3148	3637			4333	4948	4195	4422	6073	2422	5759	6182	5637	5423	3346	2297	7019	6070
firstTileUTR_01327	3665	5423	5882	4149	5310	4219	3065	2370	2250	2078	1877	2041			3109	2648	2552	2671	3970	1154	3795	4329	3996	3684	2104	1323	4106	3558
firstTileUTR_01328	6280	9523	6629	5312	7710	7819	3699	3218	2871	2820	2976	3499			5152	5550	3301	4996	7248	1597	6302	5944	5427	5587	3823	2420	7559	6496
firstTileUTR_01329	3509	5574	4668	3826	4732	3292	1828	2428	1977	1708	1693	1890			3447	2702	3266	2661	3871	739	3581	3579	2954	3103	1958	1250	4107	3429
firstTileUTR_01330	8789	16259	12832	9730	11748	9678	4678	5403	4849	4695	4791	5081			5698	4374	2977	3590	5448	1711	4756	5156	5674	5780	3120	2184	5798	4678
firstTileUTR_01331	9278	13986	12487	9700	11600	11227	4967	6131	4691	5519	5114	5421			5058	3805	2777	2790	4990	2304	5163	5616	6323	5906	3113	2138	5596	4753
firstTileUTR_01332	7541	14713	11284	10254	11692	9329	5711	5676	3865	5035	4052	4780			13163	15597	15196	11183	19227	5306	20250	19921	15488	15852	11605	6709	22159	18834
firstTileUTR_01333	8946	13735	14373	9765	12806	9086	5022	5281	4481	5351	4659	5500			18094	17112	16165	14657	21517	5651	21009	21708	16257	16462	12945	7263	24313	21019
firstTileUTR_01334	0	0	0	0	0	0	0	0	0	0	1	7			0	0	0	0	0	0	0	0	0	0	11	4	15	9
firstTileUTR_01335	2	0	72	0	250	33	20	55	0	0	35	23			0	0	0	1	105	0	36	31	11	32	34	22	48	64
firstTileUTR_01336	3600	6903	4958	3743	4424	4920	2334	1604	2168	2153	1725	2002			8159	7325	6089	5114	7265	2025	7645	8451	7476	7465	4395	2691	8637	7445
firstTileUTR_01337	3987	7475	6385	5283	6032	5771	2550	2875	2355	3147	2351	2742			8691	9003	6641	8025	10710	3026	10232	10348	9244	8875	6182	3541	11397	9866
firstTileUTR_01338	4568	8055	5931	5614	5669	5303	2162	2958	2798	2798	2467	2574			8308	7781	8680	6629	10283	2806	9382	9643	8103	8389	5690	3200	10278	8622
firstTileUTR_01339	2604	4671	4209	3690	2381	3051	1253	1623	1708	1576	1388	1778			5989	5980	6770	5212	5559	1937	7789	8628	6318	6027	4008	2300	7618	6199
firstTileUTR_01340	3618	6062	6704	4628	5031	4045	2543	2654	1994	2200	1872	2146			6959	5923	6283	6524	10294	2434	9568	9873	7136	7359	4424	2600	8383	7644
firstTileUTR_01341	571	825	1273	1111	699	1078	294	510	213	344	272	336			851	758	1404	1092	1578	378	1382	1351	1009	1047	821	489	1708	1367
firstTileUTR_01342	558	1124	1450	305	626	858	266	315	251	437	266	309			789	809	1644	1517	1330	698	1240	1375	1057	1213	820	448	1606	1354
firstTileUTR_01343	173	301	349	227	249	256	49	24	112	95	175	223			234	315	356	179	718	96	504	633	317	375	539	339	884	886
firstTileUTR_01344	437	932	468	382	922	540	425	105	164	383	271	294			769	642	718	586	1111	254	1115	1185	915	879	821	434	1486	1290
firstTileUTR_01345	3734	7367	7359	4250	5890	4834	2712	2409	1896	2496	2178	2369			9737	9262	7449	8210	13172	3011	10856	11729	9036	9211	6272	3627	12136	10042
firstTileUTR_01346	4752	7338	7239	5983	4725	4950	1933	2610	2527	2596	2351	2776			9178	8827	9616	7409	9654	2616	10799	11350	8628	8548	6473	3807	12508	10460
firstTileUTR_01347	6584	10276	10036	8093	9504	7781	3803	4080	3363	4542	3386	4000			16711	13731	13469	12111	18581	5448	16888	18396	15424	15880	10196	5723	18612	16243
firstTileUTR_01348	6494	10486	9100	8458	7765	7340	4274	4201	3676	3619	3277	3752			12324	12473	12974	9990	16322	4867	16016	16216	13774	13649	9012	5264	17264	14753
firstTileUTR_01349	2774	4809	4265	3676	4142	3428	1649	1962	1912	1656	1782	2211			3883	3083	2722	3152	3848	1199	4002	4151	3564	3277	2666	1655	5079	4294
firstTileUTR_01350	2583	3740	4507	3053	3502	2334	1720	1549	1228	1642	1218	1330			3242	3282	2335	1674	3206	719	2955	3016	2605	2728	1691	1036	3162	2603
firstTileUTR_01351	0	0	52	0	0	37	0	0	0	0	0	1			0	0	0	0	0	0	2	0	0	2	0	0	0	0
firstTileUTR_01352	0	0	4	0	0	0	0	0	0	0	0	2			0	0	0	0	0	0	10	0	0	8	0	2	4	2
firstTileUTR_01353	133	190	61	125	177	59	0	58	43	69	59	49			71	246	63	0	155	0	123	211	177	163	79	61	177	173
firstTileUTR_01354	18	35	109	28	106	26	61	0	21	3	48	68			0	1	0	0	65	0	87	88	32	50	64	39	171	106
firstTileUTR_01356	15	184	125	0	45	151	47	0	76	48	43	46			41	123	57	0	101	0	68	134	110	98	75	45	150	148
firstTileUTR_01357	58	252	246	97	194	270	70	40	115	81	116	108			208	31	0	111	127	0	130	117	99	72	78	37	151	113
firstTileUTR_01358	234	255	131	149	74	230	129	21	84	67	171	176			317	151	144	0	58	0	108	112	112	82	131	72	213	176
firstTileUTR_01359	3124	5930	4287	3859	4565	3772	1515	2261	1804	1808	1802	2223			7672	7847	6086	6095	10818	2680	10305	10584	8027	8105	5700	3577	10525	8766
firstTileUTR_01360	2647	4414	3650	3186	2291	2631	1360	1447	1429	1266	1406	1574			6622	5976	5736	4094	7184	1972	8071	7979	5911	6178	4171	2466	7670	6446
firstTileUTR_01361	302	791	610	759	707	108	97	237	207	124	156	130			439	395	234	113	661	164	457	400	397	402	189	134	465	425
firstTileUTR_01362	578	756	969	1043	510	555	399	307	617	288	228	264			674	880	462	376	451	34	779	744	703	613	375	241	868	664
firstTileUTR_01363	294	746	365	179	556	342	209	217	207	155	225	235			426	319	209	137	380	185	529	516	512	417	262	164	586	556
firstTileUTR_01364	497	683	458	585	281	339	413	94	60	286	177	172			480	749	392	200	607	145	638	702	436	475	234	157	485	409
firstTileUTR_01365	750	1489	1404	792	1356	1391	845	929	629	692	539	518			438	826	589	555	809	371	1009	1074	866	938	588	348	1154	954
firstTileUTR_01366	909	2034	2231	1524	1247	916	741	1280	466	777	408	535			940	718	667	876	1272	502	1247	1271	1207	1005	478	312	1102	923
firstTileUTR_01367	1118	1693	2036	1331	1439	2001	607	821	1027	868	593	589			1410	889	1298	760	1050	367	1143	1200	1262	1340	638	394	1228	1020
firstTileUTR_01368	429	1067	1485	702	1067	933	458	586	408	296	428	491			654	613	598	475	765	0	809	939	526	552	521	318	996	902
firstTileUTR_01369	2432	5025	5656	3875	4016	3329	1632	1910	1376	1800	1799	1915			1936	1862	2022	948	2449	718	2084	2107	2038	2033	1155	787	2492	2170
firstTileUTR_01370	4095	5091	4555	3909	3615	3618	1751	2009	1709	1782	1581	1769			2037	1991	1534	1168	2326	1060	2278	2495	2178	2145	1198	805	2665	2356
firstTileUTR_01371	3142	5741	4185	3516	3260	3835	2243	1923	1788	1959	1827	2095			1232	853	1246	1757	1980	594	2286	2235	1998	2154	1121	790	2456	2095
firstTileUTR_01372	3923	8371	6219	4894	5152	5032	2560	2923	2067	2893	2258	2659			3130	2152	2583	1020	2876	1079	2474	2989	2737	2953	1594	1044	3331	2806
firstTileUTR_01373	7902	13066	12401	9411	11141	9036	4734	5949	4409	4897	4168	4614			8467	7574	8709	6848	10828	3509	11418	12690	9311	9156	5911	3506	11458	9522
firstTileUTR_01374	11749	18826	18559	16240	16986	14083	7524	7124	6600	7493	6319	7515			11704	12520	12400	11830	13769	4737	17069	17147	13464	13039	8753	5175	17226	14461
firstTileUTR_01375	2981	5385	3392	4424	3480	2661	1658	1811	1502	1905	1317	1573			5048	5322	4083	3303	5896	1900	6446	6361	5197	5246	2974	1776	6162	5175
firstTileUTR_01376	3046	5400	5209	3137	4990	4909	2401	2572	1954	2281	1791	2001			5987	5993	6966	5360	7581	2405	7552	7756	6716	6363	3849	2272	7990	6772
firstTileUTR_01377	2580	4810	2877	3079	4010	3397	1640	1420	1465	1537	1373	1564			2992	2747	1926	3233	4004	981	3671	3761	3322	3428	2044	1318	4614	3809
firstTileUTR_01378	2923	4994	3968	3732	3748	4340	2208	2049	1827	2196	1514	1737			3318	3445	2963	2773	3903	917	3653	3630	3766	3971	2098	1255	4199	3678
firstTileUTR_01379	7071	11761	10665	8576	10624	7604	4640	5004	4592	4722	3837	4335			4837	5841	6291	5274	8312	2839	7234	8046	6214	6480	3876	2393	7730	6638
firstTileUTR_01380	7405	11157	9420	9156	9635	9101	3203	4838	4447	4148	3379	4022			6254	5454	5255	4711	7213	2474	6624	6924	5953	5864	3419	2084	6976	5991
firstTileUTR_01381	1892	3163	3426	1627	2197	2238	1040	1207	1018	834	1105	1115			4255	2964	5538	1990	3527	855	4318	4476	3231	3449	2823	1582	5165	4673
firstTileUTR_01382	2347	3758	2549	2139	3008	1925	1388	1295	1177	1281	1093	1329			3361	5319	5147	3940	5728	1779	5568	5539	4571	4928	2964	1627	5711	5081
firstTileUTR_01383	7276	14569	11041	9705	8379	8664	4456	5777	4373	4602	3861	4300			6155	8349	4861	4715	5931	2977	7159	6893	5852	6152	3249	2069	6752	5738
firstTileUTR_01384	9095	15080	13342	12165	11374	10694	5069	4661	4815	5537	4496	4896			5575	5981	5024	5557	6386	2265	6145	6364	7279	6565	3509	2233	6904	5853
firstTileUTR_01385	0	0	0	0	0	0	0	0	0	0	0	1			0	0	0	0	0	0	16	0	0	0	5	1	11	3
firstTileUTR_01386	0	0	0	0	0	0	0	0	0	0	1	2			0	0	0	0	0	0	0	0	0	0	1	2	3	0
firstTileUTR_01388	0	0	0	0	0	0	0	0	0	0	0	0			0	0	0	0	0	0	0	0	0	0	2	0	3	4
firstTileUTR_01389	954	1094	1307	1102	546	1249	352	369	377	488	356	382			932	716	779	593	1223	606	1220	1324	935	1019	910	477	1604	1418
firstTileUTR_01390	679	1436	969	997	949	670	820	354	465	609	449	533			1454	1196	906	534	1613	281	1657	1973	1404	1407	1146	661	2033	1667
firstTileUTR_01391	1157	2227	1656	1227	2047	1808	731	907	855	690	727	796			2346	2651	1748	2368	3724	734	2715	3185	2923	2990	1910	1197	4226	3168
firstTileUTR_01392	1088	1782	1289	1303	1646	730	471	541	418	518	569	679			2591	1542	1319	2232	2190	310	1713	1743	1844	2290	1341	840	2710	2455
firstTileUTR_01393	7259	13474	11066	9485	9646	8172	4592	5420	4452	4000	4023	4607			10964	9052	8592	8723	11964	3296	11176	12229	10150	10096	6209	3834	12226	10822
firstTileUTR_01394	7141	12062	10688	8673	8567	8796	4166	4691	4830	4626	3831	4548			10080	9026	10355	7572	11483	2280	11420	11699	10246	9831	6000	3700	12170	10587
firstTileUTR_01397	5541	10665	10085	8379	6490	6500	3964	5363	3524	3472	3440	3938			9863	9616	9192	4910	10687	2178	11591	11431	9747	9504	6729	3677	13323	11837
firstTileUTR_01398	6323	9752	8065	6306	7947	5178	4274	3521	3277	3643	3008	3329			8016	8591	9069	7049	10442	2729	10849	11001	9494	9795	5664	3204	11409	9698
firstTileUTR_01399	4918	8226	9461	5426	7290	5264	3220	3537	2710	3091	2752	3004			6323	7027	6599	5593	9367	2324	8350	8804	7915	7794	5058	2868	10511	9179
firstTileUTR_01400	5199	7965	5782	5373	5766	4842	2738	2718	2554	2858	2080	2305			7310	6298	5828	5995	6580	2930	7831	7805	6834	6767	3955	2029	7724	6608
firstTileUTR_01401	11	0	0	0	84	0	0	0	0	0	9	14			58	0	0	0	13	0	8	0	0	0	12	14	30	24
firstTileUTR_01402	0	0	0	0	174	0	0	24	1	0	3	8			0	152	0	0	78	0	49	11	10	11	9	5	8	18
firstTileUTR_01403	2269	4142	2813	3858	2398	2644	1394	1388	1219	1118	1259	1382			3704	3264	3049	3401	3948	1073	4340	4061	3722	3516	2399	1348	4430	3776
firstTileUTR_01404	1797	2953	2545	1584	1611	2553	1089	1225	904	1118	781	1004			2304	3124	2664	2381	3149	569	3420	3495	2354	2557	1522	973	3045	2561
firstTileUTR_01405	1046	2905	2375	1443	2922	2137	928	1425	881	1077	844	919			2987	3590	1713	2673	3852	941	3216	3658	2773	2809	1817	1060	3282	2827
firstTileUTR_01406	1731	2967	2218	1891	3008	2193	1111	1076	1142	1117	880	1046			2097	2542	2822	1603	3322	1081	3693	3584	2995	3141	1678	1061	2959	2702
firstTileUTR_01407	1079	2479	2259	2013	1369	1912	926	767	877	974	943	1082			1847	1325	1427	832	1821	431	1791	1837	1616	1566	1202	712	2276	1954
firstTileUTR_01408	1875	4000	4127	3330	3707	3595	1539	1279	1422	1571	1339	1488			3604	4153	4368	3013	4442	1039	3677	3934	3852	3898	2412	1444	4946	4359
firstTileUTR_01409	3173	4648	6226	3480	4279	3530	2027	1564	1818	1934	1762	1985			2983	2689	1972	2520	3224	489	3093	2979	2239	2205	1899	1052	4261	3336
firstTileUTR_01410	1586	3499	3365	2356	2078	2484	1049	884	1150	1178	1173	1168			1509	1554	1169	1286	1448	436	1954	1920	1305	1398	1168	641	2565	2106
firstTileUTR_01411	1857	3582	3614	2570	2402	3105	1077	1254	1162	1700	1136	1234			3219	3498	2962	1663	3446	1232	4003	3794	3103	3299	2180	1249	4011	3398
firstTileUTR_01412	1110	2063	2441	1776	1791	1265	1019	751	727	975	921	1033			2475	2071	2902	1486	2091	772	2369	2475	1599	1610	1684	991	3174	2789
firstTileUTR_01413	2743	5135	5225	3547	3767	3105	1722	2013	1355	1369	1473	1670			4427	3802	4119	3991	4816	1516	5025	5428	4019	3774	2905	1656	4966	4621
firstTileUTR_01414	2735	3975	3946	2728	3991	3445	869	1615	1706	1729	1459	1665			3981	4102	2903	2858	4922	1721	4675	4539	3643	3799	2922	1636	5237	4454
firstTileUTR_01415	3910	4973	6963	4559	3962	4459	1975	2425	2068	2726	1801	2102			6169	6516	6233	4384	6223	2139	7097	7162	5680	5511	3908	2113	6994	5848
firstTileUTR_01416	1839	2314	2078	3327	2378	1212	1307	1138	1300	1165	1046	1142			872	1021	823	631	1216	249	1043	1411	1239	1270	738	436	1375	1137
firstTileUTR_01417	2013	3085	2995	2150	3095	1447	1085	940	765	989	906	1047			741	807	1417	851	980	49	1004	1145	1126	994	633	394	1144	1039
firstTileUTR_01418	388	893	484	585	520	399	221	581	238	473	319	364			862	399	421	442	807	207	1000	997	657	749	571	321	1089	892
firstTileUTR_01419	1038	1399	870	853	1192	802	384	326	436	478	381	416			1006	1139	1682	964	1777	534	1563	1574	1197	1137	655	380	1264	1055
firstTileUTR_01420	5285	8880	9421	6947	8323	7530	3322	4259	3917	3639	3672	3951			10037	9529	8097	7302	11055	2842	10214	11061	9765	9250	6876	3930	13318	11562
firstTileUTR_01421	5248	10231	9879	7698	7707	5459	3240	4448	3248	3516	3163	3659			8209	9549	8536	7511	11155	2235	11072	11243	9454	9417	6528	3460	12124	10315
firstTileUTR_01422	12492	19050	19993	15105	14960	14980	7112	7638	6777	7766	6855	8119			13365	13909	14828	12553	18443	3851	18725	19348	15510	14680	11088	6525	20099	17246
firstTileUTR_01423	16062	24912	23932	17462	20982	15957	8423	8803	8262	9081	7920	9028			16802	16481	13847	11968	18920	5215	18786	19377	15761	15663	11588	6655	21639	18743
firstTileUTR_01424	0	0	0	0	0	0	0	0	0	0	3	4			0	0	0	0	0	0	0	0	0	0	3	3	3	13
firstTileUTR_01425	6126	12170	9864	9898	7952	7684	4020	4361	4187	3870	3207	3778			2750	3390	1917	2988	4159	1059	3755	3905	4051	4156	2400	1559	4712	4188
firstTileUTR_01426	28	59	198	215	137	64	67	79	41	34	39	35			203	1	65	29	31	0	57	63	30	56	25	14	44	48
firstTileUTR_01427	6029	10984	9114	8159	9397	7476	4061	4004	3693	4158	3901	4316			5142	3158	3407	3814	3714	1401	4445	4403	4431	4196	2805	1950	5642	4620
firstTileUTR_01428	151	289	433	304	228	139	162	87	51	140	160	138			253	740	658	394	418	194	658	632	475	464	361	212	621	466
firstTileUTR_01429	303	892	220	89	498	294	138	170	239	243	130	149			496	785	367	532	575	147	849	836	599	586	349	175	627	579
firstTileUTR_01430	6488	11190	10833	8786	7436	8761	3666	4538	3765	4671	3405	3888			5243	3408	3147	2832	3471	1259	3574	3904	4626	4588	2566	1725	4915	4116
firstTileUTR_01431	3392	4049	3423	2164	3955	3036	1519	1193	1371	1466	1446	1662			1338	2006	1445	711	1961	630	1395	1533	1685	1897	1093	789	2165	1848
firstTileUTR_01432	7252	11187	13563	8131	9722	8543	3687	4470	3900	3232	4143	4465			4362	3628	3676	3087	4619	1454	4228	4011	4385	4824	2997	1935	5275	4556
firstTileUTR_01433	2151	4726	3533	2916	3113	3185	1556	1662	1454	1170	1315	1538			1829	1819	1344	1333	1543	640	1438	1385	1559	1539	1025	722	1937	1647
firstTileUTR_01434	1681	2315	1961	1610	1893	2251	684	588	927	695	706	798			6001	7173	5986	4971	8094	2008	7548	7335	6008	5860	4002	2264	7630	6437
firstTileUTR_01435	1109	1085	808	744	1080	825	401	427	372	378	463	467			2526	2642	2143	1763	2840	720	2699	2556	1956	1817	2714	1392	4881	4139
firstTileUTR_01436	0	0	14	86	0	0	2	6	0	10	1	9			0	0	0	0	27	76	8	13	7	11	15	10	17	17
firstTileUTR_01437	0	0	0	0	0	0	0	0	0	0	4	4			0	0	0	0	0	0	0	0	0	0	5	5	8	9
firstTileUTR_01438	1153	1426	1785	1103	801	638	328	777	304	336	560	686			2799	1916	2239	1411	2073	674	2192	2540	1464	1632	1487	887	3365	2587
firstTileUTR_01439	1640	5059	3987	3099	2867	1975	1773	1730	1104	1269	1371	1477			4752	4365	4417	3046	5529	1112	5647	5626	4345	4399	3436	1797	6793	5838
firstTileUTR_01440	817	695	806	760	680	406	500	292	416	261	248	249			1898	761	1100	739	1247	678	1309	1412	1189	1068	612	305	1329	1010
firstTileUTR_01441	843	1946	1634	1960	769	1488	670	482	484	598	564	559			1364	1336	1751	2167	1705	449	1630	1701	1188	1314	1171	683	2409	2010
firstTileUTR_01442	1254	1692	2047	1743	1420	1549	800	696	697	410	588	662			2275	1724	2004	1141	2262	437	2135	2098	1372	1374	1115	624	2302	1946
firstTileUTR_01444	0	0	26	0	0	0	0	0	0	0	2	3			0	0	0	0	0	0	0	0	0	0	4	1	6	3
firstTileUTR_01447	1373	2322	2344	2616	1802	2120	1114	892	774	1202	909	985			1172	669	1183	618	1052	1029	1119	1281	1172	1250	696	432	1180	1146
firstTileUTR_01448	1768	3168	3564	1895	2154	2785	1417	1562	1530	1495	1135	1229			1690	1512	1089	1555	1282	597	1607	1851	1844	1832	951	530	1673	1380
firstTileUTR_01449	640	1097	1347	1055	1204	894	527	857	267	551	414	398			496	646	737	922	820	223	839	844	915	757	410	266	767	723
firstTileUTR_01450	700	1044	943	585	1035	1064	478	457	241	371	405	497			914	596	676	766	822	547	812	805	576	631	487	371	916	892
firstTileUTR_01451	9175	14380	13908	10450	10638	10559	5648	5707	4897	5382	4724	4909			2108	2464	1407	2818	3404	1812	3362	3493	4679	4511	2172	1870	4419	3835
firstTileUTR_01452	7672	12687	13578	8791	10486	10560	4858	5869	4919	4720	4416	4672			4217	1982	1243	1395	2839	1173	3167	3159	4318	4229	1849	1528	3699	3106
firstTileUTR_01453	8561	13684	14464	11030	11428	11383	4975	6828	4592	4715	4555	4570			3299	2057	1871	3724	3123	1275	3446	3455	4166	4152	2139	1564	4029	3443
firstTileUTR_01454	10369	16825	15163	11911	12555	11887	6221	6776	5587	4742	5388	5770			4554	3437	2909	1506	3711	1741	3634	3899	4554	4531	2145	1597	4319	3728
firstTileUTR_01455	973	1353	1376	1035	1948	664	478	641	451	534	436	491			1309	1250	612	653	1468	191	1131	1083	1102	1160	617	368	1119	969
firstTileUTR_01456	1192	1623	889	1108	1685	873	694	757	558	448	672	751			1268	867	1031	400	1685	83	1643	1658	1409	1521	988	594	1995	1678
firstTileUTR_01457	126	379	169	347	162	136	94	112	37	90	90	74			87	176	27	215	188	0	289	291	270	273	152	86	329	281
firstTileUTR_01458	100	747	636	159	617	547	123	146	294	68	77	91			220	230	237	79	521	30	324	460	256	309	140	78	306	303
firstTileUTR_01459	940	876	1285	746	724	653	287	321	267	165	297	330			324	384	477	623	434	96	458	488	381	451	351	211	602	498
firstTileUTR_01460	978	1352	1691	1302	1104	1219	257	306	548	585	435	475			626	412	911	554	388	231	759	706	646	627	462	265	798	720
firstTileUTR_01461	4933	7559	7152	5481	5696	4254	2745	2844	2886	2541	2398	2712			4573	2332	1964	2702	3779	1715	3740	3375	3930	4241	2036	1372	3828	3171
firstTileUTR_01462	1398	1941	2325	2459	2050	1463	732	903	1151	1084	850	904			1348	1158	1080	426	1176	251	1179	1147	1243	1118	628	447	1188	1012
firstTileUTR_01463	1493	2564	1867	2004	1925	1403	752	797	790	634	655	711			578	1297	209	654	980	314	1057	1045	873	948	540	368	951	807
firstTileUTR_01464	1747	2726	1835	2305	1963	1479	1212	866	674	895	820	886			1094	484	626	860	1144	465	833	727	1002	1100	578	414	949	962
firstTileUTR_01465	123	246	241	264	98	25	115	186	95	187	123	113			366	35	226	135	104	28	117	177	98	103	89	46	171	154
firstTileUTR_01466	181	232	567	686	462	62	160	85	42	154	91	134			79	213	129	0	290	51	133	235	136	160	83	49	162	109
firstTileUTR_01467	58	191	56	0	109	29	60	6	75	62	14	14			3	0	175	0	54	128	75	63	63	27	25	13	33	35
firstTileUTR_01468	45	0	0	39	0	82	9	13	0	15	18	14			85	0	0	0	0	0	21	31	6	21	17	11	35	21
firstTileUTR_01469	0	0	0	0	0	0	0	0	0	0	0	3			0	0	0	0	0	0	0	0	0	0	1	1	8	4
firstTileUTR_01470	0	0	0	0	0	0	0	0	0	0	1	1			0	0	0	0	0	0	0	0	0	0	4	5	2	5
firstTileUTR_01471	4613	8130	6916	6555	5846	5561	2193	2978	2101	2869	2512	2813			5942	6159	5559	5153	7925	2584	7348	7849	7587	7332	4146	2640	8622	7033
firstTileUTR_01472	7178	9553	11484	7015	8097	8284	4279	4654	3126	3909	3289	3713			9518	9483	8549	8735	11260	3299	10990	10974	10480	10343	5759	3595	12041	9961
firstTileUTR_01473	4759	6253	8066	5054	7366	5121	3066	3153	2531	2854	2501	2761			6023	4946	5563	5125	8039	2113	7893	8780	6930	6399	4553	2703	9396	7902
firstTileUTR_01474	5314	8406	6836	5310	6057	6551	2805	2768	2666	3027	2581	2869			6876	7610	6017	5814	8526	2303	7945	8113	7680	7775	4737	2794	9611	7914
firstTileUTR_01475	6180	9929	11096	7026	7357	7254	3953	3517	3383	3828	3614	3917			9206	10639	8396	7084	11520	3068	11783	12323	10826	10958	7096	4268	14524	12168
firstTileUTR_01478	1964	2443	3833	2280	2530	1982	1346	1233	723	809	858	1078			1891	962	1451	1859	1585	556	1466	1614	1416	1368	753	508	1521	1324
firstTileUTR_01479	2283	4580	3975	2756	3857	3013	1564	2323	1927	1864	1351	1535			1782	1584	1546	1397	2280	525	2212	2237	2326	2271	1266	784	2498	2050
firstTileUTR_01480	1803	2771	2376	2451	2191	1413	837	970	605	665	889	920			1419	1313	735	1063	1122	480	1516	1404	1205	1217	675	458	1302	1103
firstTileUTR_01481	1726	3851	2441	1624	1853	1766	762	997	1036	613	793	881			1605	1185	910	1428	1221	705	1300	1283	1383	1376	689	483	1318	1110
firstTileUTR_01482	19	0	0	105	0	162	32	5	60	0	17	21			0	1	0	97	0	0	10	25	56	92	15	10	50	29
firstTileUTR_01483	0	29	0	0	152	256	7	0	0	23	36	48			0	0	0	87	58	43	29	62	70	44	23	27	64	34
firstTileUTR_01484	3543	4962	4721	3609	2589	2808	1693	1753	2095	1768	1666	1739			3012	2301	1743	2663	2700	1400	3117	3320	2642	2581	1972	1231	4417	3708
firstTileUTR_01485	3140	5898	4420	2566	4336	3453	1992	2165	1509	1619	1603	1799			2514	2966	2926	1910	4007	920	3302	3592	2740	2612	1953	1181	4267	3263
firstTileUTR_01486	96	420	577	49	153	169	21	49	81	99	61	88			159	284	580	0	315	133	263	237	169	207	200	110	349	272
firstTileUTR_01487	135	44	110	187	96	76	85	112	106	143	60	45			415	134	99	68	185	0	88	187	222	149	146	74	255	211
firstTileUTR_01488	1670	3443	3890	1703	2256	1908	1134	1369	1163	1186	1177	1314			7419	6572	9809	5573	8993	2569	10055	10628	8534	8662	6807	3977	13206	11510
firstTileUTR_01489	2359	3213	3952	3573	3222	3030	1331	1935	1084	1373	1161	1288			7262	7461	8562	6051	8597	2620	10746	11726	7617	7596	5438	3096	10566	9194
firstTileUTR_01492	0	0	0	0	0	0	0	0	0	0	5	0			0	0	0	11	0	0	0	0	0	0	7	2	1	5
firstTileUTR_01496	17821	29917	27173	19775	23355	18253	10905	11600	9930	10047	8961	9841			16535	16385	18975	13790	20669	4554	19724	20458	17460	16322	11052	6970	22202	19373
firstTileUTR_01497	13373	20456	19838	16367	16573	16709	8495	8318	6559	8013	8049	8655			13888	12503	11512	9381	15180	4563	16120	16481	13642	13596	9590	5934	19256	15924
firstTileUTR_01498	17171	27277	27334	20591	23045	20115	10862	10853	9289	10003	9054	9471			19529	17682	15196	16466	20331	6327	21114	22381	18104	18177	10939	6800	21235	18574
firstTileUTR_01499	15868	30735	29229	20179	21633	19206	10025	11839	9774	9087	9190	9816			16233	15788	14072	12913	18467	5380	21144	21537	17007	17388	11254	6826	21868	18813
firstTileUTR_01500	9255	17845	16018	12505	13827	12838	5925	6119	5245	6686	5709	6253			12185	9882	9169	8992	13298	3835	12399	13068	12159	11715	8379	4649	16417	14079
firstTileUTR_01501	9489	13320	13156	9908	10300	9822	5453	5445	5222	5443	4670	5207			9380	8736	7705	8927	10290	3246	11228	11542	10103	10371	6801	3827	13635	11266
firstTileUTR_01502	10492	17801	16307	12607	13607	14711	5853	7496	5705	5550	5531	6164			11785	9921	10890	8271	12968	3242	13828	14445	12047	11218	8155	4521	15726	13610
firstTileUTR_01503	7921	13898	14677	10309	11238	11323	5294	6337	4645	5354	4621	5529			9726	7966	9270	6306	10767	3202	11961	12341	9566	9867	6779	3790	13400	11089
firstTileUTR_01504	8586	13208	13761	8523	10786	10941	4714	4802	5180	4800	4824	5079			9229	8361	9218	7085	11505	3364	11192	11440	9409	9092	6759	3732	12904	11134
firstTileUTR_01505	10806	21105	19386	13548	16657	14715	6806	6819	6424	6799	5875	6517			11122	12141	11283	11143	14889	4380	15879	16935	13475	13103	8540	4790	16834	14348
firstTileUTR_01506	9449	15288	12805	10832	11561	10656	5500	5366	4653	6009	4490	5071			10079	9997	6830	6423	10454	3410	11619	12237	9982	9813	6498	3614	12410	10948
firstTileUTR_01507	12	0	38	71	24	68	0	0	28	25	15	4			0	19	0	0	4	0	7	0	45	4	5	3	12	11
firstTileUTR_01508	26	0	0	0	96	0	0	0	28	0	11	6			0	18	0	0	42	0	3	5	5	1	7	2	11	12
firstTileUTR_01509	0	0	0	0	0	0	0	0	0	0	2	2			0	0	0	0	0	0	3	0	0	0	0	1	3	1
firstTileUTR_01510	90	23	17	65	129	0	22	17	31	0	8	10			0	25	126	0	73	0	24	25	14	8	7	3	9	16
firstTileUTR_01511	0	0	0	0	0	0	0	0	0	5	4	7			0	0	0	0	0	0	0	0	0	5	8	5	6	8
firstTileUTR_01514	1062	2024	1384	1369	1340	1396	492	584	356	503	470	536			593	756	860	805	1370	574	1120	1027	1064	963	495	295	996	799
firstTileUTR_01515	585	1393	642	1101	1034	798	320	502	517	418	496	606			891	1093	886	245	1225	682	941	1140	1232	1158	859	497	1712	1600
firstTileUTR_01516	1406	2928	2837	1880	2268	1619	1068	1477	1085	1075	976	1025			2239	2320	2632	3080	2735	632	3354	3653	2690	2707	1769	1022	3424	2880
firstTileUTR_01517	1776	3624	2378	2414	2567	2359	741	770	749	1173	840	1027			2065	2460	2195	1818	2997	1249	2719	2720	2763	2681	1454	840	2773	2219
firstTileUTR_01518	1541	3433	2206	2618	2654	2331	900	849	1044	1052	872	942			3403	2934	2618	2851	3938	1194	3516	3588	2835	2875	1977	1188	3820	3189
firstTileUTR_01519	2101	3953	3314	2450	1953	2475	1207	1018	1028	1193	1009	1143			2760	2909	3596	1896	2950	950	3364	3353	2942	3038	1906	1136	3917	3328
firstTileUTR_01520	161	671	919	269	341	509	130	67	123	221	225	273			137	299	34	2	219	28	131	144	147	173	173	84	400	378
firstTileUTR_01521	359	471	636	478	522	215	224	192	380	94	176	196			299	308	243	0	264	51	179	187	191	195	104	66	266	286
firstTileUTR_01522	533	768	549	520	684	528	494	446	322	611	279	283			419	231	190	122	331	52	289	294	305	296	207	91	387	365
firstTileUTR_01523	261	662	385	209	261	742	141	174	245	384	166	197			77	206	127	117	206	17	148	230	229	209	125	67	213	182
firstTileUTR_01524	117	673	451	214	558	205	72	127	179	209	150	157			22	233	51	238	261	0	148	171	238	174	121	67	240	250
firstTileUTR_01525	0	25	97	0	0	17	24	13	35	33	42	25			0	0	0	0	91	73	44	47	22	25	23	18	67	52
firstTileUTR_01526	0	95	0	128	32	87	0	0	0	14	5	16			0	59	1	0	53	0	51	33	4	8	11	5	36	31
firstTileUTR_01527	411	1058	749	865	744	854	397	311	179	204	225	240			582	789	631	497	647	399	871	828	613	596	295	133	564	444
firstTileUTR_01528	632	1499	1190	481	1138	756	376	609	321	273	237	308			392	620	748	818	662	254	721	816	689	667	296	139	591	534
firstTileUTR_01529	106	137	196	0	85	159	51	0	10	21	11	24			248	226	191	150	194	0	64	74	78	52	40	40	135	88
firstTileUTR_01530	0	27	0	0	0	0	0	0	0	0	27	16			0	117	0	0	14	0	3	13	20	7	18	16	87	44
firstTileUTR_01531	2781	5443	4725	3457	4582	4250	1379	1936	1774	1882	1811	2083			4677	4234	2370	2008	4272	1354	4245	4055	3662	3690	3015	1804	5807	4956
firstTileUTR_01532	2862	5797	4577	3985	3738	3257	1477	1468	1844	2089	1834	2005			3306	3498	3248	2357	4055	1321	4269	4155	3724	3882	2948	1802	5314	4605
firstTileUTR_01533	900	2024	1704	1550	1205	1480	779	1087	712	509	575	725			1603	1564	1796	1173	1425	317	1998	2234	1504	1521	1060	625	1820	1626
firstTileUTR_01534	872	1179	1117	872	1139	1008	265	489	265	338	459	498			1831	964	1262	1123	1097	221	1033	1142	984	1082	836	456	1537	1320
firstTileUTR_01535	6177	11066	9533	7245	8036	6392	3158	4129	3149	3251	3162	3384			7351	7214	8489	4865	10200	2835	9394	10028	7900	7766	4696	3042	10889	9090
firstTileUTR_01536	6817	13542	10683	8843	9180	10163	4952	5033	3523	4448	3894	4405			10037	10110	10265	6397	12996	3370	12013	11927	10805	10058	6077	3701	13673	11663
firstTileUTR_01537	6483	10945	10732	8082	9358	7922	3810	4751	3391	3929	3944	4334			9902	9372	9463	7587	11459	2968	11161	11667	9721	9720	6270	3815	13572	11683
firstTileUTR_01538	7119	11488	12107	9670	7431	7277	4100	3969	3390	4065	3888	4048			10269	8895	8741	7751	10624	3253	11458	11493	9232	8893	6031	3706	13717	11818
firstTileUTR_01539	7720	15063	13475	11512	11700	10302	5114	5999	5342	5608	4448	5242			10138	11043	10235	8818	12660	3272	12418	12875	10820	10661	6392	4186	12982	11254
firstTileUTR_01540	7292	13453	12377	9004	10172	8269	4179	4232	3523	4004	3923	4734			5615	5756	5858	4600	7318	1566	6573	7022	6442	6338	4202	2579	8722	7653
firstTileUTR_01541	3116	6016	5067	3591	4251	3921	2340	1823	1682	1966	1650	2098			4518	5305	4409	4866	6103	1920	6224	6052	5276	5156	2947	1905	6420	5852
firstTileUTR_01542	4171	5321	5681	4880	4074	5965	1633	2116	2030	1976	1751	2138			6734	5249	5332	4161	6147	1950	6333	6549	5774	5586	3051	2008	6869	6065
firstTileUTR_01543	0	0	0	0	0	0	0	0	0	0	0	2			0	0	0	0	0	0	0	0	0	0	0	0	1	4
firstTileUTR_01544	0	0	0	0	0	0	0	0	0	0	0	2			0	0	0	0	0	0	0	0	0	0	0	1	1	6
firstTileUTR_01545	0	28	65	0	66	0	0	0	0	0	9	4			82	0	62	0	54	0	0	9	0	0	3	0	6	2
firstTileUTR_01546	0	49	73	0	50	0	33	0	0	0	4	8			0	16	0	0	0	0	8	22	26	14	1	1	4	7
firstTileUTR_01547	402	1136	513	620	654	323	367	204	229	288	264	299			394	385	285	162	316	312	331	257	449	506	238	159	371	323
firstTileUTR_01548	706	1147	857	871	897	1105	277	536	262	573	351	336			694	505	582	477	693	206	670	804	632	621	400	221	635	544
firstTileUTR_01549	1597	2534	2285	2487	1827	1531	1228	1076	793	1326	962	1100			1945	1315	1350	1849	1594	404	1786	1805	1642	1683	903	613	1731	1505
firstTileUTR_01550	1689	2920	3016	2401	1840	1889	910	1149	739	841	998	1128			2414	2213	1394	1541	2013	773	1645	1717	1889	1832	915	672	2029	1764
firstTileUTR_01551	1813	3389	3020	2083	2021	2339	1302	1146	813	1291	1274	1398			1916	1615	1039	1030	1257	851	1680	1654	1414	1489	1267	719	2508	2174
firstTileUTR_01552	2387	5295	4075	2546	4035	2958	1581	1701	1133	1331	1269	1399			2133	2595	2490	3269	3006	739	3608	3581	2323	2474	1777	929	3389	2612
firstTileUTR_01553	2014	3240	3706	2881	3677	2559	1099	1758	833	1062	1225	1408			1185	1324	1237	1393	1981	624	1979	1969	1691	1768	1087	656	2152	1815
firstTileUTR_01554	2080	4094	4436	2465	3664	2644	1613	1526	1508	1789	1491	1474			1844	2238	1870	973	2789	814	2526	2530	2322	2585	1681	887	3181	2537
firstTileUTR_01555	3655	5187	3937	3224	4487	3228	1681	1896	1730	2008	1728	1814			3314	3562	2646	3344	3486	685	3257	3335	2972	3083	2248	1225	4289	3551
firstTileUTR_01556	2525	4402	3760	2917	3061	1926	1531	2008	1719	2060	1530	1614			1989	2954	2771	1758	3481	859	3385	3565	2969	3050	2239	1208	4150	3510
firstTileUTR_01557	4415	8131	7083	6095	6548	5869	2988	2659	2611	2925	2365	2582			9269	10559	7425	9012	10697	2769	10652	11789	9666	9736	6342	3567	14564	13210
firstTileUTR_01558	3721	6509	7013	4251	4678	4138	2094	2658	1849	2092	2086	2264			9401	7286	6153	3934	6652	1500	7096	7643	6398	6390	4212	2509	10059	8516
firstTileUTR_01559	188	536	504	483	368	373	155	132	218	193	146	144			238	127	447	325	255	43	258	248	253	247	132	72	203	194
firstTileUTR_01560	625	1504	808	720	842	1497	439	511	254	426	273	307			601	555	797	445	428	194	536	540	594	621	257	153	581	470
firstTileUTR_01561	372	589	615	435	546	789	164	168	349	182	181	195			254	266	626	698	286	26	454	357	298	278	161	83	319	273
firstTileUTR_01562	229	986	452	508	309	404	341	41	147	167	238	319			391	158	302	349	288	105	157	210	201	247	224	135	449	436
firstTileUTR_01563	407	1164	543	515	554	204	251	355	279	347	225	236			420	276	237	154	357	0	414	416	322	305	216	156	510	411
firstTileUTR_01564	15446	22216	23888	19382	17446	17739	7785	9537	8187	9225	7431	8532			10470	8892	9197	8747	11036	2792	11343	11910	11710	11360	6679	4031	13502	11681
firstTileUTR_01565	13400	25152	23093	16446	19777	17489	7541	9842	7847	9358	8234	9134			9665	9466	10231	7629	12629	3788	12081	12108	11179	10949	7332	4593	14894	12516
firstTileUTR_01566	11105	19652	20325	15145	16654	13419	6232	8020	6348	6144	5889	6946			7873	7656	7621	7144	10231	2374	10087	10764	9466	9558	5818	3374	11736	10056
firstTileUTR_01567	12247	21869	22255	16028	19759	16374	7347	8878	7671	8173	7314	8173			10271	9793	9695	7725	12261	3381	11875	12314	10544	11090	7179	4237	14083	12534
firstTileUTR_01568	1110	1264	1041	1473	1070	1260	316	443	302	444	404	493			361	400	529	417	718	194	673	601	481	528	314	167	542	537
firstTileUTR_01569	967	2320	2062	828	1622	1109	856	729	388	688	532	618			318	745	394	279	783	119	761	811	596	595	490	226	837	770
firstTileUTR_01570	858	1711	1333	1456	1054	1638	645	371	717	775	684	729			734	681	256	455	852	203	793	1049	690	901	503	252	965	952
firstTileUTR_01571	1147	1298	649	911	1067	721	622	504	365	334	415	526			443	388	365	88	685	210	636	665	399	479	357	179	717	635
firstTileUTR_01572	490	1166	1653	796	894	1218	529	414	487	409	406	475			223	351	258	643	453	133	636	702	442	503	354	184	631	607
firstTileUTR_01573	1174	1925	2050	908	1338	1949	670	782	576	788	531	688			714	554	708	98	831	310	989	1086	716	697	404	215	848	758
firstTileUTR_01574	1437	2292	1672	1506	1735	1508	583	592	654	957	748	887			757	723	714	457	954	279	1087	1234	827	843	649	334	1204	1118
firstTileUTR_01575	240	140	106	400	51	340	42	75	60	98	88	94			0	0	90	40	66	35	52	73	116	105	76	62	184	162
firstTileUTR_01576	108	422	282	305	273	320	167	123	83	53	86	98			55	160	100	158	113	0	171	182	182	147	77	45	199	151
firstTileUTR_01577	8440	15266	15398	10258	11504	9830	5197	6157	4095	5354	4921	5248			5701	3383	2968	3685	5077	2048	4669	4796	5784	5703	3070	2255	5426	4771
firstTileUTR_01578	10596	15694	14747	10813	13570	10574	5873	6752	6607	5760	5727	5982			5104	4075	2895	4006	5646	1986	5277	5656	6763	6865	3536	2614	6501	5512
firstTileUTR_01579	278	453	121	245	490	339	118	168	140	112	63	113			363	141	217	63	243	58	217	212	189	241	114	73	159	160
firstTileUTR_01580	27	52	0	0	75	4	3	0	23	0	16	41			0	0	0	0	10	0	17	13	37	16	25	16	41	54
firstTileUTR_01581	0	0	0	0	0	0	20	0	0	2	3	14			0	0	0	34	0	0	3	0	8	0	13	4	28	35
firstTileUTR_01583	6269	8108	7918	6552	6078	6775	2890	3359	2940	2828	2789	3141			4382	4620	2807	4726	5449	1467	4997	4814	4809	5101	3011	2016	5363	4515
firstTileUTR_01584	4090	6737	6043	4015	4753	4243	2288	2328	2164	2380	2008	2177			3979	3822	2991	3251	3798	1294	4453	4401	4511	4389	2429	1472	4212	3488
firstTileUTR_01585	9305	14285	12282	10159	11457	9132	4557	5956	5325	5246	3980	4704			7774	6486	5987	4517	8399	2646	8147	8784	7264	7280	4272	2837	9124	7631
firstTileUTR_01586	1754	4156	3129	2370	1956	2205	1379	1092	1207	991	1149	1172			2443	1682	1198	1313	2084	617	1998	1850	1649	1638	1174	729	2409	2108
firstTileUTR_01589	11573	18213	18154	12094	13283	12579	5892	5826	6324	6264	5406	6291			9749	10230	8408	7698	11186	3362	12095	12199	10385	10561	6633	3852	13360	11226
firstTileUTR_01590	13074	23779	19361	17836	15637	15744	9036	8303	8314	8058	7014	8103			14649	12565	11533	10978	14189	4690	16213	16588	13802	14011	9008	4776	17141	14634
firstTileUTR_01591	523	1132	838	294	926	634	286	207	418	127	262	298			495	149	375	249	489	217	405	356	453	385	198	115	610	495
firstTileUTR_01592	1009	876	1185	650	785	700	448	394	552	408	264	329			376	417	560	164	443	92	386	493	514	588	218	140	608	547
firstTileUTR_01593	4348	5697	5598	4150	4234	3884	1930	2110	1894	2120	1758	2004			6502	5833	4105	3651	5359	1263	6018	6320	5128	5467	3261	1891	5907	5098
firstTileUTR_01594	3448	5377	5234	4829	5702	4361	1857	2239	2065	2730	2301	2783			5687	3881	5897	3878	6486	1737	6449	6558	6111	5748	3996	2593	7891	6770
firstTileUTR_01595	4306	9915	7937	7847	6823	6133	2556	2962	3285	3912	2271	2522			10504	7122	5622	7784	8843	2277	8648	9040	8011	7922	4366	2489	8008	6859
firstTileUTR_01596	5631	8324	6189	5726	7154	6971	2859	2943	2708	3065	2505	2800			8337	7614	8323	6233	8155	2319	9247	9288	8381	7994	4698	2811	9038	7573
firstTileUTR_01597	1491	3026	1953	2035	2057	1537	850	1145	818	817	849	953			392	737	389	705	777	159	647	670	605	609	451	230	834	640
firstTileUTR_01598	1441	2876	2542	1894	2398	2429	1286	1203	838	1064	817	918			1543	832	894	585	1035	123	959	997	730	892	456	286	921	753
firstTileUTR_01599	2601	5234	4474	3217	4996	3752	1975	1926	1751	2337	1578	1762			2643	2290	2602	1040	2775	1491	2468	2648	2457	2596	1427	779	2543	2212
firstTileUTR_01600	2180	4026	3347	2542	3653	2294	1362	1333	1614	1726	1320	1459			1514	2216	1461	1744	1992	449	2052	1965	1916	1845	1020	665	1913	1778
firstTileUTR_01601	2879	4039	5266	3728	3837	3506	1655	1568	1777	1635	1862	1927			1971	1702	2468	1521	2357	1037	2346	2094	2407	2670	1537	893	2712	2308
firstTileUTR_01602	2984	4394	5280	4091	4205	2401	2174	2052	1608	2137	1733	1856			2242	2334	2016	2067	2562	1001	2791	2576	2387	2601	1475	873	2679	2200
firstTileUTR_01603	16175	26864	24434	20221	22482	18892	8977	10534	9140	11036	8893	10054			25574	28146	27391	22087	34109	8286	30202	31391	27685	27100	19375	11006	38641	32957
firstTileUTR_01604	19755	32710	33581	26757	26581	24753	12830	13643	11712	11979	11485	13196			35032	33516	35369	27381	43914	12648	39448	42323	34120	33502	25654	15061	50081	43126
firstTileUTR_01605	2180	3003	3332	2081	3159	2894	1322	1286	1211	1305	1147	1238			2522	2334	1795	1897	2097	653	2181	2353	1648	1656	1323	794	2513	2370
firstTileUTR_01606	1550	2652	2215	2061	1681	2069	1070	841	595	899	783	828			1140	1556	1638	703	1675	759	1693	1514	1009	1147	827	575	1744	1580
firstTileUTR_01607	751	925	778	325	539	385	249	356	204	179	324	368			561	1023	307	74	589	66	631	748	447	490	623	338	1168	995
firstTileUTR_01608	659	707	1350	1107	767	552	302	363	305	333	405	396			1131	709	1431	878	894	264	909	983	943	923	790	398	1391	1257
firstTileUTR_01609	775	663	1125	655	352	952	238	524	449	365	306	361			613	556	543	324	802	388	978	932	814	876	470	273	1008	909
firstTileUTR_01610	587	1169	1066	1217	563	996	216	656	375	607	406	452			667	993	805	744	860	365	964	1012	810	961	616	405	1306	999
firstTileUTR_01611	1377	2441	2171	1755	1486	1520	913	1034	1004	943	758	819			1042	695	618	358	856	65	807	941	1086	1101	542	411	1038	816
firstTileUTR_01612	1646	2008	1900	1592	2210	1667	979	1066	668	823	779	789			1315	636	685	808	891	361	1062	803	932	1034	513	387	1123	865
firstTileUTR_01613	4445	6765	7301	5018	6747	5933	2736	2991	2508	2837	1936	2242			3319	2669	1550	2021	3031	1024	3086	3364	3093	3203	1469	980	3104	2465
firstTileUTR_01614	5603	7315	6792	5811	5969	5360	2838	2991	2452	3131	2217	2337			3660	2209	2200	1894	2951	712	2893	3054	3276	3128	1396	996	3044	2498
firstTileUTR_01615	2227	3685	4896	2532	3251	3227	1486	1661	1493	1184	1487	1520			3307	2235	2570	2446	2275	971	3234	3280	2338	2362	1557	1035	3181	2612
firstTileUTR_01616	2560	4836	3387	2984	3318	3142	1958	1766	1591	1524	1319	1499			2816	2276	2235	1653	2881	1047	2638	2895	2696	2707	1436	900	2650	2355
firstTileUTR_01617	2738	4713	4882	3496	3728	2896	1510	1548	1517	1493	1214	1317			2869	2642	2393	1398	2890	1072	2815	2824	2308	2559	1289	867	2467	2051
firstTileUTR_01618	2961	5452	4518	3844	4558	3928	2245	2327	1986	2391	1748	2004			3517	2771	2904	3140	4196	1412	4120	4404	3738	3740	1970	1297	3985	3263
firstTileUTR_01619	2780	4094	4842	2956	4129	3214	1651	1827	1461	1543	1795	1890			2714	2697	2397	1620	3480	983	3004	3137	3017	3003	1831	1241	3609	2933
firstTileUTR_01621	0	0	64	0	0	0	0	0	0	0	0	0			0	0	72	0	0	0	17	3	17	0	0	0	0	0
firstTileUTR_01622	0	0	0	0	19	0	0	0	0	0	0	1			159	0	1	0	9	72	0	8	44	11	6	4	3	0
firstTileUTR_01626	171	95	176	508	104	193	27	99	39	19	39	55			610	214	618	461	300	221	419	549	451	436	178	117	480	321
firstTileUTR_01627	221	434	50	0	110	208	63	34	49	157	71	49			412	481	389	372	447	351	431	486	418	448	235	121	455	336
firstTileUTR_01628	3249	5877	4948	5247	3970	3585	1588	1602	1354	2064	1601	1846			3221	3860	2739	2979	4065	627	3563	3479	3393	3213	2021	1283	3975	3320
firstTileUTR_01629	2994	4658	5861	3546	3741	3466	2377	2080	1824	1796	1751	1977			3844	2310	2701	2325	3155	390	3785	3751	2985	3360	1964	1291	4068	3356
firstTileUTR_01630	2488	4303	3992	2298	3218	2813	1594	1374	1029	1891	1568	1689			2097	2209	2151	1657	2677	766	3014	2829	2505	2393	1813	1204	3723	3110
firstTileUTR_01631	3606	6814	5449	4469	4611	4238	1943	2297	2550	2440	2030	2576			2744	4027	3533	2364	4840	1092	4363	4513	4018	4016	2530	1687	5460	4203
firstTileUTR_01632	3580	6384	4328	4417	3781	4488	2122	2275	2084	2605	1876	2199			4322	3419	2217	3497	3646	1243	4396	4403	3864	3633	2128	1417	4430	3616
firstTileUTR_01633	3572	4523	5800	5313	5313	4386	2252	2564	1876	2003	1917	2187			2705	3663	3969	4075	4417	1400	4558	4264	4008	3897	2151	1523	4810	4163
firstTileUTR_01634	3200	5708	5132	3543	4800	3312	1702	1896	1208	1833	1744	1912			3210	3119	2787	1958	2949	1293	2845	3363	3243	3297	1589	1215	3777	3233
firstTileUTR_01635	92	299	411	315	154	226	183	294	196	65	156	180			149	254	346	90	167	170	296	266	220	178	170	113	400	331
firstTileUTR_01636	695	700	960	824	809	903	392	504	418	161	296	306			747	649	453	529	726	162	745	685	494	559	342	200	813	608
firstTileUTR_01637	984	2215	2219	2379	1461	1471	946	915	749	613	722	798			2083	1481	2391	1233	2403	589	1969	2101	1981	1924	1271	737	2542	2085
firstTileUTR_01638	2147	2849	2528	1269	1913	1520	541	925	1118	957	647	756			2974	1470	1776	1329	2260	676	2151	2650	1851	1849	1216	757	2351	1918
firstTileUTR_01639	1619	2550	2563	2128	1603	2073	619	1146	726	1014	954	1010			2356	2488	1800	1529	2222	626	2568	2995	2508	2584	1591	1046	3083	2779
firstTileUTR_01640	1542	1833	2416	1938	2275	1904	736	1337	394	907	878	982			2054	1643	2056	2238	3419	791	2397	2377	2018	2167	1487	941	2889	2583
firstTileUTR_01641	4006	5933	6126	4079	3921	4037	2492	2105	2505	2846	2051	2370			2245	1962	1563	2767	2199	668	2780	2790	2903	2918	1721	1289	3511	2866
firstTileUTR_01642	4510	7948	6951	4130	7415	5849	3028	2823	2210	3448	2547	2741			3916	3223	2368	2789	3107	1111	3506	3461	3512	3406	2097	1433	3959	3419
firstTileUTR_01643	2071	2279	3072	2430	2135	2126	1351	1144	1309	1327	1021	1052			1866	2142	2077	971	2142	455	2125	2107	2239	2231	1611	890	3049	2586
firstTileUTR_01644	1547	2533	2972	1594	1479	1896	845	831	933	1204	752	820			1664	1592	1405	1350	1546	249	2073	2101	1648	1778	1087	635	2414	1867
firstTileUTR_01645	1064	2324	1941	1455	1462	1010	634	824	616	1031	481	601			2308	1324	1478	796	1714	987	1407	1491	1758	1843	739	507	1425	1222
firstTileUTR_01646	1200	1764	2119	1571	1718	1809	615	906	845	528	645	758			1427	989	1635	1104	1641	258	1436	1595	1377	1243	803	571	1764	1376
firstTileUTR_01647	1857	2607	2511	1611	2492	1496	746	981	570	818	770	806			2304	1835	1444	553	2160	534	2221	2157	1653	1624	1219	696	2214	1934
firstTileUTR_01648	1442	1063	971	1768	1325	1270	564	389	336	510	577	744			1553	1299	898	1641	1130	339	1338	1158	1120	1258	863	510	1619	1414
firstTileUTR_01649	954	1825	1550	1490	1316	1650	760	751	599	627	601	713			842	1550	1679	2221	1408	592	1512	1490	1564	1339	911	575	1742	1524
firstTileUTR_01650	1134	2339	1865	1681	2287	1473	477	790	714	368	760	844			1714	1054	1372	1122	1548	546	1460	1534	1281	1340	929	562	1795	1409
firstTileUTR_01651	13185	20467	19579	14311	19839	16178	7401	8777	6636	7692	6631	7617			34745	31764	30533	23843	41060	9926	41693	42675	35266	35228	18882	11905	37173	31972
firstTileUTR_01652	13644	21611	17300	15025	17989	16447	7852	9034	7263	6989	6677	7972			33701	31563	30283	24246	39528	11827	38661	40367	33485	32574	19728	12308	37754	32249
firstTileUTR_01653	14651	26676	23088	19630	18461	19026	7900	9673	8896	9203	8031	9365			36250	34741	35898	26881	40396	12361	41635	43115	38312	37564	22203	14039	42022	35460
firstTileUTR_01654	11204	18460	18199	13750	14564	14775	6659	7143	5783	6788	5927	6983			32340	26862	26606	21187	33149	10128	33604	34720	29868	29144	16518	10705	32389	27942
firstTileUTR_01655	21015	34848	33255	25590	28904	25788	13037	15230	11406	13113	11615	13473			31447	30540	30127	25539	38066	11603	38777	39262	32407	32084	22691	13196	44971	39195
firstTileUTR_01656	22622	35165	34287	25410	26566	22982	12327	13077	11294	12702	11468	12938			29442	30475	25933	27239	34151	11095	35035	36842	30174	29809	22048	12601	43671	37209
firstTileUTR_01657	20191	31323	32027	26291	26580	21996	12014	12957	11817	12189	10977	12272			30489	28280	27153	22771	35568	9498	36899	37641	30979	30430	21547	12313	42722	36269
firstTileUTR_01658	17956	29544	26005	21160	23093	20365	10792	11048	9924	10910	8872	10137			26199	26109	22306	20111	28051	8705	29580	31004	25447	25504	16941	9665	33546	29123
firstTileUTR_01659	236	589	682	874	515	712	212	361	227	374	275	269			643	1116	428	308	1227	220	1298	1387	858	769	655	352	1251	1037
firstTileUTR_01660	365	744	774	447	452	564	236	269	165	193	124	142			699	832	1290	834	972	380	903	971	920	955	397	170	711	660
firstTileUTR_01662	106	116	32	229	109	38	0	111	36	0	56	55			241	231	73	76	51	1	98	159	84	67	85	53	122	146
firstTileUTR_01663	202	472	174	359	472	221	218	165	134	143	121	147			71	724	130	648	789	126	944	1001	863	612	340	190	840	630
firstTileUTR_01664	82	79	134	261	17	32	0	4	138	145	92	90			66	229	205	83	321	62	238	362	247	254	319	161	538	447
firstTileUTR_01665	98	262	162	242	335	93	35	96	73	133	68	58			124	167	127	495	171	23	254	230	282	299	94	76	175	145
firstTileUTR_01666	56	210	0	50	45	0	26	127	40	53	55	65			67	19	0	176	100	36	208	200	112	67	121	68	229	183
firstTileUTR_01667	423	276	551	478	265	263	128	146	233	65	113	130			472	91	183	221	331	41	228	289	356	330	197	94	352	316
firstTileUTR_01668	460	578	791	571	535	138	182	424	147	349	184	208			257	209	956	523	548	91	461	405	464	459	313	184	506	469
firstTileUTR_01671	195	125	288	237	231	190	131	99	94	274	116	135			155	59	574	251	214	113	286	329	304	273	187	144	284	328
firstTileUTR_01672	377	436	741	561	356	499	273	409	163	258	235	232			632	486	701	208	800	313	664	744	460	438	452	261	830	808
firstTileUTR_01673	19261	29889	28845	23775	22529	24449	11233	12370	10669	10706	9678	11127			26576	24463	22938	19466	28518	8068	27194	27780	24359	23566	14422	9256	28093	24473
firstTileUTR_01674	17341	30398	27614	22180	24268	21050	10193	11763	8947	10222	9633	10703			23275	21767	21561	18749	26070	7338	26149	28426	23059	23048	13425	9067	26870	23467
firstTileUTR_01675	29	122	65	125	41	0	14	57	48	96	43	67			0	40	0	167	85	0	111	138	79	70	66	60	104	114
firstTileUTR_01676	58	52	118	127	128	0	76	102	27	56	45	51			0	148	0	4	87	0	48	76	51	73	48	32	91	76
firstTileUTR_01677	68	23	189	282	217	181	65	91	65	36	70	87			226	56	191	84	234	79	132	143	118	153	138	80	287	232
firstTileUTR_01678	66	339	153	56	212	156	56	143	100	35	93	93			213	575	23	177	153	164	184	195	195	210	143	90	327	213
firstTileUTR_01679	190	182	140	178	48	223	0	39	74	0	60	85			75	24	0	115	27	36	88	87	67	47	59	29	123	116
firstTileUTR_01680	6869	10400	9930	7826	9131	5892	4083	4358	3807	4542	3077	3587			11055	10224	9433	7970	11885	4197	12871	14022	12703	12645	5359	3756	14045	11266
firstTileUTR_01681	6793	11275	9228	7661	8706	7980	3846	3904	3922	4312	3320	3847			7032	8147	6565	6547	8222	2222	8326	8719	9052	8406	3973	2890	10231	8426
firstTileUTR_01682	94	267	31	48	229	89	141	52	99	12	113	105			126	0	71	19	84	0	85	114	67	69	128	67	231	191
firstTileUTR_01683	758	1391	1442	1453	766	900	393	742	647	336	351	405			683	685	511	161	526	164	553	569	473	456	341	202	770	650
firstTileUTR_01684	255	406	289	557	307	336	153	138	132	93	154	145			0	115	126	23	204	142	123	186	154	175	137	71	270	273
firstTileUTR_01685	680	1152	801	592	769	302	231	162	270	339	335	332			852	508	169	394	399	257	568	569	474	447	350	196	767	600
firstTileUTR_01691	114	517	767	502	603	423	205	138	99	267	160	198			219	304	212	281	230	298	261	296	279	223	197	119	346	291
firstTileUTR_01692	127	924	253	65	411	305	146	310	76	109	163	180			235	345	191	345	458	0	143	176	218	184	163	89	252	228
firstTileUTR_01693	534	920	266	199	371	419	216	218	146	334	253	253			1493	1305	1027	543	982	159	1198	1292	875	895	790	411	1681	1324
firstTileUTR_01694	108	170	107	85	77	0	96	41	51	26	60	60			92	263	348	256	278	0	351	362	91	163	198	103	366	315
firstTileUTR_01697	2045	3798	3490	2327	2632	2474	1258	1630	1028	1347	1253	1380			2073	1859	2408	869	2458	601	2520	2757	2499	2281	1476	998	3188	2861
firstTileUTR_01698	2984	3990	4273	3462	3117	2383	1482	1599	1429	1259	1468	1613			2350	2668	2430	2466	2511	794	2894	3093	2286	2109	1698	1032	3494	3078
firstTileUTR_01699	1996	3770	3661	2722	2793	2814	1814	1348	1105	1301	1497	1580			2502	2424	1748	1215	2825	761	2752	2680	2374	2336	1952	1105	3969	3353
firstTileUTR_01700	1666	2538	2635	2201	1888	2260	745	1619	1429	1625	1323	1437			1734	1227	1372	692	2135	645	1845	1966	1759	1755	1273	895	3030	2680
firstTileUTR_01701	2096	4017	3305	2246	3005	2574	1395	1380	1452	1221	1128	1207			2848	2009	2124	696	2059	536	3013	3273	2596	2418	1449	877	2986	2594
firstTileUTR_01702	2351	4976	3732	2866	3716	2992	1502	1929	1912	1983	1559	1832			3814	3077	1836	2017	2966	865	3038	3093	2501	2559	1768	1055	3755	3054
firstTileUTR_01703	5091	6197	6782	5416	6204	5611	2706	2911	2795	2824	2893	2957			2983	2081	2197	2763	3117	1292	3162	3604	3179	3435	1811	1446	3672	3238
firstTileUTR_01704	1728	3356	3536	2592	2550	2300	972	1214	1033	1137	1109	1198			622	568	1106	718	1419	482	1275	1151	1578	1303	735	538	1398	1206
firstTileUTR_01705	2114	2729	3213	3724	2815	2109	1137	1641	1413	1487	949	1075			1243	911	1129	1294	1258	388	1527	1505	1640	1360	647	506	1318	1043
firstTileUTR_01706	2469	3188	3599	2015	2350	3006	1168	1405	1293	1317	1054	1164			2232	1108	835	827	1577	476	1578	1458	1746	1751	695	521	1389	1197
firstTileUTR_01707	0	0	0	0	0	0	0	16	0	0	0	2			0	0	0	0	0	0	0	0	0	0	1	2	7	3
firstTileUTR_01708	0	0	0	0	0	0	0	0	0	0	0	0			0	0	0	0	0	0	0	0	0	0	2	0	2	0
firstTileUTR_01709	0	0	0	0	0	0	0	0	0	0	0	6			0	0	0	0	0	0	0	0	0	0	1	0	3	8
firstTileUTR_01710	0	0	0	0	0	0	0	0	0	0	1	2			0	0	0	0	0	0	0	0	0	0	4	2	5	0
firstTileUTR_01711	2078	2267	3349	2279	2428	2431	1362	1063	687	983	977	1084			1685	2277	3033	2471	3148	915	3036	2932	2455	2243	1508	937	3267	2777
firstTileUTR_01712	2600	4167	4697	2727	2847	2474	1296	1703	1121	1389	1249	1354			3603	2979	3150	2519	4294	538	3918	3893	3484	3254	2195	1284	4899	4016
firstTileUTR_01713	2202	3912	2961	2769	3398	2385	990	1198	1119	1687	1186	1169			3832	3948	3605	2561	5108	968	4170	4384	3312	3586	2205	1298	4756	3815
firstTileUTR_01714	1939	4007	3319	2008	3489	3369	1537	1110	1099	1387	1128	1234			2974	3715	3814	1497	4109	847	3807	4427	3301	3374	1860	1129	4065	3335
firstTileUTR_01715	1913	4024	3424	3076	2289	3261	1270	1147	1415	1435	1154	1266			3675	2937	2745	2530	3432	1493	4078	4504	3299	3333	2103	1284	4681	3957
firstTileUTR_01716	2929	5491	4470	3444	3402	4462	1954	2018	1640	1855	1615	1767			5363	5639	5410	3245	6185	1872	7406	7742	6146	6980	3616	2195	7809	6392
firstTileUTR_01717	5766	9461	9309	6953	6915	4956	3163	3729	3377	3747	3213	3517			8497	8700	6150	6357	10186	3511	11131	11251	9430	9229	7576	4041	13456	11122
firstTileUTR_01718	8509	12760	12810	9319	10872	9796	4345	4515	3829	4951	4291	4967			11588	11543	11833	9210	15547	4390	14465	15561	11465	11260	10498	5825	19463	16325
firstTileUTR_01719	1383	3220	2918	1779	1577	2737	1133	1175	967	1030	1051	1078			3112	3298	3382	2259	3304	738	3685	4029	3430	3325	2391	1220	4671	3752
firstTileUTR_01720	1289	2036	2281	1058	1201	1515	974	669	439	733	559	692			2379	1456	1340	1413	1390	514	2049	2393	2237	2269	1297	732	2764	2165
firstTileUTR_01721	1246	2845	2024	1832	2440	2070	857	878	505	864	654	818			2360	2922	2981	1962	3406	659	3419	3367	2522	2494	1742	942	3494	2991
firstTileUTR_01722	623	1387	1726	1698	1459	1252	597	550	612	448	522	481			1477	1663	1746	1558	1694	771	1981	1936	1616	1700	1245	644	2516	2186
firstTileUTR_01725	53	138	0	0	27	0	0	0	0	0	1	3			0	0	153	0	30	0	11	3	14	15	1	1	9	1
firstTileUTR_01726	0	0	0	0	0	0	0	0	0	0	0	2			0	0	0	0	0	0	0	0	0	0	0	0	0	1
firstTileUTR_01727	5939	10090	10169	8958	8519	7999	3562	3541	3855	3578	3494	3746			4436	3251	3815	2689	3986	1409	4190	4192	3409	3423	2551	1462	6522	4841
firstTileUTR_01728	3945	6478	5473	4257	4436	4615	2344	2487	1808	2395	1926	2186			1090	1353	1946	1266	1971	744	2056	2183	1665	1812	1211	675	3099	2439
firstTileUTR_01729	5533	12439	9636	7352	8752	7173	3593	3874	3337	3908	3222	3596			4276	4100	2628	4041	4909	1516	4301	4404	5006	4694	2867	1870	5161	4409
firstTileUTR_01730	5348	9860	8561	5884	7736	6155	4026	3681	3128	4041	2988	3187			3768	3301	3391	2521	4165	1465	4198	4173	5078	4969	2376	1654	4396	3797
firstTileUTR_01731	1794	2492	3335	2483	1936	2338	1428	1146	1340	1366	1111	1299			1086	1424	835	1205	1529	574	1501	1475	1541	1810	953	620	1684	1380
firstTileUTR_01732	3618	6707	6456	3688	4836	3662	2627	3114	1914	2049	2052	2242			2715	2326	1734	1584	2316	876	2630	2900	2780	3178	1426	1057	2739	2200
firstTileUTR_01733	2494	4068	3417	2301	3215	2496	1421	1777	1387	1583	1458	1548			1962	1472	1109	2233	1702	424	1987	1952	1669	1796	1122	796	2243	1788
firstTileUTR_01734	1259	1977	1282	1451	1785	1292	833	708	538	581	535	589			1168	547	514	589	967	428	931	948	718	825	505	333	999	872
firstTileUTR_01735	886	1344	1928	1097	1716	1287	877	747	675	492	542	617			367	772	622	132	768	484	791	835	928	925	588	370	1090	960
firstTileUTR_01736	2368	2575	3004	2199	1965	2584	1079	1176	988	1536	1071	1141			1119	1568	1766	2522	1230	707	1348	1349	1395	1400	1067	614	1981	1598
firstTileUTR_01737	602	838	880	675	891	531	367	321	557	363	341	387			526	547	477	454	622	281	456	645	492	542	325	202	628	566
firstTileUTR_01738	499	930	597	469	724	584	389	234	224	621	229	204			591	351	399	118	493	365	479	548	602	546	241	127	411	362
firstTileUTR_01739	879	638	603	792	554	498	328	155	227	188	303	313			592	193	30	298	698	184	603	501	614	506	322	192	623	521
firstTileUTR_01740	414	531	473	462	424	274	92	347	54	183	215	312			251	256	74	0	422	150	257	336	344	285	267	156	520	428
firstTileUTR_01741	127	404	463	253	375	417	282	164	94	253	257	315			266	141	664	88	212	187	308	290	231	216	318	194	652	537
firstTileUTR_01742	1457	2382	2605	2114	2102	1525	574	1135	755	872	920	1100			2366	2802	1877	1525	2758	540	2290	2434	2328	2113	1684	995	3508	2837
firstTileUTR_01743	3535	5935	6355	4639	4890	4017	2405	2130	2746	2004	2075	2243			5952	5382	5543	4741	6769	1501	6583	6754	6705	6265	4090	2352	7906	6996
firstTileUTR_01744	608	1160	502	816	448	485	501	357	326	403	334	338			682	592	302	495	615	121	868	894	971	1118	483	285	866	769
firstTileUTR_01745	2842	5301	5151	4196	4703	3535	1817	2119	2151	1900	1882	2034			5108	4609	4857	2423	5221	1673	5741	5734	5465	5853	3244	1951	6399	5647
firstTileUTR_01746	0	0	99	62	1	0	0	0	0	0	4	7			0	12	42	0	0	0	3	2	5	6	3	5	11	0
firstTileUTR_01747	0	0	0	0	0	0	0	0	0	0	2	0			0	0	0	0	0	0	0	0	0	0	0	0	0	0
firstTileUTR_01749	1030	1359	928	1413	1088	1668	573	455	592	880	486	578			1253	1699	1399	1199	1367	761	1839	1920	1679	1795	1085	668	2364	1965
firstTileUTR_01751	1223	2094	2303	882	1885	1623	1100	933	477	894	711	865			1612	1779	2715	1442	3178	771	2960	2842	2308	2374	1570	919	3231	2922
firstTileUTR_01752	0	0	0	0	0	0	0	0	0	0	0	2			0	0	0	0	0	0	0	0	0	0	0	0	0	3
firstTileUTR_01754	21946	36010	35147	27913	27044	23842	13681	14136	12908	12997	10930	11998			38266	36265	35826	30486	43505	11889	47775	48783	39678	39624	24450	14233	48716	42081
firstTileUTR_01755	23482	39602	38751	31161	32449	26933	15073	15732	13392	14392	12845	13775			39925	41837	47416	33736	51215	14061	54703	57044	44959	44139	28783	16330	56561	48283
firstTileUTR_01756	5586	7793	8615	6433	5171	6422	3329	3221	2903	3484	3583	3695			16828	15115	16587	10426	18107	5025	19386	19851	15701	15640	13462	7470	28556	22300
firstTileUTR_01757	5050	6723	7303	6384	5000	5413	3205	3301	2530	3004	3266	3410			15400	14138	16067	12163	18912	4503	20875	21982	17403	17148	13823	7514	29297	24085
firstTileUTR_01758	0	0	80	71	47	0	8	0	0	27	50	55			0	5	0	0	0	0	12	19	0	9	18	12	31	30
firstTileUTR_01759	15	129	85	0	54	0	22	34	0	0	14	20			0	1	0	0	10	0	9	0	0	0	3	7	11	9
firstTileUTR_01760	28	0	21	103	0	60	1	0	42	21	20	19			0	0	0	0	15	0	11	4	42	33	11	6	14	7
firstTileUTR_01761	238	631	510	276	71	265	153	43	67	47	121	101			418	92	66	38	16	117	55	31	75	46	39	22	84	47
firstTileUTR_01762	947	1173	1144	610	750	909	552	391	478	523	516	522			1790	1404	1621	1128	2062	375	1755	2079	1490	1411	1339	700	2221	1973
firstTileUTR_01763	881	2111	1799	616	1035	771	537	785	536	392	560	641			1220	2295	1858	1645	2443	280	2433	2486	1819	1880	1669	948	3072	2761
firstTileUTR_01764	473	1508	1423	947	1058	900	374	300	269	326	257	327			629	632	350	851	858	235	946	906	657	634	391	239	831	767
firstTileUTR_01765	920	1132	1253	1201	1454	855	387	660	502	689	384	401			1163	505	1385	1089	1555	384	1080	1235	754	802	486	259	1081	805
firstTileUTR_01766	26	47	119	0	101	57	0	45	0	49	2	11			132	26	76	4	106	0	18	40	20	19	9	3	20	13
firstTileUTR_01767	0	85	0	31	59	0	21	24	0	0	11	7			0	0	20	0	54	82	40	35	0	4	8	4	24	21
firstTileUTR_01768	0	0	0	0	0	0	0	0	0	0	3	0			0	0	0	0	0	0	0	0	0	0	3	2	0	2
firstTileUTR_01769	0	0	0	0	37	0	0	0	0	22	0	6			0	0	0	0	0	0	0	0	8	10	2	1	7	4
firstTileUTR_01770	2795	5504	4065	3516	2849	2854	1404	1623	1620	1199	1394	1528			2519	2477	2537	1541	2532	403	2911	2993	2418	2243	1372	822	2663	2499
firstTileUTR_01771	3393	4552	5571	3855	3558	3080	1827	1667	1859	1584	1531	1871			2761	2191	2510	1966	2813	627	2351	2554	2378	2363	1429	974	3049	2640
firstTileUTR_01772	4022	8705	8350	6102	6029	5409	3436	2958	3013	3445	2778	3189			6932	6718	5208	5593	7848	2671	8666	8843	7309	7421	5225	2960	9723	8725
firstTileUTR_01773	9868	16150	15157	11263	14126	11013	5338	5630	5182	6086	5045	6102			12880	11200	11130	10141	15622	3728	15336	15350	12308	12595	9503	5476	17718	15512
firstTileUTR_01774	2211	4143	3963	3868	3255	2045	1393	1812	1332	1404	1348	1422			1517	2277	1207	1753	2237	538	2613	2634	2680	2614	1512	988	2839	2299
firstTileUTR_01775	2745	3581	3793	3065	2466	2431	1053	1524	1333	1202	1459	1547			1739	2070	2102	1050	2248	1007	2078	2358	2619	2471	1540	1011	2802	2387
firstTileUTR_01776	163	523	550	310	629	305	162	133	193	117	135	183			287	260	494	281	507	198	414	452	469	416	278	170	606	460
firstTileUTR_01777	356	484	704	347	45	273	343	266	130	258	131	179			248	509	561	548	673	72	718	653	525	359	267	189	550	475
firstTileUTR_01778	252	894	769	485	479	508	260	211	278	153	214	173			375	633	534	494	899	120	817	700	619	587	347	171	710	545
firstTileUTR_01779	456	762	331	212	272	437	182	184	176	123	142	171			298	455	204	310	547	425	735	722	475	468	311	153	474	400
firstTileUTR_01780	327	1001	847	628	627	546	277	351	262	245	222	267			439	544	573	62	637	153	646	582	450	421	350	201	684	616
firstTileUTR_01781	486	553	1244	982	820	512	379	422	245	395	217	293			398	848	793	794	1109	135	785	997	726	623	367	231	705	642
firstTileUTR_01782	432	361	623	637	699	725	301	409	272	213	214	256			498	518	944	266	501	352	694	730	560	545	316	203	583	540
firstTileUTR_01783	837	1310	1198	472	690	999	446	530	274	379	344	458			864	847	816	632	593	353	1135	1022	693	683	565	315	980	883
firstTileUTR_01784	2140	3081	2516	2100	2365	2719	991	1407	1179	1113	888	1036			2582	1791	1922	1890	3037	889	2588	3018	2608	2437	1836	1097	3538	2909
firstTileUTR_01785	2459	4361	3578	3934	3445	3523	1510	1499	1063	1463	1397	1536			4008	3559	3077	3585	3870	1173	4307	4027	2883	2882	2625	1561	5049	4259
firstTileUTR_01786	3235	5505	5256	3649	4134	3831	1603	1626	1635	1844	1495	1593			4120	4172	4956	2994	5719	1746	5230	5320	4439	4271	3005	1772	6252	5160
firstTileUTR_01787	1220	3308	2521	2234	1354	1576	762	1181	699	1392	670	850			2150	2263	1670	1232	2412	501	2385	2899	1947	1947	1344	781	2638	2372
firstTileUTR_01788	1324	2833	3120	2810	1585	2424	1297	1086	914	791	1171	1320			2202	2728	2680	2035	2548	528	3002	3219	2289	2301	2206	1358	4385	3923
firstTileUTR_01789	1734	2690	2939	2063	1827	2304	957	1018	760	788	850	965			3147	3003	1321	887	2300	704	2949	2934	2113	2272	1438	929	2917	2300
firstTileUTR_01790	3015	4712	5129	3785	4152	2899	1725	1757	1580	1680	1483	1753			5027	3975	3416	3843	4747	1176	4636	4740	4672	4441	2732	1620	5348	4412
firstTileUTR_01791	897	659	828	356	798	540	269	219	279	481	363	330			560	486	187	422	663	205	698	722	660	494	390	260	832	655
firstTileUTR_01792	739	1672	889	1033	1029	1335	576	582	427	549	450	529			939	575	433	672	739	308	830	731	801	844	471	256	922	847
firstTileUTR_01793	724	1133	1570	596	1042	476	270	499	193	384	487	551			663	1155	427	459	674	117	615	676	752	777	391	236	844	734
firstTileUTR_01794	869	1879	1342	1378	1164	900	481	550	379	537	523	555			616	887	953	582	1173	204	1106	1146	816	814	522	259	1022	803
firstTileUTR_01795	1010	1594	1112	627	1405	911	469	471	463	508	462	493			1053	831	593	613	821	754	919	854	723	765	386	221	736	658
firstTileUTR_01796	0	0	0	48	0	0	0	0	0	0	2	1			0	0	126	0	0	0	5	7	8	4	6	2	17	8
firstTileUTR_01797	0	0	0	0	0	0	0	0	0	0	1	3			0	18	0	0	0	0	3	6	0	0	5	3	7	19
firstTileUTR_01798	4603	7332	5731	5729	5830	3988	2379	2882	2346	2750	2330	2611			5398	4916	5123	3809	6514	1658	5919	5831	4665	4170	3654	2170	7783	6441
firstTileUTR_01799	3867	7563	7036	6003	6065	5577	3113	3019	2261	2908	2732	2967			6651	5958	4378	4544	7912	2284	7539	7993	5892	5490	4695	2608	9662	8112
firstTileUTR_01800	2280	3676	3083	2729	2979	2617	1538	1132	1095	1168	1246	1378			2626	2311	1514	1205	2733	560	2753	2639	2086	2349	1604	1008	3607	2963
firstTileUTR_01801	2358	3648	3990	1462	2748	2963	1243	1730	1406	1309	1417	1545			1927	2259	2328	1188	2699	689	3358	3520	2869	2623	1956	1172	3946	3331
firstTileUTR_01802	2474	4520	4151	3328	3203	3041	1799	1720	1544	1806	1566	1751			3324	2635	2419	1734	2713	868	3234	3418	2767	2726	1948	1224	4179	3596
firstTileUTR_01803	2103	5359	3807	3469	3090	2705	1206	1467	1503	1677	1702	1800			2518	2296	2121	2689	3482	721	2886	3725	3028	2994	2280	1362	4540	3955
firstTileUTR_01804	0	0	0	0	2	0	0	0	0	0	2	7			0	0	0	0	40	0	4	0	5	26	5	4	7	7
firstTileUTR_01805	0	0	0	0	0	0	0	0	0	0	0	2			0	0	0	0	0	0	0	0	0	0	2	0	1	3
firstTileUTR_01806	1099	2116	1527	1252	1963	1252	814	743	738	955	657	695			685	879	743	898	1244	391	1143	1142	923	992	577	409	1124	914
firstTileUTR_01807	2755	3252	4484	2603	2064	2281	1756	1281	1310	1527	1253	1335			2331	1814	1877	1352	2335	1044	2300	2639	2175	2269	1028	766	2213	1885
firstTileUTR_01808	952	1789	2072	1196	1963	1422	844	607	950	684	595	665			790	1059	813	1691	1304	413	1115	1171	914	878	777	434	1319	1066
firstTileUTR_01809	1059	1558	1343	1321	1338	907	566	709	634	725	480	569			1747	652	988	827	1157	308	1037	1153	1080	1070	606	381	1162	956
firstTileUTR_01810	173	142	246	300	373	213	72	75	179	130	93	121			156	203	124	172	136	82	144	179	123	152	65	49	189	105
firstTileUTR_01811	26	334	360	190	34	298	142	54	17	56	95	127			1	194	50	143	58	76	84	130	101	88	72	48	114	111
firstTileUTR_01813	0	0	0	0	0	0	0	0	0	0	0	0			0	0	0	0	0	0	0	0	5	0	0	0	0	0
firstTileUTR_01816	693	1513	1476	769	771	623	292	288	284	323	244	284			551	309	401	498	253	17	357	425	408	372	197	118	394	298
firstTileUTR_01817	133	1	93	0	127	74	38	0	22	23	34	40			0	35	51	126	137	1	44	40	20	35	15	15	29	43
firstTileUTR_01818	126	498	216	429	199	263	143	80	216	148	130	147			144	233	149	197	97	0	179	110	125	152	86	62	177	202
firstTileUTR_01819	337	664	947	828	706	648	332	388	263	240	197	194			0	23	101	435	146	170	328	367	330	278	109	96	275	261
firstTileUTR_01820	166	276	487	312	426	262	225	199	60	243	195	200			238	137	158	246	212	0	262	214	230	219	177	115	426	290
firstTileUTR_01821	125	171	325	74	284	227	147	101	57	168	52	61			0	139	67	0	107	0	113	150	35	22	35	23	88	64
firstTileUTR_01822	13430	24785	20396	16068	18717	17141	8292	8149	7497	7188	7417	8373			18681	19898	19996	14094	22464	6451	24246	24726	18259	18600	14839	8698	26286	22841
firstTileUTR_01823	15071	21774	18960	14628	17057	15356	8014	7415	7209	7704	7306	8300			18883	18162	16139	14145	20872	6414	22318	23121	17045	17241	14925	8571	26029	23167
firstTileUTR_01824	25	0	0	64	0	12	66	7	33	0	5	3			0	0	1	0	6	0	29	18	4	8	10	12	14	9
firstTileUTR_01825	0	0	0	0	0	0	0	0	63	0	3	3			0	0	0	302	0	0	0	0	8	10	3	3	8	7
firstTileUTR_01826	0	0	0	0	60	0	0	0	6	19	9	3			78	0	0	0	59	146	2	1	54	33	16	3	7	16
firstTileUTR_01827	20	0	123	0	0	0	23	0	0	27	23	16			11	0	1	0	27	26	21	10	23	44	9	14	14	24
firstTileUTR_01828	94	191	154	51	260	29	50	55	70	5	4	4			113	183	44	135	173	30	62	89	31	62	8	3	13	14
firstTileUTR_01831	747	1649	1176	1003	1021	1208	166	748	558	448	511	621			771	474	240	360	802	67	599	605	548	464	446	261	1003	938
firstTileUTR_01832	2135	3146	3145	1827	2906	2522	1115	1332	1432	1339	940	1299			944	1439	2146	854	1752	382	1736	1619	1508	1469	889	501	2143	1730
firstTileUTR_01833	2185	4068	2196	1555	2423	2621	1190	878	1048	1210	936	1037			5129	6242	4872	4139	7090	1996	6836	7391	5223	5290	3124	1729	6361	5366
firstTileUTR_01834	366	1249	1186	1341	1078	1079	675	540	566	682	516	670			2053	2352	1736	1377	2714	504	2669	2706	2748	2588	1791	1106	3770	3288
firstTileUTR_01835	36	185	51	56	21	0	41	57	12	0	40	50			83	107	0	39	101	0	78	134	57	40	64	42	112	88
firstTileUTR_01836	330	198	309	136	336	198	177	114	39	108	116	126			483	48	442	265	248	90	352	500	169	131	165	102	409	251
firstTileUTR_01837	0	30	36	0	0	0	0	24	0	0	27	23			0	44	48	0	0	0	0	5	0	0	7	8	19	14
firstTileUTR_01838	13	96	0	86	0	0	38	0	0	27	11	29			0	0	0	0	12	0	17	16	4	1	11	6	18	14
firstTileUTR_01839	26	181	28	0	107	141	0	0	1	0	9	30			0	0	0	3	0	0	14	4	34	25	15	12	21	23
firstTileUTR_01840	0	0	6	39	52	0	69	0	0	0	31	29			0	0	0	0	0	0	26	18	0	3	13	4	24	10
firstTileUTR_01841	0	0	0	0	0	0	0	0	0	0	5	6			0	0	29	0	0	0	0	0	0	0	2	1	12	7
firstTileUTR_01842	760	1675	1766	1192	1398	1183	622	784	698	613	481	493			824	1111	913	503	961	161	645	771	851	731	432	276	884	741
firstTileUTR_01843	1624	1785	1616	876	1510	1422	491	634	776	500	569	654			1080	551	681	492	665	160	896	1036	722	761	491	343	1069	888
firstTileUTR_01844	809	2039	1476	1557	1041	910	612	789	789	754	488	583			363	760	767	138	582	138	864	758	757	729	409	254	854	752
firstTileUTR_01845	820	1617	2060	1165	1495	1321	954	996	666	676	573	655			1119	951	590	319	801	515	982	1021	841	734	483	309	1057	881
firstTileUTR_01846	864	1616	2094	1509	2103	1612	459	562	650	535	598	667			639	519	722	668	822	254	587	698	624	504	485	326	994	809
firstTileUTR_01847	1759	2296	1564	1489	1395	1577	863	743	870	816	643	790			1186	759	1009	681	653	418	1083	960	1033	947	630	376	1150	979
firstTileUTR_01848	1975	3763	3133	2435	3128	2114	862	1251	1138	1011	1035	1084			2760	2203	1594	895	2071	941	2401	2324	1845	1728	1357	772	2704	2429
firstTileUTR_01849	1359	2020	1519	1521	1288	1206	541	830	473	857	690	778			998	864	1357	998	1588	320	1215	1199	1050	965	1011	542	1944	1634
firstTileUTR_01850	3982	7131	5233	4480	5343	4478	2670	2507	2515	2630	2111	2274			2484	1517	1110	1528	2118	1027	1846	2059	1894	1905	1123	704	2240	1903
firstTileUTR_01851	5254	9386	8314	6579	7294	5859	2905	3219	2590	3182	2577	3038			2193	2122	1837	946	2823	1327	2634	2673	2466	2453	1334	908	2619	2364
firstTileUTR_01852	5222	8312	6681	6106	6200	5229	3027	3311	2384	2678	2334	2756			2071	2515	2077	1319	2088	826	2715	2559	2477	2570	1398	840	2631	2365
firstTileUTR_01853	3858	7119	6660	5270	6541	5071	2512	2892	2245	2478	2258	2646			1679	1794	2214	1427	2066	437	2167	2166	2159	1977	1258	786	2504	1949
firstTileUTR_01854	13673	20619	19666	14896	16842	15590	7338	8715	6710	7719	7271	7775			10617	12357	10230	7907	13484	3660	13609	14068	11813	11212	7991	4771	16848	14604
firstTileUTR_01855	14161	24702	21702	19195	17519	16299	8764	9494	8313	8810	7968	8858			14116	13662	14322	10809	17671	4304	17489	18474	14334	14169	10748	5928	21506	18486
firstTileUTR_01856	12863	21953	20351	16632	16406	15416	7530	8597	7786	7730	7120	7753			11178	10872	8797	8051	12870	3297	12252	12582	10600	10401	7283	4162	15574	13636
firstTileUTR_01857	13191	20871	17207	15826	15783	13429	8102	8559	7039	8196	6782	7364			10582	10455	10618	8511	13793	3324	13524	13909	11728	10784	8268	4697	16473	14413
firstTileUTR_01858	1222	2512	2644	1286	1852	1761	821	1078	1001	879	730	887			2114	2633	1500	1099	1888	751	2147	2061	2074	1753	1054	641	2436	2043
firstTileUTR_01859	1332	2933	1523	1553	998	1740	759	1013	514	898	682	744			1337	1821	1434	1330	1654	617	1804	1659	1665	1622	1014	623	2315	1875
firstTileUTR_01860	7857	10854	12065	9363	10734	8372	4148	4518	3597	4662	4004	4726			3310	2746	2669	2364	2961	1662	3437	3379	3299	3516	2011	1341	4039	3381
firstTileUTR_01861	8484	13492	11509	9151	8363	9358	4419	5235	4313	5127	4301	4697			3453	3873	3263	2704	3469	1637	3619	3686	3985	3396	2079	1426	4427	3699
firstTileUTR_01862	366	446	507	93	82	102	181	135	91	72	191	191			161	122	97	87	128	38	218	280	109	154	152	85	351	318
firstTileUTR_01863	355	614	525	589	532	352	197	350	412	337	201	203			248	339	617	448	573	257	351	490	369	341	199	125	355	285
firstTileUTR_01864	279	225	465	425	449	604	100	331	260	161	266	223			575	104	299	109	320	169	276	264	318	323	190	119	606	425
firstTileUTR_01865	151	377	440	206	350	126	234	147	140	147	138	152			67	225	153	0	284	43	248	265	216	154	142	93	236	236
firstTileUTR_01866	435	674	870	165	708	400	274	196	213	262	125	142			600	556	216	127	451	257	431	416	358	335	141	86	287	221
firstTileUTR_01867	464	531	832	291	725	358	564	283	264	361	194	272			224	178	249	478	345	46	536	591	367	330	204	146	444	467
firstTileUTR_01868	374	155	382	312	354	399	110	319	220	230	135	174			333	91	300	1	230	0	244	198	162	219	151	97	291	214
firstTileUTR_01869	577	971	1012	863	860	1130	617	327	245	332	369	395			633	901	517	657	450	156	489	587	399	417	352	236	699	565
firstTileUTR_01870	1267	1662	1340	1169	839	607	576	647	465	354	422	498			1373	1483	744	1370	1174	580	1649	1949	1255	1296	775	435	1580	1339
firstTileUTR_01871	1111	1185	1292	2002	1773	1088	743	737	478	635	438	499			1151	770	1905	1485	1819	227	1397	1388	1354	1288	686	419	1446	1310
firstTileUTR_01872	681	1616	1288	641	1512	1012	556	582	576	423	537	642			1374	1486	1218	1040	1899	627	2437	2590	2088	1892	1477	809	2510	2085
firstTileUTR_01873	1536	3372	2434	3002	2154	1693	1023	931	1111	953	835	1000			3868	5360	2903	3815	4892	1167	4920	4784	3833	3872	2369	1487	4440	3734
firstTileUTR_01874	1011	1353	1338	895	1030	1423	734	506	453	418	464	498			723	621	609	170	830	226	689	744	696	590	467	305	982	793
firstTileUTR_01875	857	1225	824	1186	1374	1517	445	562	441	631	452	519			800	495	457	83	729	263	747	796	696	608	433	258	932	772
firstTileUTR_01876	602	1557	1107	2033	1114	894	414	713	533	496	658	686			861	1098	393	661	812	81	836	968	819	735	574	417	1221	1114
firstTileUTR_01877	1433	2038	1467	1754	1727	1646	460	499	463	526	647	777			1337	1277	928	952	1025	256	1033	1018	760	950	666	455	1314	1148
firstTileUTR_01878	937	1214	552	710	924	830	464	357	269	494	362	403			474	337	618	843	745	145	763	762	674	583	372	221	785	602
firstTileUTR_01879	1916	4916	4590	3311	3491	3640	1659	2204	1246	1259	1357	1506			963	1419	1474	715	1526	326	1670	1757	1572	1670	895	666	1627	1513
firstTileUTR_01880	1533	3505	2890	2383	3122	2166	1137	1543	854	1235	1018	993			751	1001	898	1262	1246	234	1129	1329	1394	1336	654	494	1317	1139
firstTileUTR_01881	3010	5065	3989	3186	3269	3051	1843	1718	1257	1675	1747	1781			1195	2445	1457	1287	1597	529	1798	1740	1611	1735	1126	673	2006	1664
firstTileUTR_01882	4938	9808	7908	7410	6440	6629	2844	4341	2787	3426	2796	2892			2614	2655	1953	2673	2868	1160	3436	3406	3501	3429	1707	1256	3218	2648
firstTileUTR_01883	3238	5531	5194	3923	3477	3498	1808	2405	1677	2058	1660	1721			1631	1614	1364	1830	1872	277	1835	2028	1721	1654	1013	641	1910	1525
firstTileUTR_01884	2900	5135	5982	5223	5342	3810	2381	2903	1898	2310	1961	2118			1505	1385	1406	1858	2223	941	1871	1929	2556	2510	1187	845	2288	1872
firstTileUTR_01885	2129	3356	2489	2318	3226	2525	1104	1512	1055	1152	1236	1371			2919	2198	2084	1187	2715	798	2885	2740	2278	2331	1757	1070	3660	3025
firstTileUTR_01886	1820	2643	2278	2118	3097	2513	1237	1006	685	1006	1205	1222			1815	2313	2074	2007	2172	915	2453	2451	1858	1837	1577	879	3139	2704
firstTileUTR_01887	894	801	666	643	918	605	404	341	271	256	361	358			1102	402	423	362	536	233	462	551	429	490	319	189	624	507
firstTileUTR_01888	782	837	866	662	647	891	372	416	557	400	340	439			657	448	240	293	667	108	698	635	589	632	352	225	637	559
firstTileUTR_01889	796	1688	1993	467	1496	663	365	585	438	529	498	587			570	458	279	529	528	92	355	376	535	431	228	212	460	373
firstTileUTR_01890	569	1637	778	937	996	835	529	488	343	564	478	496			268	128	0	237	294	291	244	270	390	487	224	205	488	340
firstTileUTR_01891	468	917	702	811	784	986	608	605	439	559	403	405			112	227	283	262	250	16	251	266	403	399	156	141	353	260
firstTileUTR_01892	1376	2257	2294	1480	1732	1099	818	1180	449	716	610	604			358	205	110	199	489	107	442	434	661	711	271	211	563	448
firstTileUTR_01893	868	1489	1597	966	1516	1077	524	507	662	792	543	557			229	334	99	378	497	89	405	450	669	690	244	180	519	391
firstTileUTR_01894	1029	1144	715	892	588	1095	484	471	407	525	534	560			0	119	300	25	209	25	221	259	405	430	236	183	424	313
firstTileUTR_01895	0	49	33	28	1	0	0	0	0	0	8	16			0	0	0	0	0	22	5	0	8	13	1	4	2	1
firstTileUTR_01896	37	215	102	106	85	50	88	0	4	23	15	14			0	0	0	0	20	0	26	19	7	32	6	4	18	14
firstTileUTR_01897	0	0	0	0	0	0	0	0	0	0	2	1			0	0	0	0	0	0	0	0	1	1	1	1	4	6
firstTileUTR_01898	0	0	0	54	0	0	0	17	0	0	13	20			0	0	0	6	0	0	0	9	40	37	13	3	31	40
firstTileUTR_01899	0	0	90	14	0	0	0	9	0	0	1	0			0	0	0	0	0	0	12	23	4	0	1	0	2	4
firstTileUTR_01900	0	0	0	0	0	0	0	0	0	0	6	22			0	0	0	0	0	0	0	0	0	0	8	6	21	9
firstTileUTR_01901	0	0	0	0	0	40	0	0	0	0	6	11			0	0	0	0	0	0	9	13	2	3	5	6	9	5
firstTileUTR_01902	0	0	0	42	0	67	0	32	14	6	0	3			0	0	0	46	0	0	14	10	10	8	1	0	6	2
firstTileUTR_01903	17	83	0	0	0	0	0	1	0	1	0	1			101	22	53	0	22	0	40	32	84	68	1	3	1	13
firstTileUTR_01904	0	0	0	0	0	0	0	0	0	0	6	0			0	0	0	0	0	0	0	0	0	0	7	1	12	8
firstTileUTR_01905	378	866	794	463	676	727	457	228	339	357	254	302			429	835	531	322	555	140	545	687	447	507	405	244	825	738
firstTileUTR_01906	4627	6982	8677	5277	6449	5413	3048	2709	2531	2995	2525	2820			7485	4591	5772	3612	7407	2596	6307	6651	5825	5629	3895	2245	7242	6651
firstTileUTR_01907	1418	2367	2515	1910	2199	1920	1175	880	849	557	926	1023			1641	1788	2004	867	2123	397	2299	2088	1917	1822	1439	859	2625	2227
firstTileUTR_01908	4183	6678	7118	5535	5105	5361	2895	2499	2632	2882	2266	2537			5482	6128	5869	3681	6643	1980	6115	6911	5410	5790	3457	2071	6661	5828
firstTileUTR_01909	2465	3226	5413	2744	3301	3249	1739	2055	1390	1646	1248	1426			2921	1556	1549	2596	2419	627	2532	2932	2462	2434	1340	775	2669	2379
firstTileUTR_01910	2228	3257	3278	3072	3368	2662	1544	1844	1697	1936	1273	1466			3278	1544	2139	1582	2246	760	2235	2246	2320	2129	1408	861	2806	2461
firstTileUTR_01911	2340	3537	3188	1809	3320	2158	1183	1287	1013	1121	1179	1329			942	1329	2436	563	1567	410	1448	1388	1226	1424	899	620	1963	1656
firstTileUTR_01912	2334	4570	4574	2598	3669	3155	1404	1489	1327	1623	1458	1671			1640	1877	1695	1681	2034	800	1779	1689	1737	1808	1140	670	2213	1967
firstTileUTR_01913	2960	3700	2703	2459	3056	3081	1237	1883	1508	1208	1203	1242			1482	1106	557	882	1584	483	1915	1902	1506	1516	922	559	1828	1611
firstTileUTR_01914	2556	3906	4590	3522	3683	3253	1448	2176	1873	1870	1314	1474			2222	1831	1642	1882	2191	628	2032	2117	2031	1889	1139	669	2056	1703
firstTileUTR_01915	735	1278	1410	1192	998	605	499	459	321	391	380	441			1763	1027	1362	732	1186	388	1641	1570	1302	1287	1056	613	1914	1612
firstTileUTR_01916	1483	3836	2236	2086	1720	2509	735	742	795	778	899	970			1742	2441	1975	2622	3726	1055	2921	3135	2954	2613	2075	1138	3871	3179
firstTileUTR_01917	0	0	0	0	0	0	0	0	24	0	8	5			0	0	0	0	0	0	0	0	31	46	14	8	31	30
firstTileUTR_01918	0	0	0	0	0	0	0	0	0	0	0	2			0	0	0	0	2	0	0	0	0	14	0	1	0	6
firstTileUTR_01919	0	194	233	0	237	121	140	1	82	36	0	0			99	46	238	8	186	201	210	211	150	107	1	0	10	2
firstTileUTR_01920	0	8	2	0	17	0	52	0	0	19	6	4			0	58	45	0	38	0	58	50	60	70	11	4	13	36
firstTileUTR_01921	125	90	0	52	77	0	27	18	23	53	32	35			278	30	418	75	212	0	99	128	98	48	70	44	152	196
firstTileUTR_01922	749	1683	1843	1418	1476	1280	692	895	571	825	668	787			987	1028	785	460	1203	512	1366	1215	1084	1089	755	442	1513	1172
firstTileUTR_01923	1132	1674	1790	1150	1228	1808	834	611	626	884	662	826			1205	810	1022	1021	938	440	1007	1204	1107	1184	654	484	1354	1113
firstTileUTR_01924	336	177	198	74	44	250	0	61	11	38	22	29			149	40	0	0	32	35	77	85	41	67	13	12	27	31
firstTileUTR_01925	10	92	201	139	45	43	19	115	37	0	25	32			0	96	72	0	62	0	107	77	42	35	21	10	25	21
firstTileUTR_01926	39	46	90	4	0	34	91	12	31	73	31	39			0	65	0	86	10	0	29	34	48	49	28	22	63	47
firstTileUTR_01927	50	2	4	201	0	54	120	99	40	69	51	51			49	0	0	151	28	0	21	15	64	95	23	19	57	51
firstTileUTR_01928	2736	4188	4094	3007	2937	3389	1875	2106	1674	1725	1491	1798			2326	1964	1470	1878	1655	451	2233	2231	1751	1894	1268	798	3183	2757
firstTileUTR_01929	3549	4719	3407	3458	4461	3639	1549	1625	1413	2034	1658	1854			2291	2511	1943	1400	3282	633	2531	2615	2448	2498	1628	916	4148	3141
firstTileUTR_01930	1252	2010	1549	1017	1512	1416	644	885	792	929	699	769			1074	626	1064	872	974	132	938	936	872	967	630	423	1255	1020
firstTileUTR_01931	1394	2633	2489	1857	2604	1928	1159	1187	831	894	919	1203			1027	1188	994	910	1195	579	1288	1360	1290	1110	782	490	1702	1419
firstTileUTR_01934	40	0	0	0	0	0	11	0	0	0	16	7			39	0	0	0	0	0	0	0	0	0	8	7	25	20
firstTileUTR_01935	107	107	48	310	99	147	58	77	144	18	29	33			53	28	11	1	14	0	46	52	72	73	20	10	31	33
firstTileUTR_01936	1259	818	801	1041	1031	515	451	247	349	209	261	331			1058	987	1338	1083	1631	282	1738	1626	1179	1471	772	467	1352	1199
firstTileUTR_01937	287	236	393	748	445	458	182	202	314	306	268	301			774	813	793	936	1057	218	871	827	959	1102	618	421	1189	979
firstTileUTR_01938	701	724	716	478	106	537	191	230	108	228	233	249			1033	488	466	659	1012	98	698	755	603	659	442	313	912	819
firstTileUTR_01939	326	398	251	162	345	360	143	39	136	203	130	131			1189	851	416	225	300	91	396	448	482	444	351	198	686	529
firstTileUTR_01940	43	195	351	274	439	175	209	53	94	163	124	137			568	141	447	153	564	206	536	457	504	450	487	263	918	815
firstTileUTR_01941	312	402	489	103	352	133	138	186	89	6	65	116			1212	888	495	945	1265	205	907	1128	610	581	388	260	939	781
firstTileUTR_01942	1	83	365	168	64	139	120	72	26	2	73	88			375	361	146	311	655	180	481	477	93	104	256	197	584	475
firstTileUTR_01943	0	0	0	0	0	0	0	0	0	0	6	0			0	0	0	0	0	0	0	0	0	0	2	4	3	5
firstTileUTR_01944	98	22	135	40	86	154	7	71	0	0	49	43			272	5	21	172	158	55	266	273	83	115	168	81	260	287
firstTileUTR_01945	1496	2037	1839	1784	1268	1717	754	1061	543	856	688	740			728	348	1218	1031	831	241	854	913	629	589	687	373	1155	962
firstTileUTR_01946	934	1837	1804	1567	1254	1173	642	671	450	574	683	715			487	841	498	403	1046	141	836	991	499	555	574	276	1061	836
firstTileUTR_01947	110	95	36	0	74	128	60	0	25	27	27	25			0	1	0	115	29	0	88	90	65	80	44	37	106	43
firstTileUTR_01948	62	5	26	76	36	193	38	0	61	16	36	29			264	149	57	96	50	30	34	42	82	54	50	26	116	64
firstTileUTR_01951	1074	1260	1936	865	1765	1996	716	787	708	830	562	729			613	453	564	97	911	209	762	922	830	928	324	176	567	477
firstTileUTR_01952	108	175	224	192	22	205	115	84	37	72	34	40			32	49	74	0	108	71	89	64	92	102	14	11	37	22
firstTileUTR_01953	518	1413	968	814	627	972	489	649	335	489	543	637			720	430	356	247	537	427	576	559	622	686	320	205	521	457
firstTileUTR_01954	1293	1105	1723	1372	1216	1245	593	265	468	666	412	449			636	672	553	575	723	390	605	570	671	708	219	160	362	355
firstTileUTR_01955	13490	25555	23638	16722	19281	16502	7914	10237	6487	7367	7387	8040			9695	6244	4892	7120	8328	3495	7875	7749	8204	7979	4680	2932	7964	7025
firstTileUTR_01956	13027	22596	18639	16108	16510	14506	7022	8883	7079	7549	7091	7790			7010	7006	4527	8055	6968	2738	6350	6565	7579	7092	4351	2769	7566	6381
firstTileUTR_01957	13630	21133	17819	15663	16324	14541	7845	8244	6945	7846	7328	7879			8705	6621	6154	6714	6926	3210	6805	7331	7971	8008	4519	3125	8050	6969
firstTileUTR_01958	14255	23733	20082	17683	18984	17221	7643	8357	7550	8751	7717	8307			7790	7122	5914	8172	8348	3653	7083	7619	7814	8245	4645	3017	8185	7012
firstTileUTR_01959	12786	23533	21232	15435	16413	14418	8330	9927	6965	8360	7373	8023			9006	6821	6304	6451	7594	3584	7452	7505	8528	8668	4525	3126	7963	6829
firstTileUTR_01960	55	372	57	0	343	387	71	62	53	29	80	78			75	144	45	0	148	2	102	136	95	87	47	37	99	88
firstTileUTR_01961	84	160	101	31	9	142	32	0	0	30	40	29			77	41	58	0	79	0	55	12	29	31	21	20	50	49
firstTileUTR_01962	290	241	360	130	449	383	173	139	122	131	103	124			397	99	124	0	96	0	211	200	183	165	82	68	168	154
firstTileUTR_01963	26	51	158	0	0	2	10	19	59	38	26	18			73	25	174	0	16	0	2	4	24	16	4	14	27	27
firstTileUTR_01964	4281	8258	7275	6585	6543	6217	3785	3363	2936	3007	3193	3437			6872	5965	6028	4070	6760	2803	7851	8708	7046	7227	4986	2863	9125	7535
firstTileUTR_01965	6891	9523	11355	8565	10460	9712	3893	4511	3638	4508	3598	3851			9265	7695	7631	8373	10197	2613	9709	9996	9125	8763	4943	2896	8757	7247
firstTileUTR_01966	4241	6547	7003	5117	6194	5938	2761	3082	2746	2888	2240	2610			5452	4492	4110	4281	4736	2069	5296	5483	4833	4618	2870	1667	4929	4166
firstTileUTR_01967	4367	8247	7269	5584	6951	5918	2595	2957	2964	3289	2675	2977			3492	3673	3189	3234	4055	1655	4063	4174	4523	4168	2864	1650	4778	3993
firstTileUTR_01970	0	0	0	0	0	51	0	17	0	0	27	31			0	43	0	0	0	0	113	122	212	177	526	284	1433	1030
firstTileUTR_01971	0	1	0	0	0	45	0	15	0	0	19	21			2	298	221	87	299	0	248	257	482	392	384	210	607	451
firstTileUTR_01972	61	1	3	181	61	57	0	0	43	40	20	15			172	159	1019	1353	1013	476	872	918	1946	2056	422	156	1071	657
firstTileUTR_01973	0	0	0	0	0	0	0	0	0	0	5	8			0	148	0	86	0	0	47	58	177	142	115	140	264	366
firstTileUTR_01974	510	1613	467	531	766	462	235	431	363	548	210	303			818	854	415	485	790	300	649	796	835	806	311	203	615	570
firstTileUTR_01975	302	240	348	395	608	250	123	127	103	141	147	182			365	168	645	0	321	0	264	166	268	308	173	141	376	325
firstTileUTR_01976	633	323	632	601	889	233	282	219	265	300	173	154			453	392	881	519	366	84	421	453	486	411	174	80	350	265
firstTileUTR_01977	379	1058	847	733	803	827	448	652	336	506	400	448			501	526	1441	628	752	135	775	676	895	783	503	295	1082	815
firstTileUTR_01978	382	786	708	912	569	612	364	346	114	96	277	315			687	422	306	507	703	84	642	685	510	476	315	224	711	612
firstTileUTR_01979	504	685	932	913	627	399	309	420	304	375	241	264			153	426	245	828	406	260	569	549	517	485	334	184	511	472
firstTileUTR_01980	101	172	151	68	62	93	89	44	8	17	63	85			131	88	145	1	15	93	60	56	56	60	68	37	135	117
firstTileUTR_01981	216	508	112	243	93	196	19	27	90	17	61	35			1	104	0	152	23	0	183	146	97	164	40	24	74	50
firstTileUTR_01982	80	397	299	194	302	0	188	156	163	67	75	77			114	63	1	110	134	0	62	98	106	115	60	41	72	72
firstTileUTR_01983	120	151	0	119	14	41	59	3	44	25	55	54			65	45	62	145	23	117	54	53	56	53	46	41	48	77
firstTileUTR_01985	11	0	0	0	0	0	0	66	0	0	1	1			0	0	0	0	0	0	25	4	0	0	1	0	3	0
firstTileUTR_01986	0	0	39	21	0	157	0	29	0	0	3	8			0	0	8	2	97	6	44	47	42	19	10	10	26	15
firstTileUTR_01987	40	35	0	0	80	46	54	31	10	0	14	12			0	0	0	245	45	0	25	28	45	26	13	4	47	52
firstTileUTR_01988	0	0	0	0	0	0	12	0	0	0	0	5			0	0	0	0	0	0	0	3	0	0	5	9	28	14
firstTileUTR_01989	0	0	0	0	66	0	16	0	12	0	3	4			249	0	0	0	0	0	4	10	0	0	3	2	14	9
firstTileUTR_01990	80	0	115	0	213	0	1	81	0	84	11	9			116	90	0	0	84	0	130	76	103	80	28	17	75	65
firstTileUTR_01991	112	145	25	0	222	69	0	144	81	28	46	46			0	65	116	0	194	58	124	175	100	71	103	48	125	159
firstTileUTR_01993	0	0	0	0	0	0	0	0	0	0	1	0			0	0	0	0	0	0	0	0	0	0	2	0	0	4
firstTileUTR_01995	0	0	0	0	0	0	0	0	0	17	0	0			0	0	0	0	0	0	5	2	14	2	1	0	0	0
firstTileUTR_01996	0	0	0	0	0	0	24	0	0	0	4	3			0	0	0	0	0	0	2	0	0	0	3	2	4	3
firstTileUTR_01998	660	685	946	682	300	402	194	340	182	190	258	220			1000	975	1226	656	700	144	951	998	572	746	510	230	966	743
firstTileUTR_01999	571	736	428	579	469	473	168	346	207	179	194	224			873	602	160	85	660	251	681	761	399	315	502	266	963	726
firstTileUTR_02000	236	568	169	444	514	1	142	430	172	332	160	176			412	516	413	232	361	87	715	701	519	548	364	153	638	530
firstTileUTR_02001	329	988	521	375	631	394	186	376	95	383	242	261			799	878	645	852	649	83	707	913	455	427	574	270	901	662
firstTileUTR_02002	1240	3318	2390	1899	2773	1683	1235	1321	1120	991	808	982			2386	2726	2204	1967	3397	1022	3854	4028	3067	2964	1689	1045	3388	2775
firstTileUTR_02003	2421	3453	2813	1845	2312	3194	991	1141	1096	1263	1012	1143			3223	2545	2548	2061	3504	898	3583	4034	3435	3350	2081	1244	4116	3260
firstTileUTR_02004	28200	42824	41925	32204	36594	33063	16609	17509	15571	19527	14007	16718			60851	59222	52288	48683	69609	18336	69064	73564	63851	63157	34871	21253	74976	64017
firstTileUTR_02005	21154	36898	34069	27581	29039	27064	12605	13443	12445	12484	11372	13496			47255	42203	42042	37351	51133	14323	51854	53999	46180	46075	26934	16343	57455	48825
firstTileUTR_02006	22466	38557	35308	28478	33277	29301	13128	14538	12906	15260	11773	14103			56245	51732	50867	42511	66664	17890	63326	66570	60006	58760	34064	20807	72491	62007
firstTileUTR_02007	25550	39283	40187	27413	35708	29355	14093	15131	13653	15893	13653	16243			58457	54827	52164	44478	68077	19823	65876	68575	61610	62524	38264	23533	79871	70523
firstTileUTR_02008	1090	2070	1455	1784	1387	1262	594	634	656	818	499	589			656	740	393	544	663	57	531	670	650	585	428	236	821	754
firstTileUTR_02009	978	2558	1799	1917	1669	1102	663	590	616	758	755	802			291	940	690	549	727	208	880	747	693	657	570	348	1236	1042
firstTileUTR_02010	647	1140	726	1602	859	1440	466	517	482	685	530	637			563	521	358	82	312	52	340	315	286	341	324	216	602	494
firstTileUTR_02011	2811	4353	3636	3934	3274	2733	1363	1889	1557	1525	1298	1429			1196	1064	605	864	1208	494	933	998	1148	1155	720	485	1304	1171
firstTileUTR_02012	1	0	0	0	0	52	0	38	22	0	18	13			0	22	0	73	0	0	43	53	50	14	18	7	39	27
firstTileUTR_02013	2	51	46	33	36	0	29	20	43	139	37	31			0	4	11	49	1	39	26	31	59	99	36	32	62	51
firstTileUTR_02014	18	0	0	0	0	198	0	0	33	0	11	16			0	0	0	0	4	0	0	3	5	12	19	14	23	20
firstTileUTR_02015	21	0	0	117	24	52	52	210	61	58	77	88			0	127	12	0	13	0	96	105	96	93	124	69	145	145
firstTileUTR_02016	22	103	12	46	0	42	0	0	102	12	29	22			44	244	0	15	0	0	60	38	19	17	26	19	44	32
firstTileUTR_02017	819	1304	1291	1132	935	628	730	744	635	750	355	408			396	1040	897	905	1057	434	1111	956	1069	976	433	262	869	802
firstTileUTR_02018	475	893	543	845	580	238	391	465	486	433	343	362			645	599	848	776	756	218	757	817	662	781	503	274	881	850
firstTileUTR_02019	5115	7491	7959	5818	5938	5639	2953	2917	2933	3330	3981	4673			4611	5014	4565	4615	6079	1771	6040	6318	5168	5440	5332	3283	11687	10106
firstTileUTR_02020	3941	9390	7313	5460	6490	6049	2640	2913	2940	2668	3693	4302			3547	4703	5338	3414	6072	1147	5354	5655	5088	4588	4818	2894	10636	9144
firstTileUTR_02021	1937	4119	2952	2886	2840	2867	1139	1198	968	1292	1337	1336			4839	5155	5786	4133	6251	2141	6516	6763	5237	5315	4044	2283	7731	6269
firstTileUTR_02022	2411	4153	3631	3594	4279	3996	1727	1744	1544	1566	1698	1797			6900	5853	6156	5440	7845	2433	7674	8076	6920	6678	4952	2705	9387	8133
firstTileUTR_02023	3417	6644	7461	6789	5338	6750	2410	2925	1850	2813	2462	2619			11344	8491	9080	9045	10602	3166	11994	11847	9850	9457	7404	3987	13499	11658
firstTileUTR_02024	2359	3539	3682	3796	4028	2791	1241	1472	1426	1566	1548	1860			5054	5518	4935	2569	6728	2409	6706	6371	5357	5477	4638	2585	8911	7217
firstTileUTR_02025	2506	5101	5096	3863	3503	3517	1874	2172	1834	1627	1538	1787			6790	5743	7400	6351	7255	2760	9293	9435	7017	7004	4874	2811	9241	7390
firstTileUTR_02026	2575	5902	5428	4254	4015	4383	2077	2000	1686	2250	1477	1678			6538	7786	6795	5414	10655	2194	10994	10613	8084	7790	5072	2830	9677	8351
firstTileUTR_02027	5308	7926	7107	5953	5597	5180	3118	2878	2301	2804	2436	2685			9819	9684	8350	9817	13010	3494	12918	13892	10397	10529	6430	3843	12790	11158
firstTileUTR_02028	2401	3734	3231	2855	3029	1849	1473	1223	901	1019	992	1067			1387	1279	1065	1041	2135	599	1938	2065	1717	1654	877	579	2255	1731
firstTileUTR_02029	4374	7022	6077	4471	5260	5107	2128	2751	2220	2309	2006	2173			3491	2802	3256	2511	3122	1512	3270	3514	3044	2936	1689	1158	4649	3625
firstTileUTR_02030	1919	3883	3335	2496	2528	2052	1559	1250	1152	1222	1053	1283			4786	5763	4884	5133	7168	2189	5686	6083	4735	4907	3661	2009	7199	6129
firstTileUTR_02031	1833	2018	2689	3111	2654	2001	1227	1055	712	1103	1087	1213			5132	4134	4524	4328	5671	1686	5836	5608	4278	4253	3797	2067	7258	6260
firstTileUTR_02032	3068	4356	5229	3397	3703	3824	1422	1691	1401	1684	1670	1728			8707	9594	9177	6818	10406	1967	10074	10347	7746	7643	6105	3305	12127	9908
firstTileUTR_02033	1376	3333	3183	2818	3152	2407	1179	704	666	763	853	979			4609	4854	4466	4845	6904	2064	5129	5535	3766	3838	3166	1706	6310	5353
firstTileUTR_02034	1845	3818	3300	3240	2375	2589	1382	1383	1265	1092	1247	1284			4053	5659	4375	3778	5260	1107	6405	6087	4480	4406	3818	2079	7521	6223
firstTileUTR_02035	1616	1918	1975	1363	1919	1494	691	706	872	685	1068	1216			4526	3397	3663	2356	5288	1674	4442	5216	3427	3560	4539	2467	8888	7900
firstTileUTR_02036	10438	16909	16307	14347	13204	13271	5799	6977	5714	6029	5332	6127			10581	10958	9935	8824	12415	4278	11200	11870	11435	11557	6240	4124	11864	9994
firstTileUTR_02037	7874	15007	14573	10912	11691	8845	5671	6288	5194	5283	4847	5449			9431	9447	9332	8580	10989	3113	11012	11547	11030	10576	5994	4047	11703	9854
firstTileUTR_02038	12717	21497	22045	16627	18300	16026	6615	8465	7552	7914	6826	7970			12006	12450	12550	11776	15846	5278	14896	15214	13764	14272	8074	5413	16364	13560
firstTileUTR_02039	5739	11554	8317	8422	7425	6897	4208	4754	2907	3556	3319	3763			6416	4682	4488	6082	5495	2570	5646	5632	5445	5911	3241	2293	5943	5203
firstTileUTR_02040	7828	14043	12658	8742	9432	8368	5222	5559	4710	4987	3826	4304			8292	7498	6661	5972	8694	2725	8980	9089	7846	7984	4275	2896	8419	6877
firstTileUTR_02041	8257	16311	13230	11451	12373	11540	6272	6469	5456	5212	5307	5793			9222	8454	8038	6754	9976	3012	9468	9765	9427	9672	5903	3790	10566	8638
firstTileUTR_02042	10137	16157	14061	12058	14071	11016	6140	7086	5962	5683	5333	6060			10423	8128	9055	7190	12622	3252	10617	11052	10011	10221	5993	3997	11651	10165
firstTileUTR_02043	18654	31344	29567	21788	26515	21958	11019	12943	10451	13554	9214	10532			17381	17931	17414	15195	22314	7012	21271	22203	20337	20781	11122	7173	20704	18001
firstTileUTR_02044	0	22	115	90	218	406	51	55	69	34	49	48			50	35	77	0	159	254	128	137	173	206	75	26	108	102
firstTileUTR_02045	84	220	273	215	241	134	19	68	32	45	26	31			61	50	289	134	176	0	146	123	77	134	47	38	105	74
firstTileUTR_02046	37	30	250	0	76	204	19	119	0	6	50	43			221	0	184	179	126	0	49	82	80	36	46	33	85	85
firstTileUTR_02047	125	391	267	199	291	178	45	71	70	62	67	75			22	6	40	402	277	0	102	191	84	106	73	39	181	134
firstTileUTR_02048	106	32	141	83	81	93	49	3	94	67	46	62			132	0	52	0	169	0	62	57	59	101	71	39	145	84
firstTileUTR_02049	188	500	478	560	495	234	239	235	163	252	195	218			457	509	258	370	506	76	496	547	300	363	348	200	603	543
firstTileUTR_02050	721	684	811	544	848	365	485	365	404	159	377	381			502	1010	935	46	1082	162	1020	1026	727	803	748	378	1318	1242
firstTileUTR_02051	537	935	1102	755	925	679	431	328	320	362	355	354			758	1560	919	572	1544	352	1123	1073	1298	1402	692	394	1573	1207
firstTileUTR_02052	272	997	509	300	779	893	336	334	179	74	228	262			723	873	388	762	552	57	661	614	651	618	363	234	745	552
firstTileUTR_02053	542	445	971	762	1033	1123	294	339	337	298	323	391			777	491	617	356	636	318	800	714	640	523	555	247	903	762
firstTileUTR_02054	668	833	1205	713	603	399	147	333	338	486	385	417			568	601	797	528	967	44	620	672	591	637	563	350	947	876
firstTileUTR_02060	14386	24470	19055	17915	18801	15397	8332	8917	7457	8909	6915	7517			7444	6917	5665	5243	7940	2686	7458	8219	7045	6873	4010	2682	7960	6946
firstTileUTR_02061	14968	25456	24857	18111	18765	18030	8961	9361	8987	8336	7598	8299			10306	9361	5919	8716	9278	2571	8566	8870	8224	8313	4430	3039	8794	7744
firstTileUTR_02062	14155	24355	23269	18427	18964	18071	8835	10949	8414	9006	7564	8324			8538	8302	6478	8156	10557	2696	9867	9932	10191	9482	5265	3518	10267	8827
firstTileUTR_02063	11511	19384	18749	15284	14968	15228	7614	7466	6002	6589	6425	7045			5224	5645	5215	5664	7468	3022	7465	7830	7373	7540	4064	2808	8183	6720
firstTileUTR_02064	1722	3569	3089	1641	2127	1664	951	1393	1186	889	1125	1140			1977	1179	296	749	974	402	894	988	1226	1249	808	597	1360	1185
firstTileUTR_02065	1772	2178	2585	1770	2178	2216	1114	919	932	818	921	953			894	820	737	460	1066	443	983	1028	1203	1226	676	533	1330	1076
firstTileUTR_02066	6830	10757	10722	8096	8176	7715	4084	4008	3444	3637	3187	3781			5985	7520	5175	5960	8479	2575	8562	9055	7542	7472	4956	3017	10453	8792
firstTileUTR_02067	7261	10720	11146	8418	8858	7522	4344	4330	4174	3962	3910	4568			8755	8344	7285	4933	8620	3034	8894	9964	8323	8431	5685	3559	12309	10284
firstTileUTR_02068	3603	7182	5315	3385	5581	4947	1887	2443	2175	2828	2258	2547			4892	4028	3555	3382	5642	1904	5141	5476	4740	4910	3253	1969	7021	5600
firstTileUTR_02069	3850	6006	6180	4559	5290	4147	2209	2979	2198	1771	2228	2600			5163	3303	3764	3427	5049	2236	5705	5877	5086	4648	3107	1932	6620	5689
firstTileUTR_02070	816	1526	668	1162	928	1127	670	525	378	283	278	316			1347	1222	1205	817	1147	212	1256	1342	984	1001	426	293	840	753
firstTileUTR_02071	798	602	684	905	600	1250	456	482	255	304	235	284			462	276	761	329	835	167	861	930	739	566	371	220	650	476
firstTileUTR_02072	610	1552	1315	928	1023	865	379	508	361	366	367	300			725	870	872	432	1142	373	1159	1249	728	917	543	348	899	800
firstTileUTR_02073	646	850	615	408	718	481	305	411	358	431	308	350			742	846	491	428	954	253	1074	1133	985	996	424	303	777	620
firstTileUTR_02074	776	1044	1058	1278	779	923	408	411	311	414	387	397			375	788	614	664	906	121	1078	1279	1073	798	484	331	908	834
firstTileUTR_02075	249	758	574	389	344	234	203	448	105	123	190	263			433	464	579	517	496	330	617	609	358	408	256	185	431	352
firstTileUTR_02076	5375	9916	7801	6864	7513	6637	3252	2983	3146	3482	2916	3391			5553	5857	5532	4990	6423	1911	6397	6401	6154	6214	3547	2387	7120	6153
firstTileUTR_02077	3724	5407	6355	4785	3833	4656	2249	2820	2093	2317	2079	2303			3378	4570	3395	3906	4355	1106	4479	4550	3989	4461	2752	1610	5308	4473
firstTileUTR_02078	3190	5390	4628	3804	4317	4014	2120	1975	1712	2051	1963	2230			1727	3264	2891	1871	2954	1245	3389	3488	2798	2843	1936	1282	3895	3343
firstTileUTR_02079	4996	7682	6742	4913	6208	5753	2319	3105	2506	2657	2282	2644			6003	5149	3936	4634	5363	2433	5193	5264	5299	5239	2977	1929	5905	4984
firstTileUTR_02080	4448	6048	6067	4673	5173	4915	2070	3041	2291	2368	2184	2437			3548	4594	3368	3643	5392	1093	5259	5308	4879	4729	3010	1872	5887	5117
firstTileUTR_02081	1920	4332	4180	2889	3055	2462	1387	1138	1265	1495	1237	1358			2622	2209	1902	1629	2971	791	2625	2505	2521	2642	1463	978	3068	2732
firstTileUTR_02082	4661	7506	6702	5973	6050	4136	3205	2091	2207	2630	1900	2138			3268	2691	3077	2355	3780	924	3550	3377	2964	2752	1655	1010	3373	2790
firstTileUTR_02083	2643	5323	4037	3600	4237	2787	1498	1724	1464	1695	1420	1552			2815	3815	3207	1819	3705	947	3347	3416	3008	2919	1817	1067	3692	3285
firstTileUTR_02084	0	0	0	0	0	0	0	0	0	0	2	2			0	0	0	0	0	0	0	0	0	0	2	0	4	0
firstTileUTR_02085	0	0	0	0	0	0	0	24	0	0	0	5			0	0	0	0	0	0	0	3	0	0	0	2	2	9
firstTileUTR_02086	0	0	0	0	0	0	0	0	0	0	3	7			0	0	0	0	0	0	0	0	0	0	8	4	17	15
firstTileUTR_02087	0	0	0	0	0	0	0	0	0	0	1	2			0	0	0	0	0	0	6	0	2	2	3	1	1	2
firstTileUTR_02088	1344	2232	1958	1529	990	1143	601	437	620	769	542	586			784	617	840	415	706	176	874	806	823	827	360	295	746	593
firstTileUTR_02089	1296	1392	2241	1787	1328	1444	799	1065	655	790	604	653			1175	570	809	760	610	241	998	981	1016	1077	382	301	783	655
firstTileUTR_02090	1062	1306	1545	843	1673	1347	358	611	507	522	455	567			701	495	227	112	649	194	650	566	899	755	350	261	627	559
firstTileUTR_02091	1041	2580	1482	942	995	1057	928	823	913	888	618	659			772	592	623	828	762	257	812	849	744	872	438	320	812	617
firstTileUTR_02092	4813	6341	6332	4784	5512	5169	2352	2868	2383	1975	2522	2768			2544	3439	2852	2231	3532	1056	3361	3616	2906	2758	2178	1320	4396	3992
firstTileUTR_02093	4642	6360	8988	6501	5330	4560	2500	3020	2273	2756	2373	2617			2093	3085	2651	2633	3176	1221	3518	3781	2898	2948	2157	1297	4516	3713
firstTileUTR_02094	2746	5278	4414	3801	3762	2578	1391	1781	1193	1734	1449	1547			4950	3828	3779	2582	5413	1597	4423	4373	3781	3633	3016	1623	5301	4614
firstTileUTR_02095	2722	3901	3761	2621	3132	2439	1583	1751	1306	1726	1298	1421			4209	4190	2701	2538	3950	924	4012	4559	3667	3941	2704	1486	5213	4373
firstTileUTR_02096	208	671	524	225	694	213	142	251	299	193	107	163			107	143	340	307	324	55	325	325	418	389	156	94	360	298
firstTileUTR_02097	67	92	382	111	81	180	56	129	30	119	119	115			164	62	91	0	301	91	217	300	217	223	188	94	303	287
firstTileUTR_02098	297	523	248	183	127	340	118	277	144	237	232	263			827	201	331	90	265	13	583	561	376	368	331	188	709	513
firstTileUTR_02099	304	398	123	175	509	141	90	93	80	62	111	108			379	409	51	35	143	115	267	309	380	345	157	101	323	295
firstTileUTR_02101	0	0	0	0	0	0	0	0	0	0	0	0			0	0	0	0	0	0	0	0	0	0	0	0	0	2
firstTileUTR_02104	1735	3763	3055	2614	2837	2153	1454	1565	1208	1727	1163	1127			1130	1574	1146	671	1552	433	1591	1862	1735	1802	1050	637	1995	1769
firstTileUTR_02105	2518	3848	4187	2406	2986	2738	1229	1192	1174	946	1279	1321			1912	1890	1512	1219	1686	179	1778	2042	1819	1816	1147	684	2147	1888
firstTileUTR_02106	1279	2089	1430	1345	1646	1065	657	558	803	737	681	789			732	1112	1194	405	976	119	1009	1191	1017	1146	697	456	1477	1222
firstTileUTR_02107	1701	3100	3831	2148	2951	3083	955	1641	1467	1629	1194	1343			2931	2168	2941	1361	2308	876	2491	2672	2322	2284	1324	764	2644	2243
firstTileUTR_02108	2004	3161	2471	1864	3051	3048	1188	1548	1209	1356	1132	1261			1096	2342	1426	1753	1895	716	1719	1988	1778	1797	1162	717	2320	2014
firstTileUTR_02109	5230	6805	5261	6394	5767	4856	1851	2349	2231	2520	2209	2492			13253	10682	9263	8293	11823	2337	11961	12596	10779	10918	6635	3783	13015	10971
firstTileUTR_02110	6465	11154	9406	7278	7731	6339	3742	3548	3284	3664	3623	4212			15688	14950	13733	8524	17400	5029	16928	17236	14612	14775	10574	6083	20243	17504
firstTileUTR_02111	23	198	211	153	135	36	25	122	188	44	62	82			213	103	152	85	84	0	89	133	110	103	103	54	203	147
firstTileUTR_02112	148	302	201	217	226	208	115	196	16	73	64	71			341	32	70	0	167	0	205	194	113	92	69	36	194	112
firstTileUTR_02113	33	0	27	157	295	0	78	63	25	1	33	18			0	98	0	0	69	0	56	90	23	30	25	18	48	25
firstTileUTR_02114	73	49	95	84	104	104	90	81	28	1	26	36			0	37	54	88	130	0	86	67	83	50	37	22	74	48
firstTileUTR_02115	0	0	0	0	88	0	0	22	25	32	43	35			131	21	0	45	15	0	61	49	27	36	48	23	99	89
firstTileUTR_02121	0	0	0	0	0	0	0	0	0	0	4	0			0	0	0	0	0	0	0	0	0	0	0	3	1	0
firstTileUTR_02122	0	0	0	0	0	0	0	0	0	0	0	0			0	0	0	0	0	0	0	0	0	0	0	0	1	1
firstTileUTR_02123	2245	4460	4685	2490	3286	2666	1670	1853	1596	1801	1600	1792			7374	7905	7255	5696	9001	1918	9562	9768	9035	8896	6927	3664	13204	11063
firstTileUTR_02124	2555	3704	4294	4072	3825	2833	1591	2056	1252	1891	1727	1801			9188	7768	9021	6665	10006	2012	11079	11722	8473	8157	6861	3793	13081	11252
firstTileUTR_02125	2843	4677	4713	2875	4058	3376	1718	1617	2120	2077	1310	1397			2596	1291	832	648	1694	517	1852	1857	2126	2386	978	746	1918	1576
firstTileUTR_02126	2133	3779	3311	2319	2753	2010	1352	1646	1064	1422	1347	1341			2099	997	245	1280	1166	667	1368	1375	1580	1698	804	579	1477	1221
firstTileUTR_02127	184	600	359	370	381	555	280	127	162	142	172	191			129	321	75	576	448	21	478	516	333	300	340	157	549	506
firstTileUTR_02128	990	1669	1408	901	435	754	324	461	214	207	361	389			1322	1009	990	1464	944	209	996	868	679	684	590	325	989	910
firstTileUTR_02129	531	378	875	371	526	717	240	258	151	383	245	284			1053	545	773	463	694	339	780	904	709	713	422	209	711	695
firstTileUTR_02130	511	1038	1117	924	1123	645	422	483	468	337	372	438			1025	902	842	215	1436	392	1128	1178	1014	1021	708	391	1168	1108
firstTileUTR_02131	54	50	0	68	0	42	24	99	0	47	12	13			51	0	0	0	42	0	99	60	39	48	11	12	18	27
firstTileUTR_02133	42	0	25	180	100	298	91	8	0	177	25	42			55	0	1	0	144	99	102	79	75	71	38	23	65	77
firstTileUTR_02143	14245	22924	21458	18349	19259	16730	8857	9174	7954	8447	7025	8310			7307	6541	5802	6479	7844	2095	8302	8240	6491	6475	4337	2518	9623	8505
firstTileUTR_02144	13155	23063	21034	14790	17161	15240	8019	9048	8042	8003	7635	9101			4999	3934	3679	3193	4772	1853	4644	5005	4144	4010	3118	1655	7209	5996
firstTileUTR_02145	15266	23374	21049	18320	19939	17556	8167	10140	8571	9990	7634	9290			7082	6523	7730	5205	7949	2549	8595	8906	7285	7529	4929	2815	10745	9418
firstTileUTR_02146	10558	20347	17299	13127	14698	11437	6788	6868	5916	6588	5428	6511			5464	5242	3848	4451	5452	1534	5419	5919	4954	4886	3445	1987	7687	6303
firstTileUTR_02147	11875	19761	19592	14121	15757	14676	6363	7371	6676	6993	6813	7824			3578	2760	3591	2954	3550	1372	3666	3673	3125	3245	2521	1451	5890	5176
firstTileUTR_02148	996	1259	2196	1321	1776	1394	405	789	562	393	610	654			733	673	684	148	804	284	909	765	619	750	504	287	1045	848
firstTileUTR_02149	1043	1397	1289	601	1050	1025	456	434	415	547	517	708			497	522	720	50	505	106	547	549	480	471	417	260	857	758
firstTileUTR_02150	1791	1693	1707	1701	1823	1992	771	904	582	814	612	807			568	1047	1124	615	1157	119	970	1035	996	923	545	357	1193	889
firstTileUTR_02151	1073	1970	1133	1202	1649	1004	341	598	380	745	613	713			744	640	625	274	842	123	739	752	658	612	473	294	950	997
firstTileUTR_02152	4336	8178	6962	5307	5852	5299	2742	3384	2510	2542	2492	2602			3840	3885	2702	3386	3679	1433	3810	4243	3953	3693	2099	1386	4263	3526
firstTileUTR_02153	5807	8283	8603	6951	6462	4753	2916	4086	3192	3080	2796	3190			3818	4283	3862	3769	4403	886	4627	4669	4842	4817	2676	1691	5189	4383
firstTileUTR_02154	5248	9934	8480	7736	7066	4998	3007	2871	2542	3582	2952	3230			3531	3450	3382	3298	5189	1475	4340	4082	4536	4474	2586	1711	4936	4166
firstTileUTR_02155	6493	10544	10345	7038	8761	6255	3336	4499	3588	3849	3070	3310			5116	3857	4339	4164	5255	1552	5375	5828	5367	5563	2893	1809	5392	4738
firstTileUTR_02156	152	214	45	54	115	50	61	119	91	39	76	76			201	44	0	0	107	0	80	60	103	74	61	34	105	122
firstTileUTR_02157	128	153	111	48	108	94	121	83	79	26	23	41			115	0	100	1	70	0	95	132	72	61	20	13	69	59
firstTileUTR_02158	35	135	47	0	34	27	44	9	1	0	37	49			95	71	122	89	25	0	31	90	44	80	13	17	55	51
firstTileUTR_02159	12	46	99	0	13	0	0	0	0	0	17	16			72	0	0	0	50	0	22	27	36	11	20	6	32	40
firstTileUTR_02160	612	1362	404	560	606	505	478	219	391	513	357	369			1609	419	630	762	791	213	1135	1082	896	890	493	341	1022	836
firstTileUTR_02161	333	321	403	583	369	347	110	229	135	408	220	280			578	291	376	756	646	78	610	666	578	514	334	208	725	487
firstTileUTR_02162	5131	9171	7539	6484	7012	5399	3758	3177	2832	2768	2654	3065			4654	4592	3908	2635	5570	1277	5565	5934	4968	5102	3237	1931	6692	5690
firstTileUTR_02163	4506	7685	7205	7010	7269	6201	3226	3632	3096	3100	2773	3248			5314	4094	4498	3907	5856	2061	5700	5721	5219	5224	3196	2062	6742	5722
firstTileUTR_02164	5894	10765	9876	8015	6956	7484	4632	4199	3140	3643	3460	3922			5267	6063	5942	4964	5444	2663	6547	6530	5507	5542	3805	2459	7660	6734
firstTileUTR_02165	6112	10766	10653	7100	8828	8874	4046	4270	3764	3720	3408	3820			4493	5644	5927	4767	6130	1989	5945	6219	5529	5949	3536	2227	7482	6567
firstTileUTR_02166	4654	8645	7890	5484	7540	4928	2460	2829	2339	3149	2485	2777			1193	2507	1305	1425	1797	559	1714	1781	2166	1856	930	719	1783	1544
firstTileUTR_02167	4603	7459	6438	5029	5928	5715	2867	3194	2165	2010	2357	2597			1984	1649	1251	1284	1782	736	1643	1646	1863	2011	989	765	1937	1568
firstTileUTR_02168	3571	6339	5020	4796	4349	3930	2455	2552	2010	1886	2108	2279			1828	1121	772	2111	1398	459	1467	1418	1695	1706	902	682	1567	1358
firstTileUTR_02169	4500	6647	5688	4827	5037	4175	2807	2970	2259	2044	1952	2276			1780	1280	771	1158	1728	740	1605	1564	1806	1818	793	576	1435	1212
firstTileUTR_02170	4233	7085	7344	3807	6244	5265	2967	2642	2205	2666	2068	2220			2308	1640	1045	1861	1679	869	1716	1830	2291	2048	934	716	1742	1423
firstTileUTR_02171	5398	10102	9094	5448	6928	5802	3386	3954	3180	3101	2772	2949			4463	2990	1859	2668	3179	1402	3072	3212	3699	3407	1715	1117	3256	2866
firstTileUTR_02172	5925	7460	7799	6834	6876	5786	3204	3122	2730	2629	2799	2859			3770	2722	1542	3006	2767	1408	3248	3394	3059	2928	2025	1254	3913	3255
firstTileUTR_02173	4401	7279	5792	5872	5685	4031	2535	2648	2380	2943	2616	2888			1666	2464	1416	1791	2523	965	2456	2256	2506	2640	1598	1068	2919	2549
firstTileUTR_02174	4473	6797	6708	5051	4980	4690	2185	3025	2078	2171	2535	2602			2500	2306	1551	1842	2082	519	2363	2261	2260	2265	1480	1019	2806	2445
firstTileUTR_02175	4778	7702	7708	6573	6028	5440	3556	3698	2582	2391	3090	3004			2280	2995	1996	2750	3059	1273	2815	2986	2978	2855	1622	1064	3134	2604
firstTileUTR_02176	5182	7817	7486	6765	7568	5746	2808	3832	3019	2886	3059	3268			3758	3080	1669	2129	2900	1238	2966	2889	3101	3049	1867	1172	3516	3121
firstTileUTR_02177	4739	6509	7348	4566	5206	3906	2769	2622	2374	2610	2246	2227			1517	1657	2352	1893	2716	764	2441	2417	2550	2680	1616	1005	2939	2505
firstTileUTR_02178	6154	12835	10238	7200	8621	7654	4196	4732	4289	3826	3364	3657			9122	10601	7706	8557	11774	2623	10790	11049	9322	9032	6077	3513	11661	9835
firstTileUTR_02179	3972	7713	6629	4956	5094	4442	2485	2218	2230	2531	2103	2397			5285	5904	5472	4353	7023	1632	6648	6867	6180	5872	4030	2473	7187	6563
firstTileUTR_02180	7001	11550	10217	7535	9169	7439	3540	3645	3691	3718	3111	3532			10667	12067	11678	9123	11915	4014	12196	13025	10663	10722	6362	3784	10910	9638
firstTileUTR_02181	5231	9367	8848	6654	7507	6938	2969	3261	2719	3359	2839	3206			9321	9165	9488	8190	10461	3100	10501	11319	10378	10287	6230	3506	10605	9374
firstTileUTR_02184	70	178	147	394	168	142	40	98	106	88	58	80			0	176	177	188	168	68	165	107	155	178	102	63	183	173
firstTileUTR_02185	52	567	61	265	280	186	120	74	75	47	93	102			0	170	141	170	222	40	150	176	212	193	111	50	242	151
firstTileUTR_02186	317	475	135	70	355	174	103	50	76	26	88	103			60	175	62	46	164	114	192	209	197	138	102	65	212	181
firstTileUTR_02187	127	308	473	312	180	282	70	105	32	35	70	90			117	180	21	43	193	43	197	208	251	234	99	59	171	154
firstTileUTR_02188	0	0	86	79	0	0	0	15	0	0	7	13			0	0	0	0	0	0	0	2	0	0	11	10	36	33
firstTileUTR_02189	46	0	0	0	7	0	0	36	0	53	6	1			8	19	42	76	57	9	53	22	22	10	3	5	1	0
firstTileUTR_02190	56	63	71	21	23	0	2	31	0	0	22	18			0	45	65	0	1	0	45	83	10	33	16	10	20	42
firstTileUTR_02191	0	0	0	0	31	0	0	0	0	0	12	11			138	24	0	0	44	0	25	35	8	13	23	11	49	42
firstTileUTR_02192	19	0	27	27	22	0	0	0	0	0	0	0			75	0	0	0	19	40	13	25	13	17	1	0	2	0
[truncated: 4,464 more rows]

## Sheet: Upstream
oligoID	DNA_UpStream_1	DNA_UpStream_November2016_upstream_2018_2	DNA_UpStream_November2016_upstream_2018_3	DNA_UpStream_November2016_upstream_2018_4	DNA_UpStream_A	DNA_UpStream_B	RNA_UpStream_1	RNA_UpStream_November2016_upstream_2018_2	RNA_UpStream_November2016_upstream_2018_3	RNA_UpStream_November2016_upstream_2018_4	RNA_UpStream_A	RNA_UpStream_B
singleVariantTiles_00005	167		89		99	90	113	91	90	63	114	148
singleVariantTiles_00006	136		100		74	82	81	122	102	95	101	136
singleVariantTiles_00023	712		506		529	536	746	721	728	620	1101	1526
singleVariantTiles_00024	614		443		461	446	619	705	581	490	1195	1563
singleVariantTiles_00025	3		4		2	6	0	1	1	0	2	1
singleVariantTiles_00026	13		2		7	0	2	1	0	2	4	2
singleVariantTiles_00027	340		275		263	238	135	172	156	134	133	210
singleVariantTiles_00028	382		260		270	244	156	174	167	123	125	145
singleVariantTiles_00029	1340		1118		880	834	484	553	588	502	316	406
singleVariantTiles_00030	1382		1157		1020	824	567	656	577	612	345	418
singleVariantTiles_00031	0		3		2	1	0	3	4	2	4	3
singleVariantTiles_00032	1		2		4	0	6	11	7	1	5	2
singleVariantTiles_00043	1338		946		948	836	221	232	214	266	249	329
singleVariantTiles_00044	1693		1259		1178	964	337	337	377	346	355	428
singleVariantTiles_00049	96		79		54	71	23	31	27	31	28	28
singleVariantTiles_00050	141		123		94	92	33	30	35	36	34	48
singleVariantTiles_00051	74		62		55	48	12	3	13	5	13	20
singleVariantTiles_00052	86		78		71	63	11	20	15	11	6	15
singleVariantTiles_00053	91		79		43	68	10	11	12	10	15	16
singleVariantTiles_00054	66		65		73	44	14	10	17	11	12	18
singleVariantTiles_00055	87		52		70	40	20	29	15	18	8	10
singleVariantTiles_00056	109		72		77	55	31	32	28	28	30	21
singleVariantTiles_00063	1538		1092		996	941	512	538	469	613	324	407
singleVariantTiles_00064	1703		1284		1144	1021	594	677	565	652	387	486
singleVariantTiles_00065	1857		1454		1231	1141	757	898	790	810	611	721
singleVariantTiles_00066	1513		1224		1165	1102	622	685	710	626	588	618
singleVariantTiles_00067	1244		805		788	727	311	353	272	325	252	320
singleVariantTiles_00068	1178		872		864	733	289	349	301	292	302	297
singleVariantTiles_00069	46		13		13	23	7	12	17	14	4	6
singleVariantTiles_00070	22		11		23	12	12	4	5	3	2	5
singleVariantTiles_00105	220		188		149	183	33	31	23	17	37	40
singleVariantTiles_00106	267		247		162	133	29	32	45	38	27	56
singleVariantTiles_00107	443		366		380	275	282	336	292	260	290	372
singleVariantTiles_00108	453		328		337	338	425	463	399	316	575	663
singleVariantTiles_00111	628		460		467	375	183	223	189	187	93	145
singleVariantTiles_00112	651		475		460	398	206	205	173	206	92	147
singleVariantTiles_00151	253		193		167	138	107	110	104	102	72	118
singleVariantTiles_00152	255		197		182	162	96	150	134	101	88	132
singleVariantTiles_00159	40		19		23	29	20	32	18	17	33	59
singleVariantTiles_00160	22		25		18	14	13	10	17	10	14	18
singleVariantTiles_00167	52		55		50	29	7	22	5	13	4	10
singleVariantTiles_00168	35		32		19	20	2	9	5	6	4	5
singleVariantTiles_00187	583		451		438	412	385	447	393	404	392	429
singleVariantTiles_00188	704		556		523	488	477	545	388	419	490	576
singleVariantTiles_00201	715		631		511	516	225	277	239	232	110	171
singleVariantTiles_00202	672		464		394	354	210	183	153	202	96	124
singleVariantTiles_00207	377		302		297	267	515	595	550	503	607	712
singleVariantTiles_00208	443		312		304	244	580	654	476	604	660	761
singleVariantTiles_00211	753		564		501	526	67	73	61	78	89	84
singleVariantTiles_00212	632		488		452	420	61	48	53	50	60	68
singleVariantTiles_00213	918		771		678	655	309	376	343	348	271	395
singleVariantTiles_00214	912		707		600	502	359	350	339	297	281	381
singleVariantTiles_00221	3206		2431		2205	1906	549	714	614	702	430	568
singleVariantTiles_00222	2776		1932		1801	1606	347	432	342	398	324	392
singleVariantTiles_00227	62		34		33	26	10	13	5	13	5	17
singleVariantTiles_00228	39		24		20	38	8	15	8	15	6	13
singleVariantTiles_00247	406		329		309	237	86	89	101	105	59	64
singleVariantTiles_00248	363		314		267	238	103	137	104	110	68	87
singleVariantTiles_00249	301		323		263	193	58	94	107	76	46	69
singleVariantTiles_00250	337		253		283	224	63	59	59	65	53	47
singleVariantTiles_00257	87		75		58	52	30	41	40	29	21	25
singleVariantTiles_00258	51		27		42	42	25	25	13	41	18	25
singleVariantTiles_00271	1406		1145		1035	951	148	200	168	189	212	276
singleVariantTiles_00272	1351		1005		856	805	162	177	172	170	216	343
singleVariantTiles_00277	1		0		0	0	0	0	0	0	0	0
singleVariantTiles_00278	1		3		0	1	0	0	0	1	0	0
singleVariantTiles_00279	555		559		489	402	122	161	121	145	189	239
singleVariantTiles_00280	707		533		523	423	124	129	110	175	195	255
singleVariantTiles_00293	226		146		156	135	475	491	534	410	583	672
singleVariantTiles_00294	196		151		180	142	499	628	585	444	625	713
singleVariantTiles_00305	4		6		2	0	6	7	7	10	5	5
singleVariantTiles_00306	28		8		10	6	41	15	10	9	16	11
singleVariantTiles_00307	74		69		71	54	221	232	210	205	210	201
singleVariantTiles_00308	88		70		36	69	152	166	191	180	171	181
singleVariantTiles_00387	278		240		207	181	46	35	34	37	32	70
singleVariantTiles_00388	410		311		283	265	46	37	52	45	55	44
singleVariantTiles_00405	904		719		638	486	150	189	183	157	125	153
singleVariantTiles_00406	809		640		542	539	135	166	166	127	123	143
singleVariantTiles_00411	196		166		155	152	51	43	51	64	54	68
singleVariantTiles_00412	346		201		136	178	71	79	54	97	47	87
singleVariantTiles_00413	1536		1130		976	963	1691	1767	1535	1618	1957	2150
singleVariantTiles_00414	1420		1117		949	973	1634	1822	1594	1683	2184	2400
singleVariantTiles_00415	514		417		370	347	305	376	300	358	295	385
singleVariantTiles_00416	593		437		410	359	461	413	399	420	404	450
singleVariantTiles_00417	215		189		165	124	60	64	59	56	35	34
singleVariantTiles_00418	207		186		136	118	48	46	53	54	25	28
singleVariantTiles_00423	9		11		8	0	2	11	3	0	2	3
singleVariantTiles_00424	6		1		5	1	1	3	2	0	2	1
singleVariantTiles_00431	18		20		17	10	2	8	4	3	2	5
singleVariantTiles_00432	13		14		13	10	1	2	2	0	2	5
singleVariantTiles_00447	789		675		571	541	1024	1086	1181	1205	1127	1402
singleVariantTiles_00448	645		455		481	490	735	883	704	680	1014	1063
singleVariantTiles_00453	1703		1309		1206	1110	169	180	173	183	186	265
singleVariantTiles_00454	1353		962		916	751	123	144	130	144	142	213
singleVariantTiles_00455	1153		917		807	744	115	140	137	147	125	251
singleVariantTiles_00456	1210		935		832	787	146	176	152	133	160	319
singleVariantTiles_00463	284		232		201	181	82	102	62	83	38	64
singleVariantTiles_00464	356		257		233	160	97	118	95	78	56	65
singleVariantTiles_00465	710		509		519	411	225	228	188	203	158	180
singleVariantTiles_00466	691		570		438	360	130	169	138	121	98	126
singleVariantTiles_00467	406		312		283	225	47	48	52	55	43	56
singleVariantTiles_00468	403		299		278	240	48	55	49	66	64	61
singleVariantTiles_00471	210		154		119	97	44	54	63	46	22	49
singleVariantTiles_00472	170		128		103	80	32	44	45	42	34	27
singleVariantTiles_00473	318		254		245	178	87	127	97	85	40	65
singleVariantTiles_00474	419		283		285	205	134	110	99	111	52	81
singleVariantTiles_00499	4		5		3	5	5	2	6	2	1	2
singleVariantTiles_00500	3		2		1	0	1	0	1	1	0	1
singleVariantTiles_00503	227		180		138	121	41	46	45	45	44	31
singleVariantTiles_00504	218		210		171	133	64	46	102	95	73	89
singleVariantTiles_00507	1196		942		832	734	305	352	299	297	209	307
singleVariantTiles_00508	1564		1202		1064	961	393	420	402	374	273	349
singleVariantTiles_00515	1926		1347		1281	1129	425	521	444	457	393	569
singleVariantTiles_00516	1451		1243		1176	1016	411	532	436	417	381	542
singleVariantTiles_00533	487		357		365	260	119	138	91	97	71	65
singleVariantTiles_00534	399		293		245	265	77	80	81	75	38	48
singleVariantTiles_00537	525		380		351	268	183	239	162	188	55	101
singleVariantTiles_00538	527		425		341	277	166	174	196	187	106	99
singleVariantTiles_00549	2017		1577		1468	1227	553	657	648	636	326	447
singleVariantTiles_00550	2127		1609		1365	1231	679	688	564	624	344	443
singleVariantTiles_00551	1912		1481		1307	1152	451	553	488	517	277	368
singleVariantTiles_00552	2160		1724		1545	1233	612	766	663	648	389	489
singleVariantTiles_00559	613		424		366	334	103	88	85	90	83	117
singleVariantTiles_00560	617		456		403	364	90	108	117	97	95	134
singleVariantTiles_00579	746		483		413	360	170	124	119	114	73	85
singleVariantTiles_00580	722		528		487	424	160	175	122	168	72	110
singleVariantTiles_00599	279		166		188	165	69	102	80	84	50	62
singleVariantTiles_00600	258		216		241	159	91	90	108	100	68	62
singleVariantTiles_00613	350		294		288	249	93	119	130	102	70	85
singleVariantTiles_00614	153		123		117	87	61	57	44	59	25	40
singleVariantTiles_00618	0		0		0	0	0	1	0	0	0	0
singleVariantTiles_00635	371		257		225	205	146	164	113	137	76	93
singleVariantTiles_00636	380		252		256	249	151	152	138	150	83	112
singleVariantTiles_00647	118		89		86	68	24	30	29	29	12	23
singleVariantTiles_00648	147		119		83	58	36	44	28	45	11	21
singleVariantTiles_00649	195		132		137	110	32	32	34	40	16	21
singleVariantTiles_00650	238		181		162	154	48	33	51	48	28	41
singleVariantTiles_00657	77		45		42	52	26	29	15	15	23	64
singleVariantTiles_00658	113		82		73	62	49	52	58	37	56	79
singleVariantTiles_00663	53		38		35	17	21	14	16	12	29	35
singleVariantTiles_00664	41		23		37	41	22	15	11	13	34	46
singleVariantTiles_00665	34		21		22	26	3	10	5	3	3	5
singleVariantTiles_00666	21		28		35	24	4	4	5	6	5	11
singleVariantTiles_00667	15		17		6	8	2	0	2	2	1	4
singleVariantTiles_00668	13		20		11	19	6	4	4	3	4	8
singleVariantTiles_00669	230		180		135	120	68	75	67	79	23	36
singleVariantTiles_00670	247		158		138	136	57	66	62	66	40	61
singleVariantTiles_00671	249		144		150	148	58	51	75	72	36	50
singleVariantTiles_00672	169		126		123	89	67	58	60	88	24	50
singleVariantTiles_00673	1691		1267		1020	1031	547	577	562	518	321	467
singleVariantTiles_00674	2229		1702		1359	1301	782	771	739	719	436	647
singleVariantTiles_00675	2192		1700		1465	1260	402	440	449	377	286	401
singleVariantTiles_00676	1658		1202		1082	1112	262	270	254	280	210	290
singleVariantTiles_00677	1245		990		822	765	180	153	171	186	140	217
singleVariantTiles_00678	1074		742		736	603	145	149	158	104	123	178
singleVariantTiles_00679	1062		754		673	568	353	351	318	295	391	564
singleVariantTiles_00680	1001		766		745	665	374	422	350	307	408	704
singleVariantTiles_00681	272		206		231	213	226	260	212	202	234	414
singleVariantTiles_00682	203		161		126	147	155	201	180	139	181	296
singleVariantTiles_00683	412		316		306	250	255	225	239	173	264	394
singleVariantTiles_00684	392		281		244	250	223	224	258	189	218	379
singleVariantTiles_00685	279		206		193	189	223	228	252	150	186	329
singleVariantTiles_00686	419		322		282	282	293	296	283	265	271	381
singleVariantTiles_00687	502		367		383	354	360	376	323	248	443	789
singleVariantTiles_00688	582		435		450	423	611	663	680	317	856	1620
singleVariantTiles_00689	367		317		257	244	292	327	308	187	413	675
singleVariantTiles_00690	445		351		335	285	254	255	260	207	319	653
singleVariantTiles_00691	556		411		457	377	527	616	540	438	655	1080
singleVariantTiles_00692	581		429		401	401	433	510	404	313	531	987
singleVariantTiles_00693	607		439		392	421	271	218	217	207	211	377
singleVariantTiles_00694	756		548		497	452	366	297	307	238	269	493
singleVariantTiles_00695	417		314		297	289	196	220	173	158	179	273
singleVariantTiles_00696	616		435		443	374	265	275	274	188	242	407
singleVariantTiles_00697	533		421		439	416	212	233	219	206	193	311
singleVariantTiles_00698	512		367		328	336	207	232	172	186	151	311
singleVariantTiles_00699	521		417		334	320	91	110	91	117	61	101
singleVariantTiles_00700	408		274		242	223	71	85	99	81	46	87
singleVariantTiles_00701	290		206		221	169	53	82	65	64	33	57
singleVariantTiles_00702	235		199		145	131	66	67	63	45	21	45
singleVariantTiles_00703	371		240		259	207	51	65	59	68	48	55
singleVariantTiles_00704	353		271		263	176	90	81	85	93	43	53
singleVariantTiles_00705	522		358		379	288	111	122	106	124	68	96
singleVariantTiles_00706	557		433		389	361	147	208	176	136	95	131
singleVariantTiles_00707	662		507		450	404	162	156	148	165	83	135
singleVariantTiles_00708	547		462		425	359	131	194	135	154	106	148
singleVariantTiles_00709	256		174		175	144	57	41	60	53	73	75
singleVariantTiles_00710	168		132		128	108	31	34	42	32	23	37
singleVariantTiles_00711	39		22		32	35	5	5	7	13	5	7
singleVariantTiles_00712	69		24		35	28	8	15	14	13	15	10
singleVariantTiles_00713	12		7		7	2	2	1	2	4	4	1
singleVariantTiles_00714	12		10		15	19	3	5	3	9	4	6
singleVariantTiles_00715	222		170		154	139	77	78	85	119	60	82
singleVariantTiles_00716	224		199		178	180	87	106	123	98	106	119
singleVariantTiles_00717	641		421		411	348	174	205	129	173	189	190
singleVariantTiles_00718	341		280		216	227	84	113	105	103	88	99
singleVariantTiles_00719	2360		1780		1568	1585	1287	1449	1150	1332	1172	2330
singleVariantTiles_00720	2570		1975		1844	1695	1290	1445	1306	1341	1086	2047
singleVariantTiles_00721	2571		1818		1993	1900	1447	1536	1410	1454	1954	3391
singleVariantTiles_00722	1951		1599		1371	1336	831	916	938	868	846	1111
singleVariantTiles_00753	62		73		44	51	18	13	29	16	12	21
singleVariantTiles_00754	76		73		59	46	16	14	17	18	13	8
singleVariantTiles_00771	456		369		302	271	91	151	114	143	76	114
singleVariantTiles_00772	424		400		374	377	85	124	134	130	100	112
singleVariantTiles_00779	520		396		349	319	206	341	270	292	226	246
singleVariantTiles_00780	495		441		351	349	232	307	251	256	222	209
singleVariantTiles_00781	763		633		601	573	400	465	423	424	338	388
singleVariantTiles_00782	897		719		638	584	488	498	496	444	379	453
singleVariantTiles_00785	312		253		244	246	137	167	132	169	141	157
singleVariantTiles_00786	168		103		69	83	85	67	83	78	59	60
singleVariantTiles_00821	1563		1191		1062	1065	875	1033	839	912	774	727
singleVariantTiles_00822	1304		964		874	845	490	574	533	533	393	386
singleVariantTiles_00825	726		495		438	425	80	99	67	79	80	96
singleVariantTiles_00826	665		573		488	417	73	74	80	77	90	122
singleVariantTiles_00829	540		396		399	361	54	78	72	63	102	120
singleVariantTiles_00830	610		450		408	376	74	69	75	69	98	129
singleVariantTiles_00833	335		258		207	194	73	85	59	81	39	59
singleVariantTiles_00834	266		224		200	168	85	101	105	95	45	74
singleVariantTiles_00837	705		567		473	390	160	230	137	188	104	123
singleVariantTiles_00838	717		580		513	436	164	203	128	192	96	146
singleVariantTiles_00839	322		224		194	150	77	50	57	62	29	63
singleVariantTiles_00840	320		207		163	185	106	100	58	83	31	49
singleVariantTiles_00849	827		581		569	490	281	314	305	342	133	219
singleVariantTiles_00850	498		391		291	249	184	198	187	180	71	98
singleVariantTiles_00883	311		234		220	183	108	106	113	87	137	142
singleVariantTiles_00884	244		207		194	116	43	55	64	48	43	65
singleVariantTiles_00891	1304		1039		976	930	1054	1170	1010	1069	1687	1840
singleVariantTiles_00892	1084		977		877	913	1109	1313	1300	1089	1838	1833
singleVariantTiles_00917	520		402		381	365	156	216	142	143	219	250
singleVariantTiles_00918	430		294		300	235	149	137	120	98	172	194
singleVariantTiles_00935	371		280		235	226	165	130	125	122	165	184
singleVariantTiles_00936	474		340		330	297	219	269	191	195	228	273
singleVariantTiles_00943	759		627		630	537	523	525	582	454	750	1170
singleVariantTiles_00944	620		494		423	501	351	415	430	392	575	768
singleVariantTiles_00993	23		21		20	4	1	4	7	5	1	3
singleVariantTiles_00994	24		35		23	19	5	17	11	11	4	12
singleVariantTiles_00995	365		338		285	242	58	78	80	56	36	50
singleVariantTiles_00996	403		261		245	209	78	57	58	53	27	46
singleVariantTiles_01005	434		334		322	247	113	123	115	141	34	75
singleVariantTiles_01006	512		387		356	346	137	146	147	129	50	104
singleVariantTiles_01013	1061		908		727	645	375	439	391	361	162	252
singleVariantTiles_01014	1159		846		814	765	397	412	308	352	164	273
singleVariantTiles_01021	270		230		208	189	226	191	199	231	255	307
singleVariantTiles_01022	213		213		198	174	144	119	172	142	207	221
singleVariantTiles_01023	26		29		23	48	30	32	28	61	30	46
singleVariantTiles_01024	81		74		67	49	59	92	57	91	65	72
singleVariantTiles_01025	184		175		125	148	59	65	56	60	32	33
singleVariantTiles_01026	271		165		136	118	83	58	55	73	26	33
singleVariantTiles_01043	49		60		35	17	11	21	24	9	9	20
singleVariantTiles_01044	61		52		45	46	27	28	33	25	10	20
singleVariantTiles_01049	953		685		606	555	261	318	272	338	161	195
singleVariantTiles_01050	793		666		630	469	244	323	277	288	163	215
singleVariantTiles_01051	546		410		383	362	125	153	108	127	108	121
singleVariantTiles_01052	464		315		326	298	120	147	112	117	84	117
singleVariantTiles_01069	1639		1202		1223	1023	496	583	529	603	314	454
singleVariantTiles_01070	1509		1240		1166	1021	501	606	465	501	344	395
singleVariantTiles_01077	443		379		316	260	303	425	373	403	340	313
singleVariantTiles_01078	372		333		308	262	299	326	389	341	375	317
singleVariantTiles_01097	297		247		229	214	93	100	100	100	92	135
singleVariantTiles_01098	266		215		208	204	83	103	78	67	68	89
singleVariantTiles_01099	367		263		287	272	597	658	650	661	605	538
singleVariantTiles_01100	404		312		253	289	697	705	622	678	519	641
singleVariantTiles_01105	885		576		518	458	294	301	265	327	156	206
singleVariantTiles_01106	946		673		614	531	288	357	335	368	201	231
singleVariantTiles_01111	1599		1160		1022	1106	1306	1429	1218	1065	1232	1769
singleVariantTiles_01112	1540		1189		1080	958	1204	1503	1293	1014	1240	1617
singleVariantTiles_01141	1284		950		853	761	259	278	205	251	217	255
singleVariantTiles_01142	1084		814		755	678	184	202	179	192	184	186
singleVariantTiles_01159	50		55		45	62	18	19	22	21	14	29
singleVariantTiles_01160	100		37		46	64	39	29	19	23	20	25
singleVariantTiles_01163	259		242		185	189	100	109	95	85	51	68
singleVariantTiles_01164	319		226		207	144	115	128	110	110	72	81
singleVariantTiles_01165	16		12		8	7	5	6	3	1	1	1
singleVariantTiles_01166	9		11		6	7	4	8	1	5	2	6
singleVariantTiles_01169	315		299		299	257	241	257	292	226	344	319
singleVariantTiles_01170	306		180		193	205	237	241	185	221	286	312
singleVariantTiles_01173	510		340		378	286	192	213	182	200	71	128
singleVariantTiles_01174	474		355		378	277	165	229	152	216	85	134
singleVariantTiles_01177	57		44		36	57	34	51	58	55	95	84
singleVariantTiles_01178	94		74		69	51	96	87	70	81	121	119
singleVariantTiles_01183	3		6		1	3	2	0	2	0	0	0
singleVariantTiles_01184	4		6		3	4	0	1	2	4	2	3
singleVariantTiles_01185	1770		1434		1468	1205	4158	5011	4728	4422	4669	5238
singleVariantTiles_01186	1821		1349		1349	1286	4492	4667	4658	4487	4448	5477
singleVariantTiles_01187	478		346		326	266	151	162	153	145	70	94
singleVariantTiles_01188	511		363		322	272	120	170	137	143	66	101
singleVariantTiles_01189	673		435		446	395	256	275	213	244	128	157
singleVariantTiles_01190	655		468		399	431	230	264	238	283	105	181
singleVariantTiles_01191	1585		1181		1075	983	473	530	474	492	238	305
singleVariantTiles_01192	1606		1291		1080	983	505	557	530	512	241	296
singleVariantTiles_01193	25		20		16	18	4	10	3	8	5	7
singleVariantTiles_01194	18		8		3	5	2	3	2	8	4	3
singleVariantTiles_01195	192		128		105	140	93	64	66	90	104	115
singleVariantTiles_01196	148		147		112	103	45	63	54	56	80	74
singleVariantTiles_01197	1321		1144		923	840	330	314	299	244	282	325
singleVariantTiles_01198	1194		1021		864	733	275	282	250	196	308	309
singleVariantTiles_01199	159		132		146	96	39	31	42	30	35	36
singleVariantTiles_01200	158		108		109	91	24	40	29	43	46	45
singleVariantTiles_01201	33		20		21	30	10	13	13	22	6	10
singleVariantTiles_01202	23		15		29	26	10	10	19	6	12	18
singleVariantTiles_01203	68		59		44	45	18	24	22	14	4	12
singleVariantTiles_01204	51		48		34	29	12	20	17	20	7	12
singleVariantTiles_01213	210		143		114	98	98	106	104	82	87	100
singleVariantTiles_01214	200		133		116	122	86	93	90	78	89	72
singleVariantTiles_01219	59		60		57	52	5	7	13	10	8	21
singleVariantTiles_01220	70		58		34	29	10	8	19	6	8	19
singleVariantTiles_01227	887		701		674	611	191	216	155	198	135	181
singleVariantTiles_01228	748		552		506	461	120	185	136	154	107	179
singleVariantTiles_01233	13		1		2	4	4	2	0	1	0	0
singleVariantTiles_01234	11		3		4	0	1	1	1	0	0	0
singleVariantTiles_01247	756		520		493	498	312	303	260	332	153	244
singleVariantTiles_01248	619		447		394	387	210	257	214	202	127	164
singleVariantTiles_01255	2		1		1	0	2	0	2	1	1	2
singleVariantTiles_01256	124		107		97	122	99	131	112	134	120	78
singleVariantTiles_01257	391		263		276	226	302	312	298	252	289	277
singleVariantTiles_01258	372		292		291	235	278	289	295	260	286	268
singleVariantTiles_01259	1008		729		601	547	358	402	321	412	230	260
singleVariantTiles_01260	649		611		580	525	238	279	271	294	136	252
singleVariantTiles_01261	1137		836		827	725	400	456	437	445	206	292
singleVariantTiles_01262	1108		876		644	572	371	397	402	381	213	311
singleVariantTiles_01263	155		115		97	109	46	79	52	45	27	30
singleVariantTiles_01264	280		193		215	158	104	113	95	87	37	63
singleVariantTiles_01265	1033		797		720	655	340	416	367	384	192	270
singleVariantTiles_01266	914		759		667	573	334	345	280	313	176	227
singleVariantTiles_01267	545		437		466	334	156	201	178	225	85	115
singleVariantTiles_01268	662		509		462	426	187	250	205	229	110	155
singleVariantTiles_01271	2081		1585		1396	1400	807	954	866	895	692	756
singleVariantTiles_01272	2544		1968		1683	1510	1050	1115	1045	978	907	945
singleVariantTiles_01273	55		82		67	46	30	57	32	43	32	37
singleVariantTiles_01274	64		70		46	52	36	30	25	31	31	35
singleVariantTiles_01275	257		189		165	136	153	137	151	127	147	148
singleVariantTiles_01276	225		172		172	155	175	153	172	149	138	144
singleVariantTiles_01277	889		668		537	508	222	247	232	262	267	288
singleVariantTiles_01278	2285		1607		1436	1379	636	674	614	663	644	705
singleVariantTiles_01279	390		327		248	238	177	214	189	144	165	210
singleVariantTiles_01280	280		186		167	163	110	138	124	141	123	135
singleVariantTiles_01281	1748		1429		1336	1093	1220	1332	1412	1358	1301	1345
singleVariantTiles_01282	1452		1163		927	896	967	1175	1037	1047	975	991
singleVariantTiles_01283	198		168		152	146	144	232	217	196	201	227
singleVariantTiles_01284	211		169		141	142	215	265	240	217	187	194
singleVariantTiles_01285	509		354		348	321	299	302	272	245	262	222
singleVariantTiles_01286	391		299		269	242	197	282	217	170	204	202
singleVariantTiles_01287	983		702		688	603	781	800	802	864	772	764
singleVariantTiles_01288	776		566		552	499	594	720	678	684	668	649
singleVariantTiles_01289	86		101		65	49	62	126	101	95	93	79
singleVariantTiles_01290	86		88		55	53	87	98	96	61	85	118
singleVariantTiles_01305	1146		871		841	791	594	793	704	779	741	768
singleVariantTiles_01306	1289		976		793	815	613	752	654	683	731	753
singleVariantTiles_01307	82		61		28	31	49	68	46	27	45	41
singleVariantTiles_01308	40		46		37	43	18	39	30	60	32	48
singleVariantTiles_01311	428		320		274	237	345	353	345	319	328	351
singleVariantTiles_01312	317		266		238	282	215	310	264	217	246	303
singleVariantTiles_01317	19		37		13	24	33	17	51	11	28	34
singleVariantTiles_01318	9		13		14	5	13	37	18	48	7	19
singleVariantTiles_01407	420		367		283	274	181	190	155	161	102	110
singleVariantTiles_01408	660		444		410	383	179	272	216	229	122	156
singleVariantTiles_01409	3		6		9	1	2	2	1	0	0	0
singleVariantTiles_01410	28		13		20	34	11	11	7	5	12	12
singleVariantTiles_01411	20		17		21	26	9	13	9	8	8	6
singleVariantTiles_01412	50		29		22	16	9	16	10	16	5	7
singleVariantTiles_01413	1606		1328		1218	1046	583	725	668	715	516	698
singleVariantTiles_01414	1725		1228		1288	1115	591	713	604	679	641	828
singleVariantTiles_01415	449		336		342	303	113	165	111	142	94	166
singleVariantTiles_01416	434		360		364	375	131	159	130	119	86	189
singleVariantTiles_01417	697		502		493	422	180	186	159	169	166	210
singleVariantTiles_01418	449		364		308	277	138	160	97	99	112	195
singleVariantTiles_01419	815		640		563	543	714	714	669	812	721	746
singleVariantTiles_01420	673		467		485	416	523	593	498	549	643	651
singleVariantTiles_01433	256		183		171	135	147	161	119	144	165	151
singleVariantTiles_01434	238		196		173	157	121	144	123	111	127	150
singleVariantTiles_01435	386		259		276	187	230	287	276	239	305	226
singleVariantTiles_01436	329		247		190	169	208	210	211	227	193	266
singleVariantTiles_01437	299		228		173	164	77	84	69	83	35	47
singleVariantTiles_01438	233		223		197	192	70	72	52	52	27	40
singleVariantTiles_01443	418		371		293	269	78	113	97	93	71	63
singleVariantTiles_01444	440		310		286	242	162	133	139	137	80	130
singleVariantTiles_01445	5524		4390		3872	3457	1611	1775	1689	1691	1237	1388
singleVariantTiles_01446	4641		3603		3292	3053	1310	1512	1330	1457	968	1160
singleVariantTiles_01455	751		486		449	404	60	53	56	88	73	82
singleVariantTiles_01456	761		598		574	534	88	60	69	91	70	86
singleVariantTiles_01457	228		213		166	153	78	94	78	86	74	95
singleVariantTiles_01458	278		216		194	206	92	93	84	110	82	129
singleVariantTiles_01459	1645		1367		1189	1075	565	700	518	563	385	567
singleVariantTiles_01460	1792		1197		1239	1074	533	552	519	626	367	475
singleVariantTiles_01461	1159		948		772	807	330	343	373	378	196	289
singleVariantTiles_01462	1330		928		909	800	369	451	380	360	234	344
singleVariantTiles_01463	2664		2096		1890	1893	643	802	661	647	485	722
singleVariantTiles_01464	2385		1861		1799	1641	585	739	631	659	453	625
singleVariantTiles_01465	1093		825		762	621	420	486	463	507	219	287
singleVariantTiles_01466	1323		911		922	747	529	624	473	550	262	332
singleVariantTiles_01467	679		571		463	453	502	528	495	566	505	475
singleVariantTiles_01468	1275		791		862	815	858	921	798	769	835	797
singleVariantTiles_01469	445		406		352	282	411	495	496	572	501	512
singleVariantTiles_01470	658		438		383	338	693	662	568	644	617	666
singleVariantTiles_01471	153		107		109	83	27	25	28	39	18	28
singleVariantTiles_01472	92		84		63	70	30	27	21	20	17	25
singleVariantTiles_01477	334		303		274	226	143	177	160	155	141	184
singleVariantTiles_01478	309		258		279	259	136	140	175	136	215	188
singleVariantTiles_01483	318		185		225	212	198	249	181	175	204	233
singleVariantTiles_01484	371		309		283	234	216	267	279	300	180	248
singleVariantTiles_01487	444		329		246	227	33	34	39	47	31	34
singleVariantTiles_01488	426		287		259	229	26	32	27	39	22	33
singleVariantTiles_01489	741		605		576	515	194	266	193	252	99	150
singleVariantTiles_01490	285		189		156	152	85	76	86	110	37	55
singleVariantTiles_01491	344		259		277	226	187	246	183	169	220	301
singleVariantTiles_01492	250		186		164	157	107	185	119	130	189	269
singleVariantTiles_01493	6823		5205		4914	4705	4720	5123	4709	5110	5730	6123
singleVariantTiles_01494	6920		5227		4934	4239	3732	4151	3920	4101	3868	3892
singleVariantTiles_01495	415		314		283	300	101	121	132	84	81	121
singleVariantTiles_01496	292		222		228	188	64	96	64	82	50	70
singleVariantTiles_01521	255		204		160	140	80	84	102	84	77	82
singleVariantTiles_01522	283		207		157	170	113	119	92	113	74	118
singleVariantTiles_01541	110		59		76	49	13	28	15	18	8	16
singleVariantTiles_01542	50		56		61	43	12	14	19	8	7	12
singleVariantTiles_01551	4		0		2	5	2	4	3	1	1	3
singleVariantTiles_01563	230		202		178	182	39	61	52	53	37	37
singleVariantTiles_01564	247		187		150	123	51	61	56	62	31	36
singleVariantTiles_01585	2218		1708		1628	1432	245	266	253	258	252	302
singleVariantTiles_01586	2195		1765		1516	1389	222	238	224	227	180	248
singleVariantTiles_01605	530		463		379	356	423	527	509	460	475	461
singleVariantTiles_01606	711		477		455	466	570	555	536	607	481	602
singleVariantTiles_01607	3319		2489		2345	2273	8114	8392	8439	9367	9458	9409
singleVariantTiles_01608	3137		2396		2384	2186	7532	8951	7803	8839	9095	8772
singleVariantTiles_01609	473		421		361	314	191	202	176	195	197	330
singleVariantTiles_01610	504		360		330	319	199	201	205	176	207	331
singleVariantTiles_01611	104		62		57	48	11	15	18	10	17	17
singleVariantTiles_01612	23		31		27	22	5	8	8	8	7	7
singleVariantTiles_01613	94		78		52	74	34	27	54	31	39	50
singleVariantTiles_01614	40		32		21	24	19	9	14	12	8	21
singleVariantTiles_01615	95		83		74	58	28	25	27	18	26	36
singleVariantTiles_01616	65		59		62	53	13	16	15	15	14	16
singleVariantTiles_01617	51		50		33	36	10	11	10	10	15	15
singleVariantTiles_01618	59		44		26	25	15	9	15	13	7	12
singleVariantTiles_01619	495		348		354	364	213	205	208	233	195	268
singleVariantTiles_01620	521		418		361	354	196	197	213	209	219	239
singleVariantTiles_01621	406		294		360	305	217	248	217	219	243	195
singleVariantTiles_01622	437		350		278	295	183	196	209	190	181	191
singleVariantTiles_01623	643		576		495	434	265	350	272	276	248	282
singleVariantTiles_01624	638		445		441	400	236	293	246	280	248	274
singleVariantTiles_01637	30		21		14	21	33	26	29	19	16	29
singleVariantTiles_01638	33		19		32	30	21	45	22	59	26	38
singleVariantTiles_01677	16		21		9	9	8	2	7	2	1	2
singleVariantTiles_01678	11		7		4	9	1	4	2	4	3	2
singleVariantTiles_01679	152		93		94	69	35	39	31	37	22	37
singleVariantTiles_01680	126		99		50	85	27	28	33	15	13	26
singleVariantTiles_01685	689		565		546	432	469	554	464	276	478	1074
singleVariantTiles_01686	589		569		563	551	448	528	464	264	449	1068
singleVariantTiles_01687	164		112		87	126	136	102	92	61	89	245
singleVariantTiles_01688	68		66		68	32	47	58	50	19	40	106
singleVariantTiles_01689	355		221		234	226	107	145	109	121	57	98
singleVariantTiles_01690	397		305		243	229	144	140	132	144	72	101
singleVariantTiles_01693	16		17		18	18	13	13	11	18	9	28
singleVariantTiles_01694	18		15		8	14	4	9	3	0	9	14
singleVariantTiles_01695	381		278		302	264	89	111	88	115	88	114
singleVariantTiles_01696	369		288		257	257	68	96	97	91	103	93
singleVariantTiles_01701	269		257		163	207	130	209	164	189	142	192
singleVariantTiles_01702	347		273		242	236	221	249	205	189	186	250
singleVariantTiles_01703	977		760		683	598	526	527	471	557	420	439
singleVariantTiles_01704	972		848		704	705	467	534	468	499	359	448
singleVariantTiles_01705	404		329		270	271	87	100	122	119	84	119
singleVariantTiles_01706	318		283		293	206	70	100	96	98	83	77
singleVariantTiles_01707	321		283		243	197	68	109	99	83	58	79
singleVariantTiles_01708	308		205		223	172	66	80	81	89	45	91
singleVariantTiles_01709	253		152		125	132	49	82	76	73	35	42
singleVariantTiles_01710	224		191		145	109	70	69	66	53	30	34
singleVariantTiles_01711	548		387		361	378	173	194	130	195	81	112
singleVariantTiles_01712	485		351		281	270	119	123	133	128	52	76
singleVariantTiles_01713	594		409		366	402	146	145	124	151	99	152
singleVariantTiles_01714	696		516		516	496	164	181	184	202	123	190
singleVariantTiles_01715	1187		919		844	727	390	415	407	385	223	286
singleVariantTiles_01716	945		782		725	594	300	380	319	339	189	213
singleVariantTiles_01723	2915		2361		2165	1728	838	903	871	854	514	684
singleVariantTiles_01724	3005		2231		2095	1965	851	1013	906	943	614	789
singleVariantTiles_01739	51		47		23	30	8	13	12	10	5	4
singleVariantTiles_01740	53		32		28	26	5	7	9	10	5	11
singleVariantTiles_01747	1071		742		715	667	588	598	551	636	454	556
singleVariantTiles_01748	1091		916		736	771	548	652	523	582	439	640
singleVariantTiles_01751	31		40		37	29	59	51	66	84	67	74
singleVariantTiles_01752	181		110		129	118	197	227	226	200	271	250
singleVariantTiles_01753	101		63		83	64	105	130	89	151	164	113
singleVariantTiles_01754	696		542		498	520	676	892	892	885	862	906
singleVariantTiles_01769	36		30		22	18	7	6	5	11	6	7
singleVariantTiles_01770	74		48		47	43	12	22	2	7	10	23
singleVariantTiles_01775	90		58		55	68	18	10	25	14	12	13
singleVariantTiles_01776	91		72		67	32	22	12	19	12	12	17
singleVariantTiles_01777	791		628		535	475	326	361	311	307	200	273
singleVariantTiles_01778	1056		805		700	676	399	476	447	429	241	267
singleVariantTiles_01779	184		134		146	144	26	25	20	28	10	26
singleVariantTiles_01780	170		130		131	129	29	25	26	56	29	24
singleVariantTiles_01781	137		111		62	78	33	36	25	18	20	20
singleVariantTiles_01782	86		79		69	40	35	23	19	15	14	18
singleVariantTiles_01783	359		234		269	211	93	75	92	73	51	88
singleVariantTiles_01784	569		397		385	315	139	203	132	178	145	165
singleVariantTiles_01785	192		104		134	81	33	40	26	42	26	31
singleVariantTiles_01786	165		96		101	73	26	23	25	26	23	24
singleVariantTiles_01787	367		270		262	208	163	137	168	151	124	122
singleVariantTiles_01788	385		269		255	242	140	129	125	149	86	83
singleVariantTiles_01791	2140		1676		1381	1322	549	634	595	539	258	417
singleVariantTiles_01792	1743		1322		1216	1177	498	550	460	448	219	331
singleVariantTiles_01793	639		512		497	442	175	211	200	215	97	142
singleVariantTiles_01794	826		520		477	435	216	253	255	244	120	173
singleVariantTiles_01795	304		282		233	201	84	88	102	96	61	79
singleVariantTiles_01796	380		329		226	256	93	122	94	91	39	76
singleVariantTiles_01797	207		196		202	166	45	45	34	41	48	61
singleVariantTiles_01798	175		162		149	134	22	26	38	37	45	43
singleVariantTiles_01799	307		191		205	187	115	135	88	99	98	95
singleVariantTiles_01800	208		229		206	169	57	99	81	66	49	85
singleVariantTiles_01815	162		127		124	133	408	402	437	485	432	401
singleVariantTiles_01816	275		188		192	171	682	656	614	636	625	632
singleVariantTiles_01817	789		627		558	467	70	99	83	128	88	82
singleVariantTiles_01818	617		511		461	424	77	77	68	116	77	79
singleVariantTiles_01845	214		169		138	145	70	103	71	105	48	54
singleVariantTiles_01846	258		170		165	147	101	129	87	107	45	75
singleVariantTiles_01847	156		108		108	103	446	453	396	346	361	380
singleVariantTiles_01848	166		141		96	136	415	410	392	568	482	568
singleVariantTiles_01883	551		357		359	302	163	144	120	120	82	100
singleVariantTiles_01884	502		363		361	291	149	166	122	135	64	121
singleVariantTiles_01901	309		180		230	168	111	163	116	106	137	127
singleVariantTiles_01902	298		192		199	179	115	101	103	108	90	99
singleVariantTiles_01903	298		178		158	197	74	76	60	77	48	64
singleVariantTiles_01904	213		149		89	118	48	37	39	42	42	57
singleVariantTiles_01905	155		95		73	75	46	37	40	53	16	31
singleVariantTiles_01906	157		97		105	99	44	57	50	41	23	46
singleVariantTiles_01927	1404		1033		971	834	455	522	438	481	270	370
singleVariantTiles_01928	853		748		636	567	269	349	296	290	163	208
singleVariantTiles_01939	126		101		97	67	55	64	71	60	65	63
singleVariantTiles_01940	169		106		92	99	104	94	68	72	70	87
singleVariantTiles_01953	420		303		315	252	129	167	133	175	81	98
singleVariantTiles_01954	396		319		267	279	188	182	159	218	90	115
singleVariantTiles_01955	256		178		151	124	108	81	86	53	37	69
singleVariantTiles_01956	238		178		172	146	87	97	62	100	38	61
singleVariantTiles_01967	3835		2878		2685	2340	1248	1422	1289	1348	669	1053
singleVariantTiles_01968	3046		2294		2237	1922	1051	1137	1066	1102	616	854
singleVariantTiles_02031	678		506		492	422	451	462	463	491	540	484
singleVariantTiles_02032	718		599		515	490	502	592	466	544	500	491
singleVariantTiles_02047	534		480		365	314	187	216	207	201	110	125
singleVariantTiles_02048	417		307		287	270	164	140	121	138	90	94
singleVariantTiles_02053	242		186		131	124	69	72	54	54	46	66
singleVariantTiles_02054	399		298		280	236	103	91	94	103	73	105
singleVariantTiles_02061	775		657		532	441	197	224	234	218	163	208
singleVariantTiles_02062	707		474		489	385	207	204	163	190	123	150
singleVariantTiles_02071	712		507		467	403	169	217	175	212	108	147
singleVariantTiles_02072	773		607		574	523	225	275	224	248	151	176
singleVariantTiles_02099	889		618		613	508	234	262	256	271	268	362
singleVariantTiles_02100	1020		802		732	643	304	313	299	309	289	446
singleVariantTiles_02107	177		145		131	111	49	55	55	56	47	46
singleVariantTiles_02108	236		151		143	131	63	77	53	84	38	54
singleVariantTiles_02109	792		583		523	430	162	147	136	152	138	185
singleVariantTiles_02110	686		591		470	428	137	169	144	140	131	143
singleVariantTiles_02115	1100		858		809	685	275	304	222	232	132	205
singleVariantTiles_02116	733		557		512	480	182	195	174	156	96	156
singleVariantTiles_02117	277		216		200	199	144	184	143	142	114	148
singleVariantTiles_02118	369		292		252	252	169	180	181	179	136	178
singleVariantTiles_02119	1032		810		746	664	470	594	509	534	414	550
singleVariantTiles_02120	834		610		610	537	415	445	365	386	320	410
singleVariantTiles_02121	1076		811		781	634	189	191	178	202	151	186
singleVariantTiles_02122	1417		1172		1126	981	337	379	379	351	296	352
singleVariantTiles_02127	62		51		36	41	83	82	76	80	91	68
singleVariantTiles_02128	73		42		37	50	66	142	75	71	64	87
singleVariantTiles_02141	703		579		399	381	176	204	173	162	92	180
singleVariantTiles_02142	609		444		427	379	185	218	171	193	108	158
singleVariantTiles_02143	5		14		12	13	3	5	3	3	12	9
singleVariantTiles_02144	34		31		32	24	16	23	19	24	19	46
singleVariantTiles_02145	13		22		15	16	6	18	15	7	18	13
singleVariantTiles_02146	18		14		16	11	9	9	10	5	9	9
singleVariantTiles_02147	500		410		364	296	317	340	389	353	476	526
singleVariantTiles_02148	488		347		310	334	225	230	233	228	213	316
singleVariantTiles_02149	336		292		259	243	230	280	273	248	248	381
singleVariantTiles_02150	231		215		219	190	149	223	150	202	163	267
singleVariantTiles_02151	5		10		5	0	4	4	2	10	7	6
singleVariantTiles_02152	8		5		3	6	9	13	11	16	13	15
singleVariantTiles_02154	0		0		1	0	0	0	0	0	0	0
singleVariantTiles_02155	625		519		449	434	399	395	423	416	381	554
singleVariantTiles_02156	895		632		608	498	593	660	526	621	672	897
singleVariantTiles_02157	694		536		467	471	445	500	417	371	442	620
singleVariantTiles_02158	840		618		655	520	557	606	557	514	652	910
singleVariantTiles_02161	440		325		310	272	57	85	59	65	81	98
singleVariantTiles_02162	666		475		497	391	100	111	111	95	110	157
singleVariantTiles_02165	1242		1039		935	748	492	612	529	472	487	686
singleVariantTiles_02166	1061		855		789	689	447	503	420	411	460	687
singleVariantTiles_02175	211		151		132	136	35	33	29	47	26	34
singleVariantTiles_02176	227		181		140	108	26	44	52	42	23	29
singleVariantTiles_02177	1595		1184		1170	1034	1447	1538	1400	1424	1411	1702
singleVariantTiles_02178	1432		1260		1016	998	656	762	723	719	559	668
singleVariantTiles_02185	151		117		144	114	73	94	76	78	149	262
singleVariantTiles_02186	212		136		126	97	78	84	86	59	110	271
singleVariantTiles_02187	23		23		20	21	9	31	32	7	20	51
singleVariantTiles_02188	14		6		7	7	9	3	1	4	9	12
singleVariantTiles_02191	98		32		44	47	16	20	11	8	19	74
singleVariantTiles_02192	53		26		28	18	8	16	12	12	13	45
singleVariantTiles_02193	115		72		98	73	16	24	34	28	43	133
singleVariantTiles_02194	95		91		79	82	40	34	34	12	53	147
singleVariantTiles_02195	388		283		282	237	121	136	94	115	64	172
singleVariantTiles_02196	429		289		291	217	97	135	103	118	52	144
singleVariantTiles_02197	302		247		250	200	137	113	113	137	69	146
singleVariantTiles_02198	372		288		256	185	121	163	131	138	59	116
singleVariantTiles_02199	263		242		195	167	100	103	104	98	38	75
singleVariantTiles_02200	411		357		310	257	160	195	164	126	59	99
singleVariantTiles_02201	168		102		132	92	65	71	64	57	43	65
singleVariantTiles_02202	145		81		79	75	48	40	40	56	45	59
singleVariantTiles_02203	0		0		1	0	0	0	0	0	1	0
singleVariantTiles_02204	1		12		5	3	0	2	2	0	0	0
singleVariantTiles_02205	160		143		155	98	70	53	68	75	54	69
singleVariantTiles_02206	155		123		99	74	67	75	49	62	56	63
singleVariantTiles_02209	434		328		244	226	34	39	46	31	28	39
singleVariantTiles_02210	497		393		315	301	39	39	38	57	43	62
singleVariantTiles_02223	1364		1035		899	809	174	172	175	133	119	147
singleVariantTiles_02224	1804		1303		1152	1068	180	177	162	200	150	184
singleVariantTiles_02237	80		64		51	51	8	5	14	16	8	10
singleVariantTiles_02238	116		101		81	54	7	7	11	13	7	10
singleVariantTiles_02239	1173		815		774	695	450	501	424	496	232	332
singleVariantTiles_02240	878		648		592	559	280	332	252	293	148	189
singleVariantTiles_02251	43		27		16	29	23	44	33	41	31	41
singleVariantTiles_02252	40		17		6	16	39	17	25	26	26	22
singleVariantTiles_02253	21		24		19	16	43	50	62	47	42	40
singleVariantTiles_02254	17		22		19	16	42	25	35	19	29	24
singleVariantTiles_02255	389		326		267	248	210	208	225	209	179	213
singleVariantTiles_02256	359		299		307	248	229	257	217	249	197	200
singleVariantTiles_02257	1119		906		780	721	277	334	330	287	206	296
singleVariantTiles_02258	822		673		578	550	212	255	263	207	158	205
singleVariantTiles_02259	8		3		12	11	0	6	1	5	2	1
singleVariantTiles_02260	7		9		11	8	3	8	5	4	2	4
singleVariantTiles_02261	3937		3103		2892	2835	7027	8624	7282	6378	9115	12421
singleVariantTiles_02262	2454		1890		1902	1755	4585	5533	4810	4029	5731	7661
singleVariantTiles_02263	2919		2179		2266	2117	6419	6987	6171	5911	7619	10675
singleVariantTiles_02264	2000		1620		1654	1470	5023	5955	4910	4492	6136	8557
singleVariantTiles_02265	1708		1290		1263	1052	794	1024	893	992	785	820
singleVariantTiles_02266	1390		1204		1097	1045	799	839	747	757	718	725
singleVariantTiles_02267	477		344		353	352	127	128	143	114	131	162
singleVariantTiles_02268	328		291		245	208	78	81	119	89	89	136
singleVariantTiles_02269	119		115		74	75	197	250	215	242	226	185
singleVariantTiles_02270	203		127		139	113	370	403	307	344	314	324
singleVariantTiles_02279	862		621		553	542	233	245	198	247	113	198
singleVariantTiles_02280	769		636		533	441	200	223	195	212	97	174
singleVariantTiles_02295	346		266		239	205	147	168	120	149	89	98
singleVariantTiles_02296	337		216		181	196	132	130	95	146	71	117
singleVariantTiles_02297	259		217		184	158	104	130	106	105	73	77
singleVariantTiles_02298	385		231		235	216	159	134	150	117	110	134
singleVariantTiles_02309	287		209		167	174	35	32	25	41	19	28
singleVariantTiles_02310	217		181		185	161	29	36	31	24	21	28
singleVariantTiles_02345	219		157		149	175	95	137	85	113	111	134
singleVariantTiles_02346	161		132		126	114	73	79	65	80	96	75
singleVariantTiles_02361	166		146		152	119	108	130	101	120	102	124
singleVariantTiles_02362	188		155		144	133	116	127	93	92	148	167
singleVariantTiles_02373	80		77		85	75	224	250	233	193	210	239
singleVariantTiles_02374	95		90		92	77	331	355	335	313	355	305
singleVariantTiles_02377	64		55		78	48	96	132	163	121	139	142
singleVariantTiles_02378	72		32		74	52	116	165	92	125	157	95
singleVariantTiles_02397	1861		1412		1321	1222	2381	2420	2396	2558	2501	2360
singleVariantTiles_02398	1591		1337		1253	1166	1946	2365	2168	2315	2191	2175
singleVariantTiles_02409	38		28		27	22	12	11	3	15	10	6
singleVariantTiles_02410	1		1		3	20	1	2	5	4	1	4
singleVariantTiles_02417	671		460		415	421	665	768	689	629	634	892
singleVariantTiles_02418	531		371		348	289	588	674	640	602	514	827
singleVariantTiles_02419	464		326		271	247	200	185	188	139	119	256
singleVariantTiles_02420	368		295		254	266	130	205	157	143	106	279
singleVariantTiles_02421	153		75		63	84	50	61	42	49	41	60
singleVariantTiles_02422	99		91		76	75	45	41	46	38	18	27
singleVariantTiles_02427	233		170		162	170	167	194	184	229	269	225
singleVariantTiles_02428	89		62		63	62	88	110	70	110	99	92
singleVariantTiles_02443	439		359		277	337	339	385	392	426	416	441
singleVariantTiles_02444	402		275		274	271	270	385	358	273	294	372
singleVariantTiles_02483	637		500		465	380	369	402	400	400	543	521
singleVariantTiles_02484	468		412		344	356	254	345	264	255	392	402
singleVariantTiles_02487	337		181		190	149	100	135	89	121	86	105
singleVariantTiles_02488	424		245		232	230	150	145	132	161	110	114
singleVariantTiles_02491	7		3		7	7	3	2	2	4	2	1
singleVariantTiles_02492	16		0		2	5	6	1	0	1	1	1
singleVariantTiles_02493	662		527		426	408	307	367	306	366	366	372
singleVariantTiles_02494	647		523		527	495	341	404	336	371	330	378
singleVariantTiles_02495	5292		4096		4076	3453	2775	3164	2969	2946	3488	4643
singleVariantTiles_02496	5831		4671		4267	3772	2868	3073	2987	2920	3215	4163
singleVariantTiles_02497	670		558		464	457	44	36	36	41	33	53
singleVariantTiles_02498	664		558		521	438	57	45	59	63	33	47
singleVariantTiles_02499	851		742		601	507	352	326	309	387	208	270
singleVariantTiles_02500	931		756		651	553	331	344	351	342	221	265
singleVariantTiles_02501	294		242		225	219	132	152	177	140	150	125
singleVariantTiles_02502	396		267		279	237	170	193	168	144	179	173
singleVariantTiles_02503	706		588		567	523	490	581	603	564	620	630
singleVariantTiles_02504	763		632		569	570	582	698	604	594	649	702
singleVariantTiles_02509	382		279		229	217	112	113	105	124	80	87
singleVariantTiles_02510	309		248		176	233	71	100	62	70	63	75
singleVariantTiles_02533	97		69		50	70	164	209	137	275	132	206
singleVariantTiles_02534	110		105		108	92	127	182	194	240	133	205
singleVariantTiles_02537	26		18		18	19	30	34	40	49	48	54
singleVariantTiles_02538	53		38		57	29	81	61	70	111	130	87
singleVariantTiles_02539	16		11		22	26	22	21	22	17	26	18
singleVariantTiles_02540	12		6		8	13	8	20	35	7	14	7
singleVariantTiles_02541	324		283		309	282	308	428	338	426	396	460
singleVariantTiles_02542	345		259		232	259	335	385	346	352	365	360
singleVariantTiles_02543	359		259		252	215	349	340	342	358	356	369
singleVariantTiles_02544	527		432		386	386	416	557	569	514	586	481
singleVariantTiles_02545	40		5		15	25	15	8	5	13	14	19
singleVariantTiles_02546	28		12		13	14	8	15	9	12	14	6
singleVariantTiles_02547	2672		2155		1923	1869	6086	6424	6521	6521	5318	8286
singleVariantTiles_02548	2307		1813		1704	1583	4072	4632	4105	4204	3541	5430
singleVariantTiles_02549	1195		1012		983	850	3974	4631	4761	4601	5182	6423
singleVariantTiles_02550	1046		774		706	681	3495	3576	3678	3127	4094	5559
singleVariantTiles_02553	69		70		61	63	147	182	137	154	130	136
singleVariantTiles_02554	60		67		41	87	86	101	93	89	94	148
singleVariantTiles_02555	20		8		14	13	22	54	31	31	23	34
singleVariantTiles_02556	10		15		31	21	23	83	39	82	39	50
singleVariantTiles_02557	593		517		452	413	853	1160	1005	944	947	979
singleVariantTiles_02558	935		724		739	625	1330	1664	1404	1393	1436	1420
singleVariantTiles_02559	304		197		169	176	62	64	53	64	47	77
singleVariantTiles_02560	349		286		228	214	72	83	61	83	61	83
singleVariantTiles_02561	1244		1042		927	855	538	732	618	588	768	990
singleVariantTiles_02562	829		642		679	503	455	477	491	453	558	698
singleVariantTiles_02563	106		70		75	81	10	19	8	18	32	29
singleVariantTiles_02564	153		74		94	86	31	26	25	27	35	24
singleVariantTiles_02567	162		92		90	110	57	70	67	64	39	48
singleVariantTiles_02568	111		89		80	45	49	62	61	68	30	27
singleVariantTiles_02579	2817		2210		2037	1894	1064	1205	1027	1106	650	883
singleVariantTiles_02580	3000		2297		2095	1910	1146	1329	1112	1187	703	937
singleVariantTiles_02599	441		331		296	296	214	232	257	184	197	181
singleVariantTiles_02600	607		405		397	348	280	323	277	322	220	248
singleVariantTiles_02615	33		23		28	43	20	23	11	14	5	19
singleVariantTiles_02616	39		27		18	11	13	10	10	6	1	3
singleVariantTiles_02629	1726		1408		1145	1013	617	530	493	590	294	401
singleVariantTiles_02630	1840		1314		1189	1008	599	539	498	502	295	363
singleVariantTiles_02637	257		206		193	172	48	49	49	39	25	31
singleVariantTiles_02638	281		213		187	153	46	51	48	32	18	39
singleVariantTiles_02648	29		18		6	10	1	2	2	0	3	4
singleVariantTiles_02651	548		417		414	386	264	314	228	300	257	277
singleVariantTiles_02652	611		507		499	493	283	335	297	309	308	311
singleVariantTiles_02681	1802		1535		1630	1231	5212	6242	6037	7193	6516	5703
singleVariantTiles_02682	1789		1498		1571	1218	5567	6384	6121	6769	6513	5579
singleVariantTiles_02685	3175		2364		2471	2058	9551	10436	9289	10675	10200	9318
singleVariantTiles_02686	3089		2404		2637	2216	9957	10640	9953	11512	11696	10151
singleVariantTiles_02687	1887		1498		1554	1200	5206	5890	6109	6779	6211	5509
singleVariantTiles_02688	2127		1767		1863	1577	6498	7594	6960	7479	7742	6948
singleVariantTiles_02703	440		347		291	296	457	422	495	511	464	418
singleVariantTiles_02704	352		285		287	220	404	399	367	379	364	309
singleVariantTiles_02705	1395		1080		943	887	153	185	145	160	143	210
singleVariantTiles_02706	1431		1099		1018	936	165	217	155	215	131	230
singleVariantTiles_02707	1583		1136		1058	919	605	675	544	596	280	351
singleVariantTiles_02708	1406		1170		1071	871	508	587	538	548	273	353
singleVariantTiles_02713	1315		1027		908	815	426	480	430	418	231	302
singleVariantTiles_02714	1356		1104		943	925	390	501	447	499	303	375
singleVariantTiles_02715	315		226		213	187	64	62	76	71	51	49
singleVariantTiles_02716	199		146		154	139	54	34	46	56	45	64
singleVariantTiles_02717	623		437		400	393	182	187	174	194	169	202
singleVariantTiles_02718	476		398		340	297	137	160	186	164	142	162
singleVariantTiles_02719	149		124		102	109	28	44	31	30	22	26
singleVariantTiles_02720	100		83		68	79	19	27	17	12	15	12
singleVariantTiles_02721	174		124		122	119	38	40	47	57	64	45
singleVariantTiles_02722	91		75		63	44	27	26	24	24	21	20
singleVariantTiles_02723	140		78		105	81	29	27	22	25	19	23
singleVariantTiles_02724	76		30		39	54	15	16	8	9	10	9
singleVariantTiles_02731	369		324		256	223	109	139	115	111	68	69
singleVariantTiles_02732	338		252		205	220	110	119	97	128	56	67
singleVariantTiles_02743	46		33		39	41	11	15	15	18	14	15
singleVariantTiles_02744	141		71		62	49	42	42	24	28	42	35
singleVariantTiles_02747	2110		1596		1485	1378	626	716	698	553	1099	1681
singleVariantTiles_02748	2060		1433		1465	1390	557	600	551	386	1002	1549
singleVariantTiles_02749	958		702		761	727	1213	1426	1338	1209	1943	2739
singleVariantTiles_02750	604		513		476	390	842	960	974	808	1353	1624
singleVariantTiles_02755	73		42		47	50	51	70	64	44	62	65
singleVariantTiles_02756	23		31		45	23	21	26	35	14	61	42
singleVariantTiles_02767	445		343		310	289	176	196	171	191	98	173
singleVariantTiles_02768	398		321		297	244	148	164	169	146	80	94
singleVariantTiles_02779	466		368		334	258	181	174	176	185	76	138
singleVariantTiles_02780	502		354		389	308	203	230	182	200	163	184
singleVariantTiles_02801	208		222		185	132	74	79	94	64	42	62
singleVariantTiles_02802	251		175		156	152	65	79	66	64	48	46
singleVariantTiles_02809	521		387		341	403	178	156	141	146	134	155
singleVariantTiles_02810	533		379		345	369	188	142	140	145	107	161
singleVariantTiles_02811	433		342		316	303	131	160	110	147	93	145
singleVariantTiles_02812	458		327		346	310	118	131	119	125	72	144
singleVariantTiles_02813	247		189		173	168	31	51	27	43	51	62
singleVariantTiles_02814	213		164		158	125	39	42	37	63	48	77
singleVariantTiles_02815	459		334		315	302	46	59	62	99	79	85
singleVariantTiles_02816	567		383		351	309	101	100	75	92	77	118
singleVariantTiles_02817	159		169		164	113	35	43	53	53	36	55
singleVariantTiles_02818	226		127		160	145	51	56	42	54	42	59
singleVariantTiles_02819	30		9		9	19	3	2	0	0	1	5
singleVariantTiles_02820	17		6		15	6	1	1	0	3	0	3
singleVariantTiles_02843	83		48		45	52	32	41	31	52	34	43
singleVariantTiles_02844	46		44		38	34	24	34	50	43	25	22
singleVariantTiles_02845	798		697		602	503	822	1098	917	1114	982	858
singleVariantTiles_02846	1083		849		715	522	1083	1259	1189	1202	1173	1039
singleVariantTiles_02847	3493		2675		2471	2086	1160	1242	1205	1225	491	780
singleVariantTiles_02848	3794		2865		2540	2096	1269	1336	1164	1208	502	705
singleVariantTiles_02849	362		284		264	256	81	84	70	78	52	65
singleVariantTiles_02850	385		312		294	276	50	70	73	86	53	72
singleVariantTiles_02851	831		604		580	456	143	157	144	120	124	104
singleVariantTiles_02852	718		486		463	449	114	112	118	124	91	101
singleVariantTiles_02853	368		251		225	172	86	145	102	133	38	62
singleVariantTiles_02854	338		260		240	179	91	110	112	97	33	67
singleVariantTiles_02855	1394		1135		1087	866	538	623	546	583	270	356
singleVariantTiles_02856	1812		1455		1265	1108	662	789	695	704	317	445
singleVariantTiles_02857	2410		2098		1846	1635	704	820	769	696	418	537
singleVariantTiles_02858	2775		2074		1924	1742	791	900	772	825	454	633
singleVariantTiles_02859	284		185		194	136	95	91	84	118	46	75
singleVariantTiles_02860	252		154		151	130	71	103	68	67	43	57
singleVariantTiles_02861	2165		1578		1466	1241	582	652	614	588	308	433
singleVariantTiles_02862	2787		2224		1974	1651	815	905	816	834	405	588
singleVariantTiles_02863	1575		1185		1070	943	458	510	483	544	221	323
singleVariantTiles_02864	1722		1382		1181	1045	533	556	520	547	263	367
singleVariantTiles_02865	1458		1064		900	779	312	334	355	325	175	198
singleVariantTiles_02866	1083		840		768	700	312	446	379	376	166	240
singleVariantTiles_02867	3869		3120		2634	2284	1340	1593	1350	1410	879	1171
singleVariantTiles_02868	4085		3194		2730	2493	1373	1580	1392	1399	803	1161
singleVariantTiles_02869	1102		865		749	732	363	384	369	364	247	386
singleVariantTiles_02870	854		627		642	546	264	299	241	239	181	347
singleVariantTiles_02871	910		682		561	575	366	377	377	320	176	305
singleVariantTiles_02872	995		748		667	546	351	410	359	376	168	237
singleVariantTiles_02873	4080		3146		2713	2434	1455	1557	1454	1488	827	1256
singleVariantTiles_02874	4127		3180		2740	2326	1431	1611	1390	1489	770	1276
singleVariantTiles_02875	2470		1948		1746	1527	903	1102	953	972	620	795
singleVariantTiles_02876	2841		2231		1930	1629	1075	1237	1039	1147	625	869
singleVariantTiles_02877	1208		798		799	744	326	389	317	367	209	264
singleVariantTiles_02878	1388		1038		956	846	454	443	404	419	216	331
singleVariantTiles_02879	236		156		158	186	27	32	29	35	29	39
singleVariantTiles_02880	352		245		265	222	60	66	70	81	50	75
singleVariantTiles_02881	138		144		104	115	40	49	29	30	23	37
singleVariantTiles_02882	167		162		117	110	66	77	79	66	42	39
singleVariantTiles_02883	623		488		424	374	107	114	109	96	110	121
singleVariantTiles_02884	412		393		357	263	77	75	78	77	60	89
singleVariantTiles_02885	422		318		266	243	113	113	103	153	107	109
singleVariantTiles_02886	328		234		227	159	93	86	86	77	76	86
singleVariantTiles_02887	433		318		326	262	115	112	105	114	118	104
singleVariantTiles_02888	356		277		256	235	78	100	88	88	94	93
singleVariantTiles_02889	254		204		183	122	70	83	91	79	109	93
singleVariantTiles_02890	262		148		227	165	112	95	89	110	114	112
singleVariantTiles_02893	131		91		85	84	9	14	17	13	21	26
singleVariantTiles_02894	129		128		120	98	23	28	28	21	31	38
singleVariantTiles_02907	2042		1704		1643	1417	2299	2592	2413	2728	2536	1877
singleVariantTiles_02908	2126		1542		1606	1427	2188	2577	2294	2660	2471	1844
singleVariantTiles_02909	1141		870		805	705	244	263	277	219	214	226
singleVariantTiles_02910	1132		857		810	676	185	256	208	225	198	232
singleVariantTiles_02915	327		249		263	231	38	50	59	84	52	84
singleVariantTiles_02916	397		329		294	255	63	82	60	56	61	75
singleVariantTiles_02917	443		250		214	239	112	116	84	84	67	107
singleVariantTiles_02918	437		329		319	288	121	119	93	94	102	177
singleVariantTiles_02919	727		577		509	542	311	327	252	284	246	328
singleVariantTiles_02920	609		569		466	443	229	267	255	227	233	366
singleVariantTiles_02921	438		332		337	281	185	265	206	146	259	445
singleVariantTiles_02922	693		625		555	529	353	438	350	278	495	798
singleVariantTiles_02924	0		0		2	0	0	0	0	0	0	0
singleVariantTiles_02927	242		168		141	122	87	114	109	65	63	77
singleVariantTiles_02928	199		145		98	106	76	101	78	68	59	86
singleVariantTiles_02929	11		8		15	4	9	10	6	9	13	11
singleVariantTiles_02930	4		2		4	2	1	4	1	2	0	0
singleVariantTiles_02932	6		0		7	5	4	6	2	2	3	1
singleVariantTiles_02933	2437		1810		1672	1474	691	747	664	727	409	577
singleVariantTiles_02934	2493		1875		1623	1522	786	839	734	792	458	633
singleVariantTiles_02935	501		325		325	274	161	131	148	125	71	96
singleVariantTiles_02936	508		324		325	307	188	180	141	160	99	144
singleVariantTiles_02937	1210		904		827	700	420	454	427	424	265	313
singleVariantTiles_02938	1192		1017		869	781	382	407	428	379	234	312
singleVariantTiles_02939	380		289		254	270	114	100	76	127	49	90
singleVariantTiles_02940	455		371		309	267	116	129	117	117	68	85
singleVariantTiles_02945	147		104		103	86	49	35	34	37	21	18
singleVariantTiles_02946	235		150		130	157	75	56	37	61	36	58
singleVariantTiles_02959	891		673		684	692	399	444	414	408	597	793
singleVariantTiles_02960	824		645		586	569	512	560	543	546	730	941
singleVariantTiles_02961	1545		1098		1088	946	675	745	607	716	761	1013
singleVariantTiles_02962	1746		1276		1201	1144	742	809	782	763	903	1302
singleVariantTiles_02963	511		421		379	339	232	197	198	211	247	433
singleVariantTiles_02964	514		395		371	328	231	231	253	226	295	367
singleVariantTiles_02965	1515		1142		1144	979	360	405	366	375	498	636
singleVariantTiles_02966	1777		1346		1218	1059	391	407	406	460	535	633
singleVariantTiles_02967	240		174		126	133	48	44	33	49	47	48
singleVariantTiles_02968	249		147		141	134	52	48	38	34	26	66
singleVariantTiles_02969	66		56		55	36	25	30	14	30	25	33
singleVariantTiles_02970	152		128		94	113	41	41	44	50	29	42
singleVariantTiles_02971	82		66		99	79	33	45	47	43	52	50
singleVariantTiles_02972	91		77		77	78	34	60	58	41	34	53
singleVariantTiles_02973	102		57		38	69	52	50	56	47	26	49
singleVariantTiles_02974	103		87		86	63	76	69	59	50	45	49
singleVariantTiles_02975	81		71		44	44	44	40	58	34	29	42
singleVariantTiles_02976	90		39		68	46	53	30	50	54	31	36
singleVariantTiles_02977	398		326		296	259	404	377	380	362	321	388
singleVariantTiles_02978	410		338		280	263	375	407	410	373	378	353
singleVariantTiles_02979	942		728		623	663	263	238	249	231	117	175
singleVariantTiles_02980	743		602		525	451	146	209	164	154	95	161
singleVariantTiles_02989	129		98		103	74	52	65	66	46	39	37
singleVariantTiles_02990	198		124		107	122	107	91	58	61	48	47
singleVariantTiles_02991	177		136		106	117	79	92	56	66	35	37
singleVariantTiles_02992	158		135		117	116	61	99	65	84	31	55
singleVariantTiles_03003	1253		925		806	687	934	1063	964	1030	803	971
singleVariantTiles_03004	1246		921		836	802	951	1116	1009	981	874	968
singleVariantTiles_03005	2082		1694		1553	1395	1049	1211	1048	1176	728	895
singleVariantTiles_03006	2334		1741		1668	1346	1083	1186	1070	1189	654	858
singleVariantTiles_03021	125		105		88	81	78	46	42	45	37	50
singleVariantTiles_03022	389		240		217	168	104	108	121	123	80	97
singleVariantTiles_03023	684		562		534	472	270	287	276	262	166	259
singleVariantTiles_03024	815		583		555	521	286	370	301	292	204	308
singleVariantTiles_03025	244		138		169	179	78	83	70	79	48	93
singleVariantTiles_03026	287		189		150	143	81	98	88	110	81	108
singleVariantTiles_03027	388		318		254	250	146	178	149	169	114	133
singleVariantTiles_03028	520		368		342	286	184	256	205	163	121	142
singleVariantTiles_03029	232		157		148	131	99	95	94	78	61	61
singleVariantTiles_03030	170		153		161	132	66	127	101	98	54	55
singleVariantTiles_03031	156		126		110	108	75	94	80	73	52	66
singleVariantTiles_03032	220		139		126	119	121	106	70	133	108	111
singleVariantTiles_03033	689		524		417	404	236	329	255	248	179	237
singleVariantTiles_03034	832		593		553	494	342	375	284	324	262	271
singleVariantTiles_03035	81		90		83	53	218	310	354	232	279	347
singleVariantTiles_03036	71		77		67	54	260	311	303	303	357	369
singleVariantTiles_03037	5		7		4	7	19	46	23	28	24	44
singleVariantTiles_03038	3		3		1	5	1	3	4	5	8	5
singleVariantTiles_03039	165		134		124	83	85	81	137	104	158	159
singleVariantTiles_03040	104		96		72	61	71	102	100	87	81	143
singleVariantTiles_03041	432		341		330	269	151	153	139	170	133	213
singleVariantTiles_03042	403		340		252	280	152	170	157	118	133	226
singleVariantTiles_03057	704		556		498	524	76	106	80	108	59	71
singleVariantTiles_03058	712		541		478	422	108	97	100	102	58	76
singleVariantTiles_03063	149		126		119	121	33	54	41	57	30	44
singleVariantTiles_03064	195		108		103	112	44	60	31	61	36	63
singleVariantTiles_03065	87		76		45	41	46	31	27	17	15	21
singleVariantTiles_03066	121		90		113	97	37	32	33	32	35	50
singleVariantTiles_03075	1493		1230		1068	991	473	550	426	444	273	345
singleVariantTiles_03076	1494		1191		1031	921	402	533	445	476	218	303
singleVariantTiles_03091	55		48		31	47	19	31	18	13	7	14
singleVariantTiles_03092	43		27		21	19	15	11	9	12	4	4
singleVariantTiles_03093	29		21		37	34	11	7	7	10	13	5
singleVariantTiles_03094	48		10		25	25	3	7	7	8	5	8
singleVariantTiles_03095	39		52		38	38	9	21	33	16	8	11
singleVariantTiles_03096	59		16		25	20	18	23	9	18	8	13
singleVariantTiles_03097	50		28		22	34	11	19	13	17	12	19
singleVariantTiles_03098	39		30		43	27	16	29	12	29	21	20
singleVariantTiles_03099	142		97		70	68	46	50	37	26	48	79
singleVariantTiles_03100	137		94		99	119	19	22	20	27	13	40
singleVariantTiles_03125	180		131		141	110	62	67	42	78	30	34
singleVariantTiles_03126	271		170		137	130	106	85	90	76	36	32
singleVariantTiles_03143	557		390		428	357	160	245	160	178	84	158
singleVariantTiles_03144	699		492		478	392	240	300	273	252	232	347
singleVariantTiles_03149	422		388		269	296	48	73	48	69	62	75
singleVariantTiles_03150	499		418		403	340	74	65	64	68	93	113
singleVariantTiles_03165	3		3		1	1	1	0	1	0	1	1
singleVariantTiles_03166	5		4		8	3	3	8	2	4	1	7
singleVariantTiles_03167	632		489		393	445	311	385	344	369	257	267
singleVariantTiles_03168	1647		1307		1162	1054	814	995	891	893	679	781
singleVariantTiles_03171	304		235		227	230	244	404	296	309	330	498
singleVariantTiles_03172	349		202		241	246	226	318	236	272	271	426
singleVariantTiles_03173	181		83		80	106	157	170	102	134	173	287
singleVariantTiles_03174	260		170		198	162	264	280	225	239	325	496
singleVariantTiles_03181	82		68		60	50	36	48	22	49	27	23
singleVariantTiles_03182	104		87		67	67	44	43	46	46	17	29
singleVariantTiles_03185	317		290		248	232	133	146	136	133	84	104
singleVariantTiles_03186	264		225		172	147	123	79	115	114	70	92
singleVariantTiles_03191	708		485		454	388	245	290	235	277	151	201
singleVariantTiles_03192	745		522		541	488	293	309	275	347	175	261
singleVariantTiles_03197	202		214		149	184	249	309	313	324	303	302
singleVariantTiles_03198	279		179		199	183	314	310	308	404	328	371
singleVariantTiles_03215	1315		969		912	930	1018	1098	1085	838	1273	1977
singleVariantTiles_03216	986		722		703	713	674	932	697	740	953	1630
singleVariantTiles_03223	2		2		6	1	3	6	0	4	2	2
singleVariantTiles_03225	151		161		132	105	45	47	65	53	53	57
singleVariantTiles_03226	203		163		151	93	59	57	58	52	66	63
singleVariantTiles_03227	156		109		83	81	12	22	17	8	13	25
singleVariantTiles_03228	225		173		141	139	16	22	11	11	23	41
singleVariantTiles_03251	131		126		90	92	47	74	60	64	28	43
singleVariantTiles_03252	191		108		137	88	54	58	73	68	31	40
singleVariantTiles_03259	208		144		120	144	81	82	70	81	36	55
singleVariantTiles_03260	258		161		168	115	79	97	83	89	41	59
singleVariantTiles_03269	7		0		0	1	0	0	1	0	0	1
singleVariantTiles_03270	0		0		0	1	0	0	0	0	0	0
singleVariantTiles_03281	27		18		23	14	0	2	3	2	1	4
singleVariantTiles_03282	99		58		40	66	8	7	7	3	10	12
singleVariantTiles_03291	401		296		271	229	274	259	228	310	297	305
singleVariantTiles_03292	423		330		259	277	249	281	296	356	324	341
singleVariantTiles_03305	1308		907		905	775	316	341	278	329	198	240
singleVariantTiles_03306	828		542		579	443	193	227	133	215	99	153
singleVariantTiles_03307	211		161		157	93	59	59	70	61	46	35
singleVariantTiles_03308	202		151		126	104	69	51	55	59	30	32
singleVariantTiles_03325	351		244		259	261	154	152	115	180	126	145
singleVariantTiles_03326	575		432		383	371	210	249	180	213	161	232
singleVariantTiles_03327	525		392		389	361	202	252	191	208	217	246
singleVariantTiles_03328	468		350		295	287	234	283	228	206	240	284
singleVariantTiles_03329	90		105		72	89	83	90	81	126	91	121
singleVariantTiles_03330	111		70		67	62	94	87	94	70	61	73
singleVariantTiles_03353	1		2		0	4	0	0	1	4	1	2
singleVariantTiles_03354	2		0		0	0	0	0	0	0	0	0
singleVariantTiles_03383	1425		1109		1108	935	530	609	576	588	523	733
singleVariantTiles_03384	1296		978		964	857	483	502	446	466	479	636
singleVariantTiles_03385	1066		906		715	717	244	225	275	263	186	272
singleVariantTiles_03386	797		639		575	627	182	200	172	199	124	226
singleVariantTiles_03397	667		534		480	435	224	250	224	231	115	195
singleVariantTiles_03398	747		674		567	520	246	265	235	273	164	206
singleVariantTiles_03403	296		199		256	204	121	138	110	140	199	260
singleVariantTiles_03404	263		212		199	209	112	129	91	100	172	239
singleVariantTiles_03405	133		112		94	104	40	65	44	41	54	79
singleVariantTiles_03406	110		80		112	120	23	42	37	31	62	84
singleVariantTiles_03407	52		62		45	35	36	20	23	22	17	28
singleVariantTiles_03408	85		49		47	49	17	29	18	35	18	23
singleVariantTiles_03409	7913		5999		5756	5439	7092	8386	7545	7124	11083	13262
singleVariantTiles_03410	8575		6614		6517	6071	7760	9214	8180	8281	12483	14908
singleVariantTiles_03411	1041		737		697	713	1423	1685	1622	1437	2021	2281
singleVariantTiles_03412	1271		975		876	836	1517	1755	1575	1514	2086	2434
singleVariantTiles_03413	2		4		6	3	4	10	3	3	2	6
singleVariantTiles_03414	5		5		0	1	3	0	17	1	1	2
singleVariantTiles_03421	455		376		299	302	104	113	120	94	101	127
singleVariantTiles_03422	319		224		220	204	62	79	69	79	70	50
singleVariantTiles_03431	1501		1206		1083	998	473	550	473	541	343	394
singleVariantTiles_03432	1759		1375		1242	1150	460	529	455	450	404	499
singleVariantTiles_03433	1391		1095		1106	914	723	776	682	698	676	840
singleVariantTiles_03434	1685		1427		1285	1140	817	930	927	888	841	923
singleVariantTiles_03443	732		494		494	360	246	232	204	208	122	128
singleVariantTiles_03444	586		470		404	331	165	213	199	241	113	143
singleVariantTiles_03461	572		492		397	320	213	264	223	176	83	158
singleVariantTiles_03462	613		487		422	364	206	215	197	237	107	129
singleVariantTiles_03475	210		154		145	109	64	50	47	71	36	48
singleVariantTiles_03476	161		175		139	125	38	52	63	50	20	36
singleVariantTiles_03491	239		125		153	119	53	65	49	59	54	58
singleVariantTiles_03492	244		192		184	161	62	79	86	84	72	70
singleVariantTiles_03501	731		576		457	476	166	207	175	196	125	200
singleVariantTiles_03502	953		810		660	729	225	287	272	256	193	242
singleVariantTiles_03523	197		129		139	153	68	122	102	107	89	121
singleVariantTiles_03524	103		94		118	98	57	61	55	70	86	93
singleVariantTiles_03533	1467		1211		988	891	426	436	424	433	281	380
singleVariantTiles_03534	1623		1207		1114	1036	518	484	489	474	314	383
singleVariantTiles_03537	265		194		173	173	71	91	77	73	115	116
singleVariantTiles_03538	244		181		141	130	39	47	46	51	60	73
singleVariantTiles_03539	349		275		268	261	123	234	177	177	194	283
singleVariantTiles_03540	414		266		280	276	191	225	165	170	272	257
singleVariantTiles_03541	224		176		206	156	91	91	100	92	73	122
singleVariantTiles_03542	257		210		209	164	93	115	87	72	70	112
singleVariantTiles_03547	2035		1551		1527	1376	535	607	457	598	325	463
singleVariantTiles_03548	2096		1602		1485	1367	469	521	475	446	280	408
singleVariantTiles_03551	2259		1770		1659	1518	519	511	496	529	376	446
singleVariantTiles_03552	1966		1597		1501	1334	474	555	466	557	362	439
singleVariantTiles_03573	170		99		111	118	48	58	44	45	43	40
singleVariantTiles_03574	154		131		151	79	59	58	55	66	39	40
singleVariantTiles_03575	628		418		415	328	166	186	171	209	102	135
singleVariantTiles_03576	652		500		427	350	151	217	186	194	100	134
singleVariantTiles_03579	379		353		269	272	114	141	132	152	91	111
singleVariantTiles_03580	504		443		399	319	165	147	173	214	120	146
singleVariantTiles_03585	491		418		299	305	128	164	118	155	60	81
singleVariantTiles_03586	435		288		264	247	109	112	90	128	68	88
singleVariantTiles_03587	243		226		176	153	81	96	102	80	66	66
singleVariantTiles_03588	351		255		183	189	135	116	134	117	56	74
singleVariantTiles_03589	137		99		86	69	24	18	29	31	11	25
singleVariantTiles_03590	218		163		151	171	38	35	33	31	34	29
singleVariantTiles_03591	107		93		71	78	44	40	38	37	26	53
singleVariantTiles_03592	102		71		70	46	41	41	27	39	21	30
singleVariantTiles_03609	618		465		400	310	422	423	409	391	377	491
singleVariantTiles_03610	2332		1831		1735	1417	1207	1425	1193	1273	1208	1317
singleVariantTiles_03619	243		237		219	209	84	144	127	137	152	181
singleVariantTiles_03620	169		102		91	96	57	70	57	63	68	92
singleVariantTiles_03621	501		378		333	289	260	315	305	260	277	261
singleVariantTiles_03622	529		334		299	330	261	250	267	287	293	256
singleVariantTiles_03623	1306		1070		941	834	785	1011	821	830	788	786
singleVariantTiles_03624	1388		1103		930	947	819	886	812	848	757	801
singleVariantTiles_03625	329		283		254	237	98	168	154	143	119	111
singleVariantTiles_03626	333		262		277	231	132	135	130	129	86	95
singleVariantTiles_03627	835		599		556	564	248	280	219	164	177	242
singleVariantTiles_03628	908		631		581	616	227	271	240	192	186	219
singleVariantTiles_03629	835		676		647	536	224	297	242	274	163	170
singleVariantTiles_03630	771		581		534	456	215	198	204	215	101	179
singleVariantTiles_03631	203		169		125	114	36	38	28	35	14	20
singleVariantTiles_03632	280		160		177	155	33	25	23	40	20	26
singleVariantTiles_03651	2191		1547		1467	1335	259	303	236	244	145	218
singleVariantTiles_03652	1700		1268		1228	1008	192	194	179	210	157	187
singleVariantTiles_03653	1784		1428		1191	1132	312	407	335	362	220	280
singleVariantTiles_03654	1480		1056		907	843	285	296	259	266	149	210
singleVariantTiles_03677	1144		837		806	735	156	166	176	245	156	209
singleVariantTiles_03678	1420		1022		899	913	176	226	223	200	141	185
singleVariantTiles_03683	766		531		501	406	360	391	356	360	311	329
singleVariantTiles_03684	997		637		601	567	561	603	476	535	504	518
singleVariantTiles_03691	76		58		58	42	20	9	14	12	14	32
singleVariantTiles_03692	72		61		45	36	6	13	5	11	14	25
singleVariantTiles_03693	1054		797		682	661	420	500	409	415	176	282
singleVariantTiles_03694	278		199		172	141	124	103	113	97	58	66
singleVariantTiles_03699	986		732		729	679	176	211	212	179	271	403
singleVariantTiles_03700	757		643		554	589	160	151	187	146	265	329
singleVariantTiles_03719	598		472		403	370	156	184	179	169	132	215
singleVariantTiles_03720	384		314		289	276	105	142	114	115	112	157
singleVariantTiles_03721	205		164		145	108	47	54	64	61	40	68
singleVariantTiles_03722	191		175		198	143	80	76	45	55	53	80
singleVariantTiles_03723	167		109		100	104	33	69	48	80	22	24
singleVariantTiles_03724	141		121		92	68	40	44	58	66	17	20
singleVariantTiles_03725	202		161		128	119	90	138	80	70	48	59
singleVariantTiles_03726	250		181		166	129	90	88	77	125	41	69
singleVariantTiles_03733	189		174		129	146	30	25	34	32	35	46
singleVariantTiles_03734	180		125		135	120	39	31	29	28	35	64
singleVariantTiles_03735	21		17		3	4	5	3	2	5	1	11
singleVariantTiles_03736	38		19		19	25	17	6	10	7	7	15
singleVariantTiles_03737	144		183		156	173	32	37	64	48	32	56
singleVariantTiles_03738	204		117		137	148	48	51	29	29	19	35
singleVariantTiles_03739	2153		1675		1494	1402	593	762	611	572	593	749
singleVariantTiles_03740	1700		1230		1231	1068	436	595	456	517	447	625
singleVariantTiles_03749	880		661		574	529	312	307	306	292	106	154
singleVariantTiles_03750	957		760		623	511	329	358	335	342	132	152
singleVariantTiles_03763	10		5		0	1	6	3	1	6	4	3
singleVariantTiles_03764	6		4		6	3	3	2	4	4	6	5
singleVariantTiles_03787	376		302		274	270	126	165	124	159	134	148
singleVariantTiles_03788	347		310		300	245	109	155	124	128	141	113
singleVariantTiles_03795	885		642		603	627	291	305	281	261	162	225
singleVariantTiles_03796	1033		840		746	624	289	377	349	344	185	250
singleVariantTiles_03799	180		144		105	79	67	87	66	72	24	44
singleVariantTiles_03800	145		87		105	63	48	48	42	51	20	36
singleVariantTiles_03851	50		62		30	32	20	21	25	8	18	17
singleVariantTiles_03852	152		118		98	133	53	57	37	57	29	46
singleVariantTiles_03866	8		4		7	7	3	2	0	4	8	0
singleVariantTiles_03867	46		45		35	40	98	128	96	114	127	148
singleVariantTiles_03868	47		50		35	30	75	107	138	63	105	95
singleVariantTiles_03869	42		24		26	40	43	55	49	48	72	84
singleVariantTiles_03870	18		31		24	18	42	54	46	43	24	51
singleVariantTiles_03871	50		45		45	28	64	50	80	49	52	53
singleVariantTiles_03872	8		14		11	4	4	8	2	7	17	10
singleVariantTiles_03873	340		194		171	168	189	175	138	144	103	131
singleVariantTiles_03874	217		184		174	146	143	184	143	169	113	102
singleVariantTiles_03883	24172		18259		17185	16881	17727	20279	17831	14171	30698	49440
singleVariantTiles_03884	22057		16253		14768	14979	10800	12953	11144	9688	15602	25643
singleVariantTiles_03885	11		6		8	4	4	5	13	5	9	33
singleVariantTiles_03886	13		10		3	8	15	11	11	6	14	11
singleVariantTiles_03891	103		90		55	68	70	88	61	68	61	58
singleVariantTiles_03892	168		109		116	119	93	93	63	73	67	86
singleVariantTiles_03921	473		299		298	280	89	89	93	104	84	122
singleVariantTiles_03922	355		309		288	232	78	91	67	75	68	102
singleVariantTiles_03927	0		0		2	0	0	1	0	1	1	0
singleVariantTiles_03928	0		0		0	0	0	2	0	0	0	0
singleVariantTiles_03953	513		390		319	290	182	195	197	176	73	99
singleVariantTiles_03954	653		425		385	363	246	262	209	274	79	122
singleVariantTiles_03955	127		87		66	57	28	57	42	58	20	18
singleVariantTiles_03956	145		97		91	97	42	54	36	49	18	30
singleVariantTiles_03965	2245		1670		1579	1347	673	822	632	783	393	530
singleVariantTiles_03966	2340		1622		1489	1265	781	740	736	768	503	539
singleVariantTiles_03967	82		77		63	54	27	18	10	24	22	41
singleVariantTiles_03968	79		77		75	52	32	40	50	49	48	43
singleVariantTiles_03969	112		69		75	46	57	84	58	45	57	61
singleVariantTiles_03970	142		114		126	93	81	137	101	116	124	141
singleVariantTiles_03971	59		34		29	16	5	5	3	6	6	5
singleVariantTiles_03972	108		76		76	43	5	10	6	9	5	7
singleVariantTiles_03973	555		429		406	374	37	54	39	66	44	61
singleVariantTiles_03974	688		548		532	468	64	53	54	90	55	64
singleVariantTiles_03975	1488		1140		1141	1012	233	355	271	273	192	290
singleVariantTiles_03976	1365		1053		871	903	265	295	235	306	199	242
singleVariantTiles_03981	317		307		237	168	92	78	81	85	35	61
singleVariantTiles_03982	260		224		215	136	62	61	60	63	31	46
singleVariantTiles_03983	210		167		178	168	127	144	117	138	146	138
singleVariantTiles_03984	269		211		174	156	122	125	129	139	110	138
singleVariantTiles_03987	414		342		243	257	92	109	98	107	39	97
singleVariantTiles_03988	427		327		231	229	109	102	79	104	59	60
singleVariantTiles_03989	20		17		14	13	7	16	7	8	9	6
singleVariantTiles_03990	12		19		12	12	2	1	9	4	3	1
singleVariantTiles_03991	1142		894		872	769	340	366	318	342	196	292
singleVariantTiles_03992	1245		1043		881	789	429	452	427	409	220	315
singleVariantTiles_03993	2301		1872		1546	1430	688	732	656	697	422	612
singleVariantTiles_03994	3235		2446		2080	1851	982	1036	941	930	611	847
singleVariantTiles_03995	2207		1684		1428	1261	674	753	686	723	335	518
singleVariantTiles_03996	2267		1749		1472	1413	654	678	626	640	320	504
singleVariantTiles_03997	575		461		423	355	273	337	296	292	257	223
singleVariantTiles_03998	784		668		474	537	349	451	412	415	272	306
singleVariantTiles_03999	2104		1543		1370	1380	769	852	708	830	674	763
singleVariantTiles_04000	2427		1821		1639	1410	885	1030	828	942	849	889
singleVariantTiles_04007	623		509		494	402	205	245	223	197	105	121
singleVariantTiles_04008	610		499		413	392	207	225	210	206	103	132
singleVariantTiles_04033	234		194		150	158	65	67	69	69	23	56
singleVariantTiles_04034	229		167		154	151	62	43	33	58	28	22
singleVariantTiles_04047	215		140		135	124	14	20	11	11	24	23
singleVariantTiles_04048	186		180		150	127	17	27	23	16	20	25
singleVariantTiles_04065	365		220		232	240	99	92	90	121	118	139
singleVariantTiles_04066	330		247		237	238	110	91	75	84	92	124
singleVariantTiles_04075	574		420		336	358	121	125	113	130	59	71
singleVariantTiles_04076	465		315		245	207	72	76	92	77	45	58
singleVariantTiles_04097	142		98		91	103	127	117	113	119	129	118
singleVariantTiles_04098	631		425		399	425	541	529	559	486	467	525
singleVariantTiles_04099	137		108		79	74	70	72	114	69	57	59
singleVariantTiles_04100	115		83		67	46	51	72	73	59	60	32
singleVariantTiles_04103	378		282		224	199	124	166	112	111	94	107
singleVariantTiles_04104	337		315		236	209	144	138	160	129	101	91
singleVariantTiles_04109	2360		1880		1841	1448	1310	1436	1219	1361	978	1172
singleVariantTiles_04110	2649		1880		1693	1579	1336	1386	1330	1351	1053	1265
singleVariantTiles_04115	704		543		478	417	174	156	133	158	91	130
singleVariantTiles_04116	539		428		379	355	148	141	126	138	88	113
singleVariantTiles_04151	193		174		133	111	30	43	39	44	18	27
singleVariantTiles_04152	207		120		165	120	34	45	33	38	30	28
singleVariantTiles_04153	133		114		81	115	32	45	41	41	27	36
singleVariantTiles_04154	192		104		97	98	66	78	46	49	39	47
singleVariantTiles_04189	735		588		544	475	286	331	294	318	253	218
singleVariantTiles_04190	599		514		450	444	240	328	301	252	226	232
singleVariantTiles_04209	624		495		512	452	182	229	170	209	249	317
singleVariantTiles_04210	586		473		451	408	167	193	180	166	149	217
singleVariantTiles_04227	180		137		145	117	79	92	74	93	33	45
singleVariantTiles_04228	219		185		187	176	93	112	61	65	49	59
singleVariantTiles_04239	987		750		668	597	343	346	328	314	214	304
singleVariantTiles_04240	1092		806		754	629	362	418	361	392	234	347
singleVariantTiles_04241	704		594		535	465	451	535	517	606	483	574
singleVariantTiles_04242	1086		909		756	693	884	1146	895	1050	891	854
singleVariantTiles_04243	1184		970		835	768	363	437	356	404	248	361
singleVariantTiles_04244	780		611		517	538	189	236	208	198	157	190
singleVariantTiles_04245	281		213		196	171	85	91	64	92	37	80
singleVariantTiles_04246	390		277		297	238	110	133	118	97	71	82
singleVariantTiles_04247	800		548		524	468	154	237	168	142	97	131
singleVariantTiles_04248	853		718		576	528	212	257	222	251	111	181
singleVariantTiles_04249	3612		2768		2508	2298	782	936	818	798	524	652
singleVariantTiles_04250	4596		3458		3031	2844	1144	1405	1230	1245	819	1066
singleVariantTiles_04251	217		190		139	130	63	74	51	63	35	56
singleVariantTiles_04252	262		165		147	165	80	66	71	57	37	54
singleVariantTiles_04253	107		81		81	77	35	62	32	42	35	41
singleVariantTiles_04254	162		114		146	127	77	84	45	63	42	58
singleVariantTiles_04255	368		318		288	255	103	87	106	107	67	82
singleVariantTiles_04256	424		303		298	234	104	88	119	121	69	95
singleVariantTiles_04257	68		54		58	55	15	37	22	28	13	16
singleVariantTiles_04258	98		76		62	55	32	30	28	38	10	18
singleVariantTiles_04259	284		201		185	153	77	72	64	60	44	64
singleVariantTiles_04260	236		168		165	135	75	76	77	67	39	59
singleVariantTiles_04261	522		407		406	359	287	296	247	307	333	305
singleVariantTiles_04262	792		594		490	487	399	406	323	327	301	380
singleVariantTiles_04325	293		225		210	220	66	62	64	68	48	61
singleVariantTiles_04326	325		201		255	188	89	81	64	80	47	58
singleVariantTiles_04327	15		31		19	24	57	76	128	56	75	100
singleVariantTiles_04328	14		8		23	13	31	20	54	31	51	27
singleVariantTiles_04329	20		11		19	11	6	3	3	6	16	12
singleVariantTiles_04330	10		7		7	8	3	7	1	3	7	3
singleVariantTiles_04337	2		5		2	1	0	5	0	2	1	1
singleVariantTiles_04338	9		10		9	10	3	13	5	2	0	2
singleVariantTiles_04363	1244		934		817	735	385	431	424	332	283	603
singleVariantTiles_04364	1086		945		783	725	354	420	410	360	278	548
singleVariantTiles_04367	49		36		49	43	18	8	18	17	22	21
singleVariantTiles_04368	21		24		23	31	9	19	9	9	16	8
singleVariantTiles_04369	50		27		48	36	27	40	23	32	35	47
singleVariantTiles_04370	72		54		39	32	36	52	38	32	31	29
singleVariantTiles_04381	226		172		134	148	98	100	126	83	98	154
singleVariantTiles_04382	257		246		216	188	117	180	131	120	187	260
singleVariantTiles_04387	1146		804		710	724	214	212	206	200	88	183
singleVariantTiles_04388	791		641		578	500	153	181	167	161	101	157
singleVariantTiles_04391	2906		2326		2005	1836	944	1149	1036	1021	514	719
singleVariantTiles_04392	3683		2778		2485	2402	1210	1446	1285	1279	615	873
singleVariantTiles_04393	39		47		25	36	15	21	18	17	9	11
singleVariantTiles_04394	11		25		15	14	0	8	11	13	2	7
singleVariantTiles_04403	536		434		401	341	160	203	173	174	109	136
singleVariantTiles_04404	688		493		477	410	206	266	211	243	153	150
singleVariantTiles_04437	555		482		368	309	165	230	210	173	124	170
singleVariantTiles_04438	654		537		448	401	230	233	256	253	149	208
singleVariantTiles_04441	122		154		125	122	27	53	46	48	35	35
singleVariantTiles_04442	180		146		113	104	42	51	35	45	27	29
singleVariantTiles_04451	556		415		385	315	230	248	194	192	84	126
singleVariantTiles_04452	664		445		462	394	239	288	200	271	85	160
singleVariantTiles_04463	63		37		30	40	26	28	33	22	9	29
singleVariantTiles_04464	68		57		40	30	38	38	40	21	9	14
singleVariantTiles_04483	488		343		400	319	203	224	191	206	165	173
singleVariantTiles_04484	539		409		361	347	236	263	257	222	115	170
singleVariantTiles_04489	148		147		97	91	55	34	45	37	24	30
singleVariantTiles_04490	202		121		149	109	60	63	34	32	35	24
singleVariantTiles_04505	108		95		89	61	37	58	50	34	40	37
singleVariantTiles_04506	137		104		76	70	58	90	59	41	38	53
singleVariantTiles_04513	812		625		541	501	304	313	282	326	254	263
singleVariantTiles_04514	850		555		549	546	298	354	279	297	283	267
singleVariantTiles_04517	295		186		199	169	48	59	32	31	24	20
singleVariantTiles_04518	219		140		180	153	38	54	25	34	19	36
singleVariantTiles_04531	252		169		136	125	31	34	33	24	20	35
singleVariantTiles_04532	258		184		169	136	26	24	25	24	34	26
singleVariantTiles_04541	74		42		47	42	10	5	8	11	8	6
singleVariantTiles_04542	66		46		32	33	7	5	11	10	6	9
singleVariantTiles_04543	879		719		488	557	239	251	227	237	101	146
singleVariantTiles_04544	947		783		672	573	219	262	219	260	105	155
singleVariantTiles_04545	1053		884		785	698	299	347	339	341	161	211
singleVariantTiles_04546	1211		932		880	825	385	459	389	365	197	263
singleVariantTiles_04549	360		240		202	162	55	47	54	60	23	40
singleVariantTiles_04550	248		212		183	142	61	64	65	50	22	39
singleVariantTiles_04551	506		398		328	302	173	226	219	200	168	200
singleVariantTiles_04552	411		361		318	307	191	232	189	210	156	212
singleVariantTiles_04567	338		279		333	216	767	789	814	926	925	830
singleVariantTiles_04568	453		314		391	323	948	1297	1042	1345	1241	1085
singleVariantTiles_04577	99		134		118	115	182	263	192	200	232	276
singleVariantTiles_04578	161		121		116	123	258	281	293	357	284	340
singleVariantTiles_04606	5		7		4	2	3	0	4	0	4	3
singleVariantTiles_04607	814		664		555	587	383	399	373	371	353	375
singleVariantTiles_04608	770		631		591	522	322	371	376	398	395	388
singleVariantTiles_04615	971		642		674	580	201	195	199	219	112	133
singleVariantTiles_04616	865		613		597	534	173	199	173	172	124	121
singleVariantTiles_04627	255		204		153	142	41	34	36	42	23	39
singleVariantTiles_04628	256		165		184	160	32	49	21	43	19	37
singleVariantTiles_04641	238		148		145	150	73	70	60	56	66	85
singleVariantTiles_04642	309		291		241	200	100	117	101	114	91	107
singleVariantTiles_04643	242		171		140	163	75	97	87	102	72	83
singleVariantTiles_04644	238		156		185	132	84	134	91	107	93	100
singleVariantTiles_04651	464		398		372	367	221	311	220	239	212	226
singleVariantTiles_04652	258		186		187	158	132	116	101	133	120	130
singleVariantTiles_04655	1119		863		804	700	125	140	142	146	157	214
singleVariantTiles_04656	658		585		520	471	102	116	92	105	122	159
singleVariantTiles_04657	258		237		169	155	209	225	228	177	168	234
singleVariantTiles_04658	180		144		143	114	137	153	158	149	146	115
singleVariantTiles_04659	74		59		54	66	85	81	110	80	71	67
singleVariantTiles_04660	46		37		33	45	42	83	62	44	49	67
singleVariantTiles_04661	68		59		26	34	15	7	13	13	11	14
singleVariantTiles_04662	52		26		41	51	3	9	6	10	10	12
singleVariantTiles_04663	380		228		223	247	141	182	149	130	140	161
singleVariantTiles_04664	248		224		200	200	90	89	107	117	75	117
singleVariantTiles_04665	1521		1153		1143	1021	625	652	605	592	515	669
singleVariantTiles_04666	3819		2975		2712	2429	1537	1646	1481	1472	1385	1732
singleVariantTiles_04667	424		355		292	254	173	187	160	183	78	122
singleVariantTiles_04668	394		280		288	243	136	176	179	158	81	102
singleVariantTiles_04669	113		77		77	85	93	92	97	68	69	108
singleVariantTiles_04670	141		112		71	107	138	135	144	103	87	151
singleVariantTiles_04671	16		13		11	9	9	8	3	3	7	6
singleVariantTiles_04672	13		12		5	15	2	13	15	24	17	27
singleVariantTiles_04673	85		64		73	56	61	68	50	84	74	58
singleVariantTiles_04674	92		87		70	83	65	93	96	73	85	72
singleVariantTiles_04675	111		65		93	61	45	45	42	29	31	56
singleVariantTiles_04676	115		109		75	79	53	67	56	49	66	49
singleVariantTiles_04677	1377		984		934	897	476	461	393	297	435	559
singleVariantTiles_04678	472		362		322	287	207	182	147	126	149	184
singleVariantTiles_04685	411		332		277	300	766	735	808	929	943	753
singleVariantTiles_04686	356		243		236	224	608	641	557	682	601	632
singleVariantTiles_04711	1067		900		786	680	72	93	91	85	87	96
singleVariantTiles_04712	1118		886		755	700	83	100	104	76	61	109
singleVariantTiles_04721	218		153		160	120	51	38	45	48	21	33
singleVariantTiles_04722	412		339		275	289	78	102	68	84	48	58
singleVariantTiles_04725	550		353		346	266	160	141	125	163	87	107
singleVariantTiles_04726	572		411		399	341	205	239	187	202	109	123
singleVariantTiles_04727	96		107		62	71	46	46	37	57	15	35
singleVariantTiles_04728	184		113		113	81	75	72	55	70	33	37
singleVariantTiles_04729	1026		811		653	586	398	396	355	360	134	244
singleVariantTiles_04730	767		709		619	541	276	355	276	308	137	194
singleVariantTiles_04731	445		312		280	242	149	141	114	120	55	65
singleVariantTiles_04732	431		339		319	277	150	156	112	139	62	102
singleVariantTiles_04733	162		110		118	75	44	60	40	29	27	27
singleVariantTiles_04734	149		139		91	98	37	37	32	47	12	20
singleVariantTiles_04735	164		138		104	84	50	52	49	46	33	36
singleVariantTiles_04736	228		132		150	132	62	95	69	76	37	42
singleVariantTiles_04737	184		112		96	77	36	20	30	38	17	14
singleVariantTiles_04738	138		96		101	83	24	18	18	20	13	11
singleVariantTiles_04739	287		226		180	207	58	49	40	50	32	39
singleVariantTiles_04740	240		169		197	165	41	47	39	44	23	45
singleVariantTiles_04741	521		438		375	297	108	142	95	91	59	96
singleVariantTiles_04742	449		343		338	295	78	94	73	96	59	68
singleVariantTiles_04743	307		245		238	224	54	75	89	93	50	96
singleVariantTiles_04744	257		230		183	194	59	78	90	83	35	76
singleVariantTiles_04745	1352		1088		977	959	1070	1220	1110	1072	1271	1742
singleVariantTiles_04746	1779		1277		1402	1200	1892	2226	1857	1659	2894	3953
singleVariantTiles_04747	1738		1442		1343	1156	810	1099	993	1114	833	1020
singleVariantTiles_04748	1271		1048		971	811	681	859	730	744	610	834
singleVariantTiles_04797	335		244		222	183	133	158	130	110	73	99
singleVariantTiles_04798	372		292		214	217	159	152	147	152	64	74
singleVariantTiles_04801	642		532		422	390	236	334	225	230	112	191
singleVariantTiles_04802	709		505		434	383	247	261	251	280	127	188
singleVariantTiles_04803	643		533		485	389	303	336	287	305	129	207
singleVariantTiles_04804	800		633		585	468	420	423	350	399	182	304
singleVariantTiles_04807	179		151		140	128	49	69	33	50	43	46
singleVariantTiles_04808	233		157		152	120	69	84	66	70	63	54
singleVariantTiles_04809	302		250		238	192	88	108	94	99	66	95
singleVariantTiles_04810	182		156		125	117	45	39	46	56	31	55
singleVariantTiles_04811	382		341		247	220	112	134	123	134	68	77
singleVariantTiles_04812	475		376		350	278	162	169	151	159	82	108
singleVariantTiles_04815	1623		1297		1160	1102	785	956	874	880	657	751
singleVariantTiles_04816	1882		1548		1376	1203	972	1087	1056	1015	819	873
singleVariantTiles_04817	3618		2649		2447	2306	1138	1229	1006	1227	862	1026
singleVariantTiles_04818	3774		2855		2730	2488	1095	1323	1063	1166	829	1065
singleVariantTiles_04829	150		119		106	117	51	56	61	77	32	55
singleVariantTiles_04830	177		113		88	108	55	63	50	77	28	49
singleVariantTiles_04849	929		720		626	537	132	108	128	134	117	154
singleVariantTiles_04850	875		707		618	515	123	127	143	123	126	152
singleVariantTiles_04855	256		191		188	154	199	211	178	208	224	187
singleVariantTiles_04856	265		229		157	156	246	229	223	207	183	186
singleVariantTiles_04857	353		258		275	224	94	97	96	87	48	56
singleVariantTiles_04858	319		243		206	160	63	70	60	66	46	42
singleVariantTiles_04859	476		327		323	265	173	219	157	181	87	89
singleVariantTiles_04860	523		415		363	328	161	242	175	178	88	137
singleVariantTiles_04861	134		74		82	80	55	64	44	54	28	48
singleVariantTiles_04862	125		57		70	69	39	35	45	33	33	46
singleVariantTiles_04867	1384		1037		999	831	747	869	769	674	898	1125
singleVariantTiles_04868	1364		1131		960	918	728	819	700	661	884	1227
singleVariantTiles_04869	593		475		433	319	278	274	244	270	244	346
singleVariantTiles_04870	643		438		428	449	233	284	218	221	148	236
singleVariantTiles_04871	2038		1534		1409	1256	402	438	393	382	440	549
singleVariantTiles_04872	1791		1317		1249	1126	331	381	293	319	346	474
singleVariantTiles_04875	256		203		182	182	200	176	202	230	237	209
singleVariantTiles_04876	204		168		123	156	155	187	163	182	152	162
singleVariantTiles_04889	207		156		164	117	58	97	57	98	49	44
singleVariantTiles_04890	177		154		159	139	69	99	85	89	44	65
singleVariantTiles_04895	37		34		31	20	21	21	38	50	28	31
singleVariantTiles_04896	55		46		35	23	31	34	26	27	24	19
singleVariantTiles_04897	63		31		27	30	48	35	30	22	25	39
singleVariantTiles_04898	111		82		70	62	44	85	71	72	57	69
singleVariantTiles_04899	271		238		214	155	103	118	125	112	58	78
singleVariantTiles_04900	541		366		362	282	207	175	148	174	98	160
singleVariantTiles_04901	207		164		130	103	73	74	83	69	40	58
singleVariantTiles_04902	385		269		293	238	92	140	103	130	74	101
singleVariantTiles_04903	195		174		166	142	67	98	92	81	53	80
singleVariantTiles_04904	171		170		116	121	79	75	66	90	37	51
singleVariantTiles_04905	280		234		247	184	118	155	109	118	56	74
singleVariantTiles_04906	212		123		163	154	92	97	58	85	45	68
singleVariantTiles_04907	570		514		405	350	172	231	155	204	94	127
singleVariantTiles_04908	658		568		424	416	210	271	214	224	108	201
singleVariantTiles_04909	287		246		206	187	124	194	108	131	77	91
singleVariantTiles_04910	246		188		170	124	109	91	113	118	51	58
singleVariantTiles_04911	4		2		1	0	6	3	0	8	8	2
singleVariantTiles_04913	4		1		2	3	2	3	1	7	4	7
singleVariantTiles_04914	4		5		0	3	12	8	11	14	1	5
singleVariantTiles_04915	19		8		8	17	12	8	11	9	11	19
singleVariantTiles_04916	9		7		9	3	14	2	6	5	9	9
singleVariantTiles_04917	58		63		35	55	14	7	10	15	8	12
singleVariantTiles_04918	74		76		73	59	8	11	12	21	12	22
singleVariantTiles_04957	38		31		24	16	2	12	8	4	7	8
singleVariantTiles_04958	17		12		17	11	6	1	7	1	4	5
singleVariantTiles_04973	666		509		473	455	240	253	227	237	115	175
singleVariantTiles_04974	772		537		505	456	301	323	226	264	121	162
singleVariantTiles_04983	367		217		246	266	776	923	694	714	761	698
singleVariantTiles_04984	354		283		280	260	747	796	814	838	893	614
singleVariantTiles_04985	311		210		193	202	714	679	545	625	635	576
singleVariantTiles_04986	220		171		205	161	555	514	590	682	587	594
singleVariantTiles_04987	406		299		317	289	828	751	805	868	852	763
singleVariantTiles_04988	418		251		303	263	786	843	778	1029	872	768
singleVariantTiles_04989	265		186		215	147	357	465	407	448	418	438
singleVariantTiles_04990	240		175		196	151	384	386	320	440	445	383
singleVariantTiles_04995	130		85		105	72	49	76	41	54	49	35
singleVariantTiles_04996	162		105		116	85	56	68	58	68	42	50
singleVariantTiles_04997	47		28		18	27	18	25	9	8	7	6
singleVariantTiles_04998	25		21		21	15	14	22	5	18	5	5
singleVariantTiles_05001	170		119		126	89	34	43	50	42	35	34
singleVariantTiles_05002	220		166		159	145	48	43	65	58	51	58
singleVariantTiles_05005	386		257		241	227	100	96	92	96	116	100
singleVariantTiles_05006	290		234		233	197	59	86	104	114	91	93
singleVariantTiles_05025	1064		852		773	705	293	324	314	328	303	366
singleVariantTiles_05026	1169		927		855	803	369	421	362	354	356	439
singleVariantTiles_05027	134		88		88	71	67	67	76	64	21	37
singleVariantTiles_05028	141		119		113	83	57	81	66	72	52	77
singleVariantTiles_05037	597		454		467	387	1792	2275	2041	1897	2428	2018
singleVariantTiles_05038	560		368		404	343	1657	1639	1633	1678	1763	1695
singleVariantTiles_05039	1048		768		732	632	1472	1531	1513	1486	1578	1742
singleVariantTiles_05040	728		584		606	494	926	1197	1114	1213	1290	1330
singleVariantTiles_05053	220		164		139	145	45	34	37	46	32	41
singleVariantTiles_05054	292		233		206	200	51	46	59	49	56	72
singleVariantTiles_05107	645		493		436	422	134	140	141	154	100	147
singleVariantTiles_05108	689		495		449	415	209	207	164	198	183	215
singleVariantTiles_05111	407		283		238	272	1010	1099	779	873	944	1309
singleVariantTiles_05112	331		254		233	222	525	758	506	486	633	834
singleVariantTiles_05117	10		9		13	1	4	4	3	2	10	11
singleVariantTiles_05118	8		2		1	3	1	4	3	3	6	4
singleVariantTiles_05119	1851		1470		1453	1288	896	895	906	595	969	2051
singleVariantTiles_05120	2518		1860		1868	1768	1324	1201	1145	965	1387	3031
singleVariantTiles_05137	836		569		567	497	595	728	623	640	593	530
singleVariantTiles_05138	761		699		536	587	549	731	692	634	530	563
singleVariantTiles_05139	140		129		117	85	53	69	63	58	71	90
singleVariantTiles_05140	268		175		191	184	88	83	104	115	112	159
singleVariantTiles_05141	69		58		44	35	66	53	50	44	51	75
singleVariantTiles_05142	89		87		51	59	52	42	52	43	66	117
singleVariantTiles_05143	177		95		91	80	75	83	75	75	81	119
singleVariantTiles_05144	161		127		127	98	62	51	56	54	42	62
singleVariantTiles_05145	579		453		451	430	834	1064	877	810	1018	1288
singleVariantTiles_05146	474		405		384	378	728	856	773	679	795	1061
singleVariantTiles_05147	12		2		13	1	5	14	11	12	17	9
singleVariantTiles_05148	13		16		8	6	8	17	15	16	10	35
singleVariantTiles_05149	41		41		32	29	11	5	11	12	15	19
singleVariantTiles_05150	77		36		28	49	16	11	11	12	24	29
singleVariantTiles_05181	315		243		217	185	122	160	116	96	72	89
singleVariantTiles_05182	434		282		308	279	150	158	153	172	99	105
singleVariantTiles_05189	306		228		208	179	88	94	109	102	110	97
singleVariantTiles_05190	331		273		252	219	93	106	115	104	114	121
singleVariantTiles_05195	2150		1777		1650	1429	1179	1278	1088	1205	934	977
singleVariantTiles_05196	1922		1547		1332	1241	984	991	917	932	770	793
singleVariantTiles_05197	1845		1372		1295	1111	254	275	218	256	138	208
singleVariantTiles_05198	1555		1204		1150	1020	200	252	219	234	135	206
singleVariantTiles_05199	1046		782		731	651	182	231	199	201	114	164
singleVariantTiles_05200	1070		869		782	701	206	257	186	211	129	170
singleVariantTiles_05201	992		827		693	604	174	232	197	210	121	146
singleVariantTiles_05202	925		743		707	564	141	173	174	178	100	117
singleVariantTiles_05215	3		7		4	5	0	1	0	6	4	4
singleVariantTiles_05216	10		7		4	9	5	11	7	7	2	5
singleVariantTiles_05217	718		558		590	475	382	498	377	310	410	611
singleVariantTiles_05218	721		494		533	444	305	351	280	250	312	430
singleVariantTiles_05219	187		150		110	129	39	36	32	35	19	31
singleVariantTiles_05220	125		97		116	82	28	23	34	32	21	26
singleVariantTiles_05227	258		206		173	162	50	47	43	55	32	43
singleVariantTiles_05228	235		209		159	158	55	49	42	52	36	59
singleVariantTiles_05229	1		1		0	1	1	3	1	0	0	0
singleVariantTiles_05230	1		4		2	0	0	1	0	1	1	0
singleVariantTiles_05235	550		389		393	327	156	140	176	180	181	176
singleVariantTiles_05236	402		343		285	259	118	148	141	126	159	191
singleVariantTiles_05241	187		142		136	110	30	29	23	27	13	22
singleVariantTiles_05242	170		104		114	102	19	22	20	23	13	20
singleVariantTiles_05243	527		397		345	261	106	152	156	116	81	109
singleVariantTiles_05244	504		358		336	309	126	156	126	130	99	119
singleVariantTiles_05245	734		530		508	431	240	258	223	237	149	187
singleVariantTiles_05246	815		553		500	469	184	272	200	206	157	185
singleVariantTiles_05257	36		22		25	9	37	19	14	25	22	24
singleVariantTiles_05258	12		10		24	20	11	24	20	18	19	20
singleVariantTiles_05281	381		342		364	264	108	95	81	105	64	101
singleVariantTiles_05282	390		324		306	290	86	82	104	111	61	80
singleVariantTiles_05303	2011		1606		1477	1355	903	1022	1004	1046	845	828
singleVariantTiles_05304	1607		1301		1204	1144	761	896	769	820	708	703
singleVariantTiles_05339	212		156		144	118	40	41	34	35	31	39
singleVariantTiles_05340	272		211		139	153	35	43	36	34	29	36
singleVariantTiles_05341	495		332		339	305	43	74	50	58	68	81
singleVariantTiles_05342	491		327		333	310	60	38	33	68	43	56
singleVariantTiles_05349	16		12		6	5	15	17	12	7	13	10
singleVariantTiles_05350	4		5		1	3	3	8	9	5	1	4
singleVariantTiles_05355	652		517		529	399	229	258	257	239	114	161
singleVariantTiles_05356	663		476		400	402	211	250	249	228	108	163
singleVariantTiles_05357	4		3		1	4	2	0	6	2	5	1
singleVariantTiles_05358	16		3		4	2	5	7	4	13	1	1
singleVariantTiles_05359	1954		1577		1365	1182	663	731	668	687	293	411
singleVariantTiles_05360	1993		1586		1381	1240	628	754	722	771	302	396
singleVariantTiles_05361	431		383		338	271	173	223	167	182	69	100
singleVariantTiles_05362	577		407		361	332	190	271	178	198	85	108
singleVariantTiles_05363	336		231		246	226	92	95	84	95	26	60
singleVariantTiles_05364	425		318		263	229	94	118	99	101	46	58
singleVariantTiles_05381	1104		950		839	747	1334	1337	1388	1484	1258	1365
singleVariantTiles_05382	1256		1027		830	837	1386	1687	1519	1535	1321	1333
singleVariantTiles_05423	377		267		262	254	120	170	124	146	62	138
singleVariantTiles_05424	425		357		311	249	144	181	155	192	101	112
singleVariantTiles_05425	2133		1716		1477	1247	801	853	787	833	370	545
singleVariantTiles_05426	2939		2260		1897	1757	1082	1284	1067	1107	524	770
singleVariantTiles_05437	299		266		266	255	653	748	707	598	947	899
singleVariantTiles_05438	276		214		247	207	449	551	465	518	725	635
singleVariantTiles_05439	162		162		164	132	141	147	162	182	179	256
singleVariantTiles_05440	225		195		126	195	201	157	209	171	204	318
singleVariantTiles_05457	867		641		581	560	677	702	673	631	602	940
singleVariantTiles_05458	1026		780		757	697	745	962	772	744	801	1107
singleVariantTiles_05465	231		107		114	112	152	175	122	165	153	136
singleVariantTiles_05466	194		132		148	140	168	153	122	164	129	149
singleVariantTiles_05469	410		299		290	323	182	179	150	177	88	142
singleVariantTiles_05470	401		347		291	262	149	184	150	154	129	143
singleVariantTiles_05471	243		196		158	144	91	119	90	84	49	69
singleVariantTiles_05472	281		231		230	211	102	86	111	103	88	96
singleVariantTiles_05473	45		36		37	24	6	13	10	12	13	11
singleVariantTiles_05474	25		21		32	22	5	6	2	7	7	7
singleVariantTiles_05481	588		417		383	430	317	339	265	353	289	368
singleVariantTiles_05482	456		324		360	286	218	247	206	248	229	291
singleVariantTiles_05483	608		529		484	452	193	187	152	183	146	194
singleVariantTiles_05484	603		452		422	386	163	175	173	146	131	187
singleVariantTiles_05497	681		523		440	425	277	334	287	355	140	187
singleVariantTiles_05498	446		380		322	340	172	231	176	244	83	154
singleVariantTiles_05509	149		94		69	80	71	72	33	45	45	99
singleVariantTiles_05510	197		152		117	122	144	131	141	114	88	168
singleVariantTiles_05517	998		734		716	674	265	313	363	328	237	285
singleVariantTiles_05518	1014		772		672	630	296	302	289	320	242	311
singleVariantTiles_05521	272		200		184	151	38	39	31	40	31	23
singleVariantTiles_05522	186		185		143	130	26	33	34	29	14	36
singleVariantTiles_05525	243		195		149	168	71	80	67	84	36	65
singleVariantTiles_05526	294		194		216	185	115	110	98	89	45	63
singleVariantTiles_05539	441		311		314	254	135	147	117	131	113	122
singleVariantTiles_05540	540		427		426	389	166	187	157	190	181	222
singleVariantTiles_05541	694		596		520	406	510	583	594	479	515	525
singleVariantTiles_05542	761		539		504	482	541	672	490	610	532	540
singleVariantTiles_05543	509		367		365	331	194	247	223	219	143	194
singleVariantTiles_05544	379		223		247	201	100	132	103	122	61	99
singleVariantTiles_05545	321		260		203	203	166	211	196	143	156	236
singleVariantTiles_05546	323		223		219	180	219	191	219	160	169	258
singleVariantTiles_05547	130		125		88	98	100	100	126	128	109	159
singleVariantTiles_05548	144		140		108	117	108	123	160	112	110	200
singleVariantTiles_05577	588		449		437	367	52	59	52	66	61	73
singleVariantTiles_05578	745		546		538	495	61	75	80	76	78	74
singleVariantTiles_05583	524		452		376	347	38	64	61	50	54	102
singleVariantTiles_05584	636		452		421	387	65	72	65	45	82	117
singleVariantTiles_05589	259		215		181	140	46	36	40	32	29	52
singleVariantTiles_05590	230		204		141	136	50	67	64	69	37	49
singleVariantTiles_05591	1399		1050		939	791	411	426	394	402	171	229
singleVariantTiles_05592	1279		859		757	736	338	394	366	332	143	189
singleVariantTiles_05601	101		71		64	61	9	9	7	10	1	12
singleVariantTiles_05602	112		47		39	52	8	6	10	15	3	4
singleVariantTiles_05629	724		538		443	419	152	153	143	130	109	99
singleVariantTiles_05630	537		461		414	321	73	78	90	97	50	64
singleVariantTiles_05631	182		117		103	125	67	91	43	55	32	48
singleVariantTiles_05632	95		77		58	48	35	35	40	33	21	30
singleVariantTiles_05633	759		615		482	469	242	297	274	263	154	215
singleVariantTiles_05634	984		717		721	632	334	445	334	338	193	277
singleVariantTiles_05635	16		20		15	19	1	2	1	3	5	2
singleVariantTiles_05636	1117		862		842	667	219	212	181	196	141	177
singleVariantTiles_05637	23		9		16	9	5	2	3	0	5	2
singleVariantTiles_05638	52		44		48	48	15	8	8	8	10	11
singleVariantTiles_05641	2719		2017		2079	1802	783	880	702	578	1264	1773
singleVariantTiles_05642	2077		1596		1456	1359	542	671	491	331	921	1291
singleVariantTiles_05643	1510		1110		1099	1064	1263	1387	1230	927	1686	3487
singleVariantTiles_05644	1434		1128		1117	1091	1323	1497	1174	950	1816	3695
singleVariantTiles_05645	13		9		14	7	15	15	30	24	29	20
singleVariantTiles_05646	5		5		4	5	18	27	23	32	12	37
singleVariantTiles_05661	207		159		128	120	97	101	96	98	62	71
singleVariantTiles_05662	199		139		135	108	76	108	74	109	73	73
singleVariantTiles_05663	82		62		71	50	23	35	30	43	33	46
singleVariantTiles_05664	55		51		47	33	12	20	15	10	18	20
singleVariantTiles_05679	397		248		227	244	485	469	501	470	432	559
singleVariantTiles_05680	327		238		239	221	545	563	465	470	408	535
singleVariantTiles_05681	546		385		365	314	72	68	49	68	40	73
singleVariantTiles_05682	393		330		257	260	44	36	53	62	29	56
singleVariantTiles_05731	1622		1324		1249	1108	543	610	528	646	529	387
singleVariantTiles_05732	1526		1221		1171	1098	515	621	551	666	529	458
singleVariantTiles_05742	0		2		2	2	0	0	0	0	0	0
singleVariantTiles_05755	167		115		136	111	38	55	53	61	44	52
singleVariantTiles_05756	252		228		207	211	78	80	67	119	62	91
singleVariantTiles_05769	297		219		193	198	92	114	103	83	148	227
singleVariantTiles_05770	300		236		197	221	103	128	83	87	107	177
singleVariantTiles_05773	936		666		701	607	1475	1485	1445	1506	1614	1672
singleVariantTiles_05774	1199		855		882	679	1964	1835	1782	1931	1940	2069
singleVariantTiles_05783	82		48		74	39	86	120	82	130	88	119
singleVariantTiles_05784	45		35		31	31	60	50	30	47	54	59
singleVariantTiles_05797	798		698		575	550	1088	1479	1269	1070	1354	1449
singleVariantTiles_05798	780		615		662	600	1222	1560	1447	1190	1610	1604
singleVariantTiles_05821	821		638		569	547	373	472	385	360	386	404
singleVariantTiles_05822	812		576		537	535	453	376	445	408	381	440
singleVariantTiles_05831	499		334		351	344	187	207	178	190	266	329
singleVariantTiles_05832	577		443		470	405	237	212	195	215	227	312
singleVariantTiles_05845	229		182		141	159	86	146	118	87	80	85
singleVariantTiles_05846	164		123		109	98	64	103	75	53	40	50
singleVariantTiles_05861	1806		1443		1287	1259	522	718	561	559	466	548
singleVariantTiles_05862	1904		1477		1401	1220	550	623	633	559	438	537
singleVariantTiles_05881	1107		874		812	771	678	854	653	704	791	987
singleVariantTiles_05882	1203		869		898	741	634	732	717	735	803	982
singleVariantTiles_05887	127		121		138	121	84	74	98	82	133	190
singleVariantTiles_05888	434		320		284	275	218	285	238	225	305	359
singleVariantTiles_05889	111		70		67	62	35	30	35	21	29	36
singleVariantTiles_05890	117		82		57	70	27	43	31	40	33	41
singleVariantTiles_05891	234		188		152	172	63	62	55	55	65	91
singleVariantTiles_05892	218		163		144	140	59	94	52	49	36	97
singleVariantTiles_05893	133		122		99	91	10	31	32	36	10	22
singleVariantTiles_05894	120		90		110	90	30	19	24	20	20	18
singleVariantTiles_05901	522		378		358	375	170	173	135	113	109	157
singleVariantTiles_05902	608		477		411	384	177	177	170	155	130	152
singleVariantTiles_05913	163		132		92	118	53	59	60	36	67	71
singleVariantTiles_05914	220		158		155	118	98	85	90	102	101	105
singleVariantTiles_05919	0		0		1	0	0	0	0	0	0	0
singleVariantTiles_05920	2		1		2	2	0	0	0	0	0	1
singleVariantTiles_05935	7		6		2	2	5	12	5	3	4	4
singleVariantTiles_05936	0		0		0	1	0	0	0	1	0	1
singleVariantTiles_05953	3		12		3	4	2	0	1	5	0	1
singleVariantTiles_05954	13		14		15	13	0	3	8	4	4	1
singleVariantTiles_05987	272		169		145	148	36	39	40	24	28	32
singleVariantTiles_05988	158		120		101	98	21	25	19	25	18	28
singleVariantTiles_05989	508		355		349	306	109	111	145	93	105	140
singleVariantTiles_05990	495		377		340	268	116	105	118	98	115	129
singleVariantTiles_05991	222		170		131	143	48	58	56	67	50	44
singleVariantTiles_05992	181		166		131	131	41	75	64	32	48	51
singleVariantTiles_05993	495		347		306	236	135	164	129	134	69	110
singleVariantTiles_05994	632		500		427	347	183	168	175	238	110	135
singleVariantTiles_06021	473		355		304	284	101	146	96	131	86	122
singleVariantTiles_06022	617		496		446	378	171	197	178	160	138	186
singleVariantTiles_06023	1305		934		896	705	484	574	495	499	306	436
singleVariantTiles_06024	1306		981		962	804	481	601	518	531	338	440
singleVariantTiles_06025	276		171		153	145	154	169	176	167	203	154
singleVariantTiles_06026	213		209		170	138	76	96	77	73	82	88
singleVariantTiles_06051	1875		1479		1233	1140	738	870	791	755	357	482
singleVariantTiles_06052	1319		1070		869	837	556	548	521	547	245	361
singleVariantTiles_06059	311		225		194	169	115	146	111	109	38	90
singleVariantTiles_06060	595		510		377	351	203	251	228	246	93	103
singleVariantTiles_06069	2149		1545		1490	1364	1293	1447	1301	1391	1221	1149
singleVariantTiles_06070	1739		1354		1236	1143	1211	1437	1249	1344	1080	1169
singleVariantTiles_06099	155		128		120	100	607	683	603	883	757	640
singleVariantTiles_06100	204		141		155	127	674	1063	741	857	852	925
singleVariantTiles_06103	387		249		246	201	211	180	178	172	167	218
singleVariantTiles_06104	1293		963		939	813	653	741	656	737	588	660
singleVariantTiles_06105	235		176		178	163	142	156	142	111	114	162
singleVariantTiles_06106	250		190		164	135	119	107	104	112	82	114
singleVariantTiles_06107	6		7		1	3	4	9	4	0	1	3
singleVariantTiles_06108	1		1		9	0	1	1	0	0	1	1
singleVariantTiles_06109	3		5		2	3	2	14	10	12	4	4
singleVariantTiles_06112	0		0		1	0	0	0	0	0	0	0
singleVariantTiles_06113	1628		1251		1097	914	634	637	612	626	288	489
singleVariantTiles_06114	1648		1202		1202	999	639	724	573	644	347	510
singleVariantTiles_06115	156		110		128	68	84	112	55	114	70	95
singleVariantTiles_06116	173		105		130	110	89	116	99	86	91	116
singleVariantTiles_06133	48		32		39	28	16	19	19	14	21	23
singleVariantTiles_06134	38		8		36	19	12	22	2	11	15	16
singleVariantTiles_06135	74		55		60	58	9	13	15	17	16	15
singleVariantTiles_06136	124		96		70	69	14	13	25	21	18	16
singleVariantTiles_06143	41		25		23	29	16	7	13	10	3	3
singleVariantTiles_06144	5		14		11	15	1	9	8	7	4	2
singleVariantTiles_06145	224		167		194	136	104	107	82	98	90	92
singleVariantTiles_06146	213		179		136	142	88	122	97	98	85	73
singleVariantTiles_06147	497		352		325	335	346	320	321	300	326	294
singleVariantTiles_06148	1346		973		981	813	802	895	849	829	834	764
singleVariantTiles_06149	1964		1576		1293	1221	647	725	694	732	425	540
singleVariantTiles_06150	1833		1344		1311	1144	572	703	520	612	425	483
singleVariantTiles_06151	53		29		33	30	7	7	12	6	11	17
singleVariantTiles_06152	53		40		29	23	12	11	19	19	11	13
singleVariantTiles_06153	0		5		1	1	0	0	0	1	0	0
singleVariantTiles_06165	559		376		296	279	74	77	52	77	83	118
singleVariantTiles_06166	424		286		270	245	60	87	60	59	85	98
singleVariantTiles_06173	842		678		605	485	256	337	278	307	135	214
singleVariantTiles_06174	695		627		510	458	237	251	267	234	130	148
singleVariantTiles_06175	141		116		93	104	56	76	60	51	59	67
singleVariantTiles_06176	175		96		106	66	64	60	50	71	46	31
singleVariantTiles_06177	9		9		9	4	0	3	3	0	2	1
singleVariantTiles_06178	23		7		18	17	0	6	2	6	0	7
singleVariantTiles_06185	82		75		59	68	60	39	46	60	49	52
singleVariantTiles_06186	81		44		48	48	34	29	43	43	67	57
singleVariantTiles_06187	485		378		326	306	96	119	96	101	55	80
singleVariantTiles_06188	491		378		316	276	120	163	96	118	59	69
singleVariantTiles_06211	875		584		541	462	374	393	321	288	302	368
singleVariantTiles_06212	647		496		447	415	300	319	305	344	305	410
singleVariantTiles_06219	20		17		28	20	0	2	4	5	3	5
singleVariantTiles_06220	18		24		25	26	2	5	8	22	7	12
singleVariantTiles_06221	156		120		121	113	23	28	25	26	34	34
singleVariantTiles_06222	134		94		116	114	24	46	28	24	29	59
singleVariantTiles_06225	97		95		80	100	78	152	142	73	159	323
singleVariantTiles_06226	113		81		74	95	97	129	114	95	157	215
singleVariantTiles_06257	144		124		122	153	138	282	207	191	271	281
singleVariantTiles_06258	130		90		130	109	199	191	191	234	284	292
singleVariantTiles_06263	1182		1015		854	798	681	873	864	843	827	890
singleVariantTiles_06264	1473		1111		1026	943	940	1030	1026	1035	1074	1084
singleVariantTiles_06265	822		593		567	522	286	313	332	350	259	273
singleVariantTiles_06266	1155		786		707	619	409	569	481	387	435	598
singleVariantTiles_06269	23		26		27	23	1	5	4	8	9	12
singleVariantTiles_06270	39		17		17	23	8	2	4	7	11	10
singleVariantTiles_06283	213		138		123	118	63	57	43	66	41	43
singleVariantTiles_06284	180		148		140	134	49	47	59	63	38	60
singleVariantTiles_06289	3163		2427		2288	1829	592	668	605	703	459	515
singleVariantTiles_06290	4177		3129		2821	2556	986	1004	957	1002	557	705
singleVariantTiles_06327	29		10		24	26	10	2	8	5	8	11
singleVariantTiles_06328	3		1		0	0	1	0	0	0	1	0
singleVariantTiles_06341	2136		1606		1368	1222	963	1144	977	1072	668	881
singleVariantTiles_06342	1817		1420		1303	1090	756	908	772	784	527	736
singleVariantTiles_06345	1030		834		664	602	359	392	373	339	179	240
singleVariantTiles_06346	1049		829		742	687	412	480	385	371	193	305
singleVariantTiles_06351	529		520		417	400	154	192	144	148	120	153
singleVariantTiles_06352	591		464		409	405	131	119	120	122	103	128
singleVariantTiles_06357	1646		1246		1118	957	708	774	665	738	418	583
singleVariantTiles_06358	1845		1398		1213	1120	782	897	771	794	491	703
singleVariantTiles_06387	738		546		538	475	297	273	275	271	251	300
singleVariantTiles_06388	1256		917		890	867	378	527	398	402	301	361
singleVariantTiles_06397	107		71		75	74	38	45	48	48	31	83
singleVariantTiles_06398	117		103		81	100	74	87	87	73	95	109
singleVariantTiles_06421	1551		1187		1106	1043	311	346	310	292	277	364
singleVariantTiles_06422	1774		1176		1221	1123	359	338	350	325	347	407
singleVariantTiles_06423	1236		929		800	759	394	443	365	410	249	354
singleVariantTiles_06424	1229		987		851	735	383	436	357	370	229	275
singleVariantTiles_06425	3083		2284		2068	1813	1060	1149	1180	1226	628	751
singleVariantTiles_06426	3633		2878		2719	2275	1271	1466	1285	1368	712	962
singleVariantTiles_06427	4759		3638		3243	3078	1493	1636	1557	1571	998	1314
singleVariantTiles_06428	3916		3104		2777	2561	1196	1519	1318	1358	798	1064
singleVariantTiles_06429	23		21		7	17	21	12	21	18	18	36
singleVariantTiles_06430	5		3		17	8	10	21	14	43	17	26
singleVariantTiles_06431	1108		984		952	824	402	561	425	438	343	408
singleVariantTiles_06432	1354		1105		1028	901	476	554	523	505	410	521
singleVariantTiles_06473	399		272		282	254	112	166	121	124	63	114
singleVariantTiles_06474	445		395		300	289	87	95	91	99	60	99
singleVariantTiles_06475	1458		1119		991	977	213	201	224	241	187	222
singleVariantTiles_06476	1140		941		847	880	162	199	162	196	160	228
singleVariantTiles_06481	389		323		279	272	127	184	162	164	144	149
singleVariantTiles_06482	523		436		405	361	204	211	215	234	228	199
singleVariantTiles_06483	346		274		224	202	175	223	192	214	206	207
singleVariantTiles_06484	312		307		230	194	166	207	234	217	223	227
singleVariantTiles_06501	196		167		132	163	64	67	43	39	21	36
singleVariantTiles_06502	227		166		146	114	59	71	61	59	23	41
singleVariantTiles_06507	357		353		261	273	116	125	160	112	124	159
singleVariantTiles_06508	458		437		320	356	141	161	170	179	156	178
singleVariantTiles_06509	230		170		155	108	76	71	63	78	54	58
singleVariantTiles_06510	189		150		129	99	85	68	64	62	43	56
singleVariantTiles_06511	397		245		250	207	299	289	213	282	271	320
singleVariantTiles_06512	399		261		254	198	296	336	324	330	327	350
singleVariantTiles_06513	276		210		196	206	192	243	230	222	312	367
singleVariantTiles_06514	213		186		173	177	187	245	198	198	269	352
singleVariantTiles_06515	417		329		256	225	128	161	154	158	187	238
singleVariantTiles_06516	467		323		274	265	221	225	167	169	266	351
singleVariantTiles_06517	801		615		544	505	860	786	781	799	540	698
singleVariantTiles_06518	722		603		563	521	758	913	870	923	748	809
singleVariantTiles_06521	721		570		533	427	365	449	449	417	434	494
singleVariantTiles_06522	541		425		421	373	288	394	324	306	359	360
singleVariantTiles_06523	287		206		179	170	74	96	47	63	63	54
singleVariantTiles_06524	398		238		220	202	99	104	90	122	59	70
singleVariantTiles_06535	1025		753		684	545	311	330	298	300	175	212
singleVariantTiles_06536	1020		842		693	675	290	318	307	324	156	237
singleVariantTiles_06537	40		42		40	52	28	39	17	52	24	54
singleVariantTiles_06538	33		32		28	23	20	13	6	27	20	28
singleVariantTiles_06539	404		272		286	291	125	124	91	122	122	134
singleVariantTiles_06540	573		389		350	297	103	103	92	81	92	107
singleVariantTiles_06541	581		424		378	348	217	255	224	226	79	121
singleVariantTiles_06542	494		398		333	288	225	217	229	251	81	126
singleVariantTiles_06545	1191		852		773	730	405	438	382	415	191	227
singleVariantTiles_06546	887		767		608	576	276	347	292	327	134	221
singleVariantTiles_06549	184		154		182	139	47	44	47	35	46	65
singleVariantTiles_06550	195		181		175	163	39	67	29	52	46	62
singleVariantTiles_06575	18		12		11	5	25	15	14	12	21	20
singleVariantTiles_06576	55		40		58	34	56	83	59	66	83	65
singleVariantTiles_06577	64		48		44	21	67	102	48	79	119	90
singleVariantTiles_06578	54		69		43	37	63	95	77	78	116	119
singleVariantTiles_06599	33		34		32	25	5	1	5	6	6	3
singleVariantTiles_06600	35		26		34	38	8	6	8	7	17	14
singleVariantTiles_06633	255		193		214	183	362	385	357	347	392	580
singleVariantTiles_06634	415		276		289	292	541	547	510	531	526	922
singleVariantTiles_06645	3475		2708		2558	2429	1162	1261	1219	1184	1490	1507
singleVariantTiles_06646	3080		2502		2341	2175	1066	1242	1053	915	1358	1426
singleVariantTiles_06653	502		304		397	305	119	115	110	107	73	122
singleVariantTiles_06654	422		280		288	299	77	106	78	127	70	86
singleVariantTiles_06655	246		159		154	163	104	95	92	97	74	73
singleVariantTiles_06656	169		111		102	122	53	98	64	79	76	70
singleVariantTiles_06663	127		118		104	78	82	80	91	105	81	87
singleVariantTiles_06664	142		118		125	115	111	114	93	115	94	104
singleVariantTiles_06679	256		258		195	194	32	29	36	33	17	25
singleVariantTiles_06680	349		278		216	215	42	65	50	32	24	45
singleVariantTiles_06681	359		277		223	200	69	81	64	58	38	52
singleVariantTiles_06682	210		169		145	129	44	42	45	33	24	28
singleVariantTiles_06691	23		31		18	10	11	18	21	17	13	17
singleVariantTiles_06692	59		56		42	54	55	33	45	37	34	49
singleVariantTiles_06693	232		200		176	139	133	147	126	142	133	91
singleVariantTiles_06694	280		197		178	163	181	173	172	132	114	100
singleVariantTiles_06695	265		190		174	136	91	71	95	100	84	62
singleVariantTiles_06696	233		165		162	146	87	89	81	83	70	57
singleVariantTiles_06697	944		739		616	557	293	290	253	353	171	207
singleVariantTiles_06698	1090		783		744	637	347	310	278	302	155	225
singleVariantTiles_06709	46		24		19	16	25	10	12	21	25	11
singleVariantTiles_06710	46		34		31	20	10	12	9	8	20	15
singleVariantTiles_06717	1424		1055		1027	1014	300	342	303	354	226	341
singleVariantTiles_06718	1598		1186		1181	988	377	417	412	425	283	353
singleVariantTiles_06729	1249		1084		1008	827	208	207	214	297	156	188
singleVariantTiles_06730	1403		1125		991	860	301	293	239	290	215	221
singleVariantTiles_06733	89		79		92	54	23	40	27	37	15	29
singleVariantTiles_06734	90		67		75	57	21	43	29	45	22	42
singleVariantTiles_06735	313		192		225	160	104	111	107	121	52	57
singleVariantTiles_06736	285		236		165	168	109	111	124	125	49	60
singleVariantTiles_06737	315		260		248	211	103	113	103	125	89	91
singleVariantTiles_06738	195		167		156	131	50	61	62	37	39	45
singleVariantTiles_06747	1222		1012		903	670	336	418	323	363	161	252
singleVariantTiles_06748	1438		1021		886	745	359	380	404	370	188	242
singleVariantTiles_06749	729		588		494	402	213	221	181	216	117	140
singleVariantTiles_06750	770		647		585	509	256	237	245	274	118	137
singleVariantTiles_06757	2444		1900		1749	1542	653	795	653	627	737	1017
singleVariantTiles_06758	1481		1214		1110	985	575	675	617	570	722	798
singleVariantTiles_06791	306		212		210	205	46	43	37	41	46	47
singleVariantTiles_06792	274		159		180	178	23	33	37	37	34	45
singleVariantTiles_06793	146		101		80	105	35	28	32	44	14	18
singleVariantTiles_06794	205		128		122	138	57	63	56	49	31	38
singleVariantTiles_06807	1763		1268		1279	1152	458	503	398	479	300	365
singleVariantTiles_06808	1926		1412		1246	989	500	555	520	509	286	327
singleVariantTiles_06827	164		145		109	123	58	102	59	54	47	51
singleVariantTiles_06828	180		138		125	129	64	64	43	74	45	62
singleVariantTiles_06865	132		94		81	97	28	28	26	36	20	30
singleVariantTiles_06866	157		136		118	100	39	39	30	41	37	54
singleVariantTiles_06867	243		171		151	131	65	78	75	62	45	55
singleVariantTiles_06868	171		116		129	107	56	53	35	44	31	33
singleVariantTiles_06873	225		122		115	128	108	117	86	113	87	108
singleVariantTiles_06874	160		112		91	95	87	102	83	98	79	99
singleVariantTiles_06877	198		150		145	164	77	115	94	73	53	73
singleVariantTiles_06878	194		199		147	185	83	95	87	86	50	61
singleVariantTiles_06895	1114		884		733	673	249	334	318	315	258	290
singleVariantTiles_06896	1330		934		859	794	354	406	330	361	294	296
singleVariantTiles_06901	83		49		38	32	13	13	4	18	1	8
singleVariantTiles_06902	47		29		34	28	8	12	5	3	1	6
singleVariantTiles_06903	7		20		12	11	1	2	3	2	0	1
singleVariantTiles_06904	8		5		3	5	0	3	1	3	0	1
singleVariantTiles_06919	1097		811		740	595	350	399	343	343	148	209
singleVariantTiles_06920	1201		935		840	633	350	395	362	358	148	228
singleVariantTiles_06925	874		719		682	583	360	424	387	416	476	448
singleVariantTiles_06926	1060		776		740	676	383	385	352	424	437	463
singleVariantTiles_06931	60		37		46	42	25	32	19	10	9	15
singleVariantTiles_06932	86		64		59	54	29	36	27	25	18	13
singleVariantTiles_06933	1008		787		657	566	207	238	223	180	92	179
singleVariantTiles_06934	998		813		685	645	199	220	176	176	135	174
singleVariantTiles_06935	886		627		563	539	327	358	335	277	287	443
singleVariantTiles_06936	915		751		570	588	342	389	316	350	263	419
singleVariantTiles_06937	2527		1955		1804	1538	714	854	696	694	403	543
singleVariantTiles_06938	3095		2281		2040	1810	852	931	972	893	506	692
singleVariantTiles_06939	64		53		49	47	27	32	47	44	24	19
singleVariantTiles_06940	90		91		61	60	34	41	59	51	48	42
singleVariantTiles_06941	169		160		152	122	69	107	90	97	55	63
singleVariantTiles_06942	145		118		80	83	46	56	52	52	38	34
singleVariantTiles_06943	3104		2347		2156	1906	861	1021	920	789	1204	1577
singleVariantTiles_06944	3282		2436		2214	1974	890	1180	971	927	1380	1660
singleVariantTiles_06948	1		1		0	0	0	0	0	0	0	0
singleVariantTiles_06953	2416		1646		1501	1410	469	501	447	462	335	396
singleVariantTiles_06954	2444		1771		1669	1635	351	373	365	336	363	425
singleVariantTiles_06965	588		445		440	386	353	371	412	353	395	382
singleVariantTiles_06966	577		386		371	353	354	402	303	330	324	319
singleVariantTiles_06971	110		63		58	68	25	24	18	16	39	47
singleVariantTiles_06972	99		105		93	59	28	47	62	44	43	43
singleVariantTiles_06985	112		59		72	53	164	219	205	192	175	193
singleVariantTiles_06986	152		83		102	58	170	130	156	203	156	202
singleVariantTiles_06987	1213		950		735	717	431	535	482	470	296	385
singleVariantTiles_06988	1361		1015		950	834	565	623	570	603	439	623
singleVariantTiles_06989	188		154		155	99	66	73	54	59	28	40
singleVariantTiles_06990	243		212		182	144	88	106	91	100	38	69
singleVariantTiles_06991	519		360		337	289	149	177	134	174	66	97
singleVariantTiles_06992	558		431		412	318	156	215	175	182	85	118
singleVariantTiles_06997	219		231		188	175	92	115	117	109	77	116
singleVariantTiles_06998	116		116		65	86	42	63	59	48	49	69
singleVariantTiles_07021	139		116		100	106	15	24	22	19	19	19
singleVariantTiles_07022	195		133		135	150	16	24	20	29	25	20
singleVariantTiles_07029	1596		1291		1214	1137	384	441	392	443	349	351
singleVariantTiles_07030	1298		1097		1060	977	280	370	313	308	306	358
singleVariantTiles_07047	212		184		113	115	279	316	399	291	248	250
singleVariantTiles_07048	226		189		142	151	403	331	388	385	358	286
singleVariantTiles_07077	373		316		286	199	209	185	176	165	134	142
singleVariantTiles_07078	390		275		277	230	196	227	137	176	115	138
singleVariantTiles_07079	686		587		499	449	287	301	262	277	190	199
singleVariantTiles_07080	766		540		462	461	291	294	235	261	184	186
singleVariantTiles_07095	34		52		25	24	21	36	24	37	27	17
singleVariantTiles_07096	12		9		9	15	10	19	4	8	7	16
singleVariantTiles_07097	1572		1287		1205	1090	478	529	531	520	534	604
singleVariantTiles_07098	2003		1482		1414	1193	589	685	651	593	519	638
singleVariantTiles_07099	2308		1725		1600	1403	828	933	822	812	808	1019
singleVariantTiles_07100	1571		1325		1147	1000	708	776	731	782	883	1058
singleVariantTiles_07101	742		496		521	472	365	454	359	332	458	458
singleVariantTiles_07102	603		485		435	472	360	376	386	392	385	466
singleVariantTiles_07103	1540		1295		1216	1110	497	583	521	635	397	505
singleVariantTiles_07104	1645		1243		1333	1099	474	574	474	484	343	455
singleVariantTiles_07105	874		652		614	549	272	277	337	300	187	238
singleVariantTiles_07106	935		684		682	548	344	364	289	295	199	243
singleVariantTiles_07107	152		122		103	99	47	60	50	32	33	47
singleVariantTiles_07108	615		421		400	346	172	205	166	183	141	140
singleVariantTiles_07109	1375		1112		1027	804	409	482	384	383	307	361
singleVariantTiles_07110	1220		890		857	761	329	411	318	363	208	333
singleVariantTiles_07111	1636		1276		1099	1013	523	626	516	623	368	495
singleVariantTiles_07112	1540		1181		1157	1004	479	494	445	456	360	449
singleVariantTiles_07113	665		555		469	436	169	182	149	158	101	133
singleVariantTiles_07114	652		479		417	388	147	145	124	129	110	129
singleVariantTiles_07115	289		219		198	146	82	80	65	75	34	42
singleVariantTiles_07116	237		186		177	134	63	79	58	68	44	40
singleVariantTiles_07117	959		802		678	553	235	294	228	251	130	178
singleVariantTiles_07118	1020		753		663	523	218	272	244	233	124	178
singleVariantTiles_07119	126		106		76	75	22	33	22	20	17	22
singleVariantTiles_07120	112		73		66	53	15	23	21	19	19	25
singleVariantTiles_07121	32		33		31	28	22	17	14	9	13	14
singleVariantTiles_07122	120		90		84	50	36	31	44	24	21	48
singleVariantTiles_07147	42		32		29	28	19	33	34	30	32	19
singleVariantTiles_07148	25		8		20	12	8	8	14	15	10	12
singleVariantTiles_07149	560		404		418	385	1316	1410	1286	1182	1765	1986
singleVariantTiles_07150	638		509		480	474	1505	1303	1389	1507	1789	1918
singleVariantTiles_07151	418		298		307	239	931	990	958	824	1077	1320
singleVariantTiles_07152	452		376		338	310	1063	1307	1254	1214	1354	1639
singleVariantTiles_07173	187		130		138	111	56	59	38	54	17	27
singleVariantTiles_07174	126		84		90	105	25	23	33	34	12	17
singleVariantTiles_07181	9		7		16	9	2	8	7	3	5	8
singleVariantTiles_07182	30		18		12	7	16	11	8	13	10	6
singleVariantTiles_07197	592		463		443	393	129	158	136	160	94	125
singleVariantTiles_07198	432		420		348	325	103	117	105	99	89	97
singleVariantTiles_07209	409		240		250	200	96	91	118	105	42	65
singleVariantTiles_07210	256		176		174	149	79	86	57	75	33	48
singleVariantTiles_07241	555		405		352	416	78	86	86	89	90	118
singleVariantTiles_07242	454		354		279	275	79	58	75	68	65	116
singleVariantTiles_07247	935		657		695	559	1040	1156	984	1077	1109	1007
singleVariantTiles_07248	887		608		712	715	910	1111	923	1021	1107	1134
singleVariantTiles_07275	1393		1157		1093	962	170	193	223	209	158	180
singleVariantTiles_07276	1331		1024		961	767	151	169	153	165	123	162
singleVariantTiles_07277	1356		980		922	882	893	1059	877	1042	900	1073
singleVariantTiles_07278	506		388		368	370	360	327	330	375	322	424
singleVariantTiles_07279	358		271		284	290	219	249	184	205	279	444
singleVariantTiles_07280	378		317		262	290	211	266	266	227	216	417
singleVariantTiles_07281	266		191		193	203	268	384	332	316	407	640
singleVariantTiles_07282	327		197		193	212	313	374	270	312	460	677
singleVariantTiles_07283	589		408		407	383	617	681	649	653	652	861
singleVariantTiles_07284	752		581		550	448	705	709	647	735	733	964
singleVariantTiles_07299	234		159		135	108	47	53	32	63	28	37
singleVariantTiles_07300	156		109		99	125	55	67	62	49	51	50
singleVariantTiles_07301	2940		2418		2251	1924	604	581	660	744	582	690
singleVariantTiles_07302	3606		2794		2332	2184	718	781	710	798	670	844
singleVariantTiles_07303	180		158		122	149	52	69	56	53	78	95
singleVariantTiles_07304	203		154		156	126	56	50	48	52	60	72
singleVariantTiles_07305	621		500		455	390	169	236	210	182	193	247
singleVariantTiles_07306	554		428		377	367	156	182	159	173	154	181
singleVariantTiles_07307	84		71		65	47	52	45	64	47	72	58
singleVariantTiles_07308	94		46		57	69	56	89	48	69	70	102
singleVariantTiles_07309	319		263		210	211	109	149	123	112	109	114
singleVariantTiles_07310	487		262		273	332	137	133	121	129	107	126
singleVariantTiles_07311	239		175		164	200	97	129	75	82	80	95
singleVariantTiles_07312	199		160		175	160	112	77	92	103	85	87
singleVariantTiles_07313	222		225		162	183	196	201	218	245	191	213
singleVariantTiles_07314	333		187		203	212	203	218	169	219	219	203
singleVariantTiles_07315	269		188		159	145	162	229	164	152	135	192
singleVariantTiles_07316	291		185		207	177	165	216	177	190	152	172
singleVariantTiles_07317	3406		2617		2372	2153	3885	4381	3921	4240	3372	3793
singleVariantTiles_07318	3523		2675		2396	2204	4661	5022	4617	5244	4060	4751
singleVariantTiles_07319	286		201		222	185	318	383	312	436	283	329
singleVariantTiles_07320	302		187		197	180	258	302	305	262	226	285
singleVariantTiles_07321	54		52		33	25	181	184	206	161	186	133
singleVariantTiles_07322	71		46		52	49	192	279	184	250	212	233
singleVariantTiles_07323	554		446		441	350	1050	1123	1086	1086	1150	1160
singleVariantTiles_07324	558		463		408	365	593	686	702	646	579	779
singleVariantTiles_07325	1318		960		996	968	2747	2804	2590	2768	2878	3120
singleVariantTiles_07326	1682		1255		1247	1126	3103	4090	3380	3656	3800	4214
singleVariantTiles_07327	2929		2209		1998	1833	1249	1378	1248	1356	701	1075
singleVariantTiles_07328	3979		3290		2736	2709	1686	1864	1812	1899	1035	1401
singleVariantTiles_07329	320		254		256	203	96	148	114	116	92	102
singleVariantTiles_07330	336		299		261	242	121	149	139	156	116	121
singleVariantTiles_07331	7		10		17	20	1	7	14	10	1	12
singleVariantTiles_07332	24		33		15	11	10	8	11	10	9	14
singleVariantTiles_07333	395		304		274	281	310	336	302	342	325	333
singleVariantTiles_07334	305		260		186	204	207	254	240	241	201	233
singleVariantTiles_07335	347		245		236	281	221	245	258	298	228	286
singleVariantTiles_07336	315		253		235	226	241	218	311	253	228	212
singleVariantTiles_07337	535		365		331	329	269	357	305	318	296	318
singleVariantTiles_07338	531		414		331	349	313	393	321	339	285	336
singleVariantTiles_07339	307		239		238	166	127	173	146	132	98	130
singleVariantTiles_07340	219		211		161	141	94	103	91	90	73	74
singleVariantTiles_07341	244		198		197	161	59	96	78	93	45	76
singleVariantTiles_07342	400		267		268	215	120	124	94	101	65	80
singleVariantTiles_07351	72		67		55	53	31	38	17	33	22	23
singleVariantTiles_07352	80		73		44	47	24	13	25	37	20	14
singleVariantTiles_07365	519		424		423	321	165	168	162	178	193	215
singleVariantTiles_07366	464		467		374	294	120	130	128	127	109	111
singleVariantTiles_07369	2520		1966		1740	1580	2652	2845	2527	2716	2249	2456
singleVariantTiles_07370	2829		2203		1935	1865	2138	2330	2530	2374	2012	2171
singleVariantTiles_07371	1286		1020		935	869	927	1088	802	969	677	795
singleVariantTiles_07372	1763		1275		1243	1141	1172	1302	1134	1186	850	969
singleVariantTiles_07373	460		365		248	275	380	416	392	402	328	334
singleVariantTiles_07374	329		268		225	191	391	365	385	418	302	366
singleVariantTiles_07375	518		377		378	267	705	770	759	763	674	691
singleVariantTiles_07376	637		459		456	442	666	886	726	797	630	751
singleVariantTiles_07377	72		42		39	55	206	361	221	196	268	271
singleVariantTiles_07378	32		39		38	20	113	160	110	137	144	191
singleVariantTiles_07379	3		4		1	1	9	14	14	1	15	9
singleVariantTiles_07380	7		3		3	1	4	9	2	27	7	11
singleVariantTiles_07381	111		118		116	90	244	323	284	268	363	326
singleVariantTiles_07382	204		139		134	149	480	507	501	472	544	597
singleVariantTiles_07383	235		188		160	158	61	59	48	53	21	29
singleVariantTiles_07384	282		205		178	187	49	71	47	49	35	42
singleVariantTiles_07387	22		18		32	11	15	23	14	18	16	8
singleVariantTiles_07388	8		17		9	25	13	33	9	20	12	18
singleVariantTiles_07389	487		360		336	320	194	229	224	214	270	201
singleVariantTiles_07390	396		317		303	275	185	230	197	176	185	195
singleVariantTiles_07391	420		322		307	269	225	300	238	233	234	308
singleVariantTiles_07392	456		319		339	337	291	312	285	287	306	373
singleVariantTiles_07393	47		35		44	46	28	36	41	27	45	38
singleVariantTiles_07394	111		76		73	55	53	74	42	51	74	81
singleVariantTiles_07395	1801		1420		1222	1103	555	609	559	522	402	495
singleVariantTiles_07396	1629		1309		1194	1126	496	609	560	573	331	443
[truncated: 7,593 more rows]
