# Supplementary material for: Massively parallel identification of causal variants underlying gene expression differences in a yeast cross
Source: bioRxiv preprint, doi:10.1101/2020.08.31.276337, version 1 (2020-08-31)
Supplement: Table S5 [file 276337_file07.xlsx]

## Sheet: bestPs_200810
Variant	minPVal	minAdjPVal	FCMinPVal	FCMinAdjPVal	LibraryOfMostSignificantTest	SystematicGeneName
BDH1:chrI_35059_G_A	0.299362	0.634352	-0.0996994	-0.0996994	Upstream	YAL060W
BDH1:chrI_35070_C_T	0.316225	0.654119	0.0980848	0.0980848	Upstream	YAL060W
ECM1:chrI_36436_CT_C	0.436393	0.713991	-0.166064	-0.166064	TSS	YAL059W
CNE1:chrI_37294_T_C	0.658402	0.859337	0.0276991	0.0276991	TSS	YAL058W
CNE1:chrI_37315_T_A	0.0732649	0.301913	0.378156	0.378156	Upstream	YAL058W
CNE1:chrI_37330_A_G	0.00934853	0.0949513	0.218337	0.218337	Upstream	YAL058W
CNE1:chrI_37409_A_C	0.339836	0.638515	0.0834155	0.0834155	TSS	YAL058W
GPB2:chrI_39105_A_G	0.206181	0.495454	0.118943	0.118943	TSS	YAL056W
GPB2:chrI_39123_C_T	0.0789607	0.301821	0.168462	0.168462	TSS	YAL056W
GPB2:chrI_39144_G_A	0.0240104	0.15739	0.218071	0.218071	TSS	YAL056W
GPB2:chrI_39162_C_G	9.42214e-05	0.00280355	-0.446684	-0.446684	TSS	YAL056W
ACS1:chrI_45198_G_A	0.0258984	0.164439	0.330614	0.330614	TSS	YAL054C
FLC2:chrI_45634_C_CT	0.0199727	0.141961	-0.345473	-0.345473	TSS	YAL053W
AIM2:chrI_52733_A_G	4.55522e-06	0.000484697	0.647108	0.647108	Upstream	YAL049C
YAL047W-A:chrI_54175_A_G	0.740562	0.895433	0.0491709	0.0491709	TSS	YAL047W-A
YAL047W-A:chrI_54198_G_A	0.0979406	0.341274	0.236864	0.236864	TSS	YAL047W-A
YAL047W-A:chrI_54244_A_G	0.796813	0.91809	-0.0461036	-0.0461036	TSS	YAL047W-A
SPC72:chrI_56888_G_GT	0.825238	0.93407	0.0569803	0.0569803	TSS	YAL047C
GCV3:chrI_58490_A_T	0.0439376	0.22173	1.12259	1.12259	TSS	YAL044C
FUN12:chrI_76368_G_C	0.982901	0.9947	0.00390666	0.00390666	TSS	YAL035W
FUN12:chrI_76386_G_A	0.194853	0.480551	0.209887	0.209887	TSS	YAL035W
MYO4:chrI_92602_CT_C	0.758753	0.904916	-0.0244143	-0.021198	Upstream	YAL029C
SAW1:chrI_94472_G_A	0.641687	0.850946	-0.132156	-0.132156	TSS	YAL027W
PMT2:chrI_108747_GT_G	0.12286	0.379087	-0.224383	-0.224383	TSS	YAL023C
ATS1:chrI_114652_C_T	0.478025	0.745005	-0.078843	-0.078843	TSS	YAL020C
CYS3:chrI_130613_C_CT	0.0230211	0.154237	0.130313	0.130313	TSS	YAL012W
FUN14:chrI_136814_T_C	0.102734	0.36554	0.131812	0.131812	Upstream	YAL008W
TRN1:chrI_138499_G_A	0.050776	0.256405	0.436065	0.436065	Upstream	tP(UGG)A
ERP2:chrI_138655_G_A	0.000100069	0.00366948	-0.386193	-0.386193	Upstream	YAL007C
ERP2:chrI_138748_AT_A	0.0555923	0.265552	0.489866	0.489866	Upstream	YAL007C
TRN1:chrI_138770_A_G	0.063623	0.282069	0.204029	0.204029	Upstream	tP(UGG)A
TRN1:chrI_138793_T_C	0.406567	0.734582	-0.109095	-0.109095	Upstream	tP(UGG)A
SWD1:chrI_154746_C_T	0.819368	0.939972	-0.0175915	-0.0175915	Upstream	YAR003W
SWD1:chrI_154847_GTT_GTTT	0.460218	0.730907	0.182575	0.182575	TSS	YAR003W
RFA1:chrI_158733_A_T	0.479757	0.745005	0.0300202	0.0300202	TSS	YAR007C
RFA1:chrI_158824_G_C	0.0874604	0.332647	0.132578	0.132578	Upstream	YAR007C
RFA1:chrI_158827_G_A	0.00534361	0.0692191	0.235951	0.235951	Upstream	YAR007C
KIN3:chrI_171848_G_GA	0.873818	0.950827	0.00583844	0.00583844	TSS	YAR018C
YAR023C:chrI_180726_G_C	0.450847	0.722815	0.0747201	0.0747201	TSS	YAR023C
YAR023C:chrI_180747_A_G	0.0149005	0.126328	0.257896	0.257896	Upstream	YAR023C
YAR023C:chrI_180787_C_T	0.43547	0.71325	-0.0718628	-0.0718628	TSS	YAR023C
YAR023C:chrI_180794_T_A	0.388907	0.720568	0.1132	0.1132	Upstream	YAR023C
YAR023C:chrI_180818_C_A	0.878917	0.951639	-0.0124848	-0.0124848	TSS	YAR023C
YAR023C:chrI_180822_T_A	0.370926	0.663986	-0.0854149	-0.0854149	TSS	YAR023C
YAR023C:chrI_180829_T_TC	0.874114	0.950827	0.012951	0.012951	TSS	YAR023C
YAR023C:chrI_180831_A_T	0.276019	0.574312	0.115619	0.115619	TSS	YAR023C
YAR023C:chrI_180835_T_C	0.0226822	0.152979	0.199714	0.199714	TSS	YAR023C
UIP3:chrI_183545_C_T	0.205116	0.530169	0.131164	0.131164	Upstream	YAR027W
UIP3:chrI_183566_AC_A	0.433374	0.752387	0.0838274	0.0838274	Upstream	YAR027W
UIP3:chrI_183569_A_T	0.316138	0.654119	0.108184	0.108184	Upstream	YAR027W
tS(AGA)A:chrI_183571_A_AGG	0.0156028	0.129953	0.429585	0.429585	Upstream	tS(AGA)A
UIP3:chrI_183590_A_G	0.000701858	0.0157618	0.615781	0.615781	Upstream	YAR027W
UIP3:chrI_183591_C_G	0.0181027	0.14263	-0.402886	-0.402886	Upstream	YAR027W
UIP3:chrI_183596_C_T	0.00979852	0.0973102	-0.329608	-0.329608	Upstream	YAR027W
UIP3:chrI_183624_A_AG	0.236656	0.570478	0.114902	0.114902	Upstream	YAR027W
UIP3:chrI_183626_A_AG	0.69583	0.899733	-0.0377199	-0.0377199	Upstream	YAR027W
UIP3:chrI_183650_G_A	0.394947	0.726345	0.0722522	0.0722522	Upstream	YAR027W
YAR028W:chrI_184718_CG_C	0.0734155	0.301913	-0.151593	-0.151593	Upstream	YAR028W
YAR028W:chrI_184781_C_CT	1.1235e-05	0.000851002	-0.573224	-0.573224	Upstream	YAR028W
SWH1:chrI_192469_G_A	0.729882	0.88992	0.0287994	0.0287994	TSS	YAR042W
SWH1:chrI_192531_C_T	0.715389	0.884612	-0.0337374	-0.0337374	TSS	YAR042W
SWH1:chrI_192550_C_CAAAAAA	0.23691	0.529927	0.126602	0.126602	TSS	YAR042W
SWH1:chrI_192551_CAAA_AAAA	0.897022	0.963022	-0.0124244	-0.0124244	TSS	YAR042W
YBL086C:chrII_62747_AG_A	0.00707495	0.0722956	0.569498	0.569498	TSS	YBL086C
ALG3:chrII_71431_G_A	0.280627	0.616119	0.125829	0.125829	Upstream	YBL082C
NUP170:chrII_74739_T_G	0.803458	0.93578	-0.0275139	-0.0275139	Upstream	YBL079W
ILS1:chrII_84412_AT_TT	0.228032	0.520456	-0.27149	-0.27149	TSS	YBL076C
AAR2:chrII_87849_G_A	0.00194815	0.0303213	0.184994	0.184994	TSS	YBL074C
YBL055C:chrII_116939_G_A	0.674728	0.867344	0.0672506	0.0672506	TSS	YBL055C
YBL055C:chrII_116947_T_G	0.0596951	0.273899	-0.188701	-0.188701	Upstream	YBL055C
PIN4:chrII_124932_T_C	0.614102	0.838453	-0.0146199	-0.0146199	TSS	YBL051C
PIN4:chrII_124959_A_C	0.036839	0.21381	-0.145921	-0.145921	Upstream	YBL051C
EDE1:chrII_132280_T_C	0.781691	0.913834	0.0322553	0.0322553	TSS	YBL047C
COR1:chrII_135827_G_A	0.550193	0.79282	-0.051159	-0.051159	TSS	YBL045C
FUI1:chrII_140383_A_G	0.00985049	0.089981	-0.211047	-0.211047	TSS	YBL042C
PRE7:chrII_141175_C_T	0.000208386	0.00501946	0.16189	0.16189	TSS	YBL041W
PRE7:chrII_141191_G_A	0.738119	0.894288	0.0135897	0.0135897	TSS	YBL041W
PRE7:chrII_141207_A_G	0.0299429	0.174427	-0.0860052	-0.0860052	TSS	YBL041W
MRPL16:chrII_146099_C_T	0.339928	0.67728	-0.118894	-0.118894	Upstream	YBL038W
MRPL16:chrII_146107_C_A	0.739082	0.91444	0.0419618	0.0419618	Upstream	YBL038W
MRPL16:chrII_146113_A_T	0.875962	0.956749	0.030759	0.030759	Upstream	YBL038W
MRPL16:chrII_146114_C_T	0.474951	0.7826	-0.0818971	-0.0818971	Upstream	YBL038W
APL3:chrII_146992_C_T	0.216957	0.508658	-0.0809776	-0.0809776	TSS	YBL037W
POL12:chrII_153787_T_A	0.0463001	0.227541	0.421589	0.421589	TSS	YBL035C
POL12:chrII_153815_TA_T	0.0392285	0.210466	0.423706	0.423706	TSS	YBL035C
RIB1:chrII_159797_C_T	0.260146	0.594372	0.128538	0.128538	Upstream	YBL033C
RIB1:chrII_159857_C_G	0.63898	0.870178	-0.029063	-0.029063	Upstream	YBL033C
YBL029C-A:chrII_164914_A_G	0.36117	0.657164	0.173832	0.173832	TSS	YBL029C-A
LSM2:chrII_170442_T_C	0.0096384	0.0893194	-0.265461	-0.265461	TSS	YBL026W
NCL1:chrII_172488_A_G	0.847105	0.941458	-0.029032	-0.029032	TSS	YBL024W
MCM2:chrII_177622_G_A	0.192406	0.477856	0.317531	0.317531	TSS	YBL023C
HAP3:chrII_182128_T_C	0.0217729	0.156436	-0.221228	-0.221228	Upstream	YBL021C
HAP3:chrII_182137_G_T	0.472252	0.741006	0.0600294	0.0600294	TSS	YBL021C
POP8:chrII_186525_A_G	0.891019	0.959045	0.0279834	0.0279834	TSS	YBL018C
POP8:chrII_186623_C_T	0.116413	0.371558	-0.449533	-0.449533	TSS	YBL018C
POP8:chrII_186648_C_G	0.486926	0.749402	-0.123246	-0.123246	TSS	YBL018C
RRN6:chrII_201782_C_T	0.944631	0.981498	-0.0061511	-0.0061511	TSS	YBL014C
RRN6:chrII_201831_G_A	0.0802772	0.303456	-0.163626	-0.163626	TSS	YBL014C
RRN6:chrII_201879_C_T	0.0786779	0.301119	-0.204983	-0.204983	TSS	YBL014C
YBL010C:chrII_207021_GTT_GT	0.143694	0.412985	-0.3267	-0.3267	TSS	YBL010C
SLA1:chrII_216520_A_G	0.00883214	0.0840299	-0.104688	-0.104688	TSS	YBL007C
SLA1:chrII_216541_A_C	0.269231	0.56942	0.0390925	0.0390925	TSS	YBL007C
LDB7:chrII_217360_T_A	0.00193527	0.0341846	-0.217334	-0.217334	Upstream	YBL006C
HTA2:chrII_235838_TA_T	0.227845	0.520456	0.155871	0.155871	TSS	YBL003C
HTA2:chrII_235845_A_G	0.511767	0.765086	-0.0619606	-0.0619606	TSS	YBL003C
HTA2:chrII_236383_G_A	0.397036	0.729281	-0.179902	-0.179902	Upstream	YBL003C
HTA2:chrII_236390_G_A	0.0148445	0.126328	-0.403582	-0.403582	Upstream	YBL003C
HTA2:chrII_236391_G_A	0.480415	0.786149	0.14037	0.14037	Upstream	YBL003C
HTA2:chrII_236427_TTTC_T	0.0788199	0.311082	-0.147769	-0.147769	Upstream	YBL003C
HTA2:chrII_236441_T_A	0.0143022	0.124101	-0.24574	-0.24574	Upstream	YBL003C
ECM15:chrII_237541_C_T	0.0252622	0.161848	0.130835	0.130835	TSS	YBL001C
NTH2:chrII_241422_T_C	0.239523	0.573648	0.593869	0.593869	Upstream	YBR001C
RER2:chrII_242639_AT_A	0.717205	0.885564	-0.0221059	-0.0221059	TSS	YBR002C
GPI18:chrII_245747_T_C	0.222313	0.513095	0.213357	0.213357	TSS	YBR004C
GPI18:chrII_245763_G_GAAA	0.277773	0.611356	-0.246056	-0.246056	Upstream	YBR004C
UGA2:chrII_246816_G_A	0.642388	0.850976	0.0247777	0.0247777	TSS	YBR006W
DSF2:chrII_251134_G_T	0.0359059	0.211541	-0.173176	-0.173176	Upstream	YBR007C
FLR1:chrII_254436_T_C	0.0235772	0.155558	-0.125743	-0.125743	TSS	YBR008C
HHT1:chrII_255828_T_C	0.0969229	0.351296	-0.142914	-0.142914	Upstream	YBR010W
HHT1:chrII_256267_C_A	0.780695	0.913834	0.0766468	0.0766468	TSS	YBR010W
GRX7:chrII_267481_A_AT	0.503112	0.759558	0.0942162	0.0942162	TSS	YBR014C
GRX7:chrII_267510_C_T	0.139115	0.405584	0.186289	0.186289	TSS	YBR014C
GRX7:chrII_267525_T_A	0.0404088	0.225171	-0.256164	-0.256164	Upstream	YBR014C
MNN2:chrII_269653_C_T	0.00542759	0.0697008	-0.435564	-0.435564	Upstream	YBR015C
GAL10:chrII_278379_CT_C	6.19123e-16	3.13173e-13	-1.05731	-1.05731	TSS	YBR019C
POA1:chrII_283573_C_T	0.984441	0.994915	0.00095626	0.00095626	TSS	YBR022W
RKM3:chrII_298141_C_T	0.322951	0.618748	0.0465137	0.0465137	TSS	YBR030W
ATP3:chrII_315453_C_T	0.236876	0.529927	0.0433237	0.0433237	TSS	YBR039W
QDR3:chrII_324106_A_C	0.00355094	0.0454731	0.148203	0.148203	TSS	YBR043C
QDR3:chrII_324220_G_A	0.0621132	0.266294	-0.10799	-0.10799	TSS	YBR043C
TCM62:chrII_326112_A_T	0.680398	0.870482	0.0453331	0.0453331	TSS	YBR044C
TCM62:chrII_326179_A_G	0.184162	0.466944	-0.0967577	-0.0967577	TSS	YBR044C
GIP1:chrII_330203_T_A	0.0128674	0.115703	-0.276728	-0.276728	Upstream	YBR045C
ZTA1:chrII_331557_G_A	0.102198	0.349293	-0.310005	-0.310005	TSS	YBR046C
FMP23:chrII_331783_G_A	0.485553	0.790033	0.11112	0.11112	Upstream	YBR047W
FMP23:chrII_331804_A_G	0.398013	0.688767	-0.0807212	-0.0807212	TSS	YBR047W
RPS11B:chrII_332691_G_GCTTTACGTTTCC	0.364624	0.696965	-0.0985151	-0.0985151	Upstream	YBR048W
RPS11B:chrII_332772_A_G	0.204838	0.493205	0.265183	0.265183	TSS	YBR048W
REB1:chrII_337074_G_A	0.155213	0.455188	0.150304	0.150304	Upstream	YBR049C
REB1:chrII_337088_A_C	0.67298	0.867114	-0.0500936	-0.0500936	TSS	YBR049C
RFS1:chrII_339511_G_A	0.16542	0.446928	0.180019	0.180019	TSS	YBR052C
RFS1:chrII_339542_G_A	0.422923	0.704581	0.103396	0.103396	TSS	YBR052C
YRO2:chrII_342642_G_A	0.00108331	0.0190799	-0.237713	-0.237713	TSS	YBR054W
YRO2:chrII_342723_C_T	0.91336	0.967555	0.00791279	0.00791279	TSS	YBR054W
PRP6:chrII_347317_C_T	0.5801	0.813336	-0.113544	-0.113544	TSS	YBR055C
YBR056W:chrII_347777_A_G	0.131715	0.395014	0.116034	0.116034	TSS	YBR056W
YBR056W:chrII_347803_T_A	0.31928	0.614242	0.0822637	0.0822637	TSS	YBR056W
YBR056W:chrII_347856_T_G	0.256565	0.556993	0.0811643	0.0811643	TSS	YBR056W
AKL1:chrII_360477_A_C	0.0564039	0.251626	0.168666	0.168666	TSS	YBR059C
ORC2:chrII_362638_C_T	0.0177691	0.130896	0.135599	0.135599	TSS	YBR060C
ORC2:chrII_362688_T_G	0.0338528	0.188174	0.114011	0.114011	TSS	YBR060C
ORC2:chrII_362702_C_T	0.057333	0.253653	-0.112857	-0.112857	TSS	YBR060C
ORC2:chrII_362748_T_C	0.0410256	0.215793	-0.118936	-0.118936	TSS	YBR060C
TRM7:chrII_365830_G_A	0.00802822	0.0793893	0.168248	0.168248	TSS	YBR061C
TRM7:chrII_365863_C_T	0.469389	0.739534	0.0436787	0.0436787	TSS	YBR061C
ECM2:chrII_369788_CT_CTT	0.322813	0.662071	0.112997	0.112997	Upstream	YBR065C
ECM2:chrII_369831_G_C	0.102451	0.364823	-0.145089	-0.145089	Upstream	YBR065C
ECM2:chrII_369847_A_C	0.107955	0.360443	0.105115	0.105115	TSS	YBR065C
TIP1:chrII_372845_G_A	0.021113	0.154746	0.268507	0.268507	Upstream	YBR067C
TIP1:chrII_372919_G_A	0.0538713	0.26083	0.702117	0.702117	Upstream	YBR067C
BAP2:chrII_375801_T_C	0.540212	0.787596	0.0590769	-0.0525647	Upstream	YBR068C
HSP26:chrII_381922_A_G	0.863355	0.954797	0.0278392	0.0278392	Upstream	YBR072W
PFF1:chrII_386202_A_G	0.113082	0.386957	0.21235	0.21235	Upstream	YBR074W
SLM4:chrII_392874_A_ATCTTTCCTCTGCATTT	0.744637	0.916744	0.0261747	0.0261747	Upstream	YBR077C
RPG1:chrII_398314_G_A	0.706592	0.882788	-0.0788264	-0.0788264	TSS	YBR079C
RPG1:chrII_398429_T_G	0.292176	0.600824	0.120018	-0.209676	Upstream	YBR079C
TEC1:chrII_408801_T_C	0.326752	0.624492	-0.0509536	-0.0509536	TSS	YBR083W
TEC1:chrII_408838_A_G	0.648444	0.852379	0.0281862	0.0281862	TSS	YBR083W
MIS1:chrII_410961_G_A	0.775436	0.911836	-0.0205754	-0.0205754	TSS	YBR084W
MIS1:chrII_410985_A_G	0.0889704	0.320695	-0.134313	-0.134313	TSS	YBR084W
MIS1:chrII_410998_C_T	0.977272	0.993902	-0.00240766	-0.00240766	TSS	YBR084W
MIS1:chrII_411003_C_T	0.319873	0.614828	-0.0872507	-0.0872507	TSS	YBR084W
RPL19A:chrII_415314_T_A	0.479462	0.745005	-0.0318181	-0.0318181	TSS	YBR084C-A
IST2:chrII_423351_G_A	0.00352054	0.0452748	0.184254	0.184254	TSS	YBR086C
IST2:chrII_423387_G_GGAA	0.0156779	0.12017	-0.175681	-0.175681	TSS	YBR086C
IST2:chrII_423438_GA_G	0.570871	0.807611	0.0303192	0.0303192	TSS	YBR086C
RFC5:chrII_423698_G_T	0.104326	0.35142	0.100781	0.100781	TSS	YBR087W
TIM12:chrII_427545_A_G	0.0436817	0.22173	-0.0974821	-0.0974821	TSS	YBR091C
TIM12:chrII_427659_GTATT_G	0.702292	0.88259	0.0190681	0.0190681	TSS	YBR091C
PHO3:chrII_429183_T_A	0.00421333	0.0516433	-0.243658	-0.243658	TSS	YBR092C
PHO3:chrII_429199_G_A	0.000188206	0.004682	-0.334852	-0.334852	TSS	YBR092C
PBY1:chrII_431851_C_G	0.112693	0.367329	-0.196344	-0.196344	TSS	YBR094W
PBY1:chrII_431912_A_T	0.0794404	0.30298	-0.121285	-0.121285	TSS	YBR094W
RXT2:chrII_435843_G_A	0.0142786	0.124101	-0.289628	-0.289628	Upstream	YBR095C
YMC2:chrII_449537_G_T	0.309664	0.603733	-0.256133	-0.256133	TSS	YBR104W
PHO88:chrII_452575_ATAAG_A	0.378279	0.670185	0.0482053	0.0482053	TSS	YBR106W
IML3:chrII_454587_A_G	0.0207563	0.145486	-0.331593	-0.331593	TSS	YBR107C
IML3:chrII_454598_C_T	0.21825	0.547338	0.194509	0.194509	Upstream	YBR107C
IML3:chrII_454635_A_ATT	0.0172313	0.138538	0.225674	0.225674	Upstream	YBR107C
IML3:chrII_454753_T_C	0.0814143	0.318599	0.385515	0.385515	Upstream	YBR107C
ALG1:chrII_458748_T_C	0.830089	0.935698	-0.0136303	-0.0136303	TSS	YBR110W
ALG1:chrII_458800_C_T	0.878682	0.951639	-0.00908763	-0.00908763	TSS	YBR110W
ALG1:chrII_458813_G_C	0.565458	0.806352	-0.0308242	-0.0308242	TSS	YBR110W
YSA1:chrII_461887_G_C	0.722571	0.887496	0.0541796	0.0541796	TSS	YBR111C
CYC8:chrII_465979_G_A	0.0203733	0.143464	-0.2024	-0.2024	TSS	YBR112C
MUD1:chrII_479153_AG_A	0.817703	0.929726	0.0122523	0.0122523	TSS	YBR119W
MUD1:chrII_479201_G_A	3.82286e-09	4.1437e-07	-0.414221	-0.414221	TSS	YBR119W
MUD1:chrII_479267_C_T	0.0535675	0.247078	0.110022	0.110022	TSS	YBR119W
MUD1:chrII_479272_CAA_CA	0.904527	0.963814	-0.00575365	-0.00575365	TSS	YBR119W
CBP6:chrII_481140_T_C	0.257251	0.557684	-0.0559031	-0.0559031	TSS	YBR120C
CBP6:chrII_481146_T_C	0.454075	0.724943	0.0454898	0.0454898	TSS	YBR120C
MRPL36:chrII_484651_G_C	0.221986	0.51273	-0.456869	-0.456869	TSS	YBR122C
TFC1:chrII_486871_A_G	0.0543616	0.261791	0.268934	0.268934	Upstream	YBR123C
TFC1:chrII_486878_G_A	0.332239	0.668818	0.0719656	0.0719656	Upstream	YBR123C
TPS1:chrII_490619_A_C	0.239518	0.573648	-0.172664	-0.172664	Upstream	YBR126C
HSL7:chrII_504500_A_AG	0.83833	0.938326	-0.0167258	-0.0167258	TSS	YBR133C
HSL7:chrII_504587_C_T	0.823833	0.932961	0.0196436	0.0196436	TSS	YBR133C
CKS1:chrII_504739_G_A	0.985978	0.994915	-0.00156342	-0.00156342	TSS	YBR135W
CKS1:chrII_504741_C_T	0.594865	0.825899	-0.046762	-0.046762	TSS	YBR135W
YBR137W:chrII_512880_T_C	0.277459	0.574312	-0.0676709	-0.0676709	TSS	YBR137W
BMT2:chrII_528069_T_C	0.0117557	0.100401	-0.188197	-0.188197	TSS	YBR141C
BMT2:chrII_528108_T_C	0.851957	0.941458	-0.0107162	-0.0107162	TSS	YBR141C
SUP45:chrII_532216_C_T	0.749344	0.897179	-0.0339647	-0.0339647	TSS	YBR143C
SUP45:chrII_532340_G_GA	0.237144	0.57101	0.217732	0.217732	Upstream	YBR143C
ADH5:chrII_533657_C_T	0.906485	0.964526	-0.00732203	-0.00732203	TSS	YBR145W
MRPS9:chrII_535096_A_T	0.372889	0.665175	0.0705719	0.0705719	TSS	YBR146W
MRPS9:chrII_535193_G_A	0.0827664	0.308216	0.129771	0.129771	TSS	YBR146W
RTC2:chrII_536426_C_A	0.908667	0.964526	0.00746736	0.00746736	TSS	YBR147W
ARA1:chrII_539810_A_T	7.2058e-05	0.00237713	-0.563091	-0.563091	TSS	YBR149W
ARA1:chrII_539825_G_T	0.61994	0.841112	0.0608009	0.0608009	TSS	YBR149W
ARA1:chrII_539861_A_G	0.56932	0.830941	0.0731018	0.0731018	Upstream	YBR149W
ARA1:chrII_539908_G_A	0.567317	0.806352	-0.073305	-0.073305	TSS	YBR149W
APD1:chrII_544773_G_A	0.329735	0.628736	-0.145296	-0.145296	TSS	YBR151W
RPB5:chrII_549229_G_A	0.669206	0.884144	0.0343546	0.0343546	Upstream	YBR154C
CNS1:chrII_549576_A_G	0.873888	0.956036	0.0103513	0.0103513	Upstream	YBR155W
CNS1:chrII_549616_TG_T	0.132607	0.396496	0.160157	0.160157	TSS	YBR155W
SLI15:chrII_553255_C_T	0.0179531	0.131224	0.169403	0.169403	TSS	YBR156C
IFA38:chrII_558567_T_TC	0.419559	0.743145	0.0865403	0.0865403	Upstream	YBR159W
IFA38:chrII_558576_T_C	0.163262	0.443202	-0.256137	-0.256137	TSS	YBR159W
IFA38:chrII_558597_A_C	0.0198044	0.141095	-0.453181	-0.453181	TSS	YBR159W
CDC28:chrII_559922_C_G	0.368821	0.662559	0.102054	0.102054	TSS	YBR160W
CDC28:chrII_559960_C_T	0.438518	0.715923	-0.07761	-0.07761	TSS	YBR160W
CSH1:chrII_561291_T_C	0.639656	0.849981	-0.060577	-0.060577	TSS	YBR161W
YSY6:chrII_565153_A_G	0.0893883	0.321058	0.806298	0.806298	TSS	YBR162W-A
EXO5:chrII_565493_C_T	0.706861	0.882788	0.0157913	0.0157913	TSS	YBR163W
EXO5:chrII_565566_A_G	0.18297	0.466728	-0.0584258	-0.0584258	TSS	YBR163W
UBS1:chrII_568676_G_C	0.0540921	0.247474	-1.24196	-1.24196	TSS	YBR165W
TYR1:chrII_571328_CAA_CAAA	0.488602	0.790336	-0.167014	-0.167014	Upstream	YBR166C
TYR1:chrII_571347_T_A	0.306906	0.643273	-0.408595	-0.408595	Upstream	YBR166C
TYR1:chrII_571349_A_G	0.0749069	0.304504	0.500856	0.500856	Upstream	YBR166C
TYR1:chrII_571362_G_C	0.042578	0.230456	0.427878	0.427878	Upstream	YBR166C
NPL4:chrII_578174_A_C	0.522176	0.774003	-0.0396143	-0.0396143	TSS	YBR170C
SMY2:chrII_581484_G_C	0.538338	0.785456	0.196766	0.196766	TSS	YBR172C
ECM31:chrII_583485_AT_A	0.30658	0.643273	0.116599	0.116599	Upstream	YBR176W
ECM31:chrII_583514_T_C	0.294889	0.588422	-0.10934	-0.10934	TSS	YBR176W
ECM31:chrII_583527_GTAAGATATCCTAAAAAACTAC_G	0.00608019	0.0640702	-0.232215	-0.232215	TSS	YBR176W
ECM31:chrII_583576_T_A	0.0923054	0.328041	-0.162278	-0.162278	TSS	YBR176W
EHT1:chrII_586221_C_T	0.634365	0.846844	-0.0774637	-0.0774637	TSS	YBR177C
EHT1:chrII_586315_G_C	0.0134222	0.119252	-0.257746	-0.257746	Upstream	YBR177C
RPS6B:chrII_592815_A_T	0.891107	0.959045	0.0136345	0.0136345	TSS	YBR181C
RPS6B:chrII_592905_C_T	0.190332	0.474267	-0.114319	-0.114319	TSS	YBR181C
RPS6B:chrII_592938_T_C	0.6308	0.867274	0.0589106	0.0589106	Upstream	YBR181C
YPC1:chrII_595927_T_C	0.95629	0.984261	0.00536421	0.00536421	Upstream	YBR183W
RPS9B:chrII_604449_A_G	0.101848	0.34888	0.227769	0.227769	TSS	YBR189W
MED8:chrII_609798_G_T	0.851664	0.941458	0.0545274	0.0545274	TSS	YBR193C
YBR197C:chrII_615887_A_G	0.378925	0.670185	0.0769992	0.0769992	TSS	YBR197C
YBR197C:chrII_615970_C_G	0.0374056	0.203701	-0.231119	-0.231119	TSS	YBR197C
YBR197C:chrII_615984_GA_G	0.143895	0.41317	-0.139623	-0.139623	TSS	YBR197C
TAF5:chrII_618646_T_C	0.428852	0.708629	0.0876125	0.0876125	TSS	YBR198C
KTR4:chrII_618736_T_G	0.0952231	0.334493	-0.071722	-0.071722	TSS	YBR199W
BEM1:chrII_620680_A_G	0.0758748	0.295231	0.0683597	0.0683597	TSS	YBR200W
DER1:chrII_623413_A_T	0.952181	0.986304	0.00662823	0.00662823	TSS	YBR201W
DER1:chrII_623418_A_T	0.0641806	0.270585	0.189975	0.189975	TSS	YBR201W
DER1:chrII_623427_A_G	0.027642	0.168529	0.24639	0.24639	TSS	YBR201W
MCM7:chrII_624805_G_A	0.304475	0.641235	-0.0686204	-0.0686204	Upstream	YBR202W
MCM7:chrII_624836_C_A	0.849693	0.950508	-0.0158964	-0.0158964	Upstream	YBR202W
LDH1:chrII_633468_T_G	0.066751	0.288599	-0.168434	-0.168434	Upstream	YBR204C
ERV15:chrII_645476_G_A	0.256708	0.591038	0.112951	0.112951	Upstream	YBR210W
NGR1:chrII_647422_C_G	0.072796	0.286558	0.0958345	0.0958345	TSS	YBR212W
HPC2:chrII_653233_AT_A	0.62182	0.841384	-0.0605568	-0.0605568	TSS	YBR215W
HPC2:chrII_653239_G_A	0.193337	0.478611	-0.151609	-0.151609	TSS	YBR215W
HPC2:chrII_653275_A_G	0.0659074	0.274388	-0.297627	-0.297627	TSS	YBR215W
ATG12:chrII_657722_C_T	0.346737	0.644031	0.0712765	0.0712765	TSS	YBR217W
PYC2:chrII_662354_G_A	9.29809e-05	0.00347443	-0.59175	-0.59175	Upstream	YBR218C
PYC2:chrII_662444_G_A	0.536538	0.785134	0.0451012	0.0451012	TSS	YBR218C
SWC5:chrII_683268_A_G	4.74944e-05	0.00216584	-0.399376	-0.399376	Upstream	YBR231C
DAD3:chrII_684840_ATT_ATTTT	0.873371	0.956036	-0.0174151	-0.0174151	Upstream	YBR233W-A
VHC1:chrII_686767_A_G	0.0570878	0.253306	0.188778	0.188778	TSS	YBR235W
VHC1:chrII_686783_G_A	0.197949	0.520678	-0.0872739	-0.0872739	Upstream	YBR235W
ABD1:chrII_691742_T_C	0.083841	0.309183	0.205459	0.205459	TSS	YBR236C
PRP5:chrII_691776_G_T	0.0961402	0.349878	-0.280871	-0.280871	Upstream	YBR237W
PRP5:chrII_691838_G_A	0.469628	0.739534	0.120681	0.120681	TSS	YBR237W
ABD1:chrII_691869_G_A	0.502388	0.759336	-0.0702683	-0.0702683	TSS	YBR236C
PRP5:chrII_691880_A_G	0.16227	0.440905	-0.333679	-0.333679	TSS	YBR237W
PRP5:chrII_691893_T_C	0.721216	0.886911	-0.0782983	-0.0782983	TSS	YBR237W
YBR238C:chrII_697455_C_T	0.10304	0.349807	0.162093	0.162093	TSS	YBR238C
YBR238C:chrII_697507_A_C	0.269133	0.56942	0.101702	0.101702	TSS	YBR238C
ERT1:chrII_700097_T_C	0.0530563	0.259517	-0.205966	-0.205966	Upstream	YBR239C
ERT1:chrII_700199_A_T	0.918582	0.969029	-0.0150119	-0.0150119	TSS	YBR239C
ERT1:chrII_700223_G_C	0.1895	0.474005	-0.184492	-0.184492	TSS	YBR239C
RGD1:chrII_734729_CT_C	0.0121406	0.102637	-0.174718	-0.174718	TSS	YBR260C
RGD1:chrII_734775_G_A	0.0201451	0.142851	-0.168233	-0.168233	TSS	YBR260C
BIT2:chrII_744718_GTT_GT	0.146928	0.416754	0.267317	0.267317	TSS	YBR270C
HSM3:chrII_747841_GT_G	0.602836	0.830884	-0.0674207	-0.0674207	TSS	YBR272C
HSM3:chrII_747926_G_GA	0.777884	0.913299	0.031239	0.031239	TSS	YBR272C
DUG2:chrII_767663_T_C	0.30903	0.603733	-0.053979	-0.053979	TSS	YBR281C
DUG2:chrII_767690_A_T	0.169709	0.451813	0.0625756	0.0625756	TSS	YBR281C
DUG2:chrII_767691_T_C	0.17251	0.454268	0.0599128	0.0599128	TSS	YBR281C
DUG2:chrII_767731_T_C	0.000453187	0.00935663	0.172231	0.172231	TSS	YBR281C
MRPL27:chrII_768073_A_AT	0.14952	0.422924	-0.144767	-0.144767	TSS	YBR282W
MRPL27:chrII_768165_T_A	0.218039	0.509822	-0.17592	-0.17592	TSS	YBR282W
MRPL27:chrII_768183_TA_T	0.641402	0.850946	0.0463765	0.0463765	TSS	YBR282W
MRPL27:chrII_768196_G_A	0.131634	0.395014	0.12842	0.12842	TSS	YBR282W
YBR285W:chrII_773629_G_T	0.00442625	0.0527323	-0.42465	-0.42465	TSS	YBR285W
YBR285W:chrII_773703_C_CAA	0.0332817	0.186022	0.378902	0.378902	TSS	YBR285W
PEX34:chrIII_27364_C_CTTTCT	0.125834	0.385375	-0.0661319	-0.0661319	TSS	YCL056C
LSB5:chrIII_61460_TG_T	0.141432	0.408805	0.189218	0.189218	TSS	YCL034W
LSB5:chrIII_61462_T_C	0.179862	0.464127	0.169274	0.169274	TSS	YCL034W
HBN1:chrIII_74074_T_C	0.406104	0.69321	-0.0797537	-0.0797537	TSS	YCL026C-B
HBN1:chrIII_74146_C_G	3.03298e-21	4.60254e-18	2.00813	2.00813	TSS	YCL026C-B
FRM2:chrIII_75503_C_T	0.369584	0.662559	-0.0834716	-0.0834716	TSS	YCL026C-A
YCL021W-A:chrIII_83421_C_T	0.219054	0.54788	-0.223288	-0.223288	Upstream	YCL021W-A
LEU2:chrIII_91287_A_AATAT	0.953875	0.986711	-0.00689305	-0.00689305	TSS	YCL018W
NFS1:chrIII_94376_T_C	0.185738	0.50285	0.142711	0.142711	Upstream	YCL017C
NFS1:chrIII_94470_T_G	0.000184985	0.00590499	1.02203	1.02203	Upstream	YCL017C
NFS1:chrIII_94503_AAT_A	0.0107278	0.103548	0.318658	0.318658	Upstream	YCL017C
DCC1:chrIII_95815_C_T	0.000714047	0.015876	-1.3874	-1.3874	Upstream	YCL016C
ILV6:chrIII_105664_T_TGTTTTCG	0.0316698	0.179996	0.152	0.152	TSS	YCL009C
PGK1:chrIII_137654_G_T	0.768254	0.907728	0.037496	0.037496	TSS	YCR012W
MAK32:chrIII_152546_A_G	0.016395	0.123165	0.337375	0.337375	TSS	YCR019W
YCR022C:chrIII_158141_C_T	0.152442	0.427137	-0.592883	-0.592883	TSS	YCR022C
SLM5:chrIII_162361_T_C	0.501795	0.758817	-0.0997622	-0.0997622	TSS	YCR024C
YCR024C-B:chrIII_162941_C_A	0.47561	0.743677	0.113897	0.113897	TSS	YCR024C-B
RPS14A:chrIII_178367_G_A	0.170861	0.452895	-0.106317	-0.106317	TSS	YCR031C
RRP43:chrIII_193066_A_G	0.155956	0.431475	0.452845	0.452845	TSS	YCR035C
RRP43:chrIII_193107_C_A	0.940765	0.979971	-0.0206127	-0.0206127	TSS	YCR035C
PHO87:chrIII_197306_T_C	0.0249912	0.160696	-0.177486	-0.177486	TSS	YCR037C
YCR047W-A:chrIII_210472_ATTC_A	0.877902	0.957834	0.0116209	0.0116209	Upstream	YCR047W-A
BUD23:chrIII_211722_GAA_GAAAA	0.566013	0.806352	-0.0795695	-0.0795695	TSS	YCR047C
ARE1:chrIII_211772_G_A	0.0471144	0.246551	0.200668	0.200668	Upstream	YCR048W
SED4:chrIII_236451_G_A	0.163848	0.444397	0.232735	0.232735	TSS	YCR067C
ATG15:chrIII_236969_A_G	0.0782064	0.299869	-0.147852	-0.147852	TSS	YCR068W
ATG15:chrIII_237018_A_G	0.986844	0.994915	-0.00126083	-0.00126083	TSS	YCR068W
RSA4:chrIII_242407_A_G	0.697199	0.879322	-0.068652	-0.068652	TSS	YCR072C
RSA4:chrIII_242447_ATTTT_ATT	0.042365	0.219791	-0.375684	-0.375684	TSS	YCR072C
RSA4:chrIII_242483_G_A	0.722243	0.887452	0.0561142	0.0561142	TSS	YCR072C
SSK22:chrIII_246789_C_A	0.235967	0.529222	-0.118486	-0.118486	TSS	YCR073C
SOL2:chrIII_246813_T_G	0.682991	0.872334	-0.0839921	-0.0839921	TSS	YCR073W-A
SOL2:chrIII_246818_T_A	0.161603	0.468051	0.132189	0.132189	Upstream	YCR073W-A
SOL2:chrIII_246853_G_A	0.787852	0.916142	-0.0577388	-0.0577388	TSS	YCR073W-A
YCR075W-A:chrIII_248847_G_GTT	0.414677	0.700095	0.0630798	0.0630798	TSS	YCR075W-A
YCR075W-A:chrIII_248853_C_T	0.982334	0.994656	0.00168804	0.00168804	TSS	YCR075W-A
AHC2:chrIII_258780_T_G	2.35948e-08	2.31e-06	0.335054	0.335054	TSS	YCR082W
AHC2:chrIII_258781_T_C	0.00374599	0.0475694	-0.14747	-0.14747	TSS	YCR082W
AHC2:chrIII_258828_GT_G	0.667305	0.865086	-0.0197224	-0.0197224	TSS	YCR082W
AHC2:chrIII_258847_A_G	0.886482	0.955763	0.00668692	0.00668692	TSS	YCR082W
TRX3:chrIII_259489_A_G	0.169574	0.452182	-0.265446	0.479274	Upstream	YCR083W
YCR087C-A:chrIII_264610_T_C	0.00156166	0.0289932	0.273948	0.273948	Upstream	YCR087C-A
YCR087C-A:chrIII_264634_G_A	0.0118967	0.110995	-0.235181	-0.235181	Upstream	YCR087C-A
YCR087C-A:chrIII_264642_T_C	0.722124	0.909432	-0.0743322	-0.0743322	Upstream	YCR087C-A
ABP1:chrIII_264887_T_C	0.00114505	0.0231549	0.315179	0.315179	Upstream	YCR088W
PHO13:chrIV_32140_TC_T	0.0390453	0.210466	-0.145538	-0.145538	TSS	YDL236W
TIM22:chrIV_68860_C_A	0.637308	0.870153	0.14915	0.14915	Upstream	YDL217C
RRI1:chrIV_70378_G_GA	0.0297042	0.174427	0.148688	0.148688	TSS	YDL216C
RRI1:chrIV_70457_A_G	0.0684277	0.279562	-0.0814131	-0.0814131	TSS	YDL216C
PRR2:chrIV_76735_ATT_AT	0.366049	0.662559	0.0986771	0.0986771	TSS	YDL214C
PRR2:chrIV_76795_G_C	0.1041	0.351158	-0.123697	-0.123697	TSS	YDL214C
PRR2:chrIV_76825_CAA_CA	0.212066	0.539079	0.173949	0.173949	Upstream	YDL214C
SHR3:chrIV_78264_A_C	0.00959094	0.0893194	0.592605	0.592605	TSS	YDL212W
YDL211C:chrIV_80483_A_G	0.418629	0.703076	-0.0931487	-0.0931487	TSS	YDL211C
YDL211C:chrIV_80506_T_C	0.210067	0.50201	-0.082787	-0.082787	TSS	YDL211C
YDL211C:chrIV_80612_A_G	0.321292	0.65986	0.105807	0.105807	Upstream	YDL211C
CWC2:chrIV_87312_C_T	0.638613	0.849222	-0.0275972	-0.0275972	TSS	YDL209C
GLE1:chrIV_88140_G_GTT	0.0313762	0.178997	0.356695	0.356695	TSS	YDL207W
HEM3:chrIV_93990_C_CT	0.0214221	0.148778	-0.211722	-0.211722	TSS	YDL205C
HEM3:chrIV_94008_T_A	0.0648534	0.271388	-0.186703	-0.186703	TSS	YDL205C
MRPL11:chrIV_98297_T_A	0.668746	0.865086	0.0951784	0.0951784	TSS	YDL202W
MRPL11:chrIV_98322_C_A	0.00151477	0.025122	0.386846	0.386846	TSS	YDL202W
MRPL11:chrIV_98345_T_C	0.174065	0.455421	0.154654	0.154654	TSS	YDL202W
TRM8:chrIV_99407_GAA_GA	0.399985	0.691318	-0.11799	-0.11799	TSS	YDL201W
YDL199C:chrIV_103421_T_G	0.12624	0.385501	-0.1311	-0.1311	TSS	YDL199C
YDL199C:chrIV_103440_G_C	0.119052	0.374816	-0.12077	-0.12077	TSS	YDL199C
YDL199C:chrIV_103444_C_T	0.709741	0.882814	0.0275709	0.0275709	TSS	YDL199C
YDL199C:chrIV_103456_T_C	0.0307421	0.177044	-0.169027	-0.169027	TSS	YDL199C
YDL199C:chrIV_103509_T_C	0.355444	0.652615	0.0826618	0.0826618	TSS	YDL199C
YDL199C:chrIV_103532_G_C	0.0414028	0.227289	-0.263125	-0.263125	Upstream	YDL199C
YDL199C:chrIV_103533_GA_G	0.279093	0.57544	-0.0870476	-0.0870476	TSS	YDL199C
GGC1:chrIV_104599_T_A	0.088273	0.31856	-0.219736	-0.219736	TSS	YDL198C
ARF1:chrIV_116227_A_G	0.579065	0.812887	0.0625582	0.0625582	TSS	YDL192W
ARF1:chrIV_116257_C_T	0.970044	0.992589	-0.00434929	-0.00434929	TSS	YDL192W
YDL187C:chrIV_126538_T_A	0.0275587	0.168529	1.01977	1.01977	TSS	YDL187C
RPL41A:chrIV_130640_G_A	0.308813	0.644298	0.0749088	0.0749088	Upstream	YDL184C
PCL9:chrIV_138088_G_A	0.451791	0.723258	-0.08138	-0.08138	TSS	YDL179W
DLD2:chrIV_139426_C_A	0.0135843	0.119606	0.286594	0.286594	Upstream	YDL178W
YDL177C:chrIV_141921_G_A	0.00936796	0.0877524	-0.189164	-0.189164	TSS	YDL177C
AIR2:chrIV_145562_G_C	0.0186348	0.13498	0.0987882	0.0987882	TSS	YDL175C
AIR2:chrIV_145686_A_G	0.0266901	0.167729	0.0911774	0.0911774	TSS	YDL175C
AIR2:chrIV_145687_T_G	0.0111315	0.0973602	0.131712	0.131712	TSS	YDL175C
UGX2:chrIV_158816_T_TC	0.0772311	0.297835	-0.785834	-0.785834	TSS	YDL169C
SFA1:chrIV_159428_T_C	1.25611e-09	1.58845e-07	0.619807	0.619807	TSS	YDL168W
SFA1:chrIV_159505_T_C	0.0241513	0.157695	0.129113	0.129113	TSS	YDL168W
CDC36:chrIV_164200_A_G	0.734092	0.891544	0.0383727	0.0383727	TSS	YDL165W
CDC36:chrIV_164238_C_T	0.818244	0.929726	0.0253107	0.0253107	TSS	YDL165W
CDC9:chrIV_167436_GC_G	0.71162	0.884426	-0.0313635	-0.0313635	TSS	YDL164C
DHH1:chrIV_172218_T_C	0.0691177	0.281188	-0.103665	-0.103665	TSS	YDL160C
STE7:chrIV_172408_A_T	0.427516	0.708629	-0.0544665	-0.0544665	TSS	YDL159W
CLB3:chrIV_176519_T_C	0.501635	0.796599	0.0481871	0.0481871	Upstream	YDL155W
CLB3:chrIV_176628_C_T	3.77797e-05	0.00141557	0.24962	0.24962	TSS	YDL155W
RPN5:chrIV_190810_C_T	0.0421041	0.219187	0.482236	0.482236	TSS	YDL147W
RPN5:chrIV_190888_C_G	0.183142	0.498757	-0.191648	-0.191648	Upstream	YDL147W
LDB17:chrIV_192451_G_A	0.434138	0.752584	-0.0661918	-0.0661918	Upstream	YDL146W
CCT4:chrIV_199794_T_C	0.848591	0.950251	0.01902	0.01902	Upstream	YDL143W
BPL1:chrIV_202790_A_T	0.145056	0.441893	0.229816	0.229816	Upstream	YDL141W
SCM3:chrIV_212222_A_G	0.307409	0.603484	0.142302	0.142302	TSS	YDL139C
SCM3:chrIV_212228_TTAAAG_T	0.272443	0.572376	0.117329	0.117329	TSS	YDL139C
RGT2:chrIV_213112_A_G	0.774147	0.926665	0.0380726	0.0380726	Upstream	YDL138W
RGT2:chrIV_213154_A_AT	0.321883	0.617128	-0.120264	-0.120264	TSS	YDL138W
RDI1:chrIV_219340_C_A	0.601531	0.830633	0.179593	0.179593	TSS	YDL135C
PPH21:chrIV_221261_A_G	0.434249	0.71207	-0.181434	-0.181434	TSS	YDL134C
RPL41B:chrIV_221893_C_T	0.927921	0.978953	0.0100123	0.0100123	Upstream	YDL133C-A
SRF1:chrIV_222257_G_A	0.756863	0.901435	-0.0666399	-0.0666399	TSS	YDL133W
LYS21:chrIV_227300_A_G	0.727186	0.910602	0.0380441	0.0380441	Upstream	YDL131W
RPP1B:chrIV_229828_G_C	0.912163	0.966625	0.0105236	0.0105236	TSS	YDL130W
RPP1B:chrIV_229843_A_C	0.546358	0.790024	-0.0653734	-0.0653734	TSS	YDL130W
RPP1B:chrIV_229868_T_A	0.914842	0.968031	-0.00970683	-0.00970683	TSS	YDL130W
YDL129W:chrIV_230893_C_T	0.528352	0.778298	-0.124445	-0.124445	TSS	YDL129W
VCX1:chrIV_232542_TAAAAGAAGTTTCCTCTTTCCTAAACTTA_T	7.10463e-05	0.00237713	-0.248439	-0.248439	TSS	YDL128W
CDC48:chrIV_238826_G_T	0.405395	0.73399	0.500523	0.500523	Upstream	YDL126C
HNT1:chrIV_239877_C_T	0.0485116	0.231863	0.108744	0.108744	TSS	YDL125C
HNT1:chrIV_239899_A_G	0.000206675	0.00501806	-0.231378	-0.231378	TSS	YDL125C
HNT1:chrIV_239907_C_T	2.74326e-05	0.00151354	-0.82176	-0.82176	Upstream	YDL125C
YDL124W:chrIV_240090_T_C	0.636647	0.869819	0.101542	0.101542	Upstream	YDL124W
NUP84:chrIV_251392_CT_C	0.202092	0.490637	0.361228	0.361228	TSS	YDL116W
ATG20:chrIV_258728_G_T	0.263658	0.598418	-0.0842868	-0.0842868	Upstream	YDL113C
RRP42:chrIV_264197_G_A	0.139954	0.407249	0.166214	0.166214	TSS	YDL111C
RRP42:chrIV_264290_G_A	0.168003	0.450326	0.138443	0.138443	TSS	YDL111C
TMA17:chrIV_265022_AC_A	0.0123392	0.103739	0.166586	0.166586	TSS	YDL110C
MSS2:chrIV_268714_A_G	0.00244176	0.0349563	-0.302106	-0.302106	TSS	YDL107W
MSS2:chrIV_268735_G_T	0.910129	0.965143	0.0118127	0.0118127	TSS	YDL107W
NSE4:chrIV_272291_A_G	0.0783798	0.310565	0.19417	0.19417	Upstream	YDL105W
QRI7:chrIV_275006_CG_C	0.810407	0.926386	-0.0138094	-0.0138094	TSS	YDL104C
BUG1:chrIV_283285_GA_G	0.937067	0.978664	-0.00715532	-0.00715532	TSS	YDL099W
SNU23:chrIV_285234_C_T	0.494781	0.754224	0.0604538	0.0604538	TSS	YDL098C
SRP14:chrIV_292644_C_T	0.77404	0.9109	-0.0156629	-0.0156629	TSS	YDL092W
SRP14:chrIV_292751_A_G	0.0147708	0.116744	0.129544	0.129544	TSS	YDL092W
ASM4:chrIV_300148_T_A	0.218933	0.511125	-0.0902247	-0.0902247	TSS	YDL088C
ASM4:chrIV_300204_A_T	0.609182	0.835458	0.0392361	0.0392361	TSS	YDL088C
ASM4:chrIV_300254_C_T	0.360207	0.656199	-0.0817582	-0.0817582	TSS	YDL088C
YDL086W:chrIV_301279_C_A	0.15384	0.429036	0.164025	0.164025	TSS	YDL086W
YDL086C-A:chrIV_302250_C_T	0.0455848	0.241373	-0.327344	-0.327344	Upstream	YDL086C-A
YDL086C-A:chrIV_302347_TA_T	0.705942	0.905428	0.128744	0.128744	Upstream	YDL086C-A
YDL085C-A:chrIV_302749_C_T	0.66688	0.882786	0.0574822	0.0574822	Upstream	YDL085C-A
NDE2:chrIV_302868_G_T	0.0415791	0.217199	-0.266872	-0.266872	TSS	YDL085W
RPP1A:chrIV_310329_A_T	0.556933	0.800296	0.104593	0.104593	TSS	YDL081C
NPC2:chrIV_371085_T_C	0.500859	0.796599	-0.0553428	-0.0553428	Upstream	YDL046W
NPC2:chrIV_371142_A_G	0.55556	0.825399	0.0528346	0.0528346	Upstream	YDL046W
MRP10:chrIV_372110_C_T	0.495636	0.754835	-0.106958	-0.106958	TSS	YDL045W-A
FAD1:chrIV_373723_T_C	0.367362	0.662559	0.0681573	0.0681573	TSS	YDL045C
MTF2:chrIV_375394_A_C	0.0202741	0.143352	-0.146687	-0.146687	TSS	YDL044C
SLX5:chrIV_428805_ATT_ATTT	0.368572	0.662559	-0.157006	-0.157006	TSS	YDL013W
SLX5:chrIV_428826_C_T	0.316515	0.611861	-0.146128	-0.146128	TSS	YDL013W
YDL012C:chrIV_431592_T_TTG	0.126246	0.411248	0.116988	0.116988	Upstream	YDL012C
YDL012C:chrIV_431674_G_C	0.502694	0.796599	0.0556784	0.0556784	Upstream	YDL012C
YDL012C:chrIV_432174_C_T	0.828533	0.945153	-0.0229609	-0.0229609	Upstream	YDL012C
APC11:chrIV_433376_G_A	0.0513652	0.239468	0.262478	0.262478	TSS	YDL008W
APC11:chrIV_433396_A_G	0.178165	0.462557	-0.376651	-0.376651	TSS	YDL008W
APC11:chrIV_433401_C_T	0.180596	0.464343	-0.365699	-0.365699	TSS	YDL008W
RPT2:chrIV_437881_C_T	0.712704	0.884612	-0.0264404	-0.0264404	TSS	YDL007W
RPT2:chrIV_437890_T_C	0.827544	0.934754	0.0143603	0.0143603	TSS	YDL007W
RPT2:chrIV_437896_G_A	0.756818	0.901435	-0.0170103	-0.0170103	TSS	YDL007W
RPT2:chrIV_437955_A_G	0.705285	0.882788	0.0295135	0.0295135	TSS	YDL007W
PTC1:chrIV_439479_A_G	0.367336	0.662559	-0.0754027	-0.0754027	TSS	YDL006W
ATP16:chrIV_442843_T_C	0.107081	0.358313	0.108612	0.108612	TSS	YDL004W
ATP16:chrIV_442926_T_C	0.982527	0.994656	0.00142504	0.00142504	TSS	YDL004W
MCD1:chrIV_444482_GATATATATATATATATGTAC_G	0.0330243	0.202312	0.814179	0.814179	Upstream	YDL003W
NTH1:chrIV_452771_C_T	0.00917221	0.0861847	-0.263122	-0.263122	TSS	YDR001C
NTH1:chrIV_452803_T_C	0.278925	0.57544	0.0929529	0.0929529	TSS	YDR001C
NTH1:chrIV_452907_C_CAA	0.000584441	0.0137947	1.23275	1.23275	Upstream	YDR001C
MAF1:chrIV_458282_C_A	0.0175885	0.129881	-0.112347	-0.112347	TSS	YDR005C
TRP1:chrIV_461469_G_C	0.089016	0.335662	0.172243	0.172243	Upstream	YDR007W
RPL4B:chrIV_471707_AT_A	0.0909085	0.324215	0.384575	0.384575	TSS	YDR012W
YDR018C:chrIV_484028_A_G	2.40669e-05	0.000973906	0.82633	0.82633	TSS	YDR018C
GCV1:chrIV_485454_T_C	0.109254	0.379916	0.153076	0.153076	Upstream	YDR019C
ARO3:chrIV_521753_C_T	0.157134	0.433086	0.129992	0.129992	TSS	YDR035W
ARO3:chrIV_521776_C_G	0.908952	0.964526	0.0104295	0.0104295	TSS	YDR035W
RSM10:chrIV_539688_C_T	0.523379	0.775057	-0.0491217	-0.0491217	TSS	YDR041W
YDR042C:chrIV_541267_G_A	0.416653	0.700966	0.0762946	0.0762946	TSS	YDR042C
YDR042C:chrIV_541275_C_T	0.0274868	0.168529	0.18688	0.18688	TSS	YDR042C
HEM13:chrIV_546551_G_GT	0.739568	0.895057	-0.0473174	-0.0473174	TSS	YDR044W
RPC11:chrIV_548546_GT_GTT	0.206858	0.496687	-0.265941	-0.265941	TSS	YDR045C
CDC34:chrIV_562609_GA_G	0.455362	0.726616	-0.0473187	-0.0473187	TSS	YDR054C
TGL2:chrIV_568816_G_A	0.00579259	0.0627875	0.46174	0.46174	TSS	YDR058C
TGL2:chrIV_568863_G_A	0.519331	0.771115	-0.110829	-0.110829	TSS	YDR058C
TGL2:chrIV_568871_G_A	0.000210936	0.00504086	-0.707231	-0.707231	TSS	YDR058C
MAK21:chrIV_570480_T_A	0.980453	0.994656	-0.00138055	-0.00138055	TSS	YDR060W
YDR061W:chrIV_574093_G_A	0.663834	0.863474	0.0377331	0.0377331	TSS	YDR061W
AIM7:chrIV_578452_GTT_GT	0.554129	0.824758	-0.0644823	-0.0644823	Upstream	YDR063W
AIM7:chrIV_578506_A_G	0.44471	0.759262	0.114424	0.114424	Upstream	YDR063W
AIM7:chrIV_578512_T_C	0.000921661	0.0168508	0.477559	0.477559	TSS	YDR063W
AIM7:chrIV_578566_T_A	0.291676	0.58646	-0.129293	-0.129293	TSS	YDR063W
SNF11:chrIV_592224_A_G	0.0981947	0.341767	0.206048	0.206048	TSS	YDR073W
TPS2:chrIV_593642_T_C	3.76046e-06	0.000223785	-0.289801	-0.289801	TSS	YDR074W
TPS2:chrIV_593676_T_C	0.0248028	0.160504	-0.139203	-0.139203	TSS	YDR074W
TPS2:chrIV_593751_C_T	0.550243	0.79282	0.0327016	0.0327016	TSS	YDR074W
PPH3:chrIV_596843_A_T	0.386583	0.675852	-0.165299	-0.165299	TSS	YDR075W
SED1:chrIV_600707_C_T	0.929458	0.978953	0.00816707	0.00816707	Upstream	YDR077W
SED1:chrIV_600712_C_T	0.760056	0.922329	0.0502075	0.0502075	Upstream	YDR077W
SHU2:chrIV_602949_T_A	0.0299044	0.174427	0.417517	0.417517	TSS	YDR078C
SHU2:chrIV_603005_G_A	0.726069	0.888556	-0.0721287	-0.0721287	TSS	YDR078C
VPS41:chrIV_603899_T_C	0.51136	0.765086	-0.0955981	-0.0955981	TSS	YDR080W
SSS1:chrIV_617276_GTTTAA_G	1.4096e-05	0.000644686	-0.288661	-0.288661	TSS	YDR086C
SSS1:chrIV_617323_T_TA	0.188207	0.474005	0.0881111	0.0881111	TSS	YDR086C
RRP1:chrIV_618461_C_T	0.383647	0.674008	0.0595529	0.0595529	TSS	YDR087C
YDR089W:chrIV_621945_C_T	9.43648e-07	0.000162198	-1.02515	-1.02515	Upstream	YDR089W
GIS1:chrIV_636810_TC_T	0.425684	0.707143	-0.0575543	-0.0575543	TSS	YDR096W
TVP15:chrIV_654943_T_C	0.437189	0.714522	-0.0298335	-0.0298335	TSS	YDR100W
DPB4:chrIV_693401_TAA_T	0.720095	0.886608	-0.0639271	-0.0639271	TSS	YDR121W
KIN1:chrIV_694335_G_A	3.60079e-07	2.80216e-05	0.401149	0.401149	TSS	YDR122W
YDR132C:chrIV_720439_T_A	0.221599	0.51273	-0.0904336	-0.0904336	TSS	YDR132C
YDR132C:chrIV_720440_C_T	0.880583	0.95177	-0.0109941	-0.0109941	TSS	YDR132C
YDR132C:chrIV_720543_A_AAAGACAAAAGCAAGCT	0.00154138	0.0254112	-0.251848	-0.251848	TSS	YDR132C
YCF1:chrIV_727626_A_G	0.19999	0.48711	-0.323428	-0.323428	TSS	YDR135C
YCF1:chrIV_727685_A_G	0.0881764	0.31856	0.420171	0.420171	TSS	YDR135C
PEX7:chrIV_741803_G_C	0.0492234	0.233427	-0.124796	-0.124796	TSS	YDR142C
PEX7:chrIV_741894_A_G	0.00839689	0.0810958	-0.195389	-0.195389	TSS	YDR142C
SAN1:chrIV_744041_C_T	0.119529	0.374949	-0.10016	-0.10016	TSS	YDR143C
SAN1:chrIV_744157_G_A	0.566809	0.806352	-0.0347415	-0.0347415	TSS	YDR143C
SAN1:chrIV_744159_T_C	0.261945	0.560138	-0.0642688	-0.0642688	TSS	YDR143C
MKC7:chrIV_746353_CAA_CA	0.102899	0.349807	-0.497086	-0.497086	TSS	YDR144C
TAF12:chrIV_746550_A_C	0.0746695	0.291663	-0.286649	-0.286649	TSS	YDR145W
EKI1:chrIV_751490_G_A	0.798351	0.919194	0.0383912	0.0383912	TSS	YDR147W
KGD2:chrIV_755101_T_C	0.274213	0.572376	-0.119079	-0.119079	TSS	YDR148C
YDR161W:chrIV_778909_A_AT	0.48107	0.74524	-0.083889	-0.083889	TSS	YDR161W
SEC1:chrIV_784282_T_C	0.853762	0.941458	0.0139852	0.0139852	TSS	YDR164C
ARG82:chrIV_811697_T_C	0.293327	0.586847	0.0557206	0.0557206	TSS	YDR173C
ARG82:chrIV_811818_G_A	0.0266007	0.175596	0.329488	0.329488	Upstream	YDR173C
UBC1:chrIV_816631_TAA_TA	0.116942	0.395321	0.101799	0.101799	Upstream	YDR177W
UBC1:chrIV_816707_G_C	0.0245005	0.166373	0.277995	0.277995	Upstream	YDR177W
SDH4:chrIV_817729_G_GT	0.000301607	0.00678057	0.401613	0.401613	TSS	YDR178W
CSN9:chrIV_819242_A_G	0.456944	0.728155	-0.0764451	-0.0764451	TSS	YDR179C
SCC2:chrIV_821075_T_TAAA	0.535036	0.78446	0.0408382	0.0408382	TSS	YDR180W
SCC2:chrIV_821138_G_A	0.0282139	0.169563	0.186943	0.186943	TSS	YDR180W
NUP42:chrIV_844958_G_A	0.343315	0.64136	-0.0715964	-0.0715964	TSS	YDR192C
REF2:chrIV_848316_A_G	0.213958	0.505735	0.0681192	0.0681192	TSS	YDR195W
CBS2:chrIV_851053_A_C	0.243136	0.579507	0.137461	0.137461	Upstream	YDR197W
MSS4:chrIV_867984_TA_T	0.614129	0.838453	0.0306886	0.0306886	TSS	YDR208W
MSS4:chrIV_867989_A_G	0.0104471	0.102163	-0.270798	-0.270798	Upstream	YDR208W
MSS4:chrIV_868027_G_A	0.0052252	0.0587803	0.220919	0.220919	TSS	YDR208W
YDR210W:chrIV_870950_G_GT	0.168834	0.451141	0.247191	0.247191	TSS	YDR210W
YDR210W:chrIV_871042_G_T	0.48389	0.746822	0.132949	0.132949	TSS	YDR210W
TCP1:chrIV_887044_A_G	0.0511611	0.239468	-0.134696	-0.134696	TSS	YDR212W
TCP1:chrIV_887046_AT_A	0.927725	0.975284	0.00503496	0.00503496	TSS	YDR212W
CRF1:chrIV_911925_G_T	0.140773	0.408805	-0.112061	-0.112061	TSS	YDR223W
COX20:chrIV_926985_T_C	0.248084	0.584443	0.0814094	0.0814094	Upstream	YDR231C
COX20:chrIV_927194_C_A	0.12259	0.405165	-0.143546	-0.143546	Upstream	YDR231C
SEC26:chrIV_940972_G_C	0.517053	0.802888	0.052537	0.052537	Upstream	YDR238C
VHS1:chrIV_955620_A_C	0.967171	0.992023	0.013121	0.013121	TSS	YDR247W
BTT1:chrIV_963291_G_A	0.3845	0.674045	0.177282	0.177282	TSS	YDR252W
CHL4:chrIV_964930_C_A	0.527441	0.777845	0.095312	0.095312	TSS	YDR254W
CHL4:chrIV_964950_A_G	0.335736	0.634075	0.115072	0.115072	TSS	YDR254W
YAP6:chrIV_976264_A_G	0.153514	0.453139	0.146834	0.146834	Upstream	YDR259C
YAP6:chrIV_976271_T_C	0.0084025	0.0904838	0.342013	0.342013	Upstream	YDR259C
SWM1:chrIV_977331_ATTT_ATT	0.19256	0.477856	-0.0612618	-0.0612618	TSS	YDR260C
YDR262W:chrIV_993025_T_A	0.100595	0.360223	-0.42868	-0.42868	Upstream	YDR262W
AKR1:chrIV_998484_T_C	6.15337e-07	0.00013095	-0.69685	-0.69685	Upstream	YDR264C
PEX10:chrIV_998628_A_T	0.188142	0.505901	0.217312	0.217312	Upstream	YDR265W
HEL2:chrIV_1002291_AT_A	0.13235	0.396136	0.175165	0.175165	TSS	YDR266C
MSW1:chrIV_1003824_C_T	0.000377479	0.00812517	-0.245221	-0.245221	TSS	YDR268W
PHM6:chrIV_1022417_A_G	0.292901	0.58646	0.170629	0.170629	TSS	YDR281C
DPL1:chrIV_1052356_AT_A	0.311377	0.6054	-0.109527	-0.109527	TSS	YDR294C
MHR1:chrIV_1055136_G_GA	0.81711	0.929726	-0.0145339	-0.0145339	TSS	YDR296W
ATP5:chrIV_1059080_G_A	0.238264	0.531713	0.103844	0.103844	TSS	YDR298C
ATP5:chrIV_1059094_C_T	0.997763	0.99908	-0.000239549	-0.000239549	TSS	YDR298C
ATP5:chrIV_1059459_A_C	0.743019	0.916201	-0.0452394	-0.0452394	Upstream	YDR298C
RSC3:chrIV_1071689_A_G	0.802346	0.922045	-0.0281784	-0.0281784	TSS	YDR303C
RSC3:chrIV_1071771_G_A	0.0829823	0.308437	0.177543	0.177543	TSS	YDR303C
YFT2:chrIV_1105909_ATT_AT	1.04384e-05	0.000502863	0.563763	0.563763	TSS	YDR319C
SWA2:chrIV_1108233_C_CAT	0.866747	0.946591	-0.0195097	-0.0195097	TSS	YDR320C
ASP1:chrIV_1108564_G_A	0.471416	0.740549	0.072989	0.072989	TSS	YDR321W
ASP1:chrIV_1108600_GAAA_GA	0.502679	0.759397	0.0528706	0.0528706	TSS	YDR321W
ASP1:chrIV_1108662_G_A	0.511193	0.765086	0.0547388	0.0547388	TSS	YDR321W
PEP7:chrIV_1114179_A_ATT	0.453919	0.724943	-0.137321	-0.137321	TSS	YDR323C
RQC1:chrIV_1135584_C_T	0.17951	0.464127	0.227819	0.227819	TSS	YDR333C
YDR338C:chrIV_1149565_G_A	0.866406	0.946559	0.00860958	0.00860958	TSS	YDR338C
FCF1:chrIV_1150593_T_G	0.0112714	0.0983007	-0.137976	-0.137976	TSS	YDR339C
TRP4:chrIV_1184604_T_A	0.217736	0.509505	-0.275801	-0.275801	TSS	YDR354W
CNL1:chrIV_1189652_T_C	0.252502	0.55212	0.119385	0.119385	TSS	YDR357C
CNL1:chrIV_1189750_T_C	0.892562	0.959591	0.00943149	0.00943149	TSS	YDR357C
RPP2B:chrIV_1239354_C_A	0.040113	0.212466	-0.271915	-0.271915	TSS	YDR382W
DIT1:chrIV_1274423_C_T	0.0193914	0.139459	-0.26503	-0.26503	TSS	YDR403W
DIT1:chrIV_1274484_G_A	0.347938	0.645471	-0.127251	-0.127251	TSS	YDR403W
DIT1:chrIV_1274509_T_A	0.000146222	0.00385482	-0.534808	-0.534808	TSS	YDR403W
MRP20:chrIV_1277377_A_T	0.781676	0.93075	0.0510126	0.0510126	Upstream	YDR405W
MRP20:chrIV_1277378_T_C	0.0528861	0.259517	-0.286992	-0.286992	Upstream	YDR405W
SIP1:chrIV_1317903_G_C	0.641784	0.850946	0.0726294	0.0726294	TSS	YDR422C
DOT1:chrIV_1342306_G_T	0.0123751	0.103752	0.34886	0.34886	TSS	YDR440W
YDR442W:chrIV_1345539_T_C	0.00588088	0.0722024	0.242943	0.242943	Upstream	YDR442W
YDR442W:chrIV_1345604_C_T	0.128229	0.413359	0.23617	0.23617	Upstream	YDR442W
YDR444W:chrIV_1350135_T_C	0.900174	0.963814	-0.0219317	-0.0219317	TSS	YDR444W
SDC1:chrIV_1398909_C_T	0.210483	0.502214	-0.20915	-0.20915	TSS	YDR469W
SDC1:chrIV_1398960_CA_C	0.064092	0.270585	-0.322933	-0.322933	TSS	YDR469W
UGO1:chrIV_1401418_A_C	0.745477	0.917273	-0.0263623	-0.0263623	Upstream	YDR470C
YDR476C:chrIV_1411151_C_T	0.288139	0.584218	0.0697749	0.0697749	TSS	YDR476C
YDR476C:chrIV_1411239_G_A	0.854047	0.941458	-0.01108	-0.01108	TSS	YDR476C
YDR476C:chrIV_1411263_A_G	0.224148	0.51537	0.0734179	0.0734179	TSS	YDR476C
SNF1:chrIV_1412047_A_G	0.197705	0.52065	0.192593	0.192593	Upstream	YDR477W
PEX29:chrIV_1416927_A_G	0.083029	0.308437	-0.166316	-0.166316	TSS	YDR479C
PEX29:chrIV_1416976_G_A	0.349262	0.646348	-0.107765	-0.107765	TSS	YDR479C
IZH1:chrIV_1434754_C_G	0.984479	0.994915	-0.00198535	-0.00198535	TSS	YDR492W
ITR1:chrIV_1445641_T_C	7.81252e-05	0.00254957	-0.3617	-0.3617	TSS	YDR497C
LCD1:chrIV_1447777_G_A	0.503559	0.796599	0.226623	0.226623	Upstream	YDR499W
LCD1:chrIV_1447808_C_A	0.0733572	0.288019	0.0831882	0.0831882	TSS	YDR499W
RPL37B:chrIV_1450894_C_T	0.627207	0.845425	0.0254467	0.0254467	TSS	YDR500C
RPL37B:chrIV_1450897_A_G	0.411886	0.698092	-0.0488123	-0.0488123	TSS	YDR500C
RPL37B:chrIV_1450914_T_C	0.404029	0.692182	-0.0412572	-0.0412572	TSS	YDR500C
RPL37B:chrIV_1450998_G_A	0.449442	0.722488	0.0364495	0.0364495	TSS	YDR500C
RPL37B:chrIV_1451009_A_T	0.681058	0.89038	-0.0282604	-0.0282604	Upstream	YDR500C
GIN4:chrIV_1465952_G_A	5.45447e-05	0.0023666	0.828272	0.828272	Upstream	YDR507C
GNP1:chrIV_1468506_CAA_CAAA	0.156306	0.432047	-0.143209	-0.143209	TSS	YDR508C
GNP1:chrIV_1468562_G_A	0.00986271	0.089981	0.238125	0.238125	TSS	YDR508C
GNP1:chrIV_1469241_G_GA	0.128668	0.413682	-0.120101	-0.120101	Upstream	YDR508C
SMT3:chrIV_1469246_G_A	0.0283553	0.183121	0.177552	0.177552	Upstream	YDR510W
SMT3:chrIV_1469271_A_G	0.489909	0.790346	-0.135794	-0.135794	Upstream	YDR510W
GNP1:chrIV_1469289_T_A	0.04145	0.227289	-0.238989	-0.238989	Upstream	YDR508C
SMT3:chrIV_1469311_T_A	0.355307	0.688581	0.0980411	0.0980411	Upstream	YDR510W
SDH7:chrIV_1469888_C_T	0.0291934	0.185584	-0.247351	-0.247351	Upstream	YDR511W
SLF1:chrIV_1473079_C_A	0.0133796	0.119111	-0.199309	-0.199309	Upstream	YDR515W
EMI2:chrIV_1476572_A_G	0.294013	0.629528	0.131775	0.131775	Upstream	YDR516C
EMI2:chrIV_1476639_TTC_T	0.0817598	0.305969	0.102561	0.102561	TSS	YDR516C
AGE1:chrIV_1489122_T_C	6.52164e-12	2.39879e-09	-0.546299	-0.546299	TSS	YDR524C
QCR7:chrIV_1496691_C_A	0.0727024	0.301913	-0.179782	-0.179782	Upstream	YDR529C
CAB1:chrIV_1498087_C_G	0.0509525	0.256716	0.357551	0.357551	Upstream	YDR531W
HSP31:chrIV_1502303_C_G	0.0979362	0.341274	0.175409	0.175409	TSS	YDR533C
FIT1:chrIV_1504938_G_A	0.00435376	0.052228	0.346299	0.346299	TSS	YDR534C
FIT1:chrIV_1504947_A_G	0.037043	0.202568	-0.203025	-0.203025	TSS	YDR534C
FIT1:chrIV_1504951_C_G	0.378762	0.670185	0.0787905	0.0787905	TSS	YDR534C
FIT1:chrIV_1504971_C_A	0.00530669	0.0587803	0.315875	0.315875	TSS	YDR534C
STL1:chrIV_1507893_G_T	0.00196359	0.0304056	-0.278226	-0.278226	TSS	YDR536W
IRC4:chrIV_1517833_A_G	0.972591	0.992589	-0.00701443	-0.00701443	TSS	YDR540C
IRC4:chrIV_1517858_G_GA	0.642135	0.850976	-0.153244	-0.153244	TSS	YDR540C
IRC4:chrIV_1517934_CG_AG	0.903283	0.963814	-0.0277082	-0.0277082	TSS	YDR540C
YDR541C:chrIV_1520921_A_G	0.103036	0.349807	0.0742935	0.0742935	TSS	YDR541C
YDR541C:chrIV_1521015_T_C	0.0840401	0.325173	-0.139169	-0.139169	Upstream	YDR541C
RMD6:chrV_13447_C_T	0.331894	0.630744	-0.150249	-0.150249	TSS	YEL072W
RMD6:chrV_13449_G_T	0.668806	0.865086	0.0681932	0.0681932	TSS	YEL072W
RMD6:chrV_13454_C_T	0.907909	0.964526	-0.0225089	-0.0225089	TSS	YEL072W
RMD6:chrV_13493_CT_C	0.932582	0.976851	-0.0157386	-0.0157386	TSS	YEL072W
RMD6:chrV_13502_T_C	0.707635	0.882788	-0.0612912	-0.0612912	TSS	YEL072W
HPA3:chrV_26594_G_A	0.327114	0.664487	0.0735429	0.0735429	Upstream	YEL066W
SIT1:chrV_27604_C_T	0.766969	0.906798	-0.0283388	-0.0283388	TSS	YEL065W
CAN1:chrV_33782_C_A	0.0404866	0.225323	0.187532	0.187532	Upstream	YEL063C
NPR2:chrV_34324_T_TA	0.00837424	0.0810958	0.211065	0.211065	TSS	YEL062W
CIN8:chrV_39664_C_T	0.359909	0.65605	0.0808786	0.0808786	TSS	YEL061C
SOM1:chrV_42780_C_G	0.127148	0.386387	0.0717618	0.0717618	TSS	YEL059C-A
YEL057C:chrV_45816_A_G	0.310656	0.604385	-0.223312	-0.223312	TSS	YEL057C
HAT2:chrV_47089_T_C	0.960866	0.989481	0.00347263	0.00347263	TSS	YEL056W
HAT2:chrV_47091_A_G	0.572913	0.807989	0.0465869	0.0465869	TSS	YEL056W
MAK10:chrV_56315_T_C	0.15666	0.432632	0.237637	0.237637	TSS	YEL053C
VMA8:chrV_58245_T_C	0.504713	0.7602	-0.0781703	-0.0781703	TSS	YEL051W
VMA8:chrV_58267_G_A	0.546379	0.790024	-0.0609145	-0.0609145	TSS	YEL051W
RML2:chrV_61028_T_C	0.261364	0.560138	0.0429365	0.0429365	TSS	YEL050C
GDA1:chrV_73474_CT_CTT	0.797056	0.91809	-0.0325639	-0.0325639	TSS	YEL042W
YEF1:chrV_75731_T_G	0.00888499	0.0841994	0.484757	0.484757	TSS	YEL041W
YEF1:chrV_75745_A_G	0.661583	0.862194	0.0842179	0.0842179	TSS	YEL041W
UTR2:chrV_77918_C_T	0.0706282	0.283397	0.322611	0.322611	TSS	YEL040W
CYC7:chrV_80182_T_C	0.0065092	0.0769566	0.325746	0.325746	Upstream	YEL039C
UTR4:chrV_80303_T_A	0.0087862	0.0923894	-0.260907	-0.260907	Upstream	YEL038W
UTR4:chrV_80396_G_A	0.119323	0.374891	-0.153563	-0.153563	TSS	YEL038W
UTR4:chrV_80437_G_C	0.839034	0.938537	0.0163709	0.0163709	TSS	YEL038W
YEL028W:chrV_98040_A_G	0.109699	0.380035	0.111097	0.111097	Upstream	YEL028W
TIM9:chrV_117057_C_G	0.166594	0.448239	-0.153888	-0.153888	TSS	YEL020W-A
TIM9:chrV_117072_C_T	0.755605	0.901435	-0.0251118	-0.0251118	TSS	YEL020W-A
TIM9:chrV_117134_T_C	0.850321	0.941458	-0.0156874	-0.0156874	TSS	YEL020W-A
UBC8:chrV_131540_C_A	0.0710825	0.283951	-0.158404	-0.158404	TSS	YEL012W
PAC2:chrV_164498_T_C	0.759425	0.902255	-0.0621097	-0.0621097	TSS	YER007W
SPC25:chrV_192719_G_A	0.695111	0.879154	-0.0518791	-0.0518791	TSS	YER018C
SPC25:chrV_192792_GA_G	0.873627	0.950827	0.0189925	0.0189925	TSS	YER018C
ISC1:chrV_192377_T_G	0.382694	0.67371	0.08566	0.08566	TSS	YER019W
SBH2:chrV_194625_T_A	0.804249	0.93578	-0.0231071	-0.0231071	Upstream	YER019C-A
SBH2:chrV_194646_T_G	0.0523371	0.242879	0.326875	0.326875	TSS	YER019C-A
SBH2:chrV_194686_A_G	0.0745856	0.304504	-0.233681	-0.233681	Upstream	YER019C-A
SBH2:chrV_194693_GAA_GAAA	0.305481	0.642747	0.107438	0.107438	Upstream	YER019C-A
SBH2:chrV_194707_C_T	0.0968872	0.33838	0.238924	0.238924	TSS	YER019C-A
SBH2:chrV_194719_G_A	0.0233197	0.15555	0.344163	0.344163	TSS	YER019C-A
RPN3:chrV_196794_C_T	0.0068213	0.0789581	0.37596	0.37596	Upstream	YER021W
RPN3:chrV_196832_C_T	0.0462193	0.227541	-0.0912735	-0.0912735	TSS	YER021W
SRB4:chrV_198669_G_T	0.420529	0.703198	-0.0303753	-0.0303753	TSS	YER022W
SRB4:chrV_198741_T_TA	0.847162	0.941458	-0.00631593	-0.00631593	TSS	YER022W
PRO3:chrV_200908_T_C	0.023484	0.155558	0.552311	0.552311	TSS	YER023W
CHO1:chrV_208551_G_GAA	0.3293	0.666807	0.0871284	0.0871284	Upstream	YER026C
MIG3:chrV_211987_C_G	0.0221416	0.157421	-0.383888	-0.383888	Upstream	YER028C
CHZ1:chrV_213244_G_A	0.950224	0.982497	-0.00881794	-0.00881794	Upstream	YER030W
YPT31:chrV_214893_C_T	0.498963	0.755665	0.160537	0.160537	TSS	YER031C
EDC2:chrV_222505_TA_T	3.39543e-09	3.81672e-07	-0.544248	-0.544248	TSS	YER035W
YEN1:chrV_232364_G_C	0.906009	0.969996	0.0174529	0.0174529	Upstream	YER041W
ACA1:chrV_241759_C_T	0.835623	0.937409	0.0188136	0.0188136	TSS	YER045C
ACA1:chrV_241799_C_A	0.546311	0.790024	0.0574517	0.0574517	TSS	YER045C
ACA1:chrV_241800_C_G	0.120734	0.375937	-0.173769	-0.173769	TSS	YER045C
ACA1:chrV_241849_G_A	0.934801	0.977981	-0.00945763	-0.00945763	TSS	YER045C
SPO73:chrV_243107_C_T	0.0445363	0.222488	-0.22088	-0.22088	TSS	YER046W
SPO73:chrV_243157_A_C	0.17998	0.464127	-0.104828	-0.104828	TSS	YER046W
ISD11:chrV_250528_C_A	0.0624338	0.279711	0.128022	0.128022	Upstream	YER048W-A
ISD11:chrV_250573_G_A	0.00470747	0.0549507	0.290915	0.290915	TSS	YER048W-A
ISD11:chrV_250605_T_C	0.0211614	0.154746	0.227967	0.227967	Upstream	YER048W-A
ISD11:chrV_250625_G_A	0.103669	0.350764	0.169955	0.169955	TSS	YER048W-A
TPA1:chrV_251561_GAA_GA	0.285065	0.61993	0.250484	0.250484	Upstream	YER049W
HOM3:chrV_258078_G_A	0.173394	0.454448	-0.182822	-0.182822	TSS	YER052C
HOM3:chrV_258177_GA_GAA	0.180194	0.494042	0.139564	0.139564	Upstream	YER052C
PIC2:chrV_259743_C_T	0.377998	0.710112	-0.152028	-0.152028	Upstream	YER053C
PIC2:chrV_259747_GAA_GA	0.531079	0.809602	0.0761993	0.0761993	Upstream	YER053C
YER053C-A:chrV_261193_A_T	0.00576858	0.0627875	-0.311518	-0.311518	TSS	YER053C-A
HIS1:chrV_265875_C_T	0.335771	0.673416	0.161655	0.161655	Upstream	YER055C
HIS1:chrV_265876_G_A	0.203088	0.527369	0.183473	0.183473	Upstream	YER055C
HIS1:chrV_265937_T_C	0.129301	0.392036	-0.132955	-0.132955	TSS	YER055C
FCY2:chrV_268219_G_A	0.000708118	0.0158229	0.344337	0.344337	Upstream	YER056C
FCY2:chrV_268231_C_T	0.25669	0.591038	-0.0992852	-0.0992852	Upstream	YER056C
RPL34A:chrV_270213_A_T	0.469979	0.739534	-0.204685	-0.204685	TSS	YER056C-A
HMF1:chrV_271177_C_T	0.109509	0.362837	0.119908	0.119908	TSS	YER057C
HMF1:chrV_271202_T_C	0.006093	0.0640702	-0.351879	-0.351879	TSS	YER057C
VTC1:chrV_302655_T_C	0.18899	0.474005	0.0430065	0.0430065	TSS	YER072W
SER3:chrV_322554_G_C	0.0102758	0.0919032	0.16655	0.16655	TSS	YER081W
ILV1:chrV_328320_GA_G	0.791552	0.917414	0.0347015	0.0347015	TSS	YER086W
SBH1:chrV_332992_GA_G	0.244616	0.540097	0.212934	0.212934	TSS	YER087C-B
DOT6:chrV_335293_AAAAGAGAGAAAAAATACAACAAGATACCAAACAGGACG_A	0.646853	0.873349	-0.0531969	-0.0531969	Upstream	YER088C
DOT6:chrV_335406_G_GT	0.666295	0.882535	0.0315166	0.0315166	Upstream	YER088C
IES5:chrV_342707_C_T	0.115354	0.370474	-0.0967843	-0.0967843	TSS	YER092W
RPS8B:chrV_362609_C_T	0.42033	0.703198	0.0942958	0.0942958	TSS	YER102W
NUP157:chrV_372057_T_C	0.817936	0.929726	0.0561905	0.0561905	TSS	YER105C
NUP157:chrV_372082_C_CT	0.885476	0.961885	0.0247708	0.0247708	Upstream	YER105C
GLE2:chrV_374814_TGCAA_TA	0.0814349	0.305129	0.42273	0.42273	TSS	YER107C
GLE2:chrV_374819_A_C	0.106058	0.356146	0.411747	0.411747	TSS	YER107C
BOI2:chrV_394021_C_T	0.239459	0.533205	0.0945887	0.0945887	TSS	YER114C
BOI2:chrV_394074_GT_G	0.0220614	0.150803	0.197805	0.197805	TSS	YER114C
BOI2:chrV_394151_C_G	0.835132	0.937409	-0.023115	-0.023115	TSS	YER114C
SPR6:chrV_395202_CAAAA_CAAA	0.178847	0.463806	0.158002	0.158002	TSS	YER115C
AVT6:chrV_400882_A_G	0.309577	0.603733	-0.17171	-0.17171	TSS	YER119C
AVT6:chrV_400915_T_C	0.291479	0.58646	-0.203603	-0.203603	TSS	YER119C
AVT6:chrV_400988_CT_C	0.418821	0.703076	-0.138854	-0.138854	TSS	YER119C
DSE1:chrV_409170_T_C	0.0514905	0.239683	0.144429	0.144429	TSS	YER124C
COM2:chrV_422560_C_T	0.351491	0.648295	0.0872888	0.0872888	TSS	YER130C
COM2:chrV_422613_G_C	0.779998	0.913834	0.0239469	0.0239469	TSS	YER130C
RTR1:chrV_451448_T_G	0.141114	0.408805	0.174824	0.174824	TSS	YER139C
MAG1:chrV_456087_A_G	0.258691	0.592533	-0.13674	-0.13674	Upstream	YER142C
FTR1:chrV_461877_C_CCACCGCTTCCACCGCTTT	0.85644	0.952457	-0.0160968	-0.0160968	Upstream	YER145C
PEA2:chrV_467553_T_C	0.985721	0.994915	-0.000807346	-0.000807346	TSS	YER149C
PEA2:chrV_468194_T_C	0.0467817	0.245529	-0.192703	-0.192703	Upstream	YER149C
COG3:chrV_484412_G_C	0.0123465	0.11244	-0.176713	-0.176713	Upstream	YER157W
COG3:chrV_484694_G_A	0.189366	0.474005	0.248632	0.248632	TSS	YER157W
BUR6:chrV_492146_G_A	0.134475	0.398957	-0.199536	-0.199536	TSS	YER159C
SPT2:chrV_500524_C_G	0.201769	0.526389	-0.257316	-0.257316	Upstream	YER161C
GCG1:chrV_503840_T_C	0.183708	0.466944	-0.187528	-0.187528	TSS	YER163C
GCG1:chrV_503864_T_C	0.0275889	0.168529	-0.466994	-0.466994	TSS	YER163C
GCG1:chrV_503909_T_A	0.0367535	0.213676	0.278651	0.278651	Upstream	YER163C
GCG1:chrV_503928_T_C	0.0224234	0.15157	-0.29526	-0.29526	TSS	YER163C
PAB1:chrV_510191_G_A	0.879533	0.951639	0.0218009	0.0218009	TSS	YER165W
CCA1:chrV_522739_A_C	0.0163401	0.134731	0.222792	0.222792	Upstream	YER168C
CCA1:chrV_522810_T_TG	0.0863126	0.329966	0.175209	0.175209	Upstream	YER168C
ADK2:chrV_525802_G_A	0.00118422	0.0201917	0.18467	0.18467	TSS	YER170W
ADK2:chrV_525863_C_A	0.0212124	0.14766	-0.122581	-0.122581	TSS	YER170W
TMT1:chrV_540409_C_A	0.877923	0.951639	-0.0170256	-0.0170256	TSS	YER175C
YER175W-A:chrV_539462_T_G	0.180575	0.464343	0.102551	0.102551	TSS	YER175W-A
ECM32:chrV_541505_ATT_AT	0.0471306	0.227541	0.495705	0.495705	TSS	YER176W
ECM32:chrV_541518_T_C	0.169492	0.451813	0.329902	0.329902	TSS	YER176W
ECM32:chrV_541538_T_A	0.0444021	0.222488	0.497578	0.497578	TSS	YER176W
ECM32:chrV_541549_T_A	0.830903	0.935729	0.0483526	0.0483526	TSS	YER176W
PDA1:chrV_546667_T_C	0.0620888	0.266294	-0.304939	-0.304939	TSS	YER178W
ISC10:chrV_550566_C_T	0.0142885	0.11382	0.256046	0.256046	TSS	YER180C
SLO1:chrV_551265_T_C	0.42858	0.708629	-0.176261	-0.176261	TSS	YER180C-A
SLO1:chrV_551283_A_AAG	0.634679	0.846844	0.0808517	0.0808517	TSS	YER180C-A
SLO1:chrV_551284_T_TA	0.0882342	0.31856	0.249432	0.249432	TSS	YER180C-A
FMP10:chrV_552479_C_A	0.0989016	0.342265	-0.178234	-0.178234	TSS	YER182W
FMP10:chrV_552374_A_G	0.000530938	0.0128257	0.772595	0.772595	Upstream	YER182W
FAU1:chrV_554060_G_T	0.721511	0.886911	0.0343108	0.0343108	TSS	YER183C
YER186C:chrV_562916_G_C	0.126604	0.38562	-0.24268	-0.24268	TSS	YER186C
YFL054C:chrVI_22905_C_T	0.612146	0.857312	0.0913137	0.0913137	Upstream	YFL054C
YFL054C:chrVI_22923_A_G	0.0679968	0.279256	-0.500308	-0.500308	TSS	YFL054C
YFL054C:chrVI_22927_T_C	0.00610092	0.0640702	-0.716982	-0.716982	TSS	YFL054C
YFL054C:chrVI_22967_TTATGA_T	0.12398	0.381709	-0.320228	-0.320228	TSS	YFL054C
ALR2:chrVI_36663_A_AT	0.0687138	0.294813	0.227378	0.227378	Upstream	YFL050C
EMP47:chrVI_40232_A_C	0.113543	0.368186	0.233839	0.233839	TSS	YFL048C
RGD2:chrVI_40338_A_T	0.538812	0.785456	0.0770871	0.0770871	TSS	YFL047W
FMP32:chrVI_42684_T_C	0.343493	0.64136	0.11015	0.11015	TSS	YFL046W
FMP32:chrVI_42772_T_A	0.239138	0.533205	-0.149969	-0.149969	TSS	YFL046W
SEC53:chrVI_44552_A_G	0.0346076	0.205394	0.295714	0.295714	Upstream	YFL045C
YPT1:chrVI_56091_C_CT	0.986397	0.994915	0.00210734	0.00210734	TSS	YFL038C
YFL031C-A:chrVI_76682_A_G	3.32506e-05	0.0017482	-0.609584	-0.609584	Upstream	YFL031C-A
CAK1:chrVI_79343_G_C	0.080992	0.304489	0.187049	0.187049	TSS	YFL029C
CAF16:chrVI_80328_T_A	0.0412297	0.226916	0.15092	0.15092	Upstream	YFL028C
BST1:chrVI_87400_C_T	0.266134	0.565009	0.220391	0.220391	TSS	YFL025C
BST1:chrVI_87438_A_G	0.271088	0.572205	-0.250799	-0.250799	TSS	YFL025C
EPL1:chrVI_90659_C_T	0.00963804	0.0893194	0.786716	0.786716	TSS	YFL024C
EPL1:chrVI_90767_C_T	0.166495	0.448239	0.58686	0.58686	TSS	YFL024C
BUD27:chrVI_90851_C_A	0.548375	0.820177	0.139308	0.139308	Upstream	YFL023W
GAT1:chrVI_95849_T_C	0.0143931	0.124389	0.267979	0.267979	Upstream	YFL021W
GAT1:chrVI_95926_A_C	0.0215059	0.149019	0.450734	0.450734	TSS	YFL021W
PAU5:chrVI_99734_A_G	0.931416	0.976796	-0.00760429	-0.00760429	TSS	YFL020C
PAU5:chrVI_99800_C_G	0.275447	0.574164	0.094554	0.094554	TSS	YFL020C
PAU5:chrVI_99817_G_A	0.55857	0.827121	-0.0653906	-0.0653906	Upstream	YFL020C
SMX2:chrVI_103548_G_A	0.124625	0.382832	-0.116337	-0.116337	TSS	YFL017W-A
SMX2:chrVI_103553_G_A	0.000419274	0.00877583	-0.285077	-0.285077	TSS	YFL017W-A
HSP12:chrVI_107085_T_C	0.669644	0.884144	-0.0453978	-0.0453978	Upstream	YFL014W
HSP12:chrVI_107101_T_A	0.000756071	0.0162446	0.431244	0.431244	Upstream	YFL014W
SMC1:chrVI_119276_A_G	0.112551	0.367329	-0.321022	-0.321022	TSS	YFL008W
SMC1:chrVI_119284_GAAA_GAA	0.277664	0.574312	-0.197712	-0.197712	TSS	YFL008W
SMC1:chrVI_119328_T_C	0.165518	0.446928	-0.256961	-0.256961	TSS	YFL008W
SEC4:chrVI_130058_T_A	0.0274916	0.179768	0.162178	0.162178	Upstream	YFL005W
VTC2:chrVI_131646_T_C	0.41294	0.739651	0.0732668	0.0732668	Upstream	YFL004W
DEG1:chrVI_147039_GA_G	0.000377588	0.00981071	0.506726	0.506726	Upstream	YFL001W
SPB4:chrVI_147065_A_T	0.0263152	0.174309	0.257525	0.257525	Upstream	YFL002C
SPB4:chrVI_147067_A_T	0.473543	0.781485	0.0798473	0.0798473	Upstream	YFL002C
SPB4:chrVI_147079_T_TTG	0.458857	0.770054	0.077239	0.077239	Upstream	YFL002C
LOC1:chrVI_148977_T_C	0.059956	0.261071	-0.483374	-0.483374	TSS	YFR001W
LOC1:chrVI_148978_T_C	0.459546	0.730603	-0.207574	-0.207574	TSS	YFR001W
NIC96:chrVI_149865_T_A	0.277591	0.574312	-0.108501	-0.108501	TSS	YFR002W
RPN11:chrVI_153323_T_A	0.0633844	0.269428	-0.0673482	-0.0673482	TSS	YFR004W
RPN11:chrVI_153342_A_G	0.000100773	0.00294084	0.153857	0.153857	TSS	YFR004W
YFR006W:chrVI_155985_GTTTT_GT	0.283676	0.580179	0.265776	0.265776	TSS	YFR006W
YFH7:chrVI_159165_G_A	0.400567	0.733061	-0.115013	-0.115013	Upstream	YFR007W
FAR7:chrVI_160471_A_ATTAT	0.0767386	0.29669	0.324247	0.324247	TSS	YFR008W
UBP6:chrVI_164883_G_T	0.152559	0.427137	-0.108745	-0.108745	TSS	YFR010W
MIC19:chrVI_167366_C_T	0.0523462	0.259277	-0.172026	-0.172026	Upstream	YFR011C
MIC19:chrVI_167381_AAT_A	0.0541856	0.247474	-0.167054	-0.167054	TSS	YFR011C
MIC19:chrVI_167402_C_T	0.0298237	0.174427	-0.248986	-0.248986	TSS	YFR011C
MIC19:chrVI_167403_C_G	0.338403	0.637129	-0.0644883	-0.0644883	TSS	YFR011C
MIC19:chrVI_167410_A_G	0.38087	0.671667	-0.0748561	-0.0748561	TSS	YFR011C
CMK1:chrVI_174046_CTTT_C	0.19487	0.480551	0.131464	0.131464	TSS	YFR014C
GSY1:chrVI_176506_AG_A	0.936596	0.978664	0.00677927	0.00677927	TSS	YFR015C
GSY1:chrVI_176518_T_C	0.180841	0.464343	0.134057	0.134057	TSS	YFR015C
GSY1:chrVI_176548_G_A	0.494325	0.753907	0.0569639	0.0569639	TSS	YFR015C
GSY1:chrVI_176588_T_C	0.0134312	0.108994	-0.250922	-0.250922	TSS	YFR015C
YFR020W:chrVI_192485_T_C	0.0103782	0.0922798	0.117457	0.117457	TSS	YFR020W
YFR020W:chrVI_192522_GTTTCTATCGTGA_G	0.959899	0.989106	0.00204444	0.00204444	TSS	YFR020W
YFR020W:chrVI_192545_C_T	4.831e-05	0.00217396	-0.403659	-0.403659	Upstream	YFR020W
YFR020W:chrVI_192551_T_A	0.195522	0.481412	-0.0607932	-0.0607932	TSS	YFR020W
YFR020W:chrVI_192564_A_G	0.00987271	0.089981	-0.129158	-0.129158	TSS	YFR020W
YFR020W:chrVI_192590_A_G	0.110773	0.364416	-0.0709472	-0.0709472	TSS	YFR020W
HIS2:chrVI_204889_AG_A	0.952528	0.986326	-0.0173628	-0.0173628	TSS	YFR025C
HIS2:chrVI_204891_A_C	0.00528458	0.0587803	0.469244	0.469244	TSS	YFR025C
HIS2:chrVI_204894_G_T	0.610411	0.836437	-0.154143	-0.154143	TSS	YFR025C
HIS2:chrVI_204901_CAA_C	0.153944	0.429036	-0.233377	-0.233377	TSS	YFR025C
ECO1:chrVI_207357_G_C	0.0642014	0.270585	0.127603	0.127603	TSS	YFR027W
ECO1:chrVI_207374_G_C	0.000154203	0.00396615	0.226053	0.226053	TSS	YFR027W
RPL2A:chrVI_221528_C_G	0.631059	0.846459	0.0872958	0.0872958	TSS	YFR031C-A
PHO4:chrVI_226036_G_C	0.37393	0.665558	0.0628055	0.0628055	TSS	YFR034C
PHO4:chrVI_226131_CAAAA_CA	0.219721	0.511618	0.0953411	0.0953411	TSS	YFR034C
RSC8:chrVI_229320_G_A	0.0117425	0.100401	-0.527143	-0.527143	TSS	YFR037C
IRC5:chrVI_229337_G_A	0.000256377	0.00593972	-0.292571	-0.292571	TSS	YFR038W
IRC5:chrVI_229348_C_A	0.0440539	0.22173	0.123701	0.123701	TSS	YFR038W
RSC8:chrVI_229349_G_A	0.0328233	0.184821	-0.418209	-0.418209	TSS	YFR037C
OSW7:chrVI_233790_C_G	1.14262e-10	2.16742e-08	0.633837	0.633837	TSS	YFR039C
DUG1:chrVI_241524_C_CTT	0.274665	0.609708	-0.21888	-0.21888	Upstream	YFR044C
YFR045W:chrVI_241871_G_T	0.0250574	0.169156	0.355964	0.355964	Upstream	YFR045W
YFR045W:chrVI_241949_T_C	0.230051	0.522217	-0.201705	-0.201705	TSS	YFR045W
CNN1:chrVI_244301_A_T	0.374712	0.666228	-0.0786161	-0.0786161	TSS	YFR046C
RMD8:chrVI_245962_T_TA	0.973057	0.992589	-0.00297304	-0.00297304	TSS	YFR048W
PDE1:chrVII_35577_T_G	0.25281	0.552397	0.365111	0.365111	TSS	YGL248W
KAP114:chrVII_45345_T_A	0.625535	0.864146	-0.0443942	-0.0443942	Upstream	YGL241W
KAP114:chrVII_45371_C_T	0.00244696	0.0397735	-0.671832	-0.671832	Upstream	YGL241W
KAP114:chrVII_45399_G_A	4.64332e-06	0.000256227	0.602106	0.602106	TSS	YGL241W
CSE1:chrVII_49415_CT_C	0.647754	0.85216	-0.0327626	-0.0327626	TSS	YGL238W
MTO1:chrVII_55912_A_G	0.00469369	0.0641471	0.987766	0.987766	Upstream	YGL236C
MTO1:chrVII_55935_C_G	0.443937	0.759262	0.0880617	0.0880617	Upstream	YGL236C
MTO1:chrVII_56448_A_C	0.0407449	0.225917	0.265788	0.265788	Upstream	YGL236C
TAN1:chrVII_61936_C_T	0.716724	0.885535	0.0260192	0.0260192	TSS	YGL232W
SAP4:chrVII_67253_T_C	0.518704	0.804629	0.0695157	0.0695157	Upstream	YGL229C
OST5:chrVII_73286_A_G	0.0491265	0.233332	0.568443	0.568443	TSS	YGL226C-A
OST5:chrVII_73309_CAT_C	0.0129638	0.107097	0.775412	0.775412	TSS	YGL226C-A
EDC1:chrVII_81268_G_A	2.76378e-10	4.93416e-08	-0.566187	-0.566187	TSS	YGL222C
FRA2:chrVII_81306_T_A	0.447692	0.722426	-0.151523	-0.151523	TSS	YGL220W
EDC1:chrVII_81381_G_A	0.37204	0.664959	-0.0518103	-0.0518103	TSS	YGL222C
MDM34:chrVII_84285_GT_G	0.701213	0.882449	-0.0251877	-0.0251877	TSS	YGL219C
MDM34:chrVII_84308_T_C	0.221653	0.51273	-0.0876496	-0.0876496	TSS	YGL219C
MIG2:chrVII_95788_T_C	0.857964	0.942766	0.037514	0.037514	TSS	YGL209W
SPT16:chrVII_98756_A_C	0.0374926	0.215366	0.187894	0.187894	Upstream	YGL207W
SPT16:chrVII_98776_CTT_C	0.312134	0.606181	0.0718346	0.0718346	TSS	YGL207W
POX1:chrVII_107795_A_C	0.1027	0.349807	0.153067	0.153067	TSS	YGL205W
POX1:chrVII_107810_C_T	0.135519	0.40054	0.173976	0.173976	TSS	YGL205W
POX1:chrVII_107814_C_T	0.525538	0.776538	0.0681504	0.0681504	TSS	YGL205W
YGL204C:chrVII_112158_C_T	0.00355561	0.0519017	-0.397634	-0.397634	Upstream	YGL204C
YGL204C:chrVII_112175_C_A	0.0029589	0.0452853	0.471129	0.471129	Upstream	YGL204C
YGL204C:chrVII_112192_T_TA	0.135675	0.40054	-0.15737	-0.15737	TSS	YGL204C
YGL204C:chrVII_112250_C_T	0.209433	0.535138	-0.149446	-0.149446	Upstream	YGL204C
YGL204C:chrVII_112259_T_TA	0.476735	0.744285	-0.0742415	-0.0742415	TSS	YGL204C
KEX1:chrVII_114793_C_A	0.490803	0.790984	0.054618	0.054618	Upstream	YGL203C
ARO8:chrVII_115872_C_A	0.479316	0.745005	0.0381427	0.0381427	TSS	YGL202W
EMP24:chrVII_123533_C_T	0.674777	0.886674	-0.0455295	-0.0455295	Upstream	YGL200C
HOS2:chrVII_141849_G_T	0.174695	0.484915	-0.208057	-0.208057	Upstream	YGL194C
HOS2:chrVII_141864_A_G	0.614938	0.857995	-0.0409745	-0.0409745	Upstream	YGL194C
IME4:chrVII_142176_G_A	0.440223	0.716839	0.0400522	0.0400522	TSS	YGL192W
COX13:chrVII_144562_A_G	0.186854	0.472191	0.195561	0.195561	TSS	YGL191W
YGL185C:chrVII_154421_G_A	0.753535	0.90074	-0.0911443	-0.0911443	TSS	YGL185C
YGL176C:chrVII_173135_TC_T	0.891868	0.959184	-0.0164402	-0.0164402	TSS	YGL176C
BUD13:chrVII_174394_A_G	0.306976	0.603414	0.122749	0.122749	TSS	YGL174W
BUD13:chrVII_174507_A_G	0.581327	0.814556	0.0594294	0.0594294	TSS	YGL174W
ROK1:chrVII_182242_T_G	0.256945	0.557418	-0.155912	-0.155912	TSS	YGL171W
SUA5:chrVII_185905_C_T	0.0492785	0.252842	0.205557	0.205557	Upstream	YGL169W
SUA5:chrVII_185968_AT_A	0.619637	0.860191	0.0610013	0.0610013	Upstream	YGL169W
tK(CUU)G2:chrVII_185982_C_T	0.390626	0.721619	0.0565434	0.0565434	Upstream	tK(CUU)G2
AIM14:chrVII_200351_C_T	0.811251	0.926386	0.0181136	0.0181136	TSS	YGL160W
YGL159W:chrVII_202665_T_A	0.472769	0.741143	0.165857	0.165857	TSS	YGL159W
RCK1:chrVII_206511_A_G	0.028929	0.171167	0.231161	0.231161	TSS	YGL158W
RCK1:chrVII_206526_T_C	0.977208	0.993902	0.00351216	0.00351216	TSS	YGL158W
RCK1:chrVII_206532_A_T	0.145771	0.414605	0.164421	0.164421	TSS	YGL158W
RCK1:chrVII_206617_A_ATT	0.135845	0.426329	0.378084	0.378084	Upstream	YGL158W
ARI1:chrVII_208835_G_T	0.000119018	0.00337589	-0.302299	-0.302299	TSS	YGL157W
AMS1:chrVII_210314_C_T	0.211209	0.537832	-0.127515	-0.127515	Upstream	YGL156W
LYS5:chrVII_216137_T_A	0.0149253	0.126328	0.266291	0.266291	Upstream	YGL154C
LYS5:chrVII_216170_G_GA	0.362979	0.659271	-0.165767	-0.165767	TSS	YGL154C
LYS5:chrVII_216207_A_G	0.195579	0.481412	-0.212452	-0.212452	TSS	YGL154C
COQ8:chrVII_284360_A_G	0.00750119	0.0838071	0.231731	0.231731	Upstream	YGL119W
YGL108C:chrVII_304107_G_A	0.678555	0.869686	0.036942	0.036942	TSS	YGL108C
YGL108C:chrVII_304214_T_A	0.233371	0.525599	-0.130516	-0.130516	TSS	YGL108C
ARC1:chrVII_307361_C_A	0.0455195	0.225081	0.116804	0.116804	TSS	YGL105W
RPL28:chrVII_310899_G_A	0.418834	0.703076	-0.122352	-0.122352	TSS	YGL103W
SRM1:chrVII_321718_G_C	0.453749	0.724943	0.0546835	0.0546835	TSS	YGL097W
PAN2:chrVII_334704_T_C	0.24186	0.577389	-0.0955173	-0.0955173	Upstream	YGL094C
PAN2:chrVII_334766_GTTTT_G	0.768568	0.907728	-0.0345474	-0.0345474	TSS	YGL094C
SPC105:chrVII_334770_T_TAGAA	0.166568	0.448239	-0.262189	-0.262189	TSS	YGL093W
SCY1:chrVII_352895_GA_G	0.0128602	0.106641	0.143213	0.143213	TSS	YGL083W
SCY1:chrVII_352951_A_G	0.0769339	0.297067	-0.115774	-0.115774	TSS	YGL083W
YGL082W:chrVII_355706_C_T	0.451828	0.723258	0.0407208	0.0407208	TSS	YGL082W
DBP3:chrVII_361971_AT_A	0.174482	0.455869	0.275667	0.275667	TSS	YGL078C
DBP3:chrVII_362066_G_A	0.0596901	0.261037	0.468152	0.468152	TSS	YGL078C
HNM1:chrVII_364120_G_C	0.132028	0.395563	0.0802949	0.0802949	TSS	YGL077C
HNM1:chrVII_364146_ATT_AT	0.0289312	0.171167	0.118053	0.118053	TSS	YGL077C
MPS2:chrVII_368551_G_GA	0.275645	0.609708	0.102247	0.102247	Upstream	YGL075C
AFT1:chrVII_371489_T_G	0.182881	0.466728	-0.30547	-0.30547	TSS	YGL071W
PYC1:chrVII_385041_A_C	1.32203e-08	1.33746e-06	0.439455	0.439455	TSS	YGL062W
GEP7:chrVII_395869_G_A	0.301919	0.595402	0.222847	0.222847	TSS	YGL057C
GEP7:chrVII_395882_C_T	0.0717095	0.284481	0.423807	0.423807	TSS	YGL057C
GEP7:chrVII_395909_C_T	0.0540005	0.26083	-0.251282	-0.251282	Upstream	YGL057C
TIF4632:chrVII_409847_T_C	0.268377	0.603307	0.0972691	0.0972691	Upstream	YGL049C
TIF4632:chrVII_409886_C_G	0.653566	0.875227	-0.0547037	-0.0547037	Upstream	YGL049C
ALG13:chrVII_411461_A_G	0.737942	0.914295	-0.0373085	-0.0373085	Upstream	YGL047W
RIM8:chrVII_413965_AG_A	0.0986713	0.342265	0.597087	0.597087	TSS	YGL045W
CWH41:chrVII_446205_G_A	0.879506	0.951639	-0.0298734	-0.0298734	TSS	YGL027C
CWH41:chrVII_446235_A_T	0.539079	0.785456	-0.090806	-0.090806	TSS	YGL027C
STT3:chrVII_452296_A_C	0.25714	0.591038	-0.142508	-0.142508	Upstream	YGL022W
JAC1:chrVII_459752_C_CT	0.244037	0.540074	-0.104176	-0.104176	TSS	YGL018C
ATE1:chrVII_459753_GT_TT	0.0308639	0.177409	-0.183919	-0.183919	TSS	YGL017W
ATE1:chrVII_459766_C_T	9.13295e-05	0.00277185	0.425406	0.425406	TSS	YGL017W
ATE1:chrVII_459767_T_C	0.0761084	0.295382	0.147615	0.147615	TSS	YGL017W
PUF4:chrVII_465593_GT_G	0.141402	0.408805	-0.548506	-0.548506	TSS	YGL014W
PDR1:chrVII_472372_C_A	0.0435701	0.233471	-0.384882	-0.384882	Upstream	YGL013C
MPO1:chrVII_475388_T_C	0.53572	0.784574	-0.0184925	-0.0184925	TSS	YGL010W
MPO1:chrVII_475390_A_T	3.26765e-07	2.60982e-05	0.304817	0.304817	TSS	YGL010W
MPO1:chrVII_475414_A_G	0.00013101	0.00364244	-0.17132	-0.17132	TSS	YGL010W
YGL007C-A:chrVII_484095_CTTT_C	0.109968	0.363308	-0.153445	-0.153445	TSS	YGL007C-A
BRP1:chrVII_483131_TAA_TA	0.637511	0.870153	-0.0634176	-0.0634176	Upstream	YGL007W
COG7:chrVII_490647_G_A	0.384471	0.674045	0.0562726	0.0562726	TSS	YGL005C
RPN14:chrVII_492059_C_A	0.990358	0.996266	0.00136484	0.00136484	TSS	YGL004C
ERG26:chrVII_496647_C_T	0.22183	0.51273	-0.329585	-0.329585	TSS	YGL001C
SWC4:chrVII_500059_T_G	0.911188	0.971398	0.00873516	0.00873516	Upstream	YGR002C
PEX31:chrVII_502807_C_T	0.580637	0.838075	0.168575	0.168575	Upstream	YGR004W
TFG2:chrVII_506019_C_T	0.986306	0.994915	0.00139677	0.00139677	TSS	YGR005C
SNU71:chrVII_514414_T_C	0.954792	0.987323	-0.00299224	-0.00299224	TSS	YGR013W
SNU71:chrVII_514497_A_G	0.975737	0.993746	-0.00169599	-0.00169599	TSS	YGR013W
SNU71:chrVII_514511_C_T	0.134088	0.398588	-0.0872715	-0.0872715	TSS	YGR013W
MSB2:chrVII_516638_C_T	0.0344865	0.205394	-0.356485	-0.356485	Upstream	YGR014W
YGR016W:chrVII_522131_C_T	0.404085	0.692182	-0.0589463	-0.0589463	TSS	YGR016W
YGR018C:chrVII_524803_T_C	0.387439	0.676075	-0.129587	-0.129587	TSS	YGR018C
RPS25A:chrVII_534871_C_T	0.110767	0.364416	-0.0768067	-0.0768067	TSS	YGR027C
RPS25A:chrVII_534914_A_G	0.950532	0.982497	0.00519336	0.00519336	Upstream	YGR027C
POP6:chrVII_546200_C_CTT	0.966489	0.991983	-0.00278724	-0.00278724	TSS	YGR030C
POP6:chrVII_546202_C_CCAAACAATCT	0.0722112	0.28564	0.103994	0.103994	TSS	YGR030C
IMO32:chrVII_546367_G_A	0.37806	0.670185	0.0952327	0.0952327	TSS	YGR031W
TIM21:chrVII_555047_C_T	0.571312	0.807611	0.0782822	0.0782822	TSS	YGR033C
TIM21:chrVII_555048_C_T	0.150591	0.424634	0.209873	0.209873	TSS	YGR033C
TIM21:chrVII_555111_C_T	0.41594	0.700649	0.143227	0.143227	TSS	YGR033C
ACB1:chrVII_560083_G_A	0.00431102	0.0519204	0.218204	0.218204	TSS	YGR037C
ORM1:chrVII_560412_CA_C	0.000921469	0.0168508	0.206165	0.206165	TSS	YGR038W
ORM1:chrVII_560467_A_AAG	0.189327	0.474005	0.0829254	0.0829254	TSS	YGR038W
ORM1:chrVII_560495_C_T	0.00209356	0.0313969	-0.187572	-0.187572	TSS	YGR038W
TAM41:chrVII_584683_C_G	0.0707286	0.283397	0.131309	0.131309	TSS	YGR046W
TFC4:chrVII_589637_A_G	0.00270432	0.0379349	0.207467	0.207467	TSS	YGR047C
MUP1:chrVII_599246_T_C	6.59492e-05	0.00224894	0.305246	0.305246	TSS	YGR055W
MUP1:chrVII_599286_C_T	0.106083	0.356146	-0.158506	-0.158506	TSS	YGR055W
MUP1:chrVII_599356_A_C	0.524119	0.775196	-0.0435816	-0.0435816	TSS	YGR055W
MUP1:chrVII_599373_T_G	0.895153	0.961969	0.00913556	0.00913556	TSS	YGR055W
SPT4:chrVII_617977_T_G	0.627764	0.845637	-0.0250398	-0.0250398	TSS	YGR063C
MRPL25:chrVII_637679_A_AT	0.937721	0.981038	0.00640579	0.00640579	Upstream	YGR076C
RPL11B:chrVII_648978_T_C	0.158014	0.43479	0.0698176	0.0698176	TSS	YGR085C
RPL11B:chrVII_649033_A_C	0.350104	0.647511	0.0446646	0.0446646	TSS	YGR085C
MDR1:chrVII_690131_C_T	0.0893664	0.321058	-0.0721498	-0.0721498	TSS	YGR100W
RPS23A:chrVII_726885_A_G	0.507447	0.798514	-0.0519312	-0.0519312	Upstream	YGR118W
COG2:chrVII_730940_G_A	0.0230827	0.160931	0.261008	0.261008	Upstream	YGR120C
ECL1:chrVII_785199_C_T	0.56005	0.802906	-0.0856498	-0.0856498	TSS	YGR146C
NAT2:chrVII_787089_C_T	0.30898	0.603733	0.174404	0.174404	TSS	YGR147C
YGR149W:chrVII_788249_A_T	0.331873	0.668818	-0.168073	-0.168073	Upstream	YGR149W
YGR153W:chrVII_795956_T_C	0.272394	0.572376	-0.176433	-0.176433	TSS	YGR153W
GTO1:chrVII_798183_C_A	0.067051	0.277111	-0.28633	-0.28633	TSS	YGR154C
GTO1:chrVII_798196_A_G	0.00525472	0.0587803	-0.443559	-0.443559	TSS	YGR154C
CHO2:chrVII_802060_G_T	0.202835	0.490637	0.180009	0.180009	TSS	YGR157W
NSR1:chrVII_807712_G_A	0.00530069	0.0587803	0.237223	0.237223	TSS	YGR159C
NSR1:chrVII_807765_G_T	0.00489091	0.056227	0.264801	0.264801	TSS	YGR159C
RTS3:chrVII_809640_G_T	0.903039	0.963814	0.010366	0.010366	TSS	YGR161C
YIP1:chrVII_843675_T_C	0.0824179	0.30758	0.201176	0.201176	TSS	YGR172C
PBP1:chrVII_853535_A_G	0.268009	0.602784	0.124276	0.124276	Upstream	YGR178C
RNR4:chrVII_856430_CA_CAA	0.0325752	0.200521	0.257546	0.257546	Upstream	YGR180C
TIM13:chrVII_858110_C_T	0.0463102	0.243769	0.180895	0.180895	Upstream	YGR181W
tL(CAA)G3:chrVII_858225_G_T	0.466174	0.776204	0.0898365	0.0898365	Upstream	tL(CAA)G3
QCR9:chrVII_859580_T_C	0.00944526	0.0953749	0.381859	0.381859	Upstream	YGR183C
QCR9:chrVII_859584_C_T	0.299728	0.592621	-0.0848962	-0.0848962	TSS	YGR183C
TFG1:chrVII_867732_G_A	0.231869	0.524	-0.0766873	-0.0766873	TSS	YGR186W
HGH1:chrVII_871517_T_C	0.568268	0.806352	0.0615197	0.0615197	TSS	YGR187C
BUB1:chrVII_875186_T_C	0.0428	0.220969	0.384484	0.384484	TSS	YGR188C
BUB1:chrVII_875292_C_T	0.254363	0.553722	-0.207305	-0.207305	TSS	YGR188C
CRH1:chrVII_878256_G_A	0.141608	0.408926	0.23013	0.23013	TSS	YGR189C
CRH1:chrVII_878298_G_A	0.0141914	0.113345	0.340848	0.340848	TSS	YGR189C
TDH3:chrVII_883964_G_A	0.105905	0.374141	-0.394392	-0.394392	Upstream	YGR192C
PDX1:chrVII_885870_T_A	0.944007	0.981349	-0.00494113	-0.00494113	Upstream	YGR193C
XKS1:chrVII_888361_A_T	0.000309826	0.00691413	0.433565	0.433565	TSS	YGR194C
XKS1:chrVII_888397_G_A	0.915646	0.968031	-0.0136803	-0.0136803	TSS	YGR194C
XKS1:chrVII_888438_TAA_T	1.02208e-05	0.000500323	-0.505902	-0.505902	TSS	YGR194C
SNG1:chrVII_894371_G_A	0.503285	0.759558	-0.0431285	-0.0431285	TSS	YGR197C
SNG1:chrVII_894432_C_T	0.804573	0.923868	-0.0178503	-0.0178503	TSS	YGR197C
SNG1:chrVII_894461_G_GAA	0.00242601	0.0349563	0.219221	0.219221	TSS	YGR197C
ELP2:chrVII_902358_C_T	0.168469	0.450884	0.181608	0.181608	TSS	YGR200C
ELP2:chrVII_902387_A_G	0.332972	0.631413	0.102485	0.102485	TSS	YGR200C
YCH1:chrVII_905164_T_TA	0.00648286	0.0768901	-0.304382	-0.304382	Upstream	YGR203W
MVB12:chrVII_910292_T_C	0.474736	0.742693	-0.145042	-0.145042	TSS	YGR206W
MVB12:chrVII_910327_C_T	0.232624	0.524527	-0.252321	-0.252321	TSS	YGR206W
MVB12:chrVII_910338_T_C	0.219613	0.511618	-0.213293	-0.213293	TSS	YGR206W
CIR1:chrVII_911822_A_G	0.273443	0.609484	-0.126398	-0.126398	Upstream	YGR207C
TRX2:chrVII_913309_G_A	0.114336	0.369773	0.176194	0.176194	TSS	YGR209C
SLI1:chrVII_916953_T_C	0.26449	0.563318	0.197812	0.197812	TSS	YGR212W
SLI1:chrVII_917004_C_T	0.925305	0.973414	-0.0153527	-0.0153527	TSS	YGR212W
RTA1:chrVII_919513_G_A	0.185326	0.469502	0.201616	0.201616	TSS	YGR213C
RTA1:chrVII_919531_G_A	0.450291	0.722815	0.123496	0.123496	TSS	YGR213C
RTA1:chrVII_919561_A_T	0.79945	0.92011	-0.0376676	-0.0376676	TSS	YGR213C
TOS2:chrVII_939128_G_A	0.53884	0.785456	-0.0672179	-0.0672179	TSS	YGR221C
HSV2:chrVII_942366_C_T	1.51152e-06	9.76054e-05	0.461186	0.461186	TSS	YGR223C
AZR1:chrVII_942635_C_T	0.648482	0.852379	0.0682712	0.0682712	TSS	YGR224W
AMA1:chrVII_944981_T_A	0.0273399	0.168529	0.258863	0.258863	TSS	YGR225W
SMI1:chrVII_951285_GA_GAA	0.56517	0.806352	0.0524005	0.0524005	TSS	YGR229C
BNS1:chrVII_951726_C_G	0.000134329	0.00367288	0.311016	0.311016	TSS	YGR230W
BNS1:chrVII_951733_A_T	0.000118491	0.00337589	0.36229	0.36229	TSS	YGR230W
BNS1:chrVII_951823_TGA_TAGA	0.863051	0.944254	0.0154027	0.0154027	TSS	YGR230W
BNS1:chrVII_951825_A_T	0.0216401	0.149267	0.228324	0.228324	TSS	YGR230W
NAS6:chrVII_953861_G_A	0.823596	0.942065	0.0534659	0.0534659	Upstream	YGR232W
NAS6:chrVII_953935_T_C	0.369261	0.662559	-0.198734	-0.198734	TSS	YGR232W
PHO81:chrVII_958479_A_G	0.0462652	0.243769	0.257141	0.257141	Upstream	YGR233C
PHO81:chrVII_958516_T_C	0.0243753	0.166283	0.231591	0.231591	Upstream	YGR233C
MIC26:chrVII_962129_A_T	0.000629903	0.0120265	0.235329	0.235329	TSS	YGR235C
KEL2:chrVII_968722_ATTT_ATTTT	0.0473421	0.228069	-0.263761	-0.263761	TSS	YGR238C
LSC2:chrVII_979545_A_G	0.0288757	0.171167	0.125021	0.125021	TSS	YGR244C
SDA1:chrVII_982259_G_GA	0.70943	0.882788	0.0630252	0.0630252	TSS	YGR245C
BRF1:chrVII_984317_G_A	0.593246	0.824784	-0.0713	-0.0713	TSS	YGR246C
BRF1:chrVII_984347_AT_A	0.369116	0.662559	-0.0957215	-0.0957215	TSS	YGR246C
BRF1:chrVII_984362_C_T	0.53533	0.784513	-0.0835436	-0.0835436	TSS	YGR246C
SOL4:chrVII_985817_G_A	0.410509	0.738261	-0.165072	-0.165072	Upstream	YGR248W
SOL4:chrVII_985834_T_A	0.990009	0.996472	-0.00238238	-0.00238238	Upstream	YGR248W
SOL4:chrVII_985898_A_G	0.196741	0.519642	0.129752	0.129752	Upstream	YGR248W
YGR250C:chrVII_993818_A_ATGTT	0.573148	0.833788	-0.103185	-0.103185	Upstream	YGR250C
GCN5:chrVII_996699_GT_G	0.994706	0.997005	0.000807569	0.000807569	TSS	YGR252W
PUP2:chrVII_999313_A_G	0.761216	0.922329	-0.0264496	-0.0264496	Upstream	YGR253C
COQ6:chrVII_1004073_C_T	0.185547	0.469671	0.108508	0.108508	TSS	YGR255C
COQ6:chrVII_1004074_C_T	0.810796	0.926386	-0.013804	-0.013804	TSS	YGR255C
COQ6:chrVII_1004159_C_T	0.632118	0.84679	0.0342701	0.0342701	TSS	YGR255C
COQ6:chrVII_1004169_C_A	0.528524	0.778298	0.0399591	0.0399591	TSS	YGR255C
COQ6:chrVII_1004183_C_G	0.271975	0.572376	-0.0823505	-0.0823505	TSS	YGR255C
MTM1:chrVII_1007547_C_A	0.369043	0.662559	-0.0466266	-0.0466266	TSS	YGR257C
CAB4:chrVII_1046581_G_T	1.99593e-16	1.21153e-13	-1.05088	-1.05088	TSS	YGR277C
SCW4:chrVII_1050080_G_A	0.283766	0.619003	0.143825	0.143825	Upstream	YGR279C
SCW4:chrVII_1050159_A_C	0.00265841	0.0421572	0.370675	0.370675	Upstream	YGR279C
SCW4:chrVII_1050164_A_C	0.151281	0.449961	-0.146056	-0.146056	Upstream	YGR279C
PXR1:chrVII_1051846_CTT_TTT	0.0514532	0.258074	-0.516289	-0.516289	Upstream	YGR280C
PXR1:chrVII_1051848_T_TTTTTTTTC	0.000472691	0.011671	0.784509	0.784509	Upstream	YGR280C
PXR1:chrVII_1051850_G_A	0.844978	0.950251	0.0280245	0.0280245	Upstream	YGR280C
PXR1:chrVII_1052548_A_G	0.112301	0.38665	0.342033	0.342033	Upstream	YGR280C
YGR283C:chrVII_1060130_A_C	0.189143	0.474005	0.102646	0.102646	TSS	YGR283C
BIO2:chrVII_1065116_A_C	0.004763	0.0551745	-0.365244	-0.365244	TSS	YGR286C
BIO2:chrVII_1065185_T_C	3.82643e-07	9.00016e-05	0.610793	0.610793	Upstream	YGR286C
IMA1:chrVII_1069265_A_G	0.142714	0.410946	0.136102	0.136102	TSS	YGR287C
MAL13:chrVII_1070200_T_C	0.0151408	0.117826	0.185393	0.185393	TSS	YGR288W
MUP3:chrVIII_26177_C_T	0.729051	0.889387	-0.0348541	-0.0348541	TSS	YHL036W
MUP3:chrVIII_26179_T_C	0.606042	0.833411	-0.04404	-0.04404	TSS	YHL036W
OCA5:chrVIII_48099_GAA_GAAA	0.41974	0.703198	0.102173	0.102173	TSS	YHL029C
RIM101:chrVIII_50901_A_AC	0.247709	0.584443	-0.0884899	-0.0884899	Upstream	YHL027W
YHL026C:chrVIII_54245_A_G	0.0305486	0.177044	0.213608	0.213608	TSS	YHL026C
YHL026C:chrVIII_54302_C_T	0.59439	0.825899	0.0575728	0.0575728	TSS	YHL026C
NPR3:chrVIII_62601_CTT_CT	0.645643	0.851597	-0.0316274	-0.0316274	TSS	YHL023C
NPR3:chrVIII_62702_G_A	0.115744	0.370791	0.158645	0.158645	TSS	YHL023C
NPR3:chrVIII_62711_A_C	0.0670296	0.277111	0.172806	0.172806	TSS	YHL023C
AIM17:chrVIII_65979_A_G	0.604593	0.853353	-0.0515599	-0.0515599	Upstream	YHL021C
OPI1:chrVIII_67586_C_CTCTT	0.000193619	0.00473897	0.391336	0.391336	TSS	YHL020C
OPI1:chrVIII_67629_G_T	0.58955	0.84122	-0.0652591	-0.0652591	Upstream	YHL020C
ETP1:chrVIII_83838_T_C	0.267583	0.602432	0.171992	0.171992	Upstream	YHL010C
YAP3:chrVIII_85273_GAAAAAAA_GAAAA	0.567984	0.830941	-0.07751	-0.07751	Upstream	YHL009C
YHL006W-A:chrVIII_97536_T_C	0.527177	0.777845	0.0787423	0.0787423	TSS	YHL006W-A
YHL006W-A:chrVIII_97599_A_G	0.110757	0.364416	0.233027	0.233027	TSS	YHL006W-A
YHL006W-A:chrVIII_97611_G_T	0.906912	0.964526	0.0163437	0.0163437	TSS	YHL006W-A
MRP4:chrVIII_99089_G_A	0.140645	0.434979	0.178455	0.178455	Upstream	YHL004W
LAG1:chrVIII_102030_A_G	0.946008	0.982046	0.00763426	0.00763426	Upstream	YHL003C
LAG1:chrVIII_102150_C_A	0.905232	0.969675	0.0194476	0.0194476	Upstream	YHL003C
RPL14B:chrVIII_104146_C_T	0.92092	0.970374	-0.00774716	-0.00774716	TSS	YHL001W
LEU5:chrVIII_108568_G_A	0.396908	0.688263	-0.3035	-0.3035	TSS	YHR002W
GPA1:chrVIII_115080_T_A	0.691358	0.876837	-0.0342548	-0.0342548	TSS	YHR005C
TIM10:chrVIII_115977_A_T	0.0763515	0.295947	0.184383	0.184383	TSS	YHR005C-A
TDA3:chrVIII_125937_T_C	0.924428	0.976891	-0.0128285	-0.0128285	Upstream	YHR009C
DIA4:chrVIII_127630_CA_C	0.188819	0.474005	-0.0495199	-0.0495199	TSS	YHR011W
DIA4:chrVIII_127727_C_G	0.568258	0.806352	0.0189557	0.0189557	TSS	YHR011W
DIA4:chrVIII_127758_C_T	0.592915	0.824784	0.0183414	0.0183414	TSS	YHR011W
DIA4:chrVIII_127766_G_C	0.11691	0.372321	0.0561223	0.0561223	TSS	YHR011W
ARD1:chrVIII_131505_T_A	0.727477	0.889275	-0.0165697	-0.0165697	TSS	YHR013C
ARD1:chrVIII_131549_G_T	0.47968	0.745005	0.0393714	0.0393714	TSS	YHR013C
ARD1:chrVIII_131553_C_CT	0.0189243	0.13675	0.123636	0.123636	TSS	YHR013C
YSC83:chrVIII_138557_A_AG	0.0425934	0.220599	0.190103	0.190103	TSS	YHR017W
YSC83:chrVIII_138587_T_C	0.119742	0.375043	0.136295	0.136295	TSS	YHR017W
YHR022C:chrVIII_150421_T_C	0.145951	0.414605	0.285732	0.285732	TSS	YHR022C
YHR022C:chrVIII_150444_T_C	0.0946782	0.332964	0.267683	0.267683	TSS	YHR022C
YHR022C:chrVIII_150470_A_G	0.180146	0.464127	0.212406	0.212406	TSS	YHR022C
YHR022C:chrVIII_150476_C_T	0.47658	0.744285	0.13539	0.13539	TSS	YHR022C
YHR022C:chrVIII_150538_CAA_C	0.400356	0.691386	0.339694	0.339694	TSS	YHR022C
YHR022C-A:chrVIII_151383_GA_GAAA	0.347627	0.682389	0.0711827	0.0711827	Upstream	YHR022C-A
YHR022C-A:chrVIII_151416_T_C	0.620775	0.841112	-0.0325227	-0.0325227	TSS	YHR022C-A
MAS2:chrVIII_159238_T_G	0.619585	0.860191	0.0748583	0.0748583	Upstream	YHR024C
VMA16:chrVIII_160596_T_C	0.686054	0.873762	-0.0288934	-0.0288934	TSS	YHR026W
DAP2:chrVIII_167453_G_A	0.0847578	0.311052	0.575429	0.575429	TSS	YHR028C
DAP2:chrVIII_167512_C_T	0.204458	0.493185	0.62443	0.62443	TSS	YHR028C
DAP2:chrVIII_167543_T_C	0.785854	0.93075	-0.0188738	-0.0188738	Upstream	YHR028C
DAP2:chrVIII_167557_T_A	0.954301	0.983296	-0.00442464	-0.00442464	Upstream	YHR028C
DAP2:chrVIII_167558_CA_C	0.379221	0.710821	0.0577748	0.0577748	Upstream	YHR028C
DAP2:chrVIII_167575_G_T	0.0695949	0.282003	0.71699	0.71699	TSS	YHR028C
SLT2:chrVIII_170595_C_T	0.0133641	0.108994	0.47804	0.47804	TSS	YHR030C
SLT2:chrVIII_170619_T_TAAAA	0.364818	0.661423	0.282493	0.282493	TSS	YHR030C
SLT2:chrVIII_170680_T_C	0.000250486	0.00584789	0.77887	0.77887	TSS	YHR030C
YHR032W-A:chrVIII_175012_C_T	0.714425	0.884612	0.0394287	0.0394287	TSS	YHR032W-A
YHR032W-A:chrVIII_175141_T_C	0.124406	0.382544	-0.190376	-0.190376	TSS	YHR032W-A
YHR032C-A:chrVIII_175480_C_T	0.136246	0.426987	0.135023	0.135023	Upstream	YHR032C-A
NEL1:chrVIII_178041_G_T	0.04849	0.231863	-0.253627	-0.253627	TSS	YHR035W
NEL1:chrVIII_178104_C_T	0.81996	0.93031	-0.0345325	-0.0345325	TSS	YHR035W
PIH1:chrVIII_178121_G_A	0.0284969	0.170925	0.434078	0.434078	TSS	YHR034C
PIH1:chrVIII_178125_A_G	0.214694	0.505967	-0.233218	-0.233218	TSS	YHR034C
PIH1:chrVIII_178134_C_T	0.29636	0.590192	0.152685	0.152685	TSS	YHR034C
BRL1:chrVIII_180100_G_A	0.142603	0.410946	-0.097929	-0.097929	TSS	YHR036W
PUT2:chrVIII_181842_G_A	0.729093	0.889387	0.0247528	0.0247528	TSS	YHR037W
RRF1:chrVIII_183913_C_G	0.420958	0.703529	-0.0488637	-0.0488637	TSS	YHR038W
RRF1:chrVIII_183923_T_C	0.25827	0.558208	-0.0717376	-0.0717376	TSS	YHR038W
RRF1:chrVIII_183971_A_AG	0.394574	0.685563	-0.0522927	-0.0522927	TSS	YHR038W
RRF1:chrVIII_184025_T_C	0.26181	0.560138	-0.0720297	-0.0720297	TSS	YHR038W
MSC7:chrVIII_186921_G_A	0.24469	0.540097	-0.25788	-0.25788	TSS	YHR039C
MSC7:chrVIII_187029_GAAAAA_GA	0.0397181	0.211111	-0.491794	-0.491794	TSS	YHR039C
VMA10:chrVIII_187717_GA_G	0.150693	0.424634	0.311293	0.311293	TSS	YHR039C-A
BCD1:chrVIII_187814_G_GAAA	0.049591	0.253282	-0.233795	-0.233795	Upstream	YHR040W
BCD1:chrVIII_187898_AG_A	0.742592	0.895433	-0.0627379	-0.0627379	TSS	YHR040W
INM1:chrVIII_198394_G_C	0.0400635	0.212466	0.641064	0.641064	TSS	YHR046C
CIC1:chrVIII_210710_A_T	0.790212	0.917129	-0.0594076	-0.0594076	TSS	YHR052W
CPR2:chrVIII_218986_C_T	0.52612	0.807259	-0.0481561	-0.0481561	Upstream	YHR057C
MED6:chrVIII_219934_T_C	0.65045	0.852763	-0.0592701	-0.0592701	TSS	YHR058C
MED6:chrVIII_220015_T_C	0.565395	0.830865	-0.0845774	-0.0845774	Upstream	YHR058C
RPP1:chrVIII_223914_G_A	0.0268727	0.168127	-0.2821	-0.2821	TSS	YHR062C
SSZ1:chrVIII_227216_T_C	0.0538523	0.247474	-0.156789	-0.156789	TSS	YHR064C
SSZ1:chrVIII_227218_G_A	0.615467	0.839148	-0.030221	-0.030221	TSS	YHR064C
SSZ1:chrVIII_227221_G_A	0.00119307	0.0202288	-0.242314	-0.242314	TSS	YHR064C
SSZ1:chrVIII_227226_G_C	0.596394	0.82651	0.0331118	0.0331118	TSS	YHR064C
HXT1:chrVIII_292722_A_G	0.779008	0.913558	0.0352662	0.0352662	TSS	YHR094C
GRE3:chrVIII_323234_GAA_GA	0.53423	0.809863	0.0752967	0.0752967	Upstream	YHR104W
APE4:chrVIII_336196_ATACT_A	0.00576444	0.0627875	0.183762	0.183762	TSS	YHR113W
SPL2:chrVIII_375406_GAA_GA	0.457046	0.728155	-0.0648123	-0.0648123	TSS	YHR136C
YHR140W:chrVIII_380512_T_C	0.117823	0.37366	0.117093	0.117093	TSS	YHR140W
RPL42B:chrVIII_382788_T_C	0.257742	0.557984	-0.134851	-0.134851	TSS	YHR141C
RPL42B:chrVIII_382878_T_C	0.0118311	0.100581	-0.349286	-0.349286	TSS	YHR141C
CHS7:chrVIII_383265_A_G	0.196831	0.482149	0.0498449	0.0498449	TSS	YHR142W
CHS7:chrVIII_383266_G_T	0.423676	0.704965	-0.0323381	-0.0323381	TSS	YHR142W
DSE2:chrVIII_385186_C_T	0.114571	0.369773	0.132565	0.132565	TSS	YHR143W
RPC10:chrVIII_387076_T_G	0.0255338	0.17108	0.426234	0.426234	Upstream	YHR143W-A
RPC10:chrVIII_387077_T_A	0.753029	0.91998	0.0791412	0.0791412	Upstream	YHR143W-A
DCD1:chrVIII_388791_C_A	0.769997	0.908255	0.0437728	0.0437728	TSS	YHR144C
CRP1:chrVIII_390139_A_C	0.499296	0.755792	-0.0551119	-0.0551119	TSS	YHR146W
CRP1:chrVIII_390246_A_C	0.00443056	0.0527323	-0.296098	-0.296098	TSS	YHR146W
MRPL6:chrVIII_393466_A_T	0.259302	0.593051	-0.0927019	-0.0927019	Upstream	YHR147C
SPO16:chrVIII_402810_G_A	0.41093	0.697824	0.0684494	0.0684494	TSS	YHR153C
RTT107:chrVIII_402916_G_A	0.0860613	0.313561	0.170719	0.170719	TSS	YHR154W
YAP1801:chrVIII_422538_G_A	0.152177	0.427137	-0.0851599	-0.0851599	TSS	YHR161C
MPC2:chrVIII_422853_G_T	0.131546	0.417824	0.134367	0.134367	Upstream	YHR162W
CDC23:chrVIII_439232_A_G	0.200115	0.48711	0.0923282	0.0923282	TSS	YHR166C
DBP8:chrVIII_442027_GA_G	0.369023	0.662559	0.114215	0.114215	TSS	YHR169W
NMD3:chrVIII_443664_G_A	0.742507	0.895433	-0.0242658	-0.0242658	TSS	YHR170W
ATG7:chrVIII_445658_C_T	0.0646483	0.271005	-0.133817	-0.133817	TSS	YHR171W
GPI16:chrVIII_483978_A_G	0.027051	0.178305	0.341702	0.341702	Upstream	YHR188C
EGD2:chrVIII_488371_CA_C	0.340862	0.639286	0.0899346	0.0899346	TSS	YHR193C
PPX1:chrVIII_501189_A_G	0.0940318	0.331459	0.0939512	0.0939512	TSS	YHR201C
SKN7:chrVIII_512211_GA_G	0.725995	0.888556	-0.0415962	-0.0415962	TSS	YHR206W
BAT1:chrVIII_517419_G_A	0.28503	0.61993	0.0762986	0.0762986	Upstream	YHR208W
CRG1:chrVIII_519269_T_C	0.0533327	0.246369	-0.151753	-0.151753	TSS	YHR209W
CRG1:chrVIII_519381_C_G	0.0684668	0.279562	-0.142634	-0.142634	TSS	YHR209W
YIL166C:chrIX_33008_C_T	0.696942	0.879322	-0.0620037	-0.0620037	TSS	YIL166C
YIL166C:chrIX_33018_C_G	0.450861	0.722815	0.0989206	0.0989206	TSS	YIL166C
YIL166C:chrIX_33032_G_A	0.542083	0.787273	0.0856452	0.0856452	TSS	YIL166C
YIL166C:chrIX_33054_G_GAA	0.685391	0.873762	-0.0588965	-0.0588965	TSS	YIL166C
SUC2:chrIX_37299_CTT_CT	0.436669	0.714057	0.216459	0.216459	TSS	YIL162W
YIL161W:chrIX_39286_A_C	0.543662	0.787596	-0.0342191	-0.0342191	TSS	YIL161W
YIL161W:chrIX_39289_T_C	0.05921	0.259685	-0.0974471	-0.0974471	TSS	YIL161W
YIL161W:chrIX_39328_G_A	0.00418974	0.0516433	-0.169262	-0.169262	TSS	YIL161W
YIL161W:chrIX_39373_TAAA_TAA,TAAAA	0.917317	0.968031	0.00543603	0.00543603	TSS	YIL161W
YIL161W:chrIX_39386_C_T	0.97362	0.992589	-0.00179797	-0.00179797	TSS	YIL161W
YIL161W:chrIX_39393_T_G	0.0128267	0.106641	-0.164375	-0.164375	TSS	YIL161W
YIL161W:chrIX_39412_CA_C	0.153286	0.428381	-0.0854784	-0.0854784	TSS	YIL161W
POT1:chrIX_41532_A_G	0.172669	0.454268	0.276766	0.276766	TSS	YIL160C
BNR1:chrIX_41668_A_C	0.74357	0.89553	0.0376538	0.0376538	TSS	YIL159W
AIM20:chrIX_46057_C_G	0.192236	0.512651	0.0838781	0.0838781	Upstream	YIL158W
AIM20:chrIX_46102_C_A	0.97753	0.991568	-0.00203563	-0.00203563	Upstream	YIL158W
GUT2:chrIX_53815_C_T	0.052603	0.259277	0.280442	0.280442	Upstream	YIL155C
RRD1:chrIX_55071_C_A	0.808637	0.925419	0.0382712	0.0382712	TSS	YIL153W
MCM10:chrIX_62815_A_G	0.904548	0.963814	-0.0138369	-0.0138369	TSS	YIL150C
PAN6:chrIX_77331_G_A	0.974029	0.992672	0.00187793	0.00187793	TSS	YIL145C
PAN6:chrIX_77427_A_T	0.010429	0.0922798	-0.144025	-0.144025	TSS	YIL145C
TMA108:chrIX_92857_C_T	0.323723	0.662117	-0.0906545	-0.0906545	Upstream	YIL137C
TMA108:chrIX_92947_G_A	0.00108406	0.0190799	0.291809	0.291809	TSS	YIL137C
TMA108:chrIX_92948_A_T	0.771402	0.925346	0.0361078	0.0361078	Upstream	YIL137C
OM45:chrIX_93577_T_C	0.0210185	0.146984	-0.25475	-0.25475	TSS	YIL136W
FLX1:chrIX_97282_GAA_G	0.0129858	0.107097	-0.325418	-0.325418	TSS	YIL134W
CSM2:chrIX_100530_AT_A	0.403536	0.692182	-0.191123	-0.191123	TSS	YIL132C
CSM2:chrIX_100595_A_G	0.0685318	0.279562	-0.484137	-0.484137	TSS	YIL132C
CSM2:chrIX_100618_AG_A	0.843953	0.940441	0.065322	0.065322	TSS	YIL132C
FKH1:chrIX_102310_C_T	0.130365	0.393298	0.0778112	0.0778112	TSS	YIL131C
STH1:chrIX_117852_C_T	0.38328	0.674008	0.0254455	0.0254455	TSS	YIL126W
KGD1:chrIX_122282_G_T	0.80601	0.92396	0.0138702	0.0138702	TSS	YIL125W
AYR1:chrIX_126162_AAT_A	0.483426	0.746822	-0.03665	-0.03665	TSS	YIL124W
POG1:chrIX_130259_T_C	0.338895	0.637265	0.181384	0.181384	TSS	YIL122W
POG1:chrIX_130270_T_C	0.144816	0.414605	0.205911	0.205911	TSS	YIL122W
POG1:chrIX_130294_AT_A	0.0824942	0.30758	0.248317	0.248317	TSS	YIL122W
QDR2:chrIX_132151_T_A	0.261719	0.560138	-0.244437	-0.244437	TSS	YIL121W
NUP159:chrIX_148906_AT_A	0.616956	0.859316	-0.057926	-0.057926	Upstream	YIL115C
POR2:chrIX_150052_G_C	0.556152	0.799584	-0.0553025	-0.0553025	TSS	YIL114C
HOS4:chrIX_151474_A_AT	0.0760641	0.295382	0.134067	0.134067	TSS	YIL112W
HOS4:chrIX_151501_GT_G	0.566199	0.806352	0.0357898	0.0357898	TSS	YIL112W
HOS4:chrIX_151503_A_C	0.901835	0.963814	0.00776467	0.00776467	TSS	YIL112W
SHQ1:chrIX_171609_C_T	0.0230989	0.154416	-0.180616	-0.180616	TSS	YIL104C
SHQ1:chrIX_171637_GA_G	0.126256	0.385501	-0.145733	-0.145733	TSS	YIL104C
YIL102C-A:chrIX_173732_G_A	0.0525758	0.259277	0.161081	0.161081	Upstream	YIL102C-A
FYV10:chrIX_180412_G_A	0.870766	0.949614	0.00891447	0.00891447	TSS	YIL097W
BMT5:chrIX_183268_T_C	0.431153	0.710031	-0.0991191	-0.0991191	TSS	YIL096C
RSM25:chrIX_188870_A_T	0.600323	0.829682	0.120841	0.120841	TSS	YIL093C
RSM25:chrIX_188877_T_C	0.569896	0.807485	0.0861957	0.0861957	TSS	YIL093C
RSM25:chrIX_188919_A_T	0.151419	0.425514	0.253102	0.253102	TSS	YIL093C
UTP25:chrIX_193298_T_C	0.17159	0.482416	-1.02471	-1.02471	Upstream	YIL091C
AVT7:chrIX_199445_T_C	0.00202766	0.0310805	-0.363807	-0.363807	TSS	YIL088C
SDS3:chrIX_203308_T_G	0.222999	0.513898	0.722959	0.722959	TSS	YIL084C
SDS3:chrIX_203415_A_G	0.307336	0.603484	0.589874	0.589874	TSS	YIL084C
CAB2:chrIX_204891_A_G	0.44536	0.759262	0.0818249	0.0818249	Upstream	YIL083C
AIR1:chrIX_212171_A_G	0.411818	0.739073	0.0825523	0.0825523	Upstream	YIL079C
THS1:chrIX_212310_G_A	0.412889	0.739651	0.0547558	0.0547558	Upstream	YIL078W
THS1:chrIX_212374_GA_G	0.576178	0.811462	0.0300671	0.0300671	TSS	YIL078W
FIS1:chrIX_241892_A_G	0.154088	0.429042	-0.165974	-0.165974	TSS	YIL065C
ARC15:chrIX_244502_G_A	0.642668	0.850976	0.0506171	0.0506171	TSS	YIL062C
ARC15:chrIX_244618_C_T	0.644358	0.851597	-0.049139	-0.049139	TSS	YIL062C
SNP1:chrIX_245601_A_T	0.0497768	0.235316	-0.071694	-0.071694	TSS	YIL061C
SNP1:chrIX_245693_G_A	0.964957	0.991081	-0.0016632	-0.0016632	TSS	YIL061C
YIL059C:chrIX_247477_T_G	0.397041	0.688263	-0.0698391	-0.0698391	TSS	YIL059C
YIL059C:chrIX_247481_C_G	0.63204	0.84679	-0.0513835	-0.0513835	TSS	YIL059C
YIL059C:chrIX_247491_A_G	0.172888	0.454268	-0.154945	-0.154945	TSS	YIL059C
YIL059C:chrIX_247492_A_T	0.813242	0.927542	-0.0230299	-0.0230299	TSS	YIL059C
YIL059C:chrIX_247495_C_T	0.116655	0.3719	0.122211	0.122211	TSS	YIL059C
YIL059C:chrIX_247500_GCCA_G	0.595751	0.826374	-0.0446417	-0.0446417	TSS	YIL059C
YIL059C:chrIX_247508_T_TA	0.104055	0.351158	0.129518	0.129518	TSS	YIL059C
YIL059C:chrIX_247510_CG_C	0.0026713	0.0377088	-0.310516	-0.310516	TSS	YIL059C
YIL059C:chrIX_247513_T_TACAG	0.248547	0.545832	-0.10591	-0.10591	TSS	YIL059C
YIL059C:chrIX_247522_T_TTC	0.602058	0.830633	-0.0622238	-0.0622238	TSS	YIL059C
YIL059C:chrIX_247526_A_AG	0.382429	0.673635	-0.0748153	-0.0748153	TSS	YIL059C
YIL059C:chrIX_247527_A_G	0.277789	0.574312	-0.093682	-0.093682	TSS	YIL059C
YIL059C:chrIX_247530_T_C	0.114773	0.369773	-0.14257	-0.14257	TSS	YIL059C
YIL059C:chrIX_247536_A_T	5.59394e-06	0.000287756	0.507806	0.507806	TSS	YIL059C
YIL059C:chrIX_247539_A_T	0.780611	0.913834	-0.023245	-0.023245	TSS	YIL059C
YIL059C:chrIX_247598_A_C	0.0901746	0.323117	-0.182358	-0.182358	TSS	YIL059C
YIL054W:chrIX_253318_T_C	0.0685273	0.279562	0.744902	0.744902	TSS	YIL054W
RPL34B:chrIX_257135_G_A	0.285496	0.581445	-0.0914879	-0.0914879	TSS	YIL052C
MMF1:chrIX_258345_G_A	0.113771	0.368511	0.623177	0.623177	TSS	YIL051C
DFG10:chrIX_260018_T_A	0.442277	0.758165	0.0507041	0.0507041	Upstream	YIL049W
DFG10:chrIX_260022_C_T	0.429958	0.75028	0.0617847	0.0617847	Upstream	YIL049W
MET30:chrIX_268466_G_T	0.830567	0.935698	-0.0153187	-0.0153187	TSS	YIL046W
MET30:chrIX_268483_G_C	0.320716	0.616059	-0.0844642	-0.0844642	TSS	YIL046W
PIG2:chrIX_270915_C_A	0.00012159	0.00341691	0.345715	0.345715	TSS	YIL045W
PIG2:chrIX_270968_T_A	0.00254381	0.0362463	0.220148	0.220148	TSS	YIL045W
PIG2:chrIX_270969_A_C	0.00331884	0.0434167	0.232353	0.232353	TSS	YIL045W
AGE2:chrIX_273888_T_G	0.242069	0.537438	0.132838	0.132838	TSS	YIL044C
AGE2:chrIX_274009_G_A	0.00228424	0.0380905	-0.414203	-0.414203	Upstream	YIL044C
PKP1:chrIX_276321_T_A	0.190071	0.474005	-0.0697946	-0.0697946	TSS	YIL042C
GVP36:chrIX_276483_T_C	0.685571	0.873762	-0.0241856	-0.0241856	TSS	YIL041W
APQ12:chrIX_277596_T_C	0.0199994	0.151009	0.744927	0.744927	Upstream	YIL040W
TED1:chrIX_278371_G_A	0.0236698	0.15583	0.30017	0.30017	TSS	YIL039W
CST6:chrIX_285394_C_G	0.0345508	0.190658	0.243486	0.243486	TSS	YIL036W
CST6:chrIX_285492_C_T	0.00251048	0.040503	0.352389	0.352389	Upstream	YIL036W
CKA1:chrIX_289043_C_G	0.160983	0.43871	0.0730862	0.0730862	TSS	YIL035C
CAP2:chrIX_290193_GAAA_GAA	0.718855	0.886049	0.0511945	0.0511945	TSS	YIL034C
EMC5:chrIX_304231_C_G	0.625832	0.845292	-0.0772464	-0.0772464	TSS	YIL027C
YKE4:chrIX_310500_G_GTT	0.794851	0.91809	-0.0442204	-0.0442204	TSS	YIL023C
YKE4:chrIX_310533_G_A	0.582229	0.815067	-0.0914478	-0.0914478	TSS	YIL023C
TIM44:chrIX_310945_G_T	0.131193	0.394619	0.143353	0.143353	TSS	YIL022W
MNT3:chrIX_325821_AT_A	0.00493062	0.066171	-0.236083	-0.236083	Upstream	YIL014W
MNT3:chrIX_325886_A_G	0.00815286	0.0888661	-0.245551	-0.245551	Upstream	YIL014W
DOT5:chrIX_334708_T_TA	0.968867	0.992589	0.00315185	0.00315185	TSS	YIL010W
DOT5:chrIX_334764_G_A	3.76191e-05	0.00141557	-0.248054	-0.248054	TSS	YIL010W
DOT5:chrIX_334815_T_C	0.7523	0.899973	-0.0171573	-0.0171573	TSS	YIL010W
EST3:chrIX_336289_A_G	0.669728	0.865086	-0.0278774	-0.0278774	TSS	YIL009C-A
EST3:chrIX_336340_T_TA	0.0933039	0.330044	0.132348	0.132348	TSS	YIL009C-A
URM1:chrIX_342354_CT_C	0.991835	0.996372	0.00056185	0.00056185	TSS	YIL008W
URM1:chrIX_342479_C_A	0.6203	0.841112	0.0290574	0.0290574	TSS	YIL008W
BET1:chrIX_348652_G_C	0.213725	0.505577	0.0610172	0.0610172	TSS	YIL004C
DJP1:chrIX_363069_G_A	0.5325	0.781949	0.0547667	0.0547667	TSS	YIR004W
DJP1:chrIX_363071_CTTT_CT	0.762822	0.904481	0.0307216	0.0307216	TSS	YIR004W
STS1:chrIX_378389_A_T	0.332758	0.631413	0.0684144	0.0684144	TSS	YIR011C
YIR020C:chrIX_395649_G_A	0.0839583	0.30924	-0.23394	-0.23394	TSS	YIR020C
YIR020C:chrIX_395693_T_C	0.506203	0.761063	-0.0830206	-0.0830206	TSS	YIR020C
MND2:chrIX_403510_C_T	0.0101667	0.0912898	0.23314	0.23314	TSS	YIR025W
YVH1:chrIX_406065_G_T	0.744509	0.896097	0.0475294	0.0475294	TSS	YIR026C
YVH1:chrIX_406066_A_ATTT	0.549864	0.79282	-0.0838254	-0.0838254	TSS	YIR026C
YVH1:chrIX_406070_C_T	0.273364	0.572376	0.171606	0.171606	TSS	YIR026C
YVH1:chrIX_406124_AT_A	0.709222	0.882788	0.0523651	0.0523651	TSS	YIR026C
DCG1:chrIX_412923_T_C	2.44337e-11	6.17969e-09	-0.632332	-0.632332	TSS	YIR030C
DAL7:chrIX_414918_G_A	0.946619	0.982105	0.00605223	0.00605223	Upstream	YIR031C
DAL3:chrIX_415811_A_C	0.952368	0.982751	-0.00634661	-0.00634661	Upstream	YIR032C
MGA2:chrIX_416075_A_T	0.281351	0.577741	0.316011	0.316011	TSS	YIR033W
LYS1:chrIX_420788_C_G	0.826111	0.934146	-0.011321	-0.011321	TSS	YIR034C
HYR1:chrIX_422955_A_G	0.290504	0.58646	-0.0490894	-0.0490894	TSS	YIR037W
HYR1:chrIX_423054_T_C	0.530473	0.779654	0.0341934	0.0341934	TSS	YIR037W
GTT1:chrIX_424571_C_T	0.262877	0.561063	-0.082873	-0.082873	TSS	YIR038C
GTT1:chrIX_424605_T_A	0.154183	0.453617	0.129451	0.129451	Upstream	YIR038C
GTT1:chrIX_424642_C_T	0.152276	0.451199	-0.117436	-0.117436	Upstream	YIR038C
YJL213W:chrX_31756_A_T	5.54922e-05	0.00191385	-0.199991	-0.199991	TSS	YJL213W
YJL213W:chrX_31774_A_G	0.000144531	0.00489325	0.319904	0.319904	Upstream	YJL213W
YJL213W:chrX_31779_A_T	0.0018936	0.0296242	0.13666	0.13666	TSS	YJL213W
YJL213W:chrX_31798_C_G	0.00396031	0.0494631	-0.13586	-0.13586	TSS	YJL213W
OPT1:chrX_36357_A_G	0.434218	0.71207	0.0791209	0.0791209	TSS	YJL212C
OPT1:chrX_36381_G_GA	0.0554979	0.248585	0.237815	0.237815	TSS	YJL212C
OPT1:chrX_36391_G_A	0.0511972	0.239468	0.261638	0.261638	TSS	YJL212C
PEX2:chrX_36794_C_T	0.402675	0.692182	-0.141365	-0.141365	TSS	YJL210W
PEX2:chrX_36818_C_G	0.129916	0.393026	-0.312181	-0.312181	TSS	YJL210W
PEX2:chrX_36820_G_A	0.505298	0.760704	-0.126366	-0.126366	TSS	YJL210W
CBP1:chrX_37825_GTTT_GTT	0.0853047	0.311927	-0.118617	-0.118617	TSS	YJL209W
CBP1:chrX_37852_G_GA	0.321026	0.616264	-0.0837409	-0.0837409	TSS	YJL209W
CBP1:chrX_37925_G_C	0.00807598	0.0793893	-0.222944	-0.222944	TSS	YJL209W
NUC1:chrX_41250_G_T	0.0110509	0.0972161	-0.244473	-0.244473	TSS	YJL208C
NUC1:chrX_41329_AT_A	0.0626082	0.267628	-0.165153	-0.165153	TSS	YJL208C
NCE101:chrX_50478_A_T	0.532678	0.781949	-0.121554	-0.121554	TSS	YJL205C
RCY1:chrX_53312_A_G	0.463721	0.734777	0.0777349	0.0777349	TSS	YJL204C
ECM25:chrX_54232_C_G	0.00409965	0.0509935	0.245773	0.245773	TSS	YJL201W
ECM25:chrX_54266_C_T	0.508354	0.762656	0.0550581	0.0550581	TSS	YJL201W
MBB1:chrX_60211_T_C	0.616112	0.83965	0.0444439	0.0444439	TSS	YJL199C
MBB1:chrX_60220_CT_C	0.0287439	0.171167	-0.214908	-0.214908	TSS	YJL199C
MBB1:chrX_60299_C_T	0.0148713	0.116929	-0.205392	-0.205392	TSS	YJL199C
UBP12:chrX_63649_T_A	0.109426	0.362837	0.0694548	0.0694548	TSS	YJL197W
ELO1:chrX_68934_C_G	0.796316	0.91809	-0.0107386	-0.0107386	TSS	YJL196C
YJL193W:chrX_71276_G_GA	0.372588	0.705144	-0.06373	-0.06373	Upstream	YJL193W
YJL193W:chrX_71299_T_A	0.000333181	0.00732758	-0.209393	-0.209393	TSS	YJL193W
SOP4:chrX_73580_G_T	0.315576	0.653526	-0.0744075	-0.0744075	Upstream	YJL192C
RPS14B:chrX_73708_C_A	1.89574e-06	0.00011742	-0.247002	-0.247002	TSS	YJL191W
RPL39:chrX_75343_G_C	0.826337	0.943963	-0.0177919	-0.0177919	Upstream	YJL189W
MNN5:chrX_80055_T_A	0.0102956	0.0919032	0.426936	0.426936	TSS	YJL186W
MNN5:chrX_80077_T_G	0.0637309	0.282069	-0.294659	-0.294659	Upstream	YJL186W
MNN5:chrX_80094_A_T	0.0359274	0.211541	-0.227617	-0.227617	Upstream	YJL186W
MNN5:chrX_80102_T_G	0.283685	0.580179	-0.198134	-0.198134	TSS	YJL186W
GON7:chrX_83271_G_C	0.0429887	0.221424	-0.160237	-0.160237	TSS	YJL184W
GON7:chrX_83298_G_A	0.175838	0.458084	0.115853	0.115853	TSS	YJL184W
GON7:chrX_83388_G_A	0.737533	0.894288	0.0275065	0.0275065	TSS	YJL184W
MNN11:chrX_83886_A_AT	0.00947786	0.0953749	-0.196141	-0.196141	Upstream	YJL183W
MNN11:chrX_83936_AT_A	0.770986	0.925346	0.0263954	0.0263954	Upstream	YJL183W
ATP12:chrX_88580_G_A	0.0640924	0.270585	0.186541	0.186541	TSS	YJL180C
ATP12:chrX_88585_C_T	0.291023	0.58646	0.103549	0.103549	TSS	YJL180C
ATP12:chrX_88714_T_C	0.00303292	0.0409107	0.270732	0.270732	TSS	YJL180C
ATG27:chrX_90241_C_A	0.127953	0.413359	0.254069	0.254069	Upstream	YJL178C
RPL17B:chrX_90680_T_G	0.0908986	0.324215	-0.163468	-0.163468	TSS	YJL177W
YJL175W:chrX_91730_G_A	0.230854	0.523281	0.231837	0.231837	TSS	YJL175W
YJL175W:chrX_91769_G_GAA	0.0812627	0.304861	0.341432	0.341432	TSS	YJL175W
YJL175W:chrX_91804_A_T	0.809074	0.925571	0.0512812	0.0512812	TSS	YJL175W
YJL175W:chrX_91817_A_T	0.62054	0.841112	0.0817163	0.0817163	TSS	YJL175W
KRE9:chrX_94846_A_G	0.395267	0.726635	0.0859483	0.0859483	Upstream	YJL174W
KRE9:chrX_94892_TC_T	0.106785	0.37547	-0.195022	-0.195022	Upstream	YJL174W
YJL171C:chrX_101045_G_GA	0.252262	0.551993	-0.118024	-0.118024	TSS	YJL171C
ERG20:chrX_104563_C_T	0.108719	0.37988	0.343951	0.343951	Upstream	YJL167W
QCR8:chrX_106326_G_A	0.240774	0.534955	0.130108	0.130108	TSS	YJL166W
TPK1:chrX_111408_A_AT	0.642616	0.85216	0.0435233	0.0588467	Upstream	YJL164C
TPK1:chrX_111416_A_C	0.000950107	0.0198285	0.225537	0.225537	Upstream	YJL164C
YJL163C:chrX_113461_T_C	0.0277725	0.168529	-0.217505	-0.217505	TSS	YJL163C
YJL163C:chrX_113474_AT_ATTTT	0.043554	0.22173	-0.598216	-0.598216	TSS	YJL163C
YJL163C:chrX_113505_G_A	0.00313544	0.0418897	0.351158	0.351158	TSS	YJL163C
FMP33:chrX_117161_TA_T	0.118575	0.373703	0.483233	0.483233	TSS	YJL161W
FMP33:chrX_117184_G_C	0.467842	0.738406	0.197907	0.197907	TSS	YJL161W
YJL160C:chrX_118904_G_T	0.0156795	0.12017	-0.253777	-0.253777	TSS	YJL160C
YJL160C:chrX_118988_C_T	3.57695e-08	3.39251e-06	-0.645601	-0.645601	TSS	YJL160C
YJL160C:chrX_118997_C_T	0.134648	0.39908	-0.126824	-0.126824	TSS	YJL160C
HSP150:chrX_120291_T_A	0.000267821	0.00612528	-0.195554	-0.195554	TSS	YJL159W
HSP150:chrX_120358_A_G	0.602106	0.830633	0.0241871	0.0241871	TSS	YJL159W
FBP26:chrX_130774_T_A	0.273358	0.572376	0.19877	0.19877	TSS	YJL155C
VPS35:chrX_134112_GAAAAA_G	0.0908718	0.324215	-0.403351	-0.403351	TSS	YJL154C
INO1:chrX_135953_GA_G	0.976849	0.993902	0.00314583	0.00314583	TSS	YJL153C
DAS1:chrX_136809_GT_G	0.801496	0.935219	-0.0252292	-0.0252292	Upstream	YJL149W
YJL150W:chrX_136911_GAAAAAAA_GAAAAAAAAAAAA	0.925477	0.977768	-0.0154477	-0.0154477	Upstream	YJL150W
IDS2:chrX_143163_G_A	0.56537	0.806352	0.038373	0.038373	TSS	YJL146W
RPB4:chrX_150764_A_C	0.0110861	0.0972436	0.0993673	0.0993673	TSS	YJL140W
RPB4:chrX_150818_A_G	0.771671	0.909431	-0.0109796	-0.0109796	TSS	YJL140W
RPB4:chrX_150829_C_T	0.71004	0.90662	0.0430639	0.0430639	Upstream	YJL140W
YJL133C-A:chrX_159893_T_C	0.103494	0.350563	-0.109386	-0.109386	TSS	YJL133C-A
YJL133C-A:chrX_159916_GA_G	0.0879737	0.31856	-0.112998	-0.112998	TSS	YJL133C-A
YJL133C-A:chrX_159934_T_C	0.139336	0.405838	-0.104912	-0.104912	TSS	YJL133C-A
YJL133C-A:chrX_159938_C_T	0.293667	0.629447	0.24677	0.24677	Upstream	YJL133C-A
YJL133C-A:chrX_160500_C_T	0.89391	0.965276	-0.0171705	-0.0171705	Upstream	YJL133C-A
AIM23:chrX_165521_G_T	0.326228	0.623882	-0.225898	-0.225898	TSS	YJL131C
SPT10:chrX_184421_G_T	6.38115e-07	4.61114e-05	-0.529537	-0.529537	TSS	YJL127C
ALB1:chrX_189631_G_T	0.872533	0.950516	0.0330626	0.0330626	TSS	YJL122W
NCA3:chrX_195076_C_T	0.000147314	0.00385482	-0.334682	-0.334682	TSS	YJL116C
ASF1:chrX_196206_C_G	0.783235	0.913834	-0.032586	-0.032586	TSS	YJL115W
CCT7:chrX_207695_T_A	0.164901	0.473614	0.0981262	0.0981262	Upstream	YJL111W
CCT7:chrX_207747_GAAA_GA	0.118182	0.397409	0.139645	0.139645	Upstream	YJL111W
PAM16:chrX_227303_A_T	0.698989	0.880516	0.03191	0.03191	TSS	YJL104W
IML2:chrX_281003_T_C	0.150473	0.424634	0.189597	0.189597	TSS	YJL082W
IML2:chrX_281006_C_A	0.680664	0.870482	0.0603164	0.0603164	TSS	YJL082W
IML2:chrX_281056_T_C	0.488311	0.750415	-0.108589	-0.108589	TSS	YJL082W
PRY3:chrX_294080_A_G	0.174927	0.456103	-0.149809	-0.149809	TSS	YJL078C
YJL077W-B:chrX_291961_G_A	0.890617	0.959045	-0.0139643	-0.0139643	TSS	YJL077W-B
YJL077W-A:chrX_294588_G_T	0.0125497	0.104927	0.238637	0.238637	TSS	YJL077W-A
ARG2:chrX_305977_G_T	0.160862	0.43871	-0.0688364	-0.0688364	TSS	YJL071W
YJL070C:chrX_310784_T_C	0.511853	0.765086	-0.134525	-0.134525	TSS	YJL070C
MRPL8:chrX_316535_C_T	0.0390974	0.210466	0.074605	0.074605	TSS	YJL063C
COA3:chrX_316571_G_T	0.0348109	0.191397	0.354007	0.354007	TSS	YJL062W-A
MRPL8:chrX_316590_T_C	0.0616983	0.266294	-0.0705104	-0.0705104	TSS	YJL063C
BNA3:chrX_323313_G_A	0.778962	0.92881	-0.0293606	-0.0293606	Upstream	YJL060W
YHC3:chrX_324792_G_A	0.788827	0.916742	0.0247014	0.0247014	TSS	YJL059W
YHC3:chrX_324830_T_A	0.0162546	0.122414	0.25304	0.25304	TSS	YJL059W
BIT61:chrX_327946_C_G	0.297518	0.591333	0.0689566	0.0689566	TSS	YJL058C
BIT61:chrX_327986_G_C	0.355703	0.652696	0.0662544	0.0662544	TSS	YJL058C
IKS1:chrX_330191_A_G	0.981478	0.994656	-0.00231911	-0.00231911	TSS	YJL057C
IKS1:chrX_330220_TC_TCC	0.634673	0.846844	0.0578099	0.0578099	TSS	YJL057C
TIM54:chrX_334125_C_T	0.363681	0.659756	-0.380607	-0.380607	TSS	YJL054W
TIM54:chrX_334204_A_G	0.309812	0.603733	0.336167	0.336167	TSS	YJL054W
PEP8:chrX_335788_C_A	0.948414	0.984418	-0.0115363	-0.0115363	TSS	YJL053W
IRC8:chrX_339657_C_T	0.1895	0.474005	-0.261084	-0.261084	TSS	YJL051W
IRC8:chrX_339669_C_G	0.344675	0.641773	-0.1577	-0.1577	TSS	YJL051W
MTR4:chrX_342360_T_G	0.44441	0.759262	0.260448	0.260448	Upstream	YJL050W
UBX6:chrX_348750_C_T	0.411955	0.698092	-0.18746	-0.18746	TSS	YJL048C
UBX6:chrX_348753_C_A	0.324528	0.621024	-0.247542	-0.247542	TSS	YJL048C
UBX6:chrX_348770_T_C	0.0496805	0.235227	-0.741412	-0.741412	TSS	YJL048C
RTT101:chrX_352304_A_G	1.43971e-06	9.70336e-05	-0.71296	-0.71296	TSS	YJL047C
RTT101:chrX_352322_G_A	1.84966e-05	0.000801958	-0.746615	-0.746615	TSS	YJL047C
YJL045W:chrX_355954_GC_G	0.629494	0.846459	-0.18465	-0.18465	TSS	YJL045W
GYP6:chrX_359824_GAAA_GAAAA	0.0452511	0.225081	-0.548704	-0.548704	TSS	YJL044C
MHP1:chrX_361124_A_G	0.0173553	0.128785	-0.259558	-0.259558	TSS	YJL042W
LOH1:chrX_375921_T_G	0.0547117	0.247834	-0.257865	-0.257865	TSS	YJL038C
LOH1:chrX_375929_G_A	0.202612	0.490637	0.236426	0.236426	TSS	YJL038C
TAD2:chrX_381270_T_C	0.193093	0.513705	0.217477	0.217477	Upstream	YJL035C
YJL027C:chrX_392321_C_T	0.126586	0.38562	-0.11023	-0.11023	TSS	YJL027C
YJL027C:chrX_392346_G_A	0.207516	0.49709	-0.0734832	-0.0734832	TSS	YJL027C
YJL016W:chrX_405244_A_G	0.000176532	0.0044648	-0.360805	-0.360805	TSS	YJL016W
YJL016W:chrX_405265_A_T	0.37583	0.667434	0.066176	0.066176	TSS	YJL016W
YJL016W:chrX_405306_G_A	0.428311	0.708629	0.0641159	0.0641159	TSS	YJL016W
CCT3:chrX_407487_CAA_CAAA	0.284013	0.580313	0.0691465	0.0691465	TSS	YJL014W
RPC17:chrX_414836_C_T	0.077629	0.29899	-0.654135	-0.654135	TSS	YJL011C
YJL009W:chrX_419705_G_GA	0.0362931	0.212574	-0.232184	-0.232184	Upstream	YJL009W
COX16:chrX_432578_A_T	0.108322	0.360876	0.097113	0.097113	TSS	YJL003W
OST1:chrX_434839_C_T	0.234535	0.567174	-0.127063	-0.127063	Upstream	YJL002C
PRE3:chrX_435102_T_A	0.189673	0.474005	-0.0859156	-0.0859156	TSS	YJL001W
AVT1:chrX_436602_T_C	0.138371	0.404581	0.297652	0.297652	TSS	YJR001W
AVT1:chrX_436624_G_GT	0.280103	0.57669	0.212418	0.212418	TSS	YJR001W
MPP10:chrX_438727_A_G	0.724081	0.888028	-0.0305677	-0.0305677	TSS	YJR002W
MPP10:chrX_438766_G_A	0.0223618	0.151492	-0.224016	-0.224016	TSS	YJR002W
SUI2:chrX_450783_GT_TT	0.082121	0.306942	-0.138631	-0.138631	TSS	YJR007W
SUI2:chrX_450888_A_G	0.501181	0.796599	0.0740382	0.0740382	Upstream	YJR007W
MHO1:chrX_452205_T_C	0.838014	0.938326	0.0143769	0.0143769	TSS	YJR008W
MHO1:chrX_452260_C_G	0.276982	0.574312	-0.0857973	-0.0857973	TSS	YJR008W
MHO1:chrX_452288_C_T	0.459173	0.730393	-0.0510982	-0.0510982	TSS	YJR008W
SPC1:chrX_458442_G_GT	0.732063	0.890074	-0.0229865	-0.0229865	TSS	YJR010C-A
TMA22:chrX_461660_GA_GAAA	0.930407	0.976796	-0.0247903	-0.0247903	TSS	YJR014W
TMA22:chrX_461695_A_G	3.51787e-05	0.00179865	0.4583	0.4583	Upstream	YJR014W
YJR015W:chrX_462583_T_C	0.0271842	0.178919	-0.249291	-0.249291	Upstream	YJR015W
YJR015W:chrX_462605_A_G	0.846012	0.950251	-0.024921	-0.024921	Upstream	YJR015W
YJR015W:chrX_462616_TC_T	0.0219295	0.157063	0.220052	0.220052	Upstream	YJR015W
YJR015W:chrX_462634_A_G	0.147249	0.446139	0.318109	0.318109	Upstream	YJR015W
YJR018W:chrX_466454_C_T	0.00421995	0.0516433	-0.132141	-0.132141	TSS	YJR018W
YJR018W:chrX_466456_A_T	0.876986	0.951639	0.00622672	0.00622672	TSS	YJR018W
REC107:chrX_469616_T_C	0.258993	0.55827	-0.0709669	-0.0709669	TSS	YJR021C
REC107:chrX_469702_A_G	4.97569e-05	0.00173577	-0.223773	-0.223773	TSS	YJR021C
BNA1:chrX_471814_A_G	3.44537e-06	0.000209134	0.235146	0.235146	TSS	YJR025C
GEA1:chrX_490924_T_C	0.354563	0.687603	-0.162573	-0.162573	Upstream	YJR031C
GEA1:chrX_491023_GA_GAA	0.135225	0.400399	-0.217593	-0.217593	TSS	YJR031C
RAD26:chrX_497259_T_C	0.0631526	0.268819	0.504719	0.504719	TSS	YJR035W
HUL4:chrX_503620_TG_T	0.0665701	0.276768	0.310674	0.310674	TSS	YJR036C
URB2:chrX_513858_T_C	0.183409	0.466944	-0.252843	-0.252843	TSS	YJR041C
URB2:chrX_513874_A_G	0.586167	0.839609	0.0539458	0.0539458	Upstream	YJR041C
POL32:chrX_517619_C_CA	0.0333852	0.186257	-0.190257	-0.190257	TSS	YJR043C
VPS55:chrX_519319_C_T	0.561982	0.805295	0.0892584	0.0892584	TSS	YJR044C
VPS55:chrX_519377_G_A	0.730437	0.889954	0.0488974	0.0488974	TSS	YJR044C
TAH11:chrX_521978_AAT_A	0.105637	0.373565	0.215532	0.215532	Upstream	YJR046W
CYC1:chrX_526273_T_G	0.259542	0.559056	-0.164895	-0.164895	TSS	YJR048W
ISY1:chrX_528639_A_T	0.101414	0.348182	-0.11316	-0.11316	TSS	YJR050W
OSM1:chrX_529735_GAA_GA	0.800112	0.935219	-0.0169327	-0.0169327	Upstream	YJR051W
RAD7:chrX_532027_T_C	0.74097	0.895433	0.0191175	0.0191175	TSS	YJR052W
KCH1:chrX_535873_C_T	0.0530357	0.245371	0.133693	0.133693	TSS	YJR054W
KCH1:chrX_535930_G_C	0.60174	0.830633	-0.0335638	-0.0335638	TSS	YJR054W
HIT1:chrX_538650_T_TAC	0.102893	0.349807	-0.183919	-0.183919	TSS	YJR055W
HIT1:chrX_538651_CTT_C	0.0422745	0.219697	-0.215126	-0.215126	TSS	YJR055W
HIT1:chrX_538656_T_C	0.854207	0.941458	0.0234562	0.0234562	TSS	YJR055W
CDC8:chrX_543944_GTGACTTT_G	0.0132244	0.108476	0.520431	0.520431	TSS	YJR057W
APS2:chrX_545209_T_C	0.318294	0.613347	0.0797304	0.0797304	TSS	YJR058C
APS2:chrX_545233_C_T	0.951149	0.985908	0.00438516	0.00438516	TSS	YJR058C
APS2:chrX_545239_C_A	0.763132	0.904481	0.0244058	0.0244058	TSS	YJR058C
APS2:chrX_545249_A_G	0.120312	0.375278	-0.135216	-0.135216	TSS	YJR058C
CBF1:chrX_548667_A_T	0.213392	0.539079	0.166405	0.166405	Upstream	YJR060W
CBF1:chrX_548670_A_G	0.294254	0.629528	0.146129	0.146129	Upstream	YJR060W
NTA1:chrX_554957_C_T	0.00217752	0.0370013	0.350515	0.350515	Upstream	YJR062C
NTA1:chrX_554999_C_T	0.417203	0.701502	-0.0549644	-0.0549644	TSS	YJR062C
NTA1:chrX_555085_GA_G	0.00603479	0.0732866	-0.313378	-0.313378	Upstream	YJR062C
NTA1:chrX_555138_T_C	0.99363	0.997145	0.00392318	0.00392318	Upstream	YJR062C
HAM1:chrX_569546_CG_C	9.37548e-05	0.00280355	-0.379848	-0.379848	TSS	YJR069C
LIA1:chrX_570648_C_G	0.0447407	0.222969	0.732236	0.732236	TSS	YJR070C
LIA1:chrX_570721_T_C	0.442101	0.717701	0.281036	0.281036	TSS	YJR070C
MIR1:chrX_578278_G_A	0.193008	0.478502	0.222765	0.222765	TSS	YJR077C
EAF6:chrX_582415_G_A	0.220209	0.512134	0.175188	0.175188	TSS	YJR082C
EAF6:chrX_582424_CT_C	0.000773464	0.0144016	0.430278	0.430278	TSS	YJR082C
EAF6:chrX_582462_A_T	0.0387991	0.220042	0.336616	0.336616	Upstream	YJR082C
EAF6:chrX_582469_GA_G	0.940492	0.979971	-0.00988661	-0.00988661	TSS	YJR082C
BIR1:chrX_587511_G_T	8.80171e-05	0.00275394	-0.784037	-0.784037	TSS	YJR089W
JSN1:chrX_598472_A_C	0.0605932	0.262715	0.123261	0.123261	TSS	YJR091C
IME1:chrX_605865_C_A	0.00271231	0.0379349	0.345292	0.345292	TSS	YJR094C
RPL43B:chrX_608157_C_T	0.326594	0.664337	-0.0627479	-0.0627479	Upstream	YJR094W-A
RPL43B:chrX_608181_A_C	0.112634	0.367329	0.262594	0.262594	TSS	YJR094W-A
RPL43B:chrX_608184_A_T	0.0310137	0.177597	0.338474	0.338474	TSS	YJR094W-A
YJR096W:chrX_610951_T_C	0.0032251	0.0425573	0.300938	0.300938	TSS	YJR096W
JJJ3:chrX_612210_A_C	0.614085	0.838453	0.168727	0.168727	TSS	YJR097W
JJJ3:chrX_612277_C_G	0.486596	0.749274	0.167382	0.167382	TSS	YJR097W
YJR098C:chrX_615292_C_A	0.137776	0.40362	0.180598	0.180598	TSS	YJR098C
URA8:chrX_620583_T_C	0.202406	0.526515	0.139988	0.139988	Upstream	YJR103W
URA8:chrX_620664_T_G	0.000935014	0.0169926	0.396966	0.396966	TSS	YJR103W
ADO1:chrX_623184_C_G	0.785289	0.93075	-0.0229321	-0.0229321	Upstream	YJR105W
ADO1:chrX_623186_C_T	0.239303	0.573648	-0.0905565	-0.0905565	Upstream	YJR105W
ECM27:chrX_624670_A_G	0.698634	0.880516	0.0761561	0.0761561	TSS	YJR106W
YJR107W:chrX_626946_C_T	0.224536	0.515481	-0.160211	-0.160211	TSS	YJR107W
YMR1:chrX_633487_T_C	0.535993	0.811709	-0.149787	-0.149787	Upstream	YJR110W
IBA57:chrX_649610_T_C	0.905042	0.963814	-0.00642762	-0.00642762	TSS	YJR122W
NMD5:chrX_669427_G_A	0.321312	0.616423	-0.162872	-0.162872	TSS	YJR132W
XPT1:chrX_672798_CT_C	0.445894	0.759262	0.107721	0.107721	Upstream	YJR133W
SGM1:chrX_675971_G_A	0.155454	0.431475	0.131535	0.131535	TSS	YJR134C
BAT2:chrX_705581_A_G	0.0620662	0.279611	0.18744	0.18744	Upstream	YJR148W
BAT2:chrX_705586_C_A	0.474713	0.742693	-0.0496427	-0.0496427	TSS	YJR148W
URA1:chrXI_25095_TGGCATGGCATAC_T	0.0233984	0.155558	-0.166292	-0.166292	TSS	YKL216W
URA1:chrXI_25154_C_T	0.974687	0.99301	-0.00247487	-0.00247487	TSS	YKL216W
YRA2:chrXI_31804_G_A	0.193711	0.479147	-0.0522418	-0.0522418	TSS	YKL214C
YRA2:chrXI_31861_A_G	0.905064	0.963814	-0.00406726	-0.00406726	TSS	YKL214C
CBT1:chrXI_46995_A_G	0.00913227	0.0943858	0.436032	0.436032	Upstream	YKL208W
CBT1:chrXI_47023_C_T	0.141891	0.437253	-0.2866	-0.2866	Upstream	YKL208W
EAP1:chrXI_53539_C_T	0.728001	0.889275	-0.0287375	-0.0287375	TSS	YKL204W
CNB1:chrXI_82791_G_C	0.159032	0.435616	-0.14194	-0.14194	TSS	YKL190W
HYM1:chrXI_84589_C_T	0.000772512	0.0144016	-0.313361	-0.313361	TSS	YKL189W
ASH1:chrXI_93529_C_G	0.453821	0.76673	-0.0731342	-0.0731342	Upstream	YKL185W
SPE1:chrXI_96552_C_T	0.0556388	0.248695	-0.211903	-0.211903	TSS	YKL184W
LOT5:chrXI_98452_C_T	0.0521252	0.242267	0.113128	0.113128	TSS	YKL183W
RPL17A:chrXI_109176_C_T	0.0218262	0.149681	0.245314	0.245314	TSS	YKL180W
ZRT3:chrXI_118745_G_A	0.0307305	0.177044	-0.445748	-0.445748	TSS	YKL175W
SNU114:chrXI_122402_G_A	0.476557	0.744285	-0.0423629	-0.0423629	TSS	YKL173W
EBP2:chrXI_125651_T_A	0.170509	0.452356	0.24246	0.24246	TSS	YKL172W
EBP2:chrXI_125700_C_T	0.329802	0.628736	0.24615	0.24615	TSS	YKL172W
NNK1:chrXI_127196_G_A	0.352975	0.649654	0.112826	0.112826	TSS	YKL171W
NNK1:chrXI_127208_G_A	0.0780944	0.299869	-0.22686	-0.22686	TSS	YKL171W
MRPL38:chrXI_130518_C_G	0.371264	0.704835	0.0707472	0.0707472	Upstream	YKL170W
MRPL38:chrXI_130533_G_C	0.150123	0.448781	0.162688	0.162688	Upstream	YKL170W
KKQ8:chrXI_133472_C_A	0.21026	0.502076	-0.152262	-0.152262	TSS	YKL168C
KKQ8:chrXI_133596_C_G	0.0286448	0.183928	0.254606	0.254606	Upstream	YKL168C
KKQ8:chrXI_133597_A_T	0.0932472	0.330044	-0.270691	-0.270691	TSS	YKL168C
TPK3:chrXI_135796_C_T	0.145574	0.414605	-0.0987572	-0.0987572	TSS	YKL166C
PIR1:chrXI_142986_A_G	0.988065	0.994915	-0.0013735	-0.0013735	TSS	YKL164C
YKL162C:chrXI_148984_G_T	0.137242	0.42899	-0.132903	-0.132903	Upstream	YKL162C
KDX1:chrXI_150866_C_T	0.0222557	0.15111	0.126023	0.126023	TSS	YKL161C
RCN1:chrXI_154565_T_C	0.694047	0.899564	0.0484139	0.0484139	Upstream	YKL159C
AVT3:chrXI_171361_G_A	4.72368e-05	0.00216584	-0.666724	-0.666724	Upstream	YKL146W
RPC25:chrXI_176572_G_A	0.412699	0.698855	-0.049293	-0.049293	TSS	YKL144C
RPC25:chrXI_176582_G_A	0.40205	0.722488	-0.0484823	-0.0486303	Upstream	YKL144C
MRP8:chrXI_178383_G_A	0.0538025	0.247474	0.383034	0.383034	TSS	YKL142W
MRP8:chrXI_178399_A_G	0.592845	0.824784	0.0946399	0.0946399	TSS	YKL142W
MRP8:chrXI_178417_T_A	0.744721	0.896097	0.0863801	0.0863801	TSS	YKL142W
MRP8:chrXI_178422_G_A	0.183012	0.466728	0.25149	0.25149	TSS	YKL142W
SDH3:chrXI_179509_G_A	0.0146224	0.125669	-0.251217	-0.251217	Upstream	YKL141W
CTK1:chrXI_182668_GT_GTT	0.0967707	0.338363	-0.121615	-0.121615	TSS	YKL139W
CMC1:chrXI_185846_C_T	0.192016	0.477288	0.125998	0.125998	TSS	YKL137W
RMA1:chrXI_195038_G_T	0.117512	0.373064	-0.387605	-0.387605	TSS	YKL132C
RMA1:chrXI_195050_T_C	0.0278718	0.168529	-0.475968	-0.475968	TSS	YKL132C
RMA1:chrXI_195054_AT_A	0.0946711	0.332964	-0.325287	-0.325287	TSS	YKL132C
RMA1:chrXI_195077_C_T	0.304936	0.600824	-0.230045	-0.230045	TSS	YKL132C
SHE2:chrXI_196171_A_G	0.122232	0.378159	0.232745	0.232745	TSS	YKL130C
SHE2:chrXI_196211_GAAAAAA_GA	0.00978865	0.0973102	-0.296089	-0.296089	Upstream	YKL130C
MYO3:chrXI_200393_C_CTTTATT	0.015313	0.128967	0.197505	0.197505	Upstream	YKL129C
PMU1:chrXI_201927_C_T	0.0600312	0.274595	-0.363508	-0.363508	Upstream	YKL128C
PGM1:chrXI_203486_C_T	0.788972	0.916742	-0.0208156	-0.0208156	TSS	YKL127W
SRP21:chrXI_213044_C_T	0.0253049	0.161848	0.143467	0.143467	TSS	YKL122C
VPH2:chrXI_219380_A_AG	0.275986	0.574312	-0.0578079	-0.0578079	TSS	YKL119C
SBA1:chrXI_220166_C_T	0.759243	0.922026	-0.0225308	-0.0225308	Upstream	YKL117W
SBA1:chrXI_220273_A_G	0.207156	0.497012	-0.0535625	-0.0535625	TSS	YKL117W
RAD27:chrXI_225909_T_A	0.566421	0.806352	-0.0815529	-0.0815529	TSS	YKL113C
KTI12:chrXI_229929_C_T	0.467877	0.738406	0.0362497	0.0362497	TSS	YKL110C
HAP4:chrXI_231860_A_G	0.0704673	0.283397	0.367787	0.367787	TSS	YKL109W
HAP4:chrXI_231899_G_A	0.312439	0.6063	0.209864	0.209864	TSS	YKL109W
HAP4:chrXI_231902_C_A	0.0264036	0.166601	0.517008	0.517008	TSS	YKL109W
HAP4:chrXI_231929_T_A	0.158865	0.435616	0.35088	0.35088	TSS	YKL109W
SLD2:chrXI_234119_G_A	0.70562	0.882788	0.0848126	0.0848126	TSS	YKL108W
SLD2:chrXI_234164_T_TTTA	0.144882	0.414605	0.352482	0.352482	TSS	YKL108W
SLD2:chrXI_234187_T_C	0.813548	0.927542	-0.0495249	-0.0495249	TSS	YKL108W
YKL107W:chrXI_236044_T_A	0.154872	0.430438	0.263865	0.263865	TSS	YKL107W
AAT1:chrXI_237351_C_G	0.0804657	0.303748	0.128422	0.128422	TSS	YKL106W
AAT1:chrXI_237391_G_A	0.991902	0.996372	0.000733586	0.000733586	TSS	YKL106W
AAT1:chrXI_237424_G_GA	0.084916	0.311256	-0.15373	-0.15373	TSS	YKL106W
SEG2:chrXI_242919_G_A	0.298521	0.591874	0.175928	0.175928	TSS	YKL105C
APE1:chrXI_247739_T_A	0.0297209	0.174427	0.0977422	0.0977422	TSS	YKL103C
APE1:chrXI_247741_A_G	0.755576	0.901435	0.0148923	0.0148923	TSS	YKL103C
APE1:chrXI_247756_G_A	0.282776	0.579881	0.0482246	0.0482246	TSS	YKL103C
APE1:chrXI_247793_T_C	0.0020729	0.0357676	-0.271426	-0.271426	Upstream	YKL103C
APE1:chrXI_247813_G_A	0.15033	0.448781	-0.137635	-0.137635	Upstream	YKL103C
APE1:chrXI_247876_G_T	0.0638942	0.282069	-0.178853	-0.178853	Upstream	YKL103C
YKL100C:chrXI_255600_C_T	0.447809	0.722426	-0.0365575	-0.0365575	TSS	YKL100C
UTP11:chrXI_256639_A_G	0.24898	0.545993	0.0898527	0.0898527	TSS	YKL099C
CWP2:chrXI_259074_T_TA	0.420321	0.703198	-0.0646559	-0.0646559	TSS	YKL096W-A
CWP1:chrXI_260953_T_C	0.228935	0.521086	0.0699038	0.0699038	TSS	YKL096W
CWP1:chrXI_260957_A_AC	0.00225832	0.0327942	0.211094	0.211094	TSS	YKL096W
CWP1:chrXI_260961_T_C	0.0908664	0.338067	-0.118101	-0.118101	Upstream	YKL096W
CWP1:chrXI_260979_GAA_G	0.0195255	0.149931	-0.303506	-0.303506	Upstream	YKL096W
CWP1:chrXI_261069_C_T	0.254512	0.553722	-0.0899402	-0.0899402	TSS	YKL096W
YJU3:chrXI_263187_C_T	0.428192	0.749545	-0.0576553	-0.0576553	Upstream	YKL094W
MBR1:chrXI_264611_T_G	0.369279	0.662559	0.085727	0.085727	TSS	YKL093W
BUD2:chrXI_269563_T_C	0.041117	0.2159	0.17827	0.17827	TSS	YKL092C
CUE2:chrXI_271769_TAA_T	0.566639	0.806352	0.219483	0.219483	TSS	YKL090W
SRX1:chrXI_278119_C_A	0.00831541	0.0808887	-0.224228	-0.224228	TSS	YKL086W
YKL069W:chrXI_307266_CA_C	0.120135	0.375278	-0.22418	-0.22418	TSS	YKL069W
YKL068W-A:chrXI_309090_T_A	0.950677	0.982497	0.0150258	0.0150258	Upstream	YKL068W-A
NUP100:chrXI_310035_GA_G	0.64266	0.870819	0.0406501	0.0406501	Upstream	YKL068W
YKL065W-A:chrXI_315610_T_TC	0.0456096	0.225081	0.209439	0.209439	TSS	YKL065W-A
YKL065W-A:chrXI_315617_A_G	0.818402	0.929726	-0.0222657	-0.0222657	TSS	YKL065W-A
YKL065W-A:chrXI_315654_G_C	0.399486	0.690848	0.0845636	0.0845636	TSS	YKL065W-A
YKL065W-A:chrXI_315726_A_G	0.669836	0.865086	-0.0422229	-0.0422229	TSS	YKL065W-A
DEF1:chrXI_338893_G_A	0.598018	0.828003	0.15938	0.15938	TSS	YKL054C
MDM35:chrXI_339536_A_G	0.000241201	0.00567477	0.4439	0.4439	TSS	YKL053C-A
PRI2:chrXI_353277_T_C	0.212982	0.539079	0.109803	0.109803	Upstream	YKL045W
PRI2:chrXI_353409_C_T	0.0895532	0.336597	-0.295445	-0.295445	Upstream	YKL045W
YKL044W:chrXI_356199_A_G	1.47069e-06	9.70336e-05	-0.506933	-0.506933	TSS	YKL044W
MAE1:chrXI_385609_T_G	0.0301934	0.189781	0.198264	0.198264	Upstream	YKL029C
TCD2:chrXI_387380_A_AAGCGG	0.0341852	0.205065	0.197959	0.197959	Upstream	YKL027W
TCD2:chrXI_387462_T_C	0.697564	0.899733	0.119902	0.119902	Upstream	YKL027W
PAN3:chrXI_392410_A_T	0.932524	0.976851	0.00799472	0.00799472	TSS	YKL025C
YKL023W:chrXI_393585_C_T	0.0281965	0.169563	-0.307084	-0.307084	TSS	YKL023W
YKL023W:chrXI_393593_A_G	0.292772	0.58646	-0.149669	-0.149669	TSS	YKL023W
YKL023W:chrXI_393616_T_C	0.626588	0.845292	0.0520986	0.0520986	TSS	YKL023W
YKL023W:chrXI_393642_A_G	0.0718592	0.30132	-0.202284	-0.202284	Upstream	YKL023W
RAM2:chrXI_402427_C_T	0.134724	0.414605	0.130269	-0.152645	Upstream	YKL019W
RAM2:chrXI_402484_T_C	0.115477	0.392445	0.105389	0.105389	Upstream	YKL019W
HCS1:chrXI_407251_C_T	2.10002e-05	0.00087309	-0.281427	-0.281427	TSS	YKL017C
HCS1:chrXI_407274_A_G	8.98622e-05	0.002762	-0.261883	-0.261883	TSS	YKL017C
HCS1:chrXI_407314_T_C	0.340365	0.638841	-0.0530468	-0.0530468	TSS	YKL017C
CCE1:chrXI_421239_G_T	0.130999	0.394428	-0.0743458	-0.0743458	TSS	YKL011C
SFT1:chrXI_430806_A_T	0.380483	0.671375	0.0605765	0.0605765	TSS	YKL006C-A
AUR1:chrXI_435084_G_A	0.00984108	0.089981	0.127797	0.127797	TSS	YKL004W
OSH6:chrXI_445153_G_C	0.168647	0.479905	0.111079	0.111079	Upstream	YKR003W
YPT52:chrXI_466269_T_A	0.00464858	0.0544728	-0.269146	-0.269146	TSS	YKR014C
YKR015C:chrXI_469378_GA_GAA	0.610448	0.836437	-0.0398754	-0.0398754	TSS	YKR015C
YKR015C:chrXI_469423_C_T	0.0510165	0.256749	0.251351	0.251351	Upstream	YKR015C
HEL1:chrXI_473465_A_G	0.59631	0.82651	0.0399525	0.0399525	TSS	YKR017C
HEL1:chrXI_473531_G_T	0.13672	0.402079	-0.129238	-0.129238	TSS	YKR017C
DBP7:chrXI_487439_A_G	0.0503076	0.237086	-1.10079	-1.10079	TSS	YKR024C
RPC37:chrXI_487626_C_T	0.747767	0.897024	0.0486834	0.0486834	TSS	YKR025W
RPC37:chrXI_487631_G_A	0.156821	0.432683	-0.210002	-0.210002	TSS	YKR025W
GCN3:chrXI_489841_T_TAA	0.926186	0.974004	-0.0282484	-0.0282484	TSS	YKR026C
BCH2:chrXI_491233_A_C	0.268938	0.56942	0.510141	0.510141	TSS	YKR027W
GMH1:chrXI_500101_A_G	0.854534	0.941458	-0.0149111	-0.0149111	TSS	YKR030W
GMH1:chrXI_500136_C_A	0.288418	0.584345	-0.110309	-0.110309	TSS	YKR030W
DID2:chrXI_507844_A_G	0.854687	0.952043	-0.0201988	-0.0201988	Upstream	YKR035W-A
SPC34:chrXI_511838_A_T	0.512713	0.765086	-0.135381	-0.135381	TSS	YKR037C
SPC34:chrXI_511926_T_A	0.50691	0.761243	-0.102237	-0.102237	TSS	YKR037C
GAP1:chrXI_514873_G_A	0.459112	0.730393	0.119971	0.119971	TSS	YKR039W
YKR045C:chrXI_524060_G_A	0.572379	0.807611	-0.179185	-0.179185	TSS	YKR045C
PET10:chrXI_525215_TATTATTATC_T	0.117348	0.373059	-0.0590123	-0.0590123	TSS	YKR046C
YKR051W:chrXI_530688_GAA_G	0.0187053	0.145488	-0.277072	-0.277072	Upstream	YKR051W
YSR3:chrXI_535579_G_T	6.18074e-10	9.37928e-08	-0.550043	-0.550043	TSS	YKR053C
RHO4:chrXI_548064_C_T	0.108495	0.379723	-0.13182	-0.13182	Upstream	YKR055W
RHO4:chrXI_548122_G_A	0.34925	0.646348	-0.119044	-0.119044	TSS	YKR055W
KTR2:chrXI_557500_A_G	0.157252	0.433086	-0.185837	-0.185837	TSS	YKR061W
TFA2:chrXI_559595_G_A	0.00210002	0.0313969	-0.124614	-0.124614	TSS	YKR062W
LAS1:chrXI_562348_A_G	0.646264	0.851677	0.0594387	0.0594387	TSS	YKR063C
OAF3:chrXI_562426_T_C	0.0204491	0.143664	-0.158706	-0.158706	TSS	YKR064W
OAF3:chrXI_562470_G_T	0.055337	0.248443	-0.134776	-0.134776	TSS	YKR064W
CCP1:chrXI_567277_T_C	2.36295e-05	0.000969129	-0.316926	-0.316926	TSS	YKR066C
BET3:chrXI_571008_T_C	0.0501242	0.236589	-0.146648	-0.146648	TSS	YKR068C
BET3:chrXI_571051_G_A	0.147436	0.446308	0.190809	0.190809	Upstream	YKR068C
MET1:chrXI_571323_C_T	0.0120557	0.111216	0.229419	0.229419	Upstream	YKR069W
MET1:chrXI_571329_A_G	0.0289321	0.171167	0.332651	0.332651	TSS	YKR069W
DRE2:chrXI_576163_GA_G	0.358261	0.655013	-0.0890639	-0.0890639	TSS	YKR071C
DRE2:chrXI_576172_GA_G	0.650632	0.852763	-0.0441719	-0.0441719	TSS	YKR071C
TRZ1:chrXI_589512_C_A	0.000371182	0.00977314	-0.385486	-0.385486	Upstream	YKR079C
TRZ1:chrXI_589534_G_C	0.368337	0.662559	0.0872998	0.0872998	TSS	YKR079C
TRZ1:chrXI_589580_G_T	0.113549	0.368186	0.166029	0.166029	TSS	YKR079C
MTD1:chrXI_590322_A_G	0.489129	0.751268	0.118061	0.118061	TSS	YKR080W
RPF2:chrXI_592577_A_G	0.127183	0.386387	0.244462	0.244462	TSS	YKR081C
RPF2:chrXI_592615_T_C	0.196995	0.519699	-0.156714	-0.156714	Upstream	YKR081C
RPF2:chrXI_592616_C_G	0.83859	0.949015	0.0223123	0.0223123	Upstream	YKR081C
DAD2:chrXI_596996_G_A	0.481465	0.74524	0.0661431	0.0661431	TSS	YKR083C
DAD2:chrXI_596999_A_AT	0.477903	0.745005	-0.0592813	-0.0592813	TSS	YKR083C
MRPL20:chrXI_599778_G_A	0.58848	0.840498	0.0759541	0.0759541	Upstream	YKR085C
MRPL20:chrXI_599836_G_T	0.905585	0.96982	0.0136087	0.0136087	Upstream	YKR085C
OMA1:chrXI_604356_A_G	0.000201472	0.00634068	-0.476338	-0.476338	Upstream	YKR087C
TGL4:chrXI_608448_C_T	0.000622936	0.0120265	0.152503	0.152503	TSS	YKR089C
TGL4:chrXI_608493_C_T	0.267223	0.601926	0.132822	0.132822	Upstream	YKR089C
TGL4:chrXI_608546_G_A	4.92547e-07	0.00011006	-0.675015	-0.675015	Upstream	YKR089C
PXL1:chrXI_608639_A_G	0.0777441	0.309903	0.134893	0.134893	Upstream	YKR090W
PXL1:chrXI_608641_G_A	0.173873	0.484437	0.120425	0.120425	Upstream	YKR090W
PXL1:chrXI_608676_T_C	0.0202942	0.151664	1.05654	1.05654	Upstream	YKR090W
TGL4:chrXI_608679_C_T	0.000199904	0.00633596	0.34572	0.34572	Upstream	YKR089C
PXL1:chrXI_608711_A_T	0.171842	0.482416	0.117409	0.117409	Upstream	YKR090W
TGL4:chrXI_608767_T_A	0.150293	0.448781	0.167808	0.167808	Upstream	YKR089C
SRL3:chrXI_611427_G_A	0.0328999	0.18491	0.158227	0.158227	TSS	YKR091W
SRP40:chrXI_613967_AT_ATT	0.78924	0.930882	0.0466039	0.0466039	Upstream	YKR092C
SRP40:chrXI_613990_G_GAAAAAA	0.131001	0.417508	0.155111	0.155111	Upstream	YKR092C
PTR2:chrXI_615578_T_C	0.0395652	0.222691	0.627627	0.627627	Upstream	YKR093W
GTT2:chrXII_22201_A_G	0.666973	0.865086	-0.0335354	-0.0335354	TSS	YLL060C
YLL058W:chrXII_23505_A_G	0.0352725	0.193584	-0.479457	-0.479457	TSS	YLL058W
YLL056C:chrXII_29612_A_G	2.38143e-07	6.65163e-05	0.850128	0.850128	Upstream	YLL056C
YCT1:chrXII_29739_GA_G	0.132893	0.396496	-0.123902	-0.123902	TSS	YLL055W
YCT1:chrXII_29773_C_A	0.011988	0.111216	-0.590084	-0.590084	Upstream	YLL055W
YCT1:chrXII_29781_T_G	0.486193	0.790033	0.0964149	0.0964149	Upstream	YLL055W
RPL8B:chrXII_48673_TAA_TA	0.102443	0.349733	-0.193626	-0.193626	TSS	YLL045C
ATG10:chrXII_52687_A_G	0.010698	0.103548	0.336649	0.336649	Upstream	YLL042C
UBI4:chrXII_65441_G_C	0.033994	0.204912	0.368228	0.368228	Upstream	YLL039C
ENT4:chrXII_66595_A_G	0.590877	0.824153	-0.136617	-0.136617	TSS	YLL038C
UBI4:chrXII_65517_T_C	0.350742	0.684641	0.149509	0.149509	Upstream	YLL039C
UBI4:chrXII_65523_A_T	0.0397761	0.222756	-0.287457	-0.287457	Upstream	YLL039C
UBI4:chrXII_65534_AT_ATT	0.762959	0.922329	-0.0488465	-0.0488465	Upstream	YLL039C
GRC3:chrXII_68368_T_A	0.0227442	0.153057	-0.431897	-0.431897	TSS	YLL035W
GRC3:chrXII_68373_A_T	0.00419914	0.0516433	-0.59593	-0.59593	TSS	YLL035W
IRC19:chrXII_73290_C_A	0.0835473	0.30859	0.114524	0.114524	TSS	YLL033W
IRC19:chrXII_73366_T_C	0.605434	0.832952	0.0380938	0.0380938	TSS	YLL033W
FRA1:chrXII_81240_C_T	0.0120946	0.111216	0.453802	0.453802	Upstream	YLL029W
HSP104:chrXII_88452_G_A	0.0246473	0.166892	-0.326159	-0.326159	Upstream	YLL026W
PAU17:chrXII_94650_G_A	0.714882	0.884612	-0.101611	-0.101611	TSS	YLL025W
PAU17:chrXII_94681_C_T	0.00536855	0.0592493	0.598904	0.598904	TSS	YLL025W
SSA2:chrXII_97559_T_C	0.0486877	0.250674	0.269876	0.269876	Upstream	YLL024C
SSA2:chrXII_97599_C_T	0.00295524	0.0400408	-0.534827	-0.534827	TSS	YLL024C
SSA2:chrXII_97654_A_C	0.00521194	0.0587803	0.644903	0.644903	TSS	YLL024C
COX19:chrXII_109073_T_A	0.716889	0.885535	0.026735	0.026735	TSS	YLL018C-A
COX19:chrXII_109155_A_G	0.145386	0.414605	0.124848	0.124848	TSS	YLL018C-A
DPS1:chrXII_111590_CT_C	0.460192	0.730907	0.0368424	0.0368424	TSS	YLL018C
EMC6:chrXII_121206_T_G	0.118501	0.397882	-0.210303	-0.210303	Upstream	YLL014W
PUF3:chrXII_124986_GT_G	1.98796e-05	0.000837982	-0.173956	-0.173956	TSS	YLL013C
SOF1:chrXII_127406_C_CT	0.689643	0.875922	0.0219307	0.0219307	TSS	YLL011W
SOF1:chrXII_127407_AT_TT	0.872372	0.950516	0.00888724	0.00888724	TSS	YLL011W
SOF1:chrXII_127478_C_T	0.287148	0.583126	0.0555459	0.0555459	TSS	YLL011W
SOF1:chrXII_127487_T_C	0.00125906	0.0212292	-0.240781	-0.240781	TSS	YLL011W
PSR1:chrXII_130903_CT_C	0.821037	0.931184	-0.0382043	-0.0382043	TSS	YLL010C
PSR1:chrXII_130928_GA_G	0.488326	0.750415	-0.108646	-0.108646	TSS	YLL010C
MMM1:chrXII_136433_AT_A	0.135801	0.40054	-0.135916	-0.135916	TSS	YLL006W
MMM1:chrXII_136527_T_C	0.0160425	0.121253	-0.179305	-0.179305	TSS	YLL006W
ORC3:chrXII_140997_T_C	0.188197	0.474005	-0.500678	-0.500678	TSS	YLL004W
THI73:chrXII_159671_C_G	0.628711	0.846181	0.0534631	0.0534631	TSS	YLR004C
POM34:chrXII_179752_A_AT	0.138924	0.405417	0.166012	0.166012	TSS	YLR018C
POM34:chrXII_179902_T_C	0.000528361	0.0128257	0.456217	0.456217	Upstream	YLR018C
SDO1:chrXII_184955_C_T	0.737998	0.894288	0.0281884	0.0281884	TSS	YLR022C
SNF7:chrXII_194277_T_C	0.701951	0.887962	0.0339772	-0.0773718	Upstream	YLR025W
SED5:chrXII_196591_ATTT_ATT	0.103628	0.367841	-0.133577	-0.133577	Upstream	YLR026C
SED5:chrXII_196695_C_T	0.032315	0.199194	0.336516	0.336516	Upstream	YLR026C
PDC1:chrXII_234144_G_A	0.692462	0.877138	-0.0490026	-0.0490026	TSS	YLR044C
PDC1:chrXII_234177_C_G	0.212633	0.504568	0.145855	0.145855	TSS	YLR044C
STU2:chrXII_237728_A_G	0.0711307	0.283951	0.118461	0.118461	TSS	YLR045C
STU2:chrXII_237814_C_T	0.102207	0.364473	-0.312755	0.12435	Upstream	YLR045C
FRE8:chrXII_241720_T_C	0.427889	0.708629	0.0666244	0.0666244	TSS	YLR047C
FRE8:chrXII_241757_A_G	0.919525	0.969687	0.00826984	0.00826984	TSS	YLR047C
YLR049C:chrXII_245473_G_A	0.000227936	0.00707392	-0.564366	-0.564366	Upstream	YLR049C
YLR049C:chrXII_245489_A_G	0.184077	0.466944	0.149854	0.149854	TSS	YLR049C
YLR050C:chrXII_246098_G_C	5.03447e-08	4.36561e-06	-0.340613	-0.340613	TSS	YLR050C
YLR050C:chrXII_246208_AG_A	9.0095e-05	0.002762	0.20012	0.20012	TSS	YLR050C
YLR050C:chrXII_246211_T_A	0.50718	0.798514	-0.0476798	-0.0476798	Upstream	YLR050C
IES3:chrXII_247009_A_C	0.668445	0.883811	0.0613458	0.0613458	Upstream	YLR052W
IES3:chrXII_247140_T_C	0.168112	0.450326	-0.0942708	-0.0942708	TSS	YLR052W
YLR053C:chrXII_248521_CAT_C	1.20721e-06	0.000199815	-2.03762	-2.03762	Upstream	YLR053C
YLR053C:chrXII_248559_G_T	0.103381	0.367258	0.142657	0.142657	Upstream	YLR053C
ERG3:chrXII_253770_T_C	0.127039	0.412599	0.128189	0.128189	Upstream	YLR056W
MNL2:chrXII_255134_T_C	0.451075	0.722815	0.0764083	0.0764083	TSS	YLR057W
SHM2:chrXII_259471_G_T	0.0344807	0.190618	1.46954	1.46954	TSS	YLR058C
REX2:chrXII_260584_C_CT	0.0109649	0.10493	0.335513	0.335513	Upstream	YLR059C
REX2:chrXII_260593_C_T	0.52997	0.809168	-0.0952044	-0.0952044	Upstream	YLR059C
FRS1:chrXII_260852_A_G	0.0197729	0.150422	0.277696	0.277696	Upstream	YLR060W
RPL22A:chrXII_263050_CA_C	0.798579	0.934499	0.0221877	0.0221877	Upstream	YLR061W
RPL22A:chrXII_263076_T_C	0.6178	0.85984	-0.0493527	-0.0493527	Upstream	YLR061W
RPL22A:chrXII_263103_C_T	0.0571034	0.26891	-0.301169	-0.301169	Upstream	YLR061W
PER33:chrXII_265286_C_G	0.934034	0.981038	0.00945688	0.00945688	Upstream	YLR064W
ENV10:chrXII_266966_C_T	0.00101897	0.0183531	0.399764	0.399764	TSS	YLR065C
ENV10:chrXII_266973_G_A	0.40236	0.692182	0.102238	0.102238	TSS	YLR065C
PET309:chrXII_270839_A_G	0.78391	0.913834	0.016847	0.016847	TSS	YLR067C
MEF1:chrXII_274041_A_G	0.70703	0.882788	-0.108056	-0.108056	TSS	YLR069C
MEF1:chrXII_274059_AATAT_A	0.583347	0.815879	-0.145385	-0.145385	TSS	YLR069C
RFU1:chrXII_281805_A_AG	0.637832	0.849045	0.0289008	0.0289008	TSS	YLR073C
RFU1:chrXII_281809_A_ATTT	0.753427	0.90074	0.0197239	0.0197239	TSS	YLR073C
RFU1:chrXII_281816_C_T	0.11852	0.373703	-0.136419	-0.136419	TSS	YLR073C
BUD20:chrXII_282495_A_T	0.210669	0.502262	-0.0939161	-0.0939161	TSS	YLR074C
BUD20:chrXII_282505_C_T	0.684556	0.87332	0.0378074	0.0378074	TSS	YLR074C
BUD20:chrXII_282557_A_T	0.230511	0.562312	-0.284825	-0.284825	Upstream	YLR074C
BUD20:chrXII_282562_C_CT	0.273711	0.572376	-0.0906175	-0.0906175	TSS	YLR074C
RPL10:chrXII_282769_C_G	0.00704506	0.0722356	0.231879	0.231879	TSS	YLR075W
FMP25:chrXII_283710_T_C	0.692862	0.877279	0.0494374	0.0494374	TSS	YLR077W
FMP25:chrXII_283719_G_A	0.0191114	0.137774	-0.39702	-0.39702	TSS	YLR077W
FMP25:chrXII_283720_C_A	0.0438486	0.22173	0.339136	0.339136	TSS	YLR077W
FMP25:chrXII_283731_G_A	0.137463	0.403321	0.197276	0.197276	TSS	YLR077W
FMP25:chrXII_283746_G_T	0.0552374	0.248375	0.291473	0.291473	TSS	YLR077W
FMP25:chrXII_283794_C_T	0.0808377	0.304398	0.254239	0.254239	TSS	YLR077W
BOS1:chrXII_286729_C_T	0.115819	0.370791	-0.128719	-0.128719	TSS	YLR078C
GAL2:chrXII_290058_A_T	0.393653	0.685056	-0.0532061	-0.0532061	TSS	YLR081W
SMC4:chrXII_302144_T_C	0.0253956	0.161923	-0.117907	-0.117907	TSS	YLR086W
IOC2:chrXII_332157_A_T	0.429711	0.709174	0.053552	0.053552	TSS	YLR095C
CHA4:chrXII_339496_G_A	0.875869	0.951639	-0.01494	-0.01494	TSS	YLR098C
CHA4:chrXII_339567_G_A	0.742396	0.895433	0.0333036	0.0333036	TSS	YLR098C
ERG27:chrXII_341688_T_A	0.187209	0.504735	-0.160758	-0.160758	Upstream	YLR100W
YLR111W:chrXII_370156_G_A	0.518355	0.804629	-0.0674805	-0.0674805	Upstream	YLR111W
CCW12:chrXII_370176_A_T	0.376163	0.708715	-0.102645	-0.102645	Upstream	YLR110C
YLR118C:chrXII_385575_GAA_G	0.0221962	0.151044	0.608785	0.608785	TSS	YLR118C
YPS1:chrXII_388450_A_T	0.847227	0.941458	0.0245782	0.0245782	TSS	YLR120C
YPS1:chrXII_388456_C_T	0.708034	0.882788	-0.0558886	-0.0558886	TSS	YLR120C
RKM5:chrXII_416876_C_G	0.647663	0.85216	-0.0487078	-0.0487078	TSS	YLR137W
RKM5:chrXII_416918_G_A	0.173026	0.454268	0.151681	0.151681	TSS	YLR137W
NHA1:chrXII_418313_A_G	0.026812	0.168127	-0.161602	-0.161602	TSS	YLR138W
PCD1:chrXII_442873_G_A	0.864156	0.945122	-0.0455532	-0.0455532	TSS	YLR151C
YLR152C:chrXII_444929_T_C	0.0893462	0.321058	0.252977	0.252977	TSS	YLR152C
PUS5:chrXII_495314_T_TC	0.245733	0.541613	-0.138406	-0.138406	TSS	YLR165C
PUS5:chrXII_495344_A_C	0.995237	0.997208	-0.000710827	-0.000710827	TSS	YLR165C
UPS2:chrXII_500366_C_T	0.158439	0.43517	-0.0548829	-0.0548829	TSS	YLR168C
UPS2:chrXII_500416_C_G	0.661773	0.862194	0.0188919	0.0188919	TSS	YLR168C
UPS2:chrXII_500417_C_G	0.763287	0.904481	-0.0139016	-0.0139016	TSS	YLR168C
APS1:chrXII_501110_A_G	0.178951	0.463806	-0.094945	-0.094945	TSS	YLR170C
APS1:chrXII_501203_G_T	0.376923	0.668982	-0.0526171	-0.0526171	TSS	YLR170C
DPH5:chrXII_502281_G_A	0.303624	0.614242	0.496859	0.116177	Upstream	YLR172C
YLR173W:chrXII_502331_G_A	0.0605809	0.262715	0.369813	0.369813	TSS	YLR173W
YLR173W:chrXII_502343_G_A	0.00450043	0.0531471	0.541033	0.541033	TSS	YLR173W
YLR173W:chrXII_502353_A_G	0.0530635	0.259517	0.134765	0.134765	Upstream	YLR173W
CBF5:chrXII_506065_G_GTT	0.662783	0.862606	-0.0976568	-0.0976568	TSS	YLR175W
YLR177W:chrXII_510901_C_T	1.16898e-09	1.54255e-07	0.467463	0.467463	TSS	YLR177W
TFS1:chrXII_513896_GC_G	0.890601	0.963704	0.0111365	0.0111365	Upstream	YLR178C
TFS1:chrXII_513997_CAA_C	0.0526446	0.259277	0.484962	0.484962	Upstream	YLR178C
YLR179C:chrXII_514832_G_A	0.403335	0.73399	-0.0885565	-0.0885565	Upstream	YLR179C
SAM1:chrXII_514845_A_C	0.00311237	0.0473101	0.268783	0.268783	Upstream	YLR180W
YLR179C:chrXII_514922_G_A	0.969652	0.989355	0.00472071	0.00472071	Upstream	YLR179C
SAM1:chrXII_515081_C_A	0.0290991	0.17182	-0.104132	-0.104132	TSS	YLR180W
SAM1:chrXII_515195_GAA_GA	0.01987	0.150763	0.243783	0.243783	Upstream	YLR180W
VTA1:chrXII_517747_T_C	0.0202841	0.151664	-0.292766	-0.292766	Upstream	YLR181C
SWI6:chrXII_517820_A_G	0.133953	0.398575	0.181668	0.181668	TSS	YLR182W
VTA1:chrXII_517835_T_TAA	0.0303001	0.190184	-0.245655	-0.245655	Upstream	YLR181C
SWI6:chrXII_517892_TAAA_TAA	0.333799	0.670695	-0.0895458	-0.0895458	Upstream	YLR182W
RPL37A:chrXII_522608_A_G	0.0280447	0.169216	-0.609898	-0.609898	TSS	YLR185W
MDL1:chrXII_528191_T_A	0.189393	0.474005	0.10304	0.10304	TSS	YLR188W
HCR1:chrXII_539743_G_GA	0.181375	0.465321	0.0989833	0.0989833	TSS	YLR192C
PWP1:chrXII_543764_C_CTA	0.0463653	0.227541	0.498843	0.498843	TSS	YLR196W
PBA1:chrXII_548902_GA_G	0.28724	0.583126	-0.0933198	-0.0933198	TSS	YLR199C
HRD3:chrXII_556749_C_G	0.917213	0.968031	-0.00667856	-0.00667856	TSS	YLR207W
PNP1:chrXII_561785_T_G	0.287169	0.583126	0.0380896	0.0380896	TSS	YLR209C
CDC123:chrXII_572011_G_A	0.0414481	0.216888	0.23214	0.23214	TSS	YLR215C
BNA5:chrXII_607171_G_A	0.0242647	0.157695	-0.208905	-0.208905	TSS	YLR231C
BNA5:chrXII_607200_G_A	0.00040121	0.00851519	-0.514981	-0.514981	TSS	YLR231C
EST1:chrXII_609589_G_T	0.632791	0.84679	0.0624315	0.0624315	TSS	YLR233C
EST1:chrXII_609627_T_C	0.0748798	0.292108	-0.208183	-0.208183	TSS	YLR233C
TOP3:chrXII_609688_C_T	0.275037	0.573702	0.0935099	0.0935099	TSS	YLR234W
THI7:chrXII_612158_GAAA_GA	0.170822	0.481736	0.131865	0.131865	Upstream	YLR237W
THI7:chrXII_612162_A_G	0.0883961	0.334498	0.25459	0.25459	Upstream	YLR237W
YLR235C:chrXII_612183_A_G	0.00413503	0.0575684	0.597603	0.597603	Upstream	YLR235C
THI7:chrXII_612202_A_G	0.130843	0.417508	-0.254213	-0.254213	Upstream	YLR237W
THI7:chrXII_612238_C_T	0.56376	0.830677	-0.0976435	-0.0976435	Upstream	YLR237W
VPS34:chrXII_617372_A_T	4.51058e-05	0.00162971	0.356132	0.356132	TSS	YLR240W
ERF2:chrXII_627007_T_C	0.705571	0.882788	-0.0199983	-0.0199983	TSS	YLR246W
YEF3:chrXII_636684_A_T	0.493563	0.792574	-0.0984165	-0.0984165	Upstream	YLR249W
YEF3:chrXII_636690_T_A	0.0020497	0.0355043	-0.257306	-0.257306	Upstream	YLR249W
NDL1:chrXII_645078_C_T	0.33513	0.633325	0.0729675	0.0729675	TSS	YLR254C
YLR257W:chrXII_658599_G_T	0.00762099	0.0763357	0.398292	0.398292	TSS	YLR257W
GSY2:chrXII_660622_A_T	0.479586	0.785569	0.108696	0.108696	Upstream	YLR258W
TMA7:chrXII_669715_GGAA_G	0.411207	0.697824	-0.0564345	-0.0564345	TSS	YLR262C-A
RPS28B:chrXII_672979_A_AT	0.155855	0.455834	0.433534	0.433534	Upstream	YLR264W
RPS28B:chrXII_673080_T_C	0.981364	0.994656	-0.00494182	-0.00494182	TSS	YLR264W
RPS28B:chrXII_673090_T_C	0.512461	0.765086	0.161	0.161	TSS	YLR264W
SEC22:chrXII_680023_A_AT	0.0215076	0.155782	0.269901	0.269901	Upstream	YLR268W
DCS1:chrXII_680974_A_G	0.00179499	0.0282625	0.20663	0.20663	TSS	YLR270W
DCS1:chrXII_680988_AC_A	0.0167163	0.125269	0.171964	0.171964	TSS	YLR270W
YLR271W:chrXII_682248_A_C	0.000919232	0.0168508	-0.372999	-0.372999	TSS	YLR271W
MCM5:chrXII_691332_A_T	0.0184756	0.144854	0.354147	0.354147	Upstream	YLR274W
SMD2:chrXII_694211_C_T	0.978853	0.994032	-0.000981911	-0.000981911	TSS	YLR275W
SMD2:chrXII_694318_C_T	0.0309341	0.177476	0.111243	0.111243	TSS	YLR275W
DBP9:chrXII_696960_A_AATGAG	0.697373	0.879322	-0.0335755	-0.0335755	TSS	YLR276C
DBP9:chrXII_696990_T_C	0.0705229	0.283397	-0.149787	-0.149787	TSS	YLR276C
YLR283W:chrXII_705093_C_T	0.415044	0.700095	-0.0639671	-0.0639671	TSS	YLR283W
YLR283W:chrXII_705096_A_T	0.754161	0.901134	0.0240296	0.0240296	TSS	YLR283W
YLR283W:chrXII_705118_T_C	0.0185242	0.1345	-0.161788	-0.161788	TSS	YLR283W
YLR283W:chrXII_705128_A_G	0.0235368	0.155558	-0.190818	-0.190818	TSS	YLR283W
ECI1:chrXII_707098_T_C	0.561137	0.828238	-0.0634442	-0.0634442	Upstream	YLR284C
ECI1:chrXII_707302_C_T	0.370618	0.704031	0.085154	0.085154	Upstream	YLR284C
CTS1:chrXII_710407_GT_G	0.849038	0.950251	0.016212	0.016212	Upstream	YLR286C
CTS1:chrXII_710493_A_T	0.16188	0.46855	0.143276	0.143276	Upstream	YLR286C
YLR286W-A:chrXII_708383_A_T	0.00428904	0.0518615	0.207587	0.207587	TSS	YLR286W-A
YLR287C:chrXII_712134_T_C	0.0632801	0.281392	-0.172147	-0.172147	Upstream	YLR287C
YLR287C:chrXII_712186_GTT_GTTTT	0.409201	0.697319	-0.0530423	-0.0530423	TSS	YLR287C
RPS30A:chrXII_713180_G_T	0.00813512	0.0793893	0.605419	0.605419	TSS	YLR287C-A
RPS30A:chrXII_713307_ATT_A	0.851548	0.941458	0.0330458	0.0330458	TSS	YLR287C-A
RPS30A:chrXII_713312_T_A	0.941742	0.980379	-0.0154581	-0.0154581	TSS	YLR287C-A
MEC3:chrXII_714966_G_C	0.977661	0.993902	0.00188485	0.00188485	TSS	YLR288C
YLR290C:chrXII_718104_G_A	0.00474207	0.0644144	0.308304	0.308304	Upstream	YLR290C
YLR290C:chrXII_718114_TAA_TAAAAAA	0.159104	0.462913	-0.197581	-0.197581	Upstream	YLR290C
GCD7:chrXII_719509_T_C	0.017961	0.131224	-0.17724	-0.17724	TSS	YLR291C
GCD7:chrXII_719533_GT_G	0.0394079	0.210466	-0.14052	-0.14052	TSS	YLR291C
GCD7:chrXII_719618_A_G	0.249363	0.584989	0.103103	0.103103	Upstream	YLR291C
YLR296W:chrXII_722593_T_C	0.261735	0.560138	0.0801354	0.0801354	TSS	YLR296W
YLR296W:chrXII_722617_A_G	0.0866207	0.314843	-0.118263	-0.118263	TSS	YLR296W
YLR296W:chrXII_722657_G_T	0.645584	0.851597	0.033585	0.033585	TSS	YLR296W
YHC1:chrXII_725538_C_T	0.126151	0.385501	-0.0748089	-0.0748089	TSS	YLR298C
YHC1:chrXII_725542_A_G	0.430581	0.7503	0.0738508	0.0738508	Upstream	YLR298C
EXG1:chrXII_728727_C_G	0.123906	0.40757	-0.114948	-0.114948	Upstream	YLR300W
HRI1:chrXII_730685_C_T	4.56759e-05	0.0016309	0.214721	0.214721	TSS	YLR301W
HRI1:chrXII_730719_C_A	0.432353	0.711206	-0.0394689	-0.0394689	TSS	YLR301W
HRI1:chrXII_730778_G_A	0.0542067	0.247474	0.0855162	0.0855162	TSS	YLR301W
MET17:chrXII_732435_G_A	0.544797	0.818119	-0.104369	-0.104369	Upstream	YLR303W
CDA1:chrXII_745460_A_G	0.776197	0.912378	-0.0357897	-0.0357897	TSS	YLR307W
CDA1:chrXII_745464_G_A	0.93446	0.977961	-0.00909964	-0.00909964	TSS	YLR307W
IMH1:chrXII_751824_C_T	0.0726324	0.286513	0.117032	0.117032	TSS	YLR309C
IMH1:chrXII_751827_A_G	0.244146	0.540074	0.0909958	0.0909958	TSS	YLR309C
IMH1:chrXII_751890_G_A	0.844069	0.940441	-0.0152756	-0.0152756	TSS	YLR309C
MRPL15:chrXII_759341_GA_G	0.291976	0.627932	-0.141033	-0.141033	Upstream	YLR312W-A
SPH1:chrXII_762443_C_A	0.960101	0.989106	-0.00451178	-0.00451178	TSS	YLR313C
SPH1:chrXII_762492_A_G	0.069218	0.281188	0.148977	0.148977	TSS	YLR313C
NKP2:chrXII_764614_A_G	0.146034	0.414605	0.102059	0.102059	TSS	YLR315W
NKP2:chrXII_764623_T_C	0.278285	0.574945	-0.0734454	-0.0734454	TSS	YLR315W
BUD6:chrXII_771882_A_AAGTC	0.00899665	0.0934768	0.491037	0.491037	Upstream	YLR319C
YLR326W:chrXII_782002_A_G	0.939733	0.981038	-0.00779538	-0.00779538	Upstream	YLR326W
TMA10:chrXII_783530_T_C	0.143578	0.412985	0.106684	0.106684	TSS	YLR327C
CHS5:chrXII_787510_A_C	0.321007	0.659578	-0.0782256	-0.0782256	Upstream	YLR330W
RPS25B:chrXII_796413_T_A	0.0764733	0.296041	-0.177886	-0.177886	TSS	YLR333C
RPS25B:chrXII_796439_A_G	0.135541	0.40054	-0.147264	-0.147264	TSS	YLR333C
NUP2:chrXII_797270_G_A	0.472437	0.741006	0.0439663	0.0439663	TSS	YLR335W
SGD1:chrXII_802510_T_A	0.540973	0.815326	0.0936054	0.0936054	Upstream	YLR336C
VRP1:chrXII_805190_A_G	4.04305e-06	0.000235974	0.771033	0.771033	TSS	YLR337C
RPP0:chrXII_805710_G_A	0.0237819	0.15623	-0.111031	-0.111031	TSS	YLR340W
YLR345W:chrXII_820297_G_A	0.937422	0.978698	0.00396056	0.00396056	TSS	YLR345W
YLR346C:chrXII_822750_C_T	0.0249389	0.160696	0.254648	0.254648	TSS	YLR346C
YLR346C:chrXII_822768_A_C	0.291203	0.58646	0.0905572	0.0905572	TSS	YLR346C
KAP95:chrXII_826674_C_T	0.747752	0.917809	-0.0402718	-0.0402718	Upstream	YLR347C
DIC1:chrXII_827961_TCC_T	0.889861	0.963564	0.028675	0.028675	Upstream	YLR348C
DIC1:chrXII_827963_CAT_CATATAT	0.283131	0.618432	-0.175334	-0.175334	Upstream	YLR348C
ORM2:chrXII_828578_G_T	0.14352	0.439415	-0.202568	-0.202568	Upstream	YLR350W
ORM2:chrXII_828622_T_G	0.122846	0.405165	0.239549	0.239549	Upstream	YLR350W
NIT3:chrXII_830507_C_A	0.664688	0.881783	0.0333516	0.0333516	Upstream	YLR351C
YLR352W:chrXII_830508_C_T	0.420184	0.743145	0.0754563	0.0754563	Upstream	YLR352W
YLR352W:chrXII_830945_C_T	0.0273036	0.179441	0.28957	0.28957	Upstream	YLR352W
YLR352W:chrXII_830954_A_C	0.52981	0.809168	-0.0933629	-0.0933629	Upstream	YLR352W
YLR352W:chrXII_830981_T_C	0.096568	0.350864	-0.205193	-0.205193	Upstream	YLR352W
BUD8:chrXII_833859_A_G	0.255308	0.590278	-0.126276	-0.126276	Upstream	YLR353W
TAL1:chrXII_837460_A_G	0.360387	0.693613	-0.0997006	-0.0997006	Upstream	YLR354C
ILV5:chrXII_840217_T_C	0.284039	0.619206	0.0950779	0.0950779	Upstream	YLR355C
ADE13:chrXII_844038_T_C	0.619857	0.841112	0.039859	0.039859	TSS	YLR359W
DCR2:chrXII_849160_C_A	0.108854	0.361919	0.394072	0.394072	TSS	YLR361C
DCR2:chrXII_849244_T_A	0.283062	0.580077	0.25254	0.25254	TSS	YLR361C
RPS22B:chrXII_855718_G_C	0.0116086	0.100002	0.168465	0.168465	TSS	YLR367W
RPS22B:chrXII_855738_A_AT	0.074116	0.290248	0.134522	0.134522	TSS	YLR367W
RPS22B:chrXII_855772_C_T	0.0700431	0.282687	0.129553	0.129553	TSS	YLR367W
MDM30:chrXII_857426_A_T	0.855479	0.941458	-0.0346887	-0.0346887	TSS	YLR368W
MDM30:chrXII_857477_T_C	0.202883	0.490637	-0.272667	-0.272667	TSS	YLR368W
ARC18:chrXII_862412_T_C	0.231386	0.562879	-0.0960312	-0.0960312	Upstream	YLR370C
VID22:chrXII_871484_C_T	0.0207126	0.153789	-0.675744	-0.675744	Upstream	YLR373C
VID22:chrXII_871504_A_G	0.0710937	0.300017	0.504189	0.504189	Upstream	YLR373C
STP3:chrXII_871646_G_T	0.141138	0.408805	0.125233	0.125233	TSS	YLR375W
NAM2:chrXII_885068_C_T	0.209908	0.535738	-0.108499	-0.108499	Upstream	YLR382C
VAC14:chrXII_893464_T_A	0.00571808	0.0717812	0.297678	0.297678	Upstream	YLR386W
RPS29A:chrXII_898044_G_A	0.204587	0.493185	0.075312	0.075312	TSS	YLR388W
RPS29A:chrXII_898119_G_A	0.00891237	0.0841994	-0.162904	-0.162904	TSS	YLR388W
ECM19:chrXII_902761_G_A	0.00965297	0.0893194	-0.535398	-0.535398	TSS	YLR390W
VPS33:chrXII_912464_A_G	0.00834668	0.0904838	0.232552	0.232552	Upstream	YLR396C
SKI2:chrXII_919181_T_C	0.265758	0.600553	0.118267	0.118267	Upstream	YLR398C
DUS3:chrXII_924556_T_C	0.0150422	0.117586	0.344224	0.344224	TSS	YLR401C
YLR407W:chrXII_932584_C_T	0.228104	0.559324	-0.0884557	-0.0884557	Upstream	YLR407W
CTR3:chrXII_947148_T_A	0.0437542	0.22173	-0.254432	-0.254432	TSS	YLR411W
YLR412C-A:chrXII_950788_T_C	0.258911	0.55827	0.251948	0.251948	TSS	YLR412C-A
YLR412C-A:chrXII_950793_G_A	0.985367	0.994057	0.00271284	0.00271284	Upstream	YLR412C-A
YLR412C-A:chrXII_950840_GA_GAA	0.336427	0.673911	-0.129722	-0.129722	Upstream	YLR412C-A
YLR412C-A:chrXII_950859_C_T	0.260713	0.560138	0.185326	0.185326	TSS	YLR412C-A
YLR412C-A:chrXII_951032_C_T	0.0627469	0.280697	-0.453113	-0.453113	Upstream	YLR412C-A
VPS36:chrXII_954827_T_C	0.172378	0.454268	-0.0891439	-0.0891439	TSS	YLR417W
VPS36:chrXII_954897_A_G	0.0395796	0.210744	0.136654	0.136654	TSS	YLR417W
CDC73:chrXII_958253_G_A	0.0388199	0.210015	0.187266	0.187266	TSS	YLR418C
YLR419W:chrXII_958334_A_G	0.0194369	0.139459	0.186292	0.186292	TSS	YLR419W
RPN13:chrXII_965658_G_A	0.53704	0.785134	0.0425753	0.0425753	TSS	YLR421C
TDA5:chrXII_986999_T_C	0.111131	0.364629	-0.47454	-0.47454	TSS	YLR426W
YLR428C:chrXII_991073_C_T	0.470036	0.739534	0.0542456	0.0542456	TSS	YLR428C
CNA1:chrXII_1006150_C_T	0.882722	0.952724	0.0483588	0.0483588	TSS	YLR433C
ECM30:chrXII_1011440_C_T	0.310368	0.604212	-0.2349	-0.2349	TSS	YLR436C
MRPL4:chrXII_1014332_C_T	0.121693	0.376912	0.0533879	0.0533879	TSS	YLR439W
SIR3:chrXII_1022329_G_A	0.240556	0.534863	-0.118474	-0.118474	TSS	YLR442C
YLR456W:chrXII_1054922_T_C	0.00211061	0.0314005	0.228206	0.228206	TSS	YLR456W
YLR456W:chrXII_1054954_GA_G	0.728057	0.889275	-0.0279783	-0.0279783	TSS	YLR456W
YLR456W:chrXII_1054968_C_G	4.35827e-06	0.000249573	0.31859	0.31859	TSS	YLR456W
ERO1:chrXIII_13364_C_T	0.0685018	0.294532	0.201746	0.201746	Upstream	YML130C
GTR1:chrXIII_26795_G_GAA	0.736997	0.894288	-0.0515796	-0.0515796	TSS	YML121W
GTR1:chrXIII_26816_GACCCT_G	0.709189	0.882788	-0.0480425	-0.0480425	TSS	YML121W
NDI1:chrXIII_29994_T_G	0.3513	0.648295	0.12854	0.12854	TSS	YML120C
NGL3:chrXIII_31828_G_A	0.25532	0.590278	-0.175495	-0.175495	Upstream	YML118W
ATR1:chrXIII_37977_T_G	0.00600705	0.0640702	0.354578	0.354578	TSS	YML116W
ATR1:chrXIII_38045_G_T	0.0598518	0.261071	-0.305794	-0.305794	TSS	YML116W
ATR1:chrXIII_38072_C_T	0.113115	0.367869	-0.214015	-0.214015	TSS	YML116W
DAT1:chrXIII_43866_CTT_CT	0.480255	0.745005	-0.161745	-0.161745	TSS	YML113W
TAF8:chrXIII_43908_A_ATT	0.0722746	0.301913	-0.369953	-0.369953	Upstream	YML114C
TAF8:chrXIII_43972_G_A	0.43497	0.753218	-0.176632	-0.176632	Upstream	YML114C
COQ5:chrXIII_51084_T_C	2.22091e-06	0.000291919	1.50869	1.50869	Upstream	YML110C
PML39:chrXIII_56291_G_C	0.742605	0.895433	0.0179157	0.0179157	TSS	YML107C
URA5:chrXIII_56362_G_A	0.725462	0.888556	0.0234537	0.0234537	TSS	YML106W
URA5:chrXIII_56369_T_C	0.114894	0.369773	-0.115409	-0.115409	TSS	YML106W
SEC65:chrXIII_58770_ATT_AT	0.983564	0.994915	-0.0018813	-0.0018813	TSS	YML105C
SEC65:chrXIII_58847_T_G	0.289	0.585133	-0.0888095	-0.0888095	TSS	YML105C
MDM1:chrXIII_62439_GA_GAA	0.479195	0.745005	-0.0611263	-0.0611263	TSS	YML104C
ARG81:chrXIII_77135_T_TA	0.4246	0.706116	0.121914	0.121914	TSS	YML099C
VPS9:chrXIII_79761_T_G	0.369592	0.662559	0.185446	0.185446	TSS	YML097C
YML096W:chrXIII_79783_T_C	0.0168336	0.136532	0.25639	0.25639	Upstream	YML096W
VPS9:chrXIII_79840_G_GA	0.0548997	0.247834	0.314619	0.314619	TSS	YML097C
VPS9:chrXIII_79850_A_G	0.0487924	0.232472	0.381317	0.381317	TSS	YML097C
UFO1:chrXIII_91587_G_A	0.205995	0.53063	-0.145635	-0.145635	Upstream	YML088W
UFO1:chrXIII_91597_G_A	0.0134587	0.119285	0.185952	0.185952	Upstream	YML088W
UFO1:chrXIII_91667_A_G	0.93764	0.981038	-0.0212629	-0.0212629	Upstream	YML088W
ALO1:chrXIII_97548_T_C	0.64156	0.850946	-0.0451067	-0.0451067	TSS	YML086C
[truncated: 3,833 more rows]
