# Supplementary material for: Massively parallel identification of causal variants underlying gene expression differences in a yeast cross
Source: bioRxiv preprint, doi:10.1101/2020.08.31.276337, version 1 (2020-08-31)
Supplement: Table S8 [file 276337_file10.xlsx]

## Sheet: variantResultsWithAnnotations
variantID	testName	logFC	AveExpr	t	P.Value	adj.P.Val	B	library	gene	otherGene_overlapsMainGene	numberOfGenes	SignificantGeneIsDesignedGene	strand	numberVarsInOligo	varPosInOligo	varNumberInOligo	chr	pos	ref	alt	SNP	delta_BP	delta_A	delta_C	delta_G	delta_T	delta_TATA	delta_ATG	populationFreq	expression	essential	dNdS	dNdS_adjust	PPI	GxGLenient	GxGIntermediate	GxGStrict	isTF	hasHumanHomolog	hasParalog	distFromGene	nucleosomeScore	inANucleosome	MAF	DAF	RMDerived
chrI_33070_A_T_+	YAL061W_chrI_33070_A_T_72_2	0.2158	0.625945	1.66537	0.114562	0.390684	-5.05693	UpStream	YAL061W	YAL061W	1	TRUE	+	1	73	1	chrI	33070	A	T	TRUE	0	-1	0	0	1	0	0	0.613	5.19517	FALSE	0.0470522	0.0359033	5	828	351	129	FALSE	FALSE	FALSE	378	NA	FALSE	0.387	0.387	FALSE
chrI_34943_C_G_+	YAL060W_chrI_34943_C_G_72_2	0.095826	1.30683	0.773248	0.450227	0.763302	-6.42473	UpStream	YAL060W	YAL060W	1	TRUE	+	1	73	1	chrI	34943	C	G	TRUE	0	0	-1	1	0	0	0	0.145	7.38741	FALSE	0.0748351	0.0493043	8	360	51	13	FALSE	FALSE	FALSE	212	NA	FALSE	0.145	0.145	TRUE
chrI_35059_G_A_+	YAL060W_chrI_35059_G_A_72_2	-0.0996994	-0.259364	-1.07124	0.299362	0.634352	-6.04904	UpStream	YAL060W	YAL060W	1	TRUE	+	1	73	1	chrI	35059	G	A	TRUE	0	1	0	-1	0	0	0	0.897	7.38741	FALSE	0.0748351	0.0493043	8	360	51	13	FALSE	FALSE	FALSE	96	1	TRUE	0.103	0.103	FALSE
chrI_35070_C_T_+	YAL060W_chrI_35070_C_T_72_2	0.0980848	-0.498018	1.03337	0.316225	0.654119	-6.27094	UpStream	YAL060W	YAL060W	1	TRUE	+	1	73	1	chrI	35070	C	T	TRUE	0	0	-1	0	1	0	0	0.977	7.38741	FALSE	0.0748351	0.0493043	8	360	51	13	FALSE	FALSE	FALSE	85	1	TRUE	0.023	0.023	FALSE
chrI_36436_CT_C_+	YAL059W_5UTR_0_2	-0.166064	-0.721692	-0.788701	0.436393	0.713991	-5.86676	TSS	YAL059W	YAL059W	1	TRUE	+	1	74	1	chrI	36436	CT	C	FALSE	-1	0	0	0	-1	0	0	0.912	6.24378	FALSE	0.178298	0.123034	27	1063	184	64	FALSE	FALSE	FALSE	73	NA	FALSE	0.088	NA	NA
chrI_37255_T_C_+	YAL058W_chrI_37255_T_C_72_2	-0.222788	-0.91113	-1.69531	0.108656	0.37988	-4.96488	UpStream	YAL058W	YAL058W	1	TRUE	+	1	73	1	chrI	37255	T	C	TRUE	0	0	1	0	-1	0	0	0.442	4.90221	FALSE	0.217511	0.159163	4	981	242	96	FALSE	TRUE	FALSE	209	2.18	TRUE	0.442	0.442	TRUE
chrI_37294_T_C_+	YAL058W_5UTR_0_2111	0.0276991	-0.961083	0.446498	0.658402	0.859337	-7.02702	TSS	YAL058W	YAL058W	1	TRUE	+	4	24	1	chrI	37294	T	C	TRUE	0	0	1	0	-1	0	0	0.908	4.90221	FALSE	0.217511	0.159163	4	981	242	96	FALSE	TRUE	FALSE	170	2.18	TRUE	0.092	0.092	FALSE
chrI_37315_T_A_+	YAL058W_chrI_37315_T_A_72_2	0.378156	-1.72067	1.91198	0.0732649	0.301913	-4.53542	UpStream	YAL058W	YAL058W	1	TRUE	+	1	73	1	chrI	37315	T	A	TRUE	0	1	0	0	-1	0	0	0.628	4.90221	FALSE	0.217511	0.159163	4	981	242	96	FALSE	TRUE	FALSE	149	NA	FALSE	0.372	0.628	TRUE
chrI_37330_A_G_+	YAL058W_chrI_37330_A_G_72_2	0.5623	-1.07905	2.71181	0.0150138	0.126837	-3.14489	UpStream	YAL058W	YAL058W	1	TRUE	+	1	73	1	chrI	37330	A	G	TRUE	0	-1	0	1	0	0	1	0.629	4.90221	FALSE	0.217511	0.159163	4	981	242	96	FALSE	TRUE	FALSE	134	NA	FALSE	0.371	0.629	TRUE
chrI_37330_A_G_-	YAL059C-A_chrI_37330_A_G_72_2	0.218337	-1.28379	2.93819	0.00934853	0.0949513	-3.18602	UpStream	YAL059C-A	YAL059C-A	1	TRUE	-	1	73	1	chrI	37330	A	G	TRUE	0	-1	0	1	0	0	0	0.629	NA	FALSE	NA	NA	NA	NA	NA	NA	FALSE	FALSE	FALSE	412	NA	FALSE	0.371	0.629	TRUE
chrI_37409_A_C_+	YAL058W_5UTR_0_1112	0.0834155	-0.93017	0.969722	0.339836	0.638515	-6.5832	TSS	YAL058W	YAL058W	1	TRUE	+	4	139	4	chrI	37409	A	C	TRUE	0	-1	1	0	0	0	0	0.155	4.90221	FALSE	0.217511	0.159163	4	981	242	96	FALSE	TRUE	FALSE	55	2.44	TRUE	0.155	0.155	TRUE
chrI_39105_A_G_+	YAL056W_5UTR_0_2111	0.118943	-0.225585	1.29174	0.206181	0.495454	-6.25508	TSS	YAL056W	YAL056W	1	TRUE	+	4	42	1	chrI	39105	A	G	TRUE	0	-1	0	1	0	0	0	0.617	5.61598	FALSE	NA	NA	13	1090	217	78	FALSE	FALSE	TRUE	154	NA	FALSE	0.383	0.617	TRUE
chrI_39123_C_T_+	YAL056W_5UTR_0_1211	0.168462	-0.201993	1.8178	0.0789607	0.301821	-5.46535	TSS	YAL056W	YAL056W	1	TRUE	+	4	60	2	chrI	39123	C	T	TRUE	0	0	-1	0	1	0	0	0.685	5.61598	FALSE	NA	NA	13	1090	217	78	FALSE	FALSE	TRUE	136	NA	FALSE	0.315	NA	NA
chrI_39144_G_A_+	YAL056W_5UTR_0_1121	0.218071	-0.176629	2.3757	0.0240104	0.15739	-4.42576	TSS	YAL056W	YAL056W	1	TRUE	+	4	81	3	chrI	39144	G	A	TRUE	0	1	0	-1	0	0	0	0.069	5.61598	FALSE	NA	NA	13	1090	217	78	FALSE	FALSE	TRUE	115	NA	FALSE	0.069	NA	NA
chrI_39162_C_G_+	YAL056W_5UTR_0_1112	-0.446684	-0.509077	-4.49465	9.42214e-05	0.00280355	0.809371	TSS	YAL056W	YAL056W	1	TRUE	+	4	99	4	chrI	39162	C	G	TRUE	0	0	-1	1	0	0	0	0.933	5.61598	FALSE	NA	NA	13	1090	217	78	FALSE	FALSE	TRUE	97	NA	FALSE	0.067	0.067	FALSE
chrI_45198_G_A_-	YAL054C_5UTR_0_2	0.330614	-0.50365	2.3423	0.0258984	0.164439	-4.13786	TSS	YAL054C	YAL054C	1	TRUE	-	1	20	1	chrI	45198	G	A	TRUE	0	1	0	-1	0	0	0	0.935	2.96861	FALSE	0.0256559	0.016666	8	961	157	41	FALSE	TRUE	FALSE	176	1.88	TRUE	0.065	0.065	FALSE
chrI_45634_C_CT_+	YAL053W_5UTR_0_2	-0.345473	0.414714	-2.45601	0.0199727	0.141961	-3.56418	TSS	YAL053W	YAL053W	1	TRUE	+	1	20	1	chrI	45634	C	CT	FALSE	1	0	0	0	1	0	0	0.421	6.57124	FALSE	0.0457028	0.0328203	30	912	201	71	FALSE	FALSE	TRUE	265	0.49	TRUE	0.421	NA	NA
chrI_48286_A_T_+	YAL051W_chrI_48286_A_T_72_2	0.171584	-1.94584	0.974393	0.343822	0.680789	-6.06677	UpStream	YAL051W	YAL051W	1	TRUE	+	1	73	1	chrI	48286	A	T	TRUE	0	-1	0	0	1	-2	0	0.463	4.17371	FALSE	0.0797735	0.0585292	15	824	72	16	TRUE	FALSE	TRUE	278	2.73	TRUE	0.463	0.463	TRUE
chrI_52733_A_G_-	YAL049C_chrI_52733_A_G_72_2	0.647108	0.699099	6.65337	4.55522e-06	0.000484697	4.40854	UpStream	YAL049C	YAL049C	1	TRUE	-	1	73	1	chrI	52733	A	G	TRUE	0	-1	0	1	0	0	0	0.446	7.51483	FALSE	0.098344	0.0715874	4	874	76	19	FALSE	TRUE	FALSE	138	NA	FALSE	0.446	NA	NA
chrI_53843_C_T_+	YAL047W-A_chrI_53843_C_T_72_2	-0.0206418	-0.929444	-0.16266	0.872746	0.956036	-6.70825	UpStream	YAL047W-A	YAL047W-A	1	TRUE	+	1	73	1	chrI	53843	C	T	TRUE	0	0	-1	0	1	0	0	0.96	NA	FALSE	NA	NA	NA	NA	NA	NA	FALSE	FALSE	FALSE	741	6.09	TRUE	0.04	0.04	FALSE
chrI_54175_A_G_+	YAL047W-A_5UTR_0_211	0.0491709	-0.835494	0.334148	0.740562	0.895433	-6.34466	TSS	YAL047W-A	YAL047W-A	1	TRUE	+	3	58	1	chrI	54175	A	G	TRUE	0	-1	0	1	0	0	0	0.952	NA	FALSE	NA	NA	NA	NA	NA	NA	FALSE	FALSE	FALSE	409	7.11	TRUE	0.048	0.048	FALSE
chrI_54198_G_A_+	YAL047W-A_5UTR_0_121	0.236864	-0.736042	1.7074	0.0979406	0.341274	-5.16373	TSS	YAL047W-A	YAL047W-A	1	TRUE	+	3	81	2	chrI	54198	G	A	TRUE	0	1	0	-1	0	0	0	0.73	NA	FALSE	NA	NA	NA	NA	NA	NA	FALSE	FALSE	FALSE	386	7.11	TRUE	0.27	0.73	TRUE
chrI_54244_A_G_+	YAL047W-A_5UTR_0_112	-0.0461036	-0.866598	-0.259742	0.796813	0.91809	-6.36161	TSS	YAL047W-A	YAL047W-A	1	TRUE	+	3	127	3	chrI	54244	A	G	TRUE	0	-1	0	1	0	0	1	0.965	NA	FALSE	NA	NA	NA	NA	NA	NA	FALSE	FALSE	FALSE	340	7.11	TRUE	0.035	0.035	FALSE
chrI_56888_G_GT_-	YAL047C_5UTR_0_21	0.0569803	0.379041	0.222726	0.825238	0.93407	-5.68855	TSS	YAL047C	YAL047C	1	TRUE	-	2	143	1	chrI	56888	G	GT	FALSE	1	0	0	0	1	0	0	0.586	4.17952	FALSE	0.17085	0.121853	120	NA	NA	NA	FALSE	FALSE	FALSE	31	1.51	TRUE	0.414	NA	NA
chrI_58490_A_T_-	YAL044C_5UTR_0_211	1.12259	1.64348	2.10201	0.0439376	0.22173	-3.72589	TSS	YAL044C	YAL044C	1	TRUE	-	3	126	1	chrI	58490	A	T	TRUE	0	-1	0	0	1	0	0	0.554	9.40444	FALSE	0.0459432	0.0337173	6	188	88	34	FALSE	TRUE	FALSE	28	5.56	TRUE	0.446	0.554	TRUE
chrI_69759_G_A_-	YAL039C_chrI_69759_G_A_72_2	0.12965	-0.205981	1.27141	0.221077	0.549979	-5.74442	UpStream	YAL039C	YAL039C	1	TRUE	-	1	73	1	chrI	69759	G	A	TRUE	0	1	0	-1	0	0	0	0.386	6.7307	FALSE	0.0901983	0.0694461	8	255	155	73	FALSE	FALSE	FALSE	234	0.35	TRUE	0.386	0.386	TRUE
chrI_70071_C_T_-	YAL039C_chrI_70071_C_T_72_2	-0.653181	0.376467	-3.18199	0.00557373	0.0703644	-2.08073	UpStream	YAL039C	YAL039C	1	TRUE	-	1	73	1	chrI	70071	C	T	TRUE	0	0	-1	0	1	0	0	0.985	6.7307	FALSE	0.0901983	0.0694461	8	255	155	73	FALSE	FALSE	FALSE	546	1.4	TRUE	0.015	0.015	FALSE
chrI_70906_GAAAAAA_GAAAAAAAA_+	YAL038W_chrI_70906_GAAAAAA_GAAAAAAAA_72_2	-0.0170549	-1.81774	-0.0530556	0.95832	0.985215	-5.95815	UpStream	YAL038W	YAL038W	1	TRUE	+	1	73	1	chrI	70906	GAAAAAA	GAAAAAAAA	FALSE	2	2	0	0	0	0	0	0.142	11.975	TRUE	0.0942262	0.0101073	124	938	243	91	FALSE	TRUE	TRUE	880	NA	FALSE	0.142	NA	NA
chrI_76368_G_C_+	YAL035W_5UTR_0_21	0.00390666	1.39367	0.0216086	0.982901	0.9947	-6.02627	TSS	YAL035W	YAL035W	1	TRUE	+	2	112	1	chrI	76368	G	C	TRUE	0	0	1	-1	0	0	0	0.548	7.57496	FALSE	0.0861014	0.0462713	74	NA	NA	NA	FALSE	TRUE	FALSE	59	NA	FALSE	0.452	0.548	TRUE
chrI_76386_G_A_+	YAL035W_5UTR_0_12	0.209887	1.49666	1.32558	0.194853	0.480551	-5.26625	TSS	YAL035W	YAL035W	1	TRUE	+	2	130	2	chrI	76386	G	A	TRUE	0	1	0	-1	0	0	0	0.539	7.57496	FALSE	0.0861014	0.0462713	74	NA	NA	NA	FALSE	TRUE	FALSE	41	10.29	TRUE	0.461	0.539	TRUE
chrI_92602_CT_C_-	YAL029C_chrI_92602_CT_C_72_2	-0.0244143	0.426061	-0.312221	0.758753	0.922026	-6.67901	UpStream	YAL029C	YAL029C	1	TRUE	-	1	74	1	chrI	92602	CT	C	FALSE	-1	0	0	0	-1	0	0	0.76	5.22711	FALSE	NA	NA	43	920	223	78	FALSE	TRUE	TRUE	332	NA	FALSE	0.24	NA	NA
chrI_94472_G_A_+	YAL027W_5UTR_0_2	-0.132156	-0.691387	-0.470031	0.641687	0.850946	-5.73328	TSS	YAL027W	YAL027W	1	TRUE	+	1	10	1	chrI	94472	G	A	TRUE	0	1	0	-1	0	0	0	0.951	4.78038	FALSE	0.121521	0.0932702	35	834	65	20	FALSE	FALSE	FALSE	215	1.47	TRUE	0.049	0.049	FALSE
chrI_108747_GT_G_-	YAL023C_5UTR_0_2	-0.224383	0.257543	-1.58699	0.12286	0.379087	-5.0873	TSS	YAL023C	YAL023C	1	TRUE	-	1	37	1	chrI	108747	GT	G	FALSE	-1	0	0	0	-1	0	0	0.458	7.57406	FALSE	0.0651504	0.0391202	25	943	276	125	FALSE	TRUE	TRUE	196	0.49	TRUE	0.458	NA	NA
chrI_114652_C_T_-	YAL020C_5UTR_0_2	-0.078843	-1.07869	-0.718351	0.478025	0.745005	-6.59347	TSS	YAL020C	YAL020C	1	TRUE	-	1	130	1	chrI	114652	C	T	TRUE	0	0	-1	0	1	0	0	0.963	5.40073	FALSE	0.186235	0.154578	7	910	210	72	FALSE	FALSE	FALSE	37	5.92	TRUE	0.037	0.037	FALSE
chrI_119951_T_C_-	YAL018C_chrI_119951_T_C_72_2	-0.0164287	-0.947304	-0.127575	0.900015	0.967565	-6.72497	UpStream	YAL018C	YAL018C	1	TRUE	-	1	73	1	chrI	119951	T	C	TRUE	0	0	1	0	-1	0	0	0.576	NA	FALSE	0.095397	0.0713797	10	800	129	45	FALSE	FALSE	FALSE	410	6.97	TRUE	0.424	0.576	TRUE
chrI_130613_C_CT_+	YAL012W_5UTR_0_2	0.130313	1.58773	2.39416	0.0230211	0.154237	-4.35607	TSS	YAL012W	YAL012W	1	TRUE	+	1	14	1	chrI	130613	C	CT	FALSE	1	0	0	0	1	0	0	0.14	8.80821	FALSE	0.0329111	0.0156176	20	682	155	71	FALSE	TRUE	FALSE	186	0.32	TRUE	0.14	NA	NA
chrI_136667_G_A_+	YAL008W_chrI_136667_G_A_72_2	-0.163847	-2.42688	-1.78427	0.0926341	0.341569	-5.21616	UpStream	YAL008W	YAL008W	1	TRUE	+	1	73	1	chrI	136667	G	A	TRUE	0	1	0	-1	0	0	0	0.625	6.5339	FALSE	0.164169	0.114917	6	739	94	20	FALSE	FALSE	FALSE	247	4.83	TRUE	0.375	0.625	TRUE
chrI_136814_T_C_+	YAL008W_chrI_136814_T_C_72_2	0.131812	-0.463009	1.72677	0.102734	0.36554	-5.33762	UpStream	YAL008W	YAL008W	1	TRUE	+	1	73	1	chrI	136814	T	C	TRUE	0	0	1	0	-1	0	0	0.622	6.5339	FALSE	0.164169	0.114917	6	739	94	20	FALSE	FALSE	FALSE	100	3.38	TRUE	0.378	0.622	TRUE
chrI_138499_G_A_+	tP(UGG)A_chrI_138499_G_A_72_2	0.436065	-0.311537	2.10541	0.050776	0.256405	-4.12301	UpStream	tP(UGG)A	tP(UGG)A	1	TRUE	+	1	73	1	chrI	138499	G	A	TRUE	0	1	0	-1	0	0	0	0.965	NA	FALSE	NA	NA	NA	NA	NA	NA	FALSE	FALSE	FALSE	653	0.79	TRUE	0.035	0.035	FALSE
chrI_138655_G_A_-	YAL007C_chrI_138655_G_A_72_2	-0.386193	-1.6213	-5.07516	0.000100069	0.00366948	1.21851	UpStream	YAL007C	YAL007C	1	TRUE	-	1	73	1	chrI	138655	G	A	TRUE	0	1	0	-1	0	0	0	0.854	8.02727	FALSE	0.0848299	0.0505003	52	781	202	53	FALSE	FALSE	TRUE	310	1.12	TRUE	0.146	NA	NA
chrI_138748_AT_A_-	YAL007C_chrI_138748_AT_A_72_2	0.489866	-1.11653	2.05822	0.0555923	0.265552	-4.10259	UpStream	YAL007C	YAL007C	1	TRUE	-	1	74	1	chrI	138748	AT	A	FALSE	-1	0	0	0	-1	0	0	0.869	8.02727	FALSE	0.0848299	0.0505003	52	781	202	53	FALSE	FALSE	TRUE	403	1.91	TRUE	0.131	0.131	FALSE
chrI_138770_A_G_+	tP(UGG)A_chrI_138770_A_G_72_2	0.204029	-1.80704	1.98723	0.063623	0.282069	-4.95855	UpStream	tP(UGG)A	YAL004W	2	FALSE	+	1	73	1	chrI	138770	A	G	TRUE	0	-1	0	1	0	0	0	0.852	NA	FALSE	NA	NA	NA	533	176	48	FALSE	FALSE	FALSE	1990	1.91	TRUE	0.148	0.148	FALSE
chrI_138793_T_C_+	tP(UGG)A_chrI_138793_T_C_72_2	-0.109095	-1.08628	-0.851535	0.406567	0.734582	-6.36178	UpStream	tP(UGG)A	YAL004W	2	FALSE	+	1	73	1	chrI	138793	T	C	TRUE	0	0	1	0	-1	0	0	0.789	NA	FALSE	NA	NA	NA	533	176	48	FALSE	FALSE	FALSE	1967	1.91	TRUE	0.211	0.211	FALSE
chrI_139045_C_G_-	YAL007C_chrI_139045_C_G_72_2	0.387491	-1.13821	3.38785	0.00358864	0.0519017	-2.11809	UpStream	YAL007C	YAL007C	1	TRUE	-	1	73	1	chrI	139045	C	G	TRUE	0	0	-1	1	0	0	0	0.809	8.02727	FALSE	0.0848299	0.0505003	52	781	202	53	FALSE	FALSE	TRUE	700	NA	FALSE	0.191	NA	NA
chrI_139073_G_A_-	YAL007C_chrI_139073_G_A_72_2	-0.308794	-1.43338	-2.25349	0.0380363	0.217371	-4.3165	UpStream	YAL007C	YAL007C	1	TRUE	-	1	73	1	chrI	139073	G	A	TRUE	0	1	0	-1	0	0	1	0.689	8.02727	FALSE	0.0848299	0.0505003	52	781	202	53	FALSE	FALSE	TRUE	728	NA	FALSE	0.311	NA	NA
chrI_141802_C_T_-	YAL005C_chrI_141802_C_T_72_2	0.156214	2.3936	1.57578	0.133907	0.422023	-5.30702	UpStream	YAL005C	YAL005C	1	TRUE	-	1	73	1	chrI	141802	C	T	TRUE	0	0	-1	0	1	0	0	0.705	8.29204	FALSE	0.0414491	0.0117402	690	499	154	56	FALSE	TRUE	FALSE	371	0.37	TRUE	0.295	0.705	TRUE
chrI_141835_A_G_+	YAL003W_chrI_141835_A_G_72_2	-0.303814	2.18747	-1.95549	0.0675417	0.291074	-4.4717	UpStream	YAL003W	YAL003W	1	TRUE	+	1	73	1	chrI	141835	A	G	TRUE	0	-1	0	1	0	0	-1	0.648	10.7404	TRUE	NA	NA	23	NA	NA	NA	FALSE	TRUE	FALSE	339	0.37	TRUE	0.352	0.648	TRUE
chrI_151740_T_C_+	YAR002W_chrI_151740_T_C_72_2	-0.294686	-2.00054	-1.93468	0.070227	0.298048	-4.85942	UpStream	YAR002W	YAR002W	1	TRUE	+	1	73	1	chrI	151740	T	C	TRUE	0	0	1	0	-1	0	0	0.098	6.1111	FALSE	0.203953	0.153862	40	831	368	189	FALSE	FALSE	FALSE	517	3.3	TRUE	0.098	0.098	TRUE
chrI_154746_C_T_+	YAR003W_chrI_154746_C_T_72_2	-0.0175915	-1.51297	-0.232001	0.819368	0.939972	-6.73556	UpStream	YAR003W	YAR003W	1	TRUE	+	1	73	1	chrI	154746	C	T	TRUE	0	0	-1	0	1	0	0	0.416	5.33617	FALSE	0.0566481	0.041527	20	1784	744	293	FALSE	TRUE	FALSE	259	7.95	TRUE	0.416	0.416	TRUE
chrI_154847_GTT_GTTT_+	YAR003W_5UTR_0_12	0.182575	-0.0188906	0.74798	0.460218	0.730907	-5.5151	TSS	YAR003W	YAR003W	1	TRUE	+	2	72	2	chrI	154847	GTT	GTTT	FALSE	1	0	0	0	1	0	0	0.389	5.33617	FALSE	0.0566481	0.041527	20	1784	744	293	FALSE	TRUE	FALSE	158	0.41	TRUE	0.389	NA	NA
chrI_158733_A_T_-	YAR007C_5UTR_0_21	0.0300202	-0.23561	0.715503	0.479757	0.745005	-7.24333	TSS	YAR007C	YAR007C	1	TRUE	-	2	94	1	chrI	158733	A	T	TRUE	0	-1	0	0	1	0	0	0.597	6.1088	TRUE	0.0239814	0.0162285	141	601	285	135	FALSE	TRUE	FALSE	114	NA	FALSE	0.403	0.597	TRUE
chrI_158824_G_C_-	YAR007C_chrI_158824_G_C_72_2	0.132578	1.32927	1.81588	0.0874604	0.332647	-5.24495	UpStream	YAR007C	YAR007C	1	TRUE	-	1	73	1	chrI	158824	G	C	TRUE	0	0	1	-1	0	0	0	0.588	6.1088	TRUE	0.0239814	0.0162285	141	601	285	135	FALSE	TRUE	FALSE	205	NA	FALSE	0.412	0.588	TRUE
chrI_158827_G_A_-	YAR007C_chrI_158827_G_A_72_2	0.235951	0.45327	3.20176	0.00534361	0.0692191	-2.54899	UpStream	YAR007C	YAR007C	1	TRUE	-	1	73	1	chrI	158827	G	A	TRUE	0	1	0	-1	0	0	0	0.576	6.1088	TRUE	0.0239814	0.0162285	141	601	285	135	FALSE	TRUE	FALSE	208	NA	FALSE	0.424	0.576	TRUE
chrI_158870_T_C_-	YAR007C_chrI_158870_T_C_72_2	-0.191078	-1.27475	-1.59657	0.129188	0.414302	-5.28459	UpStream	YAR007C	YAR007C	1	TRUE	-	1	73	1	chrI	158870	T	C	TRUE	0	0	1	0	-1	0	0	0.97	6.1088	TRUE	0.0239814	0.0162285	141	601	285	135	FALSE	TRUE	FALSE	251	2.01	TRUE	0.03	0.03	FALSE
chrI_171848_G_GA_-	YAR018C_5UTR_0_2	0.00583844	0.113778	0.160156	0.873818	0.950827	-7.40298	TSS	YAR018C	YAR018C	1	TRUE	-	1	8	1	chrI	171848	G	GA	FALSE	1	1	0	0	0	0	0	0.654	5.69142	FALSE	0.0309106	0.0219038	102	1116	320	129	FALSE	TRUE	FALSE	145	NA	FALSE	0.346	0.346	FALSE
chrI_171866_TA_TAA_-	YAR018C_chrI_171866_TA_TAA_72_2	-0.109081	1.43267	-1.54862	0.140292	0.434318	-5.57369	UpStream	YAR018C	YAR018C	1	TRUE	-	1	73	1	chrI	171866	TA	TAA	FALSE	1	1	0	0	0	0	0	0.476	5.69142	FALSE	0.0309106	0.0219038	102	1116	320	129	FALSE	TRUE	FALSE	163	NA	FALSE	0.476	NA	NA
chrI_172113_C_A_-	YAR018C_chrI_172113_C_A_72_2	0.0571574	-2.15016	0.717542	0.482997	0.788931	-6.55344	UpStream	YAR018C	YAR018C	1	TRUE	-	1	73	1	chrI	172113	C	A	TRUE	0	1	-1	0	0	0	0	0.959	5.69142	FALSE	0.0309106	0.0219038	102	1116	320	129	FALSE	TRUE	FALSE	410	0.31	TRUE	0.041	0.041	FALSE
chrI_172129_A_T_-	YAR018C_chrI_172129_A_T_72_2	0.191253	-1.90282	1.84657	0.0826821	0.32215	-5.17304	UpStream	YAR018C	YAR018C	1	TRUE	-	1	73	1	chrI	172129	A	T	TRUE	0	-1	0	0	1	0	0	0.959	5.69142	FALSE	0.0309106	0.0219038	102	1116	320	129	FALSE	TRUE	FALSE	426	0.31	TRUE	0.041	0.041	FALSE
chrI_175541_A_G_-	YAR019C_chrI_175541_A_G_72_2	0.116428	-1.02823	0.917199	0.372149	0.705144	-6.16592	UpStream	YAR019C	YAR019C	1	TRUE	-	1	73	1	chrI	175541	A	G	TRUE	0	-1	0	1	0	0	0	0.007913	3.61861	TRUE	NA	NA	54	1480	620	262	FALSE	TRUE	FALSE	406	5.65	TRUE	0.007913	0.007913	TRUE
chrI_175653_C_T_-	YAR019C_chrI_175653_C_T_72_2	-0.56391	-1.0994	-6.41841	7.06604e-06	0.000657878	3.95363	UpStream	YAR019C	YAR019C	1	TRUE	-	1	73	1	chrI	175653	C	T	TRUE	0	0	-1	0	1	0	0	0.151	3.61861	TRUE	NA	NA	54	1480	620	262	FALSE	TRUE	FALSE	518	14.29	TRUE	0.151	0.151	TRUE
chrI_175805_TA_T_-	YAR019C_chrI_175805_TA_T_72_2	0.21903	-1.8887	2.3834	0.0293708	0.186446	-4.10248	UpStream	YAR019C	YAR019C	1	TRUE	-	1	74	1	chrI	175805	TA	T	FALSE	-1	-1	0	0	0	0	0	0.145	3.61861	TRUE	NA	NA	54	1480	620	262	FALSE	TRUE	FALSE	670	10.61	TRUE	0.145	0.145	TRUE
chrI_175856_TG_T_-	YAR019C_chrI_175856_TG_T_72_2	0.0272043	-1.09585	0.187221	0.853752	0.951736	-6.43251	UpStream	YAR019C	YAR019C	1	TRUE	-	1	74	1	chrI	175856	TG	T	FALSE	-1	0	0	-1	0	0	0	0.576	3.61861	TRUE	NA	NA	54	1480	620	262	FALSE	TRUE	FALSE	721	10.61	TRUE	0.424	0.576	TRUE
chrI_175876_C_T_-	YAR019C_chrI_175876_C_T_72_2	0.0116176	-1.0235	0.0760468	0.940289	0.981038	-6.61587	UpStream	YAR019C	YAR019C	1	TRUE	-	1	73	1	chrI	175876	C	T	TRUE	0	0	-1	0	1	0	0	0.601	3.61861	TRUE	NA	NA	54	1480	620	262	FALSE	TRUE	FALSE	741	10.61	TRUE	0.399	0.399	FALSE
chrI_180069_A_G_-	YAR023C_chrI_180069_A_G_72_2	0.752889	-1.01898	5.68246	2.93338e-05	0.00159869	2.63327	UpStream	YAR023C	YAR023C	1	TRUE	-	1	73	1	chrI	180069	A	G	TRUE	0	-1	0	1	0	0	0	0.688	3.54166	FALSE	NA	NA	3	773	74	25	FALSE	FALSE	FALSE	249	1.64	TRUE	0.312	0.312	FALSE
chrI_180103_T_C_-	YAR023C_chrI_180103_T_C_72_2	-0.033394	-1.06103	-0.444266	0.662577	0.880219	-6.70733	UpStream	YAR023C	YAR023C	1	TRUE	-	1	73	1	chrI	180103	T	C	TRUE	0	0	1	0	-1	0	0	0.643	3.54166	FALSE	NA	NA	3	773	74	25	FALSE	FALSE	FALSE	283	1.64	TRUE	0.357	0.643	TRUE
chrI_180161_G_GC_+	tL(CAA)A_chrI_180161_G_GC_72_2	0.109245	-1.53814	1.26815	0.222212	0.55013	-5.90776	UpStream	tL(CAA)A	tL(CAA)A	1	TRUE	+	1	73	1	chrI	180161	G	GC	FALSE	1	0	1	0	0	0	0	0.628	NA	FALSE	NA	NA	6	NA	NA	NA	FALSE	FALSE	FALSE	980	2.39	TRUE	0.372	0.628	TRUE
chrI_180161_G_GC_-	YAR023C_chrI_180161_G_GC_72_2	0.186581	-0.884246	2.5248	0.0220621	0.15725	-4.0125	UpStream	YAR023C	YAR023C	1	TRUE	-	1	73	1	chrI	180161	G	GC	FALSE	1	0	1	0	0	0	0	0.628	3.54166	FALSE	NA	NA	3	773	74	25	FALSE	FALSE	FALSE	341	2.39	TRUE	0.372	0.628	TRUE
chrI_180456_G_A_-	YAR023C_chrI_180456_G_A_72_2	-0.263766	-1.46402	-2.09665	0.0516405	0.258097	-4.62693	UpStream	YAR023C	YAR023C	1	TRUE	-	1	73	1	chrI	180456	G	A	TRUE	0	1	0	-1	0	0	0	0.412	3.54166	FALSE	NA	NA	3	773	74	25	FALSE	FALSE	FALSE	636	0.32	TRUE	0.412	0.412	TRUE
chrI_180509_C_T_+	tL(CAA)A_chrI_180509_C_T_72_2	0.131617	-1.49619	1.02536	0.319879	0.658939	-6.19968	UpStream	tL(CAA)A	tL(CAA)A	1	TRUE	+	1	73	1	chrI	180509	C	T	TRUE	0	0	-1	0	1	0	0	0.445	NA	FALSE	NA	NA	6	NA	NA	NA	FALSE	FALSE	FALSE	632	0.32	TRUE	0.445	0.445	TRUE
chrI_180583_C_A_-	YAR023C_chrI_180583_C_A_72_2	0.0621977	-0.798081	0.354496	0.727422	0.910602	-6.6211	UpStream	YAR023C	YAR023C	1	TRUE	-	1	73	1	chrI	180583	C	A	TRUE	0	1	-1	0	0	0	0	0.426	3.54166	FALSE	NA	NA	3	773	74	25	FALSE	FALSE	FALSE	763	3.49	TRUE	0.426	0.426	TRUE
chrI_180726_G_C_-	YAR023C_5UTR_0_211111111	0.0747201	-0.756212	0.763844	0.450847	0.722815	-6.79517	TSS	YAR023C	YAR023C	1	TRUE	-	9	116	1	chrI	180726	G	C	TRUE	0	0	1	-1	0	0	0	0.456	3.54166	FALSE	NA	NA	3	773	74	25	FALSE	FALSE	FALSE	906	10.66	TRUE	0.456	0.456	TRUE
chrI_180747_A_G_-	YAR023C_chrI_180747_A_G_72_2	0.257896	-1.01224	2.71546	0.0149005	0.126328	-3.66092	UpStream	YAR023C	YAR023C	1	TRUE	-	1	73	1	chrI	180747	A	G	TRUE	0	-1	0	1	0	0	0	0.976	3.54166	FALSE	NA	NA	3	773	74	25	FALSE	FALSE	FALSE	927	10.66	TRUE	0.024	0.024	FALSE
chrI_180787_C_T_-	YAR023C_5UTR_0_112111111	-0.0718628	-0.824454	-0.790305	0.43547	0.71325	-6.75037	TSS	YAR023C	YAR023C	1	TRUE	-	9	55	3	chrI	180787	C	T	TRUE	0	0	-1	0	1	0	0	0.5	3.54166	FALSE	NA	NA	3	773	74	25	FALSE	FALSE	FALSE	967	10.66	TRUE	0.5	0.5	FALSE
chrI_180794_T_A_-	YAR023C_5UTR_0_111211111	-0.0274988	-0.80351	-0.310705	0.758145	0.901988	-6.99654	TSS	YAR023C	YAR023C	1	TRUE	-	9	48	4	chrI	180794	T	A	TRUE	0	1	0	0	-1	0	0	0.411	3.54166	FALSE	NA	NA	3	773	74	25	FALSE	FALSE	FALSE	974	10.66	TRUE	0.411	0.411	TRUE
chrI_180794_T_A_+	tL(CAA)A_chrI_180794_T_A_72_2	0.1132	-0.745445	0.884744	0.388907	0.720568	-6.161	UpStream	tL(CAA)A	tL(CAA)A	1	TRUE	+	1	73	1	chrI	180794	T	A	TRUE	0	1	0	0	-1	0	0	0.411	NA	FALSE	NA	NA	6	NA	NA	NA	FALSE	FALSE	FALSE	347	10.66	TRUE	0.411	0.411	TRUE
chrI_180818_C_A_-	YAR023C_5UTR_0_111121111	-0.0124848	-0.799373	-0.153629	0.878917	0.951639	-7.03942	TSS	YAR023C	YAR023C	1	TRUE	-	9	24	5	chrI	180818	C	A	TRUE	0	1	-1	0	0	0	0	0.532	3.54166	FALSE	NA	NA	3	773	74	25	FALSE	FALSE	FALSE	998	10.66	TRUE	0.468	0.468	FALSE
chrI_180822_T_A_-	YAR023C_5UTR_0_111112111	-0.0854149	-0.832188	-0.908178	0.370926	0.663986	-6.63713	TSS	YAR023C	YAR023C	1	TRUE	-	9	20	6	chrI	180822	T	A	TRUE	0	1	0	0	-1	0	0	0.582	3.54166	FALSE	NA	NA	3	773	74	25	FALSE	FALSE	FALSE	1002	10.66	TRUE	0.418	0.418	FALSE
chrI_180829_T_TC_-	YAR023C_5UTR_0_111111211	0.012951	-0.785527	0.159776	0.874114	0.950827	-7.0849	TSS	YAR023C	YAR023C	1	TRUE	-	9	13	7	chrI	180829	T	TC	FALSE	1	0	1	0	0	0	0	0.538	3.54166	FALSE	NA	NA	3	773	74	25	FALSE	FALSE	FALSE	1009	10.66	TRUE	0.462	0.462	FALSE
chrI_180831_A_T_-	YAR023C_5UTR_0_111111121	0.115619	-0.732339	1.10925	0.276019	0.574312	-6.40935	TSS	YAR023C	YAR023C	1	TRUE	-	9	11	8	chrI	180831	A	T	TRUE	0	-1	0	0	1	0	0	0.561	3.54166	FALSE	NA	NA	3	773	74	25	FALSE	FALSE	FALSE	1011	10.66	TRUE	0.439	0.439	FALSE
chrI_180835_T_C_-	YAR023C_5UTR_0_111111112	0.199714	-0.692897	2.40066	0.0226822	0.152979	-4.37211	TSS	YAR023C	YAR023C	1	TRUE	-	9	7	9	chrI	180835	T	C	TRUE	0	0	1	0	-1	0	0	0.581	3.54166	FALSE	NA	NA	3	773	74	25	FALSE	FALSE	FALSE	1015	10.66	TRUE	0.419	0.419	FALSE
chrI_180844_A_T_+	tL(CAA)A_chrI_180844_A_T_72_2	0.198456	-0.848132	1.32307	0.203717	0.52808	-5.63792	UpStream	tL(CAA)A	tL(CAA)A	1	TRUE	+	1	73	1	chrI	180844	A	T	TRUE	0	-1	0	0	1	0	0	0.589	NA	FALSE	NA	NA	6	NA	NA	NA	FALSE	FALSE	FALSE	297	10.66	TRUE	0.411	NA	NA
chrI_182752_C_A_-	tS(AGA)A_chrI_182752_C_A_72_2	0.0530869	-0.51213	0.459373	0.651914	0.874241	-6.51122	UpStream	tS(AGA)A	tS(AGA)A	1	TRUE	-	1	73	1	chrI	182752	C	A	TRUE	0	1	-1	0	0	0	0	NA	NA	FALSE	NA	NA	NA	NA	NA	NA	FALSE	FALSE	FALSE	149	6.1	TRUE	NA	NA	NA
chrI_182871_A_C_+	YAR027W_chrI_182871_A_C_72_2	0.323643	-1.69365	1.29404	0.213335	0.539079	-5.08836	UpStream	YAR027W	YAR027W	1	TRUE	+	1	73	1	chrI	182871	A	C	TRUE	0	-1	1	0	0	0	0	NA	5.41148	FALSE	NA	NA	63	471	83	26	FALSE	FALSE	FALSE	899	0.3	TRUE	NA	NA	NA
chrI_183100_G_A_+	YAR027W_chrI_183100_G_A_72_2	0.111434	-0.973556	0.705847	0.490054	0.790346	-6.25789	UpStream	YAR027W	YAR027W	1	TRUE	+	1	73	1	chrI	183100	G	A	TRUE	0	1	0	-1	0	0	0	0.79	5.41148	FALSE	NA	NA	63	471	83	26	FALSE	FALSE	FALSE	670	0.61	TRUE	0.21	NA	NA
chrI_183101_A_G_+	YAR027W_chrI_183101_A_G_72_2	0.409648	-0.782345	2.2141	0.0411005	0.226763	-4.25492	UpStream	YAR027W	YAR027W	1	TRUE	+	1	73	1	chrI	183101	A	G	TRUE	0	-1	0	1	0	0	0	0.778	5.41148	FALSE	NA	NA	63	471	83	26	FALSE	FALSE	FALSE	669	0.61	TRUE	0.222	NA	NA
chrI_183270_T_C_+	YAR027W_chrI_183270_T_C_72_2	0.0645284	-0.700436	0.820775	0.423384	0.744933	-6.49869	UpStream	YAR027W	YAR027W	1	TRUE	+	1	73	1	chrI	183270	T	C	TRUE	0	0	1	0	-1	0	0	0.899	5.41148	FALSE	NA	NA	63	471	83	26	FALSE	FALSE	FALSE	500	0.78	TRUE	0.101	NA	NA
chrI_183331_G_T_+	YAR027W_chrI_183331_G_T_72_2	-0.167101	-1.55555	-2.26364	0.0372816	0.214982	-4.5072	UpStream	YAR027W	YAR027W	1	TRUE	+	1	73	1	chrI	183331	G	T	TRUE	0	0	0	-1	1	0	0	0.971	5.41148	FALSE	NA	NA	63	471	83	26	FALSE	FALSE	FALSE	439	0.78	TRUE	0.029	0.971	TRUE
chrI_183331_G_T_-	tS(AGA)A_chrI_183331_G_T_72_2	0.0622731	-1.27653	0.3757	0.711889	0.907133	-6.27811	UpStream	tS(AGA)A	tS(AGA)A	1	TRUE	-	1	73	1	chrI	183331	G	T	TRUE	0	0	0	-1	1	0	0	0.971	NA	FALSE	NA	NA	NA	NA	NA	NA	FALSE	FALSE	FALSE	728	0.78	TRUE	0.029	0.971	TRUE
chrI_183353_C_T_+	YAR027W_chrI_183353_C_T_72_2	0.0124041	-1.84618	0.13637	0.893166	0.965276	-6.77904	UpStream	YAR027W	YAR027W	1	TRUE	+	1	73	1	chrI	183353	C	T	TRUE	0	0	-1	0	1	0	0	0.922	5.41148	FALSE	NA	NA	63	471	83	26	FALSE	FALSE	FALSE	417	0.78	TRUE	0.078	NA	NA
chrI_183353_C_T_-	tS(AGA)A_chrI_183353_C_T_72_2	0.190607	-1.6316	1.28793	0.215405	0.542334	-5.68005	UpStream	tS(AGA)A	tS(AGA)A	1	TRUE	-	1	73	1	chrI	183353	C	T	TRUE	0	0	-1	0	1	0	0	0.922	NA	FALSE	NA	NA	NA	NA	NA	NA	FALSE	FALSE	FALSE	750	0.78	TRUE	0.078	NA	NA
chrI_183545_C_T_+	YAR027W_chrI_183545_C_T_72_2	0.131164	-0.351793	1.31878	0.205116	0.530169	-5.91241	UpStream	YAR027W	YAR027W	1	TRUE	+	1	73	1	chrI	183545	C	T	TRUE	0	0	-1	0	1	0	0	0.786	5.41148	FALSE	NA	NA	63	471	83	26	FALSE	FALSE	FALSE	225	1.76	TRUE	0.214	0.786	TRUE
chrI_183566_AC_A_+	YAR027W_chrI_183566_AC_A_72_2	0.0838274	0.835926	0.802872	0.433374	0.752387	-6.20651	UpStream	YAR027W	YAR027W	1	TRUE	+	1	72	1	chrI	183566	AC	A	FALSE	-1	0	-1	0	0	0	0	0.538	5.41148	FALSE	NA	NA	63	471	83	26	FALSE	FALSE	FALSE	204	1.76	TRUE	0.462	NA	NA
chrI_183569_A_T_+	YAR027W_chrI_183569_A_T_72_2	0.108184	0.33516	1.03356	0.316138	0.654119	-6.10283	UpStream	YAR027W	YAR027W	1	TRUE	+	1	73	1	chrI	183569	A	T	TRUE	0	-1	0	0	1	0	0	0.513	5.41148	FALSE	NA	NA	63	471	83	26	FALSE	FALSE	FALSE	201	1.76	TRUE	0.487	NA	NA
chrI_183571_A_AGG_+	YAR027W_chrI_183571_A_AGG_72_2	-0.168851	0.599148	-1.79357	0.0910848	0.338067	-5.07959	UpStream	YAR027W	YAR027W	1	TRUE	+	1	73	1	chrI	183571	A	AGG	FALSE	2	0	0	2	0	0	0	0.555	5.41148	FALSE	NA	NA	63	471	83	26	FALSE	FALSE	FALSE	199	1.76	TRUE	0.445	0.555	TRUE
chrI_183571_A_AGG_-	tS(AGA)A_chrI_183571_A_AGG_72_2	0.429585	-0.204749	2.69325	0.0156028	0.129953	-3.16134	UpStream	tS(AGA)A	tS(AGA)A	1	TRUE	-	1	73	1	chrI	183571	A	AGG	FALSE	2	0	0	2	0	0	0	0.555	NA	FALSE	NA	NA	NA	NA	NA	NA	FALSE	FALSE	FALSE	968	1.76	TRUE	0.445	0.555	TRUE
chrI_183590_A_G_+	YAR027W_chrI_183590_A_G_72_2	0.615781	0.947185	4.14811	0.000701858	0.0157618	-0.573864	UpStream	YAR027W	YAR027W	1	TRUE	+	1	73	1	chrI	183590	A	G	TRUE	0	-1	0	1	0	0	0	0.669	5.41148	FALSE	NA	NA	63	471	83	26	FALSE	FALSE	FALSE	180	1.76	TRUE	0.331	NA	NA
chrI_183591_C_G_+	YAR027W_chrI_183591_C_G_72_2	-0.402886	0.622126	-2.62131	0.0181027	0.14263	-3.66421	UpStream	YAR027W	YAR027W	1	TRUE	+	1	73	1	chrI	183591	C	G	TRUE	0	0	-1	1	0	0	0	0.669	5.41148	FALSE	NA	NA	63	471	83	26	FALSE	FALSE	FALSE	179	1.76	TRUE	0.331	NA	NA
chrI_183596_C_T_+	YAR027W_chrI_183596_C_T_72_2	-0.329608	0.95499	-2.91587	0.00979852	0.0973102	-3.13373	UpStream	YAR027W	YAR027W	1	TRUE	+	1	73	1	chrI	183596	C	T	TRUE	0	0	-1	0	1	0	0	0.939	5.41148	FALSE	NA	NA	63	471	83	26	FALSE	FALSE	FALSE	174	1.76	TRUE	0.061	NA	NA
chrI_183596_C_T_-	tS(AGA)A_chrI_183596_C_T_72_2	0.309808	-0.100416	1.43343	0.170267	0.481598	-5.0121	UpStream	tS(AGA)A	tS(AGA)A	1	TRUE	-	1	73	1	chrI	183596	C	T	TRUE	0	0	-1	0	1	0	0	0.939	NA	FALSE	NA	NA	NA	NA	NA	NA	FALSE	FALSE	FALSE	993	1.76	TRUE	0.061	NA	NA
chrI_183624_A_AG_+	YAR027W_chrI_183624_A_AG_72_2	0.114902	-0.228451	1.22769	0.236656	0.570478	-5.97494	UpStream	YAR027W	YAR027W	1	TRUE	+	1	73	1	chrI	183624	A	AG	FALSE	1	0	0	1	0	0	0	0.709	5.41148	FALSE	NA	NA	63	471	83	26	FALSE	FALSE	FALSE	146	1.76	TRUE	0.291	NA	NA
chrI_183626_A_AG_+	YAR027W_chrI_183626_A_AG_72_2	-0.0377199	-0.118818	-0.397809	0.69583	0.899733	-6.60081	UpStream	YAR027W	YAR027W	1	TRUE	+	1	73	1	chrI	183626	A	AG	FALSE	1	0	0	1	0	0	0	0.685	5.41148	FALSE	NA	NA	63	471	83	26	FALSE	FALSE	FALSE	144	1.76	TRUE	0.315	0.685	TRUE
chrI_183650_G_A_+	YAR027W_chrI_183650_G_A_72_2	0.0722522	-0.300594	0.873277	0.394947	0.726345	-6.3067	UpStream	YAR027W	YAR027W	1	TRUE	+	1	73	1	chrI	183650	G	A	TRUE	0	1	0	-1	0	0	0	0.725	5.41148	FALSE	NA	NA	63	471	83	26	FALSE	FALSE	FALSE	120	NA	FALSE	0.275	NA	NA
chrI_184481_C_A_+	YAR028W_chrI_184481_C_A_72_2	0.203817	-1.37923	1.85066	0.0820633	0.320018	-5.03752	UpStream	YAR028W	YAR028W	1	TRUE	+	1	73	1	chrI	184481	C	A	TRUE	0	1	-1	0	0	0	0	0.925	3.6075	FALSE	NA	NA	14	775	152	53	FALSE	FALSE	FALSE	411	1.74	TRUE	0.075	0.925	TRUE
chrI_184488_T_C_+	YAR028W_chrI_184488_T_C_72_2	0.0470779	-1.29506	0.30763	0.762183	0.922329	-6.50055	UpStream	YAR028W	YAR028W	1	TRUE	+	1	73	1	chrI	184488	T	C	TRUE	0	0	1	0	-1	0	0	0.912	3.6075	FALSE	NA	NA	14	775	152	53	FALSE	FALSE	FALSE	404	1.74	TRUE	0.088	0.912	TRUE
chrI_184492_T_C_+	YAR028W_chrI_184492_T_C_72_2	0.340892	-1.42073	2.60792	0.0186083	0.145132	-3.65582	UpStream	YAR028W	YAR028W	1	TRUE	+	1	73	1	chrI	184492	T	C	TRUE	0	0	1	0	-1	0	0	0.927	3.6075	FALSE	NA	NA	14	775	152	53	FALSE	FALSE	FALSE	400	1.74	TRUE	0.073	0.927	TRUE
chrI_184510_T_C_+	YAR028W_chrI_184510_T_C_72_2	0.333461	-1.1087	2.79307	0.012677	0.114667	-3.36485	UpStream	YAR028W	YAR028W	1	TRUE	+	1	73	1	chrI	184510	T	C	TRUE	0	0	1	0	-1	0	0	0.847	3.6075	FALSE	NA	NA	14	775	152	53	FALSE	FALSE	FALSE	382	1.74	TRUE	0.153	0.847	TRUE
chrI_184520_T_C_+	YAR028W_chrI_184520_T_C_72_2	0.233708	-1.13127	2.14745	0.0468093	0.245529	-4.59586	UpStream	YAR028W	YAR028W	1	TRUE	+	1	73	1	chrI	184520	T	C	TRUE	0	0	1	0	-1	0	-1	0.567	3.6075	FALSE	NA	NA	14	775	152	53	FALSE	FALSE	FALSE	372	1.74	TRUE	0.433	NA	NA
chrI_184641_C_CTA_+	YAR028W_chrI_184641_C_CTA_72_2	-0.366	-1.2117	-2.39635	0.0286168	0.183928	-3.94438	UpStream	YAR028W	YAR028W	1	TRUE	+	1	73	1	chrI	184641	C	CTA	FALSE	2	1	0	0	1	0	0	0.002427	3.6075	FALSE	NA	NA	14	775	152	53	FALSE	FALSE	FALSE	251	2.47	TRUE	0.002427	NA	NA
chrI_184648_A_T_+	YAR028W_chrI_184648_A_T_72_2	0.611673	-1.21941	2.39245	0.0288418	0.184165	-3.54643	UpStream	YAR028W	YAR028W	1	TRUE	+	1	73	1	chrI	184648	A	T	TRUE	0	-1	0	0	1	0	0	0.528	3.6075	FALSE	NA	NA	14	775	152	53	FALSE	FALSE	FALSE	244	2.47	TRUE	0.472	NA	NA
chrI_184669_G_T_+	YAR028W_chrI_184669_G_T_72_2	0.273988	-0.90486	0.75717	0.459542	0.770054	-5.29979	UpStream	YAR028W	YAR028W	1	TRUE	+	1	73	1	chrI	184669	G	T	TRUE	0	0	0	-1	1	0	0	0.53	3.6075	FALSE	NA	NA	14	775	152	53	FALSE	FALSE	FALSE	223	2.47	TRUE	0.47	NA	NA
chrI_184683_C_G_+	YAR028W_chrI_184683_C_G_72_2	0.208174	-0.330677	1.74982	0.0985752	0.355842	-5.07401	UpStream	YAR028W	YAR028W	1	TRUE	+	1	73	1	chrI	184683	C	G	TRUE	0	0	-1	1	0	0	0	0.433	3.6075	FALSE	NA	NA	14	775	152	53	FALSE	FALSE	FALSE	209	2.47	TRUE	0.433	NA	NA
chrI_184686_C_T_+	YAR028W_chrI_184686_C_T_72_2	-0.0653354	-0.773316	-0.786674	0.442539	0.758324	-6.34186	UpStream	YAR028W	YAR028W	1	TRUE	+	1	73	1	chrI	184686	C	T	TRUE	0	0	-1	0	1	0	1	0.549	3.6075	FALSE	NA	NA	14	775	152	53	FALSE	FALSE	FALSE	206	2.47	TRUE	0.451	NA	NA
chrI_184718_CG_C_+	YAR028W_chrI_184718_CG_C_72_2	-0.151593	0.191259	-1.91087	0.0734155	0.301913	-5.14618	UpStream	YAR028W	YAR028W	1	TRUE	+	1	72	1	chrI	184718	CG	C	FALSE	-1	0	0	-1	0	0	0	0.007371	3.6075	FALSE	NA	NA	14	775	152	53	FALSE	FALSE	FALSE	174	NA	FALSE	0.007371	NA	NA
chrI_184781_C_CT_+	YAR028W_chrI_184781_C_CT_72_2	-0.573224	0.157061	-6.17448	1.1235e-05	0.000851002	3.42507	UpStream	YAR028W	YAR028W	1	TRUE	+	1	73	1	chrI	184781	C	CT	FALSE	1	0	0	0	1	0	0	0.531	3.6075	FALSE	NA	NA	14	775	152	53	FALSE	FALSE	FALSE	111	NA	FALSE	0.469	NA	NA
chrI_186987_G_A_-	YAR030C_chrI_186987_G_A_72_2	-0.449884	-1.33838	-2.72531	0.0145986	0.125669	-3.09371	UpStream	YAR030C	YAR030C	1	TRUE	-	1	73	1	chrI	186987	G	A	TRUE	0	1	0	-1	0	0	0	0.726	NA	FALSE	NA	NA	NA	379	48	11	FALSE	FALSE	FALSE	134	2.31	TRUE	0.274	0.274	FALSE
chrI_187427_T_A_-	YAR030C_chrI_187427_T_A_72_2	-0.112653	-1.08649	-1.11234	0.281811	0.617465	-6.05518	UpStream	YAR030C	YAR030C	1	TRUE	-	1	73	1	chrI	187427	T	A	TRUE	0	1	0	0	-1	0	0	0.603	NA	FALSE	NA	NA	NA	379	48	11	FALSE	FALSE	FALSE	574	2.5	TRUE	0.397	NA	NA
chrI_187685_A_G_-	YAR030C_chrI_187685_A_G_72_2	-0.133415	-0.0400193	-1.45767	0.163556	0.470781	-5.64989	UpStream	YAR030C	YAR030C	1	TRUE	-	1	73	1	chrI	187685	A	G	TRUE	0	-1	0	1	0	0	0	NA	NA	FALSE	NA	NA	NA	379	48	11	FALSE	FALSE	FALSE	832	NA	FALSE	NA	NA	NA
chrI_187687_G_C_-	YAR030C_chrI_187687_G_C_72_2	0.0356958	-0.00509007	0.456987	0.653593	0.875227	-6.65641	UpStream	YAR030C	YAR030C	1	TRUE	-	1	73	1	chrI	187687	G	C	TRUE	0	0	1	-1	0	0	0	NA	NA	FALSE	NA	NA	NA	379	48	11	FALSE	FALSE	FALSE	834	NA	FALSE	NA	NA	NA
chrI_187734_C_T_-	YAR030C_chrI_187734_C_T_72_2	0.223958	-0.0426928	1.81461	0.0876626	0.33285	-4.91361	UpStream	YAR030C	YAR030C	1	TRUE	-	1	73	1	chrI	187734	C	T	TRUE	0	0	-1	0	1	0	0	0.772	NA	FALSE	NA	NA	NA	379	48	11	FALSE	FALSE	FALSE	881	NA	FALSE	0.228	NA	NA
chrI_189492_G_A_+	YAR035W_chrI_189492_G_A_72_2	-0.529421	-0.139392	-6.2177	1.03427e-05	0.000810903	3.53696	UpStream	YAR035W	YAR035W	1	TRUE	+	1	73	1	chrI	189492	G	A	TRUE	0	1	0	-1	0	0	0	0.462	2.83903	FALSE	NA	NA	4	474	64	17	FALSE	TRUE	FALSE	701	3.18	TRUE	0.462	0.462	TRUE
chrI_189636_A_G_+	YAR035W_chrI_189636_A_G_72_2	-0.00887595	-2.03016	-0.0978542	0.923218	0.976364	-6.72978	UpStream	YAR035W	YAR035W	1	TRUE	+	1	73	1	chrI	189636	A	G	TRUE	0	-1	0	1	0	0	0	NA	2.83903	FALSE	NA	NA	4	474	64	17	FALSE	TRUE	FALSE	557	4.19	TRUE	NA	NA	NA
chrI_189669_A_G_+	YAR035W_chrI_189669_A_G_72_2	-0.042759	-1.80865	-0.398861	0.69507	0.899733	-6.6229	UpStream	YAR035W	YAR035W	1	TRUE	+	1	73	1	chrI	189669	A	G	TRUE	0	-1	0	1	0	0	0	NA	2.83903	FALSE	NA	NA	4	474	64	17	FALSE	TRUE	FALSE	524	4.19	TRUE	NA	NA	NA
chrI_189687_TAC_T_+	YAR035W_chrI_189687_TAC_T_72_2	0.574707	-1.04612	4.60582	0.000265774	0.00766286	0.455097	UpStream	YAR035W	YAR035W	1	TRUE	+	1	72	1	chrI	189687	TAC	T	FALSE	-2	-1	-1	0	0	0	0	NA	2.83903	FALSE	NA	NA	4	474	64	17	FALSE	TRUE	FALSE	506	4.19	TRUE	NA	NA	NA
chrI_189735_T_C_+	YAR035W_chrI_189735_T_C_72_2	-0.0690175	-1.23347	-0.652039	0.523286	0.806075	-6.52145	UpStream	YAR035W	YAR035W	1	TRUE	+	1	73	1	chrI	189735	T	C	TRUE	0	0	1	0	-1	0	0	0.608	2.83903	FALSE	NA	NA	4	474	64	17	FALSE	TRUE	FALSE	458	0.28	TRUE	0.392	0.608	TRUE
chrI_189736_C_A_+	YAR035W_chrI_189736_C_A_72_2	0.341949	-1.26009	1.97036	0.06568	0.285529	-4.766	UpStream	YAR035W	YAR035W	1	TRUE	+	1	73	1	chrI	189736	C	A	TRUE	0	1	-1	0	0	0	0	0.637	2.83903	FALSE	NA	NA	4	474	64	17	FALSE	TRUE	FALSE	457	0.28	TRUE	0.363	0.637	TRUE
chrI_189764_ACACCC_A_+	YAR035W_chrI_189764_ACACCC_A_72_2	-0.0478043	-0.666649	-0.346929	0.732996	0.913029	-6.6477	UpStream	YAR035W	YAR035W	1	TRUE	+	1	70	1	chrI	189764	ACACCC	A	FALSE	-5	-1	-4	0	0	0	0	0.454	2.83903	FALSE	NA	NA	4	474	64	17	FALSE	TRUE	FALSE	429	0.28	TRUE	0.454	0.454	TRUE
chrI_192469_G_A_+	YAR042W_5UTR_0_2111	0.0287994	0.573177	0.348478	0.729882	0.88992	-6.71371	TSS	YAR042W	YAR042W	1	TRUE	+	4	38	1	chrI	192469	G	A	TRUE	0	1	0	-1	0	0	0	0.727	4.71305	FALSE	NA	NA	26	690	191	72	FALSE	TRUE	TRUE	150	NA	FALSE	0.273	0.273	FALSE
chrI_192531_C_T_+	YAR042W_5UTR_0_1211	-0.0337374	0.539001	-0.368046	0.715389	0.884612	-6.65196	TSS	YAR042W	YAR042W	1	TRUE	+	4	100	2	chrI	192531	C	T	TRUE	0	0	-1	0	1	0	0	0.893	4.71305	FALSE	NA	NA	26	690	191	72	FALSE	TRUE	TRUE	88	NA	FALSE	0.107	0.107	FALSE
chrI_192550_C_CAAAAAA_+	YAR042W_5UTR_0_1121	0.126602	0.627637	1.20655	0.23691	0.529927	-5.8719	TSS	YAR042W	YAR042W	1	TRUE	+	4	119	3	chrI	192550	C	CAAAAAA	FALSE	6	6	0	0	0	0	0	0.255	4.71305	FALSE	NA	NA	26	690	191	72	FALSE	TRUE	TRUE	69	NA	FALSE	0.255	0.255	TRUE
chrI_192551_CAAA_AAAA_+	YAR042W_5UTR_0_1112	-0.0124244	0.553071	-0.130511	0.897022	0.963022	-6.65148	TSS	YAR042W	YAR042W	1	TRUE	+	4	120	4	chrI	192551	CAAA	AAAA	FALSE	0	1	-1	0	0	0	0	0.556	4.71305	FALSE	NA	NA	26	690	191	72	FALSE	TRUE	TRUE	68	NA	FALSE	0.444	NA	NA
chrI_202631_G_A_-	YAR047C_chrI_202631_G_A_72_2	-0.815283	-0.821151	-6.54961	5.52461e-06	0.000561124	4.24474	UpStream	YAR047C	YAR047C	1	TRUE	-	1	73	1	chrI	202631	G	A	TRUE	0	1	0	-1	0	0	0	NA	NA	FALSE	NA	NA	NA	364	77	34	FALSE	FALSE	FALSE	844	NA	FALSE	NA	NA	NA
chrI_202633_G_A_+	YAR050W_chrI_202633_G_A_72_2	0.0454398	-0.51923	0.440635	0.665151	0.881804	-6.56939	UpStream	YAR050W	YAR050W	1	TRUE	+	1	73	1	chrI	202633	G	A	TRUE	0	1	0	-1	0	0	0	NA	1.33392	FALSE	NA	NA	3	594	182	47	FALSE	FALSE	FALSE	770	NA	FALSE	NA	NA	NA
chrI_202664_T_C_-	YAR047C_chrI_202664_T_C_72_2	0.284711	1.04765	3.11908	0.00637289	0.076237	-2.80643	UpStream	YAR047C	YAR047C	1	TRUE	-	1	73	1	chrI	202664	T	C	TRUE	0	0	1	0	-1	0	0	NA	NA	FALSE	NA	NA	NA	364	77	34	FALSE	FALSE	FALSE	877	NA	FALSE	NA	NA	NA
chrI_202713_TA_CA_+	YAR050W_chrI_202713_TA_CA_72_2	0.292653	-0.152342	3.12071	0.00635073	0.076237	-2.66913	UpStream	YAR050W	YAR050W	1	TRUE	+	1	73	1	chrI	202713	TA	CA	FALSE	0	0	1	0	-1	0	0	0.929	1.33392	FALSE	NA	NA	3	594	182	47	FALSE	FALSE	FALSE	690	NA	FALSE	0.071	0.071	FALSE
chrI_202732_G_A_+	YAR050W_chrI_202732_G_A_72_2	-0.0928593	0.594333	-0.823424	0.421919	0.743968	-6.39514	UpStream	YAR050W	YAR050W	1	TRUE	+	1	73	1	chrI	202732	G	A	TRUE	0	1	0	-1	0	0	0	0.937	1.33392	FALSE	NA	NA	3	594	182	47	FALSE	FALSE	FALSE	671	5.12	TRUE	0.063	0.063	FALSE
chrII_35660_T_C_+	tF(GAA)B_chrII_35660_T_C_72_2	1.06931	-1.34478	3.19208	0.00545503	0.0698525	-2.05892	UpStream	tF(GAA)B	tF(GAA)B	1	TRUE	+	1	73	1	chrII	35660	T	C	TRUE	0	0	1	0	-1	0	0	NA	NA	FALSE	NA	NA	2	NA	NA	NA	FALSE	FALSE	FALSE	738	0.36	TRUE	NA	NA	NA
chrII_35672_G_T_+	tF(GAA)B_chrII_35672_G_T_72_2	-0.0311273	-1.81063	-0.223878	0.82558	0.943397	-6.60891	UpStream	tF(GAA)B	tF(GAA)B	1	TRUE	+	1	73	1	chrII	35672	G	T	TRUE	0	0	0	-1	1	0	0	NA	NA	FALSE	NA	NA	2	NA	NA	NA	FALSE	FALSE	FALSE	726	0.36	TRUE	NA	NA	NA
chrII_35722_T_C_+	tF(GAA)B_chrII_35722_T_C_72_2	0.0522361	-1.21668	0.295191	0.771502	0.925346	-6.62918	UpStream	tF(GAA)B	tF(GAA)B	1	TRUE	+	1	73	1	chrII	35722	T	C	TRUE	0	0	1	0	-1	0	0	NA	NA	FALSE	NA	NA	2	NA	NA	NA	FALSE	FALSE	FALSE	676	0.36	TRUE	NA	NA	NA
chrII_36492_C_T_+	YBL099W_chrII_36492_C_T_72_2	-0.300599	0.534499	-3.19584	0.0054115	0.0696945	-2.44887	UpStream	YBL099W	YBL099W	1	TRUE	+	1	73	1	chrII	36492	C	T	TRUE	0	0	-1	0	1	0	0	0.604	8.82399	FALSE	NA	NA	45	NA	NA	NA	FALSE	TRUE	FALSE	561	NA	FALSE	0.396	0.604	TRUE
chrII_36507_CTT_CT_+	YBL099W_chrII_36507_CTT_CT_72_2	-0.153371	0.850484	-0.788959	0.441239	0.758029	-5.71335	UpStream	YBL099W	YBL099W	1	TRUE	+	1	72	1	chrII	36507	CTT	CT	FALSE	-1	0	0	0	-1	0	0	0.575	8.82399	FALSE	NA	NA	45	NA	NA	NA	FALSE	TRUE	FALSE	546	NA	FALSE	0.425	NA	NA
chrII_36830_A_G_+	YBL099W_chrII_36830_A_G_72_2	-0.0537794	-1.10385	-0.316664	0.755438	0.92091	-6.45619	UpStream	YBL099W	YBL099W	1	TRUE	+	1	73	1	chrII	36830	A	G	TRUE	0	-1	0	1	0	0	0	0.557	8.82399	FALSE	NA	NA	45	NA	NA	NA	FALSE	TRUE	FALSE	223	1.7	TRUE	0.443	0.557	TRUE
chrII_37424_G_A_-	YBL100C_chrII_37424_G_A_72_2	-0.105818	-0.851533	-0.820766	0.423389	0.744933	-6.44236	UpStream	YBL100C	YBL100C	1	TRUE	-	1	73	1	chrII	37424	G	A	TRUE	0	1	0	-1	0	0	0	0.735	NA	FALSE	NA	NA	NA	364	42	13	FALSE	FALSE	FALSE	121	NA	FALSE	0.265	0.265	FALSE
chrII_62747_AG_A_-	YBL086C_5UTR_0_2	0.569498	-0.853243	2.88825	0.00707495	0.0722956	-2.48148	TSS	YBL086C	YBL086C	1	TRUE	-	1	60	1	chrII	62747	AG	A	FALSE	-1	0	0	-1	0	0	0	0.046	4.19972	FALSE	0.0736847	0.0593434	6	476	122	72	FALSE	FALSE	FALSE	145	NA	FALSE	0.046	0.954	FALSE
chrII_62939_TG_T_+	YBL085W_chrII_62939_TG_T_72_2	0.437464	-0.692095	1.56498	0.136415	0.427216	-4.93207	UpStream	YBL085W	YBL085W	1	TRUE	+	1	72	1	chrII	62939	TG	T	FALSE	-1	0	0	-1	0	0	0	0.003465	5.50933	FALSE	NA	NA	71	806	133	43	FALSE	FALSE	TRUE	937	1.22	TRUE	0.003465	NA	NA
chrII_71431_G_A_-	YBL082C_chrII_71431_G_A_72_2	0.125829	-0.802027	1.11518	0.280627	0.616119	-6.13736	UpStream	YBL082C	YBL082C	1	TRUE	-	1	73	1	chrII	71431	G	A	TRUE	0	1	0	-1	0	0	0	0.369	5.55029	FALSE	NA	NA	2	1124	295	107	FALSE	TRUE	FALSE	304	NA	FALSE	0.369	0.369	TRUE
chrII_71825_CT_CTT_-	YBL082C_chrII_71825_CT_CTT_72_2	0.205708	-1.05563	2.33962	0.0320606	0.19869	-4.21885	UpStream	YBL082C	YBL082C	1	TRUE	-	1	73	1	chrII	71825	CT	CTT	FALSE	1	0	0	0	1	0	0	0.117	5.55029	FALSE	NA	NA	2	1124	295	107	FALSE	TRUE	FALSE	698	21.04	TRUE	0.117	NA	NA
chrII_74739_T_G_+	YBL079W_chrII_74739_T_G_72_2	-0.0275139	-0.758655	-0.252883	0.803458	0.93578	-6.79597	UpStream	YBL079W	YBL079W	1	TRUE	+	1	73	1	chrII	74739	T	G	TRUE	0	0	0	1	-1	0	0	0.01	5.43823	FALSE	NA	NA	40	1195	534	279	FALSE	TRUE	TRUE	520	2.74	TRUE	0.01	0.01	TRUE
chrII_75047_GA_G_+	YBL079W_chrII_75047_GA_G_72_2	0.0977473	0.702948	1.26287	0.224057	0.552905	-5.86612	UpStream	YBL079W	YBL079W	1	TRUE	+	1	72	1	chrII	75047	GA	G	FALSE	-1	-1	0	0	0	0	0	0.642	5.43823	FALSE	NA	NA	40	1195	534	279	FALSE	TRUE	TRUE	212	8.85	TRUE	0.358	0.642	TRUE
chrII_84412_AT_TT_-	YBL076C_5UTR_0_2	-0.27149	1.52276	-1.23026	0.228032	0.520456	-5.29631	TSS	YBL076C	YBL076C	1	TRUE	-	1	10	1	chrII	84412	AT	TT	FALSE	0	-1	0	0	1	0	0	0.014	7.80062	TRUE	0.0415581	0.0226394	32	1157	377	130	FALSE	TRUE	FALSE	151	4.92	TRUE	0.014	NA	NA
chrII_87849_G_A_-	YBL074C_5UTR_0_2	0.184994	-0.84971	3.39087	0.00194815	0.0303213	-2.22867	TSS	YBL074C	YBL074C	1	TRUE	-	1	96	1	chrII	87849	G	A	TRUE	0	1	0	-1	0	0	0	0.004451	3.84163	TRUE	0.173899	0.130568	15	1658	780	292	FALSE	FALSE	FALSE	60	NA	FALSE	0.004451	0.004451	TRUE
chrII_116848_G_T_+	YBL054W_chrII_116848_G_T_72_2	0.0357548	-0.633612	0.349324	0.73123	0.912799	-6.69725	UpStream	YBL054W	YBL054W	1	TRUE	+	1	73	1	chrII	116848	G	T	TRUE	0	0	0	-1	1	0	0	0.86	5.9432	FALSE	0.119956	0.0906549	13	419	123	30	FALSE	FALSE	TRUE	741	1.44	TRUE	0.14	0.14	FALSE
chrII_116939_G_A_+	YBL054W_chrII_116939_G_A_72_2	0.0187473	0.762902	0.274449	0.78712	0.93075	-6.78673	UpStream	YBL054W	YBL054W	1	TRUE	+	1	73	1	chrII	116939	G	A	TRUE	0	1	0	-1	0	0	0	0.586	5.9432	FALSE	0.119956	0.0906549	13	419	123	30	FALSE	FALSE	TRUE	650	2.99	TRUE	0.414	0.586	TRUE
chrII_116939_G_A_-	YBL055C_5UTR_0_21	0.0672506	-1.56789	0.423754	0.674728	0.867344	-6.59141	TSS	YBL055C	YBL055C	1	TRUE	-	2	95	1	chrII	116939	G	A	TRUE	0	1	0	-1	0	0	0	0.586	5.83897	FALSE	0.179371	0.129041	19	774	172	40	FALSE	TRUE	FALSE	110	2.99	TRUE	0.414	0.586	TRUE
chrII_116947_T_G_-	YBL055C_chrII_116947_T_G_72_2	-0.188701	-0.718276	-2.02087	0.0596951	0.273899	-4.69225	UpStream	YBL055C	YBL055C	1	TRUE	-	1	73	1	chrII	116947	T	G	TRUE	0	0	0	1	-1	0	0	0.776	5.83897	FALSE	0.179371	0.129041	19	774	172	40	FALSE	TRUE	FALSE	118	2.99	TRUE	0.224	0.776	TRUE
chrII_117293_GA_G_-	YBL055C_chrII_117293_GA_G_72_2	-0.0351546	1.70153	-0.381359	0.707765	0.905695	-6.56558	UpStream	YBL055C	YBL055C	1	TRUE	-	1	74	1	chrII	117293	GA	G	FALSE	-1	-1	0	0	0	0	0	0.78	5.83897	FALSE	0.179371	0.129041	19	774	172	40	FALSE	TRUE	FALSE	464	2.81	TRUE	0.22	NA	NA
chrII_124932_T_C_-	YBL051C_5UTR_0_21	-0.0146199	0.611262	-0.509468	0.614102	0.838453	-7.50824	TSS	YBL051C	YBL051C	1	TRUE	-	2	35	1	chrII	124932	T	C	TRUE	0	0	1	0	-1	0	0	0.653	5.66517	FALSE	0.105374	0.0774744	19	1444	571	240	FALSE	FALSE	FALSE	173	NA	FALSE	0.347	0.653	TRUE
chrII_124959_A_C_-	YBL051C_5UTR_0_12	-0.000839526	0.618711	-0.0279875	0.977855	0.993902	-7.66505	TSS	YBL051C	YBL051C	1	TRUE	-	2	8	2	chrII	124959	A	C	TRUE	0	-1	1	0	0	0	0	0.932	5.66517	FALSE	0.105374	0.0774744	19	1444	571	240	FALSE	FALSE	FALSE	200	NA	FALSE	0.068	0.932	TRUE
chrII_124959_A_C_+	YBL050W_chrII_124959_A_C_72_2	-0.145921	-1.43859	-2.26968	0.036839	0.21381	-4.44671	UpStream	YBL050W	YBL050W	1	TRUE	+	1	73	1	chrII	124959	A	C	TRUE	0	-1	1	0	0	0	0	0.932	7.06526	TRUE	NA	NA	40	1110	614	309	FALSE	TRUE	FALSE	166	NA	FALSE	0.068	0.932	TRUE
chrII_132199_A_G_+	YBL046W_chrII_132199_A_G_72_2	0.130822	-0.61679	0.832972	0.416663	0.741315	-5.7981	UpStream	YBL046W	YBL046W	1	TRUE	+	1	73	1	chrII	132199	A	G	TRUE	0	-1	0	1	0	0	0	0.027	5.29731	FALSE	0.145659	0.112733	14	560	70	18	FALSE	FALSE	FALSE	225	3.73	TRUE	0.027	0.027	TRUE
chrII_132280_T_C_-	YBL047C_5UTR_0_2	0.0322553	0.419856	0.279582	0.781691	0.913834	-6.25312	TSS	YBL047C	YBL047C	1	TRUE	-	1	66	1	chrII	132280	T	C	TRUE	0	0	1	0	-1	0	0	0.558	6.35339	FALSE	NA	NA	47	1147	346	138	FALSE	TRUE	FALSE	240	NA	FALSE	0.442	0.558	TRUE
chrII_135630_T_A_+	YBL044W_chrII_135630_T_A_72_2	0.0529057	-0.62173	0.326051	0.748452	0.918154	-6.62279	UpStream	YBL044W	YBL044W	1	TRUE	+	1	73	1	chrII	135630	T	A	TRUE	0	1	0	0	-1	0	0	0.808	1.21989	FALSE	NA	NA	3	102	36	14	FALSE	FALSE	FALSE	368	1.68	TRUE	0.192	0.192	FALSE
chrII_135630_T_A_-	YBL045C_chrII_135630_T_A_72_2	0.284232	-0.658862	2.33865	0.0321222	0.19869	-4.12706	UpStream	YBL045C	YBL045C	1	TRUE	-	1	73	1	chrII	135630	T	A	TRUE	0	1	0	0	-1	0	0	0.808	7.90294	FALSE	0.0693624	0.0421927	108	NA	NA	NA	FALSE	FALSE	FALSE	114	1.68	TRUE	0.192	0.192	FALSE
chrII_135667_A_C_-	YBL045C_chrII_135667_A_C_72_2	0.980358	-1.11419	2.30331	0.034464	0.205394	-3.52125	UpStream	YBL045C	YBL045C	1	TRUE	-	1	73	1	chrII	135667	A	C	TRUE	0	-1	1	0	0	0	0	0.783	7.90294	FALSE	0.0693624	0.0421927	108	NA	NA	NA	FALSE	FALSE	FALSE	151	1.68	TRUE	0.217	0.783	TRUE
chrII_135827_G_A_-	YBL045C_5UTR_0_2	-0.051159	-0.465697	-0.6042	0.550193	0.79282	-6.62277	TSS	YBL045C	YBL045C	1	TRUE	-	1	20	1	chrII	135827	G	A	TRUE	0	1	0	-1	0	0	0	0.654	7.90294	FALSE	0.0693624	0.0421927	108	NA	NA	NA	FALSE	FALSE	FALSE	311	NA	FALSE	0.346	0.654	TRUE
chrII_135827_G_A_+	YBL044W_chrII_135827_G_A_72_2	0.0700957	1.00165	0.38241	0.707	0.905618	-6.0793	UpStream	YBL044W	YBL044W	1	TRUE	+	1	73	1	chrII	135827	G	A	TRUE	0	1	0	-1	0	0	0	0.654	1.21989	FALSE	NA	NA	3	102	36	14	FALSE	FALSE	FALSE	171	NA	FALSE	0.346	0.654	TRUE
chrII_135923_C_T_-	YBL045C_chrII_135923_C_T_72_2	0.246214	0.702155	2.48742	0.0238061	0.164425	-3.87058	UpStream	YBL045C	YBL045C	1	TRUE	-	1	73	1	chrII	135923	C	T	TRUE	0	0	-1	0	1	0	0	0.749	7.90294	FALSE	0.0693624	0.0421927	108	NA	NA	NA	FALSE	FALSE	FALSE	407	2.18	TRUE	0.251	0.251	FALSE
chrII_140383_A_G_-	YBL042C_5UTR_0_2	-0.211047	1.29267	-2.75371	0.00985049	0.089981	-3.18436	TSS	YBL042C	YBL042C	1	TRUE	-	1	78	1	chrII	140383	A	G	TRUE	0	-1	0	1	0	0	0	0.666	5.48998	FALSE	NA	NA	8	782	129	31	FALSE	FALSE	FALSE	123	3.96	TRUE	0.334	0.666	TRUE
chrII_140383_A_G_+	YBL041W_chrII_140383_A_G_72_2	0.423161	-1.1476	1.87908	0.0778745	0.309903	-4.48084	UpStream	YBL041W	YBL041W	1	TRUE	+	1	73	1	chrII	140383	A	G	TRUE	0	-1	0	1	0	0	0	0.666	7.86646	TRUE	NA	NA	27	1445	720	322	FALSE	TRUE	FALSE	864	3.96	TRUE	0.334	0.666	TRUE
chrII_140643_C_A_-	YBL042C_chrII_140643_C_A_72_2	0.0355412	2.34816	0.608876	0.550834	0.821419	-6.65299	UpStream	YBL042C	YBL042C	1	TRUE	-	1	73	1	chrII	140643	C	A	TRUE	0	1	-1	0	0	0	0	0.79	5.48998	FALSE	NA	NA	8	782	129	31	FALSE	FALSE	FALSE	383	1.21	TRUE	0.21	0.21	FALSE
chrII_140850_TG_T_-	YBL042C_chrII_140850_TG_T_72_2	-0.11971	-0.946762	-0.9419	0.359726	0.692639	-6.22323	UpStream	YBL042C	YBL042C	1	TRUE	-	1	74	1	chrII	140850	TG	T	FALSE	-1	0	0	-1	0	0	0	0.698	5.48998	FALSE	NA	NA	8	782	129	31	FALSE	FALSE	FALSE	590	NA	FALSE	0.302	NA	NA
chrII_140863_G_T_-	YBL042C_chrII_140863_G_T_72_2	0.00830486	-0.602017	0.0652455	0.948756	0.982285	-6.71917	UpStream	YBL042C	YBL042C	1	TRUE	-	1	73	1	chrII	140863	G	T	TRUE	0	0	0	-1	1	0	0	0.206	5.48998	FALSE	NA	NA	8	782	129	31	FALSE	FALSE	FALSE	603	NA	FALSE	0.206	0.206	TRUE
chrII_140964_T_TC_-	YBL042C_chrII_140964_T_TC_72_2	0.0221205	-0.941851	0.179558	0.859669	0.953981	-6.8108	UpStream	YBL042C	YBL042C	1	TRUE	-	1	73	1	chrII	140964	T	TC	FALSE	1	0	1	0	0	0	0	0.662	5.48998	FALSE	NA	NA	8	782	129	31	FALSE	FALSE	FALSE	704	1.2	TRUE	0.338	0.662	TRUE
chrII_141015_G_A_+	YBL041W_chrII_141015_G_A_72_2	-0.171806	-0.0205497	-1.57782	0.133436	0.42173	-5.27153	UpStream	YBL041W	YBL041W	1	TRUE	+	1	73	1	chrII	141015	G	A	TRUE	0	1	0	-1	0	0	0	0.845	7.86646	TRUE	NA	NA	27	1445	720	322	FALSE	TRUE	FALSE	232	1.2	TRUE	0.155	0.155	FALSE
chrII_141015_G_A_-	YBL042C_chrII_141015_G_A_72_2	0.273339	-0.912334	0.768203	0.453138	0.765912	-5.35655	UpStream	YBL042C	YBL042C	1	TRUE	-	1	73	1	chrII	141015	G	A	TRUE	0	1	0	-1	0	0	0	0.845	5.48998	FALSE	NA	NA	8	782	129	31	FALSE	FALSE	FALSE	755	1.2	TRUE	0.155	0.155	FALSE
chrII_141175_C_T_+	YBL041W_5UTR_0_211	0.16189	0.882308	4.21158	0.000208386	0.00501946	-0.25712	TSS	YBL041W	YBL041W	1	TRUE	+	3	108	1	chrII	141175	C	T	TRUE	0	0	-1	0	1	0	0	0.838	7.86646	TRUE	NA	NA	27	1445	720	322	FALSE	TRUE	FALSE	72	1.56	TRUE	0.162	0.162	FALSE
chrII_141175_C_T_-	YBL042C_chrII_141175_C_T_72_2	-0.369125	-0.239765	-2.57901	0.0197465	0.150422	-3.57276	UpStream	YBL042C	YBL042C	1	TRUE	-	1	73	1	chrII	141175	C	T	TRUE	0	0	-1	0	1	0	0	0.838	5.48998	FALSE	NA	NA	8	782	129	31	FALSE	FALSE	FALSE	915	1.56	TRUE	0.162	0.162	FALSE
chrII_141191_G_A_+	YBL041W_5UTR_0_121	0.0135897	0.80734	0.33742	0.738119	0.894288	-7.36913	TSS	YBL041W	YBL041W	1	TRUE	+	3	124	2	chrII	141191	G	A	TRUE	0	1	0	-1	0	0	0	0.838	7.86646	TRUE	NA	NA	27	1445	720	322	FALSE	TRUE	FALSE	56	1.56	TRUE	0.162	0.162	FALSE
chrII_141191_G_A_-	YBL042C_chrII_141191_G_A_72_2	0.0119856	-1.20778	0.142165	0.888658	0.963235	-6.79492	UpStream	YBL042C	YBL042C	1	TRUE	-	1	73	1	chrII	141191	G	A	TRUE	0	1	0	-1	0	0	0	0.838	5.48998	FALSE	NA	NA	8	782	129	31	FALSE	FALSE	FALSE	931	1.56	TRUE	0.162	0.162	FALSE
chrII_141207_A_G_-	YBL042C_chrII_141207_A_G_72_2	0.24502	-1.13549	1.50352	0.151457	0.450042	-5.33551	UpStream	YBL042C	YBL042C	1	TRUE	-	1	73	1	chrII	141207	A	G	TRUE	0	-1	0	1	0	0	0	0.704	5.48998	FALSE	NA	NA	8	782	129	31	FALSE	FALSE	FALSE	947	1.56	TRUE	0.296	0.704	TRUE
chrII_141207_A_G_+	YBL041W_5UTR_0_112	-0.0860052	0.758045	-2.2776	0.0299429	0.174427	-4.92319	TSS	YBL041W	YBL041W	1	TRUE	+	3	140	3	chrII	141207	A	G	TRUE	0	-1	0	1	0	0	0	0.704	7.86646	TRUE	NA	NA	27	1445	720	322	FALSE	TRUE	FALSE	40	1.56	TRUE	0.296	0.704	TRUE
chrII_141215_C_T_-	YBL042C_chrII_141215_C_T_72_2	0.355863	-0.333198	1.26881	0.22198	0.55013	-5.09118	UpStream	YBL042C	YBL042C	1	TRUE	-	1	73	1	chrII	141215	C	T	TRUE	0	0	-1	0	1	0	0	0.704	5.48998	FALSE	NA	NA	8	782	129	31	FALSE	FALSE	FALSE	955	0.41	TRUE	0.296	0.704	TRUE
chrII_143298_A_T_+	YBL039W-B_chrII_143298_A_T_72_2	0.0510666	-1.35865	0.514228	0.613858	0.857885	-6.62005	UpStream	YBL039W-B	YBL039W-B	1	TRUE	+	1	73	1	chrII	143298	A	T	TRUE	0	-1	0	0	1	0	0	0.649	4.99785	FALSE	NA	NA	3	454	92	33	FALSE	FALSE	FALSE	95	6.63	TRUE	0.351	0.649	TRUE
chrII_143327_C_T_-	YBL040C_chrII_143327_C_T_72_2	0.279364	-1.73918	1.27598	0.219497	0.54803	-5.34301	UpStream	YBL040C	YBL040C	1	TRUE	-	1	73	1	chrII	143327	C	T	TRUE	0	0	-1	0	1	0	0	0.672	7.38446	TRUE	NA	NA	9	449	195	107	FALSE	TRUE	FALSE	459	6.63	TRUE	0.328	0.672	TRUE
chrII_145474_A_G_-	YBL039C-A_chrII_145474_A_G_72_2	-0.138608	-0.557329	-1.21608	0.240935	0.576105	-5.98807	UpStream	YBL039C-A	YBL039C-A	1	TRUE	-	1	73	1	chrII	145474	A	G	TRUE	0	-1	0	1	0	0	0	0.895	NA	FALSE	NA	NA	NA	NA	NA	NA	FALSE	FALSE	FALSE	443	4.68	TRUE	0.105	0.105	FALSE
chrII_145980_G_T_+	YBL038W_chrII_145980_G_T_72_2	-0.0787963	0.60664	-1.09429	0.289425	0.625455	-6.03156	UpStream	YBL038W	YBL038W	1	TRUE	+	1	73	1	chrII	145980	G	T	TRUE	0	0	0	-1	1	0	0	0.485	6.88957	FALSE	0.079257	0.0568844	37	NA	NA	NA	FALSE	FALSE	FALSE	207	9.65	TRUE	0.485	0.485	TRUE
chrII_146099_C_T_+	YBL038W_chrII_146099_C_T_72_2	-0.118894	-0.594478	-0.982508	0.339928	0.67728	-6.26906	UpStream	YBL038W	YBL038W	1	TRUE	+	1	73	1	chrII	146099	C	T	TRUE	0	0	-1	0	1	0	0	0.783	6.88957	FALSE	0.079257	0.0568844	37	NA	NA	NA	FALSE	FALSE	FALSE	88	5.14	TRUE	0.217	0.783	TRUE
chrII_146107_C_A_+	YBL038W_chrII_146107_C_A_72_2	0.0419618	-0.636568	0.338689	0.739082	0.91444	-6.72556	UpStream	YBL038W	YBL038W	1	TRUE	+	1	73	1	chrII	146107	C	A	TRUE	0	1	-1	0	0	0	0	0.873	6.88957	FALSE	0.079257	0.0568844	37	NA	NA	NA	FALSE	FALSE	FALSE	80	5.14	TRUE	0.127	0.127	FALSE
chrII_146113_A_T_+	YBL038W_chrII_146113_A_T_72_2	0.030759	-0.790967	0.158512	0.875962	0.956749	-6.4652	UpStream	YBL038W	YBL038W	1	TRUE	+	1	73	1	chrII	146113	A	T	TRUE	0	-1	0	0	1	0	0	0.609	6.88957	FALSE	0.079257	0.0568844	37	NA	NA	NA	FALSE	FALSE	FALSE	74	5.14	TRUE	0.391	0.609	TRUE
chrII_146114_C_T_+	YBL038W_chrII_146114_C_T_72_2	-0.0818971	-0.746317	-0.731004	0.474951	0.7826	-6.50116	UpStream	YBL038W	YBL038W	1	TRUE	+	1	73	1	chrII	146114	C	T	TRUE	0	0	-1	0	1	0	0	0.807	6.88957	FALSE	0.079257	0.0568844	37	NA	NA	NA	FALSE	FALSE	FALSE	73	5.14	TRUE	0.193	0.807	TRUE
chrII_146992_C_T_+	YBL037W_5UTR_0_2	-0.0809776	-0.600835	-1.26084	0.216957	0.508658	-6.30544	TSS	YBL037W	YBL037W	1	TRUE	+	1	26	1	chrII	146992	C	T	TRUE	0	0	-1	0	1	0	0	0.559	4.5466	FALSE	0.0570122	0.0421326	32	717	144	40	FALSE	TRUE	FALSE	217	NA	FALSE	0.441	0.441	FALSE
chrII_151407_G_T_-	YBL036C_chrII_151407_G_T_72_2	0.0376482	-0.320746	0.535445	0.59943	0.848544	-6.71766	UpStream	YBL036C	YBL036C	1	TRUE	-	1	73	1	chrII	151407	G	T	TRUE	0	0	0	-1	1	0	1	0.812	7.12398	FALSE	0.103322	0.0785722	13	426	105	44	FALSE	TRUE	FALSE	187	2.08	TRUE	0.188	0.812	TRUE
chrII_153787_T_A_-	YBL035C_5UTR_0_21	0.421589	-0.88443	2.07745	0.0463001	0.227541	-4.44959	TSS	YBL035C	YBL035C	1	TRUE	-	2	49	1	chrII	153787	T	A	TRUE	0	1	0	0	-1	0	0	0.66	5.15898	TRUE	NA	NA	23	1439	731	379	FALSE	TRUE	FALSE	177	NA	FALSE	0.34	0.66	TRUE
chrII_153815_TA_T_-	YBL035C_5UTR_0_12	0.423706	-0.870846	2.15467	0.0392285	0.210466	-4.23101	TSS	YBL035C	YBL035C	1	TRUE	-	2	21	2	chrII	153815	TA	T	FALSE	-1	-1	0	0	0	0	0	0.258	5.15898	TRUE	NA	NA	23	1439	731	379	FALSE	TRUE	FALSE	205	NA	FALSE	0.258	0.742	FALSE
chrII_158591_C_T_-	YBL034C_chrII_158591_C_T_72_2	0.0414101	-0.730236	0.599525	0.556903	0.825823	-6.61978	UpStream	YBL034C	YBL034C	1	TRUE	-	1	73	1	chrII	158591	C	T	TRUE	0	0	-1	0	1	0	-1	0.936	3.55043	TRUE	0.128742	0.0940523	20	2917	1151	567	FALSE	FALSE	FALSE	202	NA	FALSE	0.064	0.064	FALSE
chrII_159797_C_T_-	YBL033C_chrII_159797_C_T_72_2	0.128538	-0.049162	1.16579	0.260146	0.594372	-5.91205	UpStream	YBL033C	YBL033C	1	TRUE	-	1	73	1	chrII	159797	C	T	TRUE	0	0	-1	0	1	0	0	0.567	6.35625	FALSE	0.0796126	0.0648722	6	NA	NA	NA	FALSE	FALSE	FALSE	104	NA	FALSE	0.433	0.567	TRUE
chrII_159857_C_G_-	YBL033C_chrII_159857_C_G_72_2	-0.029063	0.543308	-0.477846	0.63898	0.870178	-6.71058	UpStream	YBL033C	YBL033C	1	TRUE	-	1	73	1	chrII	159857	C	G	TRUE	0	0	-1	1	0	0	0	0.833	6.35625	FALSE	0.0796126	0.0648722	6	NA	NA	NA	FALSE	FALSE	FALSE	164	NA	FALSE	0.167	0.833	TRUE
chrII_159870_GA_G_-	YBL033C_chrII_159870_GA_G_72_2	0.124534	0.980713	1.30639	0.209198	0.535138	-5.66636	UpStream	YBL033C	YBL033C	1	TRUE	-	1	74	1	chrII	159870	GA	G	FALSE	-1	-1	0	0	0	0	0	0.003462	6.35625	FALSE	0.0796126	0.0648722	6	NA	NA	NA	FALSE	FALSE	FALSE	177	NA	FALSE	0.003462	0.003462	TRUE
chrII_159891_A_C_-	YBL033C_chrII_159891_A_C_72_2	0.0138689	0.119796	0.145532	0.88604	0.96203	-6.64934	UpStream	YBL033C	YBL033C	1	TRUE	-	1	73	1	chrII	159891	A	C	TRUE	0	-1	1	0	0	0	0	0.687	6.35625	FALSE	0.0796126	0.0648722	6	NA	NA	NA	FALSE	FALSE	FALSE	198	5.64	TRUE	0.313	0.687	TRUE
chrII_159926_C_A_-	YBL033C_chrII_159926_C_A_72_2	0.069078	0.778217	1.00386	0.329829	0.667397	-6.25069	UpStream	YBL033C	YBL033C	1	TRUE	-	1	73	1	chrII	159926	C	A	TRUE	0	1	-1	0	0	0	0	0.811	6.35625	FALSE	0.0796126	0.0648722	6	NA	NA	NA	FALSE	FALSE	FALSE	233	5.64	TRUE	0.189	0.811	TRUE
chrII_160143_T_G_-	YBL033C_chrII_160143_T_G_72_2	0.0537338	0.916797	0.35102	0.729981	0.912385	-6.19933	UpStream	YBL033C	YBL033C	1	TRUE	-	1	73	1	chrII	160143	T	G	TRUE	0	0	0	1	-1	0	0	0.997	6.35625	FALSE	0.0796126	0.0648722	6	NA	NA	NA	FALSE	FALSE	FALSE	450	10.19	TRUE	0.003	0.003	FALSE
chrII_164378_T_C_-	YBL030C_chrII_164378_T_C_72_2	-0.154681	0.241154	-2.13752	0.0477196	0.248089	-4.68668	UpStream	YBL030C	YBL030C	1	TRUE	-	1	73	1	chrII	164378	T	C	TRUE	0	0	1	0	-1	0	0	0.551	9.42607	TRUE	0.0693478	0.0226002	75	NA	NA	NA	FALSE	TRUE	TRUE	381	3.58	TRUE	0.449	0.551	TRUE
chrII_164419_T_C_-	YBL030C_chrII_164419_T_C_72_2	0.0898479	0.433728	0.389514	0.701838	0.903196	-6.0006	UpStream	YBL030C	YBL030C	1	TRUE	-	1	73	1	chrII	164419	T	C	TRUE	0	0	1	0	-1	0	0	0.758	9.42607	TRUE	0.0693478	0.0226002	75	NA	NA	NA	FALSE	TRUE	TRUE	422	3.58	TRUE	0.242	0.758	TRUE
chrII_164914_A_G_-	YBL029C-A_5UTR_0_2	0.173832	-0.868029	0.927111	0.36117	0.657164	-5.75858	TSS	YBL029C-A	YBL029C-A	1	TRUE	-	1	72	1	chrII	164914	A	G	TRUE	0	-1	0	1	0	0	0	0.611	6.23501	FALSE	NA	NA	14	493	46	18	FALSE	FALSE	FALSE	142	0.4	TRUE	0.389	0.611	TRUE
chrII_164995_T_G_-	YBL029C-A_chrII_164995_T_G_72_2	-0.169354	0.654489	-1.93664	0.0699692	0.297667	-4.87548	UpStream	YBL029C-A	YBL029C-A	1	TRUE	-	1	73	1	chrII	164995	T	G	TRUE	0	0	0	1	-1	0	0	0.852	6.23501	FALSE	NA	NA	14	493	46	18	FALSE	FALSE	FALSE	223	NA	FALSE	0.148	0.148	FALSE
chrII_165107_A_G_-	YBL029C-A_chrII_165107_A_G_72_2	0.805207	1.24253	1.44634	0.166666	0.475886	-4.75373	UpStream	YBL029C-A	YBL029C-A	1	TRUE	-	1	73	1	chrII	165107	A	G	TRUE	0	-1	0	1	0	0	0	0.609	6.23501	FALSE	NA	NA	14	493	46	18	FALSE	FALSE	FALSE	335	NA	FALSE	0.391	0.609	TRUE
chrII_170442_T_C_+	YBL026W_5UTR_0_2	-0.265461	0.434936	-2.76265	0.0096384	0.0893194	-3.10459	TSS	YBL026W	YBL026W	1	TRUE	+	1	35	1	chrII	170442	T	C	TRUE	0	0	1	0	-1	0	0	0.752	7.62371	TRUE	NA	NA	88	1478	529	232	FALSE	TRUE	FALSE	181	NA	FALSE	0.248	0.248	FALSE
chrII_172028_G_C_+	YBL024W_chrII_172028_G_C_72_2	-0.0955905	-0.632381	-0.751493	0.462859	0.772411	-6.3983	UpStream	YBL024W	YBL024W	1	TRUE	+	1	73	1	chrII	172028	G	C	TRUE	0	0	1	-1	0	0	0	0.719	6.77094	FALSE	0.0510756	0.03163	37	959	251	92	FALSE	TRUE	FALSE	506	4.59	TRUE	0.281	0.719	TRUE
chrII_172113_T_C_+	YBL024W_chrII_172113_T_C_72_2	-0.311849	-0.736996	-1.14114	0.269977	0.604473	-5.23147	UpStream	YBL024W	YBL024W	1	TRUE	+	1	73	1	chrII	172113	T	C	TRUE	0	0	1	0	-1	0	0	0.845	6.77094	FALSE	0.0510756	0.03163	37	959	251	92	FALSE	TRUE	FALSE	421	4.59	TRUE	0.155	0.155	FALSE
chrII_172223_A_G_+	YBL024W_chrII_172223_A_G_72_2	0.0465073	-0.353319	0.667727	0.513468	0.800341	-6.60447	UpStream	YBL024W	YBL024W	1	TRUE	+	1	73	1	chrII	172223	A	G	TRUE	0	-1	0	1	0	0	0	0.83	6.77094	FALSE	0.0510756	0.03163	37	959	251	92	FALSE	TRUE	FALSE	311	3	TRUE	0.17	0.17	FALSE
chrII_172245_C_T_+	YBL024W_chrII_172245_C_T_72_2	-0.046589	-0.841682	-0.438512	0.666658	0.882754	-6.57519	UpStream	YBL024W	YBL024W	1	TRUE	+	1	73	1	chrII	172245	C	T	TRUE	0	0	-1	0	1	0	0	0.87	6.77094	FALSE	0.0510756	0.03163	37	959	251	92	FALSE	TRUE	FALSE	289	3	TRUE	0.13	0.13	FALSE
chrII_172262_A_G_+	YBL024W_chrII_172262_A_G_72_2	0.135868	-0.867123	1.24904	0.228946	0.559715	-5.92089	UpStream	YBL024W	YBL024W	1	TRUE	+	1	73	1	chrII	172262	A	G	TRUE	0	-1	0	1	0	0	0	0.831	6.77094	FALSE	0.0510756	0.03163	37	959	251	92	FALSE	TRUE	FALSE	272	3	TRUE	0.169	0.169	FALSE
chrII_172346_A_T_+	YBL024W_chrII_172346_A_T_72_2	0.017515	0.831464	0.246772	0.808105	0.936944	-6.71154	UpStream	YBL024W	YBL024W	1	TRUE	+	1	73	1	chrII	172346	A	T	TRUE	0	-1	0	0	1	0	0	0.643	6.77094	FALSE	0.0510756	0.03163	37	959	251	92	FALSE	TRUE	FALSE	188	NA	FALSE	0.357	0.643	TRUE
chrII_172488_A_G_+	YBL024W_5UTR_0_2	-0.029032	0.499469	-0.194465	0.847105	0.941458	-6.46915	TSS	YBL024W	YBL024W	1	TRUE	+	1	122	1	chrII	172488	A	G	TRUE	0	-1	0	1	0	0	0	0.867	6.77094	FALSE	0.0510756	0.03163	37	959	251	92	FALSE	TRUE	FALSE	46	2.32	TRUE	0.133	0.133	FALSE
chrII_177622_G_A_-	YBL023C_5UTR_0_2	0.317531	-0.0346483	1.33309	0.192406	0.477856	-5.07974	TSS	YBL023C	YBL023C	1	TRUE	-	1	102	1	chrII	177622	G	A	TRUE	0	1	0	-1	0	0	0	0.833	4.93379	TRUE	0.0212697	0.0149082	74	990	241	77	FALSE	TRUE	FALSE	96	7.03	TRUE	0.167	0.833	TRUE
chrII_182128_T_C_+	YBL020W_chrII_182128_T_C_72_2	-0.221228	0.187174	-2.53126	0.0217729	0.156436	-3.73517	UpStream	YBL020W	YBL020W	1	TRUE	+	1	73	1	chrII	182128	T	C	TRUE	0	0	1	0	-1	0	0	0.989	5.37796	TRUE	NA	NA	6	1156	900	549	FALSE	TRUE	FALSE	273	10.17	TRUE	0.011	0.011	FALSE
chrII_182128_T_C_-	YBL021C_5UTR_0_21	0.0457973	-0.318438	0.503317	0.618368	0.841112	-6.55363	TSS	YBL021C	YBL021C	1	TRUE	-	2	135	1	chrII	182128	T	C	TRUE	0	0	1	0	-1	0	0	0.989	5.49996	FALSE	0.0269375	0.0222419	9	1369	654	301	TRUE	TRUE	FALSE	34	10.17	TRUE	0.011	0.011	FALSE
chrII_182137_G_T_-	YBL021C_5UTR_0_12	0.0600294	-0.317806	0.727886	0.472252	0.741006	-6.51968	TSS	YBL021C	YBL021C	1	TRUE	-	2	126	2	chrII	182137	G	T	TRUE	0	0	0	-1	1	0	0	0.764	5.49996	FALSE	0.0269375	0.0222419	9	1369	654	301	TRUE	TRUE	FALSE	43	10.17	TRUE	0.236	0.236	FALSE
chrII_182137_G_T_+	YBL020W_chrII_182137_G_T_72_2	-0.0233773	0.541037	-0.246513	0.808302	0.936944	-6.57527	UpStream	YBL020W	YBL020W	1	TRUE	+	1	73	1	chrII	182137	G	T	TRUE	0	0	0	-1	1	0	0	0.764	5.37796	TRUE	NA	NA	6	1156	900	549	FALSE	TRUE	FALSE	264	10.17	TRUE	0.236	0.236	FALSE
chrII_182323_C_G_+	YBL020W_chrII_182323_C_G_72_2	-0.289562	-1.30971	-1.82714	0.0856804	0.328443	-4.99053	UpStream	YBL020W	YBL020W	1	TRUE	+	1	73	1	chrII	182323	C	G	TRUE	0	0	-1	1	0	0	0	0.579	5.37796	TRUE	NA	NA	6	1156	900	549	FALSE	TRUE	FALSE	78	21.63	TRUE	0.421	0.579	TRUE
chrII_184249_T_C_+	YBL019W_chrII_184249_T_C_72_2	0.705416	-1.03778	5.46534	4.52531e-05	0.00210662	2.1544	UpStream	YBL019W	YBL019W	1	TRUE	+	1	73	1	chrII	184249	T	C	TRUE	0	0	1	0	-1	0	0	0.85	4.32829	FALSE	NA	NA	3	484	116	33	FALSE	TRUE	FALSE	104	NA	FALSE	0.15	0.85	TRUE
chrII_186525_A_G_-	YBL018C_5UTR_0_211	0.0279834	-0.653525	0.138168	0.891019	0.959045	-6.07895	TSS	YBL018C	YBL018C	1	TRUE	-	3	135	1	chrII	186525	A	G	TRUE	0	-1	0	1	0	0	0	0.581	6.22217	TRUE	NA	NA	10	NA	NA	NA	FALSE	FALSE	FALSE	51	2.16	TRUE	0.419	0.581	TRUE
chrII_186623_C_T_-	YBL018C_5UTR_0_121	-0.449533	-0.844899	-1.61605	0.116413	0.371558	-4.89768	TSS	YBL018C	YBL018C	1	TRUE	-	3	37	2	chrII	186623	C	T	TRUE	0	0	-1	0	1	0	0	0.856	6.22217	TRUE	NA	NA	10	NA	NA	NA	FALSE	FALSE	FALSE	149	NA	FALSE	0.144	0.856	TRUE
chrII_186648_C_G_-	YBL018C_5UTR_0_112	-0.123246	-0.709026	-0.703778	0.486926	0.749402	-5.99754	TSS	YBL018C	YBL018C	1	TRUE	-	3	12	3	chrII	186648	C	G	TRUE	0	0	-1	1	0	0	0	0.857	6.22217	TRUE	NA	NA	10	NA	NA	NA	FALSE	FALSE	FALSE	174	NA	FALSE	0.143	0.857	TRUE
chrII_186778_A_G_-	YBL018C_chrII_186778_A_G_72_2	-0.0373647	-2.34633	-0.306525	0.763009	0.922329	-6.69456	UpStream	YBL018C	YBL018C	1	TRUE	-	1	73	1	chrII	186778	A	G	TRUE	0	-1	0	1	0	0	0	0.856	6.22217	TRUE	NA	NA	10	NA	NA	NA	FALSE	FALSE	FALSE	304	7.25	TRUE	0.144	0.856	TRUE
chrII_191688_GA_G_-	YBL017C_chrII_191688_GA_G_72_2	0.0242179	-0.556479	0.273642	0.787729	0.93075	-6.5208	UpStream	YBL017C	YBL017C	1	TRUE	-	1	74	1	chrII	191688	GA	G	FALSE	-1	-1	0	0	0	0	0	0.448	5.7414	FALSE	NA	NA	40	616	273	107	FALSE	TRUE	FALSE	105	2.39	TRUE	0.448	0.448	TRUE
chrII_191751_C_T_-	YBL017C_chrII_191751_C_T_72_2	-0.0732024	-0.694008	-0.708555	0.488414	0.790336	-6.57607	UpStream	YBL017C	YBL017C	1	TRUE	-	1	73	1	chrII	191751	C	T	TRUE	0	0	-1	0	1	0	0	0.557	5.7414	FALSE	NA	NA	40	616	273	107	FALSE	TRUE	FALSE	168	2.39	TRUE	0.443	0.557	TRUE
chrII_191763_G_T_+	YBL016W_chrII_191763_G_T_72_2	0.123942	-0.141202	1.2616	0.224502	0.553391	-5.83276	UpStream	YBL016W	YBL016W	1	TRUE	+	1	73	1	chrII	191763	G	T	TRUE	0	0	0	-1	1	0	0	0.016	6.6028	FALSE	NA	NA	125	NA	NA	NA	FALSE	TRUE	FALSE	688	2.39	TRUE	0.016	0.016	TRUE
chrII_191763_G_T_-	YBL017C_chrII_191763_G_T_72_2	0.0896159	-0.897383	0.932666	0.364336	0.696965	-6.355	UpStream	YBL017C	YBL017C	1	TRUE	-	1	73	1	chrII	191763	G	T	TRUE	0	0	0	-1	1	0	0	0.016	5.7414	FALSE	NA	NA	40	616	273	107	FALSE	TRUE	FALSE	180	2.39	TRUE	0.016	0.016	TRUE
chrII_191777_G_GT_-	YBL017C_chrII_191777_G_GT_72_2	0.0704276	-1.04277	0.944998	0.358188	0.691175	-6.4254	UpStream	YBL017C	YBL017C	1	TRUE	-	1	73	1	chrII	191777	G	GT	FALSE	1	0	0	0	1	0	0	0.577	5.7414	FALSE	NA	NA	40	616	273	107	FALSE	TRUE	FALSE	194	2.39	TRUE	0.423	0.577	TRUE
chrII_192085_A_G_-	YBL017C_chrII_192085_A_G_72_2	0.000216429	-0.489733	0.00173109	0.998639	0.999173	-6.79163	UpStream	YBL017C	YBL017C	1	TRUE	-	1	73	1	chrII	192085	A	G	TRUE	0	-1	0	1	0	0	0	0.558	5.7414	FALSE	NA	NA	40	616	273	107	FALSE	TRUE	FALSE	502	1.41	TRUE	0.442	0.558	TRUE
chrII_192232_CTT_C_-	YBL017C_chrII_192232_CTT_C_72_2	-0.0361878	0.523599	-0.487492	0.632274	0.867672	-6.64209	UpStream	YBL017C	YBL017C	1	TRUE	-	1	74	1	chrII	192232	CTT	C	FALSE	-2	0	0	0	-2	0	0	0.143	5.7414	FALSE	NA	NA	40	616	273	107	FALSE	TRUE	FALSE	649	NA	FALSE	0.143	NA	NA
chrII_192232_CTT_C_+	YBL016W_chrII_192232_CTT_C_72_2	-0.13154	0.424427	-1.44347	0.16746	0.477283	-5.58804	UpStream	YBL016W	YBL016W	1	TRUE	+	1	72	1	chrII	192232	CTT	C	FALSE	-2	0	0	0	-2	0	0	0.143	6.6028	FALSE	NA	NA	125	NA	NA	NA	FALSE	TRUE	FALSE	219	NA	FALSE	0.143	NA	NA
chrII_192289_G_C_-	YBL017C_chrII_192289_G_C_72_2	0.0968276	1.09426	1.35731	0.192818	0.513705	-5.78377	UpStream	YBL017C	YBL017C	1	TRUE	-	1	73	1	chrII	192289	G	C	TRUE	0	0	1	-1	0	0	0	0.997	5.7414	FALSE	NA	NA	40	616	273	107	FALSE	TRUE	FALSE	706	NA	FALSE	0.003	0.003	FALSE
chrII_192390_C_T_-	YBL017C_chrII_192390_C_T_72_2	0.319914	-1.2711	1.83236	0.0848661	0.32619	-4.76213	UpStream	YBL017C	YBL017C	1	TRUE	-	1	73	1	chrII	192390	C	T	TRUE	0	0	-1	0	1	0	0	0.367	5.7414	FALSE	NA	NA	40	616	273	107	FALSE	TRUE	FALSE	807	0.67	TRUE	0.367	0.367	TRUE
chrII_193546_C_CAAT_+	YBL015W_chrII_193546_C_CAAT_72_2	-0.220824	-2.62176	-2.21418	0.0410937	0.226763	-4.41014	UpStream	YBL015W	YBL015W	1	TRUE	+	1	73	1	chrII	193546	C	CAAT	FALSE	3	2	0	0	1	0	0	0.898	5.38427	FALSE	NA	NA	9	858	241	90	FALSE	FALSE	FALSE	576	6.86	TRUE	0.102	0.102	FALSE
chrII_193664_T_C_+	YBL015W_chrII_193664_T_C_72_2	0.27149	-0.965535	1.63612	0.120596	0.401673	-5.33347	UpStream	YBL015W	YBL015W	1	TRUE	+	1	73	1	chrII	193664	T	C	TRUE	0	0	1	0	-1	0	0	0.868	5.38427	FALSE	NA	NA	9	858	241	90	FALSE	FALSE	FALSE	458	10.34	TRUE	0.132	0.132	FALSE
chrII_193715_GAA_GAAA_+	YBL015W_chrII_193715_GAA_GAAA_72_2	0.108598	0.334417	0.899768	0.381088	0.712884	-6.16545	UpStream	YBL015W	YBL015W	1	TRUE	+	1	73	1	chrII	193715	GAA	GAAA	FALSE	1	1	0	0	0	0	0	0.74	5.38427	FALSE	NA	NA	9	858	241	90	FALSE	FALSE	FALSE	407	10.34	TRUE	0.26	0.26	FALSE
chrII_193867_C_T_+	YBL015W_chrII_193867_C_T_72_2	-0.37976	0.405384	-6.78535	3.57144e-06	0.000399019	4.51544	UpStream	YBL015W	YBL015W	1	TRUE	+	1	73	1	chrII	193867	C	T	TRUE	0	0	-1	0	1	0	0	0.507	5.38427	FALSE	NA	NA	9	858	241	90	FALSE	FALSE	FALSE	255	NA	FALSE	0.493	0.507	TRUE
chrII_196581_G_A_+	tI(AAU)B_chrII_196581_G_A_72_2	-0.0753304	-1.04512	-0.630711	0.536801	0.81207	-6.41251	UpStream	tI(AAU)B	tI(AAU)B	1	TRUE	+	1	73	1	chrII	196581	G	A	TRUE	0	1	0	-1	0	0	0	0.785	NA	FALSE	NA	NA	NA	NA	NA	NA	FALSE	FALSE	FALSE	913	NA	FALSE	0.215	0.215	FALSE
chrII_198086_T_C_-	tG(GCC)B_chrII_198086_T_C_72_2	0.211033	-0.451517	2.32111	0.0332657	0.203093	-4.13499	UpStream	tG(GCC)B	tG(GCC)B	1	TRUE	-	1	73	1	chrII	198086	T	C	TRUE	0	0	1	0	-1	0	0	0.664	NA	FALSE	NA	NA	1	NA	NA	NA	FALSE	FALSE	FALSE	387	NA	FALSE	0.336	0.664	TRUE
chrII_198526_A_G_-	tG(GCC)B_chrII_198526_A_G_72_2	0.0477783	-1.55403	0.203921	0.84089	0.949614	-6.14938	UpStream	tG(GCC)B	tG(GCC)B	1	TRUE	-	1	73	1	chrII	198526	A	G	TRUE	0	-1	0	1	0	0	0	0.681	NA	FALSE	NA	NA	1	NA	NA	NA	FALSE	FALSE	FALSE	827	2.03	TRUE	0.319	0.319	FALSE
chrII_201782_C_T_-	YBL014C_5UTR_0_211	-0.0061511	-0.160243	-0.0700265	0.944631	0.981498	-6.90706	TSS	YBL014C	YBL014C	1	TRUE	-	3	140	1	chrII	201782	C	T	TRUE	0	0	-1	0	1	0	0	0.271	4.74735	TRUE	NA	NA	16	NA	NA	NA	TRUE	FALSE	FALSE	34	2.73	TRUE	0.271	0.271	TRUE
chrII_201831_G_A_-	YBL014C_5UTR_0_121	-0.163626	-0.235954	-1.80945	0.0802772	0.303456	-5.28416	TSS	YBL014C	YBL014C	1	TRUE	-	3	91	2	chrII	201831	G	A	TRUE	0	1	0	-1	0	0	0	0.97	4.74735	TRUE	NA	NA	16	NA	NA	NA	TRUE	FALSE	FALSE	83	4.82	TRUE	0.03	0.03	FALSE
chrII_201879_C_T_-	YBL014C_5UTR_0_112	-0.204983	-0.252882	-1.81961	0.0786779	0.301119	-5.27	TSS	YBL014C	YBL014C	1	TRUE	-	3	43	3	chrII	201879	C	T	TRUE	0	0	-1	0	1	0	0	0.643	4.74735	TRUE	NA	NA	16	NA	NA	NA	TRUE	FALSE	FALSE	131	4.82	TRUE	0.357	0.643	TRUE
chrII_204182_T_C_-	YBL012C_chrII_204182_T_C_72_2	0.242312	-1.37484	2.02821	0.058868	0.273442	-4.6333	UpStream	YBL012C	YBL012C	1	TRUE	-	1	73	1	chrII	204182	T	C	TRUE	0	0	1	0	-1	0	0	0.685	NA	FALSE	NA	NA	NA	NA	NA	NA	FALSE	FALSE	FALSE	375	6.24	TRUE	0.315	0.315	FALSE
chrII_207021_GTT_GT_-	YBL010C_5UTR_0_2	-0.3267	-0.72943	-1.5009	0.143694	0.412985	-5.20177	TSS	YBL010C	YBL010C	1	TRUE	-	1	103	1	chrII	207021	GTT	GT	FALSE	-1	0	0	0	-1	0	0	0.483	5.46813	FALSE	0.159983	0.118191	10	418	215	65	FALSE	FALSE	FALSE	72	NA	FALSE	0.483	NA	NA
chrII_216520_A_G_-	YBL007C_5UTR_0_21	-0.104688	0.35941	-2.79838	0.00883214	0.0840299	-4.03123	TSS	YBL007C	YBL007C	1	TRUE	-	2	43	1	chrII	216520	A	G	TRUE	0	-1	0	1	0	0	0	0.561	6.1143	FALSE	0.107631	0.0726539	176	1573	808	391	FALSE	FALSE	FALSE	154	NA	FALSE	0.439	0.561	TRUE
chrII_216541_A_C_-	YBL007C_5UTR_0_12	0.0390925	0.430802	1.12538	0.269231	0.56942	-7.03282	TSS	YBL007C	YBL007C	1	TRUE	-	2	22	2	chrII	216541	A	C	TRUE	0	-1	1	0	0	0	0	0.994	6.1143	FALSE	0.107631	0.0726539	176	1573	808	391	FALSE	FALSE	FALSE	175	NA	FALSE	0.006	0.006	FALSE
chrII_217360_T_A_-	YBL006C_chrII_217360_T_A_72_2	-0.217334	-2.21647	-3.67533	0.00193527	0.0341846	-1.69943	UpStream	YBL006C	YBL006C	1	TRUE	-	1	73	1	chrII	217360	T	A	TRUE	0	1	0	0	-1	0	0	0.485	6.90116	FALSE	NA	NA	17	767	256	115	FALSE	FALSE	FALSE	231	2.12	TRUE	0.485	0.485	TRUE
chrII_227387_A_T_+	YBL004W_chrII_227387_A_T_72_2	-0.0199621	0.75711	-0.236139	0.816209	0.938221	-6.68875	UpStream	YBL004W	YBL004W	1	TRUE	+	1	73	1	chrII	227387	A	T	TRUE	0	-1	0	0	1	0	1	0.902	4.41871	TRUE	NA	NA	69	NA	NA	NA	FALSE	TRUE	FALSE	249	0.37	TRUE	0.098	0.098	FALSE
chrII_235838_TA_T_-	YBL003C_5UTR_0_21	0.155871	0.192264	1.23077	0.227845	0.520456	-5.83416	TSS	YBL003C	YBL003C	1	TRUE	-	2	126	1	chrII	235838	TA	T	FALSE	-1	-1	0	0	0	0	0	0.493	10.2189	FALSE	NA	NA	269	638	73	16	FALSE	TRUE	FALSE	46	NA	FALSE	0.493	0.493	TRUE
chrII_235845_A_G_-	YBL003C_5UTR_0_12	-0.0619606	0.0809279	-0.663886	0.511767	0.765086	-6.4584	TSS	YBL003C	YBL003C	1	TRUE	-	2	119	2	chrII	235845	A	G	TRUE	0	-1	0	1	0	0	0	0.493	10.2189	FALSE	NA	NA	269	638	73	16	FALSE	TRUE	FALSE	53	NA	FALSE	0.493	0.493	TRUE
chrII_236156_C_T_-	YBL003C_chrII_236156_C_T_72_2	0.00611884	2.41379	0.100654	0.921028	0.975836	-6.90286	UpStream	YBL003C	YBL003C	1	TRUE	-	1	73	1	chrII	236156	C	T	TRUE	0	0	-1	0	1	0	0	0.634	10.2189	FALSE	NA	NA	269	638	73	16	FALSE	TRUE	FALSE	364	NA	FALSE	0.366	0.634	TRUE
chrII_236256_T_A_-	YBL003C_chrII_236256_T_A_72_2	0.112158	-0.217719	1.16175	0.26174	0.595881	-6.00817	UpStream	YBL003C	YBL003C	1	TRUE	-	1	73	1	chrII	236256	T	A	TRUE	0	1	0	0	-1	0	-1	0.994	10.2189	FALSE	NA	NA	269	638	73	16	FALSE	TRUE	FALSE	464	NA	FALSE	0.006	0.006	FALSE
chrII_236313_C_T_-	YBL003C_chrII_236313_C_T_72_2	0.418141	-1.3671	1.85142	0.0819498	0.320018	-4.4264	UpStream	YBL003C	YBL003C	1	TRUE	-	1	73	1	chrII	236313	C	T	TRUE	0	0	-1	0	1	0	0	0.659	10.2189	FALSE	NA	NA	269	638	73	16	FALSE	TRUE	FALSE	521	3.86	TRUE	0.341	0.659	TRUE
chrII_236383_G_A_-	YBL003C_chrII_236383_G_A_72_2	-0.179902	-0.440247	-0.869338	0.397036	0.729281	-5.64572	UpStream	YBL003C	YBL003C	1	TRUE	-	1	73	1	chrII	236383	G	A	TRUE	0	1	0	-1	0	0	0	0.613	10.2189	FALSE	NA	NA	269	638	73	16	FALSE	TRUE	FALSE	591	3.86	TRUE	0.387	0.613	TRUE
chrII_236390_G_A_-	YBL003C_chrII_236390_G_A_72_2	-0.403582	-1.14102	-2.71727	0.0148445	0.126328	-3.13007	UpStream	YBL003C	YBL003C	1	TRUE	-	1	73	1	chrII	236390	G	A	TRUE	0	1	0	-1	0	0	0	0.659	10.2189	FALSE	NA	NA	269	638	73	16	FALSE	TRUE	FALSE	598	3.86	TRUE	0.341	0.341	FALSE
chrII_236390_G_A_+	YBL002W_chrII_236390_G_A_72_2	0.0799929	0.897716	0.301851	0.766508	0.922824	-5.79882	UpStream	YBL002W	YBL002W	1	TRUE	+	1	73	1	chrII	236390	G	A	TRUE	0	1	0	-1	0	0	0	0.659	10.2819	FALSE	NA	NA	204	609	120	51	FALSE	TRUE	FALSE	102	3.86	TRUE	0.341	0.341	FALSE
chrII_236391_G_A_-	YBL003C_chrII_236391_G_A_72_2	0.14037	-1.19035	0.721849	0.480415	0.786149	-5.78114	UpStream	YBL003C	YBL003C	1	TRUE	-	1	73	1	chrII	236391	G	A	TRUE	0	1	0	-1	0	0	0	0.553	10.2189	FALSE	NA	NA	269	638	73	16	FALSE	TRUE	FALSE	599	3.86	TRUE	0.447	0.553	TRUE
chrII_236427_TTTC_T_-	YBL003C_chrII_236427_TTTC_T_72_2	-0.147769	-0.247772	-1.87255	0.0788199	0.311082	-5.03221	UpStream	YBL003C	YBL003C	1	TRUE	-	1	75	1	chrII	236427	TTTC	T	FALSE	-3	0	-1	0	-2	0	0	0.602	10.2189	FALSE	NA	NA	269	638	73	16	FALSE	TRUE	FALSE	635	2.93	TRUE	0.398	0.602	TRUE
chrII_236441_T_A_-	YBL003C_chrII_236441_T_A_72_2	-0.24574	-0.0634422	-2.73518	0.0143022	0.124101	-3.44995	UpStream	YBL003C	YBL003C	1	TRUE	-	1	73	1	chrII	236441	T	A	TRUE	0	1	0	0	-1	0	0	0.593	10.2189	FALSE	NA	NA	269	638	73	16	FALSE	TRUE	FALSE	649	2.93	TRUE	0.407	0.593	TRUE
chrII_236489_C_A_-	YBL003C_chrII_236489_C_A_72_2	0.0865648	-0.26203	1.0355	0.31526	0.653477	-6.18539	UpStream	YBL003C	YBL003C	1	TRUE	-	1	73	1	chrII	236489	C	A	TRUE	0	1	-1	0	0	0	0	0.599	10.2189	FALSE	NA	NA	269	638	73	16	FALSE	TRUE	FALSE	697	2.93	TRUE	0.401	0.599	TRUE
chrII_237541_C_T_-	YBL001C_5UTR_0_2	0.130835	0.359221	2.3533	0.0252622	0.161848	-4.31222	TSS	YBL001C	YBL001C	1	TRUE	-	1	82	1	chrII	237541	C	T	TRUE	0	0	-1	0	1	0	0	0.668	9.2024	FALSE	NA	NA	7	720	208	66	FALSE	FALSE	FALSE	74	1.98	TRUE	0.332	0.668	TRUE
chrII_241422_T_C_-	YBR001C_chrII_241422_T_C_72_2	0.593869	-1.30344	1.21989	0.239523	0.573648	-4.93331	UpStream	YBR001C	YBR001C	1	TRUE	-	1	73	1	chrII	241422	T	C	TRUE	0	0	1	0	-1	0	0	0.936	4.42335	FALSE	NA	NA	11	450	76	31	FALSE	TRUE	TRUE	139	2.14	TRUE	0.064	0.064	FALSE
chrII_241482_C_T_-	YBR001C_chrII_241482_C_T_72_2	-0.372692	-1.1819	-2.23149	0.0397203	0.222756	-4.11922	UpStream	YBR001C	YBR001C	1	TRUE	-	1	73	1	chrII	241482	C	T	TRUE	0	0	-1	0	1	0	0	0.945	4.42335	FALSE	NA	NA	11	450	76	31	FALSE	TRUE	TRUE	199	NA	FALSE	0.055	0.055	FALSE
chrII_242639_AT_A_-	YBR002C_5UTR_0_2	-0.0221059	0.205898	-0.365586	0.717205	0.885564	-6.9856	TSS	YBR002C	YBR002C	1	TRUE	-	1	99	1	chrII	242639	AT	A	FALSE	-1	0	0	0	-1	0	0	0.45	6.35358	TRUE	0.0469713	0.0334723	13	1168	769	366	FALSE	TRUE	FALSE	71	5.8	TRUE	0.45	NA	NA
chrII_245747_T_C_-	YBR004C_5UTR_0_21	0.213357	-0.102106	1.24591	0.222313	0.513095	-5.535	TSS	YBR004C	YBR004C	1	TRUE	-	2	81	1	chrII	245747	T	C	TRUE	0	0	1	0	-1	0	0	0.782	4.88621	TRUE	0.0996237	0.070978	4	1078	295	113	FALSE	FALSE	FALSE	80	NA	FALSE	0.218	0.218	FALSE
chrII_245763_G_GAAA_-	YBR004C_chrII_245763_G_GAAA_72_2	-0.246056	0.42678	-1.12207	0.277773	0.611356	-5.63639	UpStream	YBR004C	YBR004C	1	TRUE	-	1	73	1	chrII	245763	G	GAAA	FALSE	3	3	0	0	0	0	0	0.613	4.88621	TRUE	0.0996237	0.070978	4	1078	295	113	FALSE	FALSE	FALSE	96	NA	FALSE	0.387	NA	NA
chrII_245877_G_A_-	YBR004C_chrII_245877_G_A_72_2	0.0153598	-0.680003	0.123175	0.903445	0.968745	-6.61317	UpStream	YBR004C	YBR004C	1	TRUE	-	1	73	1	chrII	245877	G	A	TRUE	0	1	0	-1	0	0	0	0.846	4.88621	TRUE	0.0996237	0.070978	4	1078	295	113	FALSE	FALSE	FALSE	210	1.56	TRUE	0.154	0.154	FALSE
chrII_246575_T_C_+	YBR006W_chrII_246575_T_C_72_2	-0.0958138	-1.00308	-0.930226	0.365561	0.697657	-6.19749	UpStream	YBR006W	YBR006W	1	TRUE	+	1	73	1	chrII	246575	T	C	TRUE	0	0	1	0	-1	0	0	0.711	5.77738	FALSE	NA	NA	6	818	150	38	FALSE	TRUE	FALSE	435	0.7	TRUE	0.289	0.289	FALSE
chrII_246816_G_A_+	YBR006W_5UTR_0_2	0.0247777	-1.02549	0.469039	0.642388	0.850976	-7.31648	TSS	YBR006W	YBR006W	1	TRUE	+	1	77	1	chrII	246816	G	A	TRUE	0	1	0	-1	0	0	-1	0.61	5.77738	FALSE	NA	NA	6	818	150	38	FALSE	TRUE	FALSE	194	NA	FALSE	0.39	0.61	TRUE
chrII_251105_T_G_-	YBR007C_chrII_251105_T_G_72_2	0.0904013	0.257791	1.00181	0.330791	0.668279	-6.09402	UpStream	YBR007C	YBR007C	1	TRUE	-	1	73	1	chrII	251105	T	G	TRUE	0	0	0	1	-1	0	-1	0.465	5.15544	FALSE	NA	NA	4	703	113	34	FALSE	FALSE	FALSE	89	NA	FALSE	0.465	0.465	TRUE
chrII_251134_G_T_-	YBR007C_chrII_251134_G_T_72_2	-0.173176	-0.0839521	-2.28265	0.0359059	0.211541	-4.4105	UpStream	YBR007C	YBR007C	1	TRUE	-	1	73	1	chrII	251134	G	T	TRUE	0	0	0	-1	1	0	0	0.862	5.15544	FALSE	NA	NA	4	703	113	34	FALSE	FALSE	FALSE	118	4.27	TRUE	0.138	0.138	FALSE
chrII_251548_G_A_-	YBR007C_chrII_251548_G_A_72_2	-0.0124696	-0.997844	-0.141786	0.888953	0.963235	-6.62502	UpStream	YBR007C	YBR007C	1	TRUE	-	1	73	1	chrII	251548	G	A	TRUE	0	1	0	-1	0	0	0	0.706	5.15544	FALSE	NA	NA	4	703	113	34	FALSE	FALSE	FALSE	532	3.05	TRUE	0.294	0.706	TRUE
chrII_251790_C_T_-	YBR007C_chrII_251790_C_T_72_2	0.092284	-1.01789	0.704188	0.491059	0.791015	-6.34135	UpStream	YBR007C	YBR007C	1	TRUE	-	1	73	1	chrII	251790	C	T	TRUE	0	0	-1	0	1	0	0	0.702	5.15544	FALSE	NA	NA	4	703	113	34	FALSE	FALSE	FALSE	774	0.88	TRUE	0.298	0.298	FALSE
chrII_251800_C_T_-	YBR007C_chrII_251800_C_T_72_2	-0.162298	-1.00981	-0.978259	0.341963	0.679214	-6.02876	UpStream	YBR007C	YBR007C	1	TRUE	-	1	73	1	chrII	251800	C	T	TRUE	0	0	-1	0	1	0	0	0.697	5.15544	FALSE	NA	NA	4	703	113	34	FALSE	FALSE	FALSE	784	0.88	TRUE	0.303	0.697	TRUE
chrII_251820_G_C_-	YBR007C_chrII_251820_G_C_72_2	-0.233708	-1.04825	-1.65149	0.117393	0.395945	-5.36512	UpStream	YBR007C	YBR007C	1	TRUE	-	1	73	1	chrII	251820	G	C	TRUE	0	0	1	-1	0	0	0	0.816	5.15544	FALSE	NA	NA	4	703	113	34	FALSE	FALSE	FALSE	804	0.88	TRUE	0.184	0.184	FALSE
chrII_251882_A_G_-	YBR007C_chrII_251882_A_G_72_2	0.0421145	-1.05638	0.474687	0.641183	0.870819	-6.60561	UpStream	YBR007C	YBR007C	1	TRUE	-	1	73	1	chrII	251882	A	G	TRUE	0	-1	0	1	0	0	-1	0.62	5.15544	FALSE	NA	NA	4	703	113	34	FALSE	FALSE	FALSE	866	0.88	TRUE	0.38	0.62	TRUE
chrII_252013_G_A_-	YBR007C_chrII_252013_G_A_72_2	0.00273399	-0.793469	0.0251517	0.980233	0.992897	-6.78454	UpStream	YBR007C	YBR007C	1	TRUE	-	1	73	1	chrII	252013	G	A	TRUE	0	1	0	-1	0	0	0	0.69	5.15544	FALSE	NA	NA	4	703	113	34	FALSE	FALSE	FALSE	997	0.66	TRUE	0.31	0.31	FALSE
chrII_254436_T_C_-	YBR008C_5UTR_0_2	-0.125743	-0.111799	-2.3837	0.0235772	0.155558	-4.35964	TSS	YBR008C	YBR008C	1	TRUE	-	1	136	1	chrII	254436	T	C	TRUE	0	0	1	0	-1	0	0	0.995	4.62081	FALSE	NA	NA	1	354	77	17	FALSE	FALSE	FALSE	227	NA	FALSE	0.005	0.005	FALSE
chrII_255828_T_C_+	YBR010W_chrII_255828_T_C_72_2	-0.142914	0.0637557	-1.75922	0.0969229	0.351296	-5.30061	UpStream	YBR010W	YBR010W	1	TRUE	+	1	73	1	chrII	255828	T	C	TRUE	0	0	1	0	-1	0	0	0.656	10.3697	FALSE	NA	NA	593	907	268	119	FALSE	TRUE	FALSE	503	NA	FALSE	0.344	0.344	FALSE
chrII_256267_C_A_-	YBR009C_chrII_256267_C_A_72_2	0.0385469	-1.60063	0.149282	0.883127	0.960423	-5.98404	UpStream	YBR009C	YBR009C	1	TRUE	-	1	73	1	chrII	256267	C	A	TRUE	0	1	-1	0	0	-1	1	0.656	11.0306	FALSE	NA	NA	466	771	345	174	FALSE	TRUE	FALSE	583	NA	FALSE	0.344	0.656	TRUE
chrII_256267_C_A_+	YBR010W_5UTR_0_2	0.0766468	2.57841	0.280894	0.780695	0.913834	-5.47822	TSS	YBR010W	YBR010W	1	TRUE	+	1	109	1	chrII	256267	C	A	TRUE	0	1	-1	0	0	0	0	0.656	10.3697	FALSE	NA	NA	593	907	268	119	FALSE	TRUE	FALSE	64	NA	FALSE	0.344	0.656	TRUE
chrII_258208_A_C_-	YBR011C_chrII_258208_A_C_72_2	-0.133612	1.53329	-0.826956	0.419969	0.743145	-5.73763	UpStream	YBR011C	YBR011C	1	TRUE	-	1	73	1	chrII	258208	A	C	TRUE	0	-1	1	0	0	0	0	0.701	10.7514	TRUE	NA	NA	52	1679	746	324	FALSE	TRUE	FALSE	233	NA	FALSE	0.299	0.299	FALSE
chrII_258211_A_G_-	YBR011C_chrII_258211_A_G_72_2	-0.097918	1.30445	-0.860172	0.401924	0.733672	-5.99991	UpStream	YBR011C	YBR011C	1	TRUE	-	1	73	1	chrII	258211	A	G	TRUE	0	-1	0	1	0	0	0	0.701	10.7514	TRUE	NA	NA	52	1679	746	324	FALSE	TRUE	FALSE	236	NA	FALSE	0.299	0.299	FALSE
chrII_258961_A_G_-	YBR011C_chrII_258961_A_G_72_2	-0.400822	-1.55789	-1.15302	0.265205	0.600553	-5.33624	UpStream	YBR011C	YBR011C	1	TRUE	-	1	73	1	chrII	258961	A	G	TRUE	0	-1	0	1	0	0	0	0.778	10.7514	TRUE	NA	NA	52	1679	746	324	FALSE	TRUE	FALSE	986	9.71	TRUE	0.222	0.222	FALSE
chrII_259764_C_T_-	YBR012C_chrII_259764_C_T_72_2	0.0736817	-1.50016	0.323503	0.750347	0.918964	-6.16319	UpStream	YBR012C	YBR012C	1	TRUE	-	1	73	1	chrII	259764	C	T	TRUE	0	0	-1	0	1	0	0	NA	4.07786	FALSE	NA	NA	NA	368	59	9	FALSE	FALSE	FALSE	198	2.69	TRUE	NA	NA	NA
chrII_266107_G_A_-	YBR013C_chrII_266107_G_A_72_2	-0.078121	-0.470174	-0.713465	0.485451	0.790033	-6.50532	UpStream	YBR013C	YBR013C	1	TRUE	-	1	73	1	chrII	266107	G	A	TRUE	0	1	0	-1	0	0	0	0.614	4.60796	FALSE	NA	NA	1	317	51	15	FALSE	FALSE	FALSE	226	NA	FALSE	0.386	NA	NA
chrII_266107_G_A_+	tT(AGU)B_chrII_266107_G_A_72_2	-0.351737	-0.487528	-3.01423	0.00796101	0.0876299	-2.86663	UpStream	tT(AGU)B	tT(AGU)B	1	TRUE	+	1	73	1	chrII	266107	G	A	TRUE	0	1	0	-1	0	0	0	0.614	NA	FALSE	NA	NA	1	NA	NA	NA	FALSE	FALSE	FALSE	271	NA	FALSE	0.386	NA	NA
chrII_266250_A_T_-	YBR013C_chrII_266250_A_T_72_2	0.61818	-1.86063	3.10426	0.00657692	0.0773653	-2.56112	UpStream	YBR013C	YBR013C	1	TRUE	-	1	73	1	chrII	266250	A	T	TRUE	0	-1	0	0	1	-1	0	0.733	4.60796	FALSE	NA	NA	1	317	51	15	FALSE	FALSE	FALSE	369	5.52	TRUE	0.267	NA	NA
chrII_266324_T_C_-	YBR013C_chrII_266324_T_C_72_2	0.19256	-1.27304	1.0749	0.297768	0.633075	-5.71573	UpStream	YBR013C	YBR013C	1	TRUE	-	1	73	1	chrII	266324	T	C	TRUE	0	0	1	0	-1	0	0	0.727	4.60796	FALSE	NA	NA	1	317	51	15	FALSE	FALSE	FALSE	443	5.52	TRUE	0.273	NA	NA
chrII_266339_T_G_-	YBR013C_chrII_266339_T_G_72_2	0.401465	-0.944127	2.98969	0.00838539	0.0904838	-2.93669	UpStream	YBR013C	YBR013C	1	TRUE	-	1	73	1	chrII	266339	T	G	TRUE	0	0	0	1	-1	0	0	0.65	4.60796	FALSE	NA	NA	1	317	51	15	FALSE	FALSE	FALSE	458	5.52	TRUE	0.35	0.65	TRUE
chrII_266358_C_T_-	YBR013C_chrII_266358_C_T_72_2	-0.195614	-1.39121	-1.47692	0.158382	0.462016	-5.35112	UpStream	YBR013C	YBR013C	1	TRUE	-	1	73	1	chrII	266358	C	T	TRUE	0	0	-1	0	1	0	0	0.989	4.60796	FALSE	NA	NA	1	317	51	15	FALSE	FALSE	FALSE	477	5.52	TRUE	0.011	0.989	TRUE
chrII_267481_A_AT_-	YBR014C_5UTR_0_211	0.0942162	-1.11803	0.67766	0.503112	0.759558	-6.69284	TSS	YBR014C	YBR014C	1	TRUE	-	3	96	1	chrII	267481	A	AT	FALSE	1	0	0	0	1	0	0	0.543	7.06448	FALSE	NA	NA	6	659	116	38	FALSE	FALSE	TRUE	145	2.59	TRUE	0.457	NA	NA
chrII_267510_C_T_-	YBR014C_5UTR_0_121	0.186289	-1.07643	1.51891	0.139115	0.405584	-5.82678	TSS	YBR014C	YBR014C	1	TRUE	-	3	67	2	chrII	267510	C	T	TRUE	0	0	-1	0	1	0	0	0.893	7.06448	FALSE	NA	NA	6	659	116	38	FALSE	FALSE	TRUE	174	2.59	TRUE	0.107	0.107	FALSE
chrII_267525_T_A_-	YBR014C_chrII_267525_T_A_72_2	-0.256164	-1.11825	-2.22275	0.0404088	0.225171	-4.37638	UpStream	YBR014C	YBR014C	1	TRUE	-	1	73	1	chrII	267525	T	A	TRUE	0	1	0	0	-1	0	0	0.765	7.06448	FALSE	NA	NA	6	659	116	38	FALSE	FALSE	TRUE	189	2.59	TRUE	0.235	0.235	FALSE
chrII_267594_A_G_-	YBR014C_chrII_267594_A_G_72_2	-0.0769173	-1.48344	-0.564807	0.579744	0.838015	-6.34904	UpStream	YBR014C	YBR014C	1	TRUE	-	1	73	1	chrII	267594	A	G	TRUE	0	-1	0	1	0	0	0	0.65	7.06448	FALSE	NA	NA	6	659	116	38	FALSE	FALSE	TRUE	258	4.35	TRUE	0.35	0.65	TRUE
chrII_269653_C_T_-	YBR015C_chrII_269653_C_T_72_2	-0.435564	-0.65383	-3.19445	0.00542759	0.0697008	-2.4516	UpStream	YBR015C	YBR015C	1	TRUE	-	1	73	1	chrII	269653	C	T	TRUE	0	0	-1	0	1	0	0	0.946	6.8811	FALSE	0.13308	0.0898658	9	1018	366	159	FALSE	FALSE	FALSE	150	NA	FALSE	0.054	0.054	FALSE
chrII_278379_CT_C_-	YBR019C_5UTR_0_2	-1.05731	-0.645236	-15.4401	6.19123e-16	3.13173e-13	26.3292	TSS	YBR019C	YBR019C	1	TRUE	-	1	143	1	chrII	278379	CT	C	FALSE	-1	0	0	0	-1	0	0	0.003049	NA	FALSE	0.0811161	0.0555935	15	857	224	61	FALSE	TRUE	FALSE	27	3.51	TRUE	0.003049	0.003049	TRUE
chrII_283573_C_T_+	YBR022W_5UTR_0_2	0.00095626	-0.382473	0.0196632	0.984441	0.994915	-7.36138	TSS	YBR022W	YBR022W	1	TRUE	+	1	42	1	chrII	283573	C	T	TRUE	0	0	-1	0	1	0	0	0.577	5.59251	FALSE	0.172763	0.121876	3	767	78	19	FALSE	FALSE	FALSE	165	6.09	TRUE	0.423	0.423	FALSE
chrII_292118_GAA_GA_-	YBR025C_chrII_292118_GAA_GA_72_2	0.00353113	2.30415	0.0368486	0.971044	0.989872	-6.49974	UpStream	YBR025C	YBR025C	1	TRUE	-	1	74	1	chrII	292118	GAA	GA	FALSE	-1	-1	0	0	0	0	0	0.488	8.88303	FALSE	0.0763378	0.0298797	42	1063	286	91	FALSE	TRUE	FALSE	253	3.28	TRUE	0.488	0.512	FALSE
chrII_292835_C_T_-	YBR025C_chrII_292835_C_T_72_2	0.152698	-2.0716	1.61355	0.125437	0.409779	-5.47748	UpStream	YBR025C	YBR025C	1	TRUE	-	1	73	1	chrII	292835	C	T	TRUE	0	0	-1	0	1	0	0	0.97	8.88303	FALSE	0.0763378	0.0298797	42	1063	286	91	FALSE	TRUE	FALSE	970	0.42	TRUE	0.03	0.03	FALSE
chrII_298141_C_T_+	YBR030W_5UTR_0_2	0.0465137	-0.832104	1.00474	0.322951	0.618748	-6.88043	TSS	YBR030W	YBR030W	1	TRUE	+	1	51	1	chrII	298141	C	T	TRUE	0	0	-1	0	1	0	0	0.957	5.90904	FALSE	NA	NA	4	899	171	74	FALSE	FALSE	FALSE	151	1.36	TRUE	0.043	0.043	FALSE
chrII_315453_C_T_+	YBR039W_5UTR_0_2	0.0433237	-0.063244	1.20664	0.236876	0.529927	-6.97475	TSS	YBR039W	YBR039W	1	TRUE	+	1	110	1	chrII	315453	C	T	TRUE	0	0	-1	0	1	0	0	0.398	8.87221	FALSE	0.0457612	0.0220467	47	600	97	47	FALSE	TRUE	FALSE	122	NA	FALSE	0.398	0.398	TRUE
chrII_324106_A_C_-	YBR043C_5UTR_0_21	0.148203	-0.18653	3.16063	0.00355094	0.0454731	-2.67855	TSS	YBR043C	YBR043C	1	TRUE	-	2	133	1	chrII	324106	A	C	TRUE	0	-1	1	0	0	0	0	0.731	5.39291	FALSE	0.0914179	0.0655333	8	670	117	35	FALSE	FALSE	FALSE	161	8.96	TRUE	0.269	0.731	TRUE
chrII_324220_G_A_-	YBR043C_5UTR_0_12	-0.10799	-0.312347	-1.93678	0.0621132	0.266294	-5.24881	TSS	YBR043C	YBR043C	1	TRUE	-	2	19	2	chrII	324220	G	A	TRUE	0	1	0	-1	0	0	0	0.719	5.39291	FALSE	0.0914179	0.0655333	8	670	117	35	FALSE	FALSE	FALSE	275	NA	FALSE	0.281	0.719	TRUE
chrII_326112_A_T_-	YBR044C_5UTR_0_21	0.0453331	0.125655	0.415908	0.680398	0.870482	-6.5075	TSS	YBR044C	YBR044C	1	TRUE	-	2	125	1	chrII	326112	A	T	TRUE	0	-1	0	0	1	0	0	0.618	5.06724	FALSE	NA	NA	16	1245	273	60	FALSE	FALSE	FALSE	53	2.13	TRUE	0.382	0.382	FALSE
chrII_326179_A_G_-	YBR044C_5UTR_0_12	-0.0967577	0.0387771	-1.35894	0.184162	0.466944	-5.69847	TSS	YBR044C	YBR044C	1	TRUE	-	2	58	2	chrII	326179	A	G	TRUE	0	-1	0	1	0	0	0	0.915	5.06724	FALSE	NA	NA	16	1245	273	60	FALSE	FALSE	FALSE	120	3.8	TRUE	0.085	0.085	FALSE
chrII_327156_T_A_-	tV(UAC)B_chrII_327156_T_A_72_2	0.0899423	-1.03996	0.707318	0.489163	0.790336	-6.42649	UpStream	tV(UAC)B	tV(UAC)B	1	TRUE	-	1	73	1	chrII	327156	T	A	TRUE	0	1	0	0	-1	0	0	0.594	NA	FALSE	NA	NA	1	NA	NA	NA	FALSE	FALSE	FALSE	291	2.89	TRUE	0.406	0.594	TRUE
chrII_330203_T_A_-	YBR045C_chrII_330203_T_A_72_2	-0.276728	-0.277254	-2.78593	0.0128674	0.115703	-3.27192	UpStream	YBR045C	YBR045C	1	TRUE	-	1	73	1	chrII	330203	T	A	TRUE	0	1	0	0	-1	0	0	0.819	2.60908	FALSE	NA	NA	6	359	39	10	FALSE	FALSE	FALSE	111	0.94	TRUE	0.181	0.181	FALSE
chrII_330495_C_A_-	YBR045C_chrII_330495_C_A_72_2	-0.083198	-1.04359	-0.547027	0.591626	0.842567	-6.35685	UpStream	YBR045C	YBR045C	1	TRUE	-	1	73	1	chrII	330495	C	A	TRUE	0	1	-1	0	0	0	0	0.549	2.60908	FALSE	NA	NA	6	359	39	10	FALSE	FALSE	FALSE	403	4.17	TRUE	0.451	0.549	TRUE
chrII_331557_G_A_-	YBR046C_5UTR_0_2	-0.310005	-1.53866	-1.68515	0.102198	0.349293	-5.26142	TSS	YBR046C	YBR046C	1	TRUE	-	1	130	1	chrII	331557	G	A	TRUE	0	1	0	-1	0	0	0	0.572	4.96179	FALSE	NA	NA	9	803	143	38	FALSE	TRUE	FALSE	46	2.3	TRUE	0.428	0.572	TRUE
chrII_331783_G_A_+	YBR047W_5UTR_0_21	-0.0492448	-1.13867	-0.499175	0.621248	0.841112	-6.88732	TSS	YBR047W	YBR047W	1	TRUE	+	2	115	1	chrII	331783	G	A	TRUE	0	1	0	-1	0	0	0	0.783	4.21799	FALSE	0.102413	0.0784074	3	1005	249	83	FALSE	FALSE	FALSE	50	1.87	TRUE	0.217	0.783	TRUE
chrII_331783_G_A_-	YBR046C_chrII_331783_G_A_72_2	0.11112	-0.829745	0.713295	0.485553	0.790033	-6.12373	UpStream	YBR046C	YBR046C	1	TRUE	-	1	73	1	chrII	331783	G	A	TRUE	0	1	0	-1	0	0	0	0.783	4.96179	FALSE	NA	NA	9	803	143	38	FALSE	TRUE	FALSE	272	1.87	TRUE	0.217	0.783	TRUE
chrII_331804_A_G_+	YBR047W_5UTR_0_12	-0.0807212	-1.15391	-0.85725	0.398013	0.688767	-6.62229	TSS	YBR047W	YBR047W	1	TRUE	+	2	136	2	chrII	331804	A	G	TRUE	0	-1	0	1	0	0	0	0.988	4.21799	FALSE	0.102413	0.0784074	3	1005	249	83	FALSE	FALSE	FALSE	29	1.87	TRUE	0.012	0.012	FALSE
chrII_332691_G_GCTTTACGTTTCC_+	YBR048W_chrII_332691_G_GCTTTACGTTTCC_72_2	-0.0985151	-0.775088	-0.932092	0.364624	0.696965	-6.34584	UpStream	YBR048W	YBR048W	1	TRUE	+	1	69	1	chrII	332691	G	GCTTTACGTTTCC	FALSE	12	1	4	1	6	0	0	0.072	10.6945	FALSE	NA	NA	33	1279	478	177	FALSE	TRUE	TRUE	140	NA	FALSE	0.072	0.072	TRUE
chrII_332772_A_G_+	YBR048W_5UTR_0_12	0.265183	-0.0534245	1.29567	0.204838	0.493205	-5.29775	TSS	YBR048W	YBR048W	1	TRUE	+	2	99	2	chrII	332772	A	G	TRUE	0	-1	0	1	0	0	0	0.555	10.6945	FALSE	NA	NA	33	1279	478	177	FALSE	TRUE	TRUE	59	2.04	TRUE	0.445	0.555	TRUE
chrII_337074_G_A_-	YBR049C_5UTR_0_21	-0.0492701	-0.0607533	-0.437193	0.665061	0.863697	-6.42204	TSS	YBR049C	YBR049C	1	TRUE	-	2	38	1	chrII	337074	G	A	TRUE	0	1	0	-1	0	0	0	0.789	5.79862	TRUE	NA	NA	41	1006	866	598	FALSE	FALSE	TRUE	256	4.56	TRUE	0.211	0.789	TRUE
chrII_337074_G_A_+	YBR051W_chrII_337074_G_A_72_2	0.150304	0.0713265	1.48897	0.155213	0.455188	-5.31186	UpStream	YBR051W	YBR051W	1	TRUE	+	1	73	1	chrII	337074	G	A	TRUE	0	1	0	-1	0	0	0	0.789	NA	FALSE	NA	NA	NA	626	78	15	FALSE	FALSE	FALSE	914	4.56	TRUE	0.211	0.789	TRUE
chrII_337088_A_C_-	YBR049C_5UTR_0_12	-0.0500936	-0.0544147	-0.426178	0.67298	0.867114	-6.49075	TSS	YBR049C	YBR049C	1	TRUE	-	2	24	2	chrII	337088	A	C	TRUE	0	-1	1	0	0	0	0	0.708	5.79862	TRUE	NA	NA	41	1006	866	598	FALSE	FALSE	TRUE	270	4.56	TRUE	0.292	0.708	TRUE
chrII_337611_T_C_+	YBR051W_chrII_337611_T_C_72_2	0.308362	-0.561408	2.2736	0.0365545	0.213233	-4.30866	UpStream	YBR051W	YBR051W	1	TRUE	+	1	73	1	chrII	337611	T	C	TRUE	0	0	1	0	-1	0	0	0.758	NA	FALSE	NA	NA	NA	626	78	15	FALSE	FALSE	FALSE	377	NA	FALSE	0.242	0.242	FALSE
chrII_337897_G_A_+	YBR051W_chrII_337897_G_A_72_2	0.0133937	-0.742617	0.0776388	0.939042	0.981038	-6.5246	UpStream	YBR051W	YBR051W	1	TRUE	+	1	73	1	chrII	337897	G	A	TRUE	0	1	0	-1	0	0	0	0.723	NA	FALSE	NA	NA	NA	626	78	15	FALSE	FALSE	FALSE	91	1.23	TRUE	0.277	0.277	FALSE
chrII_339511_G_A_-	YBR052C_5UTR_0_21	0.180019	0.0706745	1.42125	0.16542	0.446928	-5.56537	TSS	YBR052C	YBR052C	1	TRUE	-	2	50	1	chrII	339511	G	A	TRUE	0	1	0	-1	0	0	0	0.979	8.22239	FALSE	0.106747	0.0766097	31	544	60	15	FALSE	FALSE	TRUE	159	4.07	TRUE	0.021	0.021	FALSE
chrII_339542_G_A_-	YBR052C_5UTR_0_12	0.103396	0.0386431	0.812319	0.422923	0.704581	-6.2455	TSS	YBR052C	YBR052C	1	TRUE	-	2	19	2	chrII	339542	G	A	TRUE	0	1	0	-1	0	0	0	0.659	8.22239	FALSE	0.106747	0.0766097	31	544	60	15	FALSE	FALSE	TRUE	190	4.07	TRUE	0.341	0.659	TRUE
chrII_341186_T_C_-	YBR053C_chrII_341186_T_C_72_2	0.0637854	-0.702959	0.624227	0.540948	0.815326	-6.70906	UpStream	YBR053C	YBR053C	1	TRUE	-	1	73	1	chrII	341186	T	C	TRUE	0	0	1	0	-1	0	0	0.993	6.66371	FALSE	0.0944884	0.0697246	6	750	122	38	FALSE	FALSE	FALSE	435	3.51	TRUE	0.007	0.007	FALSE
chrII_342642_G_A_+	YBR054W_5UTR_0_21	-0.237713	0.413679	-3.61106	0.00108331	0.0190799	-1.38504	TSS	YBR054W	YBR054W	1	TRUE	+	2	6	1	chrII	342642	G	A	TRUE	0	1	0	-1	0	0	0	0.297	7.64474	FALSE	0.0491563	0.0242068	21	743	55	17	FALSE	FALSE	TRUE	459	0.85	TRUE	0.297	0.297	TRUE
chrII_342723_C_T_+	YBR054W_5UTR_0_12	0.00791279	0.535803	0.109711	0.91336	0.967555	-6.94754	TSS	YBR054W	YBR054W	1	TRUE	+	2	87	2	chrII	342723	C	T	TRUE	0	0	-1	0	1	0	0	0.991	7.64474	FALSE	0.0491563	0.0242068	21	743	55	17	FALSE	FALSE	TRUE	378	0.85	TRUE	0.009	0.009	FALSE
chrII_347317_C_T_-	YBR055C_5UTR_0_2	-0.113544	-0.236842	-0.559231	0.5801	0.813336	-6.02141	TSS	YBR055C	YBR055C	1	TRUE	-	1	136	1	chrII	347317	C	T	TRUE	0	0	-1	0	1	0	0	0.638	4.97855	TRUE	NA	NA	81	1733	533	280	FALSE	TRUE	FALSE	16	1.96	TRUE	0.362	0.638	TRUE
chrII_347777_A_G_+	YBR056W_5UTR_0_211	0.116034	-0.236264	1.54906	0.131715	0.395014	-5.79175	TSS	YBR056W	YBR056W	1	TRUE	+	3	55	1	chrII	347777	A	G	TRUE	0	-1	0	1	0	0	0	0.706	6.70461	FALSE	0.0871867	0.0617756	16	766	209	88	FALSE	FALSE	FALSE	102	6.43	TRUE	0.294	0.706	TRUE
chrII_347803_T_A_+	YBR056W_5UTR_0_121	0.0822637	-0.259634	1.01252	0.31928	0.614242	-6.38816	TSS	YBR056W	YBR056W	1	TRUE	+	3	81	2	chrII	347803	T	A	TRUE	0	1	0	0	-1	0	0	0.786	6.70461	FALSE	0.0871867	0.0617756	16	766	209	88	FALSE	FALSE	FALSE	76	6.43	TRUE	0.214	0.214	FALSE
chrII_347856_T_G_+	YBR056W_5UTR_0_112	0.0811643	-0.254511	1.15629	0.256565	0.556993	-6.36998	TSS	YBR056W	YBR056W	1	TRUE	+	3	134	3	chrII	347856	T	G	TRUE	0	0	0	1	-1	0	0	0.815	6.70461	FALSE	0.0871867	0.0617756	16	766	209	88	FALSE	FALSE	FALSE	23	6.43	TRUE	0.185	0.185	FALSE
chrII_360477_A_C_-	YBR059C_5UTR_0_2	0.168666	-0.328183	1.98351	0.0564039	0.251626	-5.20699	TSS	YBR059C	YBR059C	1	TRUE	-	1	5	1	chrII	360477	A	C	TRUE	0	-1	1	0	0	0	0	0.455	5.32136	FALSE	NA	NA	106	575	123	44	FALSE	TRUE	FALSE	290	3.62	TRUE	0.455	0.455	TRUE
chrII_362638_C_T_-	YBR060C_5UTR_0_2111	0.135599	0.175213	2.50636	0.0177691	0.130896	-4.09613	TSS	YBR060C	YBR060C	1	TRUE	-	4	113	1	chrII	362638	C	T	TRUE	0	0	-1	0	1	0	0	0.672	5.29712	TRUE	0.120656	0.0913427	43	2465	969	394	FALSE	TRUE	FALSE	124	1.74	TRUE	0.328	0.672	TRUE
chrII_362688_T_G_-	YBR060C_5UTR_0_1211	0.114011	0.16453	2.22217	0.0338528	0.188174	-4.71392	TSS	YBR060C	YBR060C	1	TRUE	-	4	63	2	chrII	362688	T	G	TRUE	0	0	0	1	-1	0	0	0.47	5.29712	TRUE	0.120656	0.0913427	43	2465	969	394	FALSE	TRUE	FALSE	174	1.6	TRUE	0.47	0.47	TRUE
chrII_362702_C_T_-	YBR060C_5UTR_0_1121	-0.112857	0.0526806	-1.97563	0.057333	0.253653	-5.17425	TSS	YBR060C	YBR060C	1	TRUE	-	4	49	3	chrII	362702	C	T	TRUE	0	0	-1	0	1	0	1	0.703	5.29712	TRUE	0.120656	0.0913427	43	2465	969	394	FALSE	TRUE	FALSE	188	1.6	TRUE	0.297	0.703	TRUE
chrII_362748_T_C_-	YBR060C_5UTR_0_1112	-0.118936	0.0466407	-2.13394	0.0410256	0.215793	-4.81693	TSS	YBR060C	YBR060C	1	TRUE	-	4	3	4	chrII	362748	T	C	TRUE	0	0	1	0	-1	0	0	0.663	5.29712	TRUE	0.120656	0.0913427	43	2465	969	394	FALSE	TRUE	FALSE	234	1.6	TRUE	0.337	0.663	TRUE
chrII_362997_A_G_-	YBR060C_chrII_362997_A_G_72_2	-0.0349517	-0.732828	-0.316778	0.755354	0.92091	-6.62258	UpStream	YBR060C	YBR060C	1	TRUE	-	1	73	1	chrII	362997	A	G	TRUE	0	-1	0	1	0	0	0	0.668	5.29712	TRUE	0.120656	0.0913427	43	2465	969	394	FALSE	TRUE	FALSE	483	3.47	TRUE	0.332	0.668	TRUE
chrII_363144_T_C_-	YBR060C_chrII_363144_T_C_72_2	-0.128504	-0.977623	-1.29498	0.213016	0.539079	-5.74055	UpStream	YBR060C	YBR060C	1	TRUE	-	1	73	1	chrII	363144	T	C	TRUE	0	0	1	0	-1	0	0	0.672	5.29712	TRUE	0.120656	0.0913427	43	2465	969	394	FALSE	TRUE	FALSE	630	NA	FALSE	0.328	0.328	FALSE
chrII_363277_C_G_-	YBR060C_chrII_363277_C_G_72_2	-0.0117254	-0.935339	-0.131263	0.897142	0.966409	-6.73205	UpStream	YBR060C	YBR060C	1	TRUE	-	1	73	1	chrII	363277	C	G	TRUE	0	0	-1	1	0	0	0	0.711	5.29712	TRUE	0.120656	0.0913427	43	2465	969	394	FALSE	TRUE	FALSE	763	0.32	TRUE	0.289	0.289	FALSE
chrII_363508_GA_G_-	YBR060C_chrII_363508_GA_G_72_2	0.121818	-0.955318	1.1576	0.263383	0.5981	-6.07076	UpStream	YBR060C	YBR060C	1	TRUE	-	1	74	1	chrII	363508	GA	G	FALSE	-1	-1	0	0	0	0	0	0.666	5.29712	TRUE	0.120656	0.0913427	43	2465	969	394	FALSE	TRUE	FALSE	994	2.2	TRUE	0.334	NA	NA
chrII_365830_G_A_-	YBR061C_5UTR_0_21	0.168248	0.32247	2.83719	0.00802822	0.0793893	-3.55644	TSS	YBR061C	YBR061C	1	TRUE	-	2	41	1	chrII	365830	G	A	TRUE	0	1	0	-1	0	0	0	0.993	6.33991	FALSE	0.0549201	0.0385981	6	426	52	14	FALSE	TRUE	FALSE	111	4.59	TRUE	0.007	0.007	FALSE
chrII_365863_C_T_-	YBR061C_5UTR_0_12	0.0436787	0.260498	0.732639	0.469389	0.739534	-6.91217	TSS	YBR061C	YBR061C	1	TRUE	-	2	8	2	chrII	365863	C	T	TRUE	0	0	-1	0	1	0	0	0.213	6.33991	FALSE	0.0549201	0.0385981	6	426	52	14	FALSE	TRUE	FALSE	144	4.59	TRUE	0.213	NA	NA
chrII_366946_G_C_+	YBR064W_chrII_366946_G_C_72_2	-0.0298869	-0.646093	-0.37927	0.709286	0.906434	-6.69597	UpStream	YBR064W	YBR064W	1	TRUE	+	1	73	1	chrII	366946	G	C	TRUE	0	0	1	-1	0	0	0	0.541	NA	FALSE	NA	NA	NA	497	84	50	FALSE	FALSE	FALSE	817	4.03	TRUE	0.459	0.541	TRUE
chrII_367503_T_C_+	YBR064W_chrII_367503_T_C_72_2	0.00761522	-0.82767	0.0638293	0.949867	0.982401	-6.48417	UpStream	YBR064W	YBR064W	1	TRUE	+	1	73	1	chrII	367503	T	C	TRUE	0	0	1	0	-1	0	0	0.937	NA	FALSE	NA	NA	NA	497	84	50	FALSE	FALSE	FALSE	260	1.83	TRUE	0.063	0.063	FALSE
chrII_367531_C_T_+	YBR064W_chrII_367531_C_T_72_2	0.011226	-1.30408	0.135795	0.893613	0.965276	-6.73548	UpStream	YBR064W	YBR064W	1	TRUE	+	1	73	1	chrII	367531	C	T	TRUE	0	0	-1	0	1	0	0	0.937	NA	FALSE	NA	NA	NA	497	84	50	FALSE	FALSE	FALSE	232	1.58	TRUE	0.063	0.063	FALSE
chrII_369788_CT_CTT_-	YBR065C_chrII_369788_CT_CTT_72_2	0.112997	-1.2832	1.01897	0.322813	0.662071	-6.23864	UpStream	YBR065C	YBR065C	1	TRUE	-	1	73	1	chrII	369788	CT	CTT	FALSE	1	0	0	0	1	0	0	0.447	4.75766	FALSE	0.138143	0.110551	31	901	221	94	FALSE	TRUE	FALSE	110	4.75	TRUE	0.447	NA	NA
chrII_369831_G_C_-	YBR065C_chrII_369831_G_C_72_2	-0.145089	-0.0607566	-1.72832	0.102451	0.364823	-5.1767	UpStream	YBR065C	YBR065C	1	TRUE	-	1	73	1	chrII	369831	G	C	TRUE	0	0	1	-1	0	0	0	0.762	4.75766	FALSE	0.138143	0.110551	31	901	221	94	FALSE	TRUE	FALSE	153	4.75	TRUE	0.238	NA	NA
chrII_369847_A_C_-	YBR065C_5UTR_0_112	0.105115	-0.542072	1.65626	0.107955	0.360443	-5.54433	TSS	YBR065C	YBR065C	1	TRUE	-	3	18	3	chrII	369847	A	C	TRUE	0	-1	1	0	0	0	1	0.762	4.75766	FALSE	0.138143	0.110551	31	901	221	94	FALSE	TRUE	FALSE	169	4.75	TRUE	0.238	0.238	FALSE
chrII_370007_T_G_-	YBR065C_chrII_370007_T_G_72_2	0.445183	-1.32696	6.12266	1.24111e-05	0.000880403	3.36219	UpStream	YBR065C	YBR065C	1	TRUE	-	1	73	1	chrII	370007	T	G	TRUE	0	0	0	1	-1	0	0	0.42	4.75766	FALSE	0.138143	0.110551	31	901	221	94	FALSE	TRUE	FALSE	329	11.19	TRUE	0.42	0.42	TRUE
chrII_371029_A_G_-	YBR066C_chrII_371029_A_G_72_2	0.0174557	1.37242	0.105653	0.917122	0.973775	-6.09229	UpStream	YBR066C	YBR066C	1	TRUE	-	1	73	1	chrII	371029	A	G	TRUE	0	-1	0	1	0	0	0	0.477	5.82599	FALSE	0.140988	0.106217	6	799	99	28	FALSE	FALSE	TRUE	330	NA	FALSE	0.477	0.477	TRUE
chrII_372845_G_A_-	YBR067C_chrII_372845_G_A_72_2	0.268507	-0.949679	2.54633	0.021113	0.154746	-3.86974	UpStream	YBR067C	YBR067C	1	TRUE	-	1	73	1	chrII	372845	G	A	TRUE	0	1	0	-1	0	0	1	0.718	7.44829	FALSE	NA	NA	4	446	75	17	FALSE	FALSE	FALSE	110	4.09	TRUE	0.282	0.282	FALSE
chrII_372919_G_A_-	YBR067C_chrII_372919_G_A_72_2	0.702117	0.0202817	2.07464	0.0538713	0.26083	-3.9111	UpStream	YBR067C	YBR067C	1	TRUE	-	1	73	1	chrII	372919	G	A	TRUE	0	1	0	-1	0	0	0	0.009434	7.44829	FALSE	NA	NA	4	446	75	17	FALSE	FALSE	FALSE	184	4.09	TRUE	0.009434	0.009434	TRUE
chrII_372954_C_T_-	YBR067C_chrII_372954_C_T_72_2	-0.266121	0.0164803	-1.00854	0.327646	0.664665	-5.24293	UpStream	YBR067C	YBR067C	1	TRUE	-	1	73	1	chrII	372954	C	T	TRUE	0	0	-1	0	1	0	0	0.835	7.44829	FALSE	NA	NA	4	446	75	17	FALSE	FALSE	FALSE	219	4.09	TRUE	0.165	0.165	FALSE
chrII_372958_T_C_-	YBR067C_chrII_372958_T_C_72_2	-0.604892	0.33008	-6.46377	6.48793e-06	0.000630316	4.05747	UpStream	YBR067C	YBR067C	1	TRUE	-	1	73	1	chrII	372958	T	C	TRUE	0	0	1	0	-1	0	0	0.696	7.44829	FALSE	NA	NA	4	446	75	17	FALSE	FALSE	FALSE	223	NA	FALSE	0.304	0.304	FALSE
chrII_373454_GT_GTTT_-	YBR067C_chrII_373454_GT_GTTT_72_2	-0.0974954	0.543484	-0.978761	0.341722	0.679038	-6.10855	UpStream	YBR067C	YBR067C	1	TRUE	-	1	73	1	chrII	373454	GT	GTTT	FALSE	2	0	0	0	2	0	0	0.442	7.44829	FALSE	NA	NA	4	446	75	17	FALSE	FALSE	FALSE	719	3.5	TRUE	0.442	0.442	TRUE
chrII_373518_G_T_-	YBR067C_chrII_373518_G_T_72_2	0.263472	0.510425	3.18203	0.00557329	0.0703644	-2.62592	UpStream	YBR067C	YBR067C	1	TRUE	-	1	73	1	chrII	373518	G	T	TRUE	0	0	0	-1	1	0	0	0.001978	7.44829	FALSE	NA	NA	4	446	75	17	FALSE	FALSE	FALSE	783	3.18	TRUE	0.001978	0.001978	TRUE
chrII_373603_T_C_-	YBR067C_chrII_373603_T_C_72_2	0.182248	0.49507	2.23809	0.0392082	0.221713	-4.46455	UpStream	YBR067C	YBR067C	1	TRUE	-	1	73	1	chrII	373603	T	C	TRUE	0	0	1	0	-1	0	0	0.597	7.44829	FALSE	NA	NA	4	446	75	17	FALSE	FALSE	FALSE	868	2.18	TRUE	0.403	0.597	TRUE
chrII_375801_T_C_-	YBR068C_chrII_375801_T_C_72_2	0.0590769	-1.54514	0.625375	0.540212	0.815326	-6.48882	UpStream	YBR068C	YBR068C	1	TRUE	-	1	73	1	chrII	375801	T	C	TRUE	0	0	1	0	-1	0	-1	0.667	2.852	FALSE	NA	NA	22	717	92	29	FALSE	FALSE	TRUE	111	2.25	TRUE	0.333	0.333	FALSE
chrII_375972_G_A_-	YBR068C_chrII_375972_G_A_72_2	0.0755594	-0.20792	1.00097	0.331185	0.668502	-6.28523	UpStream	YBR068C	YBR068C	1	TRUE	-	1	73	1	chrII	375972	G	A	TRUE	0	1	0	-1	0	0	0	0.994	2.852	FALSE	NA	NA	22	717	92	29	FALSE	FALSE	TRUE	282	NA	FALSE	0.006	0.006	FALSE
chrII_378523_G_A_-	YBR069C_chrII_378523_G_A_72_2	-0.00984827	-1.62459	-0.0708426	0.944368	0.981349	-6.49967	UpStream	YBR069C	YBR069C	1	TRUE	-	1	73	1	chrII	378523	G	A	TRUE	0	1	0	-1	0	0	0	0.715	1.31497	FALSE	0.0877767	0.0636065	39	454	53	11	FALSE	FALSE	FALSE	90	NA	FALSE	0.285	0.285	FALSE
chrII_378868_C_G_-	YBR069C_chrII_378868_C_G_72_2	-1.05679	0.371474	-16.2919	1.18451e-11	1.3234e-08	16.6393	UpStream	YBR069C	YBR069C	1	TRUE	-	1	73	1	chrII	378868	C	G	TRUE	0	0	-1	1	0	0	0	0.788	1.31497	FALSE	0.0877767	0.0636065	39	454	53	11	FALSE	FALSE	FALSE	435	2.44	TRUE	0.212	0.212	FALSE
chrII_381364_C_G_+	YBR072W_chrII_381364_C_G_72_2	-0.304936	0.275048	-1.60209	0.127958	0.413359	-5.22147	UpStream	YBR072W	YBR072W	1	TRUE	+	1	73	1	chrII	381364	C	G	TRUE	0	0	-1	1	0	0	0	0.002967	8.85023	FALSE	0.0591161	0.0328617	49	470	83	23	FALSE	FALSE	FALSE	666	NA	FALSE	0.002967	0.002967	TRUE
chrII_381368_T_A_+	YBR072W_chrII_381368_T_A_72_2	-0.582247	0.230122	-1.21435	0.241577	0.577022	-4.96804	UpStream	YBR072W	YBR072W	1	TRUE	+	1	73	1	chrII	381368	T	A	TRUE	0	1	0	0	-1	0	0	0.002967	8.85023	FALSE	0.0591161	0.0328617	49	470	83	23	FALSE	FALSE	FALSE	662	NA	FALSE	0.002967	0.002967	TRUE
chrII_381431_A_T_+	YBR072W_chrII_381431_A_T_72_2	0.345798	-0.588933	1.29115	0.214312	0.540496	-5.21545	UpStream	YBR072W	YBR072W	1	TRUE	+	1	73	1	chrII	381431	A	T	TRUE	0	-1	0	0	1	0	0	0.902	8.85023	FALSE	0.0591161	0.0328617	49	470	83	23	FALSE	FALSE	FALSE	599	NA	FALSE	0.098	0.098	FALSE
chrII_381433_C_G_+	YBR072W_chrII_381433_C_G_72_2	0.213802	-0.535454	0.644349	0.528137	0.808458	-6.1033	UpStream	YBR072W	YBR072W	1	TRUE	+	1	73	1	chrII	381433	C	G	TRUE	0	0	-1	1	0	0	0	0.204	8.85023	FALSE	0.0591161	0.0328617	49	470	83	23	FALSE	FALSE	FALSE	597	NA	FALSE	0.204	0.204	TRUE
chrII_381522_T_C_+	YBR072W_chrII_381522_T_C_72_2	-0.155206	-0.846078	-1.11503	0.280693	0.616119	-6.0146	UpStream	YBR072W	YBR072W	1	TRUE	+	1	73	1	chrII	381522	T	C	TRUE	0	0	1	0	-1	0	0	0.714	8.85023	FALSE	0.0591161	0.0328617	49	470	83	23	FALSE	FALSE	FALSE	508	NA	FALSE	0.286	0.714	TRUE
chrII_381543_CGTGT_C_+	YBR072W_chrII_381543_CGTGT_C_72_2	-0.145908	-0.537286	-1.085	0.293401	0.629447	-6.02059	UpStream	YBR072W	YBR072W	1	TRUE	+	1	71	1	chrII	381543	CGTGT	C	FALSE	-4	0	0	-2	-2	0	0	0.868	8.85023	FALSE	0.0591161	0.0328617	49	470	83	23	FALSE	FALSE	FALSE	487	NA	FALSE	0.132	0.132	FALSE
chrII_381550_ACCCCTAACTCCGTG_A_+	YBR072W_chrII_381550_ACCCCTAACTCCGTG_A_72_2	0.000643426	-0.779963	0.0041001	0.996777	0.998494	-6.61224	UpStream	YBR072W	YBR072W	1	TRUE	+	1	66	1	chrII	381550	ACCCCTAACTCCGTG	A	FALSE	-14	-2	-7	-2	-3	0	1	0.865	8.85023	FALSE	0.0591161	0.0328617	49	470	83	23	FALSE	FALSE	FALSE	480	NA	FALSE	0.135	0.135	FALSE
chrII_381922_A_G_+	YBR072W_chrII_381922_A_G_72_2	0.0278392	-0.338051	0.17479	0.863355	0.954797	-6.36015	UpStream	YBR072W	YBR072W	1	TRUE	+	1	73	1	chrII	381922	A	G	TRUE	0	-1	0	1	0	0	0	0.28	8.85023	FALSE	0.0591161	0.0328617	49	470	83	23	FALSE	FALSE	FALSE	108	NA	FALSE	0.28	0.28	TRUE
chrII_386202_A_G_+	YBR074W_chrII_386202_A_G_72_2	0.21235	-0.35151	1.67274	0.113082	0.386957	-5.09872	UpStream	YBR074W	YBR074W	1	TRUE	+	1	73	1	chrII	386202	A	G	TRUE	0	-1	0	1	0	0	0	0.377	5.42655	FALSE	NA	NA	2	482	130	51	FALSE	TRUE	FALSE	84	NA	FALSE	0.377	0.377	TRUE
chrII_389243_T_C_+	YBR076W_chrII_389243_T_C_72_2	0.0796463	-2.46529	0.673292	0.51001	0.798937	-6.43113	UpStream	YBR076W	YBR076W	1	TRUE	+	1	73	1	chrII	389243	T	C	TRUE	0	0	1	0	-1	0	0	0.69	NA	FALSE	NA	NA	NA	1300	424	174	FALSE	FALSE	FALSE	984	2.8	TRUE	0.31	0.31	FALSE
chrII_389557_G_A_+	YBR076W_chrII_389557_G_A_72_2	-0.158476	-2.2226	-1.83175	0.0849598	0.32619	-5.22242	UpStream	YBR076W	YBR076W	1	TRUE	+	1	73	1	chrII	389557	G	A	TRUE	0	1	0	-1	0	0	0	0.649	NA	FALSE	NA	NA	NA	1300	424	174	FALSE	FALSE	FALSE	670	2.91	TRUE	0.351	0.351	FALSE
chrII_389687_T_C_+	YBR076W_chrII_389687_T_C_72_2	-0.625088	-2.38313	-3.61405	0.00220777	0.0372322	-1.38806	UpStream	YBR076W	YBR076W	1	TRUE	+	1	73	1	chrII	389687	T	C	TRUE	0	0	1	0	-1	0	-1	0.53	NA	FALSE	NA	NA	NA	1300	424	174	FALSE	FALSE	FALSE	540	2.94	TRUE	0.47	0.53	TRUE
chrII_389867_C_T_+	YBR076W_chrII_389867_C_T_72_2	-0.331211	-0.668054	-2.82655	0.0118197	0.110507	-3.3713	UpStream	YBR076W	YBR076W	1	TRUE	+	1	73	1	chrII	389867	C	T	TRUE	0	0	-1	0	1	0	0	0.682	NA	FALSE	NA	NA	NA	1300	424	174	FALSE	FALSE	FALSE	360	1.7	TRUE	0.318	0.318	FALSE
chrII_392511_C_CA_-	YBR077C_chrII_392511_C_CA_72_2	0.0294484	1.00384	0.110646	0.913222	0.971711	-5.83234	UpStream	YBR077C	YBR077C	1	TRUE	-	1	73	1	chrII	392511	C	CA	FALSE	1	1	0	0	0	0	0	0.436	6.22599	FALSE	NA	NA	12	769	202	52	FALSE	FALSE	FALSE	218	NA	FALSE	0.436	0.436	TRUE
chrII_392511_C_CA_+	YBR078W_chrII_392511_C_CA_72_2	0.0517708	2.04694	0.709616	0.487773	0.790336	-6.64353	UpStream	YBR078W	YBR078W	1	TRUE	+	1	73	1	chrII	392511	C	CA	FALSE	1	1	0	0	0	0	0	0.436	9.99974	FALSE	NA	NA	11	786	350	136	FALSE	FALSE	TRUE	612	NA	FALSE	0.436	0.436	TRUE
chrII_392522_G_A_-	YBR077C_chrII_392522_G_A_72_2	-0.627923	1.56273	-2.94028	0.0093073	0.0947479	-2.50749	UpStream	YBR077C	YBR077C	1	TRUE	-	1	73	1	chrII	392522	G	A	TRUE	0	1	0	-1	0	0	0	0.832	6.22599	FALSE	NA	NA	12	769	202	52	FALSE	FALSE	FALSE	229	NA	FALSE	0.168	0.832	TRUE
chrII_392522_G_A_+	YBR078W_chrII_392522_G_A_72_2	0.178944	2.3443	2.52034	0.0222637	0.157431	-4.06168	UpStream	YBR078W	YBR078W	1	TRUE	+	1	73	1	chrII	392522	G	A	TRUE	0	1	0	-1	0	0	0	0.832	9.99974	FALSE	NA	NA	11	786	350	136	FALSE	FALSE	TRUE	601	NA	FALSE	0.168	0.832	TRUE
chrII_392785_T_G_+	YBR078W_chrII_392785_T_G_72_2	-0.0234938	0.0345007	-0.291332	0.774399	0.926665	-6.7852	UpStream	YBR078W	YBR078W	1	TRUE	+	1	73	1	chrII	392785	T	G	TRUE	0	0	0	1	-1	0	0	0.949	9.99974	FALSE	NA	NA	11	786	350	136	FALSE	FALSE	TRUE	338	NA	FALSE	0.051	0.051	FALSE
chrII_392785_T_G_-	YBR077C_chrII_392785_T_G_72_2	0.175656	0.137951	2.01049	0.0608828	0.27651	-4.76015	UpStream	YBR077C	YBR077C	1	TRUE	-	1	73	1	chrII	392785	T	G	TRUE	0	0	0	1	-1	0	0	0.949	6.22599	FALSE	NA	NA	12	769	202	52	FALSE	FALSE	FALSE	492	NA	FALSE	0.051	0.051	FALSE
chrII_392874_A_ATCTTTCCTCTGCATTT_-	YBR077C_chrII_392874_A_ATCTTTCCTCTGCATTT_72_2	0.0261747	-0.992415	0.331191	0.744637	0.916744	-6.7191	UpStream	YBR077C	YBR077C	1	TRUE	-	1	67	1	chrII	392874	A	ATCTTTCCTCTGCATTT	FALSE	16	1	5	1	9	0	1	0.287	6.22599	FALSE	NA	NA	12	769	202	52	FALSE	FALSE	FALSE	581	0.99	TRUE	0.287	0.287	TRUE
chrII_392874_A_ATCTTTCCTCTGCATTT_+	YBR078W_chrII_392874_A_ATCTTTCCTCTGCATTT_72_2	0.0269445	-0.851296	0.279127	0.783589	0.93075	-6.60673	UpStream	YBR078W	YBR078W	1	TRUE	+	1	67	1	chrII	392874	A	ATCTTTCCTCTGCATTT	FALSE	16	1	5	1	9	0	0	0.287	9.99974	FALSE	NA	NA	11	786	350	136	FALSE	FALSE	TRUE	249	0.99	TRUE	0.287	0.287	TRUE
chrII_398314_G_A_-	YBR079C_5UTR_0_21	-0.0788264	1.85013	-0.379993	0.706592	0.882788	-5.58366	TSS	YBR079C	YBR079C	1	TRUE	-	2	133	1	chrII	398314	G	A	TRUE	0	1	0	-1	0	0	0	0.658	7.22402	TRUE	NA	NA	100	1729	435	127	FALSE	TRUE	FALSE	37	3.55	TRUE	0.342	NA	NA
chrII_398429_T_G_-	YBR079C_chrII_398429_T_G_72_2	0.120018	1.85209	1.08785	0.292176	0.628059	-5.81687	UpStream	YBR079C	YBR079C	1	TRUE	-	1	73	1	chrII	398429	T	G	TRUE	0	0	0	1	-1	0	0	0.221	7.22402	TRUE	NA	NA	100	1729	435	127	FALSE	TRUE	FALSE	152	NA	FALSE	0.221	0.221	TRUE
chrII_405666_C_A_-	YBR081C_chrII_405666_C_A_72_2	-0.0529895	-1.0902	-0.473806	0.641799	0.870819	-6.64017	UpStream	YBR081C	YBR081C	1	TRUE	-	1	73	1	chrII	405666	C	A	TRUE	0	1	-1	0	0	0	0	0.723	4.87567	FALSE	NA	NA	171	NA	NA	NA	FALSE	FALSE	FALSE	415	1.85	TRUE	0.277	NA	NA
chrII_405695_A_C_+	tR(UCU)B_chrII_405695_A_C_72_2	0.147623	-2.15301	1.10464	0.285043	0.61993	-5.93661	UpStream	tR(UCU)B	tR(UCU)B	1	TRUE	+	1	73	1	chrII	405695	A	C	TRUE	0	-1	1	0	0	0	-1	0.612	NA	FALSE	NA	NA	1	NA	NA	NA	FALSE	FALSE	FALSE	183	1.85	TRUE	0.388	NA	NA
chrII_405845_T_A_-	YBR081C_chrII_405845_T_A_72_2	0.0342385	-0.425879	0.305119	0.764061	0.922329	-6.55267	UpStream	YBR081C	YBR081C	1	TRUE	-	1	73	1	chrII	405845	T	A	TRUE	0	1	0	0	-1	0	0	0.629	4.87567	FALSE	NA	NA	171	NA	NA	NA	FALSE	FALSE	FALSE	594	NA	FALSE	0.371	0.629	TRUE
chrII_405851_A_T_-	YBR081C_chrII_405851_A_T_72_2	0.10055	-0.392114	0.866132	0.398741	0.730381	-6.20325	UpStream	YBR081C	YBR081C	1	TRUE	-	1	73	1	chrII	405851	A	T	TRUE	0	-1	0	0	1	0	0	0.297	4.87567	FALSE	NA	NA	171	NA	NA	NA	FALSE	FALSE	FALSE	600	NA	FALSE	0.297	0.297	TRUE
chrII_408107_A_G_-	YBR082C_chrII_408107_A_G_72_2	-0.123454	-0.0573339	-1.29471	0.213107	0.539079	-5.65474	UpStream	YBR082C	YBR082C	1	TRUE	-	1	73	1	chrII	408107	A	G	TRUE	0	-1	0	1	0	0	0	0.722	9.70101	FALSE	NA	NA	53	648	421	213	FALSE	FALSE	TRUE	938	1.41	TRUE	0.278	0.278	FALSE
chrII_408801_T_C_+	YBR083W_5UTR_0_21	-0.0509536	-0.786565	-0.99675	0.326752	0.624492	-6.77499	TSS	YBR083W	YBR083W	1	TRUE	+	2	52	1	chrII	408801	T	C	TRUE	0	0	1	0	-1	0	0	0.77	6.37522	FALSE	NA	NA	22	781	149	48	TRUE	FALSE	FALSE	368	NA	FALSE	0.23	0.23	FALSE
chrII_408838_A_G_+	YBR083W_5UTR_0_12	0.0281862	-0.74508	0.460486	0.648444	0.852379	-7.09568	TSS	YBR083W	YBR083W	1	TRUE	+	2	89	2	chrII	408838	A	G	TRUE	0	-1	0	1	0	0	0	0.231	6.37522	FALSE	NA	NA	22	781	149	48	TRUE	FALSE	FALSE	331	NA	FALSE	0.231	0.231	TRUE
chrII_410961_G_A_+	YBR084W_5UTR_0_2111	-0.0205754	0.479443	-0.287822	0.775436	0.911836	-6.6419	TSS	YBR084W	YBR084W	1	TRUE	+	4	66	1	chrII	410961	G	A	TRUE	0	1	0	-1	0	0	0	0.614	6.6409	FALSE	NA	NA	53	943	359	120	FALSE	TRUE	FALSE	93	NA	FALSE	0.386	0.614	TRUE
chrII_410985_A_G_+	YBR084W_5UTR_0_1211	-0.134313	0.42483	-1.75708	0.0889704	0.320695	-5.15422	TSS	YBR084W	YBR084W	1	TRUE	+	4	90	2	chrII	410985	A	G	TRUE	0	-1	0	1	0	0	0	0.956	6.6409	FALSE	NA	NA	53	943	359	120	FALSE	TRUE	FALSE	69	2.88	TRUE	0.044	0.044	FALSE
chrII_410998_C_T_+	YBR084W_5UTR_0_1121	-0.00240766	0.494912	-0.0287242	0.977272	0.993902	-6.58496	TSS	YBR084W	YBR084W	1	TRUE	+	4	103	3	chrII	410998	C	T	TRUE	0	0	-1	0	1	0	0	0.615	6.6409	FALSE	NA	NA	53	943	359	120	FALSE	TRUE	FALSE	56	2.88	TRUE	0.385	0.615	TRUE
chrII_411003_C_T_+	YBR084W_5UTR_0_1112	-0.0872507	0.446646	-1.01126	0.319873	0.614828	-6.17055	TSS	YBR084W	YBR084W	1	TRUE	+	4	108	4	chrII	411003	C	T	TRUE	0	0	-1	0	1	0	0	0.981	6.6409	FALSE	NA	NA	53	943	359	120	FALSE	TRUE	FALSE	51	2.88	TRUE	0.019	0.019	FALSE
chrII_415314_T_A_-	YBR084C-A_5UTR_0_2	-0.0318181	0.324625	-0.715987	0.479462	0.745005	-6.97381	TSS	YBR084C-A	YBR084C-A	1	TRUE	-	1	114	1	chrII	415314	T	A	TRUE	0	1	0	0	-1	0	0	0.612	10.9363	FALSE	NA	NA	29	631	237	74	FALSE	TRUE	TRUE	53	3.86	TRUE	0.388	0.612	TRUE
chrII_415599_C_A_+	YBR085W_chrII_415599_C_A_72_2	-0.0121696	1.37992	-0.187827	0.853285	0.951667	-6.82246	UpStream	YBR085W	YBR085W	1	TRUE	+	1	73	1	chrII	415599	C	A	TRUE	0	1	-1	0	0	0	0	0.615	1.8986	FALSE	NA	NA	20	1012	396	180	FALSE	TRUE	TRUE	384	NA	FALSE	0.385	NA	NA
chrII_415620_C_A_-	YBR084C-A_chrII_415620_C_A_72_2	0.426426	2.38652	3.67285	0.0019456	0.0342319	-1.29422	UpStream	YBR084C-A	YBR084C-A	1	TRUE	-	1	73	1	chrII	415620	C	A	TRUE	0	1	-1	0	0	0	0	0.623	10.9363	FALSE	NA	NA	29	631	237	74	FALSE	TRUE	TRUE	359	NA	FALSE	0.377	0.623	TRUE
chrII_415724_A_T_-	YBR084C-A_chrII_415724_A_T_72_2	0.0765521	1.8607	0.45379	0.655846	0.875702	-6.04636	UpStream	YBR084C-A	YBR084C-A	1	TRUE	-	1	73	1	chrII	415724	A	T	TRUE	0	-1	0	0	1	0	0	0.977	10.9363	FALSE	NA	NA	29	631	237	74	FALSE	TRUE	TRUE	463	6.58	TRUE	0.023	0.023	FALSE
chrII_415764_C_CTTTT_+	YBR085W_chrII_415764_C_CTTTT_72_2	1.06639	-0.131678	1.78362	0.0927426	0.341687	-4.24406	UpStream	YBR085W	YBR085W	1	TRUE	+	1	73	1	chrII	415764	C	CTTTT	FALSE	4	0	0	0	4	0	0	0.193	1.8986	FALSE	NA	NA	20	1012	396	180	FALSE	TRUE	TRUE	219	6.58	TRUE	0.193	NA	NA
chrII_419386_CAA_CA_-	YBR085C-A_chrII_419386_CAA_CA_72_2	0.204074	1.27337	2.5727	0.0200039	0.151009	-3.80109	UpStream	YBR085C-A	YBR085C-A	1	TRUE	-	1	74	1	chrII	419386	CAA	CA	FALSE	-1	-1	0	0	0	0	0	0.988	9.56488	FALSE	0.0354055	0.0252979	4	112	36	10	FALSE	FALSE	FALSE	222	NA	FALSE	0.012	0.012	FALSE
chrII_419913_C_G_-	YBR085C-A_chrII_419913_C_G_72_2	0.0469881	-0.244581	0.409649	0.687292	0.894566	-6.55897	UpStream	YBR085C-A	YBR085C-A	1	TRUE	-	1	73	1	chrII	419913	C	G	TRUE	0	0	-1	1	0	0	0	0.99	9.56488	FALSE	0.0354055	0.0252979	4	112	36	10	FALSE	FALSE	FALSE	749	NA	FALSE	0.01	0.01	FALSE
chrII_419943_C_A_-	YBR085C-A_chrII_419943_C_A_72_2	-0.412664	-0.457345	-2.14439	0.0470882	0.246551	-4.24619	UpStream	YBR085C-A	YBR085C-A	1	TRUE	-	1	73	1	chrII	419943	C	A	TRUE	0	1	-1	0	0	0	0	0.196	9.56488	FALSE	0.0354055	0.0252979	4	112	36	10	FALSE	FALSE	FALSE	779	NA	FALSE	0.196	0.196	TRUE
chrII_423351_G_A_+	YBR087W_chrII_423351_G_A_72_2	-0.063074	0.774407	-0.665133	0.515085	0.80234	-6.42758	UpStream	YBR087W	YBR087W	1	TRUE	+	1	73	1	chrII	423351	G	A	TRUE	0	1	0	-1	0	0	-1	0.673	5.95772	TRUE	0.0539296	0.0385876	38	938	295	132	FALSE	TRUE	FALSE	414	NA	FALSE	0.327	0.327	FALSE
chrII_423351_G_A_-	YBR086C_5UTR_0_211	0.184254	0.333473	3.16397	0.00352054	0.0452748	-2.44651	TSS	YBR086C	YBR086C	1	TRUE	-	3	126	1	chrII	423351	G	A	TRUE	0	1	0	-1	0	0	0	0.673	6.62939	FALSE	0.1767	0.123665	33	1019	221	83	FALSE	FALSE	FALSE	310	NA	FALSE	0.327	0.327	FALSE
chrII_423387_G_GGAA_-	YBR086C_5UTR_0_121	-0.175681	0.158601	-2.55976	0.0156779	0.12017	-3.81485	TSS	YBR086C	YBR086C	1	TRUE	-	3	90	2	chrII	423387	G	GGAA	FALSE	3	2	0	1	0	0	0	0.317	6.62939	FALSE	0.1767	0.123665	33	1019	221	83	FALSE	FALSE	FALSE	346	NA	FALSE	0.317	NA	NA
chrII_423438_GA_G_-	YBR086C_5UTR_0_112	0.0303192	0.256478	0.572981	0.570871	0.807611	-6.77027	TSS	YBR086C	YBR086C	1	TRUE	-	3	39	3	chrII	423438	GA	G	FALSE	-1	-1	0	0	0	0	0	0.889	6.62939	FALSE	0.1767	0.123665	33	1019	221	83	FALSE	FALSE	FALSE	397	NA	FALSE	0.111	NA	NA
chrII_423698_G_T_+	YBR087W_5UTR_0_2	0.100781	0.496032	1.67432	0.104326	0.35142	-5.63675	TSS	YBR087W	YBR087W	1	TRUE	+	1	89	1	chrII	423698	G	T	TRUE	0	0	0	-1	1	0	0	0.848	5.95772	TRUE	0.0539296	0.0385876	38	938	295	132	FALSE	TRUE	FALSE	67	NA	FALSE	0.152	0.152	FALSE
chrII_427545_A_G_-	YBR091C_5UTR_0_21	-0.0974821	-0.215854	-2.10473	0.0436817	0.22173	-5.09274	TSS	YBR091C	YBR091C	1	TRUE	-	2	125	1	chrII	427545	A	G	TRUE	0	-1	0	1	0	0	0	0.556	5.83019	TRUE	NA	NA	15	NA	NA	NA	FALSE	FALSE	FALSE	61	1.8	TRUE	0.444	0.556	TRUE
chrII_427659_GTATT_G_-	YBR091C_5UTR_0_12	0.0190681	-0.157816	0.385853	0.702292	0.88259	-7.14935	TSS	YBR091C	YBR091C	1	TRUE	-	2	11	2	chrII	427659	GTATT	G	FALSE	-4	-1	0	0	-3	0	0	0.559	5.83019	TRUE	NA	NA	15	NA	NA	NA	FALSE	FALSE	FALSE	175	3.81	TRUE	0.441	0.441	FALSE
chrII_429183_T_A_-	YBR092C_5UTR_0_21	-0.243658	1.82182	-3.09392	0.00421333	0.0516433	-2.48162	TSS	YBR092C	YBR092C	1	TRUE	-	2	92	1	chrII	429183	T	A	TRUE	0	1	0	0	-1	0	0	0.6	5.02959	FALSE	NA	NA	1	436	66	16	FALSE	FALSE	FALSE	82	2.58	TRUE	0.4	0.4	FALSE
chrII_429199_G_A_-	YBR092C_5UTR_0_12	-0.334852	1.77761	-4.24807	0.000188206	0.004682	0.464484	TSS	YBR092C	YBR092C	1	TRUE	-	2	76	2	chrII	429199	G	A	TRUE	0	1	0	-1	0	1	0	0.585	5.02959	FALSE	NA	NA	1	436	66	16	FALSE	FALSE	FALSE	98	2.58	TRUE	0.415	0.585	TRUE
chrII_431229_A_G_+	YBR094W_chrII_431229_A_G_72_2	-0.0344525	-0.398022	-0.317987	0.754453	0.920581	-6.54111	UpStream	YBR094W	YBR094W	1	TRUE	+	1	73	1	chrII	431229	A	G	TRUE	0	-1	0	1	0	0	0	0.976	4.96009	FALSE	NA	NA	13	638	107	52	FALSE	FALSE	FALSE	807	7.63	TRUE	0.024	0.024	FALSE
chrII_431446_A_G_+	YBR094W_chrII_431446_A_G_72_2	-0.0163716	0.0695881	-0.190155	0.851489	0.950913	-6.71445	UpStream	YBR094W	YBR094W	1	TRUE	+	1	73	1	chrII	431446	A	G	TRUE	0	-1	0	1	0	0	0	0.004451	4.96009	FALSE	NA	NA	13	638	107	52	FALSE	FALSE	FALSE	590	2.51	TRUE	0.004451	0.004451	TRUE
chrII_431479_A_G_+	YBR094W_chrII_431479_A_G_72_2	-0.177249	0.193686	-2.86051	0.0110077	0.105114	-3.46909	UpStream	YBR094W	YBR094W	1	TRUE	+	1	73	1	chrII	431479	A	G	TRUE	0	-1	0	1	0	0	1	0.623	4.96009	FALSE	NA	NA	13	638	107	52	FALSE	FALSE	FALSE	557	NA	FALSE	0.377	0.623	TRUE
chrII_431663_G_A_+	YBR094W_chrII_431663_G_A_72_2	0.304575	-2.97517	2.62193	0.0180797	0.14263	-3.73852	UpStream	YBR094W	YBR094W	1	TRUE	+	1	73	1	chrII	431663	G	A	TRUE	0	1	0	-1	0	0	0	0.657	4.96009	FALSE	NA	NA	13	638	107	52	FALSE	FALSE	FALSE	373	3.1	TRUE	0.343	0.657	TRUE
chrII_431703_C_T_+	YBR094W_chrII_431703_C_T_72_2	-0.0727616	-0.575778	-0.81816	0.424834	0.746885	-6.42581	UpStream	YBR094W	YBR094W	1	TRUE	+	1	73	1	chrII	431703	C	T	TRUE	0	0	-1	0	1	0	0	0.824	4.96009	FALSE	NA	NA	13	638	107	52	FALSE	FALSE	FALSE	333	3.13	TRUE	0.176	0.176	FALSE
chrII_431781_A_G_+	YBR094W_chrII_431781_A_G_72_2	-0.0111691	-0.116724	-0.122444	0.904015	0.968745	-6.60781	UpStream	YBR094W	YBR094W	1	TRUE	+	1	73	1	chrII	431781	A	G	TRUE	0	-1	0	1	0	0	0	0.869	4.96009	FALSE	NA	NA	13	638	107	52	FALSE	FALSE	FALSE	255	3.13	TRUE	0.131	0.131	FALSE
chrII_431851_C_G_-	YBR093C_chrII_431851_C_G_72_2	-0.134665	0.378589	-1.40663	0.177948	0.489986	-5.73074	UpStream	YBR093C	YBR093C	1	TRUE	-	1	73	1	chrII	431851	C	G	TRUE	0	0	-1	1	0	0	0	0.624	4.50178	FALSE	NA	NA	7	522	63	19	FALSE	FALSE	FALSE	900	NA	FALSE	0.376	0.624	TRUE
chrII_431851_C_G_+	YBR094W_5UTR_0_21	-0.196344	-0.429744	-1.63343	0.112693	0.367329	-5.35228	TSS	YBR094W	YBR094W	1	TRUE	+	2	26	1	chrII	431851	C	G	TRUE	0	0	-1	1	0	0	0	0.624	4.96009	FALSE	NA	NA	13	638	107	52	FALSE	FALSE	FALSE	185	NA	FALSE	0.376	0.624	TRUE
chrII_431912_A_T_+	YBR094W_5UTR_0_12	-0.121285	-0.390301	-1.81474	0.0794404	0.30298	-5.17502	TSS	YBR094W	YBR094W	1	TRUE	+	2	87	2	chrII	431912	A	T	TRUE	0	-1	0	0	1	0	0	0.437	4.96009	FALSE	NA	NA	13	638	107	52	FALSE	FALSE	FALSE	124	NA	FALSE	0.437	0.437	TRUE
chrII_435843_G_A_-	YBR095C_5UTR_0_2	0.03518	-0.237815	0.554957	0.582984	0.815748	-6.86338	TSS	YBR095C	YBR095C	1	TRUE	-	1	24	1	chrII	435843	G	A	TRUE	0	1	0	-1	0	0	0	0.649	5.82861	FALSE	0.106706	0.080299	33	1216	648	338	FALSE	FALSE	FALSE	145	3.57	TRUE	0.351	0.649	TRUE
chrII_435843_G_A_+	YBR096W_chrII_435843_G_A_72_2	-0.289628	-0.954965	-2.73598	0.0142786	0.124101	-3.40473	UpStream	YBR096W	YBR096W	1	TRUE	+	1	73	1	chrII	435843	G	A	TRUE	0	1	0	-1	0	0	0	0.649	7.06548	FALSE	0.0920504	0.0633468	3	553	127	44	FALSE	FALSE	FALSE	178	3.57	TRUE	0.351	0.649	TRUE
chrII_449537_G_T_+	YBR104W_5UTR_0_2	-0.256133	-0.840992	-1.03319	0.309664	0.603733	-5.51658	TSS	YBR104W	YBR104W	1	TRUE	+	1	103	1	chrII	449537	G	T	TRUE	0	0	0	-1	1	0	0	0.029	6.36202	FALSE	NA	NA	2	884	146	51	FALSE	FALSE	TRUE	130	3.38	TRUE	0.029	0.029	TRUE
chrII_452218_A_G_+	YBR106W_chrII_452218_A_G_72_2	-0.353173	2.05304	-5.94286	1.75811e-05	0.00105893	2.9688	UpStream	YBR106W	YBR106W	1	TRUE	+	1	73	1	chrII	452218	A	G	TRUE	0	-1	0	1	0	0	0	0.976	9.57855	FALSE	0.0638981	0.0286219	144	NA	NA	NA	FALSE	FALSE	FALSE	440	NA	FALSE	0.024	0.024	FALSE
chrII_452218_A_G_-	YBR105C_chrII_452218_A_G_72_2	-0.540305	1.70656	-3.83328	0.00137818	0.0266628	-0.971697	UpStream	YBR105C	YBR105C	1	TRUE	-	1	73	1	chrII	452218	A	G	TRUE	0	-1	0	1	0	0	0	0.976	4.83331	FALSE	0.120454	0.0900532	22	1007	350	155	FALSE	TRUE	FALSE	249	NA	FALSE	0.024	0.024	FALSE
chrII_452274_G_GA_+	YBR106W_chrII_452274_G_GA_72_2	0.00298196	2.92335	0.039232	0.969173	0.989318	-6.79123	UpStream	YBR106W	YBR106W	1	TRUE	+	1	73	1	chrII	452274	G	GA	FALSE	1	1	0	0	0	0	0	0.589	9.57855	FALSE	0.0638981	0.0286219	144	NA	NA	NA	FALSE	FALSE	FALSE	384	NA	FALSE	0.411	NA	NA
chrII_452365_T_C_-	YBR105C_chrII_452365_T_C_72_2	-0.00833341	1.70592	-0.04701	0.963065	0.987898	-5.86779	UpStream	YBR105C	YBR105C	1	TRUE	-	1	73	1	chrII	452365	T	C	TRUE	0	0	1	0	-1	0	1	0.713	4.83331	FALSE	0.120454	0.0900532	22	1007	350	155	FALSE	TRUE	FALSE	396	6.19	TRUE	0.287	0.287	FALSE
chrII_452394_G_GAAGA_-	YBR105C_chrII_452394_G_GAAGA_72_2	0.0743109	1.095	0.217102	0.83077	0.945432	-5.6039	UpStream	YBR105C	YBR105C	1	TRUE	-	1	73	1	chrII	452394	G	GAAGA	FALSE	4	3	0	1	0	0	0	0.91	4.83331	FALSE	0.120454	0.0900532	22	1007	350	155	FALSE	TRUE	FALSE	425	6.19	TRUE	0.09	0.91	TRUE
chrII_452394_G_GAAGA_+	YBR106W_chrII_452394_G_GAAGA_72_2	-0.451524	1.60041	-3.19644	0.00540454	0.0696945	-2.19383	UpStream	YBR106W	YBR106W	1	TRUE	+	1	73	1	chrII	452394	G	GAAGA	FALSE	4	3	0	1	0	0	0	0.91	9.57855	FALSE	0.0638981	0.0286219	144	NA	NA	NA	FALSE	FALSE	FALSE	264	6.19	TRUE	0.09	0.91	TRUE
chrII_452408_C_T_-	YBR105C_chrII_452408_C_T_72_2	-0.0102936	1.05146	-0.117022	0.908245	0.970481	-6.62025	UpStream	YBR105C	YBR105C	1	TRUE	-	1	73	1	chrII	452408	C	T	TRUE	0	0	-1	0	1	0	1	0.828	4.83331	FALSE	0.120454	0.0900532	22	1007	350	155	FALSE	TRUE	FALSE	439	6.19	TRUE	0.172	0.172	FALSE
chrII_452408_C_T_+	YBR106W_chrII_452408_C_T_72_2	0.194572	2.11426	0.622037	0.542352	0.816634	-5.51055	UpStream	YBR106W	YBR106W	1	TRUE	+	1	73	1	chrII	452408	C	T	TRUE	0	0	-1	0	1	0	0	0.828	9.57855	FALSE	0.0638981	0.0286219	144	NA	NA	NA	FALSE	FALSE	FALSE	250	6.19	TRUE	0.172	0.172	FALSE
chrII_452435_CTT_CT_-	YBR105C_chrII_452435_CTT_CT_72_2	-0.113277	0.967693	-1.24686	0.229724	0.56131	-5.88244	UpStream	YBR105C	YBR105C	1	TRUE	-	1	74	1	chrII	452435	CTT	CT	FALSE	-1	0	0	0	-1	0	0	0.234	4.83331	FALSE	0.120454	0.0900532	22	1007	350	155	FALSE	TRUE	FALSE	466	6.19	TRUE	0.234	NA	NA
chrII_452435_CTT_CT_+	YBR106W_chrII_452435_CTT_CT_72_2	-0.0222587	1.60758	-0.335682	0.741308	0.915673	-6.68966	UpStream	YBR106W	YBR106W	1	TRUE	+	1	72	1	chrII	452435	CTT	CT	FALSE	-1	0	0	0	-1	0	0	0.234	9.57855	FALSE	0.0638981	0.0286219	144	NA	NA	NA	FALSE	FALSE	FALSE	223	6.19	TRUE	0.234	NA	NA
chrII_452575_ATAAG_A_+	YBR106W_5UTR_0_2	0.0482053	1.03223	0.894123	0.378279	0.670185	-6.80535	TSS	YBR106W	YBR106W	1	TRUE	+	1	95	1	chrII	452575	ATAAG	A	FALSE	-4	-2	0	-1	-1	0	0	0.441	9.57855	FALSE	0.0638981	0.0286219	144	NA	NA	NA	FALSE	FALSE	FALSE	83	4.3	TRUE	0.441	0.441	TRUE
chrII_452575_ATAAG_A_-	YBR105C_chrII_452575_ATAAG_A_72_2	0.0519036	0.0944881	0.162252	0.873063	0.956036	-5.73339	UpStream	YBR105C	YBR105C	1	TRUE	-	1	75	1	chrII	452575	ATAAG	A	FALSE	-4	-2	0	-1	-1	0	0	0.441	4.83331	FALSE	0.120454	0.0900532	22	1007	350	155	FALSE	TRUE	FALSE	606	4.3	TRUE	0.441	0.441	TRUE
chrII_454587_A_G_-	YBR107C_5UTR_0_211	-0.331593	-0.820505	-2.43933	0.0207563	0.145486	-3.65134	TSS	YBR107C	YBR107C	1	TRUE	-	3	137	1	chrII	454587	A	G	TRUE	0	-1	0	1	0	0	0	0.492	4.57814	FALSE	0.129531	0.0923106	32	703	261	106	FALSE	FALSE	FALSE	57	1.5	TRUE	0.492	0.492	TRUE
chrII_454598_C_T_-	YBR107C_5UTR_0_121	0.0322816	-0.630997	0.209314	0.835599	0.937409	-6.23673	TSS	YBR107C	YBR107C	1	TRUE	-	3	126	2	chrII	454598	C	T	TRUE	0	0	-1	0	1	0	0	0.631	4.57814	FALSE	0.129531	0.0923106	32	703	261	106	FALSE	FALSE	FALSE	68	NA	FALSE	0.369	0.631	TRUE
chrII_454598_C_T_+	YBR108W_chrII_454598_C_T_72_2	0.194509	-0.248289	1.2796	0.21825	0.547338	-5.53632	UpStream	YBR108W	YBR108W	1	TRUE	+	1	73	1	chrII	454598	C	T	TRUE	0	0	-1	0	1	0	0	0.631	4.30758	FALSE	NA	NA	38	971	228	74	FALSE	FALSE	FALSE	224	NA	FALSE	0.369	0.631	TRUE
chrII_454635_A_ATT_-	YBR107C_chrII_454635_A_ATT_72_2	0.225674	0.191765	2.64524	0.0172313	0.138538	-3.73403	UpStream	YBR107C	YBR107C	1	TRUE	-	1	73	1	chrII	454635	A	ATT	FALSE	2	0	0	0	2	0	0	0.586	4.57814	FALSE	0.129531	0.0923106	32	703	261	106	FALSE	FALSE	FALSE	105	1.67	TRUE	0.414	0.586	TRUE
chrII_454753_T_C_-	YBR107C_chrII_454753_T_C_72_2	0.385515	-1.38291	1.85498	0.0814143	0.318599	-4.72095	UpStream	YBR107C	YBR107C	1	TRUE	-	1	73	1	chrII	454753	T	C	TRUE	0	0	1	0	-1	0	0	0.724	4.57814	FALSE	0.129531	0.0923106	32	703	261	106	FALSE	FALSE	FALSE	223	1.67	TRUE	0.276	0.724	TRUE
chrII_458748_T_C_+	YBR110W_5UTR_0_211	-0.0136303	-0.305048	-0.216441	0.830089	0.935698	-7.2489	TSS	YBR110W	YBR110W	1	TRUE	+	3	56	1	chrII	458748	T	C	TRUE	0	0	1	0	-1	0	0	0.786	6.61551	TRUE	0.0804134	0.059016	37	1130	591	288	FALSE	TRUE	FALSE	124	NA	FALSE	0.214	0.214	FALSE
chrII_458800_C_T_+	YBR110W_5UTR_0_121	-0.00908763	-0.300823	-0.15393	0.878682	0.951639	-7.2571	TSS	YBR110W	YBR110W	1	TRUE	+	3	108	2	chrII	458800	C	T	TRUE	0	0	-1	0	1	0	0	0.685	6.61551	TRUE	0.0804134	0.059016	37	1130	591	288	FALSE	TRUE	FALSE	72	NA	FALSE	0.315	0.315	FALSE
chrII_458813_G_C_+	YBR110W_5UTR_0_112	-0.0308242	-0.313989	-0.581097	0.565458	0.806352	-7.11161	TSS	YBR110W	YBR110W	1	TRUE	+	3	121	3	chrII	458813	G	C	TRUE	0	0	1	-1	0	0	0	0.686	6.61551	TRUE	0.0804134	0.059016	37	1130	591	288	FALSE	TRUE	FALSE	59	2.11	TRUE	0.314	0.314	FALSE
chrII_461887_G_C_-	YBR111C_5UTR_0_2	0.0541796	-0.702404	0.358332	0.722571	0.887496	-6.2399	TSS	YBR111C	YBR111C	1	TRUE	-	1	139	1	chrII	461887	G	C	TRUE	0	0	1	-1	0	0	0	0.777	8.2686	FALSE	0.0317156	0.0226407	6	1024	337	119	FALSE	TRUE	FALSE	14	NA	FALSE	0.223	0.223	FALSE
chrII_465103_T_C_+	YBR113W_chrII_465103_T_C_72_2	0.0502227	-0.0418598	0.491402	0.629565	0.867088	-6.558	UpStream	YBR113W	YBR113W	1	TRUE	+	1	73	1	chrII	465103	T	C	TRUE	0	0	1	0	-1	0	0	0.363	1.35142	FALSE	NA	NA	NA	NA	NA	NA	FALSE	FALSE	FALSE	463	NA	FALSE	0.363	0.363	TRUE
chrII_465853_C_T_-	YBR112C_chrII_465853_C_T_72_2	0.067257	-0.537483	0.736645	0.471603	0.780012	-6.61524	UpStream	YBR112C	YBR112C	1	TRUE	-	1	73	1	chrII	465853	C	T	TRUE	0	0	-1	0	1	0	0	0.655	6.21136	FALSE	NA	NA	58	298	126	54	FALSE	TRUE	FALSE	83	2.75	TRUE	0.345	0.655	TRUE
chrII_465979_G_A_-	YBR112C_5UTR_0_2	-0.2024	0.693388	-2.44741	0.0203733	0.143464	-3.78735	TSS	YBR112C	YBR112C	1	TRUE	-	1	111	1	chrII	465979	G	A	TRUE	0	1	0	-1	0	0	0	0.505	6.21136	FALSE	NA	NA	58	298	126	54	FALSE	TRUE	FALSE	209	NA	FALSE	0.495	0.505	TRUE
chrII_466848_A_G_+	YBR114W_chrII_466848_A_G_72_2	-0.909953	-0.963191	-3.27141	0.00460493	0.0633213	-1.92456	UpStream	YBR114W	YBR114W	1	TRUE	+	1	73	1	chrII	466848	A	G	TRUE	0	-1	0	1	0	0	0	0.646	4.88538	FALSE	0.0541819	0.0387515	31	729	127	45	FALSE	FALSE	FALSE	400	5.96	TRUE	0.354	0.646	TRUE
chrII_475703_C_T_-	YBR116C_chrII_475703_C_T_72_2	-0.055727	-0.897188	-0.559389	0.583352	0.838264	-6.6747	UpStream	YBR116C	YBR116C	1	TRUE	-	1	73	1	chrII	475703	C	T	TRUE	0	0	-1	0	1	0	0	0.023	3.18336	FALSE	NA	NA	NA	331	65	24	FALSE	FALSE	FALSE	977	2.26	TRUE	0.023	0.023	TRUE
chrII_476732_C_T_-	YBR117C_chrII_476732_C_T_72_2	-0.0836458	-1.82753	-0.560509	0.582605	0.838264	-6.40135	UpStream	YBR117C	YBR117C	1	TRUE	-	1	73	1	chrII	476732	C	T	TRUE	0	0	-1	0	1	0	0	0.068	3.79205	FALSE	NA	NA	4	525	173	64	FALSE	FALSE	TRUE	295	NA	FALSE	0.068	0.068	TRUE
chrII_477246_T_G_-	YBR117C_chrII_477246_T_G_72_2	-0.0656778	-0.0812218	-0.867724	0.397894	0.729662	-6.33351	UpStream	YBR117C	YBR117C	1	TRUE	-	1	73	1	chrII	477246	T	G	TRUE	0	0	0	1	-1	0	0	0.554	3.79205	FALSE	NA	NA	4	525	173	64	FALSE	FALSE	TRUE	809	2.09	TRUE	0.446	0.554	TRUE
chrII_477249_T_C_+	YBR118W_chrII_477249_T_C_72_2	0.0471091	2.66492	0.752811	0.462088	0.7717	-6.5582	UpStream	YBR118W	YBR118W	1	TRUE	+	1	73	1	chrII	477249	T	C	TRUE	0	0	1	0	-1	0	0	0.618	8.66062	FALSE	NA	NA	105	1207	427	169	FALSE	FALSE	TRUE	422	2.09	TRUE	0.382	0.382	FALSE
chrII_477272_C_T_+	YBR118W_chrII_477272_C_T_72_2	0.0931842	2.67542	1.5443	0.141331	0.436797	-5.73794	UpStream	YBR118W	YBR118W	1	TRUE	+	1	73	1	chrII	477272	C	T	TRUE	0	0	-1	0	1	0	0	0.002967	8.66062	FALSE	NA	NA	105	1207	427	169	FALSE	FALSE	TRUE	399	2.09	TRUE	0.002967	0.002967	TRUE
chrII_477273_C_T_+	YBR118W_chrII_477273_C_T_72_2	0.0470579	2.62641	0.721059	0.480887	0.786635	-6.59145	UpStream	YBR118W	YBR118W	1	TRUE	+	1	73	1	chrII	477273	C	T	TRUE	0	0	-1	0	1	0	0	0.002967	8.66062	FALSE	NA	NA	105	1207	427	169	FALSE	FALSE	TRUE	398	2.09	TRUE	0.002967	0.002967	TRUE
chrII_479153_AG_A_+	YBR119W_5UTR_0_2111	0.0122523	0.568606	0.232506	0.817703	0.929726	-7.30092	TSS	YBR119W	YBR119W	1	TRUE	+	4	8	1	chrII	479153	AG	A	FALSE	-1	0	0	-1	0	0	0	0.832	5.15099	FALSE	NA	NA	78	612	194	92	FALSE	FALSE	FALSE	185	1.2	TRUE	0.168	NA	NA
chrII_479201_G_A_+	YBR119W_5UTR_0_1211	-0.414221	0.356007	-8.15226	3.82286e-09	4.1437e-07	10.7345	TSS	YBR119W	YBR119W	1	TRUE	+	4	56	2	chrII	479201	G	A	TRUE	0	1	0	-1	0	0	0	0.993	5.15099	FALSE	NA	NA	78	612	194	92	FALSE	FALSE	FALSE	137	0.5	TRUE	0.007	0.007	FALSE
chrII_479267_C_T_+	YBR119W_5UTR_0_1121	0.110022	0.620068	2.00828	0.0535675	0.247078	-5.33088	TSS	YBR119W	YBR119W	1	TRUE	+	4	122	3	chrII	479267	C	T	TRUE	0	0	-1	0	1	0	0	0.546	5.15099	FALSE	NA	NA	78	612	194	92	FALSE	FALSE	FALSE	71	0.5	TRUE	0.454	0.546	TRUE
chrII_479272_CAA_CA_+	YBR119W_5UTR_0_1112	-0.00575365	0.562033	-0.120949	0.904527	0.963814	-7.41626	TSS	YBR119W	YBR119W	1	TRUE	+	4	127	4	chrII	479272	CAA	CA	FALSE	-1	-1	0	0	0	0	0	0.363	5.15099	FALSE	NA	NA	78	612	194	92	FALSE	FALSE	FALSE	66	0.5	TRUE	0.363	NA	NA
chrII_481140_T_C_-	YBR120C_5UTR_0_21	-0.0559031	-0.386337	-1.15459	0.257251	0.557684	-6.75517	TSS	YBR120C	YBR120C	1	TRUE	-	2	11	1	chrII	481140	T	C	TRUE	0	0	1	0	-1	0	0	0.728	5.83263	FALSE	NA	NA	11	679	147	61	FALSE	FALSE	FALSE	217	NA	FALSE	0.272	NA	NA
chrII_481146_T_C_-	YBR120C_5UTR_0_12	0.0454898	-0.33554	0.758358	0.454075	0.724943	-7.13124	TSS	YBR120C	YBR120C	1	TRUE	-	2	5	2	chrII	481146	T	C	TRUE	0	0	1	0	-1	0	1	0.232	5.83263	FALSE	NA	NA	11	679	147	61	FALSE	FALSE	FALSE	223	NA	FALSE	0.232	NA	NA
chrII_483628_A_T_-	YBR121C_chrII_483628_A_T_72_2	-0.0213401	1.04105	-0.236712	0.815771	0.938221	-6.61751	UpStream	YBR121C	YBR121C	1	TRUE	-	1	73	1	chrII	483628	A	T	TRUE	0	-1	0	0	1	0	0	0.0009891	8.50676	TRUE	0.0373772	0.0190224	24	1127	334	105	FALSE	TRUE	TRUE	261	1.02	TRUE	0.0009891	0.0009891	TRUE
chrII_483785_A_G_-	YBR121C_chrII_483785_A_G_72_2	0.0995512	-2.03848	1.19389	0.249273	0.584989	-6.09935	UpStream	YBR121C	YBR121C	1	TRUE	-	1	73	1	chrII	483785	A	G	TRUE	0	-1	0	1	0	0	0	0.947	8.50676	TRUE	0.0373772	0.0190224	24	1127	334	105	FALSE	TRUE	TRUE	418	2.35	TRUE	0.053	0.947	TRUE
chrII_483944_A_G_-	YBR121C_chrII_483944_A_G_72_2	-0.0386588	-0.660229	-0.313544	0.757766	0.922026	-6.76921	UpStream	YBR121C	YBR121C	1	TRUE	-	1	73	1	chrII	483944	A	G	TRUE	0	-1	0	1	0	0	0	0.962	8.50676	TRUE	0.0373772	0.0190224	24	1127	334	105	FALSE	TRUE	TRUE	577	0.89	TRUE	0.038	0.038	FALSE
chrII_484651_G_C_-	YBR122C_5UTR_0_1112	-0.456869	0.0745594	-1.24681	0.221986	0.51273	-4.95352	TSS	YBR122C	YBR122C	1	TRUE	-	4	30	4	chrII	484651	G	C	TRUE	0	0	1	-1	0	0	0	0.058	7.17004	FALSE	0.17708	0.12243	23	627	27	10	FALSE	FALSE	FALSE	148	NA	FALSE	0.058	0.058	TRUE
chrII_486404_G_C_+	YBR124W_chrII_486404_G_C_72_2	0.138074	-0.894558	1.0923	0.290273	0.626567	-6.02201	UpStream	YBR124W	YBR124W	1	TRUE	+	1	73	1	chrII	486404	G	C	TRUE	0	0	1	-1	0	0	0	0.507	NA	TRUE	NA	NA	NA	NA	NA	NA	FALSE	FALSE	FALSE	103	3.82	TRUE	0.493	0.507	TRUE
chrII_486871_A_G_-	YBR123C_chrII_486871_A_G_72_2	0.268934	-1.17312	2.06991	0.0543616	0.261791	-4.56285	UpStream	YBR123C	YBR123C	1	TRUE	-	1	73	1	chrII	486871	A	G	TRUE	0	-1	0	1	0	0	0	0.087	5.09136	TRUE	0.0667907	0.0511359	21	1021	368	157	TRUE	FALSE	FALSE	180	NA	FALSE	0.087	0.087	TRUE
chrII_486878_G_A_-	YBR123C_chrII_486878_G_A_72_2	0.0719656	-0.656793	0.998724	0.332239	0.668818	-6.19191	UpStream	YBR123C	YBR123C	1	TRUE	-	1	73	1	chrII	486878	G	A	TRUE	0	1	0	-1	0	0	0	0.981	5.09136	TRUE	0.0667907	0.0511359	21	1021	368	157	TRUE	FALSE	FALSE	187	NA	FALSE	0.019	0.019	FALSE
chrII_486949_C_CTCATATTCATAT_-	YBR123C_chrII_486949_C_CTCATATTCATAT_72_2	-0.294105	-1.54615	-1.98485	0.0639095	0.282069	-4.53753	UpStream	YBR123C	YBR123C	1	TRUE	-	1	69	1	chrII	486949	C	CTCATATTCATAT	FALSE	12	4	2	0	6	0	2	0.387	5.09136	TRUE	0.0667907	0.0511359	21	1021	368	157	TRUE	FALSE	FALSE	258	1.75	TRUE	0.387	NA	NA
chrII_487047_G_A_-	YBR123C_chrII_487047_G_A_72_2	-0.0574337	-0.87087	-0.367667	0.717759	0.908313	-6.24225	UpStream	YBR123C	YBR123C	1	TRUE	-	1	73	1	chrII	487047	G	A	TRUE	0	1	0	-1	0	0	0	0.643	5.09136	TRUE	0.0667907	0.0511359	21	1021	368	157	TRUE	FALSE	FALSE	356	NA	FALSE	0.357	NA	NA
chrII_487048_TA_TAAAA_-	YBR123C_chrII_487048_TA_TAAAA_72_2	-0.0788757	-1.40664	-0.458955	0.652208	0.874241	-6.0703	UpStream	YBR123C	YBR123C	1	TRUE	-	1	73	1	chrII	487048	TA	TAAAA	FALSE	3	3	0	0	0	0	0	0.055	5.09136	TRUE	0.0667907	0.0511359	21	1021	368	157	TRUE	FALSE	FALSE	357	NA	FALSE	0.055	NA	NA
chrII_488875_T_A_-	YBR125C_chrII_488875_T_A_72_2	0.248455	-0.65072	1.27063	0.221348	0.55013	-5.32389	UpStream	YBR125C	YBR125C	1	TRUE	-	1	73	1	chrII	488875	T	A	TRUE	0	1	0	0	-1	0	0	0.665	5.23587	FALSE	0.0446879	0.0311062	13	569	265	119	FALSE	FALSE	FALSE	495	4.13	TRUE	0.335	0.335	FALSE
chrII_490619_A_C_+	YBR126W-B_chrII_490619_A_C_72_2	-0.0762957	0.792429	-0.367246	0.718067	0.908313	-5.92022	UpStream	YBR126W-B	YBR126W-B	1	TRUE	+	1	73	1	chrII	490619	A	C	TRUE	0	-1	1	0	0	0	-1	0.95	7.90735	FALSE	NA	NA	NA	NA	NA	NA	FALSE	FALSE	FALSE	308	NA	FALSE	0.05	0.05	FALSE
chrII_490619_A_C_-	YBR126C_chrII_490619_A_C_72_2	-0.172664	-0.440505	-1.21991	0.239518	0.573648	-6.10915	UpStream	YBR126C	YBR126C	1	TRUE	-	1	73	1	chrII	490619	A	C	TRUE	0	-1	1	0	0	0	-1	0.95	7.81486	FALSE	0.0118111	0.00806748	47	1211	610	279	FALSE	FALSE	FALSE	227	NA	FALSE	0.05	0.05	FALSE
chrII_490686_A_AGGGGCCTTCCGTCCACGGCAC_-	YBR126C_chrII_490686_A_AGGGGCCTTCCGTCCACGGCAC_72_2	0.0783722	1.70517	0.789995	0.44065	0.757992	-6.42942	UpStream	YBR126C	YBR126C	1	TRUE	-	1	64	1	chrII	490686	A	AGGGGCCTTCCGTCCACGGCAC	FALSE	21	2	9	7	3	0	0	0.918	7.81486	FALSE	0.0118111	0.00806748	47	1211	610	279	FALSE	FALSE	FALSE	294	NA	FALSE	0.082	0.082	FALSE
chrII_498500_T_C_-	YBR131C-A_chrII_498500_T_C_72_2	-0.194109	-0.547806	-1.58777	0.131168	0.417508	-5.43465	UpStream	YBR131C-A	YBR131C-A	1	TRUE	-	1	73	1	chrII	498500	T	C	TRUE	0	0	1	0	-1	0	0	0.601	NA	FALSE	NA	NA	NA	NA	NA	NA	FALSE	FALSE	FALSE	761	1.8	TRUE	0.399	0.601	TRUE
chrII_498697_T_C_-	YBR131C-A_chrII_498697_T_C_72_2	0.289695	-0.488391	2.36974	0.0301861	0.189781	-4.15934	UpStream	YBR131C-A	YBR131C-A	1	TRUE	-	1	73	1	chrII	498697	T	C	TRUE	0	0	1	0	-1	0	0	0.979	NA	FALSE	NA	NA	NA	NA	NA	NA	FALSE	FALSE	FALSE	958	4.31	TRUE	0.021	0.021	FALSE
chrII_503310_G_C_+	YBR134W_chrII_503310_G_C_72_2	-0.100761	-0.907501	-0.70395	0.491204	0.791015	-6.28147	UpStream	YBR134W	YBR134W	1	TRUE	+	1	73	1	chrII	503310	G	C	TRUE	0	0	1	-1	0	0	0	0.799	NA	FALSE	NA	NA	NA	569	193	79	FALSE	FALSE	FALSE	933	5.15	TRUE	0.201	0.201	FALSE
chrII_504500_A_AG_-	YBR133C_5UTR_0_21	-0.0167258	-0.515629	-0.205786	0.83833	0.938326	-7.03588	TSS	YBR133C	YBR133C	1	TRUE	-	2	91	1	chrII	504500	A	AG	FALSE	1	0	0	1	0	0	0	0.621	5.31355	FALSE	0.103637	0.0741734	18	602	189	84	FALSE	TRUE	FALSE	213	NA	FALSE	0.379	NA	NA
chrII_504587_C_T_-	YBR133C_5UTR_0_12	0.0196436	-0.499683	0.224548	0.823833	0.932961	-7.00916	TSS	YBR133C	YBR133C	1	TRUE	-	2	4	2	chrII	504587	C	T	TRUE	0	0	-1	0	1	0	0	0.783	5.31355	FALSE	0.103637	0.0741734	18	602	189	84	FALSE	TRUE	FALSE	300	NA	FALSE	0.217	0.217	FALSE
chrII_504739_G_A_+	YBR135W_5UTR_0_21	-0.00156342	-0.293076	-0.01772	0.985978	0.994915	-6.75665	TSS	YBR135W	YBR135W	1	TRUE	+	2	124	1	chrII	504739	G	A	TRUE	0	1	0	-1	0	0	-1	0.662	6.67979	TRUE	0.00902671	0.00688621	51	1694	870	436	FALSE	TRUE	FALSE	115	NA	FALSE	0.338	0.662	TRUE
chrII_504741_C_T_+	YBR135W_5UTR_0_12	-0.046762	-0.316579	-0.537455	0.594865	0.825899	-6.64645	TSS	YBR135W	YBR135W	1	TRUE	+	2	126	2	chrII	504741	C	T	TRUE	0	0	-1	0	1	0	0	0.667	6.67979	TRUE	0.00902671	0.00688621	51	1694	870	436	FALSE	TRUE	FALSE	113	NA	FALSE	0.333	0.333	FALSE
chrII_505396_T_A_+	YBR136W_chrII_505396_T_A_72_2	-0.0218251	-0.817669	-0.236958	0.815583	0.938221	-6.66463	UpStream	YBR136W	YBR136W	1	TRUE	+	1	73	1	chrII	505396	T	A	TRUE	0	1	0	0	-1	0	0	0.801	2.66476	TRUE	NA	NA	40	657	305	111	FALSE	TRUE	FALSE	272	NA	FALSE	0.199	0.199	FALSE
chrII_505399_A_T_+	YBR136W_chrII_505399_A_T_72_2	-0.176141	-0.885223	-1.61212	0.12575	0.410203	-5.41051	UpStream	YBR136W	YBR136W	1	TRUE	+	1	73	1	chrII	505399	A	T	TRUE	0	-1	0	0	1	0	0	0.801	2.66476	TRUE	NA	NA	40	657	305	111	FALSE	TRUE	FALSE	269	NA	FALSE	0.199	0.199	FALSE
chrII_505412_CA_CAAA_+	YBR136W_chrII_505412_CA_CAAA_72_2	0.457575	-1.32792	3.35694	0.00383441	0.0547475	-2.08893	UpStream	YBR136W	YBR136W	1	TRUE	+	1	73	1	chrII	505412	CA	CAAA	FALSE	2	2	0	0	0	0	0	0.393	2.66476	TRUE	NA	NA	40	657	305	111	FALSE	TRUE	FALSE	256	2.45	TRUE	0.393	NA	NA
chrII_505431_G_A_+	YBR136W_chrII_505431_G_A_72_2	0.240655	-1.59375	1.88459	0.077085	0.309397	-5.003	UpStream	YBR136W	YBR136W	1	TRUE	+	1	73	1	chrII	505431	G	A	TRUE	0	1	0	-1	0	0	-1	0.722	2.66476	TRUE	NA	NA	40	657	305	111	FALSE	TRUE	FALSE	237	2.45	TRUE	0.278	0.722	TRUE
chrII_505510_TCC_T_+	YBR136W_chrII_505510_TCC_T_72_2	0.0799029	-1.05795	0.735524	0.472267	0.780533	-6.21366	UpStream	YBR136W	YBR136W	1	TRUE	+	1	72	1	chrII	505510	TCC	T	FALSE	-2	0	-2	0	0	0	0	0.584	2.66476	TRUE	NA	NA	40	657	305	111	FALSE	TRUE	FALSE	158	2.45	TRUE	0.416	0.584	TRUE
chrII_512880_T_C_+	YBR137W_5UTR_0_2	-0.0676709	-0.35881	-1.10586	0.277459	0.574312	-6.54837	TSS	YBR137W	YBR137W	1	TRUE	+	1	43	1	chrII	512880	T	C	TRUE	0	0	1	0	-1	0	0	0.559	6.72469	FALSE	0.056747	0.0421138	12	553	149	56	FALSE	FALSE	FALSE	164	NA	FALSE	0.441	0.559	TRUE
chrII_528069_T_C_-	YBR141C_5UTR_0_21	-0.188197	0.0509759	-2.68067	0.0117557	0.100401	-3.82363	TSS	YBR141C	YBR141C	1	TRUE	-	2	125	1	chrII	528069	T	C	TRUE	0	0	1	0	-1	0	0	0.84	4.93398	FALSE	NA	NA	4	1000	384	123	FALSE	FALSE	FALSE	31	3	TRUE	0.16	0.16	FALSE
chrII_528108_T_C_-	YBR141C_5UTR_0_12	-0.0107162	0.138342	-0.188217	0.851957	0.941458	-7.14547	TSS	YBR141C	YBR141C	1	TRUE	-	2	86	2	chrII	528108	T	C	TRUE	0	0	1	0	-1	0	0	0.817	4.93398	FALSE	NA	NA	4	1000	384	123	FALSE	FALSE	FALSE	70	NA	FALSE	0.183	0.183	FALSE
chrII_532216_C_T_-	YBR143C_5UTR_0_21	-0.0339647	1.39152	-0.322416	0.749344	0.897179	-6.34512	TSS	YBR143C	YBR143C	1	TRUE	-	2	139	1	chrII	532216	C	T	TRUE	0	0	-1	0	1	0	0	0.629	8.77131	TRUE	0.0113471	0.00679317	51	381	140	47	FALSE	TRUE	FALSE	34	1.69	TRUE	0.371	0.629	TRUE
chrII_532340_G_GA_-	YBR143C_chrII_532340_G_GA_72_2	0.217732	0.185261	1.22636	0.237144	0.57101	-5.35761	UpStream	YBR143C	YBR143C	1	TRUE	-	1	73	1	chrII	532340	G	GA	FALSE	1	1	0	0	0	0	0	0.61	8.77131	TRUE	0.0113471	0.00679317	51	381	140	47	FALSE	TRUE	FALSE	158	3.43	TRUE	0.39	NA	NA
chrII_532411_GA_G_-	YBR143C_chrII_532411_GA_G_72_2	-0.0116143	1.18848	-0.159319	0.875337	0.956749	-6.75783	UpStream	YBR143C	YBR143C	1	TRUE	-	1	74	1	chrII	532411	GA	G	FALSE	-1	-1	0	0	0	0	0	0.895	8.77131	TRUE	0.0113471	0.00679317	51	381	140	47	FALSE	TRUE	FALSE	229	3.43	TRUE	0.105	0.105	FALSE
chrII_532452_T_C_-	YBR143C_chrII_532452_T_C_72_2	-0.0604356	-0.874233	-0.449839	0.658635	0.877067	-6.81112	UpStream	YBR143C	YBR143C	1	TRUE	-	1	73	1	chrII	532452	T	C	TRUE	0	0	1	0	-1	0	0	0.628	8.77131	TRUE	0.0113471	0.00679317	51	381	140	47	FALSE	TRUE	FALSE	270	2.86	TRUE	0.372	0.628	TRUE
chrII_532473_C_T_-	YBR143C_chrII_532473_C_T_72_2	-0.190182	-1.50695	-1.67884	0.111871	0.385766	-5.28493	UpStream	YBR143C	YBR143C	1	TRUE	-	1	73	1	chrII	532473	C	T	TRUE	0	0	-1	0	1	0	0	0.93	8.77131	TRUE	0.0113471	0.00679317	51	381	140	47	FALSE	TRUE	FALSE	291	2.86	TRUE	0.07	0.07	FALSE
chrII_532578_C_T_-	YBR143C_chrII_532578_C_T_72_2	-0.0198738	-1.6164	-0.222554	0.826593	0.943963	-6.71863	UpStream	YBR143C	YBR143C	1	TRUE	-	1	73	1	chrII	532578	C	T	TRUE	0	0	-1	0	1	0	0	0.612	8.77131	TRUE	0.0113471	0.00679317	51	381	140	47	FALSE	TRUE	FALSE	396	NA	FALSE	0.388	0.612	TRUE
chrII_532597_T_C_-	YBR143C_chrII_532597_T_C_72_2	-0.114026	-0.996655	-0.657927	0.519589	0.80519	-6.38496	UpStream	YBR143C	YBR143C	1	TRUE	-	1	73	1	chrII	532597	T	C	TRUE	0	0	1	0	-1	0	0	0.958	8.77131	TRUE	0.0113471	0.00679317	51	381	140	47	FALSE	TRUE	FALSE	415	NA	FALSE	0.042	0.042	FALSE
chrII_532609_T_C_-	YBR143C_chrII_532609_T_C_72_2	-0.025186	-0.644167	-0.199158	0.844554	0.950251	-6.80884	UpStream	YBR143C	YBR143C	1	TRUE	-	1	73	1	chrII	532609	T	C	TRUE	0	0	1	0	-1	0	0	0.627	8.77131	TRUE	0.0113471	0.00679317	51	381	140	47	FALSE	TRUE	FALSE	427	3.6	TRUE	0.373	0.627	TRUE
chrII_532643_G_A_-	YBR143C_chrII_532643_G_A_72_2	0.0801306	-0.974959	0.772783	0.450495	0.763384	-6.57635	UpStream	YBR143C	YBR143C	1	TRUE	-	1	73	1	chrII	532643	G	A	TRUE	0	1	0	-1	0	0	0	0.876	8.77131	TRUE	0.0113471	0.00679317	51	381	140	47	FALSE	TRUE	FALSE	461	3.6	TRUE	0.124	0.124	FALSE
chrII_532654_G_A_-	YBR143C_chrII_532654_G_A_72_2	-0.0734018	-0.688534	-0.51614	0.612551	0.85761	-6.39472	UpStream	YBR143C	YBR143C	1	TRUE	-	1	73	1	chrII	532654	G	A	TRUE	0	1	0	-1	0	0	0	0.629	8.77131	TRUE	0.0113471	0.00679317	51	381	140	47	FALSE	TRUE	FALSE	472	3.6	TRUE	0.371	0.629	TRUE
chrII_532658_A_G_-	YBR143C_chrII_532658_A_G_72_2	0.0375296	-1.00538	0.34152	0.736989	0.914071	-6.81156	UpStream	YBR143C	YBR143C	1	TRUE	-	1	73	1	chrII	532658	A	G	TRUE	0	-1	0	1	0	0	0	0.941	8.77131	TRUE	0.0113471	0.00679317	51	381	140	47	FALSE	TRUE	FALSE	476	3.6	TRUE	0.059	0.059	FALSE
chrII_532659_A_G_-	YBR143C_chrII_532659_A_G_72_2	-0.00500689	-0.937148	-0.0418185	0.967141	0.988373	-6.83018	UpStream	YBR143C	YBR143C	1	TRUE	-	1	73	1	chrII	532659	A	G	TRUE	0	-1	0	1	0	0	0	0.957	8.77131	TRUE	0.0113471	0.00679317	51	381	140	47	FALSE	TRUE	FALSE	477	3.6	TRUE	0.043	0.043	FALSE
chrII_532705_A_T_-	YBR143C_chrII_532705_A_T_72_2	0.488752	-1.08007	3.83996	0.00135855	0.0266185	-1.29648	UpStream	YBR143C	YBR143C	1	TRUE	-	1	73	1	chrII	532705	A	T	TRUE	0	-1	0	0	1	0	0	0.797	8.77131	TRUE	0.0113471	0.00679317	51	381	140	47	FALSE	TRUE	FALSE	523	3.6	TRUE	0.203	0.797	TRUE
chrII_532782_G_A_-	YBR143C_chrII_532782_G_A_72_2	-0.0693678	-0.644225	-0.859354	0.402363	0.733724	-6.54888	UpStream	YBR143C	YBR143C	1	TRUE	-	1	73	1	chrII	532782	G	A	TRUE	0	1	0	-1	0	0	0	0.629	8.77131	TRUE	0.0113471	0.00679317	51	381	140	47	FALSE	TRUE	FALSE	600	NA	FALSE	0.371	0.629	TRUE
chrII_532827_T_G_-	YBR143C_chrII_532827_T_G_72_2	-0.0443843	-0.698267	-0.498314	0.624788	0.864146	-6.646	UpStream	YBR143C	YBR143C	1	TRUE	-	1	73	1	chrII	532827	T	G	TRUE	0	0	0	1	-1	0	-1	0.878	8.77131	TRUE	0.0113471	0.00679317	51	381	140	47	FALSE	TRUE	FALSE	645	NA	FALSE	0.122	0.122	FALSE
chrII_532850_C_T_-	YBR143C_chrII_532850_C_T_72_2	-0.144334	-0.5821	-1.26547	0.223147	0.551607	-5.97081	UpStream	YBR143C	YBR143C	1	TRUE	-	1	73	1	chrII	532850	C	T	TRUE	0	0	-1	0	1	0	0	0.825	8.77131	TRUE	0.0113471	0.00679317	51	381	140	47	FALSE	TRUE	FALSE	668	0.91	TRUE	0.175	0.825	TRUE
chrII_532864_A_C_-	YBR143C_chrII_532864_A_C_72_2	-0.0066884	-0.618007	-0.0750811	0.941046	0.981038	-6.9265	UpStream	YBR143C	YBR143C	1	TRUE	-	1	73	1	chrII	532864	A	C	TRUE	0	-1	1	0	0	0	1	0.82	8.77131	TRUE	0.0113471	0.00679317	51	381	140	47	FALSE	TRUE	FALSE	682	0.91	TRUE	0.18	0.82	TRUE
chrII_532899_T_C_-	YBR143C_chrII_532899_T_C_72_2	-0.00155172	-0.507715	-0.0180896	0.985783	0.994057	-6.88298	UpStream	YBR143C	YBR143C	1	TRUE	-	1	73	1	chrII	532899	T	C	TRUE	0	0	1	0	-1	0	0	0.773	8.77131	TRUE	0.0113471	0.00679317	51	381	140	47	FALSE	TRUE	FALSE	717	0.91	TRUE	0.227	0.773	TRUE
chrII_532929_G_A_-	YBR143C_chrII_532929_G_A_72_2	0.00859081	-0.889116	0.0769287	0.939598	0.981038	-6.79683	UpStream	YBR143C	YBR143C	1	TRUE	-	1	73	1	chrII	532929	G	A	TRUE	0	1	0	-1	0	0	1	0.883	8.77131	TRUE	0.0113471	0.00679317	51	381	140	47	FALSE	TRUE	FALSE	747	0.91	TRUE	0.117	0.117	FALSE
chrII_533002_A_G_-	YBR143C_chrII_533002_A_G_72_2	0.509837	-1.62551	4.6361	0.000249379	0.00738063	0.527966	UpStream	YBR143C	YBR143C	1	TRUE	-	1	73	1	chrII	533002	A	G	TRUE	0	-1	0	1	0	0	0	0.927	8.77131	TRUE	0.0113471	0.00679317	51	381	140	47	FALSE	TRUE	FALSE	820	2.13	TRUE	0.073	0.073	FALSE
chrII_533095_A_C_-	YBR143C_chrII_533095_A_C_72_2	0.686809	-0.934502	4.64305	0.000245767	0.00732222	0.602299	UpStream	YBR143C	YBR143C	1	TRUE	-	1	73	1	chrII	533095	A	C	TRUE	0	-1	1	0	0	0	0	0.692	8.77131	TRUE	0.0113471	0.00679317	51	381	140	47	FALSE	TRUE	FALSE	913	2.13	TRUE	0.308	0.308	FALSE
chrII_533102_G_A_-	YBR143C_chrII_533102_G_A_72_2	-0.101745	-1.55153	-1.08471	0.293524	0.629447	-6.10031	UpStream	YBR143C	YBR143C	1	TRUE	-	1	73	1	chrII	533102	G	A	TRUE	0	1	0	-1	0	0	0	0.693	8.77131	TRUE	0.0113471	0.00679317	51	381	140	47	FALSE	TRUE	FALSE	920	2.13	TRUE	0.307	0.307	FALSE
chrII_533146_G_A_-	YBR143C_chrII_533146_G_A_72_2	-0.0364293	-0.834676	-0.357956	0.724879	0.909968	-6.5517	UpStream	YBR143C	YBR143C	1	TRUE	-	1	73	1	chrII	533146	G	A	TRUE	0	1	0	-1	0	0	0	0.651	8.77131	TRUE	0.0113471	0.00679317	51	381	140	47	FALSE	TRUE	FALSE	964	NA	FALSE	0.349	0.651	TRUE
chrII_533149_G_GA_-	YBR143C_chrII_533149_G_GA_72_2	-0.0441527	-0.971956	-0.579503	0.570017	0.831399	-6.46828	UpStream	YBR143C	YBR143C	1	TRUE	-	1	73	1	chrII	533149	G	GA	FALSE	1	1	0	0	0	0	0	0.684	8.77131	TRUE	0.0113471	0.00679317	51	381	140	47	FALSE	TRUE	FALSE	967	NA	FALSE	0.316	0.316	FALSE
chrII_533152_G_A_-	YBR143C_chrII_533152_G_A_72_2	0.29484	-0.359714	2.27066	0.0367681	0.213676	-4.21736	UpStream	YBR143C	YBR143C	1	TRUE	-	1	73	1	chrII	533152	G	A	TRUE	0	1	0	-1	0	0	0	0.673	8.77131	TRUE	0.0113471	0.00679317	51	381	140	47	FALSE	TRUE	FALSE	970	2.06	TRUE	0.327	NA	NA
chrII_533657_C_T_+	YBR145W_5UTR_0_2	-0.00732203	-0.0751591	-0.118456	0.906485	0.964526	-6.93193	TSS	YBR145W	YBR145W	1	TRUE	+	1	81	1	chrII	533657	C	T	TRUE	0	0	-1	0	1	0	0	0.856	5.81712	FALSE	0.0437852	0.0309682	3	1030	303	99	FALSE	FALSE	TRUE	105	1.96	TRUE	0.144	0.144	FALSE
chrII_533723_G_A_-	YBR144C_chrII_533723_G_A_72_2	0.529844	-1.71442	3.26084	0.00471016	0.0641759	-2.18147	UpStream	YBR144C	YBR144C	1	TRUE	-	1	73	1	chrII	533723	G	A	TRUE	0	1	0	-1	0	0	0	0.672	NA	FALSE	NA	NA	NA	NA	NA	NA	FALSE	FALSE	FALSE	174	NA	FALSE	0.328	0.328	FALSE
chrII_535096_A_T_+	YBR146W_5UTR_0_21	0.0705719	0.22134	0.904408	0.372889	0.665175	-6.40258	TSS	YBR146W	YBR146W	1	TRUE	+	2	44	1	chrII	535096	A	T	TRUE	0	-1	0	0	1	0	0	0.703	6.84554	FALSE	0.0662339	0.0473339	21	665	124	27	FALSE	TRUE	FALSE	164	NA	FALSE	0.297	0.297	FALSE
chrII_535193_G_A_+	YBR146W_5UTR_0_12	0.129771	0.243261	1.79398	0.0827664	0.308216	-5.42274	TSS	YBR146W	YBR146W	1	TRUE	+	2	141	2	chrII	535193	G	A	TRUE	0	1	0	-1	0	0	0	0.733	6.84554	FALSE	0.0662339	0.0473339	21	665	124	27	FALSE	TRUE	FALSE	67	2.46	TRUE	0.267	0.267	FALSE
chrII_536426_C_A_+	YBR147W_5UTR_0_2	0.00746736	0.113192	0.115679	0.908667	0.964526	-7.07336	TSS	YBR147W	YBR147W	1	TRUE	+	1	109	1	chrII	536426	C	A	TRUE	0	1	-1	0	0	0	0	0.987	6.11874	FALSE	0.144567	0.102339	1	830	290	126	FALSE	TRUE	TRUE	149	1.46	TRUE	0.013	0.013	FALSE
chrII_536475_G_A_+	YBR147W_chrII_536475_G_A_72_2	-0.113109	-1.30663	-1.42313	0.173186	0.483447	-5.78904	UpStream	YBR147W	YBR147W	1	TRUE	+	1	73	1	chrII	536475	G	A	TRUE	0	1	0	-1	0	0	0	0.523	6.11874	FALSE	0.144567	0.102339	1	830	290	126	FALSE	TRUE	TRUE	100	1.46	TRUE	0.477	0.523	TRUE
chrII_539767_T_TA_+	YBR149W_chrII_539767_T_TA_72_2	-0.114228	-1.58628	-0.804025	0.432726	0.752186	-6.30101	UpStream	YBR149W	YBR149W	1	TRUE	+	1	73	1	chrII	539767	T	TA	FALSE	1	1	0	0	0	0	0	0.916	8.58943	FALSE	0.0797547	0.0508239	8	774	143	48	FALSE	FALSE	FALSE	220	NA	FALSE	0.084	NA	NA
chrII_539810_A_T_+	YBR149W_5UTR_0_2111	-0.563091	0.291332	-4.58973	7.2058e-05	0.00237713	1.63237	TSS	YBR149W	YBR149W	1	TRUE	+	4	6	1	chrII	539810	A	T	TRUE	0	-1	0	0	1	0	0	0.986	8.58943	FALSE	0.0797547	0.0508239	8	774	143	48	FALSE	FALSE	FALSE	177	NA	FALSE	0.014	0.014	FALSE
chrII_539825_G_T_+	YBR149W_5UTR_0_1211	0.0608009	0.598513	0.501056	0.61994	0.841112	-6.17179	TSS	YBR149W	YBR149W	1	TRUE	+	4	21	2	chrII	539825	G	T	TRUE	0	0	0	-1	1	0	0	0.987	8.58943	FALSE	0.0797547	0.0508239	8	774	143	48	FALSE	FALSE	FALSE	162	NA	FALSE	0.013	0.013	FALSE
chrII_539861_A_G_+	YBR149W_chrII_539861_A_G_72_2	0.0731018	0.12416	0.580561	0.56932	0.830941	-6.53025	UpStream	YBR149W	YBR149W	1	TRUE	+	1	73	1	chrII	539861	A	G	TRUE	0	-1	0	1	0	0	0	0.951	8.58943	FALSE	0.0797547	0.0508239	8	774	143	48	FALSE	FALSE	FALSE	126	NA	FALSE	0.049	0.049	FALSE
chrII_539908_G_A_+	YBR149W_5UTR_0_1112	-0.073305	0.536652	-0.578306	0.567317	0.806352	-6.00993	TSS	YBR149W	YBR149W	1	TRUE	+	4	104	4	chrII	539908	G	A	TRUE	0	1	0	-1	0	0	0	0.448	8.58943	FALSE	0.0797547	0.0508239	8	774	143	48	FALSE	FALSE	FALSE	79	NA	FALSE	0.448	0.448	TRUE
chrII_544518_A_G_+	YBR151W_chrII_544518_A_G_72_2	0.177176	-1.11351	1.12875	0.275021	0.609708	-5.80809	UpStream	YBR151W	YBR151W	1	TRUE	+	1	73	1	chrII	544518	A	G	TRUE	0	-1	0	1	0	0	0	0.013	7.23767	FALSE	0.0848473	0.0647051	7	503	62	19	FALSE	FALSE	FALSE	510	2.88	TRUE	0.013	0.013	TRUE
chrII_544676_T_A_-	YBR150C_chrII_544676_T_A_72_2	0.173265	-0.295977	1.64021	0.119737	0.401127	-5.19769	UpStream	YBR150C	YBR150C	1	TRUE	-	1	73	1	chrII	544676	T	A	TRUE	0	1	0	0	-1	0	0	0.623	3.73226	FALSE	NA	NA	10	844	183	47	TRUE	FALSE	TRUE	183	NA	FALSE	0.377	0.623	TRUE
chrII_544773_G_A_+	YBR151W_5UTR_0_2	-0.145296	-1.12366	-0.990525	0.329735	0.628736	-5.81725	TSS	YBR151W	YBR151W	1	TRUE	+	1	36	1	chrII	544773	G	A	TRUE	0	1	0	-1	0	0	0	0.621	7.23767	FALSE	0.0848473	0.0647051	7	503	62	19	FALSE	FALSE	FALSE	255	NA	FALSE	0.379	0.621	TRUE
chrII_544904_C_G_-	YBR150C_chrII_544904_C_G_72_2	0.138312	-0.86998	1.59074	0.130496	0.417364	-5.63856	UpStream	YBR150C	YBR150C	1	TRUE	-	1	73	1	chrII	544904	C	G	TRUE	0	0	-1	1	0	0	0	0.438	3.73226	FALSE	NA	NA	10	844	183	47	TRUE	FALSE	TRUE	411	0.84	TRUE	0.438	0.438	TRUE
chrII_544912_A_G_-	YBR150C_chrII_544912_A_G_72_2	0.328944	-0.796558	2.78893	0.012787	0.115212	-3.35427	UpStream	YBR150C	YBR150C	1	TRUE	-	1	73	1	chrII	544912	A	G	TRUE	0	-1	0	1	0	0	0	0.44	3.73226	FALSE	NA	NA	10	844	183	47	TRUE	FALSE	TRUE	419	0.84	TRUE	0.44	0.44	TRUE
chrII_544962_C_T_-	YBR150C_chrII_544962_C_T_72_2	-0.185749	-0.738333	-2.02185	0.0595843	0.273698	-4.88621	UpStream	YBR150C	YBR150C	1	TRUE	-	1	73	1	chrII	544962	C	T	TRUE	0	0	-1	0	1	0	0	0.372	3.73226	FALSE	NA	NA	10	844	183	47	TRUE	FALSE	TRUE	469	1.97	TRUE	0.372	0.372	TRUE
chrII_544991_C_T_-	YBR150C_chrII_544991_C_T_72_2	-0.0164492	-1.12798	-0.130856	0.897459	0.966409	-6.64406	UpStream	YBR150C	YBR150C	1	TRUE	-	1	73	1	chrII	544991	C	T	TRUE	0	0	-1	0	1	0	0	0.66	3.73226	FALSE	NA	NA	10	844	183	47	TRUE	FALSE	TRUE	498	1.97	TRUE	0.34	NA	NA
chrII_545985_G_A_+	YBR152W_chrII_545985_G_A_72_2	0.499599	0.335477	6.07609	1.35768e-05	0.000919315	3.29074	UpStream	YBR152W	YBR152W	1	TRUE	+	1	73	1	chrII	545985	G	A	TRUE	0	1	0	-1	0	0	0	0.716	4.37975	TRUE	NA	NA	27	926	177	68	FALSE	FALSE	FALSE	391	NA	FALSE	0.284	0.284	FALSE
chrII_545996_A_C_+	YBR152W_chrII_545996_A_C_72_2	0.0336468	0.00994179	0.446447	0.661033	0.879475	-6.72527	UpStream	YBR152W	YBR152W	1	TRUE	+	1	73	1	chrII	545996	A	C	TRUE	0	-1	1	0	0	0	0	0.59	4.37975	TRUE	NA	NA	27	926	177	68	FALSE	FALSE	FALSE	380	NA	FALSE	0.41	0.59	TRUE
chrII_546010_C_T_+	YBR152W_chrII_546010_C_T_72_2	0.172529	-0.04119	1.64794	0.118126	0.397409	-5.38176	UpStream	YBR152W	YBR152W	1	TRUE	+	1	73	1	chrII	546010	C	T	TRUE	0	0	-1	0	1	0	0	0.657	4.37975	TRUE	NA	NA	27	926	177	68	FALSE	FALSE	FALSE	366	NA	FALSE	0.343	0.657	TRUE
chrII_546015_A_C_+	YBR152W_chrII_546015_A_C_72_2	-0.0663763	-0.861259	-0.80745	0.430805	0.7503	-6.49588	UpStream	YBR152W	YBR152W	1	TRUE	+	1	73	1	chrII	546015	A	C	TRUE	0	-1	1	0	0	0	0	0.965	4.37975	TRUE	NA	NA	27	926	177	68	FALSE	FALSE	FALSE	361	4.1	TRUE	0.035	0.035	FALSE
chrII_546118_C_A_+	YBR152W_chrII_546118_C_A_72_2	-0.021207	-1.32508	-0.140387	0.890041	0.963564	-6.5013	UpStream	YBR152W	YBR152W	1	TRUE	+	1	73	1	chrII	546118	C	A	TRUE	0	1	-1	0	0	0	0	0.625	4.37975	TRUE	NA	NA	27	926	177	68	FALSE	FALSE	FALSE	258	4.1	TRUE	0.375	0.625	TRUE
chrII_546124_T_C_+	YBR152W_chrII_546124_T_C_72_2	-0.501764	-0.675734	-3.00562	0.00810755	0.0887154	-2.5805	UpStream	YBR152W	YBR152W	1	TRUE	+	1	73	1	chrII	546124	T	C	TRUE	0	0	1	0	-1	0	0	0.764	4.37975	TRUE	NA	NA	27	926	177	68	FALSE	FALSE	FALSE	252	4.1	TRUE	0.236	0.236	FALSE
chrII_546130_CT_C_+	YBR152W_chrII_546130_CT_C_72_2	-0.0208306	-0.132081	-0.162511	0.872862	0.956036	-6.26103	UpStream	YBR152W	YBR152W	1	TRUE	+	1	72	1	chrII	546130	CT	C	FALSE	-1	0	0	0	-1	0	0	0.759	4.37975	TRUE	NA	NA	27	926	177	68	FALSE	FALSE	FALSE	246	4.1	TRUE	0.241	0.759	TRUE
chrII_546140_A_T_+	YBR152W_chrII_546140_A_T_72_2	-0.00600511	0.102907	-0.0372537	0.970726	0.989798	-6.25268	UpStream	YBR152W	YBR152W	1	TRUE	+	1	73	1	chrII	546140	A	T	TRUE	0	-1	0	0	1	0	-1	0.761	4.37975	TRUE	NA	NA	27	926	177	68	FALSE	FALSE	FALSE	236	4.1	TRUE	0.239	0.239	FALSE
chrII_546224_T_C_+	YBR152W_chrII_546224_T_C_72_2	0.075921	0.105215	0.343504	0.735524	0.914071	-6.11643	UpStream	YBR152W	YBR152W	1	TRUE	+	1	73	1	chrII	546224	T	C	TRUE	0	0	1	0	-1	0	0	0.818	4.37975	TRUE	NA	NA	27	926	177	68	FALSE	FALSE	FALSE	152	NA	FALSE	0.182	0.182	FALSE
chrII_549229_G_A_-	YBR154C_chrII_549229_G_A_72_2	0.0343546	0.865756	0.434927	0.669206	0.884144	-6.55553	UpStream	YBR154C	YBR154C	1	TRUE	-	1	73	1	chrII	549229	G	A	TRUE	0	1	0	-1	0	0	0	0.68	8.14761	TRUE	0.0157504	0.00877502	86	1134	446	198	FALSE	TRUE	FALSE	220	NA	FALSE	0.32	0.32	FALSE
chrII_549466_C_A_-	YBR154C_chrII_549466_C_A_72_2	-0.0925001	-1.26744	-0.705421	0.490312	0.790477	-6.50445	UpStream	YBR154C	YBR154C	1	TRUE	-	1	73	1	chrII	549466	C	A	TRUE	0	1	-1	0	0	0	0	0.751	8.14761	TRUE	0.0157504	0.00877502	86	1134	446	198	FALSE	TRUE	FALSE	457	4.73	TRUE	0.249	0.249	FALSE
chrII_549576_A_G_+	YBR155W_chrII_549576_A_G_72_2	0.0103513	0.694537	0.161187	0.873888	0.956036	-6.78301	UpStream	YBR155W	YBR155W	1	TRUE	+	1	73	1	chrII	549576	A	G	TRUE	0	-1	0	1	0	0	0	0.741	5.98555	TRUE	0.0670562	0.0493712	31	NA	NA	NA	FALSE	TRUE	FALSE	195	4.36	TRUE	0.259	0.259	FALSE
chrII_549616_TG_T_+	YBR155W_5UTR_0_12	0.160157	-0.252562	1.54535	0.132607	0.396496	-5.51572	TSS	YBR155W	YBR155W	1	TRUE	+	2	66	2	chrII	549616	TG	T	FALSE	-1	0	0	-1	0	0	0	0.573	5.98555	TRUE	0.0670562	0.0493712	31	NA	NA	NA	FALSE	TRUE	FALSE	155	4.36	TRUE	0.427	0.573	TRUE
chrII_549616_TG_T_-	YBR154C_chrII_549616_TG_T_72_2	-0.0350989	-0.39777	-0.235814	0.816456	0.938221	-6.3773	UpStream	YBR154C	YBR154C	1	TRUE	-	1	74	1	chrII	549616	TG	T	FALSE	-1	0	0	-1	0	0	0	0.573	8.14761	TRUE	0.0157504	0.00877502	86	1134	446	198	FALSE	TRUE	FALSE	607	4.36	TRUE	0.427	0.573	TRUE
chrII_549769_G_A_-	YBR154C_chrII_549769_G_A_72_2	0.159163	-0.526956	0.953767	0.35386	0.687603	-5.99526	UpStream	YBR154C	YBR154C	1	TRUE	-	1	73	1	chrII	549769	G	A	TRUE	0	1	0	-1	0	0	0	0.81	8.14761	TRUE	0.0157504	0.00877502	86	1134	446	198	FALSE	TRUE	FALSE	760	2.47	TRUE	0.19	0.19	FALSE
chrII_553255_C_T_-	YBR156C_5UTR_0_2	0.169403	0.507329	2.50194	0.0179531	0.131224	-3.93985	TSS	YBR156C	YBR156C	1	TRUE	-	1	127	1	chrII	553255	C	T	TRUE	0	0	-1	0	1	0	0	0.643	4.11832	FALSE	0.120501	0.0971116	32	1274	555	268	FALSE	FALSE	FALSE	55	2.36	TRUE	0.357	0.357	FALSE
chrII_555562_G_A_+	YBR158W_chrII_555562_G_A_72_2	-0.208306	-0.530738	-1.29824	0.211919	0.539026	-5.62166	UpStream	YBR158W	YBR158W	1	TRUE	+	1	73	1	chrII	555562	G	A	TRUE	0	1	0	-1	0	0	0	0.705	7.60941	FALSE	0.103867	0.0772083	9	482	110	28	FALSE	FALSE	FALSE	987	NA	FALSE	0.295	0.295	FALSE
chrII_555566_CT_C_+	YBR158W_chrII_555566_CT_C_72_2	0.0941963	-0.489193	1.02714	0.319065	0.658311	-6.21499	UpStream	YBR158W	YBR158W	1	TRUE	+	1	72	1	chrII	555566	CT	C	FALSE	-1	0	0	0	-1	0	0	0.69	7.60941	FALSE	0.103867	0.0772083	9	482	110	28	FALSE	FALSE	FALSE	983	NA	FALSE	0.31	0.69	TRUE
chrII_555569_A_G_+	YBR158W_chrII_555569_A_G_72_2	0.220631	-0.513637	1.62757	0.122412	0.405029	-5.25988	UpStream	YBR158W	YBR158W	1	TRUE	+	1	73	1	chrII	555569	A	G	TRUE	0	-1	0	1	0	0	0	0.688	7.60941	FALSE	0.103867	0.0772083	9	482	110	28	FALSE	FALSE	FALSE	980	NA	FALSE	0.312	0.688	TRUE
chrII_555623_C_G_+	YBR158W_chrII_555623_C_G_72_2	-0.0617932	-0.455851	-0.621539	0.542672	0.816841	-6.46242	UpStream	YBR158W	YBR158W	1	TRUE	+	1	73	1	chrII	555623	C	G	TRUE	0	0	-1	1	0	0	0	0.689	7.60941	FALSE	0.103867	0.0772083	9	482	110	28	FALSE	FALSE	FALSE	926	NA	FALSE	0.311	0.689	TRUE
chrII_555624_A_G_+	YBR158W_chrII_555624_A_G_72_2	0.122817	-0.354976	0.780267	0.446198	0.759262	-6.18677	UpStream	YBR158W	YBR158W	1	TRUE	+	1	73	1	chrII	555624	A	G	TRUE	0	-1	0	1	0	0	-1	0.65	7.60941	FALSE	0.103867	0.0772083	9	482	110	28	FALSE	FALSE	FALSE	925	NA	FALSE	0.35	0.65	TRUE
chrII_555633_G_T_+	YBR158W_chrII_555633_G_T_72_2	0.292438	-0.00619923	1.96884	0.0658671	0.286064	-4.66087	UpStream	YBR158W	YBR158W	1	TRUE	+	1	73	1	chrII	555633	G	T	TRUE	0	0	0	-1	1	0	-1	0.017	7.60941	FALSE	0.103867	0.0772083	9	482	110	28	FALSE	FALSE	FALSE	916	NA	FALSE	0.017	0.017	TRUE
chrII_555666_T_TC_+	YBR158W_chrII_555666_T_TC_72_2	0.0808783	-0.403954	1.04657	0.31027	0.646431	-6.18877	UpStream	YBR158W	YBR158W	1	TRUE	+	1	73	1	chrII	555666	T	TC	FALSE	1	0	1	0	0	0	0	0.794	7.60941	FALSE	0.103867	0.0772083	9	482	110	28	FALSE	FALSE	FALSE	883	NA	FALSE	0.206	0.206	FALSE
chrII_555819_C_T_+	YBR158W_chrII_555819_C_T_72_2	0.360562	2.71214	2.76365	0.0134793	0.119285	-3.06268	UpStream	YBR158W	YBR158W	1	TRUE	+	1	73	1	chrII	555819	C	T	TRUE	0	0	-1	0	1	0	0	0.731	7.60941	FALSE	0.103867	0.0772083	9	482	110	28	FALSE	FALSE	FALSE	730	1.71	TRUE	0.269	0.269	FALSE
chrII_555881_G_T_+	YBR158W_chrII_555881_G_T_72_2	-1.87992	2.08763	-4.45499	0.000365379	0.00971951	-0.447673	UpStream	YBR158W	YBR158W	1	TRUE	+	1	73	1	chrII	555881	G	T	TRUE	0	0	0	-1	1	0	0	0.726	7.60941	FALSE	0.103867	0.0772083	9	482	110	28	FALSE	FALSE	FALSE	668	NA	FALSE	0.274	0.274	FALSE
chrII_555964_G_A_+	YBR158W_chrII_555964_G_A_72_2	0.301576	0.66484	1.91364	0.073038	0.301913	-4.66309	UpStream	YBR158W	YBR158W	1	TRUE	+	1	73	1	chrII	555964	G	A	TRUE	0	1	0	-1	0	0	-1	0.685	7.60941	FALSE	0.103867	0.0772083	9	482	110	28	FALSE	FALSE	FALSE	585	NA	FALSE	0.315	0.315	FALSE
chrII_558567_T_TC_+	YBR159W_chrII_558567_T_TC_72_2	0.0865403	-0.438646	0.827701	0.419559	0.743145	-6.30822	UpStream	YBR159W	YBR159W	1	TRUE	+	1	73	1	chrII	558567	T	TC	FALSE	1	0	1	0	0	0	0	0.707	7.69638	FALSE	NA	NA	130	NA	NA	NA	FALSE	TRUE	FALSE	118	NA	FALSE	0.293	0.293	FALSE
chrII_558576_T_C_+	YBR159W_5UTR_0_121	-0.256137	0.129418	-1.42877	0.163262	0.443202	-4.97683	TSS	YBR159W	YBR159W	1	TRUE	+	3	89	2	chrII	558576	T	C	TRUE	0	0	1	0	-1	0	0	0.833	7.69638	FALSE	NA	NA	130	NA	NA	NA	FALSE	TRUE	FALSE	109	NA	FALSE	0.167	0.167	FALSE
chrII_558597_A_C_+	YBR159W_5UTR_0_112	-0.453181	0.0477732	-2.45967	0.0198044	0.141095	-3.26999	TSS	YBR159W	YBR159W	1	TRUE	+	3	110	3	chrII	558597	A	C	TRUE	0	-1	1	0	0	0	0	0.707	7.69638	FALSE	NA	NA	130	NA	NA	NA	FALSE	TRUE	FALSE	88	NA	FALSE	0.293	0.707	TRUE
chrII_559922_C_G_+	YBR160W_5UTR_0_21	0.102054	1.3193	0.912236	0.368821	0.662559	-5.78236	TSS	YBR160W	YBR160W	1	TRUE	+	2	67	1	chrII	559922	C	G	TRUE	0	0	-1	1	0	0	0	0.957	6.43473	TRUE	NA	NA	569	2389	1000	480	FALSE	TRUE	FALSE	156	NA	FALSE	0.043	0.043	FALSE
chrII_559960_C_T_+	YBR160W_5UTR_0_12	-0.07761	1.22222	-0.785017	0.438518	0.715923	-6.06045	TSS	YBR160W	YBR160W	1	TRUE	+	2	105	2	chrII	559960	C	T	TRUE	0	0	-1	0	1	0	0	0.668	6.43473	TRUE	NA	NA	569	2389	1000	480	FALSE	TRUE	FALSE	118	NA	FALSE	0.332	0.668	TRUE
chrII_560987_A_G_+	YBR161W_chrII_560987_A_G_72_2	0.200581	-2.07865	1.73303	0.101591	0.362917	-5.29969	UpStream	YBR161W	YBR161W	1	TRUE	+	1	73	1	chrII	560987	A	G	TRUE	0	-1	0	1	0	0	0	0.473	5.59835	FALSE	0.105563	0.0802997	5	1179	418	149	FALSE	FALSE	TRUE	647	2.43	TRUE	0.473	NA	NA
chrII_561291_T_C_+	YBR161W_5UTR_0_2	-0.060577	-0.867	-0.472908	0.639656	0.849981	-6.38911	TSS	YBR161W	YBR161W	1	TRUE	+	1	29	1	chrII	561291	T	C	TRUE	0	0	1	0	-1	0	0	0.645	5.59835	FALSE	0.105563	0.0802997	5	1179	418	149	FALSE	FALSE	TRUE	343	NA	FALSE	0.355	0.645	TRUE
chrII_564636_T_C_+	YBR162W-A_chrII_564636_T_C_72_2	0.190849	-0.875127	1.40395	0.178732	0.491703	-5.47863	UpStream	YBR162W-A	YBR162W-A	1	TRUE	+	1	73	1	chrII	564636	T	C	TRUE	0	0	1	0	-1	0	0	0.752	8.91911	FALSE	0.132798	0.0844714	6	957	190	60	FALSE	FALSE	FALSE	595	4.4	TRUE	0.248	0.248	FALSE
chrII_564639_G_A_+	YBR162W-A_chrII_564639_G_A_72_2	-0.0938474	-0.804167	-0.582812	0.567839	0.830941	-6.09914	UpStream	YBR162W-A	YBR162W-A	1	TRUE	+	1	73	1	chrII	564639	G	A	TRUE	0	1	0	-1	0	0	0	0.744	8.91911	FALSE	0.132798	0.0844714	6	957	190	60	FALSE	FALSE	FALSE	592	4.4	TRUE	0.256	0.256	FALSE
chrII_565153_A_G_+	YBR162W-A_5UTR_0_2	0.806298	0.10722	1.75468	0.0893883	0.321058	-4.2178	TSS	YBR162W-A	YBR162W-A	1	TRUE	+	1	84	1	chrII	565153	A	G	TRUE	0	-1	0	1	0	0	0	0.663	8.91911	FALSE	0.132798	0.0844714	6	957	190	60	FALSE	FALSE	FALSE	78	NA	FALSE	0.337	0.663	TRUE
chrII_565493_C_T_+	YBR163W_5UTR_0_21	0.0157913	-0.782542	0.379627	0.706861	0.882788	-7.49032	TSS	YBR163W	YBR163W	1	TRUE	+	2	17	1	chrII	565493	C	T	TRUE	0	0	-1	0	1	0	0	0.964	5.22424	FALSE	0.142524	0.110143	10	141	40	13	FALSE	FALSE	FALSE	230	NA	FALSE	0.036	0.036	FALSE
chrII_565566_A_G_+	YBR163W_5UTR_0_12	-0.0584258	-0.820822	-1.36275	0.18297	0.466728	-6.67595	TSS	YBR163W	YBR163W	1	TRUE	+	2	90	2	chrII	565566	A	G	TRUE	0	-1	0	1	0	0	0	0.659	5.22424	FALSE	0.142524	0.110143	10	141	40	13	FALSE	FALSE	FALSE	157	NA	FALSE	0.341	0.659	TRUE
chrII_565627_G_A_+	YBR163W_chrII_565627_G_A_72_2	-0.0525167	-0.950799	-0.461432	0.650467	0.874241	-6.71287	UpStream	YBR163W	YBR163W	1	TRUE	+	1	73	1	chrII	565627	G	A	TRUE	0	1	0	-1	0	0	0	0.791	5.22424	FALSE	0.142524	0.110143	10	141	40	13	FALSE	FALSE	FALSE	96	0.22	TRUE	0.209	0.209	FALSE
chrII_568676_G_C_-	YBR164C_5UTR_0_2	0.0235431	-0.371872	0.337985	0.737697	0.894288	-6.87352	TSS	YBR164C	YBR164C	1	TRUE	-	1	14	1	chrII	568676	G	C	TRUE	0	0	1	-1	0	0	0	0.643	7.14424	FALSE	NA	NA	20	1327	522	240	FALSE	TRUE	FALSE	250	2.26	TRUE	0.357	0.643	TRUE
chrII_568676_G_C_+	YBR165W_5UTR_0_2	-1.24196	-0.149751	-2.00362	0.0540921	0.247474	-4.15624	TSS	YBR165W	YBR165W	1	TRUE	+	1	61	1	chrII	568676	G	C	TRUE	0	0	1	-1	0	0	0	0.643	5.58345	FALSE	0.173591	0.122516	2	505	108	28	FALSE	FALSE	FALSE	176	2.26	TRUE	0.357	0.643	TRUE
chrII_571328_CAA_CAAA_-	YBR166C_chrII_571328_CAA_CAAA_72_2	-0.167014	-1.02852	-0.708245	0.488602	0.790336	-5.71808	UpStream	YBR166C	YBR166C	1	TRUE	-	1	73	1	chrII	571328	CAA	CAAA	FALSE	1	1	0	0	0	0	0	0.11	5.81602	FALSE	0.0615915	0.0449713	11	646	193	81	FALSE	FALSE	FALSE	128	NA	FALSE	0.11	NA	NA
chrII_571347_T_A_-	YBR166C_chrII_571347_T_A_72_2	-0.408595	-1.12746	-1.05411	0.306906	0.643273	-5.34948	UpStream	YBR166C	YBR166C	1	TRUE	-	1	73	1	chrII	571347	T	A	TRUE	0	1	0	0	-1	0	0	NA	5.81602	FALSE	0.0615915	0.0449713	11	646	193	81	FALSE	FALSE	FALSE	147	NA	FALSE	NA	NA	NA
chrII_571349_A_G_-	YBR166C_chrII_571349_A_G_72_2	0.500856	-0.5958	1.90005	0.0749069	0.304504	-4.35215	UpStream	YBR166C	YBR166C	1	TRUE	-	1	73	1	chrII	571349	A	G	TRUE	0	-1	0	1	0	0	0	0.686	5.81602	FALSE	0.0615915	0.0449713	11	646	193	81	FALSE	FALSE	FALSE	149	NA	FALSE	0.314	NA	NA
chrII_571362_G_C_-	YBR166C_chrII_571362_G_C_72_2	0.427878	-0.286396	2.19607	0.042578	0.230456	-3.87819	UpStream	YBR166C	YBR166C	1	TRUE	-	1	73	1	chrII	571362	G	C	TRUE	0	0	1	-1	0	0	0	0.006931	5.81602	FALSE	0.0615915	0.0449713	11	646	193	81	FALSE	FALSE	FALSE	162	7.8	TRUE	0.006931	0.006931	TRUE
chrII_571411_A_G_-	YBR166C_chrII_571411_A_G_72_2	-1.18582	-1.03792	-5.55263	3.79877e-05	0.00185958	2.41742	UpStream	YBR166C	YBR166C	1	TRUE	-	1	73	1	chrII	571411	A	G	TRUE	0	-1	0	1	0	0	0	0.964	5.81602	FALSE	0.0615915	0.0449713	11	646	193	81	FALSE	FALSE	FALSE	211	7.8	TRUE	0.036	0.036	FALSE
chrII_578174_A_C_-	YBR170C_5UTR_0_2	-0.0396143	-0.398393	-0.647486	0.522176	0.774003	-6.97514	TSS	YBR170C	YBR170C	1	TRUE	-	1	107	1	chrII	578174	A	C	TRUE	0	-1	1	0	0	0	0	0.705	5.60179	FALSE	0.0851237	0.063128	30	554	379	193	FALSE	TRUE	FALSE	88	NA	FALSE	0.295	NA	NA
chrII_581484_G_C_-	YBR172C_5UTR_0_2111	0.196766	0.23372	0.62237	0.538338	0.785456	-5.53228	TSS	YBR172C	YBR172C	1	TRUE	-	4	144	1	chrII	581484	G	C	TRUE	0	0	1	-1	0	0	0	0.659	6.29504	FALSE	0.199755	0.147052	28	607	123	28	FALSE	FALSE	TRUE	112	3.91	TRUE	0.341	0.659	TRUE
chrII_583100_T_C_-	YBR174C_chrII_583100_T_C_72_2	0.544655	-0.54106	3.58405	0.00235485	0.0389771	-1.76736	UpStream	YBR174C	YBR174C	1	TRUE	-	1	73	1	chrII	583100	T	C	TRUE	0	0	1	0	-1	0	0	0.543	NA	FALSE	NA	NA	NA	NA	NA	NA	FALSE	FALSE	FALSE	448	3.3	TRUE	0.457	0.543	TRUE
chrII_583485_AT_A_-	YBR174C_chrII_583485_AT_A_72_2	0.116599	-1.82268	1.05484	0.30658	0.643273	-6.11937	UpStream	YBR174C	YBR174C	1	TRUE	-	1	74	1	chrII	583485	AT	A	FALSE	-1	0	0	0	-1	0	0	0.793	NA	FALSE	NA	NA	NA	NA	NA	NA	FALSE	FALSE	FALSE	833	5.27	TRUE	0.207	0.793	TRUE
chrII_583485_AT_A_+	YBR176W_5UTR_0_2111	0.0248551	-0.0182774	0.264136	0.793457	0.917738	-6.70488	TSS	YBR176W	YBR176W	1	TRUE	+	4	7	1	chrII	583485	AT	A	FALSE	-1	0	0	0	-1	0	0	0.793	5.13296	FALSE	0.0943543	0.0658926	11	539	72	17	FALSE	FALSE	FALSE	235	5.27	TRUE	0.207	0.793	TRUE
chrII_583514_T_C_+	YBR176W_5UTR_0_1211	-0.10934	-0.082433	-1.06583	0.294889	0.588422	-6.08728	TSS	YBR176W	YBR176W	1	TRUE	+	4	36	2	chrII	583514	T	C	TRUE	0	0	1	0	-1	0	0	0.81	5.13296	FALSE	0.0943543	0.0658926	11	539	72	17	FALSE	FALSE	FALSE	206	5.27	TRUE	0.19	0.19	FALSE
chrII_583527_GTAAGATATCCTAAAAAACTAC_G_+	YBR176W_5UTR_0_1121	-0.232215	-0.149723	-2.94897	0.00608019	0.0640702	-2.91882	TSS	YBR176W	YBR176W	1	TRUE	+	4	49	3	chrII	583527	GTAAGATATCCTAAAAAACTAC	G	FALSE	-21	-11	-4	-1	-5	0	0	0.616	5.13296	FALSE	0.0943543	0.0658926	11	539	72	17	FALSE	FALSE	FALSE	193	5.27	TRUE	0.384	0.616	TRUE
chrII_583527_GTAAGATATCCTAAAAAACTAC_G_-	YBR174C_5UTR_0_112	0.0385789	-0.0882657	0.201448	0.84169	0.939822	-5.94549	TSS	YBR174C	YBR174C	1	TRUE	-	3	28	3	chrII	583527	GTAAGATATCCTAAAAAACTAC	G	FALSE	-21	-11	-4	-1	-5	0	0	0.616	NA	FALSE	NA	NA	NA	NA	NA	NA	FALSE	FALSE	FALSE	875	5.27	TRUE	0.384	0.616	TRUE
chrII_583576_T_A_+	YBR176W_5UTR_0_1112	-0.162278	-0.117537	-1.73814	0.0923054	0.328041	-5.1838	TSS	YBR176W	YBR176W	1	TRUE	+	4	98	4	chrII	583576	T	A	TRUE	0	1	0	0	-1	0	0	0.569	5.13296	FALSE	0.0943543	0.0658926	11	539	72	17	FALSE	FALSE	FALSE	144	5.27	TRUE	0.431	0.569	TRUE
chrII_585569_C_T_+	YBR178W_chrII_585569_C_T_72_2	-0.180425	-0.477523	-0.982566	0.3399	0.67728	-5.77087	UpStream	YBR178W	YBR178W	1	TRUE	+	1	73	1	chrII	585569	C	T	TRUE	0	0	-1	0	1	0	0	0.669	NA	FALSE	NA	NA	NA	367	46	16	FALSE	FALSE	FALSE	502	1.85	TRUE	0.331	0.669	TRUE
chrII_585814_C_T_+	YBR178W_chrII_585814_C_T_72_2	0.108657	-0.490677	0.84418	0.410548	0.738261	-6.22439	UpStream	YBR178W	YBR178W	1	TRUE	+	1	73	1	chrII	585814	C	T	TRUE	0	0	-1	0	1	0	0	0.879	NA	FALSE	NA	NA	NA	367	46	16	FALSE	FALSE	FALSE	257	0.83	TRUE	0.121	0.121	FALSE
chrII_586221_C_T_-	YBR177C_5UTR_0_21	-0.0774637	0.650581	-0.480423	0.634365	0.846844	-6.16318	TSS	YBR177C	YBR177C	1	TRUE	-	2	108	1	chrII	586221	C	T	TRUE	0	0	-1	0	1	0	0	0.81	8.05235	FALSE	0.0822641	0.0582698	34	756	182	85	FALSE	TRUE	TRUE	59	9.06	TRUE	0.19	0.19	FALSE
chrII_586315_G_C_-	YBR177C_chrII_586315_G_C_72_2	-0.257746	0.970372	-2.76569	0.0134222	0.119252	-3.33874	UpStream	YBR177C	YBR177C	1	TRUE	-	1	73	1	chrII	586315	G	C	TRUE	0	0	1	-1	0	0	0	0.59	8.05235	FALSE	0.0822641	0.0582698	34	756	182	85	FALSE	TRUE	TRUE	153	NA	FALSE	0.41	0.59	TRUE
chrII_586331_TAA_TA_-	YBR177C_chrII_586331_TAA_TA_72_2	0.0472587	1.24644	0.382374	0.707027	0.905618	-6.37609	UpStream	YBR177C	YBR177C	1	TRUE	-	1	74	1	chrII	586331	TAA	TA	FALSE	-1	-1	0	0	0	0	0	0.657	8.05235	FALSE	0.0822641	0.0582698	34	756	182	85	FALSE	TRUE	TRUE	169	NA	FALSE	0.343	NA	NA
chrII_589164_T_C_+	YBR180W_chrII_589164_T_C_72_2	0.100669	-0.472995	0.970795	0.345559	0.681155	-6.2577	UpStream	YBR180W	YBR180W	1	TRUE	+	1	73	1	chrII	589164	T	C	TRUE	0	0	1	0	-1	0	0	0.893	NA	FALSE	0.0964053	0.0738048	4	837	111	33	FALSE	FALSE	FALSE	577	2.75	TRUE	0.107	0.893	TRUE
chrII_592815_A_T_-	YBR181C_5UTR_0_211	0.0136345	0.252357	0.138056	0.891107	0.959045	-6.6891	TSS	YBR181C	YBR181C	1	TRUE	-	3	133	1	chrII	592815	A	T	TRUE	0	-1	0	0	1	0	0	0.673	11.2236	FALSE	NA	NA	36	1514	601	238	FALSE	TRUE	TRUE	41	0.76	TRUE	0.327	0.673	TRUE
chrII_592905_C_T_-	YBR181C_5UTR_0_121	-0.114319	0.184857	-1.33951	0.190332	0.474267	-5.76175	TSS	YBR181C	YBR181C	1	TRUE	-	3	43	2	chrII	592905	C	T	TRUE	0	0	-1	0	1	0	0	0.835	11.2236	FALSE	NA	NA	36	1514	601	238	FALSE	TRUE	TRUE	131	NA	FALSE	0.165	0.165	FALSE
chrII_592938_T_C_-	YBR181C_chrII_592938_T_C_72_2	0.0589106	1.34195	0.489618	0.6308	0.867274	-6.42515	UpStream	YBR181C	YBR181C	1	TRUE	-	1	73	1	chrII	592938	T	C	TRUE	0	0	1	0	-1	0	0	0.729	11.2236	FALSE	NA	NA	36	1514	601	238	FALSE	TRUE	TRUE	164	NA	FALSE	0.271	0.271	FALSE
chrII_595808_C_T_-	YBR182C-A_chrII_595808_C_T_72_2	0.0270786	0.847442	0.274003	0.787457	0.93075	-6.75233	UpStream	YBR182C-A	YBR182C-A	1	TRUE	-	1	73	1	chrII	595808	C	T	TRUE	0	0	-1	0	1	0	0	0.674	NA	FALSE	NA	NA	NA	503	67	18	FALSE	FALSE	FALSE	253	NA	FALSE	0.326	0.674	TRUE
chrII_595927_T_C_+	YBR183W_chrII_595927_T_C_72_2	0.00536421	-0.733705	0.055642	0.95629	0.984261	-6.47224	UpStream	YBR183W	YBR183W	1	TRUE	+	1	73	1	chrII	595927	T	C	TRUE	0	0	1	0	-1	0	0	0.972	4.49487	FALSE	0.0670342	0.0491231	36	826	214	62	FALSE	TRUE	TRUE	188	0.28	TRUE	0.028	0.028	FALSE
chrII_596041_T_C_+	YBR183W_chrII_596041_T_C_72_2	-0.344891	-2.38669	-1.77766	0.0937496	0.344247	-4.95099	UpStream	YBR183W	YBR183W	1	TRUE	+	1	73	1	chrII	596041	T	C	TRUE	0	0	1	0	-1	0	0	0.556	4.49487	FALSE	0.0670342	0.0491231	36	826	214	62	FALSE	TRUE	TRUE	74	1.49	TRUE	0.444	0.556	TRUE
chrII_604449_A_G_+	YBR189W_5UTR_0_2	0.227769	0.0380624	1.68695	0.101848	0.34888	-5.16039	TSS	YBR189W	YBR189W	1	TRUE	+	1	112	1	chrII	604449	A	G	TRUE	0	-1	0	1	0	0	0	0.546	11.2996	FALSE	NA	NA	75	696	94	19	FALSE	TRUE	TRUE	59	1.12	TRUE	0.454	0.546	TRUE
chrII_605773_C_T_+	YBR190W_chrII_605773_C_T_72_2	-0.182141	-0.58625	-1.01317	0.325492	0.663037	-5.90343	UpStream	YBR190W	YBR190W	1	TRUE	+	1	73	1	chrII	605773	C	T	TRUE	0	0	-1	0	1	0	0	0.725	2.34882	TRUE	NA	NA	NA	NA	NA	NA	FALSE	FALSE	FALSE	193	1.89	TRUE	0.275	0.275	FALSE
chrII_605775_T_C_+	YBR191W_chrII_605775_T_C_72_2	-0.0313876	-0.617355	-0.218195	0.829932	0.945286	-6.47859	UpStream	YBR191W	YBR191W	1	TRUE	+	1	73	1	chrII	605775	T	C	TRUE	0	0	1	0	-1	0	0	0.812	10.7912	FALSE	NA	NA	26	607	83	32	FALSE	TRUE	TRUE	495	1.89	TRUE	0.188	0.188	FALSE
chrII_609798_G_T_-	YBR193C_5UTR_0_2	0.0545274	0.538408	0.188594	0.851664	0.941458	-5.60281	TSS	YBR193C	YBR193C	1	TRUE	-	1	141	1	chrII	609798	G	T	TRUE	0	0	0	-1	1	0	0	0.7	5.09449	TRUE	0.0872461	0.0636537	42	2190	1056	442	FALSE	FALSE	FALSE	45	NA	FALSE	0.3	0.7	TRUE
chrII_614485_G_C_-	YBR196C-A_chrII_614485_G_C_72_2	0.0395174	0.542814	0.450165	0.658404	0.877021	-6.54184	UpStream	YBR196C-A	YBR196C-A	1	TRUE	-	1	73	1	chrII	614485	G	C	TRUE	0	0	1	-1	0	0	1	0.671	1.03746	FALSE	NA	NA	NA	288	154	72	FALSE	FALSE	FALSE	312	2.12	TRUE	0.329	0.671	TRUE
chrII_615887_A_G_-	YBR197C_5UTR_0_211	0.0769992	0.211205	0.892897	0.378925	0.670185	-6.17491	TSS	YBR197C	YBR197C	1	TRUE	-	3	125	1	chrII	615887	A	G	TRUE	0	-1	0	1	0	0	-1	0.663	4.73852	FALSE	0.291584	0.232801	3	463	62	15	FALSE	FALSE	TRUE	31	1.64	TRUE	0.337	0.663	TRUE
chrII_615970_C_G_-	YBR197C_5UTR_0_121	-0.231119	0.0638428	-2.17657	0.0374056	0.203701	-4.22843	TSS	YBR197C	YBR197C	1	TRUE	-	3	42	2	chrII	615970	C	G	TRUE	0	0	-1	1	0	0	0	0.677	4.73852	FALSE	0.291584	0.232801	3	463	62	15	FALSE	FALSE	TRUE	114	NA	FALSE	0.323	0.677	TRUE
chrII_615984_GA_G_-	YBR197C_5UTR_0_112	-0.139623	0.100279	-1.50013	0.143895	0.41317	-5.50695	TSS	YBR197C	YBR197C	1	TRUE	-	3	28	3	chrII	615984	GA	G	FALSE	-1	-1	0	0	0	0	0	0.69	4.73852	FALSE	0.291584	0.232801	3	463	62	15	FALSE	FALSE	TRUE	128	NA	FALSE	0.31	NA	NA
chrII_618597_T_C_+	YBR199W_chrII_618597_T_C_72_2	0.401234	-0.0787581	5.41666	4.99128e-05	0.00218686	2.04491	UpStream	YBR199W	YBR199W	1	TRUE	+	1	73	1	chrII	618597	T	C	TRUE	0	0	1	0	-1	0	-1	0.732	7.36496	FALSE	0.135961	0.102928	9	536	79	22	FALSE	FALSE	FALSE	312	NA	FALSE	0.268	0.268	FALSE
chrII_618646_T_C_-	YBR198C_5UTR_0_21	0.0876125	0.24385	0.801867	0.428852	0.708629	-6.08767	TSS	YBR198C	YBR198C	1	TRUE	-	2	100	1	chrII	618646	T	C	TRUE	0	0	1	0	-1	0	0	0.001978	5.89281	TRUE	0.0437377	0.0327545	171	2837	1323	582	TRUE	TRUE	FALSE	123	NA	FALSE	0.001978	0.001978	TRUE
chrII_618646_T_C_+	YBR199W_chrII_618646_T_C_72_2	-0.0691099	0.728134	-0.482067	0.636042	0.869523	-6.17807	UpStream	YBR199W	YBR199W	1	TRUE	+	1	73	1	chrII	618646	T	C	TRUE	0	0	1	0	-1	0	0	0.001978	7.36496	FALSE	0.135961	0.102928	9	536	79	22	FALSE	FALSE	FALSE	263	NA	FALSE	0.001978	0.001978	TRUE
chrII_618736_T_G_+	YBR199W_5UTR_0_2	-0.071722	-0.0824433	-1.72203	0.0952231	0.334493	-5.70318	TSS	YBR199W	YBR199W	1	TRUE	+	1	71	1	chrII	618736	T	G	TRUE	0	0	0	1	-1	0	1	0.733	7.36496	FALSE	0.135961	0.102928	9	536	79	22	FALSE	FALSE	FALSE	173	NA	FALSE	0.267	0.267	FALSE
chrII_618736_T_G_-	YBR198C_5UTR_0_12	-0.0149048	0.18486	-0.123924	0.902191	0.963814	-6.49902	TSS	YBR198C	YBR198C	1	TRUE	-	2	10	2	chrII	618736	T	G	TRUE	0	0	0	1	-1	0	0	0.733	5.89281	TRUE	0.0437377	0.0327545	171	2837	1323	582	TRUE	TRUE	FALSE	213	NA	FALSE	0.267	0.267	FALSE
chrII_618908_T_C_-	YBR198C_chrII_618908_T_C_72_2	-0.153863	-0.372273	-1.56062	0.13744	0.429224	-5.4753	UpStream	YBR198C	YBR198C	1	TRUE	-	1	73	1	chrII	618908	T	C	TRUE	0	0	1	0	-1	0	1	0.895	5.89281	TRUE	0.0437377	0.0327545	171	2837	1323	582	TRUE	TRUE	FALSE	385	2.42	TRUE	0.105	0.105	FALSE
chrII_620680_A_G_+	YBR200W_5UTR_0_2	0.0683597	-0.675783	1.83784	0.0758748	0.295231	-5.74097	TSS	YBR200W	YBR200W	1	TRUE	+	1	8	1	chrII	620680	A	G	TRUE	0	-1	0	1	0	0	0	0.621	5.41338	FALSE	NA	NA	87	589	242	136	FALSE	FALSE	FALSE	192	NA	FALSE	0.379	0.621	TRUE
chrII_623413_A_T_+	YBR201W_5UTR_0_211	0.00662823	-0.0298554	0.0604643	0.952181	0.986304	-6.71979	TSS	YBR201W	YBR201W	1	TRUE	+	3	118	1	chrII	623413	A	T	TRUE	0	-1	0	0	1	0	0	0.782	5.45553	FALSE	0.0847021	0.0649266	14	1272	459	201	FALSE	FALSE	FALSE	163	1.89	TRUE	0.218	0.218	FALSE
chrII_623418_A_T_+	YBR201W_5UTR_0_121	0.189975	0.0594989	1.92077	0.0641806	0.270585	-4.92145	TSS	YBR201W	YBR201W	1	TRUE	+	3	123	2	chrII	623418	A	T	TRUE	0	-1	0	0	1	0	0	0.782	5.45553	FALSE	0.0847021	0.0649266	14	1272	459	201	FALSE	FALSE	FALSE	158	1.89	TRUE	0.218	0.218	FALSE
chrII_623427_A_G_+	YBR201W_5UTR_0_112	0.24639	0.0865126	2.31336	0.027642	0.168529	-4.21967	TSS	YBR201W	YBR201W	1	TRUE	+	3	132	3	chrII	623427	A	G	TRUE	0	-1	0	1	0	0	0	0.691	5.45553	FALSE	0.0847021	0.0649266	14	1272	459	201	FALSE	FALSE	FALSE	149	1.89	TRUE	0.309	0.691	TRUE
chrII_624805_G_A_+	YBR202W_chrII_624805_G_A_72_2	-0.0686204	-0.346957	-1.0596	0.304475	0.641235	-6.2437	UpStream	YBR202W	YBR202W	1	TRUE	+	1	73	1	chrII	624805	G	A	TRUE	0	1	0	-1	0	0	0	0.754	5.77817	TRUE	0.0402092	0.0272409	39	1272	625	339	FALSE	TRUE	FALSE	967	4.28	TRUE	0.246	0.246	FALSE
chrII_624836_C_A_+	YBR202W_chrII_624836_C_A_72_2	-0.0158964	-1.20288	-0.192485	0.849693	0.950508	-6.75462	UpStream	YBR202W	YBR202W	1	TRUE	+	1	73	1	chrII	624836	C	A	TRUE	0	1	-1	0	0	0	0	0.691	5.77817	TRUE	0.0402092	0.0272409	39	1272	625	339	FALSE	TRUE	FALSE	936	4.28	TRUE	0.309	0.309	FALSE
chrII_625298_A_G_+	YBR202W_chrII_625298_A_G_72_2	-0.0537104	-0.798405	-0.507002	0.61881	0.859935	-6.61305	UpStream	YBR202W	YBR202W	1	TRUE	+	1	73	1	chrII	625298	A	G	TRUE	0	-1	0	1	0	0	0	0.973	5.77817	TRUE	0.0402092	0.0272409	39	1272	625	339	FALSE	TRUE	FALSE	474	2.48	TRUE	0.027	0.027	FALSE
chrII_628345_T_C_+	YBR203W_chrII_628345_T_C_72_2	-0.126775	-0.00571568	-1.05368	0.3071	0.643273	-6.02097	UpStream	YBR203W	YBR203W	1	TRUE	+	1	73	1	chrII	628345	T	C	TRUE	0	0	1	0	-1	0	0	0.532	3.95895	FALSE	0.114204	0.0819614	6	851	265	91	FALSE	FALSE	FALSE	823	6.15	TRUE	0.468	0.532	TRUE
chrII_628361_C_CT_+	YBR203W_chrII_628361_C_CT_72_2	-0.0801319	-0.504822	-0.654212	0.52192	0.806075	-6.15814	UpStream	YBR203W	YBR203W	1	TRUE	+	1	73	1	chrII	628361	C	CT	FALSE	1	0	0	0	1	0	0	0.642	3.95895	FALSE	0.114204	0.0819614	6	851	265	91	FALSE	FALSE	FALSE	807	6.15	TRUE	0.358	0.642	TRUE
chrII_628558_GTT_G_+	YBR203W_chrII_628558_GTT_G_72_2	-0.238331	-0.548373	-1.00885	0.327501	0.664665	-5.62956	UpStream	YBR203W	YBR203W	1	TRUE	+	1	72	1	chrII	628558	GTT	G	FALSE	-2	0	0	0	-2	0	0	0.458	3.95895	FALSE	0.114204	0.0819614	6	851	265	91	FALSE	FALSE	FALSE	610	3.94	TRUE	0.458	NA	NA
chrII_628674_T_C_+	YBR203W_chrII_628674_T_C_72_2	0.0288543	1.15484	0.359852	0.723487	0.909432	-6.91705	UpStream	YBR203W	YBR203W	1	TRUE	+	1	73	1	chrII	628674	T	C	TRUE	0	0	1	0	-1	0	0	0.714	3.95895	FALSE	0.114204	0.0819614	6	851	265	91	FALSE	FALSE	FALSE	494	NA	FALSE	0.286	0.286	FALSE
chrII_628692_G_C_+	YBR203W_chrII_628692_G_C_72_2	-0.254444	1.63347	-3.14748	0.0059991	0.0730517	-2.73611	UpStream	YBR203W	YBR203W	1	TRUE	+	1	73	1	chrII	628692	G	C	TRUE	0	0	1	-1	0	0	0	0.013	3.95895	FALSE	0.114204	0.0819614	6	851	265	91	FALSE	FALSE	FALSE	476	NA	FALSE	0.013	0.987	FALSE
chrII_629013_G_A_+	YBR203W_chrII_629013_G_A_72_2	-0.0965958	-1.13845	-0.836888	0.41452	0.740404	-6.27306	UpStream	YBR203W	YBR203W	1	TRUE	+	1	73	1	chrII	629013	G	A	TRUE	0	1	0	-1	0	0	0	0.974	3.95895	FALSE	0.114204	0.0819614	6	851	265	91	FALSE	FALSE	FALSE	155	NA	FALSE	0.026	0.026	FALSE
chrII_633468_T_G_-	YBR204C_5UTR_0_2	0.103614	-0.565171	0.993639	0.328241	0.626942	-6.06037	TSS	YBR204C	YBR204C	1	TRUE	-	1	102	1	chrII	633468	T	G	TRUE	0	0	0	1	-1	0	0	0.846	4.96725	FALSE	NA	NA	1	406	76	25	FALSE	FALSE	FALSE	87	NA	FALSE	0.154	0.154	FALSE
chrII_633468_T_G_+	YBR205W_chrII_633468_T_G_72_2	-0.168434	-0.843577	-1.96176	0.066751	0.288599	-5.02062	UpStream	YBR205W	YBR205W	1	TRUE	+	1	73	1	chrII	633468	T	G	TRUE	0	0	0	1	-1	0	0	0.846	6.64784	FALSE	0.106975	0.0679233	24	850	94	23	FALSE	FALSE	FALSE	154	NA	FALSE	0.154	0.154	FALSE
chrII_633618_A_C_+	YBR206W_chrII_633618_A_C_72_2	-0.0142494	0.0137864	-0.236706	0.815776	0.938221	-6.79938	UpStream	YBR206W	YBR205W	2	FALSE	+	1	73	1	chrII	633618	A	C	TRUE	0	-1	1	0	0	0	0	0.817	6.64784	FALSE	0.106975	0.0679233	24	850	94	23	FALSE	FALSE	FALSE	4	3.47	TRUE	0.183	0.183	FALSE
chrII_633960_C_T_+	YBR206W_chrII_633960_C_T_72_2	0.131381	-0.802418	1.1424	0.26947	0.604245	-6.06418	UpStream	YBR206W	YBR206W	1	TRUE	+	1	73	1	chrII	633960	C	T	TRUE	0	0	-1	0	1	0	0	0.836	6.77736	FALSE	NA	NA	NA	452	55	21	FALSE	FALSE	FALSE	641	8.01	TRUE	0.164	0.164	FALSE
chrII_643914_G_A_-	tC(GCA)B_chrII_643914_G_A_72_2	-0.0677179	-0.762262	-0.460888	0.650849	0.874241	-6.60291	UpStream	tC(GCA)B	tC(GCA)B	1	TRUE	-	1	73	1	chrII	643914	G	A	TRUE	0	1	0	-1	0	0	0	0.837	NA	FALSE	NA	NA	1	NA	NA	NA	FALSE	FALSE	FALSE	836	3.46	TRUE	0.163	NA	NA
chrII_644646_C_T_+	tE(UUC)B_chrII_644646_C_T_72_2	-0.289575	-1.10338	-1.73463	0.101298	0.362401	-5.0569	UpStream	tE(UUC)B	tE(UUC)B	1	TRUE	+	1	73	1	chrII	644646	C	T	TRUE	0	0	-1	0	1	0	0	0.802	NA	FALSE	NA	NA	NA	NA	NA	NA	FALSE	FALSE	FALSE	521	1.82	TRUE	0.198	NA	NA
chrII_645476_G_A_+	YBR210W_chrII_645476_G_A_72_2	0.112951	-0.775313	1.17458	0.256708	0.591038	-5.82838	UpStream	YBR210W	YBR210W	1	TRUE	+	1	73	1	chrII	645476	G	A	TRUE	0	1	0	-1	0	0	0	0.014	6.32532	FALSE	NA	NA	4	883	248	87	FALSE	TRUE	TRUE	74	NA	FALSE	0.014	NA	NA
chrII_647422_C_G_+	YBR212W_5UTR_0_2	0.0958345	-0.7599	1.85854	0.072796	0.286558	-5.64551	TSS	YBR212W	YBR212W	1	TRUE	+	1	87	1	chrII	647422	C	G	TRUE	0	0	-1	1	0	0	0	0.493	4.87628	FALSE	0.118308	0.0880873	19	920	322	135	FALSE	TRUE	FALSE	464	NA	FALSE	0.493	0.493	TRUE
chrII_647590_AT_A_-	YBR211C_chrII_647590_AT_A_72_2	0.00517689	-1.05008	0.0654547	0.948592	0.982285	-6.75884	UpStream	YBR211C	YBR211C	1	TRUE	-	1	74	1	chrII	647590	AT	A	FALSE	-1	0	0	0	-1	0	0	0.585	4.91769	TRUE	0.129288	0.0981799	49	1119	499	219	FALSE	FALSE	FALSE	458	NA	FALSE	0.415	NA	NA
chrII_653039_C_CAA_+	YBR215W_chrII_653039_C_CAA_72_2	0.112295	0.0904502	0.861506	0.401211	0.733638	-6.03698	UpStream	YBR215W	YBR215W	1	TRUE	+	1	73	1	chrII	653039	C	CAA	FALSE	2	2	0	0	0	0	0	0.149	5.17565	FALSE	0.181469	0.136232	20	1035	453	222	FALSE	FALSE	FALSE	317	1.86	TRUE	0.149	NA	NA
chrII_653233_AT_A_+	YBR215W_5UTR_0_211	-0.0605568	-0.195858	-0.498354	0.62182	0.841384	-6.34323	TSS	YBR215W	YBR215W	1	TRUE	+	3	59	1	chrII	653233	AT	A	FALSE	-1	0	0	0	-1	0	0	0.637	5.17565	FALSE	0.181469	0.136232	20	1035	453	222	FALSE	FALSE	FALSE	123	NA	FALSE	0.363	0.637	TRUE
chrII_653239_G_A_+	YBR215W_5UTR_0_121	-0.151609	-0.247527	-1.33022	0.193337	0.478611	-5.51876	TSS	YBR215W	YBR215W	1	TRUE	+	3	65	2	chrII	653239	G	A	TRUE	0	1	0	-1	0	0	0	0.637	5.17565	FALSE	0.181469	0.136232	20	1035	453	222	FALSE	FALSE	FALSE	117	NA	FALSE	0.363	0.637	TRUE
chrII_653275_A_G_+	YBR215W_5UTR_0_112	-0.297627	-0.31269	-1.90775	0.0659074	0.274388	-4.71958	TSS	YBR215W	YBR215W	1	TRUE	+	3	101	3	chrII	653275	A	G	TRUE	0	-1	0	1	0	0	0	0.818	5.17565	FALSE	0.181469	0.136232	20	1035	453	222	FALSE	FALSE	FALSE	81	NA	FALSE	0.182	NA	NA
chrII_657722_C_T_+	YBR217W_5UTR_0_2	0.0712765	-0.30103	0.955749	0.346737	0.644031	-6.48913	TSS	YBR217W	YBR217W	1	TRUE	+	1	99	1	chrII	657722	C	T	TRUE	0	0	-1	0	1	0	0	0.381	4.88763	FALSE	0.0950769	0.0753826	54	1103	351	139	FALSE	FALSE	FALSE	110	NA	FALSE	0.381	NA	NA
chrII_657722_C_T_-	YBR216C_chrII_657722_C_T_72_2	0.060176	-0.892785	0.707391	0.489119	0.790336	-6.5666	UpStream	YBR216C	YBR216C	1	TRUE	-	1	73	1	chrII	657722	C	T	TRUE	0	0	-1	0	1	0	0	0.381	4.67819	FALSE	0.156169	0.116434	6	910	267	93	FALSE	FALSE	TRUE	122	NA	FALSE	0.381	NA	NA
chrII_662354_G_A_-	YBR218C_chrII_662354_G_A_72_2	-0.59175	-0.838885	-5.11091	9.29809e-05	0.00347443	1.5055	UpStream	YBR218C	YBR218C	1	TRUE	-	1	73	1	chrII	662354	G	A	TRUE	0	1	0	-1	0	0	0	0.653	6.12604	FALSE	NA	NA	13	745	290	137	FALSE	TRUE	TRUE	105	4.55	TRUE	0.347	0.653	TRUE
chrII_662444_G_A_-	YBR218C_5UTR_0_12	0.0451012	-0.555167	0.625148	0.536538	0.785134	-6.98225	TSS	YBR218C	YBR218C	1	TRUE	-	2	12	2	chrII	662444	G	A	TRUE	0	1	0	-1	0	0	0	0.929	6.12604	FALSE	NA	NA	13	745	290	137	FALSE	TRUE	TRUE	195	4.55	TRUE	0.071	0.071	FALSE
chrII_662477_T_A_-	YBR218C_chrII_662477_T_A_72_2	-0.215726	-0.463468	-1.89974	0.0749507	0.304504	-4.85607	UpStream	YBR218C	YBR218C	1	TRUE	-	1	73	1	chrII	662477	T	A	TRUE	0	1	0	0	-1	0	0	0.553	6.12604	FALSE	NA	NA	13	745	290	137	FALSE	TRUE	TRUE	228	4.55	TRUE	0.447	0.553	TRUE
chrII_663901_T_C_-	YBR219C_chrII_663901_T_C_72_2	-0.203016	-1.19984	-2.02214	0.0595514	0.273698	-4.94277	UpStream	YBR219C	YBR219C	1	TRUE	-	1	73	1	chrII	663901	T	C	TRUE	0	0	1	0	-1	0	0	0.682	NA	FALSE	NA	NA	2	352	59	8	FALSE	FALSE	FALSE	598	NA	FALSE	0.318	0.682	TRUE
chrII_664761_G_T_-	YBR220C_chrII_664761_G_T_72_2	0.167034	-1.2026	2.06398	0.0549825	0.263928	-4.87563	UpStream	YBR220C	YBR220C	1	TRUE	-	1	73	1	chrII	664761	G	T	TRUE	0	0	0	-1	1	0	1	0.689	6.12175	FALSE	NA	NA	2	833	174	56	FALSE	TRUE	FALSE	84	2.8	TRUE	0.311	0.311	FALSE
chrII_669262_C_T_+	YBR224W_chrII_669262_C_T_72_2	0.121548	-0.692603	0.809259	0.429793	0.75028	-6.09748	UpStream	YBR224W	YBR224W	1	TRUE	+	1	73	1	chrII	669262	C	T	TRUE	0	0	-1	0	1	0	0	0.769	NA	FALSE	NA	NA	NA	438	212	89	FALSE	FALSE	FALSE	863	4.19	TRUE	0.231	0.231	FALSE
chrII_669668_G_A_+	YBR224W_chrII_669668_G_A_72_2	-0.104314	-0.920542	-0.957111	0.352219	0.686166	-6.24885	UpStream	YBR224W	YBR224W	1	TRUE	+	1	73	1	chrII	669668	G	A	TRUE	0	1	0	-1	0	0	0	0.945	NA	FALSE	NA	NA	NA	438	212	89	FALSE	FALSE	FALSE	457	1.02	TRUE	0.055	0.055	FALSE
chrII_670480_A_T_+	YBR225W_chrII_670480_A_T_72_2	0.0182528	-0.756277	0.185248	0.855275	0.952223	-6.6554	UpStream	YBR225W	YBR225W	1	TRUE	+	1	73	1	chrII	670480	A	T	TRUE	0	-1	0	0	1	0	0	0.621	3.65977	FALSE	0.125264	0.0915869	18	842	179	55	FALSE	FALSE	FALSE	147	6.97	TRUE	0.379	0.621	TRUE
chrII_675146_G_A_+	YBR228W_chrII_675146_G_A_72_2	0.136143	-1.08974	1.05269	0.307541	0.643443	-6.10352	UpStream	YBR228W	YBR228W	1	TRUE	+	1	73	1	chrII	675146	G	A	TRUE	0	1	0	-1	0	0	-1	0.778	5.05372	FALSE	0.116647	0.0924651	7	712	163	72	FALSE	TRUE	FALSE	167	2.31	TRUE	0.222	0.222	FALSE
chrII_675204_T_A_+	YBR228W_chrII_675204_T_A_72_2	0.0315087	-0.677	0.269157	0.79112	0.931685	-6.53936	UpStream	YBR228W	YBR228W	1	TRUE	+	1	73	1	chrII	675204	T	A	TRUE	0	1	0	0	-1	0	0	0.782	5.05372	FALSE	0.116647	0.0924651	7	712	163	72	FALSE	TRUE	FALSE	109	2.31	TRUE	0.218	0.218	FALSE
chrII_675206_A_G_+	YBR228W_chrII_675206_A_G_72_2	-0.197114	-1.63925	-1.05261	0.307574	0.643443	-5.86881	UpStream	YBR228W	YBR228W	1	TRUE	+	1	73	1	chrII	675206	A	G	TRUE	0	-1	0	1	0	0	0	0.622	5.05372	FALSE	0.116647	0.0924651	7	712	163	72	FALSE	TRUE	FALSE	107	NA	FALSE	0.378	0.622	TRUE
chrII_675236_C_T_+	YBR228W_chrII_675236_C_T_72_2	0.0212286	-0.528802	0.164872	0.871032	0.956036	-6.26632	UpStream	YBR228W	YBR228W	1	TRUE	+	1	73	1	chrII	675236	C	T	TRUE	0	0	-1	0	1	0	0	0.784	5.05372	FALSE	0.116647	0.0924651	7	712	163	72	FALSE	TRUE	FALSE	77	NA	FALSE	0.216	0.216	FALSE
chrII_683268_A_G_-	YBR231C_chrII_683268_A_G_72_2	-0.399376	0.324001	-5.44131	4.74944e-05	0.00216584	2.04124	UpStream	YBR231C	YBR231C	1	TRUE	-	1	73	1	chrII	683268	A	G	TRUE	0	-1	0	1	0	0	0	0.633	5.60653	FALSE	NA	NA	19	1039	807	563	FALSE	TRUE	FALSE	178	NA	FALSE	0.367	0.633	TRUE
chrII_684840_ATT_ATTTT_+	YBR233W-A_chrII_684840_ATT_ATTTT_72_2	-0.0174151	-0.107989	-0.161854	0.873371	0.956036	-6.45814	UpStream	YBR233W-A	YBR233W-A	1	TRUE	+	1	73	1	chrII	684840	ATT	ATTTT	FALSE	2	0	0	0	2	0	0	0.124	6.1426	TRUE	0.132116	0.0996541	15	NA	NA	NA	FALSE	FALSE	FALSE	137	NA	FALSE	0.124	NA	NA
chrII_686624_C_T_+	YBR235W_chrII_686624_C_T_72_2	-0.146215	-0.516189	-1.17909	0.254955	0.590278	-5.92666	UpStream	YBR235W	YBR235W	1	TRUE	+	1	73	1	chrII	686624	C	T	TRUE	0	0	-1	0	1	0	0	0.982	4.71889	FALSE	0.0452243	0.0338579	6	775	128	46	FALSE	TRUE	FALSE	277	3.63	TRUE	0.018	0.018	FALSE
chrII_686767_A_G_-	YBR234C_5UTR_0_2	0.0275131	-0.212697	0.833835	0.410877	0.697824	-7.13541	TSS	YBR234C	YBR234C	1	TRUE	-	1	16	1	chrII	686767	A	G	TRUE	0	-1	0	1	0	0	0	0.665	7.69923	TRUE	0.0602666	0.0405989	44	1163	314	103	FALSE	TRUE	FALSE	175	9.68	TRUE	0.335	0.665	TRUE
chrII_686767_A_G_+	YBR235W_5UTR_0_21	0.188778	-0.235816	1.9777	0.0570878	0.253306	-5.07089	TSS	YBR235W	YBR235W	1	TRUE	+	2	92	1	chrII	686767	A	G	TRUE	0	-1	0	1	0	0	0	0.665	4.71889	FALSE	0.0452243	0.0338579	6	775	128	46	FALSE	TRUE	FALSE	134	9.68	TRUE	0.335	0.665	TRUE
chrII_686783_G_A_+	YBR235W_chrII_686783_G_A_72_2	-0.100745	-1.01384	-0.816237	0.425902	0.747294	-6.41595	UpStream	YBR235W	YBR235W	1	TRUE	+	1	73	1	chrII	686783	G	A	TRUE	0	1	0	-1	0	0	0	0.666	4.71889	FALSE	0.0452243	0.0338579	6	775	128	46	FALSE	TRUE	FALSE	118	9.68	TRUE	0.334	0.666	TRUE
chrII_686783_G_A_-	YBR234C_chrII_686783_G_A_72_2	-0.0872739	0.274492	-1.341	0.197949	0.520678	-5.91805	UpStream	YBR234C	YBR234C	1	TRUE	-	1	73	1	chrII	686783	G	A	TRUE	0	1	0	-1	0	0	0	0.666	7.69923	TRUE	0.0602666	0.0405989	44	1163	314	103	FALSE	TRUE	FALSE	191	9.68	TRUE	0.334	0.666	TRUE
chrII_691742_T_C_-	YBR236C_5UTR_0_2111	0.205459	-0.0696978	1.78743	0.083841	0.309183	-5.01972	TSS	YBR236C	YBR236C	1	TRUE	-	4	134	1	chrII	691742	T	C	TRUE	0	0	1	0	-1	0	0	0.686	5.92113	TRUE	0.0624434	0.0473395	7	1511	637	252	FALSE	TRUE	FALSE	49	1.09	TRUE	0.314	0.314	FALSE
chrII_691776_G_T_+	YBR237W_5UTR_0_21111	0.174109	-0.871488	1.17038	0.250939	0.549494	-5.57101	TSS	YBR237W	YBR237W	1	TRUE	+	5	8	1	chrII	691776	G	T	TRUE	0	0	0	-1	1	0	0	0.687	4.71071	TRUE	0.0989098	0.0781923	12	1290	365	148	FALSE	FALSE	FALSE	193	2.74	TRUE	0.313	0.313	FALSE
chrII_691776_G_T_-	YBR236C_chrII_691776_G_T_72_2	-0.280871	-2.02933	-1.76371	0.0961402	0.349878	-5.03816	UpStream	YBR236C	YBR236C	1	TRUE	-	1	73	1	chrII	691776	G	T	TRUE	0	0	0	-1	1	0	0	0.687	5.92113	TRUE	0.0624434	0.0473395	7	1511	637	252	FALSE	TRUE	FALSE	83	2.74	TRUE	0.313	0.313	FALSE
chrII_691838_G_A_-	YBR236C_5UTR_0_1121	-0.0677319	-0.208576	-0.645213	0.523628	0.775057	-6.34553	TSS	YBR236C	YBR236C	1	TRUE	-	4	38	3	chrII	691838	G	A	TRUE	0	1	0	-1	0	0	0	0.685	5.92113	TRUE	0.0624434	0.0473395	7	1511	637	252	FALSE	TRUE	FALSE	145	2.74	TRUE	0.315	0.315	FALSE
chrII_691838_G_A_+	YBR237W_5UTR_0_12111	0.120681	-0.847764	0.732241	0.469628	0.739534	-5.85635	TSS	YBR237W	YBR237W	1	TRUE	+	5	70	2	chrII	691838	G	A	TRUE	0	1	0	-1	0	0	0	0.685	4.71071	TRUE	0.0989098	0.0781923	12	1290	365	148	FALSE	FALSE	FALSE	131	2.74	TRUE	0.315	0.315	FALSE
chrII_691869_G_A_-	YBR236C_5UTR_0_1112	-0.0702683	-0.207119	-0.678818	0.502388	0.759336	-6.28288	TSS	YBR236C	YBR236C	1	TRUE	-	4	7	4	chrII	691869	G	A	TRUE	0	1	0	-1	0	0	0	0.674	5.92113	TRUE	0.0624434	0.0473395	7	1511	637	252	FALSE	TRUE	FALSE	176	2.74	TRUE	0.326	0.674	TRUE
chrII_691869_G_A_+	YBR237W_5UTR_0_11211	0.0383602	-0.940789	0.260845	0.795971	0.91809	-6.22223	TSS	YBR237W	YBR237W	1	TRUE	+	5	101	3	chrII	691869	G	A	TRUE	0	1	0	-1	0	0	-1	0.674	4.71071	TRUE	0.0989098	0.0781923	12	1290	365	148	FALSE	FALSE	FALSE	100	2.74	TRUE	0.326	0.674	TRUE
chrII_691880_A_G_+	YBR237W_5UTR_0_11121	-0.333679	-1.11144	-1.43226	0.16227	0.440905	-5.26147	TSS	YBR237W	YBR237W	1	TRUE	+	5	112	4	chrII	691880	A	G	TRUE	0	-1	0	1	0	0	0	0.68	4.71071	TRUE	0.0989098	0.0781923	12	1290	365	148	FALSE	FALSE	FALSE	89	2.74	TRUE	0.32	0.68	TRUE
chrII_691893_T_C_+	YBR237W_5UTR_0_11112	-0.0782983	-0.996325	-0.360162	0.721216	0.886911	-6.18191	TSS	YBR237W	YBR237W	1	TRUE	+	5	125	5	chrII	691893	T	C	TRUE	0	0	1	0	-1	0	0	0.686	4.71071	TRUE	0.0989098	0.0781923	12	1290	365	148	FALSE	FALSE	FALSE	76	6.23	TRUE	0.314	0.314	FALSE
chrII_697455_C_T_-	YBR238C_5UTR_0_21	0.162093	-0.0769637	1.68084	0.10304	0.349807	-5.1285	TSS	YBR238C	YBR238C	1	TRUE	-	2	76	1	chrII	697455	C	T	TRUE	0	0	-1	0	1	0	0	0.979	3.70233	FALSE	NA	NA	7	1233	652	334	FALSE	FALSE	TRUE	153	1.99	TRUE	0.021	0.021	FALSE
chrII_697507_A_C_-	YBR238C_5UTR_0_12	0.101702	-0.11943	1.12562	0.269133	0.56942	-5.88379	TSS	YBR238C	YBR238C	1	TRUE	-	2	24	2	chrII	697507	A	C	TRUE	0	-1	1	0	0	0	0	0.012	3.70233	FALSE	NA	NA	7	1233	652	334	FALSE	FALSE	TRUE	205	1.99	TRUE	0.012	0.012	TRUE
chrII_700097_T_C_-	YBR239C_chrII_700097_T_C_72_2	-0.205966	-1.74851	-2.08258	0.0530563	0.259517	-4.78514	UpStream	YBR239C	YBR239C	1	TRUE	-	1	73	1	chrII	700097	T	C	TRUE	0	0	1	0	-1	0	0	0.832	3.98728	FALSE	NA	NA	8	688	159	54	TRUE	FALSE	FALSE	154	3.22	TRUE	0.168	0.832	TRUE
chrII_700199_A_T_-	YBR239C_5UTR_0_121	-0.0150119	0.703329	-0.103072	0.918582	0.969029	-6.15672	TSS	YBR239C	YBR239C	1	TRUE	-	3	38	2	chrII	700199	A	T	TRUE	0	-1	0	0	1	0	0	0.965	3.98728	FALSE	NA	NA	8	688	159	54	TRUE	FALSE	FALSE	256	NA	FALSE	0.035	NA	NA
chrII_700223_G_C_-	YBR239C_5UTR_0_112	-0.184492	0.634858	-1.3421	0.1895	0.474005	-5.32198	TSS	YBR239C	YBR239C	1	TRUE	-	3	14	3	chrII	700223	G	C	TRUE	0	0	1	-1	0	0	1	0.713	3.98728	FALSE	NA	NA	8	688	159	54	TRUE	FALSE	FALSE	280	2.95	TRUE	0.287	0.713	TRUE
chrII_700246_T_C_-	YBR239C_chrII_700246_T_C_72_2	0.280006	0.120982	4.23321	0.000585287	0.0137947	-0.434224	UpStream	YBR239C	YBR239C	1	TRUE	-	1	73	1	chrII	700246	T	C	TRUE	0	0	1	0	-1	0	0	0.977	3.98728	FALSE	NA	NA	8	688	159	54	TRUE	FALSE	FALSE	303	2.95	TRUE	0.023	0.023	FALSE
chrII_720641_CT_CTT_+	YBR251W_chrII_720641_CT_CTT_72_2	-0.452658	-1.47677	-1.59637	0.129232	0.414302	-4.95706	UpStream	YBR251W	YBR251W	1	TRUE	+	1	73	1	chrII	720641	CT	CTT	FALSE	1	0	0	0	1	0	0	0.371	5.92698	FALSE	0.029729	0.0222971	55	97	91	66	FALSE	TRUE	FALSE	749	5.33	TRUE	0.371	NA	NA
chrII_721088_C_T_+	YBR251W_chrII_721088_C_T_72_2	0.0754005	-0.53514	0.51474	0.613508	0.857885	-6.49642	UpStream	YBR251W	YBR251W	1	TRUE	+	1	73	1	chrII	721088	C	T	TRUE	0	0	-1	0	1	0	0	0.798	5.92698	FALSE	0.029729	0.0222971	55	97	91	66	FALSE	TRUE	FALSE	302	2.01	TRUE	0.202	0.202	FALSE
chrII_734729_CT_C_-	YBR260C_5UTR_0_21	-0.174718	-0.938808	-2.66726	0.0121406	0.102637	-3.80873	TSS	YBR260C	YBR260C	1	TRUE	-	2	64	1	chrII	734729	CT	C	FALSE	-1	0	0	0	-1	0	0	0.359	5.21138	FALSE	0.0511536	0.0375655	21	1088	395	173	FALSE	TRUE	FALSE	90	NA	FALSE	0.359	0.359	TRUE
chrII_734775_G_A_-	YBR260C_5UTR_0_12	-0.168233	-0.932418	-2.45229	0.0201451	0.142851	-4.21398	TSS	YBR260C	YBR260C	1	TRUE	-	2	18	2	chrII	734775	G	A	TRUE	0	1	0	-1	0	0	0	0.764	5.21138	FALSE	0.0511536	0.0375655	21	1088	395	173	FALSE	TRUE	FALSE	136	NA	FALSE	0.236	0.236	FALSE
chrII_744516_A_G_+	YBR271W_chrII_744516_A_G_72_2	0.10092	-0.758664	1.3377	0.199002	0.52263	-5.7917	UpStream	YBR271W	YBR271W	1	TRUE	+	1	73	1	chrII	744516	A	G	TRUE	0	-1	0	1	0	0	0	0.732	5.46302	FALSE	0.166805	0.128244	4	480	76	16	FALSE	FALSE	FALSE	336	NA	FALSE	0.268	0.732	TRUE
chrII_744519_A_G_+	YBR271W_chrII_744519_A_G_72_2	0.0737645	-0.838971	0.457446	0.65327	0.875227	-6.39703	UpStream	YBR271W	YBR271W	1	TRUE	+	1	73	1	chrII	744519	A	G	TRUE	0	-1	0	1	0	0	0	0.988	5.46302	FALSE	0.166805	0.128244	4	480	76	16	FALSE	FALSE	FALSE	333	NA	FALSE	0.012	0.012	FALSE
chrII_744640_A_T_+	YBR271W_chrII_744640_A_T_72_2	0.0293744	-0.913232	0.14258	0.888335	0.963235	-6.39219	UpStream	YBR271W	YBR271W	1	TRUE	+	1	73	1	chrII	744640	A	T	TRUE	0	-1	0	0	1	0	0	0.901	5.46302	FALSE	0.166805	0.128244	4	480	76	16	FALSE	FALSE	FALSE	212	4.34	TRUE	0.099	0.099	FALSE
chrII_744718_GTT_GT_-	YBR270C_5UTR_0_2	0.267317	-1.04611	1.48846	0.146928	0.416754	-5.09624	TSS	YBR270C	YBR270C	1	TRUE	-	1	97	1	chrII	744718	GTT	GT	FALSE	-1	0	0	0	-1	0	0	0.71	4.14661	FALSE	0.0849062	0.0663743	17	879	160	53	FALSE	FALSE	TRUE	320	NA	FALSE	0.29	NA	NA
chrII_744718_GTT_GT_+	YBR271W_chrII_744718_GTT_GT_72_2	-0.203804	-0.486016	-1.16998	0.258505	0.59244	-5.82813	UpStream	YBR271W	YBR271W	1	TRUE	+	1	72	1	chrII	744718	GTT	GT	FALSE	-1	0	0	0	-1	0	0	0.71	5.46302	FALSE	0.166805	0.128244	4	480	76	16	FALSE	FALSE	FALSE	134	NA	FALSE	0.29	NA	NA
chrII_747841_GT_G_-	YBR272C_5UTR_0_21	-0.0674207	0.845372	-0.525808	0.602836	0.830884	-6.32566	TSS	YBR272C	YBR272C	1	TRUE	-	2	114	1	chrII	747841	GT	G	FALSE	-1	0	0	0	-1	0	0	0.784	5.48	FALSE	0.173718	0.125824	35	773	143	46	FALSE	FALSE	FALSE	38	1.17	TRUE	0.216	0.216	FALSE
chrII_747926_G_GA_-	YBR272C_5UTR_0_12	0.031239	0.90002	0.284595	0.777884	0.913299	-6.41844	TSS	YBR272C	YBR272C	1	TRUE	-	2	29	2	chrII	747926	G	GA	FALSE	1	1	0	0	0	0	0	0.009415	5.48	FALSE	0.173718	0.125824	35	773	143	46	FALSE	FALSE	FALSE	123	0.85	TRUE	0.009415	NA	NA
chrII_757411_T_C_-	YBR275C_chrII_757411_T_C_72_2	0.365885	-1.4673	3.16513	0.00577772	0.0719238	-2.44455	UpStream	YBR275C	YBR275C	1	TRUE	-	1	73	1	chrII	757411	T	C	TRUE	0	0	1	0	-1	0	0	0.604	4.36274	FALSE	NA	NA	24	844	116	47	FALSE	FALSE	FALSE	305	3.23	TRUE	0.396	0.604	TRUE
chrII_757437_G_C_-	YBR275C_chrII_757437_G_C_72_2	0.487314	-0.811263	1.39658	0.180902	0.49507	-4.84391	UpStream	YBR275C	YBR275C	1	TRUE	-	1	73	1	chrII	757437	G	C	TRUE	0	0	1	-1	0	0	1	0.849	4.36274	FALSE	NA	NA	24	844	116	47	FALSE	FALSE	FALSE	331	3.23	TRUE	0.151	0.151	FALSE
chrII_757513_C_T_-	YBR275C_chrII_757513_C_T_72_2	-0.248291	-1.36582	-1.83545	0.0843861	0.325385	-4.89907	UpStream	YBR275C	YBR275C	1	TRUE	-	1	73	1	chrII	757513	C	T	TRUE	0	0	-1	0	1	0	0	0.607	4.36274	FALSE	NA	NA	24	844	116	47	FALSE	FALSE	FALSE	407	NA	FALSE	0.393	0.607	TRUE
chrII_767663_T_C_-	YBR281C_5UTR_0_2111	-0.053979	-0.646757	-1.03457	0.30903	0.603733	-6.67556	TSS	YBR281C	YBR281C	1	TRUE	-	4	137	1	chrII	767663	T	C	TRUE	0	0	1	0	-1	0	0	0.66	4.66671	FALSE	0.0552272	0.0393519	13	961	169	34	FALSE	FALSE	FALSE	57	6.39	TRUE	0.34	0.66	TRUE
chrII_767690_A_T_-	YBR281C_5UTR_0_1211	0.0625756	-0.58874	1.40652	0.169709	0.451813	-6.28948	TSS	YBR281C	YBR281C	1	TRUE	-	4	110	2	chrII	767690	A	T	TRUE	0	-1	0	0	1	0	0	0.901	4.66671	FALSE	0.0552272	0.0393519	13	961	169	34	FALSE	FALSE	FALSE	84	6.39	TRUE	0.099	0.099	FALSE
chrII_767691_T_C_-	YBR281C_5UTR_0_1121	0.0599128	-0.589418	1.39706	0.17251	0.454268	-6.32467	TSS	YBR281C	YBR281C	1	TRUE	-	4	109	3	chrII	767691	T	C	TRUE	0	0	1	0	-1	0	0	0.651	4.66671	FALSE	0.0552272	0.0393519	13	961	169	34	FALSE	FALSE	FALSE	85	6.39	TRUE	0.349	0.651	TRUE
chrII_767731_T_C_-	YBR281C_5UTR_0_1112	0.172231	-0.535239	3.93121	0.000453187	0.00935663	-0.863789	TSS	YBR281C	YBR281C	1	TRUE	-	4	69	4	chrII	767731	T	C	TRUE	0	0	1	0	-1	0	0	0.208	4.66671	FALSE	0.0552272	0.0393519	13	961	169	34	FALSE	FALSE	FALSE	125	6.39	TRUE	0.208	0.208	TRUE
chrII_768017_CG_C_-	YBR281C_chrII_768017_CG_C_72_2	0.0504205	-0.888556	0.327747	0.747193	0.917616	-6.7114	UpStream	YBR281C	YBR281C	1	TRUE	-	1	74	1	chrII	768017	CG	C	FALSE	-1	0	0	-1	0	0	0	0.608	4.66671	FALSE	0.0552272	0.0393519	13	961	169	34	FALSE	FALSE	FALSE	411	1.05	TRUE	0.392	0.608	TRUE
chrII_768073_A_AT_+	YBR282W_5UTR_0_2111	-0.144767	-0.123704	-1.47865	0.14952	0.422924	-5.44433	TSS	YBR282W	YBR282W	1	TRUE	+	4	16	1	chrII	768073	A	AT	FALSE	1	0	0	0	1	0	0	0.974	6.53885	FALSE	0.04646	0.0349216	13	635	482	305	FALSE	FALSE	FALSE	167	NA	FALSE	0.026	NA	NA
chrII_768165_T_A_+	YBR282W_5UTR_0_1211	-0.17592	-0.139621	-1.2578	0.218039	0.509822	-5.58468	TSS	YBR282W	YBR282W	1	TRUE	+	4	108	2	chrII	768165	T	A	TRUE	0	1	0	0	-1	0	0	0.715	6.53885	FALSE	0.04646	0.0349216	13	635	482	305	FALSE	FALSE	FALSE	75	3.89	TRUE	0.285	0.715	TRUE
chrII_768183_TA_T_+	YBR282W_5UTR_0_1121	0.0463765	-0.0285936	0.470434	0.641402	0.850946	-6.4584	TSS	YBR282W	YBR282W	1	TRUE	+	4	126	3	chrII	768183	TA	T	FALSE	-1	-1	0	0	0	0	0	0.9	6.53885	FALSE	0.04646	0.0349216	13	635	482	305	FALSE	FALSE	FALSE	57	4.03	TRUE	0.1	0.9	TRUE
chrII_768196_G_A_+	YBR282W_5UTR_0_1112	0.12842	0.00740486	1.54939	0.131634	0.395014	-5.45458	TSS	YBR282W	YBR282W	1	TRUE	+	4	139	4	chrII	768196	G	A	TRUE	0	1	0	-1	0	0	0	0.618	6.53885	FALSE	0.04646	0.0349216	13	635	482	305	FALSE	FALSE	FALSE	44	4.03	TRUE	0.382	0.618	TRUE
chrII_770771_T_C_+	YBR284W_chrII_770771_T_C_72_2	-0.107753	-0.525486	-1.31617	0.20597	0.53063	-5.78214	UpStream	YBR284W	YBR284W	1	TRUE	+	1	73	1	chrII	770771	T	C	TRUE	0	0	1	0	-1	0	0	0.666	1.67236	FALSE	0.159189	0.123925	5	760	134	43	FALSE	FALSE	TRUE	468	4.29	TRUE	0.334	0.666	TRUE
chrII_773629_G_T_+	YBR285W_5UTR_0_21	-0.42465	-1.83135	-3.0746	0.00442625	0.0527323	-2.56072	TSS	YBR285W	YBR285W	1	TRUE	+	2	3	1	chrII	773629	G	T	TRUE	0	0	0	-1	1	0	0	0.002967	3.87739	FALSE	0.19692	0.131472	7	703	225	78	FALSE	FALSE	FALSE	293	2.15	TRUE	0.002967	0.002967	TRUE
chrII_773703_C_CAA_+	YBR285W_5UTR_0_12	0.378902	-1.42421	2.22989	0.0332817	0.186022	-4.20352	TSS	YBR285W	YBR285W	1	TRUE	+	2	77	2	chrII	773703	C	CAA	FALSE	2	2	0	0	0	0	0	0.375	3.87739	FALSE	0.19692	0.131472	7	703	225	78	FALSE	FALSE	FALSE	219	2.42	TRUE	0.375	NA	NA
chrII_785333_T_C_-	YBR292C_chrII_785333_T_C_72_2	-0.0170744	-0.83198	-0.159074	0.875526	0.956749	-6.76054	UpStream	YBR292C	YBR292C	1	TRUE	-	1	73	1	chrII	785333	T	C	TRUE	0	0	1	0	-1	0	0	0.081	NA	FALSE	NA	NA	NA	454	68	17	FALSE	FALSE	FALSE	260	4.08	TRUE	0.081	0.081	TRUE
chrII_785659_G_GA_-	YBR292C_chrII_785659_G_GA_72_2	-0.138695	-0.637876	-0.851062	0.406823	0.734582	-6.03053	UpStream	YBR292C	YBR292C	1	TRUE	-	1	73	1	chrII	785659	G	GA	FALSE	1	1	0	0	0	0	0	0.981	NA	FALSE	NA	NA	NA	454	68	17	FALSE	FALSE	FALSE	586	2.04	TRUE	0.019	0.019	FALSE
chrIII_27364_C_CTTTCT_-	YCL056C_5UTR_0_2	-0.0661319	0.203382	-1.57401	0.125834	0.385375	-5.89468	TSS	YCL056C	YCL056C	1	TRUE	-	1	142	1	chrIII	27364	C	CTTTCT	FALSE	5	0	1	0	4	0	0	0.258	5.86954	FALSE	0.138732	0.105835	17	561	67	19	FALSE	FALSE	FALSE	5	2.57	TRUE	0.258	0.258	TRUE
chrIII_27658_TAAAAAAA_TAA,TAAAAAAAA_+	YCL055W_chrIII_27658_TAAAAAAA_TAA,TAAAAAAAA_72_2	0.038795	-0.76921	0.138938	0.891167	0.96385	-6.16726	UpStream	YCL055W	YCL055W	1	TRUE	+	1	73	1	chrIII	27658	TAAAAAAA	TAA	FALSE	-5	-5	0	0	0	0	0	0.187	5.84202	FALSE	0.0203422	0.0148162	9	473	105	31	TRUE	TRUE	FALSE	271	3.59	TRUE	0.187	NA	NA
chrIII_50477_T_G_-	YCL043C_chrIII_50477_T_G_72_2	-0.29876	1.99097	-1.70542	0.106722	0.37547	-4.70327	UpStream	YCL043C	YCL043C	1	TRUE	-	1	73	1	chrIII	50477	T	G	TRUE	0	0	0	1	-1	0	0	0.627	9.39956	TRUE	NA	NA	34	693	326	138	FALSE	TRUE	TRUE	256	NA	FALSE	0.373	0.627	TRUE
chrIII_50543_T_A_-	YCL043C_chrIII_50543_T_A_72_2	-0.0346883	1.5542	-0.127088	0.900395	0.967613	-5.86521	UpStream	YCL043C	YCL043C	1	TRUE	-	1	73	1	chrIII	50543	T	A	TRUE	0	1	0	0	-1	0	0	0.847	9.39956	TRUE	NA	NA	34	693	326	138	FALSE	TRUE	TRUE	322	NA	FALSE	0.153	0.153	FALSE
chrIII_50551_AAC_A_-	YCL043C_chrIII_50551_AAC_A_72_2	-1.02747	0.663063	-2.47694	0.0243178	0.166172	-3.27071	UpStream	YCL043C	YCL043C	1	TRUE	-	1	74	1	chrIII	50551	AAC	A	FALSE	-2	-1	-1	0	0	0	0	0.25	9.39956	TRUE	NA	NA	34	693	326	138	FALSE	TRUE	TRUE	330	1.11	TRUE	0.25	NA	NA
chrIII_50560_C_T_-	YCL043C_chrIII_50560_C_T_72_2	0.240897	0.166484	2.13202	0.0482305	0.249385	-4.46529	UpStream	YCL043C	YCL043C	1	TRUE	-	1	73	1	chrIII	50560	C	T	TRUE	0	0	-1	0	1	0	0	0.845	9.39956	TRUE	NA	NA	34	693	326	138	FALSE	TRUE	TRUE	339	1.11	TRUE	0.155	0.155	FALSE
chrIII_50669_G_GC_+	YCL040W_chrIII_50669_G_GC_72_2	-0.571828	0.60882	-4.59234	0.000273422	0.00783285	0.0914213	UpStream	YCL040W	YCL040W	1	TRUE	+	1	73	1	chrIII	50669	G	GC	FALSE	1	0	1	0	0	0	0	0.514	7.47982	FALSE	NA	NA	23	469	67	21	FALSE	TRUE	TRUE	169	1.11	TRUE	0.486	0.514	TRUE
chrIII_50675_T_C_+	YCL040W_chrIII_50675_T_C_72_2	0.126205	0.959601	0.283288	0.780452	0.93023	-5.48525	UpStream	YCL040W	YCL040W	1	TRUE	+	1	73	1	chrIII	50675	T	C	TRUE	0	0	1	0	-1	0	0	0.864	7.47982	FALSE	NA	NA	23	469	67	21	FALSE	TRUE	TRUE	163	1.11	TRUE	0.136	0.136	FALSE
chrIII_57303_A_G_-	YCL038C_chrIII_57303_A_G_72_2	-0.395804	0.175079	-3.34776	0.00391057	0.0553049	-1.98306	UpStream	YCL038C	YCL038C	1	TRUE	-	1	73	1	chrIII	57303	A	G	TRUE	0	-1	0	1	0	0	0	0.988	4.51917	FALSE	0.0757218	0.0555514	2	673	249	89	FALSE	FALSE	FALSE	776	4.41	TRUE	0.012	0.012	FALSE
chrIII_61460_TG_T_+	YCL034W_5UTR_0_21	0.189218	-0.875531	1.50974	0.141432	0.408805	-5.44023	TSS	YCL034W	YCL034W	1	TRUE	+	2	3	1	chrIII	61460	TG	T	FALSE	-1	0	0	-1	0	0	-1	0.002967	7.0536	FALSE	0.0526372	0.0423594	12	938	125	31	FALSE	FALSE	FALSE	198	2.45	TRUE	0.002967	0.002967	TRUE
chrIII_61462_T_C_+	YCL034W_5UTR_0_12	0.169274	-0.895346	1.37278	0.179862	0.464127	-5.61926	TSS	YCL034W	YCL034W	1	TRUE	+	2	5	2	chrIII	61462	T	C	TRUE	0	0	1	0	-1	0	0	0.002967	7.0536	FALSE	0.0526372	0.0423594	12	938	125	31	FALSE	FALSE	FALSE	196	NA	FALSE	0.002967	0.002967	TRUE
chrIII_74074_T_C_-	YCL026C-B_5UTR_0_21	-0.0797537	-1.15047	-0.842467	0.406104	0.69321	-6.52304	TSS	YCL026C-B	YCL026C-B	1	TRUE	-	2	92	1	chrIII	74074	T	C	TRUE	0	0	1	0	-1	0	1	0.973	7.98857	FALSE	NA	NA	2	107	62	33	FALSE	FALSE	FALSE	88	5.34	TRUE	0.027	0.027	FALSE
chrIII_74146_C_G_-	YCL026C-B_5UTR_0_12	2.00813	-0.106271	23.8557	3.03298e-21	4.60254e-18	37.1241	TSS	YCL026C-B	YCL026C-B	1	TRUE	-	2	20	2	chrIII	74146	C	G	TRUE	0	0	-1	1	0	0	0	0.401	7.98857	FALSE	NA	NA	2	107	62	33	FALSE	FALSE	FALSE	160	NA	FALSE	0.401	0.401	TRUE
chrIII_74562_G_T_-	YCL026C-B_chrIII_74562_G_T_72_2	-0.0877463	-1.21354	-0.754153	0.461303	0.771255	-6.35626	UpStream	YCL026C-B	YCL026C-B	1	TRUE	-	1	73	1	chrIII	74562	G	T	TRUE	0	0	0	-1	1	0	0	0.66	7.98857	FALSE	NA	NA	2	107	62	33	FALSE	FALSE	FALSE	576	NA	FALSE	0.34	0.66	TRUE
chrIII_75503_C_T_-	YCL026C-A_5UTR_0_2	-0.0834716	-1.45861	-0.910764	0.369584	0.662559	-7.05235	TSS	YCL026C-A	YCL026C-A	1	TRUE	-	1	4	1	chrIII	75503	C	T	TRUE	0	0	-1	0	1	0	0	0.257	1.60114	FALSE	NA	NA	3	785	270	83	FALSE	FALSE	FALSE	218	NA	FALSE	0.257	0.257	TRUE
chrIII_83118_T_G_+	YCL021W-A_chrIII_83118_T_G_72_2	0.0828067	-0.728295	0.512702	0.614902	0.857995	-6.56037	UpStream	YCL021W-A	YCL021W-A	1	TRUE	+	1	73	1	chrIII	83118	T	G	TRUE	0	0	0	1	-1	0	1	0.571	3.10342	FALSE	NA	NA	5	NA	NA	NA	FALSE	FALSE	FALSE	502	2.35	TRUE	0.429	NA	NA
chrIII_83421_C_T_+	YCL021W-A_chrIII_83421_C_T_72_2	-0.223288	-0.820804	-1.27726	0.219054	0.54788	-5.54456	UpStream	YCL021W-A	YCL021W-A	1	TRUE	+	1	73	1	chrIII	83421	C	T	TRUE	0	0	-1	0	1	0	0	0.577	3.10342	FALSE	NA	NA	5	NA	NA	NA	FALSE	FALSE	FALSE	199	0.86	TRUE	0.423	0.577	TRUE
chrIII_91287_A_AATAT_+	YCL018W_5UTR_0_2	-0.00689305	-0.261156	-0.0583201	0.953875	0.986711	-6.63716	TSS	YCL018W	YCL018W	1	TRUE	+	1	136	1	chrIII	91287	A	AATAT	FALSE	4	2	0	0	2	2	0	NA	8.99757	FALSE	NA	NA	5	NA	NA	NA	FALSE	FALSE	FALSE	37	NA	FALSE	NA	NA	NA
chrIII_94376_T_C_-	YCL017C_chrIII_94376_T_C_72_2	0.142711	-0.758593	1.3804	0.185738	0.50285	-5.91658	UpStream	YCL017C	YCL017C	1	TRUE	-	1	73	1	chrIII	94376	T	C	TRUE	0	0	1	0	-1	0	0	0.429	6.53048	TRUE	NA	NA	16	974	697	399	FALSE	TRUE	FALSE	106	1.85	TRUE	0.429	0.429	TRUE
chrIII_94470_T_G_-	YCL017C_chrIII_94470_T_G_72_2	1.02203	-0.548352	4.7787	0.000184985	0.00590499	0.938565	UpStream	YCL017C	YCL017C	1	TRUE	-	1	73	1	chrIII	94470	T	G	TRUE	0	0	0	1	-1	0	0	0.994	6.53048	TRUE	NA	NA	16	974	697	399	FALSE	TRUE	FALSE	200	NA	FALSE	0.006	0.006	FALSE
chrIII_94503_AAT_A_-	YCL017C_chrIII_94503_AAT_A_72_2	0.318658	0.470533	2.87278	0.0107278	0.103548	-2.90758	UpStream	YCL017C	YCL017C	1	TRUE	-	1	74	1	chrIII	94503	AAT	A	FALSE	-2	-1	0	0	-1	-1	0	0.665	6.53048	TRUE	NA	NA	16	974	697	399	FALSE	TRUE	FALSE	233	NA	FALSE	0.335	0.335	FALSE
chrIII_94554_G_A_-	YCL017C_chrIII_94554_G_A_72_2	-0.663114	-2.4793	-3.12901	0.00623957	0.0753639	-2.25516	UpStream	YCL017C	YCL017C	1	TRUE	-	1	73	1	chrIII	94554	G	A	TRUE	0	1	0	-1	0	0	1	0.611	6.53048	TRUE	NA	NA	16	974	697	399	FALSE	TRUE	FALSE	284	2.96	TRUE	0.389	0.611	TRUE
chrIII_94573_G_A_-	YCL017C_chrIII_94573_G_A_72_2	0.0193368	-2.53669	0.176629	0.861933	0.954365	-6.70702	UpStream	YCL017C	YCL017C	1	TRUE	-	1	73	1	chrIII	94573	G	A	TRUE	0	1	0	-1	0	0	0	0.608	6.53048	TRUE	NA	NA	16	974	697	399	FALSE	TRUE	FALSE	303	2.96	TRUE	0.392	0.608	TRUE
chrIII_94591_C_G_-	YCL017C_chrIII_94591_C_G_72_2	0.129856	-1.47363	1.37501	0.18737	0.504735	-5.87936	UpStream	YCL017C	YCL017C	1	TRUE	-	1	73	1	chrIII	94591	C	G	TRUE	0	0	-1	1	0	0	0	0.614	6.53048	TRUE	NA	NA	16	974	697	399	FALSE	TRUE	FALSE	321	2.96	TRUE	0.386	0.386	FALSE
chrIII_95776_T_C_+	YCL014W_chrIII_95776_T_C_72_2	0.00704976	-1.25833	0.0545696	0.957132	0.984626	-6.64608	UpStream	YCL014W	YCL014W	1	TRUE	+	1	73	1	chrIII	95776	T	C	TRUE	0	0	1	0	-1	0	0	0.718	3.94126	FALSE	0.211478	0.160188	43	367	104	35	FALSE	FALSE	FALSE	505	2.73	TRUE	0.282	0.282	FALSE
chrIII_95815_C_T_-	YCL016C_5UTR_0_2	0.315288	-1.25602	1.77978	0.0851099	0.311591	-4.69461	TSS	YCL016C	YCL016C	1	TRUE	-	1	122	1	chrIII	95815	C	T	TRUE	0	0	-1	0	1	0	-1	0.953	4.9559	FALSE	0.105553	0.0774601	8	1407	639	328	FALSE	FALSE	FALSE	52	NA	FALSE	0.047	0.047	FALSE
chrIII_95815_C_T_+	YCL014W_chrIII_95815_C_T_72_2	-1.3874	-1.03349	-4.14005	0.000714047	0.015876	-0.402518	UpStream	YCL014W	YCL014W	1	TRUE	+	1	73	1	chrIII	95815	C	T	TRUE	0	0	-1	0	1	0	0	0.953	3.94126	FALSE	0.211478	0.160188	43	367	104	35	FALSE	FALSE	FALSE	466	NA	FALSE	0.047	0.047	FALSE
chrIII_95935_A_C_+	YCL014W_chrIII_95935_A_C_72_2	0.15486	-0.884361	1.49011	0.154915	0.455188	-5.70814	UpStream	YCL014W	YCL014W	1	TRUE	+	1	73	1	chrIII	95935	A	C	TRUE	0	-1	1	0	0	0	0	0.606	3.94126	FALSE	0.211478	0.160188	43	367	104	35	FALSE	FALSE	FALSE	346	6.13	TRUE	0.394	0.606	TRUE
chrIII_95946_C_G_+	YCL014W_chrIII_95946_C_G_72_2	0.0810664	-0.857784	1.09145	0.290635	0.626567	-6.28142	UpStream	YCL014W	YCL014W	1	TRUE	+	1	73	1	chrIII	95946	C	G	TRUE	0	0	-1	1	0	0	0	0.591	3.94126	FALSE	0.211478	0.160188	43	367	104	35	FALSE	FALSE	FALSE	335	6.13	TRUE	0.409	0.591	TRUE
chrIII_95967_G_T_+	YCL014W_chrIII_95967_G_T_72_2	-0.157709	-0.930454	-1.53719	0.143055	0.439088	-5.70427	UpStream	YCL014W	YCL014W	1	TRUE	+	1	73	1	chrIII	95967	G	T	TRUE	0	0	0	-1	1	0	0	0.819	3.94126	FALSE	0.211478	0.160188	43	367	104	35	FALSE	FALSE	FALSE	314	6.13	TRUE	0.181	0.181	FALSE
chrIII_95967_G_T_-	YCL016C_chrIII_95967_G_T_72_2	-0.063313	-1.32326	-0.473049	0.642327	0.870819	-6.46997	UpStream	YCL016C	YCL016C	1	TRUE	-	1	73	1	chrIII	95967	G	T	TRUE	0	0	0	-1	1	0	0	0.819	4.9559	FALSE	0.105553	0.0774601	8	1407	639	328	FALSE	FALSE	FALSE	204	6.13	TRUE	0.181	0.181	FALSE
chrIII_96019_A_G_-	YCL016C_chrIII_96019_A_G_72_2	-0.291863	0.097163	-3.10342	0.00658864	0.0773653	-2.61692	UpStream	YCL016C	YCL016C	1	TRUE	-	1	73	1	chrIII	96019	A	G	TRUE	0	-1	0	1	0	0	0	0.809	4.9559	FALSE	0.105553	0.0774601	8	1407	639	328	FALSE	FALSE	FALSE	256	NA	FALSE	0.191	0.191	FALSE
chrIII_96019_A_G_+	YCL014W_chrIII_96019_A_G_72_2	-0.0665299	-0.107415	-0.829662	0.41848	0.742138	-6.38016	UpStream	YCL014W	YCL014W	1	TRUE	+	1	73	1	chrIII	96019	A	G	TRUE	0	-1	0	1	0	0	0	0.809	3.94126	FALSE	0.211478	0.160188	43	367	104	35	FALSE	FALSE	FALSE	262	NA	FALSE	0.191	0.191	FALSE
chrIII_96055_A_G_+	YCL014W_chrIII_96055_A_G_72_2	0.0581536	-0.403511	0.944045	0.358661	0.691183	-6.40797	UpStream	YCL014W	YCL014W	1	TRUE	+	1	73	1	chrIII	96055	A	G	TRUE	0	-1	0	1	0	0	0	0.962	3.94126	FALSE	0.211478	0.160188	43	367	104	35	FALSE	FALSE	FALSE	226	NA	FALSE	0.038	0.038	FALSE
chrIII_105664_T_TGTTTTCG_-	YCL009C_5UTR_0_2	0.152	1.51692	2.25236	0.0316698	0.179996	-4.63612	TSS	YCL009C	YCL009C	1	TRUE	-	1	42	1	chrIII	105664	T	TGTTTTCG	FALSE	7	0	1	2	4	0	0	0.975	8.89742	FALSE	0.0287236	0.0174437	21	950	240	57	FALSE	FALSE	FALSE	116	NA	FALSE	0.025	0.025	FALSE
chrIII_114986_G_A_+	YCR001W_chrIII_114986_G_A_72_2	0.0750252	-0.866956	0.56283	0.58106	0.838075	-6.55983	UpStream	YCR001W	YCR001W	1	TRUE	+	1	73	1	chrIII	114986	G	A	TRUE	0	1	0	-1	0	0	0	0.985	NA	FALSE	NA	NA	NA	557	31	4	FALSE	FALSE	FALSE	699	3.39	TRUE	0.015	0.015	FALSE
chrIII_137654_G_T_+	YCR012W_5UTR_0_2	0.037496	-0.145763	0.297307	0.768254	0.907728	-6.46406	TSS	YCR012W	YCR012W	1	TRUE	+	1	93	1	chrIII	137654	G	T	TRUE	0	0	0	-1	1	0	0	0.439	11.5526	TRUE	0.100468	0.0113448	73	NA	NA	NA	FALSE	TRUE	FALSE	92	NA	FALSE	0.439	0.439	TRUE
chrIII_149289_G_T_-	YCR018C_chrIII_149289_G_T_72_2	-0.428346	-1.342	-2.23091	0.0397659	0.222756	-4.27425	UpStream	YCR018C	YCR018C	1	TRUE	-	1	73	1	chrIII	149289	G	T	TRUE	0	0	0	-1	1	0	0	0.289	2.6087	FALSE	NA	NA	1	NA	NA	NA	TRUE	FALSE	FALSE	386	NA	FALSE	0.289	0.289	TRUE
chrIII_152546_A_G_+	YCR019W_5UTR_0_2	0.337375	-1.11755	2.54075	0.016395	0.123165	-3.7202	TSS	YCR019W	YCR019W	1	TRUE	+	1	2	1	chrIII	152546	A	G	TRUE	0	-1	0	1	0	0	0	0.99	4.9114	FALSE	NA	NA	1	674	87	20	FALSE	FALSE	FALSE	291	0.38	TRUE	0.01	0.01	FALSE
chrIII_158141_C_T_-	YCR022C_5UTR_0_2	-0.592883	-1.44387	-1.46775	0.152442	0.427137	-5.23372	TSS	YCR022C	YCR022C	1	TRUE	-	1	33	1	chrIII	158141	C	T	TRUE	0	0	-1	0	1	0	0	0.97	NA	FALSE	NA	NA	NA	443	45	8	FALSE	FALSE	FALSE	376	2.2	TRUE	0.03	0.03	FALSE
chrIII_162361_T_C_-	YCR024C_5UTR_0_2	-0.0997622	0.671443	-0.679767	0.501795	0.758817	-5.92461	TSS	YCR024C	YCR024C	1	TRUE	-	1	25	1	chrIII	162361	T	C	TRUE	0	0	1	0	-1	0	-1	NA	4.07868	FALSE	NA	NA	12	570	317	131	FALSE	TRUE	FALSE	139	6.99	TRUE	NA	NA	NA
chrIII_162941_C_A_-	YCR024C-B_5UTR_0_2	0.113897	-0.585136	0.72233	0.47561	0.743677	-6.42986	TSS	YCR024C-B	YCR024C-B	1	TRUE	-	1	80	1	chrIII	162941	C	A	TRUE	0	1	-1	0	0	0	1	0.512	9.35376	FALSE	NA	NA	2	102	74	32	FALSE	FALSE	FALSE	76	2.87	TRUE	0.488	0.512	TRUE
chrIII_163395_GAA_GA_-	YCR024C-A_chrIII_163395_GAA_GA_72_2	-0.185336	-0.717072	-1.60089	0.128223	0.413359	-5.37205	UpStream	YCR024C-A	YCR024C-A	1	TRUE	-	1	74	1	chrIII	163395	GAA	GA	FALSE	-1	-1	0	0	0	0	0	0.716	9.2323	FALSE	NA	NA	25	535	87	22	FALSE	FALSE	TRUE	328	1.08	TRUE	0.284	NA	NA
chrIII_169315_T_A_-	tQ(UUG)C_chrIII_169315_T_A_72_2	-0.0795121	-1.5095	-0.587892	0.564503	0.830865	-6.49231	UpStream	tQ(UUG)C	tQ(UUG)C	1	TRUE	-	1	73	1	chrIII	169315	T	A	TRUE	0	1	0	0	-1	0	0	NA	NA	FALSE	NA	NA	NA	NA	NA	NA	FALSE	FALSE	FALSE	943	3.19	TRUE	NA	NA	NA
chrIII_178367_G_A_-	YCR031C_5UTR_0_2	-0.106317	0.0283598	-1.40261	0.170861	0.452895	-5.62641	TSS	YCR031C	YCR031C	1	TRUE	-	1	19	1	chrIII	178367	G	A	TRUE	0	1	0	-1	0	0	0	0.471	11.1142	FALSE	NA	NA	38	1253	416	155	FALSE	TRUE	TRUE	147	NA	FALSE	0.471	0.471	TRUE
chrIII_193066_A_G_-	YCR035C_5UTR_0_21	0.452845	0.256205	1.45485	0.155956	0.431475	-4.79006	TSS	YCR035C	YCR035C	1	TRUE	-	2	115	1	chrIII	193066	A	G	TRUE	0	-1	0	1	0	0	0	0.513	6.49925	TRUE	0.0814021	0.0590598	30	369	201	105	FALSE	FALSE	FALSE	48	3.47	TRUE	0.487	0.513	TRUE
chrIII_193107_C_A_+	YCR036W_chrIII_193107_C_A_72_2	0.000499854	0.804436	0.00509345	0.995997	0.998437	-6.48617	UpStream	YCR036W	YCR036W	1	TRUE	+	1	73	1	chrIII	193107	C	A	TRUE	0	1	-1	0	0	0	1	0.993	6.6857	FALSE	NA	NA	4	555	163	52	FALSE	TRUE	FALSE	190	3.59	TRUE	0.007	0.007	FALSE
chrIII_193107_C_A_-	YCR035C_5UTR_0_12	-0.0206127	-0.0924093	-0.074925	0.940765	0.979971	-5.85293	TSS	YCR035C	YCR035C	1	TRUE	-	2	74	2	chrIII	193107	C	A	TRUE	0	1	-1	0	0	0	0	0.993	6.49925	TRUE	0.0814021	0.0590598	30	369	201	105	FALSE	FALSE	FALSE	89	3.59	TRUE	0.007	0.007	FALSE
chrIII_197306_T_C_-	YCR037C_5UTR_0_2	-0.177486	-0.741706	-2.35806	0.0249912	0.160696	-4.39234	TSS	YCR037C	YCR037C	1	TRUE	-	1	58	1	chrIII	197306	T	C	TRUE	0	0	1	0	-1	0	0	0.263	5.30122	FALSE	NA	NA	5	511	89	19	FALSE	FALSE	TRUE	121	NA	FALSE	0.263	0.263	TRUE
chrIII_199081_G_A_+	YCR038W-A_chrIII_199081_G_A_72_2	0.0844163	-0.554196	0.858403	0.402873	0.733974	-6.24829	UpStream	YCR038W-A	YCR038W-A	1	TRUE	+	1	73	1	chrIII	199081	G	A	TRUE	0	1	0	-1	0	0	0	NA	NA	FALSE	NA	NA	NA	NA	NA	NA	FALSE	FALSE	FALSE	212	3.85	TRUE	NA	NA	NA
chrIII_210472_ATTC_A_+	YCR047W-A_chrIII_210472_ATTC_A_72_2	0.0116209	0.0386684	0.156011	0.877902	0.957834	-6.86289	UpStream	YCR047W-A	YCR047W-A	1	TRUE	+	1	71	1	chrIII	210472	ATTC	A	FALSE	-3	0	-1	0	-2	0	0	0.486	NA	FALSE	NA	NA	NA	NA	NA	NA	FALSE	FALSE	FALSE	829	4.64	TRUE	0.486	0.514	FALSE
chrIII_211722_GAA_GAAAA_-	YCR047C_5UTR_0_2	-0.0795695	0.912193	-0.580263	0.566013	0.806352	-6.05579	TSS	YCR047C	YCR047C	1	TRUE	-	1	34	1	chrIII	211722	GAA	GAAAA	FALSE	2	2	0	0	0	0	0	0.226	6.86278	FALSE	NA	NA	13	NA	NA	NA	FALSE	TRUE	FALSE	177	0.88	TRUE	0.226	NA	NA
chrIII_211772_G_A_+	YCR048W_chrIII_211772_G_A_72_2	0.200668	-1.24118	2.1441	0.0471144	0.246551	-4.60171	UpStream	YCR048W	YCR048W	1	TRUE	+	1	73	1	chrIII	211772	G	A	TRUE	0	1	0	-1	0	0	0	0.382	4.79463	FALSE	0.0764203	0.0607397	26	754	278	100	FALSE	TRUE	TRUE	157	0.88	TRUE	0.382	0.382	TRUE
chrIII_236451_G_A_-	YCR067C_5UTR_0_2	0.232735	-0.697789	1.42672	0.163848	0.444397	-5.22483	TSS	YCR067C	YCR067C	1	TRUE	-	1	135	1	chrIII	236451	G	A	TRUE	0	1	0	-1	0	0	0	0.617	5.09209	FALSE	0.381171	0.285494	6	892	240	78	FALSE	FALSE	TRUE	129	NA	FALSE	0.383	0.617	TRUE
chrIII_236789_T_C_-	YCR067C_chrIII_236789_T_C_72_2	0.411382	-0.756072	3.85545	0.00131407	0.0259848	-0.986381	UpStream	YCR067C	YCR067C	1	TRUE	-	1	73	1	chrIII	236789	T	C	TRUE	0	0	1	0	-1	0	0	0.518	5.09209	FALSE	0.381171	0.285494	6	892	240	78	FALSE	FALSE	TRUE	467	1.33	TRUE	0.482	0.518	TRUE
chrIII_236969_A_G_+	YCR068W_5UTR_0_21	-0.147852	-0.254669	-1.82263	0.0782064	0.299869	-5.37359	TSS	YCR068W	YCR068W	1	TRUE	+	2	54	1	chrIII	236969	A	G	TRUE	0	-1	0	1	0	0	0	0.576	4.64986	FALSE	0.122132	0.0905861	6	1009	485	237	FALSE	FALSE	FALSE	245	NA	FALSE	0.424	0.576	TRUE
chrIII_237018_A_G_+	YCR068W_5UTR_0_12	-0.00126083	-0.175034	-0.0166252	0.986844	0.994915	-7.05409	TSS	YCR068W	YCR068W	1	TRUE	+	2	103	2	chrIII	237018	A	G	TRUE	0	-1	0	1	0	0	1	0.586	4.64986	FALSE	0.122132	0.0905861	6	1009	485	237	FALSE	FALSE	FALSE	196	NA	FALSE	0.414	0.586	TRUE
chrIII_242407_A_G_-	YCR072C_5UTR_0_211	-0.068652	0.432898	-0.392812	0.697199	0.879322	-5.84318	TSS	YCR072C	YCR072C	1	TRUE	-	3	116	1	chrIII	242407	A	G	TRUE	0	-1	0	1	0	0	0	0.667	6.07843	TRUE	0.0241117	0.0154202	45	596	191	51	FALSE	TRUE	FALSE	55	7.72	TRUE	0.333	0.667	TRUE
chrIII_242447_ATTTT_ATT_-	YCR072C_5UTR_0_121	-0.375684	0.251892	-2.11901	0.042365	0.219791	-4.00703	TSS	YCR072C	YCR072C	1	TRUE	-	3	76	2	chrIII	242447	ATTTT	ATT	FALSE	-2	0	0	0	-2	0	0	0.361	6.07843	TRUE	0.0241117	0.0154202	45	596	191	51	FALSE	TRUE	FALSE	95	7.01	TRUE	0.361	NA	NA
chrIII_242483_G_A_-	YCR072C_5UTR_0_112	0.0561142	0.488323	0.358775	0.722243	0.887452	-5.87915	TSS	YCR072C	YCR072C	1	TRUE	-	3	40	3	chrIII	242483	G	A	TRUE	0	1	0	-1	0	0	0	0.763	6.07843	TRUE	0.0241117	0.0154202	45	596	191	51	FALSE	TRUE	FALSE	131	7.01	TRUE	0.237	0.237	FALSE
chrIII_246789_C_A_-	YCR073C_5UTR_0_2	-0.118486	-1.14722	-1.20904	0.235967	0.529222	-6.25875	TSS	YCR073C	YCR073C	1	TRUE	-	1	4	1	chrIII	246789	C	A	TRUE	0	1	-1	0	0	0	0	0.694	3.28321	FALSE	NA	NA	33	820	101	30	FALSE	TRUE	TRUE	206	2.44	TRUE	0.306	0.306	FALSE
chrIII_246813_T_G_+	YCR073W-A_5UTR_0_211	-0.0839921	-1.1427	-0.412329	0.682991	0.872334	-6.14241	TSS	YCR073W-A	YCR073W-A	1	TRUE	+	3	13	1	chrIII	246813	T	G	TRUE	0	0	0	1	-1	0	-1	0.878	6.17798	FALSE	0.0290793	0.0227309	29	862	150	38	FALSE	TRUE	TRUE	150	NA	FALSE	0.122	0.122	FALSE
chrIII_246818_T_A_+	YCR073W-A_5UTR_0_121	-0.263152	-1.21647	-1.01281	0.319144	0.614242	-5.64484	TSS	YCR073W-A	YCR073W-A	1	TRUE	+	3	18	2	chrIII	246818	T	A	TRUE	0	1	0	0	-1	0	0	0.749	6.17798	FALSE	0.0290793	0.0227309	29	862	150	38	FALSE	TRUE	TRUE	145	NA	FALSE	0.251	0.251	FALSE
chrIII_246818_T_A_-	YCR073C_chrIII_246818_T_A_72_2	0.132189	-0.363329	1.46488	0.161603	0.468051	-5.68368	UpStream	YCR073C	YCR073C	1	TRUE	-	1	73	1	chrIII	246818	T	A	TRUE	0	1	0	0	-1	0	0	0.749	3.28321	FALSE	NA	NA	33	820	101	30	FALSE	TRUE	TRUE	235	NA	FALSE	0.251	0.251	FALSE
chrIII_246853_G_A_+	YCR073W-A_5UTR_0_112	-0.0577388	-1.13024	-0.271486	0.787852	0.916142	-6.22114	TSS	YCR073W-A	YCR073W-A	1	TRUE	+	3	53	3	chrIII	246853	G	A	TRUE	0	1	0	-1	0	0	0	0.967	6.17798	FALSE	0.0290793	0.0227309	29	862	150	38	FALSE	TRUE	TRUE	110	NA	FALSE	0.033	0.033	FALSE
chrIII_248847_G_GTT_-	YCR075C_5UTR_0_21	0.044325	-0.808359	0.261563	0.795422	0.91809	-6.3705	TSS	YCR075C	YCR075C	1	TRUE	-	2	123	1	chrIII	248847	G	GTT	FALSE	2	0	0	0	2	0	0	0.496	5.39151	FALSE	0.103506	0.0797332	10	939	306	103	FALSE	TRUE	FALSE	32	NA	FALSE	0.496	0.496	TRUE
chrIII_248847_G_GTT_+	YCR075W-A_5UTR_0_21	0.0630798	-0.361533	0.827005	0.414677	0.700095	-6.52699	TSS	YCR075W-A	YCR075W-A	1	TRUE	+	2	31	1	chrIII	248847	G	GTT	FALSE	2	0	0	0	2	0	0	0.496	6.20021	FALSE	NA	NA	1	583	146	57	FALSE	FALSE	TRUE	128	NA	FALSE	0.496	0.496	TRUE
chrIII_248853_C_T_+	YCR075W-A_5UTR_0_12	0.00168804	-0.395876	0.0223257	0.982334	0.994656	-6.86843	TSS	YCR075W-A	YCR075W-A	1	TRUE	+	2	37	2	chrIII	248853	C	T	TRUE	0	0	-1	0	1	0	0	0.632	6.20021	FALSE	NA	NA	1	583	146	57	FALSE	FALSE	TRUE	122	NA	FALSE	0.368	0.368	FALSE
chrIII_254180_C_T_+	YCR081W_chrIII_254180_C_T_72_2	-0.204304	-0.68508	-2.37596	0.0298126	0.188448	-4.19066	UpStream	YCR081W	YCR081W	1	TRUE	+	1	73	1	chrIII	254180	C	T	TRUE	0	0	-1	0	1	0	0	0.652	3.21522	FALSE	0.0843695	0.0596964	23	NA	NA	NA	FALSE	FALSE	FALSE	191	5.1	TRUE	0.348	NA	NA
chrIII_258780_T_G_+	YCR082W_5UTR_0_2111	0.335054	0.674529	7.4621	2.35948e-08	2.31e-06	8.89411	TSS	YCR082W	YCR082W	1	TRUE	+	4	72	1	chrIII	258780	T	G	TRUE	0	0	0	1	-1	0	0	0.963	7.73307	FALSE	0.142216	0.101842	28	922	150	43	FALSE	FALSE	FALSE	103	1.59	TRUE	0.037	0.037	FALSE
chrIII_258781_T_C_+	YCR082W_5UTR_0_1211	-0.14747	0.434844	-3.13983	0.00374599	0.0475694	-2.91587	TSS	YCR082W	YCR082W	1	TRUE	+	4	73	2	chrIII	258781	T	C	TRUE	0	0	1	0	-1	0	0	0.561	7.73307	FALSE	0.142216	0.101842	28	922	150	43	FALSE	FALSE	FALSE	102	1.59	TRUE	0.439	0.561	TRUE
chrIII_258828_GT_G_+	YCR082W_5UTR_0_1121	-0.0197224	0.497599	-0.434066	0.667305	0.865086	-7.2216	TSS	YCR082W	YCR082W	1	TRUE	+	4	120	3	chrIII	258828	GT	G	FALSE	-1	0	0	0	-1	0	0	0.554	7.73307	FALSE	0.142216	0.101842	28	922	150	43	FALSE	FALSE	FALSE	55	3.03	TRUE	0.446	0.554	TRUE
chrIII_258847_A_G_+	YCR082W_5UTR_0_1112	0.00668692	0.510705	0.14396	0.886482	0.955763	-7.22362	TSS	YCR082W	YCR082W	1	TRUE	+	4	139	4	chrIII	258847	A	G	TRUE	0	-1	0	1	0	0	0	0.826	7.73307	FALSE	0.142216	0.101842	28	922	150	43	FALSE	FALSE	FALSE	36	3.03	TRUE	0.174	0.174	FALSE
chrIII_259489_A_G_+	YCR083W_chrIII_259489_A_G_72_2	-0.265446	-0.642354	-1.4359	0.169574	0.481095	-5.49571	UpStream	YCR083W	YCR083W	1	TRUE	+	1	73	1	chrIII	259489	A	G	TRUE	0	-1	0	1	0	0	0	0.798	6.89598	FALSE	NA	NA	14	506	64	17	FALSE	FALSE	FALSE	89	NA	FALSE	0.202	0.202	FALSE
chrIII_263282_C_T_+	YCR086W_chrIII_263282_C_T_72_2	0.0759363	-0.634753	0.890893	0.385694	0.717986	-6.37264	UpStream	YCR086W	YCR086W	1	TRUE	+	1	73	1	chrIII	263282	C	T	TRUE	0	0	-1	0	1	0	0	0.658	5.47659	FALSE	0.0416094	0.0333265	71	1692	718	267	FALSE	FALSE	FALSE	110	NA	FALSE	0.342	0.342	FALSE
chrIII_264610_T_C_-	YCR087C-A_chrIII_264610_T_C_72_2	0.273948	0.643749	3.77511	0.00156166	0.0289932	-1.40812	UpStream	YCR087C-A	YCR087C-A	1	TRUE	-	1	73	1	chrIII	264610	T	C	TRUE	0	0	1	0	-1	0	0	0.654	6.74694	FALSE	NA	NA	16	598	82	21	FALSE	FALSE	FALSE	143	1.87	TRUE	0.346	0.654	TRUE
chrIII_264610_T_C_+	YCR088W_chrIII_264610_T_C_72_2	-0.0571711	-0.481842	-0.371117	0.715236	0.908313	-6.29817	UpStream	YCR088W	YCR088W	1	TRUE	+	1	73	1	chrIII	264610	T	C	TRUE	0	0	1	0	-1	0	0	0.654	7.20046	FALSE	NA	NA	45	847	165	60	FALSE	FALSE	FALSE	458	1.87	TRUE	0.346	0.654	TRUE
chrIII_264634_G_A_-	YCR087C-A_chrIII_264634_G_A_72_2	-0.235181	-0.890262	-2.82345	0.0118967	0.110995	-3.37679	UpStream	YCR087C-A	YCR087C-A	1	TRUE	-	1	73	1	chrIII	264634	G	A	TRUE	0	1	0	-1	0	0	0	0.876	6.74694	FALSE	NA	NA	16	598	82	21	FALSE	FALSE	FALSE	167	1.87	TRUE	0.124	0.124	FALSE
chrIII_264634_G_A_+	YCR088W_chrIII_264634_G_A_72_2	0.0804713	-1.08205	0.709116	0.488075	0.790336	-6.38699	UpStream	YCR088W	YCR088W	1	TRUE	+	1	73	1	chrIII	264634	G	A	TRUE	0	1	0	-1	0	0	0	0.876	7.20046	FALSE	NA	NA	45	847	165	60	FALSE	FALSE	FALSE	434	1.87	TRUE	0.124	0.124	FALSE
chrIII_264642_T_C_+	YCR088W_chrIII_264642_T_C_72_2	-0.0743322	-0.912378	-0.361709	0.722124	0.909432	-6.13527	UpStream	YCR088W	YCR088W	1	TRUE	+	1	73	1	chrIII	264642	T	C	TRUE	0	0	1	0	-1	0	0	0.788	7.20046	FALSE	NA	NA	45	847	165	60	FALSE	FALSE	FALSE	426	1.87	TRUE	0.212	0.788	TRUE
chrIII_264642_T_C_-	YCR087C-A_chrIII_264642_T_C_72_2	0.0176288	-0.944869	0.126928	0.900519	0.967613	-6.59268	UpStream	YCR087C-A	YCR087C-A	1	TRUE	-	1	73	1	chrIII	264642	T	C	TRUE	0	0	1	0	-1	0	0	0.788	6.74694	FALSE	NA	NA	16	598	82	21	FALSE	FALSE	FALSE	175	1.87	TRUE	0.212	0.788	TRUE
chrIII_264655_T_C_-	YCR087C-A_chrIII_264655_T_C_72_2	0.206597	-1.23022	1.83631	0.0842535	0.325289	-5.15307	UpStream	YCR087C-A	YCR087C-A	1	TRUE	-	1	73	1	chrIII	264655	T	C	TRUE	0	0	1	0	-1	0	0	0.648	6.74694	FALSE	NA	NA	16	598	82	21	FALSE	FALSE	FALSE	188	1.87	TRUE	0.352	0.648	TRUE
chrIII_264655_T_C_+	YCR088W_chrIII_264655_T_C_72_2	0.2725	-0.950704	2.48396	0.0239741	0.164831	-3.82469	UpStream	YCR088W	YCR088W	1	TRUE	+	1	73	1	chrIII	264655	T	C	TRUE	0	0	1	0	-1	0	0	0.648	7.20046	FALSE	NA	NA	45	847	165	60	FALSE	FALSE	FALSE	413	1.87	TRUE	0.352	0.648	TRUE
chrIII_264887_T_C_+	YCR088W_chrIII_264887_T_C_72_2	-0.225001	0.015041	-3.03991	0.00753952	0.0840253	-2.89705	UpStream	YCR088W	YCR088W	1	TRUE	+	1	73	1	chrIII	264887	T	C	TRUE	0	0	1	0	-1	0	0	0.74	7.20046	FALSE	NA	NA	45	847	165	60	FALSE	FALSE	FALSE	181	NA	FALSE	0.26	0.74	TRUE
chrIII_264887_T_C_-	YCR087C-A_chrIII_264887_T_C_72_2	0.315179	-1.13531	3.91958	0.00114505	0.0231549	-1.23736	UpStream	YCR087C-A	YCR087C-A	1	TRUE	-	1	73	1	chrIII	264887	T	C	TRUE	0	0	1	0	-1	0	1	0.74	6.74694	FALSE	NA	NA	16	598	82	21	FALSE	FALSE	FALSE	420	NA	FALSE	0.26	0.74	TRUE
chrIII_265045_C_T_-	YCR087C-A_chrIII_265045_C_T_72_2	0.00151627	-0.989292	0.0114986	0.990962	0.996472	-6.52363	UpStream	YCR087C-A	YCR087C-A	1	TRUE	-	1	73	1	chrIII	265045	C	T	TRUE	0	0	-1	0	1	1	0	0.611	6.74694	FALSE	NA	NA	16	598	82	21	FALSE	FALSE	FALSE	578	2.14	TRUE	0.389	0.611	TRUE
chrIV_32140_TC_T_+	YDL236W_5UTR_0_2	-0.145538	-0.236878	-2.15683	0.0390453	0.210466	-4.79804	TSS	YDL236W	YDL236W	1	TRUE	+	1	4	1	chrIV	32140	TC	T	FALSE	-1	0	-1	0	0	0	0	0.098	7.74061	FALSE	0.0547802	0.0372248	14	851	162	41	FALSE	TRUE	FALSE	156	NA	FALSE	0.098	NA	NA
chrIV_43708_A_T_+	YDL229W_chrIV_43708_A_T_72_2	0.160248	-1.22467	1.30471	0.209758	0.535662	-5.74719	UpStream	YDL229W	YDL229W	1	TRUE	+	1	73	1	chrIV	43708	A	T	TRUE	0	-1	0	0	1	0	0	0.059	10.1835	FALSE	0.173569	0.051208	590	1002	182	53	FALSE	FALSE	TRUE	357	5.04	TRUE	0.059	0.059	TRUE
chrIV_43856_CTTT_CTTTT_+	YDL229W_chrIV_43856_CTTT_CTTTT_72_2	-0.443895	2.30201	-1.44987	0.16569	0.474357	-4.78858	UpStream	YDL229W	YDL229W	1	TRUE	+	1	73	1	chrIV	43856	CTTT	CTTTT	FALSE	1	0	0	0	1	0	0	0.159	10.1835	FALSE	0.173569	0.051208	590	1002	182	53	FALSE	FALSE	TRUE	209	9.52	TRUE	0.159	NA	NA
chrIV_46068_G_C_-	YDL228C_chrIV_46068_G_C_72_2	-0.0929657	-0.521122	-0.242734	0.81118	0.937721	-5.55705	UpStream	YDL228C	YDL228C	1	TRUE	-	1	73	1	chrIV	46068	G	C	TRUE	0	0	1	-1	0	0	0	0.974	1.89056	FALSE	NA	NA	NA	NA	NA	NA	FALSE	FALSE	FALSE	150	0.84	TRUE	0.026	0.026	FALSE
chrIV_66230_T_C_+	YDL218W_chrIV_66230_T_C_72_2	0.0423862	-0.576243	0.482161	0.635976	0.869523	-6.67255	UpStream	YDL218W	YDL218W	1	TRUE	+	1	73	1	chrIV	66230	T	C	TRUE	0	0	1	0	-1	0	0	0.993	1.67352	FALSE	0.0847909	0.0656073	1	414	176	81	FALSE	FALSE	FALSE	263	1.21	TRUE	0.007	0.007	FALSE
chrIV_68860_C_A_-	YDL217C_chrIV_68860_C_A_72_2	0.14915	-0.561747	0.480247	0.637308	0.870153	-5.80443	UpStream	YDL217C	YDL217C	1	TRUE	-	1	73	1	chrIV	68860	C	A	TRUE	0	1	-1	0	0	0	0	0.212	5.7738	TRUE	0.0155432	0.0126141	13	1595	1049	535	FALSE	TRUE	FALSE	254	NA	FALSE	0.212	0.212	TRUE
chrIV_68911_A_C_-	YDL217C_chrIV_68911_A_C_72_2	-0.282974	0.318977	-1.87223	0.0788669	0.311082	-4.46475	UpStream	YDL217C	YDL217C	1	TRUE	-	1	73	1	chrIV	68911	A	C	TRUE	0	-1	1	0	0	0	0	0.185	5.7738	TRUE	0.0155432	0.0126141	13	1595	1049	535	FALSE	TRUE	FALSE	305	NA	FALSE	0.185	0.185	TRUE
chrIV_70378_G_GA_-	YDL216C_5UTR_0_21	0.148688	-0.588858	2.2812	0.0297042	0.174427	-4.76361	TSS	YDL216C	YDL216C	1	TRUE	-	2	105	1	chrIV	70378	G	GA	FALSE	1	1	0	0	0	0	0	0.666	3.75159	FALSE	0.128495	0.102053	12	853	240	89	FALSE	TRUE	FALSE	59	4.06	TRUE	0.334	0.666	TRUE
chrIV_70457_A_G_-	YDL216C_5UTR_0_12	-0.0814131	-0.705643	-1.88925	0.0684277	0.279562	-5.52581	TSS	YDL216C	YDL216C	1	TRUE	-	2	26	2	chrIV	70457	A	G	TRUE	0	-1	0	1	0	0	0	0.706	3.75159	FALSE	0.128495	0.102053	12	853	240	89	FALSE	TRUE	FALSE	138	4.06	TRUE	0.294	0.706	TRUE
chrIV_76735_ATT_AT_-	YDL214C_5UTR_0_211	0.0986771	-1.13099	0.917601	0.366049	0.662559	-6.49908	TSS	YDL214C	YDL214C	1	TRUE	-	3	122	1	chrIV	76735	ATT	AT	FALSE	-1	0	0	0	-1	0	0	0.782	2.40147	FALSE	0.181389	0.1358	42	438	71	15	FALSE	FALSE	TRUE	190	2.84	TRUE	0.218	0.782	TRUE
chrIV_76795_G_C_-	YDL214C_5UTR_0_121	-0.123697	-1.24476	-1.67546	0.1041	0.351158	-5.58265	TSS	YDL214C	YDL214C	1	TRUE	-	3	62	2	chrIV	76795	G	C	TRUE	0	0	1	-1	0	0	0	0.498	2.40147	FALSE	0.181389	0.1358	42	438	71	15	FALSE	FALSE	TRUE	250	NA	FALSE	0.498	0.498	TRUE
chrIV_76825_CAA_CA_-	YDL214C_chrIV_76825_CAA_CA_72_2	0.173949	0.0512688	1.29781	0.212066	0.539079	-5.71425	UpStream	YDL214C	YDL214C	1	TRUE	-	1	74	1	chrIV	76825	CAA	CA	FALSE	-1	-1	0	0	0	0	0	0.88	2.40147	FALSE	0.181389	0.1358	42	438	71	15	FALSE	FALSE	TRUE	280	NA	FALSE	0.12	0.88	TRUE
chrIV_77191_C_CT_-	YDL214C_chrIV_77191_C_CT_72_2	0.215198	-1.52686	1.91515	0.0728335	0.301913	-5.03948	UpStream	YDL214C	YDL214C	1	TRUE	-	1	73	1	chrIV	77191	C	CT	FALSE	1	0	0	0	1	0	0	0.605	2.40147	FALSE	0.181389	0.1358	42	438	71	15	FALSE	FALSE	TRUE	646	NA	FALSE	0.395	0.605	TRUE
chrIV_78181_A_G_-	YDL213C_chrIV_78181_A_G_72_2	0.00692975	-0.760393	0.0613381	0.951821	0.982751	-6.90532	UpStream	YDL213C	YDL213C	1	TRUE	-	1	73	1	chrIV	78181	A	G	TRUE	0	-1	0	1	0	0	0	0.579	7.1499	FALSE	0.0652875	0.0482901	88	989	275	94	FALSE	FALSE	FALSE	215	2.33	TRUE	0.421	0.579	TRUE
chrIV_78264_A_C_+	YDL212W_5UTR_0_2	0.592605	0.665724	2.76467	0.00959094	0.0893194	-2.70545	TSS	YDL212W	YDL212W	1	TRUE	+	1	5	1	chrIV	78264	A	C	TRUE	0	-1	1	0	0	0	-1	0.578	8.2753	TRUE	NA	NA	81	NA	NA	NA	FALSE	FALSE	FALSE	162	0.32	TRUE	0.422	0.578	TRUE
chrIV_80483_A_G_-	YDL211C_5UTR_0_211	-0.0931487	-0.0896443	-0.819945	0.418629	0.703076	-6.06774	TSS	YDL211C	YDL211C	1	TRUE	-	3	143	1	chrIV	80483	A	G	TRUE	0	-1	0	1	0	0	0	0.864	4.23954	FALSE	NA	NA	5	485	115	41	FALSE	FALSE	TRUE	71	2.25	TRUE	0.136	0.136	FALSE
chrIV_80506_T_C_-	YDL211C_5UTR_0_121	-0.082787	-0.0965768	-1.28046	0.210067	0.50201	-6.18618	TSS	YDL211C	YDL211C	1	TRUE	-	3	120	2	chrIV	80506	T	C	TRUE	0	0	1	0	-1	0	0	0.817	4.23954	FALSE	NA	NA	5	485	115	41	FALSE	FALSE	TRUE	94	2.25	TRUE	0.183	0.817	TRUE
chrIV_80612_A_G_-	YDL211C_chrIV_80612_A_G_72_2	0.105807	-0.771692	1.02227	0.321292	0.65986	-6.18635	UpStream	YDL211C	YDL211C	1	TRUE	-	1	73	1	chrIV	80612	A	G	TRUE	0	-1	0	1	0	0	0	0.995	4.23954	FALSE	NA	NA	5	485	115	41	FALSE	FALSE	TRUE	200	NA	FALSE	0.005	0.005	FALSE
chrIV_83082_A_G_+	tG(GCC)D1_chrIV_83082_A_G_72_2	0.0885739	-0.638934	0.966095	0.347837	0.682389	-6.24304	UpStream	tG(GCC)D1	tG(GCC)D1	1	TRUE	+	1	73	1	chrIV	83082	A	G	TRUE	0	-1	0	1	0	0	0	0.626	NA	FALSE	NA	NA	NA	NA	NA	NA	FALSE	FALSE	FALSE	466	1.63	TRUE	0.374	0.626	TRUE
chrIV_83178_G_A_+	tG(GCC)D1_chrIV_83178_G_A_72_2	-0.152874	-1.14998	-1.23667	0.233391	0.565018	-5.69423	UpStream	tG(GCC)D1	tG(GCC)D1	1	TRUE	+	1	73	1	chrIV	83178	G	A	TRUE	0	1	0	-1	0	0	1	0.408	NA	FALSE	NA	NA	NA	NA	NA	NA	FALSE	FALSE	FALSE	370	1.57	TRUE	0.408	0.408	TRUE
chrIV_83418_TTCCAA_T_+	tG(GCC)D1_chrIV_83418_TTCCAA_T_72_2	-0.0126116	-0.690472	-0.0769378	0.939591	0.981038	-6.70643	UpStream	tG(GCC)D1	tG(GCC)D1	1	TRUE	+	1	70	1	chrIV	83418	TTCCAA	T	FALSE	-5	-2	-2	0	-1	0	1	0.421	NA	FALSE	NA	NA	NA	NA	NA	NA	FALSE	FALSE	FALSE	130	2.23	TRUE	0.421	0.579	FALSE
chrIV_87312_C_T_-	YDL209C_5UTR_0_2	-0.0275972	-0.418288	-0.474388	0.638613	0.849222	-7.02878	TSS	YDL209C	YDL209C	1	TRUE	-	1	81	1	chrIV	87312	C	T	TRUE	0	0	-1	0	1	0	0	0.776	5.27325	TRUE	NA	NA	51	462	123	55	FALSE	FALSE	FALSE	86	9.59	TRUE	0.224	0.224	FALSE
chrIV_87483_G_A_-	YDL209C_chrIV_87483_G_A_72_2	-0.181615	-0.357012	-0.861885	0.401008	0.733567	-5.71034	UpStream	YDL209C	YDL209C	1	TRUE	-	1	73	1	chrIV	87483	G	A	TRUE	0	1	0	-1	0	0	0	0.981	5.27325	TRUE	NA	NA	51	462	123	55	FALSE	FALSE	FALSE	257	8.22	TRUE	0.019	0.019	FALSE
chrIV_88140_G_GTT_+	YDL207W_5UTR_0_2	0.356695	-0.29038	2.25656	0.0313762	0.178997	-3.94465	TSS	YDL207W	YDL207W	1	TRUE	+	1	75	1	chrIV	88140	G	GTT	FALSE	2	0	0	0	2	0	0	0.898	5.89027	TRUE	0.0985936	0.0747302	42	1561	786	416	FALSE	TRUE	FALSE	108	NA	FALSE	0.102	0.102	FALSE
chrIV_93990_C_CT_-	YDL205C_5UTR_0_21	-0.211722	0.77171	-2.4256	0.0214221	0.148778	-3.87061	TSS	YDL205C	YDL205C	1	TRUE	-	2	84	1	chrIV	93990	C	CT	FALSE	1	0	0	0	1	0	0	0.534	6.05331	TRUE	0.0257339	0.0167393	5	NA	NA	NA	FALSE	TRUE	FALSE	245	NA	FALSE	0.466	0.534	TRUE
chrIV_94008_T_A_-	YDL205C_5UTR_0_12	-0.186703	0.78756	-1.91566	0.0648534	0.271388	-4.83603	TSS	YDL205C	YDL205C	1	TRUE	-	2	66	2	chrIV	94008	T	A	TRUE	0	1	0	0	-1	0	0	0.45	6.05331	TRUE	0.0257339	0.0167393	5	NA	NA	NA	FALSE	TRUE	FALSE	263	NA	FALSE	0.45	0.45	TRUE
chrIV_94137_T_A_-	YDL205C_chrIV_94137_T_A_72_2	-0.0429321	-0.364632	-0.375504	0.712032	0.907133	-6.61589	UpStream	YDL205C	YDL205C	1	TRUE	-	1	73	1	chrIV	94137	T	A	TRUE	0	1	0	0	-1	0	0	0.56	6.05331	TRUE	0.0257339	0.0167393	5	NA	NA	NA	FALSE	TRUE	FALSE	392	3.57	TRUE	0.44	0.56	TRUE
chrIV_94538_T_G_-	YDL205C_chrIV_94538_T_G_72_2	-0.082331	-1.17965	-0.564436	0.579991	0.838015	-6.28421	UpStream	YDL205C	YDL205C	1	TRUE	-	1	73	1	chrIV	94538	T	G	TRUE	0	0	0	1	-1	0	0	0.926	6.05331	TRUE	0.0257339	0.0167393	5	NA	NA	NA	FALSE	TRUE	FALSE	793	2.9	TRUE	0.074	0.074	FALSE
chrIV_98297_T_A_+	YDL202W_5UTR_0_211	0.0951784	-0.557802	0.432061	0.668746	0.865086	-6.3564	TSS	YDL202W	YDL202W	1	TRUE	+	3	20	1	chrIV	98297	T	A	TRUE	0	1	0	0	-1	0	0	0.619	6.1448	FALSE	0.155858	0.113709	11	483	186	60	FALSE	FALSE	FALSE	178	6.51	TRUE	0.381	0.619	TRUE
chrIV_98322_C_A_-	YDL203C_chrIV_98322_C_A_72_2	0.238463	-0.327223	2.04428	0.0570923	0.26891	-4.4305	UpStream	YDL203C	YDL203C	1	TRUE	-	1	73	1	chrIV	98322	C	A	TRUE	0	1	-1	0	0	0	0	0.331	5.27726	FALSE	0.112518	0.0857233	18	1052	277	120	FALSE	FALSE	FALSE	369	6.51	TRUE	0.331	0.669	FALSE
chrIV_98322_C_A_+	YDL202W_5UTR_0_121	0.386846	-0.435276	3.48581	0.00151477	0.025122	-1.33998	TSS	YDL202W	YDL202W	1	TRUE	+	3	45	2	chrIV	98322	C	A	TRUE	0	1	-1	0	0	0	0	0.331	6.1448	FALSE	0.155858	0.113709	11	483	186	60	FALSE	FALSE	FALSE	153	6.51	TRUE	0.331	0.669	FALSE
chrIV_98345_T_C_+	YDL202W_5UTR_0_112	0.154654	-0.559639	1.39185	0.174065	0.455421	-5.52943	TSS	YDL202W	YDL202W	1	TRUE	+	3	68	3	chrIV	98345	T	C	TRUE	0	0	1	0	-1	0	0	0.619	6.1448	FALSE	0.155858	0.113709	11	483	186	60	FALSE	FALSE	FALSE	130	6.51	TRUE	0.381	0.619	TRUE
chrIV_99245_G_A_+	YDL201W_chrIV_99245_G_A_72_2	0.298382	-1.86926	1.74222	0.0999297	0.358704	-5.09038	UpStream	YDL201W	YDL201W	1	TRUE	+	1	73	1	chrIV	99245	G	A	TRUE	0	1	0	-1	0	0	0	0.613	6.59809	FALSE	0.0380083	0.02598	9	416	72	25	FALSE	TRUE	FALSE	316	0.58	TRUE	0.387	0.613	TRUE
chrIV_99407_GAA_GA_+	YDL201W_5UTR_0_2	-0.11799	0.530205	-0.85363	0.399985	0.691318	-5.96055	TSS	YDL201W	YDL201W	1	TRUE	+	1	8	1	chrIV	99407	GAA	GA	FALSE	-1	-1	0	0	0	0	0	0.452	6.59809	FALSE	0.0380083	0.02598	9	416	72	25	FALSE	TRUE	FALSE	154	NA	FALSE	0.452	NA	NA
chrIV_103421_T_G_-	YDL199C_5UTR_0_2111111	-0.1311	-1.32155	-1.57226	0.12624	0.385501	-5.84128	TSS	YDL199C	YDL199C	1	TRUE	-	7	127	1	chrIV	103421	T	G	TRUE	0	0	0	1	-1	0	0	0.559	2.92185	FALSE	0.123608	0.0939096	13	464	93	31	FALSE	FALSE	FALSE	68	NA	FALSE	0.441	0.559	TRUE
chrIV_103440_G_C_-	YDL199C_5UTR_0_1211111	-0.12077	-1.32366	-1.604	0.119052	0.374816	-5.74342	TSS	YDL199C	YDL199C	1	TRUE	-	7	108	2	chrIV	103440	G	C	TRUE	0	0	1	-1	0	0	0	0.618	2.92185	FALSE	0.123608	0.0939096	13	464	93	31	FALSE	FALSE	FALSE	87	1.3	TRUE	0.382	0.382	FALSE
chrIV_103444_C_T_-	YDL199C_5UTR_0_1121111	0.0275709	-1.249	0.375709	0.709741	0.882814	-6.97208	TSS	YDL199C	YDL199C	1	TRUE	-	7	104	3	chrIV	103444	C	T	TRUE	0	0	-1	0	1	0	0	0.066	2.92185	FALSE	0.123608	0.0939096	13	464	93	31	FALSE	FALSE	FALSE	91	1.3	TRUE	0.066	0.066	TRUE
chrIV_103456_T_C_-	YDL199C_5UTR_0_1112111	-0.169027	-1.34685	-2.26576	0.0307421	0.177044	-4.64131	TSS	YDL199C	YDL199C	1	TRUE	-	7	92	4	chrIV	103456	T	C	TRUE	0	0	1	0	-1	0	0	0.922	2.92185	FALSE	0.123608	0.0939096	13	464	93	31	FALSE	FALSE	FALSE	103	1.3	TRUE	0.078	0.078	FALSE
chrIV_103509_T_C_-	YDL199C_5UTR_0_1111211	0.0826618	-1.21967	0.938379	0.355444	0.652615	-6.58858	TSS	YDL199C	YDL199C	1	TRUE	-	7	39	5	chrIV	103509	T	C	TRUE	0	0	1	0	-1	0	0	0.627	2.92185	FALSE	0.123608	0.0939096	13	464	93	31	FALSE	FALSE	FALSE	156	1.3	TRUE	0.373	0.627	TRUE
chrIV_103532_G_C_-	YDL199C_chrIV_103532_G_C_72_2	-0.263125	-2.06154	-2.21036	0.0414028	0.227289	-4.30956	UpStream	YDL199C	YDL199C	1	TRUE	-	1	73	1	chrIV	103532	G	C	TRUE	0	0	1	-1	0	0	0	0.722	2.92185	FALSE	0.123608	0.0939096	13	464	93	31	FALSE	FALSE	FALSE	179	1.3	TRUE	0.278	NA	NA
chrIV_103533_GA_G_-	YDL199C_5UTR_0_1111112	-0.0870476	-1.30669	-1.10204	0.279093	0.57544	-6.41066	TSS	YDL199C	YDL199C	1	TRUE	-	7	15	7	chrIV	103533	GA	G	FALSE	-1	-1	0	0	0	0	0	0.918	2.92185	FALSE	0.123608	0.0939096	13	464	93	31	FALSE	FALSE	FALSE	180	1.3	TRUE	0.082	NA	NA
chrIV_104599_T_A_-	YDL198C_5UTR_0_2	-0.219736	0.127986	-1.76112	0.088273	0.31856	-4.87311	TSS	YDL198C	YDL198C	1	TRUE	-	1	125	1	chrIV	104599	T	A	TRUE	0	1	0	0	-1	0	0	0.705	7.55077	FALSE	NA	NA	13	NA	NA	NA	FALSE	FALSE	FALSE	48	0.66	TRUE	0.295	0.295	FALSE
chrIV_104877_G_T_-	YDL198C_chrIV_104877_G_T_72_2	0.17703	-1.97279	0.88981	0.386259	0.718348	-5.70045	UpStream	YDL198C	YDL198C	1	TRUE	-	1	73	1	chrIV	104877	G	T	TRUE	0	0	0	-1	1	0	0	0.359	7.55077	FALSE	NA	NA	13	NA	NA	NA	FALSE	FALSE	FALSE	326	0.68	TRUE	0.359	0.359	TRUE
chrIV_111205_A_G_+	YDL194W_chrIV_111205_A_G_72_2	-0.1283	-1.24836	-1.01607	0.32415	0.662117	-6.24508	UpStream	YDL194W	YDL194W	1	TRUE	+	1	73	1	chrIV	111205	A	G	TRUE	0	-1	0	1	0	0	0	0.039	3.31764	FALSE	0.110031	0.0824534	5	637	157	46	FALSE	TRUE	TRUE	375	NA	FALSE	0.039	0.039	TRUE
chrIV_111349_A_G_+	YDL194W_chrIV_111349_A_G_72_2	0.132301	-0.958431	1.05668	0.305768	0.643049	-6.22697	UpStream	YDL194W	YDL194W	1	TRUE	+	1	73	1	chrIV	111349	A	G	TRUE	0	-1	0	1	0	0	0	0.981	3.31764	FALSE	0.110031	0.0824534	5	637	157	46	FALSE	TRUE	TRUE	231	NA	FALSE	0.019	0.019	FALSE
chrIV_114379_T_C_+	YDL193W_chrIV_114379_T_C_72_2	0.389597	-1.62491	2.40698	0.0280114	0.181952	-3.99527	UpStream	YDL193W	YDL193W	1	TRUE	+	1	73	1	chrIV	114379	T	C	TRUE	0	0	1	0	-1	0	0	0.621	5.50627	TRUE	0.10728	0.0681666	8	1403	609	254	FALSE	TRUE	FALSE	293	1.6	TRUE	0.379	0.621	TRUE
chrIV_116018_T_C_+	YDL192W_chrIV_116018_T_C_72_2	0.167765	-0.258245	1.97702	0.0648604	0.283622	-4.84751	UpStream	YDL192W	YDL192W	1	TRUE	+	1	73	1	chrIV	116018	T	C	TRUE	0	0	1	0	-1	0	0	0.002967	10.0299	FALSE	NA	NA	93	976	164	46	FALSE	TRUE	TRUE	303	2.61	TRUE	0.002967	0.002967	TRUE
chrIV_116227_A_G_+	YDL192W_5UTR_0_21	0.0625582	0.722043	0.560768	0.579065	0.812887	-6.26665	TSS	YDL192W	YDL192W	1	TRUE	+	2	94	1	chrIV	116227	A	G	TRUE	0	-1	0	1	0	0	0	0.79	10.0299	FALSE	NA	NA	93	976	164	46	FALSE	TRUE	TRUE	94	NA	FALSE	0.21	0.21	FALSE
chrIV_116257_C_T_+	YDL192W_5UTR_0_12	-0.00434929	0.685698	-0.0378635	0.970044	0.992589	-6.3416	TSS	YDL192W	YDL192W	1	TRUE	+	2	124	2	chrIV	116257	C	T	TRUE	0	0	-1	0	1	0	0	0.061	10.0299	FALSE	NA	NA	93	976	164	46	FALSE	TRUE	TRUE	64	NA	FALSE	0.061	0.061	TRUE
chrIV_117353_G_A_+	YDL191W_chrIV_117353_G_A_72_2	0.136972	2.26998	1.50861	0.15016	0.448781	-5.539	UpStream	YDL191W	YDL191W	1	TRUE	+	1	73	1	chrIV	117353	G	A	TRUE	0	1	0	-1	0	0	0	0.626	11.6696	FALSE	NA	NA	42	717	329	144	FALSE	TRUE	TRUE	311	1.68	TRUE	0.374	0.626	TRUE
chrIV_117449_CA_C_+	YDL191W_chrIV_117449_CA_C_72_2	0.305379	1.74996	1.9887	0.0634468	0.281853	-4.59507	UpStream	YDL191W	YDL191W	1	TRUE	+	1	72	1	chrIV	117449	CA	C	FALSE	-1	-1	0	0	0	0	0	0.614	11.6696	FALSE	NA	NA	42	717	329	144	FALSE	TRUE	TRUE	215	2.64	TRUE	0.386	NA	NA
chrIV_126538_T_A_-	YDL187C_5UTR_0_2	1.01977	-0.529171	2.3147	0.0275587	0.168529	-3.46957	TSS	YDL187C	YDL187C	1	TRUE	-	1	72	1	chrIV	126538	T	A	TRUE	0	1	0	0	-1	0	1	NA	0.842737	FALSE	NA	NA	NA	388	72	13	FALSE	FALSE	FALSE	700	NA	FALSE	NA	NA	NA
chrIV_130640_G_A_-	YDL184C_chrIV_130640_G_A_72_2	0.0749088	-0.132809	1.04983	0.308813	0.644298	-6.20257	UpStream	YDL184C	YDL184C	1	TRUE	-	1	73	1	chrIV	130640	G	A	TRUE	0	1	0	-1	0	0	0	0.981	NA	FALSE	NA	NA	15	820	160	53	FALSE	FALSE	TRUE	156	NA	FALSE	0.019	0.981	TRUE
chrIV_130869_C_A_-	YDL184C_chrIV_130869_C_A_72_2	0.016305	-1.41228	0.13611	0.893368	0.965276	-6.75592	UpStream	YDL184C	YDL184C	1	TRUE	-	1	73	1	chrIV	130869	C	A	TRUE	0	1	-1	0	0	0	-1	0.982	NA	FALSE	NA	NA	15	820	160	53	FALSE	FALSE	TRUE	385	NA	FALSE	0.018	0.018	FALSE
chrIV_132560_G_A_-	YDL183C_chrIV_132560_G_A_72_2	-0.122686	-1.87251	-0.831393	0.41753	0.741536	-6.18748	UpStream	YDL183C	YDL183C	1	TRUE	-	1	73	1	chrIV	132560	G	A	TRUE	0	1	0	-1	0	0	0	0.973	4.31099	FALSE	NA	NA	3	873	192	65	FALSE	FALSE	FALSE	727	6.3	TRUE	0.027	0.027	FALSE
chrIV_138088_G_A_+	YDL179W_5UTR_0_2	-0.08138	-0.902231	-0.762237	0.451791	0.723258	-6.62285	TSS	YDL179W	YDL179W	1	TRUE	+	1	37	1	chrIV	138088	G	A	TRUE	0	1	0	-1	0	0	0	0.819	6.48733	FALSE	0.184454	0.137054	11	450	96	35	FALSE	FALSE	TRUE	203	3.37	TRUE	0.181	0.181	FALSE
chrIV_139234_T_A_+	YDL178W_chrIV_139234_T_A_72_2	0.00398754	-0.677715	0.0441353	0.965322	0.988373	-6.55486	UpStream	YDL178W	YDL178W	1	TRUE	+	1	73	1	chrIV	139234	T	A	TRUE	0	1	0	0	-1	-1	0	0.558	6.73496	FALSE	0.0474886	0.0333209	3	780	115	28	FALSE	TRUE	FALSE	288	1.31	TRUE	0.442	0.558	TRUE
chrIV_139426_C_A_+	YDL178W_chrIV_139426_C_A_72_2	0.286594	-0.291506	2.75993	0.0135843	0.119606	-3.28432	UpStream	YDL178W	YDL178W	1	TRUE	+	1	73	1	chrIV	139426	C	A	TRUE	0	1	-1	0	0	0	0	0.447	6.73496	FALSE	0.0474886	0.0333209	3	780	115	28	FALSE	TRUE	FALSE	96	NA	FALSE	0.447	0.447	TRUE
chrIV_141921_G_A_-	YDL177C_5UTR_0_2	-0.189164	-0.565119	-2.77431	0.00936796	0.0877524	-3.51868	TSS	YDL177C	YDL177C	1	TRUE	-	1	9	1	chrIV	141921	G	A	TRUE	0	1	0	-1	0	0	0	0.589	5.46129	FALSE	0.119547	0.0890654	5	738	153	42	FALSE	FALSE	FALSE	200	6.03	TRUE	0.411	0.589	TRUE
chrIV_145562_G_C_-	YDL175C_5UTR_0_211	0.0987882	-0.103236	2.48593	0.0186348	0.13498	-4.45443	TSS	YDL175C	YDL175C	1	TRUE	-	3	128	1	chrIV	145562	G	C	TRUE	0	0	1	-1	0	0	0	0.485	4.8009	FALSE	0.0839979	0.0647279	23	828	245	87	FALSE	TRUE	TRUE	44	1.32	TRUE	0.485	0.485	TRUE
chrIV_145686_A_G_-	YDL175C_5UTR_0_121	0.0911774	-0.107064	2.32895	0.0266901	0.167729	-4.73435	TSS	YDL175C	YDL175C	1	TRUE	-	3	4	2	chrIV	145686	A	G	TRUE	0	-1	0	1	0	0	0	0.98	4.8009	FALSE	0.0839979	0.0647279	23	828	245	87	FALSE	TRUE	TRUE	168	4.13	TRUE	0.02	0.02	FALSE
chrIV_145687_T_G_-	YDL175C_5UTR_0_112	0.131712	-0.0854925	2.7033	0.0111315	0.0973602	-3.92921	TSS	YDL175C	YDL175C	1	TRUE	-	3	3	3	chrIV	145687	T	G	TRUE	0	0	0	1	-1	0	0	0.98	4.8009	FALSE	0.0839979	0.0647279	23	828	245	87	FALSE	TRUE	TRUE	169	4.13	TRUE	0.02	0.02	FALSE
chrIV_145805_T_A_-	YDL175C_chrIV_145805_T_A_72_2	0.248072	-1.77212	2.83037	0.0117257	0.110018	-3.35335	UpStream	YDL175C	YDL175C	1	TRUE	-	1	73	1	chrIV	145805	T	A	TRUE	0	1	0	0	-1	0	0	0.914	4.8009	FALSE	0.0839979	0.0647279	23	828	245	87	FALSE	TRUE	TRUE	287	4.43	TRUE	0.086	0.086	FALSE
chrIV_147591_G_A_+	YDL173W_chrIV_147591_G_A_72_2	0.0564234	-0.548837	0.408536	0.688092	0.894566	-6.56172	UpStream	YDL173W	YDL173W	1	TRUE	+	1	73	1	chrIV	147591	G	A	TRUE	0	1	0	-1	0	0	0	0.647	7.74613	FALSE	0.0875606	0.0691469	11	499	145	67	FALSE	FALSE	FALSE	600	2.51	TRUE	0.353	0.647	TRUE
chrIV_147814_T_C_-	YDL174C_chrIV_147814_T_C_72_2	0.0200509	0.622295	0.183678	0.856487	0.952457	-6.49623	UpStream	YDL174C	YDL174C	1	TRUE	-	1	73	1	chrIV	147814	T	C	TRUE	0	0	1	0	-1	0	0	0.006429	7.43528	FALSE	NA	NA	4	946	186	54	FALSE	TRUE	FALSE	225	NA	FALSE	0.006429	0.006429	TRUE
chrIV_147814_T_C_+	YDL173W_chrIV_147814_T_C_72_2	0.210201	0.740339	2.00308	0.0617449	0.279007	-4.50773	UpStream	YDL173W	YDL173W	1	TRUE	+	1	73	1	chrIV	147814	T	C	TRUE	0	0	1	0	-1	0	0	0.006429	7.74613	FALSE	0.0875606	0.0691469	11	499	145	67	FALSE	FALSE	FALSE	377	NA	FALSE	0.006429	0.006429	TRUE
chrIV_147846_T_G_-	YDL174C_chrIV_147846_T_G_72_2	0.171012	1.09483	0.953488	0.353997	0.687603	-5.64255	UpStream	YDL174C	YDL174C	1	TRUE	-	1	73	1	chrIV	147846	T	G	TRUE	0	0	0	1	-1	0	0	0.874	7.43528	FALSE	NA	NA	4	946	186	54	FALSE	TRUE	FALSE	257	NA	FALSE	0.126	0.126	FALSE
chrIV_147846_T_G_+	YDL173W_chrIV_147846_T_G_72_2	1.40549	0.184266	3.15933	0.00584949	0.0722024	-2.13009	UpStream	YDL173W	YDL173W	1	TRUE	+	1	73	1	chrIV	147846	T	G	TRUE	0	0	0	1	-1	0	0	0.874	7.74613	FALSE	0.0875606	0.0691469	11	499	145	67	FALSE	FALSE	FALSE	345	NA	FALSE	0.126	0.126	FALSE
chrIV_148010_T_G_+	YDL173W_chrIV_148010_T_G_72_2	0.0313202	0.580453	0.214944	0.832425	0.946128	-6.23787	UpStream	YDL173W	YDL173W	1	TRUE	+	1	73	1	chrIV	148010	T	G	TRUE	0	0	0	1	-1	0	0	0.947	7.74613	FALSE	0.0875606	0.0691469	11	499	145	67	FALSE	FALSE	FALSE	181	NA	FALSE	0.053	0.053	FALSE
chrIV_148010_T_G_-	YDL174C_chrIV_148010_T_G_72_2	-0.309748	-1.53151	-1.13346	0.273099	0.609325	-5.43619	UpStream	YDL174C	YDL174C	1	TRUE	-	1	73	1	chrIV	148010	T	G	TRUE	0	0	0	1	-1	0	0	0.947	7.43528	FALSE	NA	NA	4	946	186	54	FALSE	TRUE	FALSE	421	NA	FALSE	0.053	0.053	FALSE
chrIV_148054_T_TGTTTC_+	YDL173W_chrIV_148054_T_TGTTTC_72_2	0.234495	-0.223111	1.24573	0.230127	0.56171	-5.55229	UpStream	YDL173W	YDL173W	1	TRUE	+	1	73	1	chrIV	148054	T	TGTTTC	FALSE	5	0	1	1	3	0	0	0.394	7.74613	FALSE	0.0875606	0.0691469	11	499	145	67	FALSE	FALSE	FALSE	137	NA	FALSE	0.394	0.394	TRUE
chrIV_148054_T_TGTTTC_-	YDL174C_chrIV_148054_T_TGTTTC_72_2	-0.312686	-0.341227	-3.22062	0.00513275	0.0674654	-2.41994	UpStream	YDL174C	YDL174C	1	TRUE	-	1	73	1	chrIV	148054	T	TGTTTC	FALSE	5	0	1	1	3	0	0	0.394	7.43528	FALSE	NA	NA	4	946	186	54	FALSE	TRUE	FALSE	465	NA	FALSE	0.394	0.394	TRUE
chrIV_148075_C_T_-	YDL174C_chrIV_148075_C_T_72_2	0.0420713	-0.329764	0.683918	0.503446	0.796599	-6.62742	UpStream	YDL174C	YDL174C	1	TRUE	-	1	73	1	chrIV	148075	C	T	TRUE	0	0	-1	0	1	0	0	0.012	7.43528	FALSE	NA	NA	4	946	186	54	FALSE	TRUE	FALSE	486	NA	FALSE	0.012	0.012	TRUE
chrIV_148075_C_T_+	YDL173W_chrIV_148075_C_T_72_2	0.156319	-0.57038	1.85779	0.0809947	0.317235	-5.09321	UpStream	YDL173W	YDL173W	1	TRUE	+	1	73	1	chrIV	148075	C	T	TRUE	0	0	-1	0	1	0	0	0.012	7.74613	FALSE	0.0875606	0.0691469	11	499	145	67	FALSE	FALSE	FALSE	116	NA	FALSE	0.012	0.012	TRUE
chrIV_156137_C_A_-	YDL171C_chrIV_156137_C_A_72_2	-0.0520726	1.9208	-0.554076	0.586901	0.839627	-6.47605	UpStream	YDL171C	YDL171C	1	TRUE	-	1	73	1	chrIV	156137	C	A	TRUE	0	1	-1	0	0	0	-1	0.633	4.46299	FALSE	NA	NA	34	866	331	108	FALSE	TRUE	FALSE	497	1.35	TRUE	0.367	0.633	TRUE
chrIV_158749_C_T_+	YDL168W_chrIV_158749_C_T_72_2	0.251328	-0.807404	1.98397	0.064016	0.282069	-4.84959	UpStream	YDL168W	YDL168W	1	TRUE	+	1	73	1	chrIV	158749	C	T	TRUE	0	0	-1	0	1	0	0	0.949	7.49526	FALSE	NA	NA	13	1054	279	106	FALSE	TRUE	FALSE	855	1.04	TRUE	0.051	0.051	FALSE
chrIV_158816_T_TC_-	YDL169C_5UTR_0_2	-0.785834	-1.8325	-1.82895	0.0772311	0.297835	-4.70098	TSS	YDL169C	YDL169C	1	TRUE	-	1	103	1	chrIV	158816	T	TC	FALSE	1	0	1	0	0	0	0	0.771	4.67793	FALSE	NA	NA	2	478	69	29	FALSE	FALSE	FALSE	81	NA	FALSE	0.229	0.229	FALSE
chrIV_158816_T_TC_+	YDL168W_chrIV_158816_T_TC_72_2	0.0744506	-0.560526	0.484889	0.63408	0.868603	-6.2393	UpStream	YDL168W	YDL168W	1	TRUE	+	1	73	1	chrIV	158816	T	TC	FALSE	1	0	1	0	0	0	-1	0.771	7.49526	FALSE	NA	NA	13	1054	279	106	FALSE	TRUE	FALSE	788	NA	FALSE	0.229	0.229	FALSE
chrIV_158929_T_C_+	YDL168W_chrIV_158929_T_C_72_2	-0.0113572	-0.772628	-0.080706	0.936639	0.981038	-6.76645	UpStream	YDL168W	YDL168W	1	TRUE	+	1	73	1	chrIV	158929	T	C	TRUE	0	0	1	0	-1	0	-1	0.629	7.49526	FALSE	NA	NA	13	1054	279	106	FALSE	TRUE	FALSE	675	0.51	TRUE	0.371	0.629	TRUE
chrIV_158981_A_C_+	YDL168W_chrIV_158981_A_C_72_2	0.106961	-0.98214	0.734078	0.473124	0.781485	-6.38077	UpStream	YDL168W	YDL168W	1	TRUE	+	1	73	1	chrIV	158981	A	C	TRUE	0	-1	1	0	0	0	0	0.953	7.49526	FALSE	NA	NA	13	1054	279	106	FALSE	TRUE	FALSE	623	0.51	TRUE	0.047	0.047	FALSE
chrIV_159017_A_G_+	YDL168W_chrIV_159017_A_G_72_2	-0.424545	-1.24308	-2.542	0.0213007	0.15529	-3.61174	UpStream	YDL168W	YDL168W	1	TRUE	+	1	73	1	chrIV	159017	A	G	TRUE	0	-1	0	1	0	0	0	0.906	7.49526	FALSE	NA	NA	13	1054	279	106	FALSE	TRUE	FALSE	587	0.51	TRUE	0.094	0.094	FALSE
chrIV_159085_A_C_+	YDL168W_chrIV_159085_A_C_72_2	0.129691	-0.806532	0.788911	0.441266	0.758029	-6.14517	UpStream	YDL168W	YDL168W	1	TRUE	+	1	73	1	chrIV	159085	A	C	TRUE	0	-1	1	0	0	0	0	0.597	7.49526	FALSE	NA	NA	13	1054	279	106	FALSE	TRUE	FALSE	519	2.51	TRUE	0.403	0.597	TRUE
chrIV_159133_C_T_-	YDL169C_chrIV_159133_C_T_72_2	-0.00510933	-2.69072	-0.0588975	0.953736	0.983296	-6.78578	UpStream	YDL169C	YDL169C	1	TRUE	-	1	73	1	chrIV	159133	C	T	TRUE	0	0	-1	0	1	0	0	0.611	4.67793	FALSE	NA	NA	2	478	69	29	FALSE	FALSE	FALSE	398	2.51	TRUE	0.389	0.611	TRUE
chrIV_159133_C_T_+	YDL168W_chrIV_159133_C_T_72_2	-0.320422	-1.81832	-1.89112	0.0761579	0.307452	-4.72848	UpStream	YDL168W	YDL168W	1	TRUE	+	1	73	1	chrIV	159133	C	T	TRUE	0	0	-1	0	1	0	0	0.611	7.49526	FALSE	NA	NA	13	1054	279	106	FALSE	TRUE	FALSE	471	2.51	TRUE	0.389	0.611	TRUE
chrIV_159190_A_G_+	YDL168W_chrIV_159190_A_G_72_2	0.0894789	-1.68364	0.610515	0.549774	0.821169	-6.36709	UpStream	YDL168W	YDL168W	1	TRUE	+	1	73	1	chrIV	159190	A	G	TRUE	0	-1	0	1	0	0	0	0.856	7.49526	FALSE	NA	NA	13	1054	279	106	FALSE	TRUE	FALSE	414	2.51	TRUE	0.144	0.144	FALSE
chrIV_159318_T_C_+	YDL168W_chrIV_159318_T_C_72_2	-0.0747281	-1.52101	-0.61953	0.543962	0.818119	-6.48454	UpStream	YDL168W	YDL168W	1	TRUE	+	1	73	1	chrIV	159318	T	C	TRUE	0	0	1	0	-1	0	-1	0.575	7.49526	FALSE	NA	NA	13	1054	279	106	FALSE	TRUE	FALSE	286	4.08	TRUE	0.425	0.575	TRUE
chrIV_159320_G_C_+	YDL168W_chrIV_159320_G_C_72_2	0.0845834	-1.09611	0.684308	0.503206	0.796599	-6.34715	UpStream	YDL168W	YDL168W	1	TRUE	+	1	73	1	chrIV	159320	G	C	TRUE	0	0	1	-1	0	0	0	0.665	7.49526	FALSE	NA	NA	13	1054	279	106	FALSE	TRUE	FALSE	284	4.08	TRUE	0.335	0.335	FALSE
chrIV_159428_T_C_+	YDL168W_5UTR_0_21	0.619807	0.372546	8.58592	1.25611e-09	1.58845e-07	11.9978	TSS	YDL168W	YDL168W	1	TRUE	+	2	11	1	chrIV	159428	T	C	TRUE	0	0	1	0	-1	0	0	0.794	7.49526	FALSE	NA	NA	13	1054	279	106	FALSE	TRUE	FALSE	176	2.06	TRUE	0.206	0.794	TRUE
chrIV_159505_T_C_+	YDL168W_5UTR_0_12	0.129113	0.125458	2.37312	0.0241513	0.157695	-4.3944	TSS	YDL168W	YDL168W	1	TRUE	+	2	88	2	chrIV	159505	T	C	TRUE	0	0	1	0	-1	0	0	0.535	7.49526	FALSE	NA	NA	13	1054	279	106	FALSE	TRUE	FALSE	99	5.79	TRUE	0.465	0.535	TRUE
chrIV_159505_T_C_-	YDL169C_chrIV_159505_T_C_72_2	-0.10805	-1.52013	-0.684647	0.502997	0.796599	-6.32293	UpStream	YDL169C	YDL169C	1	TRUE	-	1	73	1	chrIV	159505	T	C	TRUE	0	0	1	0	-1	0	0	0.535	4.67793	FALSE	NA	NA	2	478	69	29	FALSE	FALSE	FALSE	770	5.79	TRUE	0.465	0.535	TRUE
chrIV_164200_A_G_+	YDL165W_5UTR_0_21	0.0383727	-0.144392	0.342821	0.734092	0.891544	-6.36659	TSS	YDL165W	YDL165W	1	TRUE	+	2	104	1	chrIV	164200	A	G	TRUE	0	-1	0	1	0	0	1	0.291	6.76755	TRUE	0.0179317	0.0118278	43	771	335	143	FALSE	TRUE	FALSE	90	NA	FALSE	0.291	0.291	TRUE
chrIV_164200_A_G_-	YDL166C_5UTR_0_21	-0.0110368	0.307161	-0.0487431	0.961443	0.989481	-5.8772	TSS	YDL166C	YDL166C	1	TRUE	-	2	41	1	chrIV	164200	A	G	TRUE	0	-1	0	1	0	0	0	0.291	6.84398	TRUE	0.0482386	0.0351131	43	NA	NA	NA	FALSE	TRUE	FALSE	158	NA	FALSE	0.291	0.291	TRUE
chrIV_164238_C_T_+	YDL165W_5UTR_0_12	0.0253107	-0.153285	0.231803	0.818244	0.929726	-6.47602	TSS	YDL165W	YDL165W	1	TRUE	+	2	142	2	chrIV	164238	C	T	TRUE	0	0	-1	0	1	0	0	0.65	6.76755	TRUE	0.0179317	0.0118278	43	771	335	143	FALSE	TRUE	FALSE	52	NA	FALSE	0.35	0.35	FALSE
chrIV_167436_GC_G_-	YDL164C_5UTR_0_2	-0.0313635	-0.976981	-0.373157	0.71162	0.884426	-7.1031	TSS	YDL164C	YDL164C	1	TRUE	-	1	14	1	chrIV	167436	GC	G	FALSE	-1	0	-1	0	0	0	0	0.046	5.23355	TRUE	NA	NA	19	1516	629	229	FALSE	TRUE	FALSE	182	6.97	TRUE	0.046	0.046	TRUE
chrIV_172151_A_T_-	YDL160C_chrIV_172151_A_T_72_2	-0.113652	-0.541428	-0.860025	0.402003	0.733672	-6.23558	UpStream	YDL160C	YDL160C	1	TRUE	-	1	73	1	chrIV	172151	A	T	TRUE	0	-1	0	0	1	0	0	0.66	4.51087	FALSE	NA	NA	356	84	23	11	FALSE	TRUE	FALSE	221	2.76	TRUE	0.34	0.34	FALSE
chrIV_172218_T_C_-	YDL160C_5UTR_0_2	-0.103665	0.941483	-1.88429	0.0691177	0.281188	-5.44944	TSS	YDL160C	YDL160C	1	TRUE	-	1	141	1	chrIV	172218	T	C	TRUE	0	0	1	0	-1	0	0	0.65	4.51087	FALSE	NA	NA	356	84	23	11	FALSE	TRUE	FALSE	288	NA	FALSE	0.35	0.35	FALSE
chrIV_172408_A_T_+	YDL159W_5UTR_0_2	-0.0544665	-0.855126	-0.804215	0.427516	0.708629	-6.61458	TSS	YDL159W	YDL159W	1	TRUE	+	1	118	1	chrIV	172408	A	T	TRUE	0	-1	0	0	1	0	0	0.324	4.73569	FALSE	NA	NA	34	129	44	10	FALSE	FALSE	FALSE	73	7.21	TRUE	0.324	0.676	FALSE
chrIV_173380_C_T_-	YDL159C-B_chrIV_173380_C_T_72_2	0.0432903	-0.601593	0.34547	0.734072	0.913935	-6.66592	UpStream	YDL159C-B	YDL159C-B	1	TRUE	-	1	73	1	chrIV	173380	C	T	TRUE	0	0	-1	0	1	0	0	0.973	NA	FALSE	NA	NA	NA	NA	NA	NA	FALSE	FALSE	FALSE	148	1.12	TRUE	0.027	0.027	FALSE
chrIV_173416_T_C_-	YDL159C-B_chrIV_173416_T_C_72_2	0.153401	-0.332935	1.17565	0.256293	0.591038	-6.04944	UpStream	YDL159C-B	YDL159C-B	1	TRUE	-	1	73	1	chrIV	173416	T	C	TRUE	0	0	1	0	-1	0	0	0.453	NA	FALSE	NA	NA	NA	NA	NA	NA	FALSE	FALSE	FALSE	184	7.96	TRUE	0.453	0.453	TRUE
chrIV_174831_C_T_-	YDL157C_chrIV_174831_C_T_72_2	0.373405	-0.839649	3.1349	0.00616191	0.0746276	-2.51686	UpStream	YDL157C	YDL157C	1	TRUE	-	1	73	1	chrIV	174831	C	T	TRUE	0	0	-1	0	1	0	0	0.697	7.47908	FALSE	0.0686551	0.044426	3	1166	374	152	FALSE	FALSE	FALSE	243	1.8	TRUE	0.303	0.303	FALSE
chrIV_174887_C_T_-	YDL157C_chrIV_174887_C_T_72_2	-0.274748	-0.942695	-2.54543	0.021152	0.154746	-3.70002	UpStream	YDL157C	YDL157C	1	TRUE	-	1	73	1	chrIV	174887	C	T	TRUE	0	0	-1	0	1	0	0	0.699	7.47908	FALSE	0.0686551	0.044426	3	1166	374	152	FALSE	FALSE	FALSE	299	1.8	TRUE	0.301	0.301	FALSE
chrIV_174905_T_C_-	YDL157C_chrIV_174905_T_C_72_2	0.0761996	-0.859354	0.670418	0.511794	0.800003	-6.42712	UpStream	YDL157C	YDL157C	1	TRUE	-	1	73	1	chrIV	174905	T	C	TRUE	0	0	1	0	-1	0	0	0.681	7.47908	FALSE	0.0686551	0.044426	3	1166	374	152	FALSE	FALSE	FALSE	317	1.8	TRUE	0.319	0.681	TRUE
chrIV_176519_T_C_+	YDL155W_chrIV_176519_T_C_72_2	0.0481871	-0.0164812	0.686864	0.501635	0.796599	-6.59761	UpStream	YDL155W	YDL155W	1	TRUE	+	1	73	1	chrIV	176519	T	C	TRUE	0	0	1	0	-1	0	0	0.974	5.94032	FALSE	0.100526	0.0731143	42	503	137	59	FALSE	TRUE	TRUE	254	5.91	TRUE	0.026	0.026	FALSE
chrIV_176628_C_T_+	YDL155W_5UTR_0_12	0.24962	0.618771	4.81787	3.77797e-05	0.00141557	1.81821	TSS	YDL155W	YDL155W	1	TRUE	+	2	130	2	chrIV	176628	C	T	TRUE	0	0	-1	0	1	0	0	0.991	5.94032	FALSE	0.100526	0.0731143	42	503	137	59	FALSE	TRUE	TRUE	145	5.91	TRUE	0.009	0.009	FALSE
chrIV_182498_A_G_+	YDL152W_chrIV_182498_A_G_72_2	-0.0358056	-0.57376	-0.276538	0.785543	0.93075	-6.38594	UpStream	YDL152W	YDL152W	1	TRUE	+	1	73	1	chrIV	182498	A	G	TRUE	0	-1	0	1	0	0	0	0.601	NA	TRUE	NA	NA	NA	NA	NA	NA	FALSE	FALSE	FALSE	324	1.81	TRUE	0.399	0.601	TRUE
chrIV_184671_C_CAA_+	YDL149W_chrIV_184671_C_CAA_72_2	0.108361	-1.78884	1.42904	0.171507	0.482416	-5.76125	UpStream	YDL149W	YDL149W	1	TRUE	+	1	73	1	chrIV	184671	C	CAA	FALSE	2	2	0	0	0	0	0	0.57	3.62466	FALSE	NA	NA	107	1097	305	128	FALSE	TRUE	FALSE	254	9.63	TRUE	0.43	0.57	TRUE
chrIV_190604_T_G_+	YDL147W_chrIV_190604_T_G_72_2	-0.092915	-0.696848	-0.663927	0.515837	0.802688	-6.45288	UpStream	YDL147W	YDL147W	1	TRUE	+	1	73	1	chrIV	190604	T	G	TRUE	0	0	0	1	-1	0	0	0.59	7.88748	TRUE	0.0407193	0.0277418	99	2119	1051	454	FALSE	TRUE	FALSE	320	3.1	TRUE	0.41	0.59	TRUE
chrIV_190810_C_T_+	YDL147W_5UTR_0_21	0.482236	1.09763	2.12188	0.0421041	0.219187	-3.81135	TSS	YDL147W	YDL147W	1	TRUE	+	2	62	1	chrIV	190810	C	T	TRUE	0	0	-1	0	1	0	0	0.993	7.88748	TRUE	0.0407193	0.0277418	99	2119	1051	454	FALSE	TRUE	FALSE	114	3.15	TRUE	0.007	0.007	FALSE
chrIV_190810_C_T_-	YDL148C_chrIV_190810_C_T_72_2	0.0164194	0.678412	0.186914	0.853989	0.95174	-6.53615	UpStream	YDL148C	YDL148C	1	TRUE	-	1	73	1	chrIV	190810	C	T	TRUE	0	0	-1	0	1	0	0	0.993	6.22632	TRUE	0.0891968	0.0629283	80	844	510	242	FALSE	TRUE	FALSE	224	3.15	TRUE	0.007	0.007	FALSE
chrIV_190888_C_G_+	YDL147W_5UTR_0_12	-0.265928	0.728736	-0.878825	0.386389	0.675852	-5.21915	TSS	YDL147W	YDL147W	1	TRUE	+	2	140	2	chrIV	190888	C	G	TRUE	0	0	-1	1	0	0	0	0.667	7.88748	TRUE	0.0407193	0.0277418	99	2119	1051	454	FALSE	TRUE	FALSE	36	3.06	TRUE	0.333	0.667	TRUE
chrIV_190888_C_G_-	YDL148C_chrIV_190888_C_G_72_2	-0.191648	-1.30382	-1.38904	0.183142	0.498757	-5.65592	UpStream	YDL148C	YDL148C	1	TRUE	-	1	73	1	chrIV	190888	C	G	TRUE	0	0	-1	1	0	0	0	0.667	6.22632	TRUE	0.0891968	0.0629283	80	844	510	242	FALSE	TRUE	FALSE	302	3.06	TRUE	0.333	0.667	TRUE
chrIV_192451_G_A_+	YDL146W_chrIV_192451_G_A_72_2	-0.0661918	0.260697	-0.801514	0.434138	0.752584	-6.48305	UpStream	YDL146W	YDL146W	1	TRUE	+	1	73	1	chrIV	192451	G	A	TRUE	0	1	0	-1	0	0	-1	0.909	4.29336	FALSE	0.0861544	0.0608921	5	1059	186	66	FALSE	FALSE	FALSE	299	NA	FALSE	0.091	0.091	FALSE
chrIV_198376_TG_T_-	YDL145C_chrIV_198376_TG_T_72_2	-0.392412	-0.295363	-3.44344	0.0031852	0.0480901	-2.06138	UpStream	YDL145C	YDL145C	1	TRUE	-	1	74	1	chrIV	198376	TG	T	FALSE	-1	0	0	-1	0	0	0	0.988	6.56592	TRUE	0.0433612	0.0263798	75	1394	669	357	FALSE	TRUE	FALSE	200	6.26	TRUE	0.012	0.012	FALSE
chrIV_198659_G_A_-	YDL145C_chrIV_198659_G_A_72_2	-0.0833426	-1.27188	-1.28741	0.21558	0.54247	-6.01847	UpStream	YDL145C	YDL145C	1	TRUE	-	1	73	1	chrIV	198659	G	A	TRUE	0	1	0	-1	0	0	0	0.739	6.56592	TRUE	0.0433612	0.0263798	75	1394	669	357	FALSE	TRUE	FALSE	483	7.08	TRUE	0.261	0.261	FALSE
chrIV_199794_T_C_+	YDL143W_chrIV_199794_T_C_72_2	0.01902	0.666054	0.193916	0.848591	0.950251	-6.51081	UpStream	YDL143W	YDL143W	1	TRUE	+	1	73	1	chrIV	199794	T	C	TRUE	0	0	1	0	-1	0	0	0.496	7.63678	TRUE	0.0220261	0.0128936	51	1364	593	268	FALSE	TRUE	FALSE	202	NA	FALSE	0.496	0.496	TRUE
chrIV_202790_A_T_+	YDL141W_chrIV_202790_A_T_72_2	0.229816	-0.562639	1.52902	0.145056	0.441893	-5.3625	UpStream	YDL141W	YDL141W	1	TRUE	+	1	73	1	chrIV	202790	A	T	TRUE	0	-1	0	0	1	0	0	0.527	5.211	TRUE	NA	NA	8	NA	NA	NA	FALSE	TRUE	FALSE	249	1.27	TRUE	0.473	0.527	TRUE
chrIV_210685_A_AT_-	YDL140C_chrIV_210685_A_AT_72_2	-0.589421	0.326301	-3.22538	0.00508079	0.0669795	-2.03339	UpStream	YDL140C	YDL140C	1	TRUE	-	1	73	1	chrIV	210685	A	AT	FALSE	1	0	0	0	1	0	0	0.086	5.69823	TRUE	NA	NA	192	1623	762	368	FALSE	TRUE	FALSE	124	2.56	TRUE	0.086	NA	NA
chrIV_210686_A_T_-	YDL140C_chrIV_210686_A_T_72_2	-0.118094	0.370671	-0.685062	0.502742	0.796599	-5.86036	UpStream	YDL140C	YDL140C	1	TRUE	-	1	73	1	chrIV	210686	A	T	TRUE	0	-1	0	0	1	0	0	0.642	5.69823	TRUE	NA	NA	192	1623	762	368	FALSE	TRUE	FALSE	125	2.56	TRUE	0.358	NA	NA
chrIV_210813_GAA_GA_-	YDL140C_chrIV_210813_GAA_GA_72_2	-0.0969008	-0.611452	-0.783098	0.444578	0.759262	-6.30878	UpStream	YDL140C	YDL140C	1	TRUE	-	1	74	1	chrIV	210813	GAA	GA	FALSE	-1	-1	0	0	0	0	0	0.447	5.69823	TRUE	NA	NA	192	1623	762	368	FALSE	TRUE	FALSE	252	NA	FALSE	0.447	0.553	FALSE
chrIV_210833_A_G_-	YDL140C_chrIV_210833_A_G_72_2	-0.237435	-0.723378	-1.92242	0.0718534	0.30132	-4.81749	UpStream	YDL140C	YDL140C	1	TRUE	-	1	73	1	chrIV	210833	A	G	TRUE	0	-1	0	1	0	0	0	0.362	5.69823	TRUE	NA	NA	192	1623	762	368	FALSE	TRUE	FALSE	272	NA	FALSE	0.362	0.362	TRUE
chrIV_210847_G_GT_-	YDL140C_chrIV_210847_G_GT_72_2	-0.0611015	-0.526181	-0.45426	0.655514	0.875702	-6.38744	UpStream	YDL140C	YDL140C	1	TRUE	-	1	73	1	chrIV	210847	G	GT	FALSE	1	0	0	0	1	0	0	0.992	5.69823	TRUE	NA	NA	192	1623	762	368	FALSE	TRUE	FALSE	286	3.67	TRUE	0.008	0.008	FALSE
chrIV_210984_T_TA_-	YDL140C_chrIV_210984_T_TA_72_2	0.104352	-0.534765	0.637196	0.532672	0.809751	-6.32589	UpStream	YDL140C	YDL140C	1	TRUE	-	1	73	1	chrIV	210984	T	TA	FALSE	1	1	0	0	0	0	0	0.903	5.69823	TRUE	NA	NA	192	1623	762	368	FALSE	TRUE	FALSE	423	NA	FALSE	0.097	0.097	FALSE
chrIV_211091_C_T_-	YDL140C_chrIV_211091_C_T_72_2	0.179674	-0.849996	1.57736	0.133543	0.421762	-5.51338	UpStream	YDL140C	YDL140C	1	TRUE	-	1	73	1	chrIV	211091	C	T	TRUE	0	0	-1	0	1	0	0	0.271	5.69823	TRUE	NA	NA	192	1623	762	368	FALSE	TRUE	FALSE	530	1.99	TRUE	0.271	0.271	TRUE
chrIV_211126_C_T_-	YDL140C_chrIV_211126_C_T_72_2	-0.0721248	-0.414438	-0.456387	0.654015	0.875227	-6.45035	UpStream	YDL140C	YDL140C	1	TRUE	-	1	73	1	chrIV	211126	C	T	TRUE	0	0	-1	0	1	0	0	0.624	5.69823	TRUE	NA	NA	192	1623	762	368	FALSE	TRUE	FALSE	565	1.99	TRUE	0.376	0.624	TRUE
chrIV_211301_C_T_-	YDL140C_chrIV_211301_C_T_72_2	0.0481091	0.589578	0.144809	0.886602	0.962406	-5.53395	UpStream	YDL140C	YDL140C	1	TRUE	-	1	73	1	chrIV	211301	C	T	TRUE	0	0	-1	0	1	0	0	0.784	5.69823	TRUE	NA	NA	192	1623	762	368	FALSE	TRUE	FALSE	740	3.37	TRUE	0.216	0.216	FALSE
chrIV_211370_G_A_-	YDL140C_chrIV_211370_G_A_72_2	-0.0318251	-1.70569	-0.166965	0.869411	0.956036	-6.1642	UpStream	YDL140C	YDL140C	1	TRUE	-	1	73	1	chrIV	211370	G	A	TRUE	0	1	0	-1	0	0	0	0.62	5.69823	TRUE	NA	NA	192	1623	762	368	FALSE	TRUE	FALSE	809	4.54	TRUE	0.38	0.62	TRUE
chrIV_212222_A_G_-	YDL139C_5UTR_0_21	0.142302	-0.97673	1.0381	0.307409	0.603484	-6.21729	TSS	YDL139C	YDL139C	1	TRUE	-	2	20	1	chrIV	212222	A	G	TRUE	0	-1	0	1	0	0	0	0.722	4.66062	TRUE	0.148904	0.116315	28	615	256	126	FALSE	FALSE	FALSE	176	0.29	TRUE	0.278	0.278	FALSE
chrIV_212228_TTAAAG_T_-	YDL139C_5UTR_0_12	0.117329	-0.988384	1.11771	0.272443	0.572376	-6.15954	TSS	YDL139C	YDL139C	1	TRUE	-	2	14	2	chrIV	212228	TTAAAG	T	FALSE	-5	-3	0	-1	-1	0	0	0.635	4.66062	TRUE	0.148904	0.116315	28	615	256	126	FALSE	FALSE	FALSE	182	0.29	TRUE	0.365	0.365	FALSE
chrIV_212460_A_C_+	YDL138W_chrIV_212460_A_C_72_2	0.180609	-1.48815	0.406735	0.689389	0.895604	-5.66739	UpStream	YDL138W	YDL138W	1	TRUE	+	1	73	1	chrIV	212460	A	C	TRUE	0	-1	1	0	0	0	0	0.641	4.86664	FALSE	0.152851	0.120203	5	1212	476	170	FALSE	TRUE	TRUE	891	1	TRUE	0.359	0.641	TRUE
chrIV_213112_A_G_+	YDL138W_chrIV_213112_A_G_72_2	0.0380726	-0.733416	0.291668	0.774147	0.926665	-6.69451	UpStream	YDL138W	YDL138W	1	TRUE	+	1	73	1	chrIV	213112	A	G	TRUE	0	-1	0	1	0	0	0	0.945	4.86664	FALSE	0.152851	0.120203	5	1212	476	170	FALSE	TRUE	TRUE	239	NA	FALSE	0.055	0.055	FALSE
chrIV_213154_A_AT_+	YDL138W_5UTR_0_12	-0.120264	-0.688284	-1.007	0.321883	0.617128	-5.85676	TSS	YDL138W	YDL138W	1	TRUE	+	2	124	2	chrIV	213154	A	AT	FALSE	1	0	0	0	1	0	0	0.938	4.86664	FALSE	0.152851	0.120203	5	1212	476	170	FALSE	TRUE	TRUE	197	NA	FALSE	0.062	0.938	TRUE
chrIV_217351_G_A_+	YDL136W_chrIV_217351_G_A_72_2	-0.0829809	2.11573	-0.863021	0.400401	0.733057	-6.24459	UpStream	YDL136W	YDL136W	1	TRUE	+	1	73	1	chrIV	217351	G	A	TRUE	0	1	0	-1	0	0	0	0.644	10.2763	FALSE	NA	NA	39	1212	360	115	FALSE	TRUE	TRUE	249	0.83	TRUE	0.356	0.644	TRUE
chrIV_217385_TG_T_+	YDL136W_chrIV_217385_TG_T_72_2	0.216916	2.20971	2.1748	0.0443834	0.236635	-4.40036	UpStream	YDL136W	YDL136W	1	TRUE	+	1	72	1	chrIV	217385	TG	T	FALSE	-1	0	0	-1	0	0	0	0.591	10.2763	FALSE	NA	NA	39	1212	360	115	FALSE	TRUE	TRUE	215	0.83	TRUE	0.409	NA	NA
chrIV_217387_G_A_+	YDL136W_chrIV_217387_G_A_72_2	0.167508	2.05283	1.73427	0.101365	0.362401	-5.2078	UpStream	YDL136W	YDL136W	1	TRUE	+	1	73	1	chrIV	217387	G	A	TRUE	0	1	0	-1	0	0	0	0.547	10.2763	FALSE	NA	NA	39	1212	360	115	FALSE	TRUE	TRUE	213	0.83	TRUE	0.453	0.547	TRUE
chrIV_217405_C_T_+	YDL136W_chrIV_217405_C_T_72_2	0.00590006	1.7132	0.0642523	0.949535	0.982285	-6.54302	UpStream	YDL136W	YDL136W	1	TRUE	+	1	73	1	chrIV	217405	C	T	TRUE	0	0	-1	0	1	0	0	0.974	10.2763	FALSE	NA	NA	39	1212	360	115	FALSE	TRUE	TRUE	195	0.83	TRUE	0.026	0.026	FALSE
chrIV_219340_C_A_-	YDL135C_5UTR_0_2	0.179593	-0.203343	0.527709	0.601531	0.830633	-5.53098	TSS	YDL135C	YDL135C	1	TRUE	-	1	138	1	chrIV	219340	C	A	TRUE	0	1	-1	0	0	0	0	0.963	7.49875	FALSE	NA	NA	7	828	195	59	FALSE	TRUE	FALSE	52	1.47	TRUE	0.037	NA	NA
chrIV_221261_A_G_-	YDL134C_5UTR_0_2	-0.181434	0.804689	-0.792431	0.434249	0.71207	-5.54913	TSS	YDL134C	YDL134C	1	TRUE	-	1	126	1	chrIV	221261	A	G	TRUE	0	-1	0	1	0	0	0	0.049	7.32096	FALSE	NA	NA	41	983	208	68	FALSE	TRUE	TRUE	490	2.74	TRUE	0.049	0.049	TRUE
chrIV_221471_A_G_-	YDL134C_chrIV_221471_A_G_72_2	0.351815	-0.670125	1.20118	0.24651	0.583631	-5.17565	UpStream	YDL134C	YDL134C	1	TRUE	-	1	73	1	chrIV	221471	A	G	TRUE	0	-1	0	1	0	0	0	0.803	7.32096	FALSE	NA	NA	41	983	208	68	FALSE	TRUE	TRUE	700	2.5	TRUE	0.197	0.197	FALSE
chrIV_221893_C_T_-	YDL133C-A_chrIV_221893_C_T_72_2	0.0100123	-1.03984	0.091842	0.927921	0.978953	-6.46632	UpStream	YDL133C-A	YDL133C-A	1	TRUE	-	1	73	1	chrIV	221893	C	T	TRUE	0	0	-1	0	1	0	0	0.795	NA	FALSE	NA	NA	7	343	89	28	FALSE	FALSE	TRUE	92	4.11	TRUE	0.205	0.205	FALSE
chrIV_222025_C_A_-	YDL133C-A_chrIV_222025_C_A_72_2	0.0819235	-0.800058	0.754428	0.461142	0.771255	-6.31633	UpStream	YDL133C-A	YDL133C-A	1	TRUE	-	1	73	1	chrIV	222025	C	A	TRUE	0	1	-1	0	0	0	0	0.619	NA	FALSE	NA	NA	7	343	89	28	FALSE	FALSE	TRUE	224	NA	FALSE	0.381	0.619	TRUE
chrIV_222257_G_A_+	YDL133W_5UTR_0_2	-0.0666399	-0.106427	-0.312408	0.756863	0.901435	-5.91695	TSS	YDL133W	YDL133W	1	TRUE	+	1	110	1	chrIV	222257	G	A	TRUE	0	1	0	-1	0	0	1	0.806	5.57241	FALSE	NA	NA	5	913	141	43	FALSE	FALSE	FALSE	170	1.28	TRUE	0.194	0.194	FALSE
chrIV_223943_G_A_+	YDL132W_chrIV_223943_G_A_72_2	0.128807	-0.707997	2.1139	0.0499504	0.254247	-4.72221	UpStream	YDL132W	YDL132W	1	TRUE	+	1	73	1	chrIV	223943	G	A	TRUE	0	1	0	-1	0	0	0	0.969	6.28413	TRUE	NA	NA	58	1451	854	399	FALSE	TRUE	FALSE	361	6.65	TRUE	0.031	0.031	FALSE
chrIV_224112_C_T_+	YDL132W_chrIV_224112_C_T_72_2	0.135227	-0.200472	0.69754	0.495102	0.793051	-6.12686	UpStream	YDL132W	YDL132W	1	TRUE	+	1	73	1	chrIV	224112	C	T	TRUE	0	0	-1	0	1	0	0	0.969	6.28413	TRUE	NA	NA	58	1451	854	399	FALSE	TRUE	FALSE	192	2.68	TRUE	0.031	0.031	FALSE
chrIV_227127_A_G_+	YDL131W_chrIV_227127_A_G_72_2	-0.0900398	2.72717	-1.15164	0.265755	0.600553	-6.04005	UpStream	YDL131W	YDL131W	1	TRUE	+	1	73	1	chrIV	227127	A	G	TRUE	0	-1	0	1	0	0	0	0.965	9.28907	FALSE	NA	NA	26	521	80	20	FALSE	FALSE	TRUE	266	NA	FALSE	0.035	0.035	FALSE
chrIV_227133_C_T_+	YDL131W_chrIV_227133_C_T_72_2	0.021578	1.61727	0.329306	0.746036	0.917275	-6.70841	UpStream	YDL131W	YDL131W	1	TRUE	+	1	73	1	chrIV	227133	C	T	TRUE	0	0	-1	0	1	0	0	0.653	9.28907	FALSE	NA	NA	26	521	80	20	FALSE	FALSE	TRUE	260	NA	FALSE	0.347	0.653	TRUE
chrIV_227300_A_G_+	YDL131W_chrIV_227300_A_G_72_2	0.0380441	-1.46158	0.354817	0.727186	0.910602	-6.48088	UpStream	YDL131W	YDL131W	1	TRUE	+	1	73	1	chrIV	227300	A	G	TRUE	0	-1	0	1	0	0	0	0.664	9.28907	FALSE	NA	NA	26	521	80	20	FALSE	FALSE	TRUE	93	2	TRUE	0.336	0.336	FALSE
chrIV_229828_G_C_+	YDL130W_5UTR_0_211	0.0105236	-0.775531	0.111233	0.912163	0.966625	-6.89035	TSS	YDL130W	YDL130W	1	TRUE	+	3	84	1	chrIV	229828	G	C	TRUE	0	0	1	-1	0	0	0	0.936	10.6044	FALSE	NA	NA	31	1295	451	141	FALSE	FALSE	FALSE	78	2.02	TRUE	0.064	0.064	FALSE
chrIV_229843_A_C_+	YDL130W_5UTR_0_121	-0.0653734	-0.814058	-0.610054	0.546358	0.790024	-6.75712	TSS	YDL130W	YDL130W	1	TRUE	+	3	99	2	chrIV	229843	A	C	TRUE	0	-1	1	0	0	0	0	0.714	10.6044	FALSE	NA	NA	31	1295	451	141	FALSE	FALSE	FALSE	63	2.02	TRUE	0.286	0.714	TRUE
chrIV_229868_T_A_+	YDL130W_5UTR_0_112	-0.00970683	-0.784411	-0.107826	0.914842	0.968031	-6.89387	TSS	YDL130W	YDL130W	1	TRUE	+	3	124	3	chrIV	229868	T	A	TRUE	0	1	0	0	-1	0	0	0.933	10.6044	FALSE	NA	NA	31	1295	451	141	FALSE	FALSE	FALSE	38	2.02	TRUE	0.067	0.067	FALSE
chrIV_230893_C_T_+	YDL129W_5UTR_0_2	-0.124445	0.0294715	-0.63784	0.528352	0.778298	-5.70402	TSS	YDL129W	YDL129W	1	TRUE	+	1	119	1	chrIV	230893	C	T	TRUE	0	0	-1	0	1	0	0	0.847	3.79321	FALSE	NA	NA	4	777	98	29	FALSE	FALSE	FALSE	131	NA	FALSE	0.153	0.153	FALSE
chrIV_232542_TAAAAGAAGTTTCCTCTTTCCTAAACTTA_T_+	YDL128W_5UTR_0_2	-0.248439	0.342698	-4.59474	7.10463e-05	0.00237713	1.09613	TSS	YDL128W	YDL128W	1	TRUE	+	1	104	1	chrIV	232542	TAAAAGAAGTTTCCTCTTTCCTAAACTTA	T	FALSE	-28	-10	-6	-2	-10	0	0	0.629	6.84244	FALSE	NA	NA	13	443	65	11	FALSE	FALSE	FALSE	110	2.27	TRUE	0.371	NA	NA
chrIV_234289_G_A_+	YDL127W_chrIV_234289_G_A_72_2	0.509968	-1.00445	6.14086	1.19842e-05	0.000877989	3.43337	UpStream	YDL127W	YDL127W	1	TRUE	+	1	73	1	chrIV	234289	G	A	TRUE	0	1	0	-1	0	0	0	0.658	5.65404	FALSE	NA	NA	10	768	161	52	FALSE	FALSE	TRUE	638	NA	FALSE	0.342	0.658	TRUE
chrIV_234536_C_T_+	YDL127W_chrIV_234536_C_T_72_2	-0.475049	2.12954	-5.46877	4.49418e-05	0.00210662	2.17707	UpStream	YDL127W	YDL127W	1	TRUE	+	1	73	1	chrIV	234536	C	T	TRUE	0	0	-1	0	1	0	0	0.0009891	5.65404	FALSE	NA	NA	10	768	161	52	FALSE	FALSE	TRUE	391	NA	FALSE	0.0009891	0.0009891	TRUE
chrIV_238826_G_T_-	YDL126C_chrIV_238826_G_T_72_2	0.500523	0.392314	0.853709	0.405395	0.73399	-5.11536	UpStream	YDL126C	YDL126C	1	TRUE	-	1	73	1	chrIV	238826	G	T	TRUE	0	0	0	-1	1	0	0	0.979	8.77913	TRUE	NA	NA	129	2357	1275	573	FALSE	TRUE	FALSE	162	NA	FALSE	0.021	0.021	FALSE
chrIV_239643_T_C_+	YDL124W_chrIV_239643_T_C_72_2	-0.0756262	0.60566	-0.932099	0.364621	0.696965	-6.31538	UpStream	YDL124W	YDL124W	1	TRUE	+	1	73	1	chrIV	239643	T	C	TRUE	0	0	1	0	-1	0	0	0.806	8.96061	FALSE	NA	NA	10	892	190	65	FALSE	FALSE	FALSE	616	NA	FALSE	0.194	0.194	FALSE
chrIV_239877_C_T_+	YDL124W_chrIV_239877_C_T_72_2	-0.0491607	-0.215279	-0.36059	0.722945	0.909432	-6.40467	UpStream	YDL124W	YDL124W	1	TRUE	+	1	73	1	chrIV	239877	C	T	TRUE	0	0	-1	0	1	0	0	0.18	8.96061	FALSE	NA	NA	10	892	190	65	FALSE	FALSE	FALSE	382	NA	FALSE	0.18	0.18	TRUE
chrIV_239877_C_T_-	YDL125C_5UTR_0_211	0.108744	0.651312	2.05544	0.0485116	0.231863	-5.3725	TSS	YDL125C	YDL125C	1	TRUE	-	3	84	1	chrIV	239877	C	T	TRUE	0	0	-1	0	1	0	0	0.18	8.12814	FALSE	NA	NA	14	559	109	49	FALSE	FALSE	FALSE	271	NA	FALSE	0.18	0.18	TRUE
chrIV_239899_A_G_-	YDL125C_5UTR_0_121	-0.231378	0.482313	-4.21454	0.000206675	0.00501806	-0.203233	TSS	YDL125C	YDL125C	1	TRUE	-	3	62	2	chrIV	239899	A	G	TRUE	0	-1	0	1	0	0	0	0.961	8.12814	FALSE	NA	NA	14	559	109	49	FALSE	FALSE	FALSE	293	NA	FALSE	0.039	0.039	FALSE
chrIV_239899_A_G_+	YDL124W_chrIV_239899_A_G_72_2	-0.420181	0.524304	-2.30981	0.0340221	0.204912	-3.84502	UpStream	YDL124W	YDL124W	1	TRUE	+	1	73	1	chrIV	239899	A	G	TRUE	0	-1	0	1	0	0	0	0.961	8.96061	FALSE	NA	NA	10	892	190	65	FALSE	FALSE	FALSE	360	NA	FALSE	0.039	0.039	FALSE
chrIV_239907_C_T_+	YDL124W_chrIV_239907_C_T_72_2	-0.82176	-0.177811	-5.71629	2.74326e-05	0.00151354	2.722	UpStream	YDL124W	YDL124W	1	TRUE	+	1	73	1	chrIV	239907	C	T	TRUE	0	0	-1	0	1	0	0	0.792	8.96061	FALSE	NA	NA	10	892	190	65	FALSE	FALSE	FALSE	352	NA	FALSE	0.208	0.208	FALSE
chrIV_239907_C_T_-	YDL125C_5UTR_0_112	-0.152844	0.521831	-2.83347	0.00810208	0.0793893	-3.6436	TSS	YDL125C	YDL125C	1	TRUE	-	3	54	3	chrIV	239907	C	T	TRUE	0	0	-1	0	1	0	0	0.792	8.12814	FALSE	NA	NA	14	559	109	49	FALSE	FALSE	FALSE	301	NA	FALSE	0.208	0.208	FALSE
chrIV_239984_C_T_+	YDL124W_chrIV_239984_C_T_72_2	-0.0277651	1.66241	-0.399311	0.694745	0.899733	-6.62206	UpStream	YDL124W	YDL124W	1	TRUE	+	1	73	1	chrIV	239984	C	T	TRUE	0	0	-1	0	1	0	0	0.971	8.96061	FALSE	NA	NA	10	892	190	65	FALSE	FALSE	FALSE	275	NA	FALSE	0.029	0.029	FALSE
chrIV_240005_CAA_C_+	YDL124W_chrIV_240005_CAA_C_72_2	-0.49053	1.50857	-1.1845	0.252868	0.588976	-4.92466	UpStream	YDL124W	YDL124W	1	TRUE	+	1	72	1	chrIV	240005	CAA	C	FALSE	-2	-2	0	0	0	0	0	0.942	8.96061	FALSE	NA	NA	10	892	190	65	FALSE	FALSE	FALSE	254	NA	FALSE	0.058	0.058	FALSE
chrIV_240090_T_C_+	YDL124W_chrIV_240090_T_C_72_2	0.101542	-0.944036	0.481196	0.636647	0.869819	-5.91267	UpStream	YDL124W	YDL124W	1	TRUE	+	1	73	1	chrIV	240090	T	C	TRUE	0	0	1	0	-1	0	0	0.971	8.96061	FALSE	NA	NA	10	892	190	65	FALSE	FALSE	FALSE	169	NA	FALSE	0.029	0.029	FALSE
chrIV_251392_CT_C_+	YDL116W_5UTR_0_2	0.361228	0.542646	1.30378	0.202092	0.490637	-4.98646	TSS	YDL116W	YDL116W	1	TRUE	+	1	12	1	chrIV	251392	CT	C	FALSE	-1	0	0	0	-1	0	0	0.629	5.86083	FALSE	0.0995952	0.0714085	58	334	228	114	FALSE	TRUE	FALSE	174	1.56	TRUE	0.371	0.371	FALSE
chrIV_255364_G_A_+	YDL114W_chrIV_255364_G_A_72_2	-0.0387116	-0.570352	-0.277113	0.785108	0.93075	-6.58211	UpStream	YDL114W	YDL114W	1	TRUE	+	1	73	1	chrIV	255364	G	A	TRUE	0	1	0	-1	0	0	0	0.435	NA	FALSE	NA	NA	NA	752	107	36	FALSE	TRUE	FALSE	240	1.88	TRUE	0.435	0.435	TRUE
chrIV_258728_G_T_+	YDL112W_chrIV_258728_G_T_72_2	-0.0842868	-0.0714579	-1.15691	0.263658	0.598418	-6.18293	UpStream	YDL112W	YDL112W	1	TRUE	+	1	73	1	chrIV	258728	G	T	TRUE	0	0	0	-1	1	0	-1	0.765	4.90843	FALSE	0.159202	0.114905	12	861	130	42	FALSE	TRUE	FALSE	187	4.19	TRUE	0.235	0.235	FALSE
chrIV_258728_G_T_-	YDL113C_5UTR_0_2	0.036827	-1.13973	0.670574	0.507554	0.761833	-7.15181	TSS	YDL113C	YDL113C	1	TRUE	-	1	35	1	chrIV	258728	G	T	TRUE	0	0	0	-1	1	0	0	0.765	4.96967	FALSE	NA	NA	20	799	200	60	FALSE	FALSE	FALSE	173	4.19	TRUE	0.235	0.235	FALSE
chrIV_258793_G_A_+	YDL112W_chrIV_258793_G_A_72_2	0.101369	-2.00314	1.03492	0.315521	0.653526	-6.29095	UpStream	YDL112W	YDL112W	1	TRUE	+	1	73	1	chrIV	258793	G	A	TRUE	0	1	0	-1	0	0	0	0.678	4.90843	FALSE	0.159202	0.114905	12	861	130	42	FALSE	TRUE	FALSE	122	4.19	TRUE	0.322	0.678	TRUE
chrIV_258800_C_T_+	YDL112W_chrIV_258800_C_T_72_2	0.00548942	-1.54327	0.0540672	0.957526	0.984626	-6.78176	UpStream	YDL112W	YDL112W	1	TRUE	+	1	73	1	chrIV	258800	C	T	TRUE	0	0	-1	0	1	0	0	0.685	4.90843	FALSE	0.159202	0.114905	12	861	130	42	FALSE	TRUE	FALSE	115	4.19	TRUE	0.315	0.685	TRUE
chrIV_258800_C_T_-	YDL113C_chrIV_258800_C_T_72_2	-0.0926849	-0.616852	-1.15567	0.264148	0.598924	-5.93317	UpStream	YDL113C	YDL113C	1	TRUE	-	1	73	1	chrIV	258800	C	T	TRUE	0	0	-1	0	1	0	0	0.685	4.96967	FALSE	NA	NA	20	799	200	60	FALSE	FALSE	FALSE	245	4.19	TRUE	0.315	0.685	TRUE
chrIV_258830_C_A_+	YDL112W_chrIV_258830_C_A_72_2	-0.183662	-1.62391	-1.84129	0.0834877	0.324158	-5.16285	UpStream	YDL112W	YDL112W	1	TRUE	+	1	73	1	chrIV	258830	C	A	TRUE	0	1	-1	0	0	0	0	0.484	4.90843	FALSE	0.159202	0.114905	12	861	130	42	FALSE	TRUE	FALSE	85	5.93	TRUE	0.484	0.484	TRUE
chrIV_264197_G_A_-	YDL111C_5UTR_0_21	0.166214	-0.409088	1.51558	0.139954	0.407249	-5.38585	TSS	YDL111C	YDL111C	1	TRUE	-	2	127	1	chrIV	264197	G	A	TRUE	0	1	0	-1	0	0	0	0.98	6.88636	TRUE	0.0403902	0.0297883	28	1172	403	150	FALSE	FALSE	FALSE	87	NA	FALSE	0.02	0.02	FALSE
chrIV_264290_G_A_-	YDL111C_5UTR_0_12	0.138443	-0.418992	1.41234	0.168003	0.450326	-5.57753	TSS	YDL111C	YDL111C	1	TRUE	-	2	34	2	chrIV	264290	G	A	TRUE	0	1	0	-1	0	0	0	0.98	6.88636	TRUE	0.0403902	0.0297883	28	1172	403	150	FALSE	FALSE	FALSE	180	NA	FALSE	0.02	0.02	FALSE
chrIV_265022_AC_A_-	YDL110C_5UTR_0_2	0.166586	1.17942	2.6605	0.0123392	0.103739	-3.59147	TSS	YDL110C	YDL110C	1	TRUE	-	1	144	1	chrIV	265022	AC	A	FALSE	-1	0	-1	0	0	0	0	0.029	7.81958	FALSE	0.0646797	0.0449083	16	854	151	62	FALSE	FALSE	FALSE	58	4.83	TRUE	0.029	0.029	TRUE
chrIV_267372_G_A_+	YDL108W_chrIV_267372_G_A_72_2	-0.304674	0.0274213	-3.76915	0.00158181	0.0292112	-1.40158	UpStream	YDL108W	YDL108W	1	TRUE	+	1	73	1	chrIV	267372	G	A	TRUE	0	1	0	-1	0	0	0	0.167	5.62882	TRUE	NA	NA	54	1185	790	467	FALSE	TRUE	FALSE	326	6.82	TRUE	0.167	0.167	TRUE
chrIV_267474_A_AT_+	YDL108W_chrIV_267474_A_AT_72_2	0.284718	-1.4344	2.19547	0.042628	0.230456	-4.23933	UpStream	YDL108W	YDL108W	1	TRUE	+	1	73	1	chrIV	267474	A	AT	FALSE	1	0	0	0	1	0	0	0.563	5.62882	TRUE	NA	NA	54	1185	790	467	FALSE	TRUE	FALSE	224	2.98	TRUE	0.437	NA	NA
chrIV_268714_A_G_+	YDL107W_5UTR_0_21	-0.302106	-1.2018	-3.30492	0.00244176	0.0349563	-1.97438	TSS	YDL107W	YDL107W	1	TRUE	+	2	9	1	chrIV	268714	A	G	TRUE	0	-1	0	1	0	0	0	0.688	4.77474	FALSE	0.132207	0.102983	6	764	295	124	FALSE	FALSE	FALSE	207	9.91	TRUE	0.312	0.312	FALSE
chrIV_268735_G_T_+	YDL107W_5UTR_0_12	0.0118127	-1.04419	0.11382	0.910129	0.965143	-6.64045	TSS	YDL107W	YDL107W	1	TRUE	+	2	30	2	chrIV	268735	G	T	TRUE	0	0	0	-1	1	0	0	0.681	4.77474	FALSE	0.132207	0.102983	6	764	295	124	FALSE	FALSE	FALSE	186	9.91	TRUE	0.319	0.681	TRUE
chrIV_272291_A_G_+	YDL105W_5UTR_0_2	-0.0806267	-0.992188	-0.698079	0.490432	0.752007	-6.6473	TSS	YDL105W	YDL105W	1	TRUE	+	1	91	1	chrIV	272291	A	G	TRUE	0	-1	0	1	0	0	0	0.571	4.6021	TRUE	NA	NA	11	3201	1314	584	FALSE	FALSE	FALSE	98	NA	FALSE	0.429	0.571	TRUE
chrIV_272291_A_G_-	YDL106C_chrIV_272291_A_G_72_2	0.19417	-1.45013	1.87559	0.0783798	0.310565	-4.8943	UpStream	YDL106C	YDL106C	1	TRUE	-	1	73	1	chrIV	272291	A	G	TRUE	0	-1	0	1	0	0	0	0.571	5.11602	FALSE	NA	NA	32	903	278	114	TRUE	FALSE	FALSE	390	NA	FALSE	0.429	0.571	TRUE
chrIV_275006_CG_C_-	YDL104C_5UTR_0_2	-0.0138094	-0.884101	-0.241997	0.810407	0.926386	-7.28893	TSS	YDL104C	YDL104C	1	TRUE	-	1	34	1	chrIV	275006	CG	C	FALSE	-1	0	0	-1	0	0	0	0.97	4.15447	FALSE	NA	NA	3	1514	441	154	FALSE	TRUE	FALSE	130	NA	FALSE	0.03	0.03	FALSE
chrIV_275038_G_A_-	YDL104C_chrIV_275038_G_A_72_2	0.15734	-0.588384	1.46176	0.162445	0.46988	-5.62577	UpStream	YDL104C	YDL104C	1	TRUE	-	1	73	1	chrIV	275038	G	A	TRUE	0	1	0	-1	0	0	0	0.374	4.15447	FALSE	NA	NA	3	1514	441	154	FALSE	TRUE	FALSE	162	1.16	TRUE	0.374	0.374	TRUE
chrIV_276645_G_A_+	YDL102W_chrIV_276645_G_A_72_2	-0.1786	-0.828907	-1.90546	0.0741584	0.304049	-5.02988	UpStream	YDL102W	YDL102W	1	TRUE	+	1	73	1	chrIV	276645	G	A	TRUE	0	1	0	-1	0	0	0	0.316	4.68159	TRUE	NA	NA	9	2523	1070	457	FALSE	TRUE	FALSE	227	11.15	TRUE	0.316	0.316	TRUE
chrIV_276806_G_A_-	YDL103C_chrIV_276806_G_A_72_2	-0.00984297	-1.9956	-0.0701861	0.944883	0.981349	-6.44345	UpStream	YDL103C	YDL103C	1	TRUE	-	1	73	1	chrIV	276806	G	A	TRUE	0	1	0	-1	0	0	0	0.336	6.07954	TRUE	0.0809681	0.0579786	21	2206	701	314	FALSE	TRUE	FALSE	225	8.58	TRUE	0.336	0.336	TRUE
chrIV_276820_G_A_-	YDL103C_chrIV_276820_G_A_72_2	0.143948	-1.01751	1.50402	0.151329	0.449961	-5.57694	UpStream	YDL103C	YDL103C	1	TRUE	-	1	73	1	chrIV	276820	G	A	TRUE	0	1	0	-1	0	0	0	0.336	6.07954	TRUE	0.0809681	0.0579786	21	2206	701	314	FALSE	TRUE	FALSE	239	8.58	TRUE	0.336	0.336	TRUE
chrIV_283285_GA_G_-	YDL100C_5UTR_0_2	-0.0067102	0.153663	-0.0559828	0.955722	0.987582	-6.45213	TSS	YDL100C	YDL100C	1	TRUE	-	1	72	1	chrIV	283285	GA	G	FALSE	-1	-1	0	0	0	0	0	0.646	8.35411	FALSE	0.0362762	0.0219365	57	1235	549	258	FALSE	TRUE	FALSE	109	NA	FALSE	0.354	NA	NA
chrIV_283285_GA_G_+	YDL099W_5UTR_0_2	-0.00715532	0.15543	-0.0796127	0.937067	0.978664	-6.53467	TSS	YDL099W	YDL099W	1	TRUE	+	1	65	1	chrIV	283285	GA	G	FALSE	-1	-1	0	0	0	0	0	0.646	6.90027	FALSE	0.249136	0.194964	14	851	152	64	FALSE	FALSE	FALSE	134	NA	FALSE	0.354	NA	NA
chrIV_285234_C_T_-	YDL098C_5UTR_0_2	0.0604538	0.291899	0.691043	0.494781	0.754224	-6.36938	TSS	YDL098C	YDL098C	1	TRUE	-	1	86	1	chrIV	285234	C	T	TRUE	0	0	-1	0	1	0	0	0.083	5.18509	TRUE	0.127016	0.102096	15	1041	343	178	FALSE	FALSE	FALSE	69	3.88	TRUE	0.083	0.083	TRUE
chrIV_286882_CTTT_CT_-	YDL097C_chrIV_286882_CTTT_CT_72_2	0.285708	0.864635	0.885808	0.38835	0.719841	-5.38094	UpStream	YDL097C	YDL097C	1	TRUE	-	1	74	1	chrIV	286882	CTTT	CT	FALSE	-2	0	0	0	-2	0	0	0.525	7.83448	TRUE	NA	NA	60	2201	1076	512	FALSE	TRUE	FALSE	187	2.49	TRUE	0.475	NA	NA
chrIV_289631_T_C_+	YDL093W_chrIV_289631_T_C_72_2	-0.0352664	-1.26411	-0.269575	0.790803	0.931685	-6.61875	UpStream	YDL093W	YDL093W	1	TRUE	+	1	73	1	chrIV	289631	T	C	TRUE	0	0	1	0	-1	0	0	0.318	4.75972	FALSE	NA	NA	5	755	205	74	FALSE	FALSE	FALSE	278	3.55	TRUE	0.318	0.318	TRUE
chrIV_292597_C_T_+	YDL092W_chrIV_292597_C_T_72_2	0.0359566	-0.126787	0.49687	0.625784	0.864225	-6.71669	UpStream	YDL092W	YDL092W	1	TRUE	+	1	73	1	chrIV	292597	C	T	TRUE	0	0	-1	0	1	0	0	0.77	7.57196	TRUE	NA	NA	28	NA	NA	NA	FALSE	FALSE	FALSE	184	1.99	TRUE	0.23	0.77	TRUE
chrIV_292644_C_T_+	YDL092W_5UTR_0_21	-0.0156629	0.372397	-0.289663	0.77404	0.9109	-7.18154	TSS	YDL092W	YDL092W	1	TRUE	+	2	31	1	chrIV	292644	C	T	TRUE	0	0	-1	0	1	0	0	0.561	7.57196	TRUE	NA	NA	28	NA	NA	NA	FALSE	FALSE	FALSE	137	1.99	TRUE	0.439	0.561	TRUE
chrIV_292751_A_G_+	YDL092W_5UTR_0_12	0.129544	0.446971	2.585	0.0147708	0.116744	-4.0551	TSS	YDL092W	YDL092W	1	TRUE	+	2	138	2	chrIV	292751	A	G	TRUE	0	-1	0	1	0	0	0	0.99	7.57196	TRUE	NA	NA	28	NA	NA	NA	FALSE	FALSE	FALSE	30	NA	FALSE	0.01	0.01	FALSE
chrIV_300148_T_A_-	YDL088C_5UTR_0_211	-0.0902247	0.634241	-1.2553	0.218933	0.511125	-6.0336	TSS	YDL088C	YDL088C	1	TRUE	-	3	128	1	chrIV	300148	T	A	TRUE	0	1	0	0	-1	0	1	0.014	5.68072	FALSE	0.16189	0.126104	32	1031	266	88	FALSE	FALSE	TRUE	145	NA	FALSE	0.014	NA	NA
chrIV_300204_A_T_-	YDL088C_5UTR_0_121	0.0392361	0.708738	0.516586	0.609182	0.835458	-6.59749	TSS	YDL088C	YDL088C	1	TRUE	-	3	72	2	chrIV	300204	A	T	TRUE	0	-1	0	0	1	0	0	0.991	5.68072	FALSE	0.16189	0.126104	32	1031	266	88	FALSE	FALSE	TRUE	201	NA	FALSE	0.009	0.009	FALSE
chrIV_300254_C_T_-	YDL088C_5UTR_0_112	-0.0817582	0.639248	-0.928998	0.360207	0.656199	-6.40961	TSS	YDL088C	YDL088C	1	TRUE	-	3	22	3	chrIV	300254	C	T	TRUE	0	0	-1	0	1	0	0	0.647	5.68072	FALSE	0.16189	0.126104	32	1031	266	88	FALSE	FALSE	TRUE	251	NA	FALSE	0.353	0.647	TRUE
chrIV_301279_C_A_+	YDL086W_5UTR_0_2	0.164025	0.979314	1.46259	0.15384	0.429036	-5.27891	TSS	YDL086W	YDL086W	1	TRUE	+	1	16	1	chrIV	301279	C	A	TRUE	0	1	-1	0	0	0	0	0.64	7.4109	FALSE	0.0169674	0.0121609	7	864	116	29	FALSE	FALSE	FALSE	134	0.73	TRUE	0.36	0.64	TRUE
chrIV_302207_C_T_-	YDL086C-A_chrIV_302207_C_T_72_2	-0.358927	-1.65915	-4.23776	0.000579638	0.0137947	-0.265371	UpStream	YDL086C-A	YDL086C-A	1	TRUE	-	1	73	1	chrIV	302207	C	T	TRUE	0	0	-1	0	1	0	0	0.746	1.4189	FALSE	NA	NA	NA	NA	NA	NA	FALSE	FALSE	FALSE	118	2.26	TRUE	0.254	0.254	FALSE
chrIV_302250_C_T_-	YDL086C-A_chrIV_302250_C_T_72_2	-0.327344	-2.11086	-2.16109	0.0455848	0.241373	-4.53128	UpStream	YDL086C-A	YDL086C-A	1	TRUE	-	1	73	1	chrIV	302250	C	T	TRUE	0	0	-1	0	1	0	0	0.898	1.4189	FALSE	NA	NA	NA	NA	NA	NA	FALSE	FALSE	FALSE	161	2.26	TRUE	0.102	0.102	FALSE
chrIV_302347_TA_T_-	YDL086C-A_chrIV_302347_TA_T_72_2	0.128744	0.912627	0.383865	0.705942	0.905428	-5.36232	UpStream	YDL086C-A	YDL086C-A	1	TRUE	-	1	74	1	chrIV	302347	TA	T	FALSE	-1	-1	0	0	0	0	0	0.782	1.4189	FALSE	NA	NA	NA	NA	NA	NA	FALSE	FALSE	FALSE	258	3.34	TRUE	0.218	NA	NA
chrIV_302749_C_T_-	YDL085C-A_chrIV_302749_C_T_72_2	0.0574822	-0.712179	0.4382	0.66688	0.882786	-6.62697	UpStream	YDL085C-A	YDL085C-A	1	TRUE	-	1	73	1	chrIV	302749	C	T	TRUE	0	0	-1	0	1	0	0	0.661	6.86056	FALSE	0.0676801	0.0391884	7	203	51	15	FALSE	FALSE	FALSE	79	3.03	TRUE	0.339	NA	NA
chrIV_302868_G_T_+	YDL085W_5UTR_0_2	-0.266872	-1.20688	-2.12772	0.0415791	0.217199	-4.72226	TSS	YDL085W	YDL085W	1	TRUE	+	1	96	1	chrIV	302868	G	T	TRUE	0	0	0	-1	1	0	0	0.612	2.8622	FALSE	0.0587916	0.0436053	13	859	131	50	FALSE	FALSE	TRUE	343	NA	FALSE	0.388	0.612	TRUE
chrIV_302927_C_A_-	YDL085C-A_chrIV_302927_C_A_72_2	0.0226219	-0.840469	0.167276	0.86917	0.956036	-6.83691	UpStream	YDL085C-A	YDL085C-A	1	TRUE	-	1	73	1	chrIV	302927	C	A	TRUE	0	1	-1	0	0	0	0	0.646	6.86056	FALSE	0.0676801	0.0391884	7	203	51	15	FALSE	FALSE	FALSE	257	1.47	TRUE	0.354	0.646	TRUE
chrIV_303011_T_TTA_-	YDL085C-A_chrIV_303011_T_TTA_72_2	-0.041795	-0.725387	-0.267105	0.792672	0.932158	-6.64751	UpStream	YDL085C-A	YDL085C-A	1	TRUE	-	1	73	1	chrIV	303011	T	TTA	FALSE	2	1	0	0	1	0	0	0.486	6.86056	FALSE	0.0676801	0.0391884	7	203	51	15	FALSE	FALSE	FALSE	341	1.47	TRUE	0.486	NA	NA
chrIV_303051_C_A_-	YDL085C-A_chrIV_303051_C_A_72_2	-0.0109192	-1.27645	-0.060473	0.9525	0.982751	-6.62429	UpStream	YDL085C-A	YDL085C-A	1	TRUE	-	1	73	1	chrIV	303051	C	A	TRUE	0	1	-1	0	0	0	0	0.979	6.86056	FALSE	0.0676801	0.0391884	7	203	51	15	FALSE	FALSE	FALSE	381	1.88	TRUE	0.021	0.021	FALSE
chrIV_308096_C_T_-	YDL083C_chrIV_308096_C_T_72_2	-0.00979017	1.21067	-0.145708	0.885903	0.96203	-6.78743	UpStream	YDL083C	YDL083C	1	TRUE	-	1	73	1	chrIV	308096	C	T	TRUE	0	0	-1	0	1	0	-1	0.585	10.7862	FALSE	NA	NA	29	999	431	176	FALSE	TRUE	TRUE	307	2.27	TRUE	0.415	0.585	TRUE
chrIV_310329_A_T_-	YDL081C_5UTR_0_2	0.104593	1.56297	0.593959	0.556933	0.800296	-5.77731	TSS	YDL081C	YDL081C	1	TRUE	-	1	4	1	chrIV	310329	A	T	TRUE	0	-1	0	0	1	0	-1	0.94	11.2947	FALSE	NA	NA	26	742	529	296	FALSE	FALSE	FALSE	207	1.21	TRUE	0.06	0.06	FALSE
chrIV_326534_A_C_+	YDL073W_chrIV_326534_A_C_72_2	0.0212492	-0.597121	0.169427	0.867504	0.956036	-6.62992	UpStream	YDL073W	YDL073W	1	TRUE	+	1	73	1	chrIV	326534	A	C	TRUE	0	-1	1	0	0	0	0	0.45	4.94378	FALSE	0.162287	0.123158	5	432	134	54	FALSE	FALSE	FALSE	79	1.83	TRUE	0.45	0.45	TRUE
chrIV_339391_A_G_+	YDL062W_chrIV_339391_A_G_72_2	0.0633874	-0.64216	0.563746	0.58045	0.838075	-6.71033	UpStream	YDL062W	YDL062W	1	TRUE	+	1	73	1	chrIV	339391	A	G	TRUE	0	-1	0	1	0	0	0	0.989	NA	FALSE	NA	NA	NA	647	348	159	FALSE	FALSE	FALSE	466	4.09	TRUE	0.011	0.011	FALSE
chrIV_366354_C_A_-	YDL049C_chrIV_366354_C_A_72_2	-0.217557	2.02218	-2.52759	0.0219366	0.157063	-3.79562	UpStream	YDL049C	YDL049C	1	TRUE	-	1	73	1	chrIV	366354	C	A	TRUE	0	1	-1	0	0	0	1	0.559	5.75882	FALSE	0.0805128	0.0616984	2	105	29	15	FALSE	FALSE	FALSE	480	3.9	TRUE	0.441	0.559	TRUE
chrIV_366464_C_T_-	YDL049C_chrIV_366464_C_T_72_2	-0.0442168	0.816591	-0.373319	0.713627	0.908174	-6.43743	UpStream	YDL049C	YDL049C	1	TRUE	-	1	73	1	chrIV	366464	C	T	TRUE	0	0	-1	0	1	0	0	0.57	5.75882	FALSE	0.0805128	0.0616984	2	105	29	15	FALSE	FALSE	FALSE	590	NA	FALSE	0.43	0.57	TRUE
chrIV_368819_TA_T_+	YDL047W_chrIV_368819_TA_T_72_2	0.00209577	0.714399	0.0305058	0.976027	0.991568	-6.77182	UpStream	YDL047W	YDL047W	1	TRUE	+	1	72	1	chrIV	368819	TA	T	FALSE	-1	-1	0	0	0	0	0	0.553	7.01813	FALSE	NA	NA	74	NA	NA	NA	FALSE	TRUE	FALSE	952	NA	FALSE	0.447	0.553	TRUE
chrIV_369403_G_C_+	YDL047W_chrIV_369403_G_C_72_2	-0.126069	0.688891	-1.01473	0.324771	0.662741	-5.95459	UpStream	YDL047W	YDL047W	1	TRUE	+	1	73	1	chrIV	369403	G	C	TRUE	0	0	1	-1	0	0	0	0.149	7.01813	FALSE	NA	NA	74	NA	NA	NA	FALSE	TRUE	FALSE	368	NA	FALSE	0.149	0.149	TRUE
chrIV_370771_A_G_+	YDL046W_chrIV_370771_A_G_72_2	0.0210133	-0.483379	0.164664	0.871194	0.956036	-6.6409	UpStream	YDL046W	YDL046W	1	TRUE	+	1	73	1	chrIV	370771	A	G	TRUE	0	-1	0	1	0	0	0	0.586	8.11983	FALSE	0.0804691	0.055484	6	NA	NA	NA	FALSE	FALSE	FALSE	469	0.95	TRUE	0.414	0.586	TRUE
chrIV_370874_AAT_A_+	YDL046W_chrIV_370874_AAT_A_72_2	-0.0531249	-0.602939	-0.451418	0.657519	0.876627	-6.45651	UpStream	YDL046W	YDL046W	1	TRUE	+	1	72	1	chrIV	370874	AAT	A	FALSE	-2	-1	0	0	-1	0	0	0.34	8.11983	FALSE	0.0804691	0.055484	6	NA	NA	NA	FALSE	FALSE	FALSE	366	3.22	TRUE	0.34	NA	NA
chrIV_370914_T_C_+	YDL046W_chrIV_370914_T_C_72_2	-0.389354	-1.30451	-1.77416	0.0943439	0.34531	-4.49183	UpStream	YDL046W	YDL046W	1	TRUE	+	1	73	1	chrIV	370914	T	C	TRUE	0	0	1	0	-1	0	0	0.591	8.11983	FALSE	0.0804691	0.055484	6	NA	NA	NA	FALSE	FALSE	FALSE	326	3.22	TRUE	0.409	0.409	FALSE
chrIV_371085_T_C_+	YDL046W_chrIV_371085_T_C_72_2	-0.0553428	0.117703	-0.688128	0.500859	0.796599	-6.44453	UpStream	YDL046W	YDL046W	1	TRUE	+	1	73	1	chrIV	371085	T	C	TRUE	0	0	1	0	-1	0	0	0.918	8.11983	FALSE	0.0804691	0.055484	6	NA	NA	NA	FALSE	FALSE	FALSE	155	NA	FALSE	0.082	0.082	FALSE
chrIV_371142_A_G_+	YDL046W_chrIV_371142_A_G_72_2	0.0528346	-0.905387	0.601589	0.55556	0.825399	-6.53537	UpStream	YDL046W	YDL046W	1	TRUE	+	1	73	1	chrIV	371142	A	G	TRUE	0	-1	0	1	0	0	0	0.627	8.11983	FALSE	0.0804691	0.055484	6	NA	NA	NA	FALSE	FALSE	FALSE	98	NA	FALSE	0.373	0.627	TRUE
chrIV_372110_C_T_+	YDL045W-A_5UTR_0_2	-0.106958	-0.384764	-0.689664	0.495636	0.754835	-5.98149	TSS	YDL045W-A	YDL045W-A	1	TRUE	+	1	31	1	chrIV	372110	C	T	TRUE	0	0	-1	0	1	0	0	0.006924	6.85849	FALSE	0.0133034	0.0101068	12	452	244	91	FALSE	FALSE	FALSE	138	0.61	TRUE	0.006924	0.006924	TRUE
chrIV_373723_T_C_-	YDL045C_5UTR_0_2	0.0681573	-0.39307	0.915057	0.367362	0.662559	-6.74608	TSS	YDL045C	YDL045C	1	TRUE	-	1	140	1	chrIV	373723	T	C	TRUE	0	0	1	0	-1	0	0	0.935	5.77541	TRUE	0.0688853	0.0496429	3	866	341	173	FALSE	TRUE	FALSE	115	1.93	TRUE	0.065	0.065	FALSE
chrIV_375394_A_C_-	YDL044C_5UTR_0_2	-0.146687	-0.380158	-2.44953	0.0202741	0.143352	-4.4695	TSS	YDL044C	YDL044C	1	TRUE	-	1	65	1	chrIV	375394	A	C	TRUE	0	-1	1	0	0	0	1	0.094	4.78333	FALSE	0.163783	0.124086	10	806	67	16	FALSE	FALSE	FALSE	105	NA	FALSE	0.094	0.094	TRUE
chrIV_384191_C_G_-	YDL039C_chrIV_384191_C_G_72_2	-0.0893521	-0.463832	-0.64703	0.526443	0.80737	-6.48752	UpStream	YDL039C	YDL039C	1	TRUE	-	1	73	1	chrIV	384191	C	G	TRUE	0	0	-1	1	0	0	0	0.732	2.72687	FALSE	NA	NA	7	905	262	88	FALSE	FALSE	FALSE	110	2.48	TRUE	0.268	NA	NA
chrIV_386154_CAAA_CA_-	YDL037C_chrIV_386154_CAAA_CA_72_2	0.592635	0.146794	4.31881	0.000487777	0.0119773	-0.0382688	UpStream	YDL037C	YDL037C	1	TRUE	-	1	74	1	chrIV	386154	CAAA	CA	FALSE	-2	-2	0	0	0	0	0	0.56	NA	FALSE	NA	NA	5	652	101	40	FALSE	FALSE	FALSE	567	NA	FALSE	0.44	NA	NA
chrIV_404459_A_T_+	YDL026W_chrIV_404459_A_T_72_2	-0.00524807	-0.760022	-0.0582391	0.954252	0.983296	-6.7753	UpStream	YDL026W	YDL026W	1	TRUE	+	1	73	1	chrIV	404459	A	T	TRUE	0	-1	0	0	1	0	1	0.981	NA	FALSE	NA	NA	NA	478	45	6	FALSE	FALSE	FALSE	290	0.96	TRUE	0.019	0.019	FALSE
chrIV_413029_C_T_+	YDL021W_chrIV_413029_C_T_72_2	0.0483187	-1.95799	0.305587	0.763711	0.922329	-6.47936	UpStream	YDL021W	YDL021W	1	TRUE	+	1	73	1	chrIV	413029	C	T	TRUE	0	0	-1	0	1	0	0	0.028	5.50128	FALSE	NA	NA	4	442	102	35	FALSE	FALSE	TRUE	924	4.28	TRUE	0.028	0.028	TRUE
chrIV_425975_C_T_-	YDL016C_chrIV_425975_C_T_72_2	0.144782	-0.841706	0.971971	0.34499	0.681102	-6.07929	UpStream	YDL016C	YDL016C	1	TRUE	-	1	73	1	chrIV	425975	C	T	TRUE	0	0	-1	0	1	0	-1	0.164	NA	TRUE	NA	NA	NA	NA	NA	NA	FALSE	FALSE	FALSE	103	2.92	TRUE	0.164	0.164	TRUE
chrIV_428805_ATT_ATTT_+	YDL013W_5UTR_0_21	-0.157006	0.397332	-0.912717	0.368572	0.662559	-5.72738	TSS	YDL013W	YDL013W	1	TRUE	+	2	18	1	chrIV	428805	ATT	ATTT	FALSE	1	0	0	0	1	0	0	0.094	5.33	FALSE	NA	NA	50	1672	1122	541	FALSE	FALSE	FALSE	262	3.58	TRUE	0.094	NA	NA
chrIV_428826_C_T_+	YDL013W_5UTR_0_12	-0.146128	0.382783	-1.01842	0.316515	0.611861	-5.71357	TSS	YDL013W	YDL013W	1	TRUE	+	2	39	2	chrIV	428826	C	T	TRUE	0	0	-1	0	1	0	0	0.009911	5.33	FALSE	NA	NA	50	1672	1122	541	FALSE	FALSE	FALSE	241	3.58	TRUE	0.009911	0.009911	TRUE
chrIV_431592_T_TTG_-	YDL012C_chrIV_431592_T_TTG_72_2	0.116988	-0.68309	1.60985	0.126246	0.411248	-5.42478	UpStream	YDL012C	YDL012C	1	TRUE	-	1	73	1	chrIV	431592	T	TTG	FALSE	2	0	0	1	1	-1	0	0.985	6.5623	FALSE	NA	NA	11	795	150	63	FALSE	FALSE	TRUE	75	NA	FALSE	0.015	0.015	FALSE
chrIV_431674_G_C_-	YDL012C_chrIV_431674_G_C_72_2	0.0556784	0.601148	0.68514	0.502694	0.796599	-6.50241	UpStream	YDL012C	YDL012C	1	TRUE	-	1	73	1	chrIV	431674	G	C	TRUE	0	0	1	-1	0	0	0	0.953	6.5623	FALSE	NA	NA	11	795	150	63	FALSE	FALSE	TRUE	157	NA	FALSE	0.047	0.047	FALSE
chrIV_431960_G_A_-	YDL012C_chrIV_431960_G_A_72_2	-0.403617	-0.51965	-3.58506	0.00234972	0.0389771	-1.70894	UpStream	YDL012C	YDL012C	1	TRUE	-	1	73	1	chrIV	431960	G	A	TRUE	0	1	0	-1	0	0	0	0.521	6.5623	FALSE	NA	NA	11	795	150	63	FALSE	FALSE	TRUE	443	4.66	TRUE	0.479	0.521	TRUE
chrIV_432137_CAGTT_C_-	YDL012C_chrIV_432137_CAGTT_C_72_2	0.229258	0.299715	2.31113	0.0339325	0.204912	-4.19368	UpStream	YDL012C	YDL012C	1	TRUE	-	1	75	1	chrIV	432137	CAGTT	C	FALSE	-4	-1	0	-1	-2	0	0	0.954	6.5623	FALSE	NA	NA	11	795	150	63	FALSE	FALSE	TRUE	620	NA	FALSE	0.046	0.046	FALSE
chrIV_432174_C_T_-	YDL012C_chrIV_432174_C_T_72_2	-0.0229609	0.715426	-0.220021	0.828533	0.945153	-6.39377	UpStream	YDL012C	YDL012C	1	TRUE	-	1	73	1	chrIV	432174	C	T	TRUE	0	0	-1	0	1	0	0	0.431	6.5623	FALSE	NA	NA	11	795	150	63	FALSE	FALSE	TRUE	657	NA	FALSE	0.431	0.431	TRUE
chrIV_433376_G_A_+	YDL008W_5UTR_0_211	0.262478	-0.296097	2.02832	0.0513652	0.239468	-4.23175	TSS	YDL008W	YDL008W	1	TRUE	+	3	54	1	chrIV	433376	G	A	TRUE	0	1	0	-1	0	0	0	0.968	6.01252	TRUE	NA	NA	25	1229	937	597	FALSE	TRUE	FALSE	121	NA	FALSE	0.032	0.032	FALSE
chrIV_433396_A_G_+	YDL008W_5UTR_0_121	-0.376651	-0.554259	-1.37831	0.178165	0.462557	-5.00365	TSS	YDL008W	YDL008W	1	TRUE	+	3	74	2	chrIV	433396	A	G	TRUE	0	-1	0	1	0	0	0	0.987	6.01252	TRUE	NA	NA	25	1229	937	597	FALSE	TRUE	FALSE	101	NA	FALSE	0.013	0.013	FALSE
chrIV_433401_C_T_+	YDL008W_5UTR_0_112	-0.365699	-0.610189	-1.3704	0.180596	0.464343	-5.05517	TSS	YDL008W	YDL008W	1	TRUE	+	3	79	3	chrIV	433401	C	T	TRUE	0	0	-1	0	1	0	0	0.926	6.01252	TRUE	NA	NA	25	1229	937	597	FALSE	TRUE	FALSE	96	NA	FALSE	0.074	0.074	FALSE
chrIV_434776_T_A_-	tT(AGU)D_chrIV_434776_T_A_72_2	-0.0268675	-2.32212	-0.312821	0.758305	0.922026	-6.67806	UpStream	tT(AGU)D	tT(AGU)D	1	TRUE	-	1	73	1	chrIV	434776	T	A	TRUE	0	1	0	0	-1	0	0	0.933	NA	FALSE	NA	NA	1	NA	NA	NA	FALSE	FALSE	FALSE	440	1.83	TRUE	0.067	NA	NA
chrIV_435072_T_C_-	tT(AGU)D_chrIV_435072_T_C_72_2	0.147548	-2.1642	1.23755	0.23307	0.564797	-5.9445	UpStream	tT(AGU)D	tT(AGU)D	1	TRUE	-	1	73	1	chrIV	435072	T	C	TRUE	0	0	1	0	-1	0	0	0.939	NA	FALSE	NA	NA	1	NA	NA	NA	FALSE	FALSE	FALSE	736	3.87	TRUE	0.061	NA	NA
chrIV_435246_T_C_-	tT(AGU)D_chrIV_435246_T_C_72_2	0.68755	-1.42298	5.20502	7.66878e-05	0.00295446	1.69179	UpStream	tT(AGU)D	tT(AGU)D	1	TRUE	-	1	73	1	chrIV	435246	T	C	TRUE	0	0	1	0	-1	0	1	0.576	NA	FALSE	NA	NA	1	NA	NA	NA	FALSE	FALSE	FALSE	910	NA	FALSE	0.424	0.576	TRUE
chrIV_436994_T_C_-	YDL007C-A_chrIV_436994_T_C_72_2	0.00336085	-1.07982	0.0241257	0.981039	0.992944	-6.80083	UpStream	YDL007C-A	YDL007C-A	1	TRUE	-	1	73	1	chrIV	436994	T	C	TRUE	0	0	1	0	-1	0	0	0.957	NA	FALSE	NA	NA	NA	NA	NA	NA	FALSE	FALSE	FALSE	170	NA	FALSE	0.043	0.043	FALSE
chrIV_437035_C_A_+	tS(AGA)D1_chrIV_437035_C_A_72_2	0.224352	-2.69125	0.597063	0.558507	0.827121	-6.03918	UpStream	tS(AGA)D1	tS(AGA)D1	1	TRUE	+	1	73	1	chrIV	437035	C	A	TRUE	0	1	-1	0	0	0	0	0.934	NA	FALSE	NA	NA	NA	NA	NA	NA	FALSE	FALSE	FALSE	737	NA	FALSE	0.066	NA	NA
chrIV_437881_C_T_+	YDL007W_5UTR_0_2111	-0.0264404	0.889237	-0.371687	0.712704	0.884612	-6.89932	TSS	YDL007W	YDL007W	1	TRUE	+	4	12	1	chrIV	437881	C	T	TRUE	0	0	-1	0	1	0	0	0.944	8.04082	TRUE	NA	NA	54	1322	387	177	FALSE	TRUE	FALSE	166	2.57	TRUE	0.056	0.056	FALSE
chrIV_437890_T_C_+	YDL007W_5UTR_0_1211	0.0143603	0.909916	0.219738	0.827544	0.934754	-6.89698	TSS	YDL007W	YDL007W	1	TRUE	+	4	21	2	chrIV	437890	T	C	TRUE	0	0	1	0	-1	0	0	0.451	8.04082	TRUE	NA	NA	54	1322	387	177	FALSE	TRUE	FALSE	157	2.57	TRUE	0.451	0.451	TRUE
chrIV_437896_G_A_+	YDL007W_5UTR_0_1121	-0.0170103	0.89109	-0.312468	0.756818	0.901435	-6.91269	TSS	YDL007W	YDL007W	1	TRUE	+	4	27	3	chrIV	437896	G	A	TRUE	0	1	0	-1	0	0	0	0.954	8.04082	TRUE	NA	NA	54	1322	387	177	FALSE	TRUE	FALSE	151	2.57	TRUE	0.046	0.046	FALSE
chrIV_437955_A_G_+	YDL007W_5UTR_0_1112	0.0295135	0.91609	0.381772	0.705285	0.882788	-6.90015	TSS	YDL007W	YDL007W	1	TRUE	+	4	86	4	chrIV	437955	A	G	TRUE	0	-1	0	1	0	0	0	0.989	8.04082	TRUE	NA	NA	54	1322	387	177	FALSE	TRUE	FALSE	92	NA	FALSE	0.011	0.011	FALSE
chrIV_439479_A_G_+	YDL006W_5UTR_0_2	-0.0754027	-0.335274	-0.915106	0.367336	0.662559	-6.46868	TSS	YDL006W	YDL006W	1	TRUE	+	1	36	1	chrIV	439479	A	G	TRUE	0	-1	0	1	0	0	0	0.945	5.78903	FALSE	0.0363726	0.0268095	41	1489	955	551	FALSE	TRUE	FALSE	430	NA	FALSE	0.055	0.055	FALSE
chrIV_442843_T_C_+	YDL004W_5UTR_0_21	0.108612	0.020318	1.66056	0.107081	0.358313	-5.51433	TSS	YDL004W	YDL004W	1	TRUE	+	2	2	1	chrIV	442843	T	C	TRUE	0	0	1	0	-1	0	0	0.541	8.86242	TRUE	0.0582286	0.0375691	13	NA	NA	NA	FALSE	TRUE	FALSE	186	NA	FALSE	0.459	0.541	TRUE
chrIV_442926_T_C_+	YDL004W_5UTR_0_12	0.00142504	-0.0309245	0.0220815	0.982527	0.994656	-6.90818	TSS	YDL004W	YDL004W	1	TRUE	+	2	85	2	chrIV	442926	T	C	TRUE	0	0	1	0	-1	0	-1	0.033	8.86242	TRUE	0.0582286	0.0375691	13	NA	NA	NA	FALSE	TRUE	FALSE	103	NA	FALSE	0.033	0.033	TRUE
chrIV_443786_C_T_+	YDL003W_chrIV_443786_C_T_72_2	-0.510515	-1.67794	-4.66	0.00023717	0.00720329	0.481768	UpStream	YDL003W	YDL003W	1	TRUE	+	1	73	1	chrIV	443786	C	T	TRUE	0	0	-1	0	1	0	0	0.961	6.71948	TRUE	0.140923	0.107737	35	1442	567	219	FALSE	FALSE	FALSE	897	0.92	TRUE	0.039	0.039	FALSE
chrIV_443942_G_GA_+	YDL003W_chrIV_443942_G_GA_72_2	0.158771	-0.588444	0.994261	0.334343	0.671114	-5.82424	UpStream	YDL003W	YDL003W	1	TRUE	+	1	73	1	chrIV	443942	G	GA	FALSE	1	1	0	0	0	0	0	0.565	6.71948	TRUE	0.140923	0.107737	35	1442	567	219	FALSE	FALSE	FALSE	741	NA	FALSE	0.435	0.565	TRUE
chrIV_444097_G_GA_+	YDL003W_chrIV_444097_G_GA_72_2	0.0414734	-0.663802	0.392359	0.699776	0.901498	-6.68208	UpStream	YDL003W	YDL003W	1	TRUE	+	1	73	1	chrIV	444097	G	GA	FALSE	1	1	0	0	0	0	0	0.96	6.71948	TRUE	0.140923	0.107737	35	1442	567	219	FALSE	FALSE	FALSE	586	0.96	TRUE	0.04	0.04	FALSE
chrIV_444482_GATATATATATATATATGTAC_G_+	YDL003W_chrIV_444482_GATATATATATATATATGTAC_G_72_2	0.814179	-1.98228	2.32476	0.0330243	0.202312	-3.57353	UpStream	YDL003W	YDL003W	1	TRUE	+	1	63	1	chrIV	444482	GATATATATATATATATGTAC	G	FALSE	-20	-9	-1	-1	-9	-4	-1	0.337	6.71948	TRUE	0.140923	0.107737	35	1442	567	219	FALSE	FALSE	FALSE	201	2.81	TRUE	0.337	0.663	FALSE
chrIV_452771_C_T_-	YDR001C_5UTR_0_21	-0.263122	-0.305483	-2.78295	0.00917221	0.0861847	-3.15249	TSS	YDR001C	YDR001C	1	TRUE	-	2	82	1	chrIV	452771	C	T	TRUE	0	0	-1	0	1	0	0	0.955	6.67468	FALSE	0.019511	0.0139465	21	512	107	27	FALSE	TRUE	TRUE	296	2.21	TRUE	0.045	0.045	FALSE
chrIV_452803_T_C_-	YDR001C_5UTR_0_12	0.0929529	-0.130082	1.10243	0.278925	0.57544	-6.06952	TSS	YDR001C	YDR001C	1	TRUE	-	2	50	2	chrIV	452803	T	C	TRUE	0	0	1	0	-1	0	0	0.59	6.67468	FALSE	0.019511	0.0139465	21	512	107	27	FALSE	TRUE	TRUE	328	2.21	TRUE	0.41	0.59	TRUE
chrIV_452907_C_CAA_-	YDR001C_chrIV_452907_C_CAA_72_2	1.23275	2.3022	4.23389	0.000584441	0.0137947	-0.539014	UpStream	YDR001C	YDR001C	1	TRUE	-	1	73	1	chrIV	452907	C	CAA	FALSE	2	2	0	0	0	0	0	0.132	6.67468	FALSE	0.019511	0.0139465	21	512	107	27	FALSE	TRUE	TRUE	432	NA	FALSE	0.132	0.132	TRUE
chrIV_454913_T_G_+	YDR004W_chrIV_454913_T_G_72_2	0.0736673	-0.176843	0.688796	0.500449	0.796599	-6.24116	UpStream	YDR004W	YDR004W	1	TRUE	+	1	73	1	chrIV	454913	T	G	TRUE	0	0	0	1	-1	0	0	0.091	5.26865	FALSE	0.0978408	0.0726797	9	1123	292	112	FALSE	TRUE	FALSE	288	2.17	TRUE	0.091	0.091	TRUE
chrIV_455054_C_T_+	YDR004W_chrIV_455054_C_T_72_2	-0.650333	-0.621389	-3.51783	0.00271492	0.042503	-1.52846	UpStream	YDR004W	YDR004W	1	TRUE	+	1	73	1	chrIV	455054	C	T	TRUE	0	0	-1	0	1	0	0	0.094	5.26865	FALSE	0.0978408	0.0726797	9	1123	292	112	FALSE	TRUE	FALSE	147	1.86	TRUE	0.094	0.094	TRUE
chrIV_458282_C_A_-	YDR005C_5UTR_0_2	-0.112347	0.514895	-2.51074	0.0175885	0.129881	-4.31294	TSS	YDR005C	YDR005C	1	TRUE	-	1	74	1	chrIV	458282	C	A	TRUE	0	1	-1	0	0	0	0	0.0009891	6.01451	FALSE	NA	NA	23	1485	470	171	FALSE	TRUE	FALSE	179	NA	FALSE	0.0009891	0.0009891	TRUE
chrIV_461469_G_C_+	YDR007W_chrIV_461469_G_C_72_2	0.172243	1.53259	1.80621	0.089016	0.335662	-5.06682	UpStream	YDR007W	YDR007W	1	TRUE	+	1	73	1	chrIV	461469	G	C	TRUE	0	0	1	-1	0	0	0	0.982	6.28281	FALSE	NA	NA	6	1105	252	71	FALSE	FALSE	FALSE	373	NA	FALSE	0.018	0.018	FALSE
chrIV_461615_T_C_+	YDR007W_chrIV_461615_T_C_72_2	-0.0419656	-2.1348	-0.368845	0.716897	0.908313	-6.59704	UpStream	YDR007W	YDR007W	1	TRUE	+	1	73	1	chrIV	461615	T	C	TRUE	0	0	1	0	-1	0	0	0.97	6.28281	FALSE	NA	NA	6	1105	252	71	FALSE	FALSE	FALSE	227	2.57	TRUE	0.03	0.03	FALSE
chrIV_471707_AT_A_+	YDR012W_5UTR_0_2	0.384575	1.72776	1.746	0.0909085	0.324215	-4.45949	TSS	YDR012W	YDR012W	1	TRUE	+	1	31	1	chrIV	471707	AT	A	FALSE	-1	0	0	0	-1	0	0	0.242	9.85305	FALSE	NA	NA	75	743	377	129	FALSE	TRUE	TRUE	146	2.71	TRUE	0.242	NA	NA
chrIV_484028_A_G_-	YDR018C_5UTR_0_2	0.82633	-2.53942	4.97675	2.40669e-05	0.000973906	2.43505	TSS	YDR018C	YDR018C	1	TRUE	-	1	6	1	chrIV	484028	A	G	TRUE	0	-1	0	1	0	0	0	0.972	2.40432	FALSE	NA	NA	2	471	96	30	FALSE	TRUE	TRUE	168	4.59	TRUE	0.028	0.028	FALSE
chrIV_485454_T_C_-	YDR019C_chrIV_485454_T_C_72_2	0.153076	-0.604051	1.69222	0.109254	0.379916	-5.44953	UpStream	YDR019C	YDR019C	1	TRUE	-	1	73	1	chrIV	485454	T	C	TRUE	0	0	1	0	-1	0	0	0.229	7.74239	FALSE	NA	NA	4	1131	504	171	FALSE	TRUE	FALSE	89	5.67	TRUE	0.229	0.229	TRUE
chrIV_507975_A_G_+	YDR033W_chrIV_507975_A_G_72_2	-0.0528963	-0.778654	-0.409383	0.687483	0.894566	-6.41401	UpStream	YDR033W	YDR033W	1	TRUE	+	1	73	1	chrIV	507975	A	G	TRUE	0	-1	0	1	0	0	0	0.445	9.4976	FALSE	0.128711	0.0538066	21	823	162	68	FALSE	FALSE	TRUE	172	NA	FALSE	0.445	0.445	TRUE
chrIV_521623_C_T_+	YDR035W_chrIV_521623_C_T_72_2	-0.185841	-0.369249	-1.47365	0.159252	0.462921	-5.52797	UpStream	YDR035W	YDR035W	1	TRUE	+	1	73	1	chrIV	521623	C	T	TRUE	0	0	-1	0	1	0	0	0.719	7.50923	FALSE	NA	NA	8	820	107	26	FALSE	FALSE	FALSE	193	NA	FALSE	0.281	0.281	FALSE
chrIV_521753_C_T_+	YDR035W_5UTR_0_21	0.129992	0.735734	1.45059	0.157134	0.433086	-5.65771	TSS	YDR035W	YDR035W	1	TRUE	+	2	111	1	chrIV	521753	C	T	TRUE	0	0	-1	0	1	0	0	0.372	7.50923	FALSE	NA	NA	8	820	107	26	FALSE	FALSE	FALSE	63	2.59	TRUE	0.372	0.372	TRUE
chrIV_521776_C_G_+	YDR035W_5UTR_0_12	0.0104295	0.678629	0.115317	0.908952	0.964526	-6.80883	TSS	YDR035W	YDR035W	1	TRUE	+	2	134	2	chrIV	521776	C	G	TRUE	0	0	-1	1	0	0	0	0.4	7.50923	FALSE	NA	NA	8	820	107	26	FALSE	FALSE	FALSE	40	2.59	TRUE	0.4	0.4	TRUE
chrIV_525250_G_T_-	YDR036C_chrIV_525250_G_T_72_2	0.0186656	1.74089	0.28651	0.778026	0.92819	-6.73843	UpStream	YDR036C	YDR036C	1	TRUE	-	1	73	1	chrIV	525250	G	T	TRUE	0	0	0	-1	1	0	0	0.519	5.46418	FALSE	0.107823	0.0698295	24	450	59	22	FALSE	TRUE	FALSE	537	5.08	TRUE	0.481	0.519	TRUE
chrIV_525268_C_CT_+	YDR037W_chrIV_525268_C_CT_72_2	-0.311404	1.29606	-1.48121	0.157247	0.459305	-5.01948	UpStream	YDR037W	YDR037W	1	TRUE	+	1	73	1	chrIV	525268	C	CT	FALSE	1	0	0	0	1	0	0	0.517	8.86206	TRUE	NA	NA	23	539	123	64	FALSE	TRUE	FALSE	172	5.08	TRUE	0.483	NA	NA
chrIV_539207_T_C_+	YDR041W_chrIV_539207_T_C_72_2	0.197584	1.6902	2.64511	0.0172359	0.138538	-3.71534	UpStream	YDR041W	YDR041W	1	TRUE	+	1	73	1	chrIV	539207	T	C	TRUE	0	0	1	0	-1	0	0	0.586	6.47157	TRUE	NA	NA	27	NA	NA	NA	FALSE	FALSE	FALSE	596	NA	FALSE	0.414	0.414	FALSE
chrIV_539688_C_T_+	YDR041W_5UTR_0_2	-0.0491217	-0.105582	-0.645603	0.523379	0.775057	-6.7088	TSS	YDR041W	YDR041W	1	TRUE	+	1	38	1	chrIV	539688	C	T	TRUE	0	0	-1	0	1	0	0	0.001978	6.47157	TRUE	NA	NA	27	NA	NA	NA	FALSE	FALSE	FALSE	115	8.52	TRUE	0.001978	0.001978	TRUE
chrIV_541267_G_A_-	YDR042C_5UTR_0_21	0.0762946	0.673761	0.823469	0.416653	0.700966	-6.40499	TSS	YDR042C	YDR042C	1	TRUE	-	2	139	1	chrIV	541267	G	A	TRUE	0	1	0	-1	0	0	0	0.43	1.16354	FALSE	NA	NA	3	956	215	55	FALSE	FALSE	FALSE	64	4.7	TRUE	0.43	0.43	TRUE
chrIV_541275_C_T_-	YDR042C_5UTR_0_12	0.18688	0.718257	2.31587	0.0274868	0.168529	-4.25321	TSS	YDR042C	YDR042C	1	TRUE	-	2	131	2	chrIV	541275	C	T	TRUE	0	0	-1	0	1	0	0	0.43	1.16354	FALSE	NA	NA	3	956	215	55	FALSE	FALSE	FALSE	72	4.7	TRUE	0.43	0.43	TRUE
chrIV_546402_G_A_+	YDR044W_chrIV_546402_G_A_72_2	0.161255	0.0118555	1.92883	0.0709981	0.300017	-5.00469	UpStream	YDR044W	YDR044W	1	TRUE	+	1	73	1	chrIV	546402	G	A	TRUE	0	1	0	-1	0	0	0	0.003956	4.54323	TRUE	NA	NA	26	982	401	183	FALSE	TRUE	FALSE	240	3.19	TRUE	0.003956	0.003956	TRUE
chrIV_546551_G_GT_+	YDR044W_5UTR_0_21	-0.0473174	-0.960689	-0.335479	0.739568	0.895057	-6.0911	TSS	YDR044W	YDR044W	1	TRUE	+	2	97	1	chrIV	546551	G	GT	FALSE	1	0	0	0	1	0	0	0.223	4.54323	TRUE	NA	NA	26	982	401	183	FALSE	TRUE	FALSE	91	NA	FALSE	0.223	NA	NA
chrIV_548546_GT_GTT_-	YDR045C_5UTR_0_2	-0.265941	0.418218	-1.28976	0.206858	0.496687	-5.07451	TSS	YDR045C	YDR045C	1	TRUE	-	1	64	1	chrIV	548546	GT	GTT	FALSE	1	0	0	0	1	0	0	NA	6.4143	TRUE	0.00804912	0.00494876	19	1211	505	218	FALSE	TRUE	FALSE	236	3.41	TRUE	NA	NA	NA
chrIV_551387_C_A_-	YDR046C_chrIV_551387_C_A_72_2	-0.244401	-0.251122	-2.66157	0.01666	0.135617	-3.62498	UpStream	YDR046C	YDR046C	1	TRUE	-	1	73	1	chrIV	551387	C	A	TRUE	0	1	-1	0	0	0	0	0.945	NA	FALSE	NA	NA	11	1077	366	138	FALSE	FALSE	TRUE	811	NA	FALSE	0.055	0.055	FALSE
chrIV_556934_A_C_-	YDR050C_chrIV_556934_A_C_72_2	-0.129732	-0.299933	-1.02376	0.320609	0.659217	-5.94691	UpStream	YDR050C	YDR050C	1	TRUE	-	1	73	1	chrIV	556934	A	C	TRUE	0	-1	1	0	0	0	0	0.964	12.0439	TRUE	NA	NA	37	481	151	63	FALSE	TRUE	FALSE	462	NA	FALSE	0.036	0.036	FALSE
chrIV_562609_GA_G_-	YDR054C_5UTR_0_2	-0.0473187	0.239891	-0.756177	0.455362	0.726616	-6.63819	TSS	YDR054C	YDR054C	1	TRUE	-	1	52	1	chrIV	562609	GA	G	FALSE	-1	-1	0	0	0	0	0	0.8	6.84637	TRUE	0.0109286	0.00756028	45	913	457	268	FALSE	FALSE	FALSE	282	NA	FALSE	0.2	NA	NA
chrIV_562709_A_C_+	YDR055W_chrIV_562709_A_C_72_2	-0.0514655	-0.768888	-0.66757	0.513566	0.800341	-6.61639	UpStream	YDR055W	YDR055W	1	TRUE	+	1	73	1	chrIV	562709	A	C	TRUE	0	-1	1	0	0	0	0	0.015	8.15534	FALSE	0.0731161	0.0505625	7	717	162	54	FALSE	FALSE	TRUE	818	2.1	TRUE	0.015	0.015	TRUE
chrIV_568816_G_A_-	YDR058C_5UTR_0_211	0.46174	-0.0875091	2.96828	0.00579259	0.0627875	-2.48676	TSS	YDR058C	YDR058C	1	TRUE	-	3	65	1	chrIV	568816	G	A	TRUE	0	1	0	-1	0	0	0	0.97	5.1707	FALSE	0.04999	0.0393668	3	869	306	122	FALSE	FALSE	FALSE	113	2.62	TRUE	0.03	0.03	FALSE
chrIV_568863_G_A_-	YDR058C_5UTR_0_121	-0.110829	-0.364541	-0.651951	0.519331	0.771115	-6.08286	TSS	YDR058C	YDR058C	1	TRUE	-	3	18	2	chrIV	568863	G	A	TRUE	0	1	0	-1	0	0	0	0.963	5.1707	FALSE	0.04999	0.0393668	3	869	306	122	FALSE	FALSE	FALSE	160	2.62	TRUE	0.037	0.037	FALSE
chrIV_568871_G_A_-	YDR058C_5UTR_0_112	-0.707231	-0.670357	-4.20722	0.000210936	0.00504086	0.597694	TSS	YDR058C	YDR058C	1	TRUE	-	3	10	3	chrIV	568871	G	A	TRUE	0	1	0	-1	0	0	0	0.913	5.1707	FALSE	0.04999	0.0393668	3	869	306	122	FALSE	FALSE	FALSE	168	2.62	TRUE	0.087	0.087	FALSE
chrIV_570480_T_A_+	YDR060W_5UTR_0_2	-0.00138055	1.32906	-0.024703	0.980453	0.994656	-7.18316	TSS	YDR060W	YDR060W	1	TRUE	+	1	17	1	chrIV	570480	T	A	TRUE	0	1	0	0	-1	0	0	0.599	6.91059	TRUE	NA	NA	150	1210	565	254	FALSE	TRUE	FALSE	169	NA	FALSE	0.401	0.599	TRUE
chrIV_573928_A_G_+	YDR061W_chrIV_573928_A_G_72_2	-0.0563537	0.404168	-0.741636	0.468653	0.778012	-6.50935	UpStream	YDR061W	YDR061W	1	TRUE	+	1	73	1	chrIV	573928	A	G	TRUE	0	-1	0	1	0	0	0	0.967	5.69024	FALSE	0.215658	0.181289	11	819	256	109	FALSE	FALSE	FALSE	236	NA	FALSE	0.033	0.033	FALSE
chrIV_574093_G_A_+	YDR061W_5UTR_0_2	0.0377331	-1.13594	0.438904	0.663834	0.863474	-6.84729	TSS	YDR061W	YDR061W	1	TRUE	+	1	129	1	chrIV	574093	G	A	TRUE	0	1	0	-1	0	0	0	0.967	5.69024	FALSE	0.215658	0.181289	11	819	256	109	FALSE	FALSE	FALSE	71	3.59	TRUE	0.033	0.033	FALSE
chrIV_578452_GTT_GT_+	YDR063W_chrIV_578452_GTT_GT_72_2	-0.0644823	0.381935	-0.603792	0.554129	0.824758	-6.32187	UpStream	YDR063W	YDR063W	1	TRUE	+	1	72	1	chrIV	578452	GTT	GT	FALSE	-1	0	0	0	-1	0	0	0.662	7.20699	FALSE	0.0676009	0.0500374	13	762	233	83	FALSE	FALSE	FALSE	211	NA	FALSE	0.338	NA	NA
chrIV_578506_A_G_+	YDR063W_chrIV_578506_A_G_72_2	0.114424	-0.637413	0.782869	0.44471	0.759262	-5.97651	UpStream	YDR063W	YDR063W	1	TRUE	+	1	73	1	chrIV	578506	A	G	TRUE	0	-1	0	1	0	0	0	0.196	7.20699	FALSE	0.0676009	0.0500374	13	762	233	83	FALSE	FALSE	FALSE	157	NA	FALSE	0.196	0.196	TRUE
chrIV_578512_T_C_+	YDR063W_5UTR_0_1121	0.477559	-0.0290203	3.67098	0.000921661	0.0168508	-0.882615	TSS	YDR063W	YDR063W	1	TRUE	+	4	62	3	chrIV	578512	T	C	TRUE	0	0	1	0	-1	0	0	0.152	7.20699	FALSE	0.0676009	0.0500374	13	762	233	83	FALSE	FALSE	FALSE	151	NA	FALSE	0.152	0.152	TRUE
chrIV_578566_T_A_+	YDR063W_5UTR_0_1112	-0.129293	-0.326094	-1.07308	0.291676	0.58646	-5.88961	TSS	YDR063W	YDR063W	1	TRUE	+	4	116	4	chrIV	578566	T	A	TRUE	0	1	0	0	-1	0	0	0.924	7.20699	FALSE	0.0676009	0.0500374	13	762	233	83	FALSE	FALSE	FALSE	97	2	TRUE	0.076	0.076	FALSE
chrIV_587932_A_G_-	YDR069C_chrIV_587932_A_G_72_2	-0.0305139	-0.907581	-0.377461	0.710605	0.907082	-6.63029	UpStream	YDR069C	YDR069C	1	TRUE	-	1	73	1	chrIV	587932	A	G	TRUE	0	-1	0	1	0	0	0	0.531	4.00528	FALSE	NA	NA	21	1105	427	168	FALSE	TRUE	TRUE	213	3.01	TRUE	0.469	0.531	TRUE
chrIV_588711_G_T_-	YDR070C_chrIV_588711_G_T_72_2	0.448584	-0.324232	3.23338	0.00499477	0.0662363	-2.29958	UpStream	YDR070C	YDR070C	1	TRUE	-	1	73	1	chrIV	588711	G	T	TRUE	0	0	0	-1	1	0	0	0.583	6.58225	FALSE	NA	NA	8	722	88	29	FALSE	FALSE	FALSE	332	1.64	TRUE	0.417	0.583	TRUE
chrIV_592224_A_G_+	YDR073W_5UTR_0_21	0.206048	-0.0531719	1.70605	0.0981947	0.341767	-5.07039	TSS	YDR073W	YDR073W	1	TRUE	+	2	14	1	chrIV	592224	A	G	TRUE	0	-1	0	1	0	0	0	0.958	5.74094	FALSE	0.136113	0.105381	21	1026	273	85	FALSE	FALSE	FALSE	215	NA	FALSE	0.042	0.042	FALSE
chrIV_593642_T_C_+	YDR074W_5UTR_0_211	-0.289801	-0.421729	-5.63028	3.76046e-06	0.000223785	3.96062	TSS	YDR074W	YDR074W	1	TRUE	+	3	4	1	chrIV	593642	T	C	TRUE	0	0	1	0	-1	0	0	0.942	6.01357	FALSE	NA	NA	23	1438	722	344	FALSE	FALSE	FALSE	251	NA	FALSE	0.058	0.058	FALSE
chrIV_593676_T_C_+	YDR074W_5UTR_0_121	-0.139203	-0.345795	-2.3614	0.0248028	0.160504	-4.54479	TSS	YDR074W	YDR074W	1	TRUE	+	3	38	2	chrIV	593676	T	C	TRUE	0	0	1	0	-1	0	0	0.096	6.01357	FALSE	NA	NA	23	1438	722	344	FALSE	FALSE	FALSE	217	NA	FALSE	0.096	0.096	TRUE
chrIV_593751_C_T_+	YDR074W_5UTR_0_112	0.0327016	-0.257951	0.604124	0.550243	0.79282	-6.98954	TSS	YDR074W	YDR074W	1	TRUE	+	3	113	3	chrIV	593751	C	T	TRUE	0	0	-1	0	1	0	0	0.62	6.01357	FALSE	NA	NA	23	1438	722	344	FALSE	FALSE	FALSE	142	NA	FALSE	0.38	0.62	TRUE
chrIV_596843_A_T_+	YDR075W_5UTR_0_2	-0.165299	-0.242632	-0.878461	0.386583	0.675852	-5.52658	TSS	YDR075W	YDR075W	1	TRUE	+	1	6	1	chrIV	596843	A	T	TRUE	0	-1	0	0	1	0	0	0.45	6.0099	FALSE	NA	NA	25	920	418	173	FALSE	FALSE	FALSE	313	1.42	TRUE	0.45	0.45	TRUE
chrIV_598232_C_T_+	YDR076W_chrIV_598232_C_T_72_2	0.0819054	-1.82075	0.67292	0.510241	0.798937	-6.23837	UpStream	YDR076W	YDR076W	1	TRUE	+	1	73	1	chrIV	598232	C	T	TRUE	0	0	-1	0	1	0	0	0.942	4.35931	FALSE	0.1144	0.0857302	10	1037	299	114	FALSE	FALSE	FALSE	236	0.39	TRUE	0.058	0.058	FALSE
chrIV_600707_C_T_+	YDR077W_chrIV_600707_C_T_72_2	0.00816707	-1.07539	0.0898779	0.929458	0.978953	-6.67602	UpStream	YDR077W	YDR077W	1	TRUE	+	1	73	1	chrIV	600707	C	T	TRUE	0	0	-1	0	1	0	0	0.266	11.8362	FALSE	0.140206	0.0801354	11	789	216	68	FALSE	FALSE	TRUE	86	NA	FALSE	0.266	0.266	TRUE
chrIV_600712_C_T_+	YDR077W_chrIV_600712_C_T_72_2	0.0502075	-1.00248	0.310476	0.760056	0.922329	-6.45004	UpStream	YDR077W	YDR077W	1	TRUE	+	1	73	1	chrIV	600712	C	T	TRUE	0	0	-1	0	1	0	0	0.212	11.8362	FALSE	0.140206	0.0801354	11	789	216	68	FALSE	FALSE	TRUE	81	NA	FALSE	0.212	0.212	TRUE
chrIV_602949_T_A_-	YDR078C_5UTR_0_21	0.417517	-0.500742	2.27818	0.0299044	0.174427	-3.79134	TSS	YDR078C	YDR078C	1	TRUE	-	2	82	1	chrIV	602949	T	A	TRUE	0	1	0	0	-1	0	0	0.549	3.30905	FALSE	0.12566	0.094738	6	107	44	16	FALSE	FALSE	FALSE	80	NA	FALSE	0.451	0.549	TRUE
chrIV_603005_G_A_-	YDR078C_5UTR_0_12	-0.0721287	-0.749268	-0.353613	0.726069	0.888556	-5.97912	TSS	YDR078C	YDR078C	1	TRUE	-	2	26	2	chrIV	603005	G	A	TRUE	0	1	0	-1	0	0	0	0.907	3.30905	FALSE	0.12566	0.094738	6	107	44	16	FALSE	FALSE	FALSE	136	NA	FALSE	0.093	0.093	FALSE
chrIV_603899_T_C_+	YDR080W_5UTR_0_2	-0.0955981	-0.215921	-0.664529	0.51136	0.765086	-6.24793	TSS	YDR080W	YDR080W	1	TRUE	+	1	68	1	chrIV	603899	T	C	TRUE	0	0	1	0	-1	0	0	0.321	4.52739	FALSE	NA	NA	30	1131	581	394	FALSE	TRUE	FALSE	109	NA	FALSE	0.321	0.321	TRUE
chrIV_617276_GTTTAA_G_-	YDR086C_5UTR_0_21	-0.288661	0.182783	-5.165	1.4096e-05	0.000644686	2.7575	TSS	YDR086C	YDR086C	1	TRUE	-	2	132	1	chrIV	617276	GTTTAA	G	FALSE	-5	-2	0	0	-3	0	0	0.891	9.19294	TRUE	0.0389783	0.0195381	30	1217	545	258	FALSE	TRUE	FALSE	106	1.62	TRUE	0.109	0.109	FALSE
chrIV_617323_T_TA_-	YDR086C_5UTR_0_12	0.0881111	0.370956	1.34614	0.188207	0.474005	-5.93189	TSS	YDR086C	YDR086C	1	TRUE	-	2	85	2	chrIV	617323	T	TA	FALSE	1	1	0	0	0	0	0	0.453	9.19294	TRUE	0.0389783	0.0195381	30	1217	545	258	FALSE	TRUE	FALSE	153	NA	FALSE	0.453	NA	NA
chrIV_618461_C_T_-	YDR087C_5UTR_0_2	0.0595529	0.397701	0.883974	0.383647	0.674008	-6.90497	TSS	YDR087C	YDR087C	1	TRUE	-	1	27	1	chrIV	618461	C	T	TRUE	0	0	-1	0	1	0	0	0.547	7.06523	TRUE	0.106517	0.0765176	85	1296	619	366	FALSE	TRUE	FALSE	155	1.97	TRUE	0.453	0.547	TRUE
chrIV_620786_A_G_-	tR(ACG)D_chrIV_620786_A_G_72_2	0.175443	-0.952468	2.01895	0.0599137	0.274338	-4.79484	UpStream	tR(ACG)D	tR(ACG)D	1	TRUE	-	1	73	1	chrIV	620786	A	G	TRUE	0	-1	0	1	0	0	0	0.037	NA	FALSE	NA	NA	1	NA	NA	NA	FALSE	FALSE	FALSE	745	2.08	TRUE	0.037	NA	NA
chrIV_621613_T_C_+	YDR089W_chrIV_621613_T_C_72_2	0.00318479	-0.435051	0.0358795	0.971806	0.990422	-6.80157	UpStream	YDR089W	YDR089W	1	TRUE	+	1	73	1	chrIV	621613	T	C	TRUE	0	0	1	0	-1	0	0	0.002473	4.87759	FALSE	NA	NA	2	907	188	65	FALSE	FALSE	FALSE	499	9.32	TRUE	0.002473	0.002473	TRUE
chrIV_621945_C_T_+	YDR089W_chrIV_621945_C_T_72_2	-1.02515	-0.00806325	-7.53149	9.43648e-07	0.000162198	5.94719	UpStream	YDR089W	YDR089W	1	TRUE	+	1	73	1	chrIV	621945	C	T	TRUE	0	0	-1	0	1	0	0	0.088	4.87759	FALSE	NA	NA	2	907	188	65	FALSE	FALSE	FALSE	167	NA	FALSE	0.088	0.088	TRUE
chrIV_636810_TC_T_+	YDR096W_5UTR_0_2	-0.0575543	0.176248	-0.807441	0.425684	0.707143	-6.59239	TSS	YDR096W	YDR096W	1	TRUE	+	1	99	1	chrIV	636810	TC	T	FALSE	-1	0	-1	0	0	0	0	0.032	3.83041	FALSE	NA	NA	27	796	175	68	TRUE	TRUE	TRUE	329	2.71	TRUE	0.032	0.032	TRUE
chrIV_645501_T_TAAGGTTGTTTCA_-	tQ(UUG)D2_chrIV_645501_T_TAAGGTTGTTTCA_72_2	-0.0198774	-0.561347	-0.166483	0.869784	0.956036	-6.81083	UpStream	tQ(UUG)D2	tQ(UUG)D2	1	TRUE	-	1	69	1	chrIV	645501	T	TAAGGTTGTTTCA	FALSE	12	3	1	3	5	0	1	NA	NA	FALSE	NA	NA	NA	NA	NA	NA	FALSE	FALSE	FALSE	277	2.81	TRUE	NA	NA	NA
chrIV_654943_T_C_+	YDR100W_5UTR_0_2	-0.0298335	-0.15167	-0.78732	0.437189	0.714522	-6.9441	TSS	YDR100W	YDR100W	1	TRUE	+	1	115	1	chrIV	654943	T	C	TRUE	0	0	1	0	-1	0	0	0.327	6.6846	FALSE	0.0598284	0.0408337	65	797	89	33	FALSE	FALSE	FALSE	70	NA	FALSE	0.327	0.327	TRUE
chrIV_678773_T_C_+	YDR112W_chrIV_678773_T_C_72_2	0.205799	0.41071	2.98266	0.00851093	0.0905396	-3.12298	UpStream	YDR112W	YDR112W	1	TRUE	+	1	73	1	chrIV	678773	T	C	TRUE	0	0	1	0	-1	0	0	0.993	NA	FALSE	NA	NA	NA	369	50	13	FALSE	FALSE	FALSE	771	1.1	TRUE	0.007	0.007	FALSE
chrIV_680244_G_A_-	YDR111C_chrIV_680244_G_A_72_2	-0.137954	-0.707573	-0.825034	0.421029	0.743298	-6.28967	UpStream	YDR111C	YDR111C	1	TRUE	-	1	73	1	chrIV	680244	G	A	TRUE	0	1	0	-1	0	0	0	0.923	4.63782	FALSE	0.0786252	0.0574305	6	879	114	38	FALSE	TRUE	TRUE	480	1.4	TRUE	0.077	0.077	FALSE
chrIV_693401_TAA_T_+	YDR121W_5UTR_0_2	-0.0639271	-0.719253	-0.361677	0.720095	0.886608	-6.00001	TSS	YDR121W	YDR121W	1	TRUE	+	1	94	1	chrIV	693401	TAA	T	FALSE	-2	-2	0	0	0	0	0	0.682	5.67482	FALSE	0.0917128	0.0681684	23	898	216	75	FALSE	FALSE	FALSE	184	3.13	TRUE	0.318	0.318	FALSE
chrIV_694335_G_A_+	YDR122W_5UTR_0_2	0.401149	-0.180969	6.46479	3.60079e-07	2.80216e-05	6.38741	TSS	YDR122W	YDR122W	1	TRUE	+	1	87	1	chrIV	694335	G	A	TRUE	0	1	0	-1	0	0	0	0.002473	5.32257	FALSE	NA	NA	45	846	93	21	FALSE	TRUE	TRUE	365	NA	FALSE	0.002473	0.002473	TRUE
chrIV_720439_T_A_-	YDR132C_5UTR_0_211	-0.0904336	-0.109713	-1.24788	0.221599	0.51273	-6.19895	TSS	YDR132C	YDR132C	1	TRUE	-	3	117	1	chrIV	720439	T	A	TRUE	0	1	0	0	-1	0	0	0.813	3.42765	FALSE	NA	NA	16	794	122	38	FALSE	FALSE	TRUE	136	3.75	TRUE	0.187	0.187	FALSE
chrIV_720440_C_T_-	YDR132C_5UTR_0_121	-0.0109941	-0.0731866	-0.151499	0.880583	0.95177	-6.98787	TSS	YDR132C	YDR132C	1	TRUE	-	3	116	2	chrIV	720440	C	T	TRUE	0	0	-1	0	1	0	0	0.855	3.42765	FALSE	NA	NA	16	794	122	38	FALSE	FALSE	TRUE	137	3.75	TRUE	0.145	0.145	FALSE
chrIV_720543_A_AAAGACAAAAGCAAGCT_-	YDR132C_5UTR_0_112	-0.251848	-0.185884	-3.47926	0.00154138	0.0254112	-1.69075	TSS	YDR132C	YDR132C	1	TRUE	-	3	13	3	chrIV	720543	A	AAAGACAAAAGCAAGCT	FALSE	16	9	3	3	1	0	0	0.547	3.42765	FALSE	NA	NA	16	794	122	38	FALSE	FALSE	TRUE	240	NA	FALSE	0.453	0.547	TRUE
chrIV_721724_GA_G_-	YDR133C_chrIV_721724_GA_G_72_2	0.0139114	3.1022	0.139338	0.890856	0.963747	-6.45186	UpStream	YDR133C	YDR133C	1	TRUE	-	1	74	1	chrIV	721724	GA	G	FALSE	-1	-1	0	0	0	0	0	0.704	8.82438	FALSE	NA	NA	NA	557	141	39	FALSE	FALSE	FALSE	427	1.01	TRUE	0.296	NA	NA
chrIV_722058_C_T_-	YDR133C_chrIV_722058_C_T_72_2	-0.0277056	0.0924256	-0.320304	0.752727	0.919963	-6.63702	UpStream	YDR133C	YDR133C	1	TRUE	-	1	73	1	chrIV	722058	C	T	TRUE	0	0	-1	0	1	0	0	0.584	8.82438	FALSE	NA	NA	NA	557	141	39	FALSE	FALSE	FALSE	761	0.66	TRUE	0.416	0.584	TRUE
chrIV_722085_A_G_-	YDR133C_chrIV_722085_A_G_72_2	-0.367333	0.0108293	-3.93761	0.0011016	0.0224796	-0.896454	UpStream	YDR133C	YDR133C	1	TRUE	-	1	73	1	chrIV	722085	A	G	TRUE	0	-1	0	1	0	0	0	0.909	8.82438	FALSE	NA	NA	NA	557	141	39	FALSE	FALSE	FALSE	788	0.66	TRUE	0.091	0.091	FALSE
chrIV_727626_A_G_-	YDR135C_5UTR_0_21	-0.323428	0.844493	-1.31005	0.19999	0.48711	-4.91549	TSS	YDR135C	YDR135C	1	TRUE	-	2	113	1	chrIV	727626	A	G	TRUE	0	-1	0	1	0	0	0	0.379	5.93472	FALSE	NA	NA	52	521	92	33	FALSE	TRUE	FALSE	75	2.2	TRUE	0.379	NA	NA
chrIV_727685_A_G_-	YDR135C_5UTR_0_12	0.420171	1.29406	1.76168	0.0881764	0.31856	-4.33481	TSS	YDR135C	YDR135C	1	TRUE	-	2	54	2	chrIV	727685	A	G	TRUE	0	-1	0	1	0	0	0	0.377	5.93472	FALSE	NA	NA	52	521	92	33	FALSE	TRUE	FALSE	134	NA	FALSE	0.377	0.377	TRUE
chrIV_727773_T_TA_+	YDR137W_chrIV_727773_T_TA_72_2	0.0598583	-0.273406	0.263501	0.795401	0.93338	-5.85243	UpStream	YDR137W	YDR137W	1	TRUE	+	1	73	1	chrIV	727773	T	TA	FALSE	1	1	0	0	0	0	0	0.982	5.18223	FALSE	0.142546	0.108281	11	1151	520	240	FALSE	FALSE	FALSE	486	6.23	TRUE	0.018	0.018	FALSE
chrIV_730340_G_A_+	YDR138W_chrIV_730340_G_A_72_2	-0.26817	-1.61353	-1.79807	0.0903429	0.337818	-4.7396	UpStream	YDR138W	YDR138W	1	TRUE	+	1	73	1	chrIV	730340	G	A	TRUE	0	1	0	-1	0	0	0	0.536	4.83978	FALSE	NA	NA	49	NA	NA	NA	FALSE	FALSE	FALSE	238	1.89	TRUE	0.464	0.536	TRUE
chrIV_740275_T_A_-	YDR141C_chrIV_740275_T_A_72_2	0.671644	-0.954	1.50666	0.150656	0.449155	-4.69383	UpStream	YDR141C	YDR141C	1	TRUE	-	1	73	1	chrIV	740275	T	A	TRUE	0	1	0	0	-1	0	0	0.629	4.3028	TRUE	NA	NA	23	1007	338	156	FALSE	TRUE	FALSE	278	2.91	TRUE	0.371	0.371	FALSE
chrIV_741699_T_C_-	YDR142C_chrIV_741699_T_C_72_2	0.0366983	-0.238772	0.339455	0.738516	0.91444	-6.45832	UpStream	YDR142C	YDR142C	1	TRUE	-	1	73	1	chrIV	741699	T	C	TRUE	0	0	1	0	-1	0	0	0.129	4.95334	FALSE	NA	NA	27	816	177	50	FALSE	TRUE	FALSE	99	2.21	TRUE	0.129	0.129	TRUE
chrIV_741737_A_T_-	YDR142C_chrIV_741737_A_T_72_2	-0.0452589	0.371186	-0.593342	0.560936	0.828238	-6.55204	UpStream	YDR142C	YDR142C	1	TRUE	-	1	73	1	chrIV	741737	A	T	TRUE	0	-1	0	0	1	0	0	0.012	4.95334	FALSE	NA	NA	27	816	177	50	FALSE	TRUE	FALSE	137	2.21	TRUE	0.012	0.012	TRUE
chrIV_741803_G_C_-	YDR142C_5UTR_0_21	-0.124796	-0.216931	-2.04855	0.0492234	0.233427	-5.09108	TSS	YDR142C	YDR142C	1	TRUE	-	2	111	1	chrIV	741803	G	C	TRUE	0	0	1	-1	0	0	0	0.633	4.95334	FALSE	NA	NA	27	816	177	50	FALSE	TRUE	FALSE	203	2.21	TRUE	0.367	0.367	FALSE
chrIV_741894_A_G_-	YDR142C_5UTR_0_12	-0.195389	-0.251208	-2.81896	0.00839689	0.0810958	-3.49195	TSS	YDR142C	YDR142C	1	TRUE	-	2	20	2	chrIV	741894	A	G	TRUE	0	-1	0	1	0	0	0	0.543	4.95334	FALSE	NA	NA	27	816	177	50	FALSE	TRUE	FALSE	294	NA	FALSE	0.457	0.543	TRUE
chrIV_744041_C_T_-	YDR143C_5UTR_0_211	-0.10016	0.00651864	-1.60185	0.119529	0.374949	-5.89996	TSS	YDR143C	YDR143C	1	TRUE	-	3	124	1	chrIV	744041	C	T	TRUE	0	0	-1	0	1	0	-1	0.56	5.01464	FALSE	0.211579	0.156976	66	972	273	89	FALSE	FALSE	FALSE	167	3.86	TRUE	0.44	0.56	TRUE
chrIV_744157_G_A_-	YDR143C_5UTR_0_121	-0.0347415	0.0387761	-0.579068	0.566809	0.806352	-7.05421	TSS	YDR143C	YDR143C	1	TRUE	-	3	8	2	chrIV	744157	G	A	TRUE	0	1	0	-1	0	0	0	0.589	5.01464	FALSE	0.211579	0.156976	66	972	273	89	FALSE	FALSE	FALSE	283	3.86	TRUE	0.411	0.589	TRUE
chrIV_744159_T_C_-	YDR143C_5UTR_0_112	-0.0642688	0.0205877	-1.14303	0.261945	0.560138	-6.53536	TSS	YDR143C	YDR143C	1	TRUE	-	3	6	3	chrIV	744159	T	C	TRUE	0	0	1	0	-1	0	0	0.595	5.01464	FALSE	0.211579	0.156976	66	972	273	89	FALSE	FALSE	FALSE	285	3.86	TRUE	0.405	0.405	FALSE
chrIV_744218_G_A_-	YDR143C_chrIV_744218_G_A_72_2	0.245736	-1.53828	2.0967	0.0516354	0.258097	-4.63098	UpStream	YDR143C	YDR143C	1	TRUE	-	1	73	1	chrIV	744218	G	A	TRUE	0	1	0	-1	0	0	0	0.539	5.01464	FALSE	0.211579	0.156976	66	972	273	89	FALSE	FALSE	FALSE	344	7.32	TRUE	0.461	0.539	TRUE
chrIV_746186_C_T_-	YDR144C_chrIV_746186_C_T_72_2	-0.0694901	-0.825657	-0.547748	0.591142	0.842176	-6.59913	UpStream	YDR144C	YDR144C	1	TRUE	-	1	73	1	chrIV	746186	C	T	TRUE	0	0	-1	0	1	0	0	0.924	4.72709	FALSE	NA	NA	1	879	222	78	FALSE	FALSE	TRUE	85	4.83	TRUE	0.076	0.076	FALSE
chrIV_746353_CAA_CA_-	YDR144C_5UTR_0_2	-0.497086	0.0224167	-1.68156	0.102899	0.349807	-4.50129	TSS	YDR144C	YDR144C	1	TRUE	-	1	33	1	chrIV	746353	CAA	CA	FALSE	-1	-1	0	0	0	0	0	0.465	4.72709	FALSE	NA	NA	1	879	222	78	FALSE	FALSE	TRUE	252	NA	FALSE	0.465	NA	NA
chrIV_746550_A_C_+	YDR145W_5UTR_0_2	-0.286649	-0.89396	-1.84586	0.0746695	0.291663	-4.69605	TSS	YDR145W	YDR145W	1	TRUE	+	1	44	1	chrIV	746550	A	C	TRUE	0	-1	1	0	0	0	0	0.572	6.34011	TRUE	NA	NA	116	3272	1012	397	TRUE	TRUE	FALSE	188	3.2	TRUE	0.428	0.572	TRUE
chrIV_750901_CT_C_-	YDR146C_chrIV_750901_CT_C_72_2	0.201708	-1.36093	1.68162	0.111322	0.384466	-5.31808	UpStream	YDR146C	YDR146C	1	TRUE	-	1	74	1	chrIV	750901	CT	C	FALSE	-1	0	0	0	-1	0	0	0.687	6.04354	FALSE	NA	NA	43	1339	560	238	TRUE	TRUE	TRUE	159	1.66	TRUE	0.313	0.313	FALSE
chrIV_751490_G_A_+	YDR147W_5UTR_0_2	0.0383912	-0.299953	0.257731	0.798351	0.919194	-6.24546	TSS	YDR147W	YDR147W	1	TRUE	+	1	66	1	chrIV	751490	G	A	TRUE	0	1	0	-1	0	0	0	0.572	5.74035	FALSE	NA	NA	6	938	261	91	FALSE	TRUE	TRUE	141	NA	FALSE	0.428	0.572	TRUE
chrIV_755101_T_C_-	YDR148C_5UTR_0_2	-0.119079	0.468019	-1.11352	0.274213	0.572376	-6.02869	TSS	YDR148C	YDR148C	1	TRUE	-	1	133	1	chrIV	755101	T	C	TRUE	0	0	1	0	-1	0	0	0.988	7.11021	FALSE	NA	NA	30	1372	664	240	FALSE	TRUE	FALSE	35	3.69	TRUE	0.012	0.012	FALSE
chrIV_755257_G_C_-	YDR148C_chrIV_755257_G_C_72_2	0.267381	-0.0948166	3.82595	0.00140006	0.0269692	-1.28046	UpStream	YDR148C	YDR148C	1	TRUE	-	1	73	1	chrIV	755257	G	C	TRUE	0	0	1	-1	0	0	0	0.036	7.11021	FALSE	NA	NA	30	1372	664	240	FALSE	TRUE	FALSE	191	1.18	TRUE	0.036	0.036	TRUE
chrIV_755257_G_C_+	YDR150W_chrIV_755257_G_C_72_2	0.444815	-1.31131	3.38811	0.00358661	0.0519017	-1.94602	UpStream	YDR150W	YDR150W	1	TRUE	+	1	73	1	chrIV	755257	G	C	TRUE	0	0	1	-1	0	0	0	0.036	4.3641	FALSE	NA	NA	65	1129	635	273	FALSE	FALSE	FALSE	371	1.18	TRUE	0.036	0.036	TRUE
chrIV_769328_G_A_-	YDR155C_chrIV_769328_G_A_72_2	-0.0387541	1.20328	-0.236528	0.815912	0.938221	-6.30017	UpStream	YDR155C	YDR155C	1	TRUE	-	1	73	1	chrIV	769328	G	A	TRUE	0	1	0	-1	0	0	0	NA	11.3915	FALSE	NA	NA	59	883	190	68	FALSE	TRUE	FALSE	328	1.79	TRUE	NA	NA	NA
chrIV_778909_A_AT_+	YDR161W_5UTR_0_2	-0.083889	-0.348496	-0.713348	0.48107	0.74524	-6.22976	TSS	YDR161W	YDR161W	1	TRUE	+	1	34	1	chrIV	778909	A	AT	FALSE	1	0	0	0	1	0	0	0.017	6.5962	FALSE	0.0746994	0.0568614	13	1051	531	229	FALSE	FALSE	FALSE	134	1.8	TRUE	0.017	0.017	TRUE
chrIV_784282_T_C_-	YDR164C_5UTR_0_2	0.0139852	0.50364	0.185895	0.853762	0.941458	-6.74237	TSS	YDR164C	YDR164C	1	TRUE	-	1	120	1	chrIV	784282	T	C	TRUE	0	0	1	0	-1	0	0	0.037	5.46398	TRUE	0.0556915	0.0416132	34	1141	576	244	FALSE	TRUE	FALSE	67	4.82	TRUE	0.037	0.037	TRUE
chrIV_811697_T_C_-	YDR173C_5UTR_0_21	0.0557206	-0.599495	1.06935	0.293327	0.586847	-6.71286	TSS	YDR173C	YDR173C	1	TRUE	-	2	130	1	chrIV	811697	T	C	TRUE	0	0	1	0	-1	0	0	0.673	4.09807	FALSE	NA	NA	9	NA	NA	NA	FALSE	FALSE	FALSE	65	0.55	TRUE	0.327	0.327	FALSE
chrIV_811818_G_A_+	YDR174W_chrIV_811818_G_A_72_2	0.329488	1.56123	2.43261	0.0266007	0.175596	-3.81502	UpStream	YDR174W	YDR174W	1	TRUE	+	1	73	1	chrIV	811818	G	A	TRUE	0	1	0	-1	0	0	0	0.109	8.52928	FALSE	NA	NA	107	542	103	29	FALSE	FALSE	FALSE	292	1.78	TRUE	0.109	NA	NA
chrIV_811818_G_A_-	YDR173C_5UTR_0_12	0.0179159	-0.61937	0.382232	0.704948	0.882788	-7.27542	TSS	YDR173C	YDR173C	1	TRUE	-	2	9	2	chrIV	811818	G	A	TRUE	0	1	0	-1	0	0	0	0.109	4.09807	FALSE	NA	NA	9	NA	NA	NA	FALSE	FALSE	FALSE	186	1.78	TRUE	0.109	NA	NA
chrIV_816631_TAA_TA_+	YDR177W_chrIV_816631_TAA_TA_72_2	0.101799	0.460717	1.65368	0.116942	0.395321	-5.48484	UpStream	YDR177W	YDR177W	1	TRUE	+	1	72	1	chrIV	816631	TAA	TA	FALSE	-1	-1	0	0	0	0	0	0.464	8.11985	TRUE	0.00937918	0.0063054	22	575	261	122	FALSE	TRUE	FALSE	247	NA	FALSE	0.464	NA	NA
chrIV_816707_G_C_+	YDR177W_chrIV_816707_G_C_72_2	0.277995	-0.279176	2.47325	0.0245005	0.166373	-4.05037	UpStream	YDR177W	YDR177W	1	TRUE	+	1	73	1	chrIV	816707	G	C	TRUE	0	0	1	-1	0	0	0	0.007913	8.11985	TRUE	0.00937918	0.0063054	22	575	261	122	FALSE	TRUE	FALSE	171	NA	FALSE	0.007913	0.007913	TRUE
chrIV_817729_G_GT_+	YDR178W_5UTR_0_2	0.401613	-0.203965	4.07865	0.000301607	0.00678057	-0.124693	TSS	YDR178W	YDR178W	1	TRUE	+	1	26	1	chrIV	817729	G	GT	FALSE	1	0	0	0	1	0	0	0.164	6.35033	FALSE	0.0857508	0.0586336	11	880	203	52	FALSE	FALSE	TRUE	221	NA	FALSE	0.164	0.164	TRUE
chrIV_819242_A_G_-	YDR179C_5UTR_0_2	-0.0764451	-1.59833	-0.753501	0.456944	0.728155	-6.58146	TSS	YDR179C	YDR179C	1	TRUE	-	1	107	1	chrIV	819242	A	G	TRUE	0	-1	0	1	0	0	0	0.767	5.10091	FALSE	0.22286	0.169926	20	749	207	94	FALSE	FALSE	FALSE	46	NA	FALSE	0.233	0.233	FALSE
chrIV_821075_T_TAAA_+	YDR180W_5UTR_0_21	0.0408382	-0.399026	0.627469	0.535036	0.78446	-6.7662	TSS	YDR180W	YDR180W	1	TRUE	+	2	68	1	chrIV	821075	T	TAAA	FALSE	3	3	0	0	0	0	0	0.367	3.25127	TRUE	NA	NA	26	1090	412	181	FALSE	TRUE	FALSE	220	0.76	TRUE	0.367	0.367	TRUE
chrIV_821138_G_A_+	YDR180W_5UTR_0_12	0.186943	-0.322412	2.30423	0.0282139	0.169563	-4.54077	TSS	YDR180W	YDR180W	1	TRUE	+	2	131	2	chrIV	821138	G	A	TRUE	0	1	0	-1	0	0	0	0.006924	3.25127	TRUE	NA	NA	26	1090	412	181	FALSE	TRUE	FALSE	157	NA	FALSE	0.006924	0.006924	TRUE
chrIV_831133_A_G_-	YDR183C-A_chrIV_831133_A_G_72_2	0.165839	-1.34529	1.82041	0.0867403	0.331318	-5.33153	UpStream	YDR183C-A	YDR183C-A	1	TRUE	-	1	73	1	chrIV	831133	A	G	TRUE	0	-1	0	1	0	0	0	0.481	4.04111	FALSE	NA	NA	NA	NA	NA	NA	FALSE	FALSE	FALSE	479	3.61	TRUE	0.481	0.481	TRUE
chrIV_844392_A_T_+	YDR193W_chrIV_844392_A_T_72_2	-0.155526	-0.20851	-2.04849	0.0566362	0.26777	-4.8897	UpStream	YDR193W	YDR193W	1	TRUE	+	1	73	1	chrIV	844392	A	T	TRUE	0	-1	0	0	1	0	0	0.405	NA	FALSE	NA	NA	NA	302	53	17	FALSE	FALSE	FALSE	162	3.78	TRUE	0.405	0.405	TRUE
chrIV_844958_G_A_-	YDR192C_5UTR_0_2	-0.0715964	-1.11756	-0.962655	0.343315	0.64136	-6.72911	TSS	YDR192C	YDR192C	1	TRUE	-	1	106	1	chrIV	844958	G	A	TRUE	0	1	0	-1	0	0	0	0.014	4.77144	FALSE	0.241927	0.196769	57	766	167	67	FALSE	FALSE	FALSE	97	NA	FALSE	0.014	0.014	TRUE
chrIV_848316_A_G_+	YDR195W_5UTR_0_2	0.0681192	0.80347	1.26932	0.213958	0.505735	-6.37657	TSS	YDR195W	YDR195W	1	TRUE	+	1	101	1	chrIV	848316	A	G	TRUE	0	-1	0	1	0	0	0	0.157	5.19822	FALSE	NA	NA	37	1104	599	245	FALSE	FALSE	FALSE	283	NA	FALSE	0.157	0.157	TRUE
chrIV_851053_A_C_+	YDR197W_chrIV_851053_A_C_72_2	0.137461	-0.689143	1.21016	0.243136	0.579507	-6.0467	UpStream	YDR197W	YDR197W	1	TRUE	+	1	73	1	chrIV	851053	A	C	TRUE	0	-1	1	0	0	0	0	0.005935	5.13799	FALSE	NA	NA	4	689	293	121	FALSE	FALSE	FALSE	175	NA	FALSE	0.005935	0.005935	TRUE
chrIV_867677_G_A_-	YDR207C_chrIV_867677_G_A_72_2	-0.303395	-1.1653	-3.15801	0.00586596	0.0722024	-2.65021	UpStream	YDR207C	YDR207C	1	TRUE	-	1	73	1	chrIV	867677	G	A	TRUE	0	1	0	-1	0	0	0	0.628	4.57316	FALSE	0.172298	0.119249	38	1765	918	493	TRUE	FALSE	FALSE	155	NA	FALSE	0.372	0.372	FALSE
chrIV_867831_A_C_-	YDR207C_chrIV_867831_A_C_72_2	0.0462186	-0.319127	0.554202	0.586817	0.839627	-6.67613	UpStream	YDR207C	YDR207C	1	TRUE	-	1	73	1	chrIV	867831	A	C	TRUE	0	-1	1	0	0	0	0	0.667	4.57316	FALSE	0.172298	0.119249	38	1765	918	493	TRUE	FALSE	FALSE	309	8.21	TRUE	0.333	0.333	FALSE
chrIV_867984_TA_T_+	YDR208W_5UTR_0_211	0.0306886	0.769903	0.509429	0.614129	0.838453	-6.77948	TSS	YDR208W	YDR208W	1	TRUE	+	3	29	1	chrIV	867984	TA	T	FALSE	-1	-1	0	0	0	0	0	0.876	5.77517	TRUE	NA	NA	18	878	493	253	FALSE	TRUE	FALSE	240	NA	FALSE	0.124	NA	NA
chrIV_867989_A_G_+	YDR208W_chrIV_867989_A_G_72_2	-0.270798	-0.54379	-2.8854	0.0104471	0.102163	-3.25057	UpStream	YDR208W	YDR208W	1	TRUE	+	1	73	1	chrIV	867989	A	G	TRUE	0	-1	0	1	0	0	0	0.381	5.77517	TRUE	NA	NA	18	878	493	253	FALSE	TRUE	FALSE	235	NA	FALSE	0.381	0.381	TRUE
chrIV_868027_G_A_+	YDR208W_5UTR_0_112	0.220919	0.871215	3.00919	0.0052252	0.0587803	-2.77241	TSS	YDR208W	YDR208W	1	TRUE	+	3	72	3	chrIV	868027	G	A	TRUE	0	1	0	-1	0	0	0	0.634	5.77517	TRUE	NA	NA	18	878	493	253	FALSE	TRUE	FALSE	197	NA	FALSE	0.366	0.634	TRUE
chrIV_870855_AG_A_+	YDR210W_chrIV_870855_AG_A_72_2	0.587746	0.1529	3.60165	0.00226743	0.0379519	-1.45304	UpStream	YDR210W	YDR210W	1	TRUE	+	1	72	1	chrIV	870855	AG	A	FALSE	-1	0	0	-1	0	0	0	0.159	5.93822	FALSE	NA	NA	1	904	158	43	FALSE	FALSE	FALSE	219	5.84	TRUE	0.159	0.159	TRUE
chrIV_870950_G_GT_+	YDR210W_5UTR_0_21	0.247191	0.860844	1.4095	0.168834	0.451141	-5.14008	TSS	YDR210W	YDR210W	1	TRUE	+	2	29	1	chrIV	870950	G	GT	FALSE	1	0	0	0	1	0	0	0.546	5.93822	FALSE	NA	NA	1	904	158	43	FALSE	FALSE	FALSE	124	NA	FALSE	0.454	NA	NA
chrIV_871042_G_T_+	YDR210W_5UTR_0_12	0.132949	0.79975	0.708732	0.48389	0.746822	-5.61485	TSS	YDR210W	YDR210W	1	TRUE	+	2	121	2	chrIV	871042	G	T	TRUE	0	0	0	-1	1	0	0	0.134	5.93822	FALSE	NA	NA	1	904	158	43	FALSE	FALSE	FALSE	32	3.22	TRUE	0.134	0.134	TRUE
chrIV_887044_A_G_+	YDR212W_5UTR_0_21	-0.134696	0.919807	-2.03022	0.0511611	0.239468	-4.9652	TSS	YDR212W	YDR212W	1	TRUE	+	2	22	1	chrIV	887044	A	G	TRUE	0	-1	0	1	0	0	0	0.916	7.50591	TRUE	0.0153208	0.00953381	55	2161	833	322	FALSE	TRUE	FALSE	188	NA	FALSE	0.084	0.084	FALSE
chrIV_887046_AT_A_+	YDR212W_5UTR_0_12	0.00503496	0.987658	0.0914622	0.927725	0.975284	-6.99828	TSS	YDR212W	YDR212W	1	TRUE	+	2	24	2	chrIV	887046	AT	A	FALSE	-1	0	0	0	-1	0	0	0.469	7.50591	TRUE	0.0153208	0.00953381	55	2161	833	322	FALSE	TRUE	FALSE	186	NA	FALSE	0.469	NA	NA
chrIV_911925_G_T_+	YDR223W_5UTR_0_2	-0.112061	-0.0528348	-1.51234	0.140773	0.408805	-5.64568	TSS	YDR223W	YDR223W	1	TRUE	+	1	87	1	chrIV	911925	G	T	TRUE	0	0	0	-1	1	0	0	0.968	1.60336	FALSE	0.395713	0.309716	6	622	41	14	FALSE	FALSE	TRUE	174	NA	FALSE	0.032	0.032	FALSE
chrIV_926985_T_C_-	YDR231C_chrIV_926985_T_C_72_2	0.0814094	-1.28226	1.19702	0.248084	0.584443	-6.11093	UpStream	YDR231C	YDR231C	1	TRUE	-	1	73	1	chrIV	926985	T	C	TRUE	0	0	1	0	-1	0	0	0.563	6.65704	FALSE	0.097097	0.071979	11	683	240	120	FALSE	FALSE	FALSE	75	2.77	TRUE	0.437	0.563	TRUE
chrIV_927194_C_A_-	YDR231C_chrIV_927194_C_A_72_2	-0.143546	-0.800934	-1.62674	0.12259	0.405165	-5.51281	UpStream	YDR231C	YDR231C	1	TRUE	-	1	73	1	chrIV	927194	C	A	TRUE	0	1	-1	0	0	0	0	0.007418	6.65704	FALSE	0.097097	0.071979	11	683	240	120	FALSE	FALSE	FALSE	284	NA	FALSE	0.007418	0.007418	TRUE
chrIV_927218_C_T_-	YDR231C_chrIV_927218_C_T_72_2	-0.0598523	-0.655676	-0.545933	0.59236	0.842587	-6.75391	UpStream	YDR231C	YDR231C	1	TRUE	-	1	73	1	chrIV	927218	C	T	TRUE	0	0	-1	0	1	0	-1	0.006924	6.65704	FALSE	0.097097	0.071979	11	683	240	120	FALSE	FALSE	FALSE	308	NA	FALSE	0.006924	0.006924	TRUE
chrIV_927223_C_A_-	YDR231C_chrIV_927223_C_A_72_2	0.0152709	-0.748338	0.179544	0.85968	0.953981	-6.91969	UpStream	YDR231C	YDR231C	1	TRUE	-	1	73	1	chrIV	927223	C	A	TRUE	0	1	-1	0	0	0	0	0.018	6.65704	FALSE	0.097097	0.071979	11	683	240	120	FALSE	FALSE	FALSE	313	NA	FALSE	0.018	0.018	TRUE
chrIV_927319_C_CT_-	YDR231C_chrIV_927319_C_CT_72_2	1.16609	1.66386	2.45783	0.0252782	0.169622	-3.28105	UpStream	YDR231C	YDR231C	1	TRUE	-	1	73	1	chrIV	927319	C	CT	FALSE	1	0	0	0	1	0	0	0.727	6.65704	FALSE	0.097097	0.071979	11	683	240	120	FALSE	FALSE	FALSE	409	NA	FALSE	0.273	NA	NA
chrIV_927438_G_GT_-	YDR231C_chrIV_927438_G_GT_72_2	0.0483425	-0.518855	0.559727	0.583127	0.838264	-6.64454	UpStream	YDR231C	YDR231C	1	TRUE	-	1	73	1	chrIV	927438	G	GT	FALSE	1	0	0	0	1	0	0	0.748	6.65704	FALSE	0.097097	0.071979	11	683	240	120	FALSE	FALSE	FALSE	528	3.32	TRUE	0.252	NA	NA
chrIV_936290_A_T_+	YDR237W_chrIV_936290_A_T_72_2	-0.634256	-1.09093	-5.17201	8.2039e-05	0.00310705	1.56947	UpStream	YDR237W	YDR237W	1	TRUE	+	1	73	1	chrIV	936290	A	T	TRUE	0	-1	0	0	1	0	0	0.956	5.99361	FALSE	NA	NA	22	NA	NA	NA	FALSE	FALSE	FALSE	325	1.51	TRUE	0.044	0.044	FALSE
chrIV_936485_T_A_+	YDR237W_chrIV_936485_T_A_72_2	0.0514516	-1.75631	0.672349	0.510596	0.798937	-6.57457	UpStream	YDR237W	YDR237W	1	TRUE	+	1	73	1	chrIV	936485	T	A	TRUE	0	1	0	0	-1	0	0	0.956	5.99361	FALSE	NA	NA	22	NA	NA	NA	FALSE	FALSE	FALSE	130	3.74	TRUE	0.044	0.044	FALSE
chrIV_940972_G_C_-	YDR238C_chrIV_940972_G_C_72_2	0.052537	-0.380562	0.661979	0.517053	0.802888	-6.44863	UpStream	YDR238C	YDR238C	1	TRUE	-	1	73	1	chrIV	940972	G	C	TRUE	0	0	1	-1	0	0	0	0.947	6.98839	TRUE	NA	NA	65	2014	1023	519	FALSE	TRUE	FALSE	156	4.93	TRUE	0.053	0.947	TRUE
chrIV_940995_T_A_-	YDR238C_chrIV_940995_T_A_72_2	0.0752862	0.290729	0.965396	0.348176	0.68272	-6.14251	UpStream	YDR238C	YDR238C	1	TRUE	-	1	73	1	chrIV	940995	T	A	TRUE	0	1	0	0	-1	0	0	0.989	6.98839	TRUE	NA	NA	65	2014	1023	519	FALSE	TRUE	FALSE	179	4.93	TRUE	0.011	0.011	FALSE
chrIV_955620_A_C_+	YDR247W_5UTR_0_2	0.013121	-0.109036	0.0414967	0.967171	0.992023	-5.9303	TSS	YDR247W	YDR247W	1	TRUE	+	1	121	1	chrIV	955620	A	C	TRUE	0	-1	1	0	0	0	0	0.957	3.82139	FALSE	NA	NA	67	897	239	89	FALSE	FALSE	TRUE	393	NA	FALSE	0.043	0.043	FALSE
chrIV_963291_G_A_+	YDR252W_5UTR_0_2	0.177282	0.0713146	0.882369	0.3845	0.674045	-5.49472	TSS	YDR252W	YDR252W	1	TRUE	+	1	32	1	chrIV	963291	G	A	TRUE	0	1	0	-1	0	0	0	0.68	3.52783	FALSE	0.0843307	0.0678108	21	727	148	56	FALSE	TRUE	TRUE	121	NA	FALSE	0.32	0.32	FALSE
chrIV_964572_CT_C_+	YDR254W_chrIV_964572_CT_C_72_2	0.249663	-1.21104	1.40688	0.177875	0.489986	-5.5362	UpStream	YDR254W	YDR254W	1	TRUE	+	1	72	1	chrIV	964572	CT	C	FALSE	-1	0	0	0	-1	0	0	0.63	4.22767	FALSE	NA	NA	33	946	204	86	FALSE	FALSE	FALSE	541	0.79	TRUE	0.37	0.63	TRUE
chrIV_964930_C_A_+	YDR254W_5UTR_0_21	0.095312	-0.408713	0.63926	0.527441	0.777845	-6.10621	TSS	YDR254W	YDR254W	1	TRUE	+	2	34	1	chrIV	964930	C	A	TRUE	0	1	-1	0	0	0	0	0.001978	4.22767	FALSE	NA	NA	33	946	204	86	FALSE	FALSE	FALSE	183	NA	FALSE	0.001978	0.001978	TRUE
chrIV_964950_A_G_+	YDR254W_5UTR_0_12	0.115072	-0.423234	0.978115	0.335736	0.634075	-5.86392	TSS	YDR254W	YDR254W	1	TRUE	+	2	54	2	chrIV	964950	A	G	TRUE	0	-1	0	1	0	0	0	0.622	4.22767	FALSE	NA	NA	33	946	204	86	FALSE	FALSE	FALSE	163	NA	FALSE	0.378	0.378	FALSE
chrIV_974630_A_G_-	YDR258C_chrIV_974630_A_G_72_2	-0.00520355	-0.62451	-0.0624914	0.950916	0.982497	-6.66536	UpStream	YDR258C	YDR258C	1	TRUE	-	1	73	1	chrIV	974630	A	G	TRUE	0	-1	0	1	0	0	0	0.963	5.82038	FALSE	0.0396603	0.0282985	28	582	206	71	FALSE	TRUE	FALSE	387	2.2	TRUE	0.037	0.037	FALSE
chrIV_976036_A_G_-	YDR259C_chrIV_976036_A_G_72_2	0.140531	-0.630597	1.34577	0.196437	0.519257	-5.59926	UpStream	YDR259C	YDR259C	1	TRUE	-	1	73	1	chrIV	976036	A	G	TRUE	0	-1	0	1	0	0	0	0.002973	4.28018	FALSE	NA	NA	49	568	83	25	TRUE	FALSE	TRUE	254	1.71	TRUE	0.002973	0.002973	TRUE
chrIV_976174_G_A_-	YDR259C_chrIV_976174_G_A_72_2	0.226206	0.777136	2.64577	0.0172125	0.138538	-3.58984	UpStream	YDR259C	YDR259C	1	TRUE	-	1	73	1	chrIV	976174	G	A	TRUE	0	1	0	-1	0	0	0	0.543	4.28018	FALSE	NA	NA	49	568	83	25	TRUE	FALSE	TRUE	392	2.03	TRUE	0.457	0.457	FALSE
chrIV_976264_A_G_-	YDR259C_chrIV_976264_A_G_72_2	0.146834	0.926639	1.49552	0.153514	0.453139	-5.46506	UpStream	YDR259C	YDR259C	1	TRUE	-	1	73	1	chrIV	976264	A	G	TRUE	0	-1	0	1	0	0	-1	0.526	4.28018	FALSE	NA	NA	49	568	83	25	TRUE	FALSE	TRUE	482	NA	FALSE	0.474	0.474	FALSE
chrIV_976271_T_C_-	YDR259C_chrIV_976271_T_C_72_2	0.342013	-0.0862263	2.98872	0.0084025	0.0904838	-2.94018	UpStream	YDR259C	YDR259C	1	TRUE	-	1	73	1	chrIV	976271	T	C	TRUE	0	0	1	0	-1	0	0	0.076	4.28018	FALSE	NA	NA	49	568	83	25	TRUE	FALSE	TRUE	489	NA	FALSE	0.076	0.076	TRUE
chrIV_976707_C_T_-	YDR259C_chrIV_976707_C_T_72_2	0.238903	1.01049	2.94753	0.00916613	0.0943858	-3.11068	UpStream	YDR259C	YDR259C	1	TRUE	-	1	73	1	chrIV	976707	C	T	TRUE	0	0	-1	0	1	0	0	0.001984	4.28018	FALSE	NA	NA	49	568	83	25	TRUE	FALSE	TRUE	925	2.38	TRUE	0.001984	0.001984	TRUE
chrIV_977331_ATTT_ATT_-	YDR260C_5UTR_0_2	-0.0612618	-0.0583904	-1.33261	0.19256	0.477856	-6.3469	TSS	YDR260C	YDR260C	1	TRUE	-	1	83	1	chrIV	977331	ATTT	ATT	FALSE	-1	0	0	0	-1	0	0	0.516	5.98729	FALSE	NA	NA	25	1113	258	98	FALSE	FALSE	FALSE	102	3.02	TRUE	0.484	0.484	FALSE
chrIV_977428_C_T_-	YDR260C_chrIV_977428_C_T_72_2	0.0164194	0.267796	0.229984	0.820909	0.940437	-6.69588	UpStream	YDR260C	YDR260C	1	TRUE	-	1	73	1	chrIV	977428	C	T	TRUE	0	0	-1	0	1	0	-1	0.488	5.98729	FALSE	NA	NA	25	1113	258	98	FALSE	FALSE	FALSE	199	5.47	TRUE	0.488	0.512	FALSE
chrIV_979983_A_G_-	YDR261C_chrIV_979983_A_G_72_2	0.131962	-1.00543	0.921679	0.369874	0.703466	-6.15735	UpStream	YDR261C	YDR261C	1	TRUE	-	1	73	1	chrIV	979983	A	G	TRUE	0	-1	0	1	0	0	0	0.655	5.60201	FALSE	NA	NA	3	499	87	29	FALSE	FALSE	FALSE	774	4.86	TRUE	0.345	0.345	FALSE
chrIV_992705_T_C_+	tG(GCC)D2_chrIV_992705_T_C_72_2	-0.0970528	-0.932341	-0.97531	0.343381	0.68074	-6.29408	UpStream	tG(GCC)D2	tG(GCC)D2	1	TRUE	+	1	73	1	chrIV	992705	T	C	TRUE	0	0	1	0	-1	0	0	NA	NA	FALSE	NA	NA	NA	NA	NA	NA	FALSE	FALSE	FALSE	127	0.58	TRUE	NA	NA	NA
chrIV_993025_T_A_+	YDR262W_chrIV_993025_T_A_72_2	-0.42868	0.0962922	-1.73852	0.100595	0.360223	-4.59554	UpStream	YDR262W	YDR262W	1	TRUE	+	1	73	1	chrIV	993025	T	A	TRUE	0	1	0	0	-1	0	1	0.862	6.60532	FALSE	NA	NA	NA	881	161	47	FALSE	FALSE	FALSE	109	NA	FALSE	0.138	NA	NA
chrIV_998484_T_C_-	YDR264C_chrIV_998484_T_C_72_2	-0.69685	-1.0841	-7.78047	6.15337e-07	0.00013095	6.36722	UpStream	YDR264C	YDR264C	1	TRUE	-	1	73	1	chrIV	998484	T	C	TRUE	0	0	1	0	-1	0	0	0.97	6.67743	FALSE	NA	NA	54	791	252	71	FALSE	TRUE	TRUE	161	NA	FALSE	0.03	0.03	FALSE
chrIV_998628_A_T_+	YDR265W_5UTR_0_2	-0.0373278	-0.433017	-0.60388	0.550402	0.79282	-6.93435	TSS	YDR265W	YDR265W	1	TRUE	+	1	139	1	chrIV	998628	A	T	TRUE	0	-1	0	0	1	0	1	0.811	5.31765	FALSE	0.232888	0.168193	23	1410	418	127	FALSE	TRUE	FALSE	236	NA	FALSE	0.189	0.189	FALSE
chrIV_998628_A_T_-	YDR264C_chrIV_998628_A_T_72_2	0.217312	-0.587207	1.37248	0.188142	0.505901	-5.76225	UpStream	YDR264C	YDR264C	1	TRUE	-	1	73	1	chrIV	998628	A	T	TRUE	0	-1	0	0	1	0	0	0.811	6.67743	FALSE	NA	NA	54	791	252	71	FALSE	TRUE	TRUE	305	NA	FALSE	0.189	0.189	FALSE
chrIV_1002291_AT_A_-	YDR266C_5UTR_0_2	0.175165	0.870082	1.54642	0.13235	0.396136	-5.44773	TSS	YDR266C	YDR266C	1	TRUE	-	1	93	1	chrIV	1002291	AT	A	FALSE	-1	0	0	0	-1	0	0	0.509	5.81103	FALSE	0.0953227	0.0689088	18	1011	161	41	FALSE	TRUE	FALSE	268	NA	FALSE	0.491	NA	NA
chrIV_1003824_C_T_-	YDR267C_chrIV_1003824_C_T_72_2	-0.0947255	-1.19752	-0.636	0.533432	0.809751	-6.3036	UpStream	YDR267C	YDR267C	1	TRUE	-	1	73	1	chrIV	1003824	C	T	TRUE	0	0	-1	0	1	0	0	0.991	6.03212	TRUE	0.0480684	0.0327526	11	212	120	48	FALSE	TRUE	FALSE	322	NA	FALSE	0.009	0.009	FALSE
chrIV_1003824_C_T_+	YDR268W_5UTR_0_2	-0.245221	-0.663274	-3.99754	0.000377479	0.00812517	-0.582871	TSS	YDR268W	YDR268W	1	TRUE	+	1	16	1	chrIV	1003824	C	T	TRUE	0	0	-1	0	1	0	0	0.991	4.80085	FALSE	0.0789717	0.0542736	3	555	13	2	FALSE	TRUE	FALSE	180	NA	FALSE	0.009	0.009	FALSE
chrIV_1016050_T_C_-	YDR277C_chrIV_1016050_T_C_72_2	0.0384462	1.26293	0.161458	0.873678	0.956036	-5.70693	UpStream	YDR277C	YDR277C	1	TRUE	-	1	73	1	chrIV	1016050	T	C	TRUE	0	0	1	0	-1	0	0	0.972	5.09573	FALSE	0.069131	0.0521367	27	761	104	41	FALSE	FALSE	TRUE	348	1.54	TRUE	0.028	0.028	FALSE
chrIV_1016051_A_G_-	YDR277C_chrIV_1016051_A_G_72_2	-0.0818955	1.47275	-0.453818	0.655826	0.875702	-5.99229	UpStream	YDR277C	YDR277C	1	TRUE	-	1	73	1	chrIV	1016051	A	G	TRUE	0	-1	0	1	0	0	0	0.019	5.09573	FALSE	0.069131	0.0521367	27	761	104	41	FALSE	FALSE	TRUE	349	1.54	TRUE	0.019	0.019	TRUE
chrIV_1022417_A_G_-	YDR281C_5UTR_0_2	0.170629	0.427474	1.07031	0.292901	0.58646	-5.6334	TSS	YDR281C	YDR281C	1	TRUE	-	1	80	1	chrIV	1022417	A	G	TRUE	0	-1	0	1	0	0	0	0.982	3.2599	FALSE	0.324236	0.228497	2	830	146	53	FALSE	FALSE	FALSE	96	5.54	TRUE	0.018	0.018	FALSE
chrIV_1045331_A_G_-	YDR292C_chrIV_1045331_A_G_72_2	1.29214	-1.713	5.42942	4.86454e-05	0.00217396	2.04194	UpStream	YDR292C	YDR292C	1	TRUE	-	1	73	1	chrIV	1045331	A	G	TRUE	0	-1	0	1	0	0	0	0.129	6.46187	TRUE	NA	NA	11	1189	573	228	FALSE	TRUE	FALSE	320	3.62	TRUE	0.129	0.129	TRUE
chrIV_1052356_AT_A_-	YDR294C_5UTR_0_2	-0.109527	0.769304	-1.02947	0.311377	0.6054	-5.83518	TSS	YDR294C	YDR294C	1	TRUE	-	1	55	1	chrIV	1052356	AT	A	FALSE	-1	0	0	0	-1	0	0	0.963	6.41601	FALSE	0.078687	0.056537	4	789	300	106	FALSE	TRUE	FALSE	128	NA	FALSE	0.037	0.037	FALSE
chrIV_1055136_G_GA_+	YDR296W_5UTR_0_2	-0.0145339	0.172398	-0.233276	0.81711	0.929726	-7.10899	TSS	YDR296W	YDR296W	1	TRUE	+	1	122	1	chrIV	1055136	G	GA	FALSE	1	1	0	0	0	0	0	0.687	6.44713	FALSE	NA	NA	40	747	73	25	FALSE	FALSE	FALSE	76	2.67	TRUE	0.313	0.687	TRUE
chrIV_1056271_T_C_+	YDR297W_chrIV_1056271_T_C_72_2	-0.0229169	1.5684	-0.273768	0.787634	0.93075	-6.56065	UpStream	YDR297W	YDR297W	1	TRUE	+	1	73	1	chrIV	1056271	T	C	TRUE	0	0	1	0	-1	0	0	0.781	6.49113	FALSE	0.0451434	0.029847	36	628	243	84	FALSE	FALSE	FALSE	280	NA	FALSE	0.219	0.219	FALSE
chrIV_1058864_C_T_+	YDR299W_chrIV_1058864_C_T_72_2	0.241339	-0.258901	1.74641	0.0991808	0.356875	-5.02669	UpStream	YDR299W	YDR299W	1	TRUE	+	1	73	1	chrIV	1058864	C	T	TRUE	0	0	-1	0	1	0	0	0.969	6.9868	TRUE	NA	NA	42	606	176	65	FALSE	TRUE	FALSE	763	NA	FALSE	0.031	0.031	FALSE
chrIV_1059080_G_A_-	YDR298C_5UTR_0_21	0.103844	0.383161	1.20299	0.238264	0.531713	-6.33022	TSS	YDR298C	YDR298C	1	TRUE	-	2	25	1	chrIV	1059080	G	A	TRUE	0	1	0	-1	0	0	0	0.645	8.94932	FALSE	NA	NA	14	755	217	63	FALSE	TRUE	FALSE	266	NA	FALSE	0.355	0.645	TRUE
chrIV_1059094_C_T_-	YDR298C_5UTR_0_12	-0.000239549	0.330023	-0.00282683	0.997763	0.99908	-7.03776	TSS	YDR298C	YDR298C	1	TRUE	-	2	11	2	chrIV	1059094	C	T	TRUE	0	0	-1	0	1	0	0	0.777	8.94932	FALSE	NA	NA	14	755	217	63	FALSE	TRUE	FALSE	280	NA	FALSE	0.223	0.223	FALSE
chrIV_1059399_G_C_+	YDR299W_chrIV_1059399_G_C_72_2	0.0727163	0.390262	0.686514	0.501849	0.796599	-6.16528	UpStream	YDR299W	YDR299W	1	TRUE	+	1	73	1	chrIV	1059399	G	C	TRUE	0	0	1	-1	0	0	0	0.619	6.9868	TRUE	NA	NA	42	606	176	65	FALSE	TRUE	FALSE	228	0.34	TRUE	0.381	0.619	TRUE
chrIV_1059459_A_C_-	YDR298C_chrIV_1059459_A_C_72_2	-0.0452394	-1.17173	-0.333373	0.743019	0.916201	-6.60389	UpStream	YDR298C	YDR298C	1	TRUE	-	1	73	1	chrIV	1059459	A	C	TRUE	0	-1	1	0	0	0	0	0.734	8.94932	FALSE	NA	NA	14	755	217	63	FALSE	TRUE	FALSE	645	2.38	TRUE	0.266	0.266	FALSE
chrIV_1071689_A_G_-	YDR303C_5UTR_0_21	-0.0281784	0.412336	-0.25251	0.802346	0.922045	-6.57171	TSS	YDR303C	YDR303C	1	TRUE	-	2	134	1	chrIV	1071689	A	G	TRUE	0	-1	0	1	0	0	0	0.003465	4.8833	TRUE	NA	NA	53	694	160	64	TRUE	FALSE	TRUE	303	2.13	TRUE	0.003465	0.003465	TRUE
chrIV_1071771_G_A_-	YDR303C_5UTR_0_12	0.177543	0.510681	1.79266	0.0829823	0.308437	-5.05038	TSS	YDR303C	YDR303C	1	TRUE	-	2	52	2	chrIV	1071771	G	A	TRUE	0	1	0	-1	0	0	0	0.425	4.8833	TRUE	NA	NA	53	694	160	64	TRUE	FALSE	TRUE	385	NA	FALSE	0.425	0.425	TRUE
chrIV_1101892_G_C_+	YDR317W_chrIV_1101892_G_C_72_2	0.341349	-2.23156	2.5171	0.0224109	0.158221	-3.81424	UpStream	YDR317W	YDR317W	1	TRUE	+	1	73	1	chrIV	1101892	G	C	TRUE	0	0	1	-1	0	0	0	0.027	NA	FALSE	NA	NA	1	431	96	27	FALSE	FALSE	FALSE	292	0.49	TRUE	0.027	0.027	TRUE
chrIV_1101983_CTT_CTTTT_+	YDR317W_chrIV_1101983_CTT_CTTTT_72_2	-0.0247444	-1.56896	-0.226993	0.823196	0.941961	-6.52582	UpStream	YDR317W	YDR317W	1	TRUE	+	1	73	1	chrIV	1101983	CTT	CTTTT	FALSE	2	0	0	0	2	0	0	0.179	NA	FALSE	NA	NA	1	431	96	27	FALSE	FALSE	FALSE	201	NA	FALSE	0.179	NA	NA
chrIV_1105909_ATT_AT_-	YDR319C_5UTR_0_2	0.563763	0.0979167	5.27068	1.04384e-05	0.000502863	3.33308	TSS	YDR319C	YDR319C	1	TRUE	-	1	142	1	chrIV	1105909	ATT	AT	FALSE	-1	0	0	0	-1	0	0	0.515	5.92096	FALSE	0.144364	0.104483	2	393	93	33	FALSE	FALSE	FALSE	82	NA	FALSE	0.485	NA	NA
chrIV_1108233_C_CAT_-	YDR320C_5UTR_0_2	-0.0195097	-0.511782	-0.169216	0.866747	0.946591	-6.69506	TSS	YDR320C	YDR320C	1	TRUE	-	1	38	1	chrIV	1108233	C	CAT	FALSE	2	1	0	0	1	1	0	0.663	5.45197	FALSE	NA	NA	13	790	438	246	FALSE	FALSE	FALSE	132	1.62	TRUE	0.337	0.663	TRUE
chrIV_1108564_G_A_+	YDR321W_5UTR_0_211	0.072989	0.375633	0.729272	0.471416	0.740549	-6.29103	TSS	YDR321W	YDR321W	1	TRUE	+	3	38	1	chrIV	1108564	G	A	TRUE	0	1	0	-1	0	0	0	0.00297	6.89169	FALSE	0.0588606	0.0416403	9	344	65	19	FALSE	FALSE	FALSE	138	NA	FALSE	0.00297	0.00297	TRUE
chrIV_1108600_GAAA_GA_-	YDR320C-A_chrIV_1108600_GAAA_GA_72_2	0.116436	0.269114	0.56192	0.581665	0.838075	-5.75245	UpStream	YDR320C-A	YDR320C-A	1	TRUE	-	1	74	1	chrIV	1108600	GAAA	GA	FALSE	-2	-2	0	0	0	0	0	0.261	7.99522	TRUE	NA	NA	33	NA	NA	NA	FALSE	FALSE	FALSE	102	NA	FALSE	0.261	NA	NA
chrIV_1108600_GAAA_GA_+	YDR321W_5UTR_0_121	0.0528706	0.35824	0.678352	0.502679	0.759397	-6.48698	TSS	YDR321W	YDR321W	1	TRUE	+	3	74	2	chrIV	1108600	GAAA	GA	FALSE	-2	-2	0	0	0	0	0	0.261	6.89169	FALSE	0.0588606	0.0416403	9	344	65	19	FALSE	FALSE	FALSE	102	NA	FALSE	0.261	NA	NA
chrIV_1108662_G_A_+	YDR321W_5UTR_0_112	0.0547388	0.362568	0.664795	0.511193	0.765086	-6.48405	TSS	YDR321W	YDR321W	1	TRUE	+	3	136	3	chrIV	1108662	G	A	TRUE	0	1	0	-1	0	0	0	0.989	6.89169	FALSE	0.0588606	0.0416403	9	344	65	19	FALSE	FALSE	FALSE	40	1.34	TRUE	0.011	0.011	FALSE
chrIV_1108662_G_A_-	YDR320C-A_chrIV_1108662_G_A_72_2	0.0482894	0.0983814	0.429653	0.672963	0.885648	-6.45169	UpStream	YDR320C-A	YDR320C-A	1	TRUE	-	1	73	1	chrIV	1108662	G	A	TRUE	0	1	0	-1	0	0	0	0.989	7.99522	TRUE	NA	NA	33	NA	NA	NA	FALSE	FALSE	FALSE	164	1.34	TRUE	0.011	0.011	FALSE
chrIV_1108673_C_G_-	YDR320C-A_chrIV_1108673_C_G_72_2	0.0422937	-0.564195	0.370473	0.715707	0.908313	-6.46059	UpStream	YDR320C-A	YDR320C-A	1	TRUE	-	1	73	1	chrIV	1108673	C	G	TRUE	0	0	-1	1	0	0	0	0.631	7.99522	TRUE	NA	NA	33	NA	NA	NA	FALSE	FALSE	FALSE	175	1.34	TRUE	0.369	0.631	TRUE
chrIV_1108696_C_G_-	YDR320C-A_chrIV_1108696_C_G_72_2	-0.12107	-0.936203	-1.08103	0.295113	0.629528	-6.1855	UpStream	YDR320C-A	YDR320C-A	1	TRUE	-	1	73	1	chrIV	1108696	C	G	TRUE	0	0	-1	1	0	0	0	0.98	7.99522	TRUE	NA	NA	33	NA	NA	NA	FALSE	FALSE	FALSE	198	1.34	TRUE	0.02	0.02	FALSE
chrIV_1110371_CA_C_+	YDR322W_chrIV_1110371_CA_C_72_2	-0.758844	-0.438778	-2.89445	0.0102504	0.100458	-2.62945	UpStream	YDR322W	YDR322W	1	TRUE	+	1	72	1	chrIV	1110371	CA	C	FALSE	-1	-1	0	0	0	0	0	0.543	5.8477	FALSE	0.112668	0.0784627	30	696	338	176	FALSE	FALSE	FALSE	218	3.44	TRUE	0.457	0.543	TRUE
chrIV_1114179_A_ATT_-	YDR323C_5UTR_0_2	-0.137321	-1.1662	-0.758623	0.453919	0.724943	-6.28614	TSS	YDR323C	YDR323C	1	TRUE	-	1	23	1	chrIV	1114179	A	ATT	FALSE	2	0	0	0	2	0	0	0.296	3.9272	FALSE	NA	NA	13	224	85	41	FALSE	FALSE	FALSE	152	3.55	TRUE	0.296	0.296	TRUE
chrIV_1116905_A_G_+	YDR325W_chrIV_1116905_A_G_72_2	0.159094	-1.15488	1.95834	0.0671803	0.289796	-5.01716	UpStream	YDR325W	YDR325W	1	TRUE	+	1	73	1	chrIV	1116905	A	G	TRUE	0	-1	0	1	0	0	1	0.412	4.72553	TRUE	NA	NA	14	884	389	179	FALSE	TRUE	FALSE	221	3.92	TRUE	0.412	0.588	FALSE
chrIV_1135584_C_T_-	YDR333C_5UTR_0_2	0.227819	0.368684	1.37392	0.17951	0.464127	-5.19547	TSS	YDR333C	YDR333C	1	TRUE	-	1	29	1	chrIV	1135584	C	T	TRUE	0	0	-1	0	1	0	0	0.55	5.61501	FALSE	NA	NA	54	520	87	28	FALSE	TRUE	FALSE	153	1.68	TRUE	0.45	0.55	TRUE
chrIV_1149565_G_A_-	YDR338C_5UTR_0_2	0.00860958	0.407214	0.169654	0.866406	0.946559	-7.0467	TSS	YDR338C	YDR338C	1	TRUE	-	1	105	1	chrIV	1149565	G	A	TRUE	0	1	0	-1	0	0	0	0.754	4.2132	FALSE	NA	NA	3	468	73	20	FALSE	TRUE	FALSE	99	2.27	TRUE	0.246	0.246	FALSE
chrIV_1150593_T_G_-	YDR339C_5UTR_0_2	-0.137976	-0.0172436	-2.69813	0.0112714	0.0983007	-4.0073	TSS	YDR339C	YDR339C	1	TRUE	-	1	90	1	chrIV	1150593	T	G	TRUE	0	0	0	1	-1	0	0	0.003972	7.44625	TRUE	0.0193276	0.0134549	8	1278	589	222	FALSE	TRUE	FALSE	73	NA	FALSE	0.003972	0.003972	TRUE
chrIV_1150827_AG_A_-	YDR339C_chrIV_1150827_AG_A_72_2	0.385772	-0.68391	2.08629	0.0526792	0.259277	-4.29087	UpStream	YDR339C	YDR339C	1	TRUE	-	1	74	1	chrIV	1150827	AG	A	FALSE	-1	0	0	-1	0	0	0	0.535	7.44625	TRUE	0.0193276	0.0134549	8	1278	589	222	FALSE	TRUE	FALSE	307	NA	FALSE	0.465	NA	NA
chrIV_1151028_A_G_-	tX(XXX)D_chrIV_1151028_A_G_72_2	0.0911529	-0.651804	0.604628	0.553587	0.824758	-6.38451	UpStream	tX(XXX)D	tX(XXX)D	1	TRUE	-	1	73	1	chrIV	1151028	A	G	TRUE	0	-1	0	1	0	0	-1	0.432	NA	FALSE	NA	NA	NA	NA	NA	NA	FALSE	FALSE	FALSE	87	1.57	TRUE	0.432	0.432	TRUE
chrIV_1151234_G_A_-	tX(XXX)D_chrIV_1151234_G_A_72_2	-0.424668	-0.895171	-3.50878	0.00276821	0.0429554	-1.79439	UpStream	tX(XXX)D	tX(XXX)D	1	TRUE	-	1	73	1	chrIV	1151234	G	A	TRUE	0	1	0	-1	0	0	0	0.776	NA	FALSE	NA	NA	NA	NA	NA	NA	FALSE	FALSE	FALSE	293	1.55	TRUE	0.224	NA	NA
chrIV_1151364_T_TGG_-	tX(XXX)D_chrIV_1151364_T_TGG_72_2	-0.0139866	-1.07276	-0.111683	0.912411	0.971543	-6.79663	UpStream	tX(XXX)D	tX(XXX)D	1	TRUE	-	1	73	1	chrIV	1151364	T	TGG	FALSE	2	0	0	2	0	0	0	0.476	NA	FALSE	NA	NA	NA	NA	NA	NA	FALSE	FALSE	FALSE	423	1.36	TRUE	0.476	0.476	TRUE
chrIV_1151365_C_G_-	tX(XXX)D_chrIV_1151365_C_G_72_2	0.0253368	-1.01484	0.19208	0.850005	0.950619	-6.73074	UpStream	tX(XXX)D	tX(XXX)D	1	TRUE	-	1	73	1	chrIV	1151365	C	G	TRUE	0	0	-1	1	0	0	0	0.534	NA	FALSE	NA	NA	NA	NA	NA	NA	FALSE	FALSE	FALSE	424	1.36	TRUE	0.466	0.534	TRUE
chrIV_1151661_A_T_-	tX(XXX)D_chrIV_1151661_A_T_72_2	0.521801	-0.480705	7.65907	7.57205e-07	0.000146531	6.12718	UpStream	tX(XXX)D	tX(XXX)D	1	TRUE	-	1	73	1	chrIV	1151661	A	T	TRUE	0	-1	0	0	1	0	0	0.872	NA	FALSE	NA	NA	NA	NA	NA	NA	FALSE	FALSE	FALSE	720	NA	FALSE	0.128	0.872	TRUE
chrIV_1174702_C_T_-	YDR349C_chrIV_1174702_C_T_72_2	-0.0808443	-1.8216	-0.614132	0.547438	0.819324	-6.37013	UpStream	YDR349C	YDR349C	1	TRUE	-	1	73	1	chrIV	1174702	C	T	TRUE	0	0	-1	0	1	0	0	0.872	6.15738	FALSE	0.154229	0.116224	NA	647	118	43	FALSE	FALSE	FALSE	526	5.52	TRUE	0.128	0.128	FALSE
chrIV_1174722_T_C_-	YDR349C_chrIV_1174722_T_C_72_2	0.414919	-1.17912	2.48854	0.0237522	0.164317	-3.72001	UpStream	YDR349C	YDR349C	1	TRUE	-	1	73	1	chrIV	1174722	T	C	TRUE	0	0	1	0	-1	0	0	0.584	6.15738	FALSE	0.154229	0.116224	NA	647	118	43	FALSE	FALSE	FALSE	546	6.49	TRUE	0.416	0.584	TRUE
chrIV_1181621_A_G_+	YDR352W_chrIV_1181621_A_G_72_2	0.0527199	-1.06912	0.546395	0.59205	0.842587	-6.68496	UpStream	YDR352W	YDR352W	1	TRUE	+	1	73	1	chrIV	1181621	A	G	TRUE	0	-1	0	1	0	0	0	0.397	5.99148	FALSE	0.106508	0.0804931	8	516	183	61	FALSE	TRUE	FALSE	180	3.02	TRUE	0.397	NA	NA
chrIV_1184604_T_A_+	YDR354W_5UTR_0_2	-0.275801	0.954542	-1.25865	0.217736	0.509505	-5.0099	TSS	YDR354W	YDR354W	1	TRUE	+	1	78	1	chrIV	1184604	T	A	TRUE	0	1	0	0	-1	0	-1	0.921	6.47859	FALSE	0.0951266	0.0685532	9	818	300	128	FALSE	FALSE	FALSE	143	2.03	TRUE	0.079	0.079	FALSE
chrIV_1189652_T_C_-	YDR357C_5UTR_0_21	0.119385	-0.947407	1.16645	0.252502	0.55212	-6.20343	TSS	YDR357C	YDR357C	1	TRUE	-	2	139	1	chrIV	1189652	T	C	TRUE	0	0	1	0	-1	0	0	0.971	6.66405	FALSE	0.111233	0.0765235	15	699	99	33	FALSE	FALSE	FALSE	85	0.86	TRUE	0.029	0.029	FALSE
chrIV_1189750_T_C_-	YDR357C_5UTR_0_12	0.00943149	-1.00605	0.136198	0.892562	0.959591	-7.10306	TSS	YDR357C	YDR357C	1	TRUE	-	2	41	2	chrIV	1189750	T	C	TRUE	0	0	1	0	-1	0	0	0.0009891	6.66405	FALSE	0.111233	0.0765235	15	699	99	33	FALSE	FALSE	FALSE	183	NA	FALSE	0.0009891	0.0009891	TRUE
chrIV_1201847_A_AT_+	YDR363W-A_chrIV_1201847_A_AT_72_2	-0.0993312	-0.608651	-0.674723	0.509124	0.798937	-6.2323	UpStream	YDR363W-A	YDR363W-A	1	TRUE	+	1	73	1	chrIV	1201847	A	AT	FALSE	1	0	0	0	1	0	0	0.608	9.11548	FALSE	NA	NA	53	1126	486	213	FALSE	FALSE	FALSE	281	2.11	TRUE	0.392	NA	NA
chrIV_1239354_C_A_+	YDR382W_5UTR_0_2	-0.271915	1.79923	-2.14436	0.040113	0.212466	-4.16189	TSS	YDR382W	YDR382W	1	TRUE	+	1	88	1	chrIV	1239354	C	A	TRUE	0	1	-1	0	0	0	0	0.519	11.3484	FALSE	NA	NA	59	1290	547	251	FALSE	TRUE	FALSE	138	NA	FALSE	0.481	0.519	TRUE
chrIV_1240919_C_T_-	YDR383C_chrIV_1240919_C_T_72_2	0.172695	-1.13809	1.26025	0.224976	0.553949	-5.6172	UpStream	YDR383C	YDR383C	1	TRUE	-	1	73	1	chrIV	1240919	C	T	TRUE	0	0	-1	0	1	0	0	0.834	5.49703	FALSE	0.0987446	0.0775582	20	761	151	52	FALSE	FALSE	FALSE	243	1.76	TRUE	0.166	0.166	FALSE
chrIV_1240959_GA_GAA_-	YDR383C_chrIV_1240959_GA_GAA_72_2	-0.163049	-0.929328	-1.30918	0.208274	0.533395	-5.63323	UpStream	YDR383C	YDR383C	1	TRUE	-	1	73	1	chrIV	1240959	GA	GAA	FALSE	1	1	0	0	0	0	0	0.293	5.49703	FALSE	0.0987446	0.0775582	20	761	151	52	FALSE	FALSE	FALSE	283	0.77	TRUE	0.293	NA	NA
chrIV_1241016_C_T_-	YDR383C_chrIV_1241016_C_T_72_2	0.174787	0.224826	1.80655	0.0889604	0.335662	-4.90203	UpStream	YDR383C	YDR383C	1	TRUE	-	1	73	1	chrIV	1241016	C	T	TRUE	0	0	-1	0	1	0	0	0.532	5.49703	FALSE	0.0987446	0.0775582	20	761	151	52	FALSE	FALSE	FALSE	340	0.77	TRUE	0.468	0.532	TRUE
chrIV_1242276_GAAA_GAA_-	YDR384C_chrIV_1242276_GAAA_GAA_72_2	-0.217552	-0.505859	-1.57469	0.134158	0.422518	-5.3172	UpStream	YDR384C	YDR384C	1	TRUE	-	1	74	1	chrIV	1242276	GAAA	GAA	FALSE	-1	-1	0	0	0	0	0	0.342	4.75691	FALSE	0.031476	0.0241658	7	386	39	6	FALSE	FALSE	FALSE	245	NA	FALSE	0.342	NA	NA
chrIV_1266919_C_A_+	YDR398W_chrIV_1266919_C_A_72_2	0.0355018	-0.907327	0.490344	0.630297	0.867088	-6.66893	UpStream	YDR398W	YDR398W	1	TRUE	+	1	73	1	chrIV	1266919	C	A	TRUE	0	1	-1	0	0	0	1	0.002967	6.73043	TRUE	0.0872146	0.0599458	35	842	510	249	FALSE	TRUE	FALSE	552	2.8	TRUE	0.002967	0.002967	TRUE
chrIV_1274074_G_GA_-	YDR402C_chrIV_1274074_G_GA_72_2	-0.016329	-2.2151	-0.0438836	0.96552	0.988373	-6.01952	UpStream	YDR402C	YDR402C	1	TRUE	-	1	73	1	chrIV	1274074	G	GA	FALSE	1	1	0	0	0	0	0	0.93	NA	FALSE	0.0964217	0.0745105	1	944	310	121	FALSE	FALSE	FALSE	371	NA	FALSE	0.07	0.07	FALSE
chrIV_1274124_G_C_+	YDR403W_chrIV_1274124_G_C_72_2	-0.10703	-0.945807	-0.799707	0.435155	0.753218	-6.45868	UpStream	YDR403W	YDR403W	1	TRUE	+	1	73	1	chrIV	1274124	G	C	TRUE	0	0	1	-1	0	0	0	0.584	1.60104	FALSE	NA	NA	13	384	92	36	FALSE	FALSE	FALSE	478	1.96	TRUE	0.416	0.584	TRUE
chrIV_1274423_C_T_+	YDR403W_5UTR_0_211	-0.26503	0.88801	-2.46878	0.0193914	0.139459	-3.63775	TSS	YDR403W	YDR403W	1	TRUE	+	3	16	1	chrIV	1274423	C	T	TRUE	0	0	-1	0	1	0	0	0.784	1.60104	FALSE	NA	NA	13	384	92	36	FALSE	FALSE	FALSE	179	1.17	TRUE	0.216	0.216	FALSE
chrIV_1274484_G_A_+	YDR403W_5UTR_0_121	-0.127251	0.967015	-0.953336	0.347938	0.645471	-5.68813	TSS	YDR403W	YDR403W	1	TRUE	+	3	77	2	chrIV	1274484	G	A	TRUE	0	1	0	-1	0	0	-1	0.786	1.60104	FALSE	NA	NA	13	384	92	36	FALSE	FALSE	FALSE	118	1.17	TRUE	0.214	0.214	FALSE
chrIV_1274509_T_A_+	YDR403W_5UTR_0_112	-0.534808	0.755712	-4.33827	0.000146222	0.00385482	0.951226	TSS	YDR403W	YDR403W	1	TRUE	+	3	102	3	chrIV	1274509	T	A	TRUE	0	1	0	0	-1	0	0	0.488	1.60104	FALSE	NA	NA	13	384	92	36	FALSE	FALSE	FALSE	93	1.17	TRUE	0.488	0.488	TRUE
chrIV_1277186_AT_A_+	YDR405W_chrIV_1277186_AT_A_72_2	-0.044721	-1.48503	-0.396891	0.696495	0.899733	-6.69496	UpStream	YDR405W	YDR405W	1	TRUE	+	1	72	1	chrIV	1277186	AT	A	FALSE	-1	0	0	0	-1	0	0	0.986	6.48283	FALSE	NA	NA	25	913	359	123	FALSE	FALSE	FALSE	460	1.35	TRUE	0.014	0.014	FALSE
chrIV_1277231_C_A_+	YDR405W_chrIV_1277231_C_A_72_2	-0.0784108	-0.373589	-1.06369	0.302673	0.640154	-6.19417	UpStream	YDR405W	YDR405W	1	TRUE	+	1	73	1	chrIV	1277231	C	A	TRUE	0	1	-1	0	0	0	1	0.902	6.48283	FALSE	NA	NA	25	913	359	123	FALSE	FALSE	FALSE	415	NA	FALSE	0.098	0.098	FALSE
chrIV_1277282_G_T_+	YDR405W_chrIV_1277282_G_T_72_2	0.0898846	-0.954548	0.888742	0.386816	0.718488	-6.48268	UpStream	YDR405W	YDR405W	1	TRUE	+	1	73	1	chrIV	1277282	G	T	TRUE	0	0	0	-1	1	0	0	0.866	6.48283	FALSE	NA	NA	25	913	359	123	FALSE	FALSE	FALSE	364	1.63	TRUE	0.134	0.134	FALSE
chrIV_1277377_A_T_+	YDR405W_chrIV_1277377_A_T_72_2	0.0510126	-0.133766	0.281664	0.781676	0.93075	-6.14735	UpStream	YDR405W	YDR405W	1	TRUE	+	1	73	1	chrIV	1277377	A	T	TRUE	0	-1	0	0	1	0	0	0.986	6.48283	FALSE	NA	NA	25	913	359	123	FALSE	FALSE	FALSE	269	1.63	TRUE	0.014	0.014	FALSE
chrIV_1277378_T_C_-	YDR404C_chrIV_1277378_T_C_72_2	-0.0217474	-0.817813	-0.105086	0.917565	0.974014	-6.12189	UpStream	YDR404C	YDR404C	1	TRUE	-	1	73	1	chrIV	1277378	T	C	TRUE	0	0	1	0	-1	0	-1	0.362	7.01125	TRUE	NA	NA	55	947	590	232	FALSE	TRUE	FALSE	209	1.63	TRUE	0.362	0.362	TRUE
chrIV_1277378_T_C_+	YDR405W_chrIV_1277378_T_C_72_2	-0.286992	-0.457624	-2.08425	0.0528861	0.259517	-4.44394	UpStream	YDR405W	YDR405W	1	TRUE	+	1	73	1	chrIV	1277378	T	C	TRUE	0	0	1	0	-1	0	0	0.362	6.48283	FALSE	NA	NA	25	913	359	123	FALSE	FALSE	FALSE	268	1.63	TRUE	0.362	0.362	TRUE
chrIV_1278481_C_G_+	YDR406W_chrIV_1278481_C_G_72_2	0.0927	-0.523121	1.02391	0.32054	0.659217	-6.3693	UpStream	YDR406W	YDR406W	1	TRUE	+	1	73	1	chrIV	1278481	C	G	TRUE	0	0	-1	1	0	0	0	0.973	3.49426	FALSE	NA	NA	11	836	111	32	FALSE	FALSE	TRUE	729	0.95	TRUE	0.027	0.027	FALSE
chrIV_1302786_G_A_-	YDR417C_chrIV_1302786_G_A_72_2	-0.318178	-1.54568	-4.18868	0.000643602	0.0149029	-0.617438	UpStream	YDR417C	YDR417C	1	TRUE	-	1	73	1	chrIV	1302786	G	A	TRUE	0	1	0	-1	0	0	0	0.984	3.02922	FALSE	NA	NA	NA	NA	NA	NA	FALSE	FALSE	FALSE	860	4.24	TRUE	0.016	0.016	FALSE
chrIV_1317903_G_C_-	YDR422C_5UTR_0_2	0.0726294	-0.719	0.469893	0.641784	0.850946	-6.47037	TSS	YDR422C	YDR422C	1	TRUE	-	1	71	1	chrIV	1317903	G	C	TRUE	0	0	1	-1	0	0	0	0.974	4.79622	FALSE	NA	NA	15	672	129	54	FALSE	FALSE	FALSE	130	NA	FALSE	0.026	0.026	FALSE
chrIV_1318030_A_C_-	YDR422C_chrIV_1318030_A_C_72_2	-0.00751052	0.340483	-0.102484	0.919598	0.974932	-6.70053	UpStream	YDR422C	YDR422C	1	TRUE	-	1	73	1	chrIV	1318030	A	C	TRUE	0	-1	1	0	0	0	0	0.86	4.79622	FALSE	NA	NA	15	672	129	54	FALSE	FALSE	FALSE	257	NA	FALSE	0.14	0.14	FALSE
chrIV_1337078_A_G_+	YDR437W_chrIV_1337078_A_G_72_2	0.460208	-0.62365	2.58871	0.0193574	0.149152	-3.42235	UpStream	YDR437W	YDR437W	1	TRUE	+	1	73	1	chrIV	1337078	A	G	TRUE	0	-1	0	1	0	0	0	0.0009891	3.15024	TRUE	0.0939399	0.0693509	1	2231	1094	515	FALSE	FALSE	FALSE	274	3.15	TRUE	0.0009891	0.0009891	TRUE
chrIV_1342306_G_T_+	YDR440W_5UTR_0_2	0.34886	-0.181584	2.65929	0.0123751	0.103752	-3.04986	TSS	YDR440W	YDR440W	1	TRUE	+	1	45	1	chrIV	1342306	G	T	TRUE	0	0	0	-1	1	0	0	0.992	4.80302	FALSE	0.162758	0.123449	18	920	305	144	FALSE	TRUE	FALSE	187	NA	FALSE	0.008	0.008	FALSE
chrIV_1345379_C_CA_-	YDR441C_chrIV_1345379_C_CA_72_2	-0.61279	1.74506	-3.84096	0.00135562	0.0266185	-0.954418	UpStream	YDR441C	YDR441C	1	TRUE	-	1	73	1	chrIV	1345379	C	CA	FALSE	1	1	0	0	0	0	0	0.988	5.45832	FALSE	0.117415	0.0874007	5	488	181	79	FALSE	TRUE	TRUE	317	NA	FALSE	0.012	NA	NA
chrIV_1345539_T_C_+	YDR442W_chrIV_1345539_T_C_72_2	0.125009	-0.272092	0.972818	0.344582	0.6811	-5.95589	UpStream	YDR442W	YDR442W	1	TRUE	+	1	73	1	chrIV	1345539	T	C	TRUE	0	0	1	0	-1	0	0	0.072	NA	FALSE	NA	NA	NA	NA	NA	NA	FALSE	FALSE	FALSE	108	NA	FALSE	0.072	0.072	TRUE
chrIV_1345539_T_C_-	YDR441C_chrIV_1345539_T_C_72_2	0.242943	-0.348422	3.15682	0.00588088	0.0722024	-2.72596	UpStream	YDR441C	YDR441C	1	TRUE	-	1	73	1	chrIV	1345539	T	C	TRUE	0	0	1	0	-1	0	0	0.072	5.45832	FALSE	0.117415	0.0874007	5	488	181	79	FALSE	TRUE	TRUE	477	NA	FALSE	0.072	0.072	TRUE
chrIV_1345604_C_T_-	YDR441C_chrIV_1345604_C_T_72_2	0.23617	-0.801872	1.60086	0.128229	0.413359	-5.27763	UpStream	YDR441C	YDR441C	1	TRUE	-	1	73	1	chrIV	1345604	C	T	TRUE	0	0	-1	0	1	0	0	0.002967	5.45832	FALSE	0.117415	0.0874007	5	488	181	79	FALSE	TRUE	TRUE	542	NA	FALSE	0.002967	0.002967	TRUE
chrIV_1345604_C_T_+	YDR442W_5UTR_0_12	0.00479719	-1.63283	0.0337372	0.973307	0.992589	-7.19336	TSS	YDR442W	YDR442W	1	TRUE	+	2	116	2	chrIV	1345604	C	T	TRUE	0	0	-1	0	1	0	0	0.002967	NA	FALSE	NA	NA	NA	NA	NA	NA	FALSE	FALSE	FALSE	43	NA	FALSE	0.002967	0.002967	TRUE
chrIV_1345632_T_A_-	YDR441C_chrIV_1345632_T_A_72_2	0.0542778	-0.916527	0.400639	0.693786	0.899487	-6.60734	UpStream	YDR441C	YDR441C	1	TRUE	-	1	73	1	chrIV	1345632	T	A	TRUE	0	1	0	0	-1	0	0	0.992	5.45832	FALSE	0.117415	0.0874007	5	488	181	79	FALSE	TRUE	TRUE	570	1.41	TRUE	0.008	0.008	FALSE
chrIV_1350135_T_C_+	YDR444W_5UTR_0_2	-0.0219317	-0.120045	-0.126494	0.900174	0.963814	-6.27927	TSS	YDR444W	YDR444W	1	TRUE	+	1	75	1	chrIV	1350135	T	C	TRUE	0	0	1	0	-1	0	0	0.646	5.20276	FALSE	0.104109	0.0796328	1	414	84	32	FALSE	FALSE	FALSE	155	2.55	TRUE	0.354	0.354	FALSE
chrIV_1398006_G_A_-	YDR467C_chrIV_1398006_G_A_72_2	-0.223249	-2.02315	-1.65274	0.117135	0.395394	-5.13618	UpStream	YDR467C	YDR467C	1	TRUE	-	1	73	1	chrIV	1398006	G	A	TRUE	0	1	0	-1	0	0	0	0.919	NA	FALSE	NA	NA	NA	486	68	12	FALSE	FALSE	FALSE	97	2.87	TRUE	0.081	0.081	FALSE
chrIV_1398909_C_T_+	YDR469W_5UTR_0_21	-0.20915	-0.737655	-1.27926	0.210483	0.502214	-5.85313	TSS	YDR469W	YDR469W	1	TRUE	+	2	79	1	chrIV	1398909	C	T	TRUE	0	0	-1	0	1	0	0	0.925	6.69525	FALSE	0.348892	0.259315	16	1612	678	310	FALSE	FALSE	FALSE	106	NA	FALSE	0.075	0.075	FALSE
chrIV_1398909_C_T_-	YDR468C_5UTR_0_2	-0.0516823	-0.620902	-0.291732	0.772473	0.909761	-6.11257	TSS	YDR468C	YDR468C	1	TRUE	-	1	30	1	chrIV	1398909	C	T	TRUE	0	0	-1	0	1	0	0	0.925	6.55117	TRUE	0.064329	0.0471669	49	731	470	262	FALSE	FALSE	FALSE	209	NA	FALSE	0.075	0.075	FALSE
chrIV_1398960_CA_C_+	YDR469W_5UTR_0_12	-0.322933	-0.816508	-1.92145	0.064092	0.270585	-4.84093	TSS	YDR469W	YDR469W	1	TRUE	+	2	130	2	chrIV	1398960	CA	C	FALSE	-1	-1	0	0	0	0	0	0.922	6.69525	FALSE	0.348892	0.259315	16	1612	678	310	FALSE	FALSE	FALSE	55	NA	FALSE	0.078	0.078	FALSE
chrIV_1401418_A_C_-	YDR470C_chrIV_1401418_A_C_72_2	-0.0263623	-1.11622	-0.330058	0.745477	0.917273	-6.76743	UpStream	YDR470C	YDR470C	1	TRUE	-	1	73	1	chrIV	1401418	A	C	TRUE	0	-1	1	0	0	0	0	0.034	4.52648	FALSE	NA	NA	11	877	70	29	FALSE	FALSE	FALSE	204	NA	FALSE	0.034	0.034	TRUE
chrIV_1402760_A_G_+	snR13_chrIV_1402760_A_G_72_2	0.129045	1.57949	1.21705	0.240574	0.575548	-5.77741	UpStream	snR13	snR13	1	TRUE	+	1	73	1	chrIV	1402760	A	G	TRUE	0	-1	0	1	0	0	0	0.944	NA	FALSE	NA	NA	5	NA	NA	NA	FALSE	FALSE	FALSE	159	0.43	TRUE	0.056	0.056	FALSE
chrIV_1411151_C_T_-	YDR476C_5UTR_0_211	0.0697749	0.319581	1.08113	0.288139	0.584218	-6.43787	TSS	YDR476C	YDR476C	1	TRUE	-	3	139	1	chrIV	1411151	C	T	TRUE	0	0	-1	0	1	0	0	0.884	6.95479	FALSE	0.102576	0.0774037	7	462	68	24	FALSE	FALSE	FALSE	24	1.61	TRUE	0.116	0.884	TRUE
chrIV_1411239_G_A_-	YDR476C_5UTR_0_121	-0.01108	0.27685	-0.185528	0.854047	0.941458	-6.95724	TSS	YDR476C	YDR476C	1	TRUE	-	3	51	2	chrIV	1411239	G	A	TRUE	0	1	0	-1	0	0	0	0.988	6.95479	FALSE	0.102576	0.0774037	7	462	68	24	FALSE	FALSE	FALSE	112	NA	FALSE	0.012	0.012	FALSE
chrIV_1411263_A_G_-	YDR476C_5UTR_0_112	0.0734179	0.319085	1.24086	0.224148	0.51537	-6.21148	TSS	YDR476C	YDR476C	1	TRUE	-	3	27	3	chrIV	1411263	A	G	TRUE	0	-1	0	1	0	0	0	0.853	6.95479	FALSE	0.102576	0.0774037	7	462	68	24	FALSE	FALSE	FALSE	136	NA	FALSE	0.147	0.853	TRUE
chrIV_1411483_T_C_+	YDR477W_chrIV_1411483_T_C_72_2	0.296244	0.366672	1.19375	0.249325	0.584989	-5.05505	UpStream	YDR477W	YDR477W	1	TRUE	+	1	73	1	chrIV	1411483	T	C	TRUE	0	0	1	0	-1	0	0	0.013	5.99191	FALSE	0.0344528	0.0234045	217	1790	787	357	FALSE	TRUE	FALSE	890	2.68	TRUE	0.013	0.013	TRUE
chrIV_1411563_C_T_+	YDR477W_chrIV_1411563_C_T_72_2	-0.0319209	-0.6571	-0.50742	0.618522	0.859935	-6.70747	UpStream	YDR477W	YDR477W	1	TRUE	+	1	73	1	chrIV	1411563	C	T	TRUE	0	0	-1	0	1	0	0	0.907	5.99191	FALSE	0.0344528	0.0234045	217	1790	787	357	FALSE	TRUE	FALSE	810	2.68	TRUE	0.093	0.093	FALSE
chrIV_1411566_T_C_+	YDR477W_chrIV_1411566_T_C_72_2	0.400021	-0.185699	5.66631	3.0289e-05	0.00163086	2.4443	UpStream	YDR477W	YDR477W	1	TRUE	+	1	73	1	chrIV	1411566	T	C	TRUE	0	0	1	0	-1	0	0	0.66	5.99191	FALSE	0.0344528	0.0234045	217	1790	787	357	FALSE	TRUE	FALSE	807	2.68	TRUE	0.34	0.66	TRUE
chrIV_1411608_T_C_+	YDR477W_chrIV_1411608_T_C_72_2	0.138077	0.248036	2.03075	0.0585837	0.272992	-4.8103	UpStream	YDR477W	YDR477W	1	TRUE	+	1	73	1	chrIV	1411608	T	C	TRUE	0	0	1	0	-1	0	0	0.731	5.99191	FALSE	0.0344528	0.0234045	217	1790	787	357	FALSE	TRUE	FALSE	765	NA	FALSE	0.269	0.269	FALSE
chrIV_1411676_C_T_+	YDR477W_chrIV_1411676_C_T_72_2	-0.183911	-0.770379	-2.08215	0.0531003	0.259517	-4.81782	UpStream	YDR477W	YDR477W	1	TRUE	+	1	73	1	chrIV	1411676	C	T	TRUE	0	0	-1	0	1	0	1	0.481	5.99191	FALSE	0.0344528	0.0234045	217	1790	787	357	FALSE	TRUE	FALSE	697	1.28	TRUE	0.481	0.481	TRUE
chrIV_1411676_C_T_-	YDR476C_chrIV_1411676_C_T_72_2	-0.0195237	-0.198728	-0.182768	0.85719	0.952457	-6.61698	UpStream	YDR476C	YDR476C	1	TRUE	-	1	73	1	chrIV	1411676	C	T	TRUE	0	0	-1	0	1	0	0	0.481	6.95479	FALSE	0.102576	0.0774037	7	462	68	24	FALSE	FALSE	FALSE	549	1.28	TRUE	0.481	0.481	TRUE
chrIV_1411690_A_T_+	YDR477W_chrIV_1411690_A_T_72_2	0.0433334	-0.697532	0.411878	0.685689	0.893614	-6.6793	UpStream	YDR477W	YDR477W	1	TRUE	+	1	73	1	chrIV	1411690	A	T	TRUE	0	-1	0	0	1	0	0	0.711	5.99191	FALSE	0.0344528	0.0234045	217	1790	787	357	FALSE	TRUE	FALSE	683	1.28	TRUE	0.289	0.711	TRUE
chrIV_1411690_A_T_-	YDR476C_chrIV_1411690_A_T_72_2	-0.0519324	-0.559559	-0.558955	0.583641	0.83841	-6.58109	UpStream	YDR476C	YDR476C	1	TRUE	-	1	73	1	chrIV	1411690	A	T	TRUE	0	-1	0	0	1	0	0	0.711	6.95479	FALSE	0.102576	0.0774037	7	462	68	24	FALSE	FALSE	FALSE	563	1.28	TRUE	0.289	0.711	TRUE
chrIV_1411698_T_C_+	YDR477W_chrIV_1411698_T_C_72_2	0.0380261	-0.790243	0.317415	0.754879	0.92073	-6.46211	UpStream	YDR477W	YDR477W	1	TRUE	+	1	73	1	chrIV	1411698	T	C	TRUE	0	0	1	0	-1	0	0	0.482	5.99191	FALSE	0.0344528	0.0234045	217	1790	787	357	FALSE	TRUE	FALSE	675	1.28	TRUE	0.482	0.482	TRUE
chrIV_1411705_C_T_+	YDR477W_chrIV_1411705_C_T_72_2	-0.0303548	-0.876532	-0.338696	0.739077	0.91444	-6.74433	UpStream	YDR477W	YDR477W	1	TRUE	+	1	73	1	chrIV	1411705	C	T	TRUE	0	0	-1	0	1	0	0	0.692	5.99191	FALSE	0.0344528	0.0234045	217	1790	787	357	FALSE	TRUE	FALSE	668	1.28	TRUE	0.308	0.308	FALSE
chrIV_1411706_A_C_+	YDR477W_chrIV_1411706_A_C_72_2	-0.147711	-0.728883	-1.91831	0.0724053	0.301913	-5.0889	UpStream	YDR477W	YDR477W	1	TRUE	+	1	73	1	chrIV	1411706	A	C	TRUE	0	-1	1	0	0	0	0	0.909	5.99191	FALSE	0.0344528	0.0234045	217	1790	787	357	FALSE	TRUE	FALSE	667	1.28	TRUE	0.091	0.091	FALSE
chrIV_1411721_C_T_+	YDR477W_chrIV_1411721_C_T_72_2	-0.0128771	-1.25063	-0.142144	0.888674	0.963235	-6.71841	UpStream	YDR477W	YDR477W	1	TRUE	+	1	73	1	chrIV	1411721	C	T	TRUE	0	0	-1	0	1	0	0	0.683	5.99191	FALSE	0.0344528	0.0234045	217	1790	787	357	FALSE	TRUE	FALSE	652	1.28	TRUE	0.317	0.317	FALSE
chrIV_1411737_C_T_+	YDR477W_chrIV_1411737_C_T_72_2	0.16737	-1.12945	1.28038	0.217982	0.546973	-5.73837	UpStream	YDR477W	YDR477W	1	TRUE	+	1	73	1	chrIV	1411737	C	T	TRUE	0	0	-1	0	1	0	0	0.849	5.99191	FALSE	0.0344528	0.0234045	217	1790	787	357	FALSE	TRUE	FALSE	636	1.28	TRUE	0.151	0.151	FALSE
chrIV_1411853_A_T_+	YDR477W_chrIV_1411853_A_T_72_2	-0.0210365	-1.20882	-0.198035	0.845418	0.950251	-6.75369	UpStream	YDR477W	YDR477W	1	TRUE	+	1	73	1	chrIV	1411853	A	T	TRUE	0	-1	0	0	1	0	0	0.003956	5.99191	FALSE	0.0344528	0.0234045	217	1790	787	357	FALSE	TRUE	FALSE	520	0.57	TRUE	0.003956	0.003956	TRUE
chrIV_1412047_A_G_+	YDR477W_chrIV_1412047_A_G_72_2	0.192593	-1.38812	1.34177	0.197705	0.52065	-5.43239	UpStream	YDR477W	YDR477W	1	TRUE	+	1	73	1	chrIV	1412047	A	G	TRUE	0	-1	0	1	0	0	-1	0.969	5.99191	FALSE	0.0344528	0.0234045	217	1790	787	357	FALSE	TRUE	FALSE	326	3.12	TRUE	0.031	0.031	FALSE
chrIV_1412225_GAAA_GA_+	YDR477W_chrIV_1412225_GAAA_GA_72_2	-0.285235	-0.605517	-1.0802	0.295469	0.629839	-5.46671	UpStream	YDR477W	YDR477W	1	TRUE	+	1	72	1	chrIV	1412225	GAAA	GA	FALSE	-2	-2	0	0	0	0	0	0.077	5.99191	FALSE	0.0344528	0.0234045	217	1790	787	357	FALSE	TRUE	FALSE	148	4.07	TRUE	0.077	NA	NA
chrIV_1416927_A_G_-	YDR479C_5UTR_0_21	-0.166316	-0.635347	-1.79237	0.083029	0.308437	-5.10674	TSS	YDR479C	YDR479C	1	TRUE	-	2	140	1	chrIV	1416927	A	G	TRUE	0	-1	0	1	0	0	0	0.771	4.78263	FALSE	0.0868649	0.0671688	53	1023	170	62	FALSE	FALSE	FALSE	53	1.93	TRUE	0.229	0.229	FALSE
chrIV_1416976_G_A_-	YDR479C_5UTR_0_12	-0.107765	-0.594724	-0.950681	0.349262	0.646348	-6.09092	TSS	YDR479C	YDR479C	1	TRUE	-	2	91	2	chrIV	1416976	G	A	TRUE	0	1	0	-1	0	0	0	0.842	4.78263	FALSE	0.0868649	0.0671688	53	1023	170	62	FALSE	FALSE	FALSE	102	3.93	TRUE	0.158	0.158	FALSE
chrIV_1434754_C_G_+	YDR492W_5UTR_0_2	-0.00198535	-0.229053	-0.0196147	0.984479	0.994915	-6.80374	TSS	YDR492W	YDR492W	1	TRUE	+	1	129	1	chrIV	1434754	C	G	TRUE	0	0	-1	1	0	0	0	0.99	6.77248	FALSE	0.059084	0.0419667	1	805	157	64	FALSE	TRUE	TRUE	170	1.82	TRUE	0.01	0.01	FALSE
chrIV_1445641_T_C_-	YDR497C_5UTR_0_2	-0.3617	1.7385	-4.56109	7.81252e-05	0.00254957	1.35238	TSS	YDR497C	YDR497C	1	TRUE	-	1	46	1	chrIV	1445641	T	C	TRUE	0	0	1	0	-1	0	0	0.533	11.175	FALSE	0.0545168	0.0369013	28	759	121	39	FALSE	TRUE	TRUE	174	2.42	TRUE	0.467	0.533	TRUE
chrIV_1445712_C_T_-	YDR497C_chrIV_1445712_C_T_72_2	-0.156765	2.31007	-1.96158	0.0667736	0.288599	-4.91295	UpStream	YDR497C	YDR497C	1	TRUE	-	1	73	1	chrIV	1445712	C	T	TRUE	0	0	-1	0	1	0	0	0.601	11.175	FALSE	0.0545168	0.0369013	28	759	121	39	FALSE	TRUE	TRUE	245	2.42	TRUE	0.399	0.601	TRUE
chrIV_1445739_T_C_-	YDR497C_chrIV_1445739_T_C_72_2	0.143394	2.39469	1.81812	0.0871042	0.331858	-5.09235	UpStream	YDR497C	YDR497C	1	TRUE	-	1	73	1	chrIV	1445739	T	C	TRUE	0	0	1	0	-1	0	0	0.537	11.175	FALSE	0.0545168	0.0369013	28	759	121	39	FALSE	TRUE	TRUE	272	2.42	TRUE	0.463	0.537	TRUE
chrIV_1447231_G_A_+	YDR499W_chrIV_1447231_G_A_72_2	-0.0667419	-1.2415	-0.632411	0.535717	0.811566	-6.49246	UpStream	YDR499W	YDR499W	1	TRUE	+	1	73	1	chrIV	1447231	G	A	TRUE	0	1	0	-1	0	0	0	0.965	4.97393	TRUE	NA	NA	17	NA	NA	NA	FALSE	FALSE	FALSE	599	6.76	TRUE	0.035	0.035	FALSE
chrIV_1447428_G_C_+	YDR499W_chrIV_1447428_G_C_72_2	0.112052	-1.05333	0.651272	0.523769	0.806075	-6.3556	UpStream	YDR499W	YDR499W	1	TRUE	+	1	73	1	chrIV	1447428	G	C	TRUE	0	0	1	-1	0	0	0	0.692	4.97393	TRUE	NA	NA	17	NA	NA	NA	FALSE	FALSE	FALSE	402	2.33	TRUE	0.308	0.308	FALSE
chrIV_1447474_C_G_-	YDR498C_chrIV_1447474_C_G_72_2	-0.274559	-1.35561	-1.24115	0.231774	0.562879	-5.64332	UpStream	YDR498C	YDR498C	1	TRUE	-	1	73	1	chrIV	1447474	C	G	TRUE	0	0	-1	1	0	0	0	0.523	5.51375	TRUE	0.151966	0.11266	20	1625	843	400	FALSE	FALSE	FALSE	480	2.33	TRUE	0.477	NA	NA
chrIV_1447777_G_A_+	YDR499W_5UTR_0_21	0.00538281	-0.206114	0.121962	0.903731	0.963814	-7.39566	TSS	YDR499W	YDR499W	1	TRUE	+	2	96	1	chrIV	1447777	G	A	TRUE	0	1	0	-1	0	0	1	0.03	4.97393	TRUE	NA	NA	17	NA	NA	NA	FALSE	FALSE	FALSE	53	5.57	TRUE	0.03	0.03	TRUE
chrIV_1447777_G_A_-	YDR498C_chrIV_1447777_G_A_72_2	0.226623	-0.109724	0.683734	0.503559	0.796599	-5.41269	UpStream	YDR498C	YDR498C	1	TRUE	-	1	73	1	chrIV	1447777	G	A	TRUE	0	1	0	-1	0	0	0	0.03	5.51375	TRUE	0.151966	0.11266	20	1625	843	400	FALSE	FALSE	FALSE	783	5.57	TRUE	0.03	0.03	TRUE
chrIV_1447808_C_A_+	YDR499W_5UTR_0_12	0.0831882	-0.167201	1.85472	0.0733572	0.288019	-5.76969	TSS	YDR499W	YDR499W	1	TRUE	+	2	127	2	chrIV	1447808	C	A	TRUE	0	1	-1	0	0	0	0	0.612	4.97393	TRUE	NA	NA	17	NA	NA	NA	FALSE	FALSE	FALSE	22	5.57	TRUE	0.388	0.388	FALSE
chrIV_1450894_C_T_-	YDR500C_5UTR_0_21111	0.0254467	-0.047863	0.490635	0.627207	0.845425	-7.10081	TSS	YDR500C	YDR500C	1	TRUE	-	5	125	1	chrIV	1450894	C	T	TRUE	0	0	-1	0	1	0	0	0.901	10.812	FALSE	NA	NA	13	565	96	21	FALSE	FALSE	TRUE	41	1.97	TRUE	0.099	NA	NA
chrIV_1450897_A_G_-	YDR500C_5UTR_0_12111	-0.0488123	-0.0826051	-0.832017	0.411886	0.698092	-6.9109	TSS	YDR500C	YDR500C	1	TRUE	-	5	122	2	chrIV	1450897	A	G	TRUE	0	-1	0	1	0	0	-1	0.613	10.812	FALSE	NA	NA	13	565	96	21	FALSE	FALSE	TRUE	44	1.97	TRUE	0.387	0.387	FALSE
chrIV_1450897_A_G_+	YDR501W_chrIV_1450897_A_G_72_2	0.0602869	-1.58548	0.553899	0.587019	0.839627	-6.52402	UpStream	YDR501W	YDR501W	1	TRUE	+	1	73	1	chrIV	1450897	A	G	TRUE	0	-1	0	1	0	0	0	0.613	3.06111	FALSE	NA	NA	34	789	67	13	FALSE	FALSE	TRUE	456	1.97	TRUE	0.387	0.387	FALSE
chrIV_1450914_T_C_-	YDR500C_5UTR_0_11211	-0.0412572	-0.0815002	-0.846242	0.404029	0.692182	-6.86592	TSS	YDR500C	YDR500C	1	TRUE	-	5	105	3	chrIV	1450914	T	C	TRUE	0	0	1	0	-1	0	0	0.775	10.812	FALSE	NA	NA	13	565	96	21	FALSE	FALSE	TRUE	61	1.97	TRUE	0.225	0.225	FALSE
chrIV_1450998_G_A_-	YDR500C_5UTR_0_11121	0.0364495	-0.0422399	0.766239	0.449442	0.722488	-6.92125	TSS	YDR500C	YDR500C	1	TRUE	-	5	21	4	chrIV	1450998	G	A	TRUE	0	1	0	-1	0	0	0	0.771	10.812	FALSE	NA	NA	13	565	96	21	FALSE	FALSE	TRUE	145	2.11	TRUE	0.229	0.229	FALSE
chrIV_1451009_A_T_-	YDR500C_5UTR_0_11112	-0.000736942	-0.0598995	-0.0147521	0.988326	0.994915	-7.27856	TSS	YDR500C	YDR500C	1	TRUE	-	5	10	5	chrIV	1451009	A	T	TRUE	0	-1	0	0	1	0	0	0.768	10.812	FALSE	NA	NA	13	565	96	21	FALSE	FALSE	TRUE	156	2.11	TRUE	0.232	0.232	FALSE
chrIV_1451009_A_T_+	YDR501W_chrIV_1451009_A_T_72_2	-0.0282604	1.21377	-0.418329	0.681058	0.89038	-6.67833	UpStream	YDR501W	YDR501W	1	TRUE	+	1	73	1	chrIV	1451009	A	T	TRUE	0	-1	0	0	1	0	0	0.768	3.06111	FALSE	NA	NA	34	789	67	13	FALSE	FALSE	TRUE	344	2.11	TRUE	0.232	0.232	FALSE
chrIV_1459382_G_A_-	YDR505C_chrIV_1459382_G_A_72_2	-0.113946	-2.04548	-1.41957	0.174205	0.484915	-5.81771	UpStream	YDR505C	YDR505C	1	TRUE	-	1	73	1	chrIV	1459382	G	A	TRUE	0	1	0	-1	0	0	0	0.623	5.26527	FALSE	0.114446	0.0829622	21	683	144	62	FALSE	FALSE	TRUE	162	3.11	TRUE	0.377	0.377	FALSE
chrIV_1459584_G_A_-	YDR505C_chrIV_1459584_G_A_72_2	-0.0909017	0.506204	-1.31222	0.207268	0.531735	-5.88606	UpStream	YDR505C	YDR505C	1	TRUE	-	1	73	1	chrIV	1459584	G	A	TRUE	0	1	0	-1	0	0	0	0.794	5.26527	FALSE	0.114446	0.0829622	21	683	144	62	FALSE	FALSE	TRUE	364	NA	FALSE	0.206	0.206	FALSE
chrIV_1459601_C_G_-	YDR505C_chrIV_1459601_C_G_72_2	-0.0304057	0.40221	-0.33364	0.742821	0.916201	-6.58326	UpStream	YDR505C	YDR505C	1	TRUE	-	1	73	1	chrIV	1459601	C	G	TRUE	0	0	-1	1	0	0	0	0.527	5.26527	FALSE	0.114446	0.0829622	21	683	144	62	FALSE	FALSE	TRUE	381	NA	FALSE	0.473	0.527	TRUE
chrIV_1459631_C_CT_-	YDR505C_chrIV_1459631_C_CT_72_2	-0.087021	1.44144	-0.780614	0.445999	0.759262	-6.26227	UpStream	YDR505C	YDR505C	1	TRUE	-	1	73	1	chrIV	1459631	C	CT	FALSE	1	0	0	0	1	0	0	0.61	5.26527	FALSE	0.114446	0.0829622	21	683	144	62	FALSE	FALSE	TRUE	411	NA	FALSE	0.39	0.39	FALSE
chrIV_1459669_C_G_-	YDR505C_chrIV_1459669_C_G_72_2	-0.256887	1.13478	-3.32607	0.00409657	0.0572112	-2.31364	UpStream	YDR505C	YDR505C	1	TRUE	-	1	73	1	chrIV	1459669	C	G	TRUE	0	0	-1	1	0	0	0	0.89	5.26527	FALSE	0.114446	0.0829622	21	683	144	62	FALSE	FALSE	TRUE	449	NA	FALSE	0.11	0.11	FALSE
chrIV_1465952_G_A_-	YDR507C_chrIV_1465952_G_A_72_2	0.828272	-0.888588	5.37271	5.45447e-05	0.0023666	2.05309	UpStream	YDR507C	YDR507C	1	TRUE	-	1	73	1	chrIV	1465952	G	A	TRUE	0	1	0	-1	0	0	0	0.628	5.77373	FALSE	NA	NA	87	597	152	69	FALSE	TRUE	TRUE	166	2.79	TRUE	0.372	0.628	TRUE
chrIV_1466217_T_C_-	YDR507C_chrIV_1466217_T_C_72_2	0.0349706	-1.24692	0.55525	0.586116	0.839609	-6.74782	UpStream	YDR507C	YDR507C	1	TRUE	-	1	73	1	chrIV	1466217	T	C	TRUE	0	0	1	0	-1	0	0	0.81	5.77373	FALSE	NA	NA	87	597	152	69	FALSE	TRUE	TRUE	431	3.48	TRUE	0.19	0.19	FALSE
chrIV_1466338_G_A_-	YDR507C_chrIV_1466338_G_A_72_2	-0.284382	-0.716678	-2.51543	0.0224874	0.158261	-3.72505	UpStream	YDR507C	YDR507C	1	TRUE	-	1	73	1	chrIV	1466338	G	A	TRUE	0	1	0	-1	0	0	0	0.845	5.77373	FALSE	NA	NA	87	597	152	69	FALSE	TRUE	TRUE	552	3.67	TRUE	0.155	0.155	FALSE
chrIV_1466344_A_T_-	YDR507C_chrIV_1466344_A_T_72_2	-0.0912682	-0.678536	-1.22362	0.238151	0.572512	-5.96436	UpStream	YDR507C	YDR507C	1	TRUE	-	1	73	1	chrIV	1466344	A	T	TRUE	0	-1	0	0	1	0	0	0.635	5.77373	FALSE	NA	NA	87	597	152	69	FALSE	TRUE	TRUE	558	3.67	TRUE	0.365	0.635	TRUE
chrIV_1466364_G_A_-	YDR507C_chrIV_1466364_G_A_72_2	0.41519	0.591066	2.78212	0.01297	0.116391	-3.00208	UpStream	YDR507C	YDR507C	1	TRUE	-	1	73	1	chrIV	1466364	G	A	TRUE	0	1	0	-1	0	0	0	0.797	5.77373	FALSE	NA	NA	87	597	152	69	FALSE	TRUE	TRUE	578	3.67	TRUE	0.203	0.203	FALSE
chrIV_1466418_GTTTT_GT_-	YDR507C_chrIV_1466418_GTTTT_GT_72_2	-0.297672	-0.598711	-2.63733	0.0175147	0.13982	-3.61217	UpStream	YDR507C	YDR507C	1	TRUE	-	1	75	1	chrIV	1466418	GTTTT	GT	FALSE	-3	0	0	0	-3	0	0	0.386	5.77373	FALSE	NA	NA	87	597	152	69	FALSE	TRUE	TRUE	632	3.67	TRUE	0.386	NA	NA
chrIV_1467660_T_C_+	YDR509W_chrIV_1467660_T_C_72_2	-0.308651	-0.769035	-1.4219	0.17354	0.483811	-5.22559	UpStream	YDR509W	YDR509W	1	TRUE	+	1	73	1	chrIV	1467660	T	C	TRUE	0	0	1	0	-1	0	0	0.079	NA	FALSE	NA	NA	NA	647	132	34	FALSE	FALSE	FALSE	566	1.72	TRUE	0.079	0.079	TRUE
chrIV_1468017_T_C_+	YDR509W_chrIV_1468017_T_C_72_2	-0.509303	-0.848	-6.21996	1.02982e-05	0.000810903	3.59724	UpStream	YDR509W	YDR509W	1	TRUE	+	1	73	1	chrIV	1468017	T	C	TRUE	0	0	1	0	-1	0	0	0.565	NA	FALSE	NA	NA	NA	647	132	34	FALSE	FALSE	FALSE	209	2.06	TRUE	0.435	0.565	TRUE
chrIV_1468506_CAA_CAAA_-	YDR508C_5UTR_0_21	-0.143209	0.327772	-1.45358	0.156306	0.432047	-5.52252	TSS	YDR508C	YDR508C	1	TRUE	-	2	127	1	chrIV	1468506	CAA	CAAA	FALSE	1	1	0	0	0	0	0	0.368	NA	FALSE	NA	NA	26	986	267	116	FALSE	FALSE	TRUE	62	NA	FALSE	0.368	NA	NA
chrIV_1468562_G_A_-	YDR508C_5UTR_0_12	0.238125	0.519696	2.7532	0.00986271	0.089981	-3.13726	TSS	YDR508C	YDR508C	1	TRUE	-	2	71	2	chrIV	1468562	G	A	TRUE	0	1	0	-1	0	0	0	0.989	NA	FALSE	NA	NA	26	986	267	116	FALSE	FALSE	TRUE	118	NA	FALSE	0.011	0.011	FALSE
chrIV_1468657_CA_C_-	YDR508C_chrIV_1468657_CA_C_72_2	-0.224365	0.605528	-2.2907	0.0353372	0.209168	-4.20348	UpStream	YDR508C	YDR508C	1	TRUE	-	1	74	1	chrIV	1468657	CA	C	FALSE	-1	-1	0	0	0	0	0	0.897	NA	FALSE	NA	NA	26	986	267	116	FALSE	FALSE	TRUE	213	NA	FALSE	0.103	0.103	FALSE
chrIV_1468657_CA_C_+	YDR510W_chrIV_1468657_CA_C_72_2	-0.352508	0.853886	-5.5877	3.54176e-05	0.00179865	2.26359	UpStream	YDR510W	YDR510W	1	TRUE	+	1	72	1	chrIV	1468657	CA	C	FALSE	-1	-1	0	0	0	0	0	0.897	8.71552	TRUE	NA	NA	287	1540	725	345	FALSE	TRUE	FALSE	743	NA	FALSE	0.103	0.103	FALSE
chrIV_1468720_C_A_-	YDR508C_chrIV_1468720_C_A_72_2	-0.066833	0.43564	-0.674381	0.509336	0.798937	-6.3203	UpStream	YDR508C	YDR508C	1	TRUE	-	1	73	1	chrIV	1468720	C	A	TRUE	0	1	-1	0	0	0	0	0.896	NA	FALSE	NA	NA	26	986	267	116	FALSE	FALSE	TRUE	276	NA	FALSE	0.104	0.104	FALSE
chrIV_1468720_C_A_+	YDR510W_chrIV_1468720_C_A_72_2	-0.0466838	0.369857	-0.556903	0.585011	0.838605	-6.6609	UpStream	YDR510W	YDR510W	1	TRUE	+	1	73	1	chrIV	1468720	C	A	TRUE	0	1	-1	0	0	0	0	0.896	8.71552	TRUE	NA	NA	287	1540	725	345	FALSE	TRUE	FALSE	680	NA	FALSE	0.104	0.104	FALSE
chrIV_1468785_G_A_-	YDR508C_chrIV_1468785_G_A_72_2	0.246439	1.33298	4.25868	0.000554367	0.0133197	-0.505426	UpStream	YDR508C	YDR508C	1	TRUE	-	1	73	1	chrIV	1468785	G	A	TRUE	0	1	0	-1	0	0	0	0.455	NA	FALSE	NA	NA	26	986	267	116	FALSE	FALSE	TRUE	341	NA	FALSE	0.455	0.455	TRUE
chrIV_1468785_G_A_+	YDR510W_chrIV_1468785_G_A_72_2	0.418023	0.976301	4.82999	0.000166221	0.00550255	0.886527	UpStream	YDR510W	YDR510W	1	TRUE	+	1	73	1	chrIV	1468785	G	A	TRUE	0	1	0	-1	0	0	0	0.455	8.71552	TRUE	NA	NA	287	1540	725	345	FALSE	TRUE	FALSE	615	NA	FALSE	0.455	0.455	TRUE
chrIV_1468817_C_A_+	YDR510W_chrIV_1468817_C_A_72_2	-0.31866	1.39986	-4.04433	0.000876324	0.0185606	-0.79265	UpStream	YDR510W	YDR510W	1	TRUE	+	1	73	1	chrIV	1468817	C	A	TRUE	0	1	-1	0	0	0	0	0.617	8.71552	TRUE	NA	NA	287	1540	725	345	FALSE	TRUE	FALSE	583	NA	FALSE	0.383	0.617	TRUE
chrIV_1468817_C_A_-	YDR508C_chrIV_1468817_C_A_72_2	-0.26708	1.13514	-2.56744	0.0202205	0.151664	-3.69543	UpStream	YDR508C	YDR508C	1	TRUE	-	1	73	1	chrIV	1468817	C	A	TRUE	0	1	-1	0	0	0	-1	0.617	NA	FALSE	NA	NA	26	986	267	116	FALSE	FALSE	TRUE	373	NA	FALSE	0.383	0.617	TRUE
chrIV_1468883_GT_G_-	YDR508C_chrIV_1468883_GT_G_72_2	0.0406794	2.69795	0.260944	0.79734	0.933534	-6.05165	UpStream	YDR508C	YDR508C	1	TRUE	-	1	74	1	chrIV	1468883	GT	G	FALSE	-1	0	0	0	-1	0	0	0.661	NA	FALSE	NA	NA	26	986	267	116	FALSE	FALSE	TRUE	439	NA	FALSE	0.339	NA	NA
chrIV_1468883_GT_G_+	YDR510W_chrIV_1468883_GT_G_72_2	-0.168581	2.86901	-0.799667	0.435178	0.753218	-5.6972	UpStream	YDR510W	YDR510W	1	TRUE	+	1	72	1	chrIV	1468883	GT	G	FALSE	-1	0	0	0	-1	0	0	0.661	8.71552	TRUE	NA	NA	287	1540	725	345	FALSE	TRUE	FALSE	517	NA	FALSE	0.339	NA	NA
chrIV_1468900_C_T_+	YDR510W_chrIV_1468900_C_T_72_2	-0.582769	2.06642	-0.776665	0.448263	0.761416	-5.08963	UpStream	YDR510W	YDR510W	1	TRUE	+	1	73	1	chrIV	1468900	C	T	TRUE	0	0	-1	0	1	0	0	0.633	8.71552	TRUE	NA	NA	287	1540	725	345	FALSE	TRUE	FALSE	500	NA	FALSE	0.367	0.633	TRUE
chrIV_1468900_C_T_-	YDR508C_chrIV_1468900_C_T_72_2	-0.748342	1.58415	-11.2403	3.46209e-09	2.21029e-06	11.3299	UpStream	YDR508C	YDR508C	1	TRUE	-	1	73	1	chrIV	1468900	C	T	TRUE	0	0	-1	0	1	0	0	0.633	NA	FALSE	NA	NA	26	986	267	116	FALSE	FALSE	TRUE	456	NA	FALSE	0.367	0.633	TRUE
chrIV_1468935_A_G_-	YDR508C_chrIV_1468935_A_G_72_2	0.0682828	2.10867	1.03305	0.31637	0.654119	-6.28018	UpStream	YDR508C	YDR508C	1	TRUE	-	1	73	1	chrIV	1468935	A	G	TRUE	0	-1	0	1	0	0	-1	0.663	NA	FALSE	NA	NA	26	986	267	116	FALSE	FALSE	TRUE	491	NA	FALSE	0.337	0.337	FALSE
chrIV_1468935_A_G_+	YDR510W_chrIV_1468935_A_G_72_2	0.283481	2.25635	2.55947	0.0205534	0.153344	-3.59224	UpStream	YDR510W	YDR510W	1	TRUE	+	1	73	1	chrIV	1468935	A	G	TRUE	0	-1	0	1	0	0	0	0.663	8.71552	TRUE	NA	NA	287	1540	725	345	FALSE	TRUE	FALSE	465	NA	FALSE	0.337	0.337	FALSE
chrIV_1469091_GAAA_GAA_-	YDR508C_chrIV_1469091_GAAA_GAA_72_2	-0.0233912	-0.354176	-0.250016	0.805637	0.935896	-6.87904	UpStream	YDR508C	YDR508C	1	TRUE	-	1	74	1	chrIV	1469091	GAAA	GAA	FALSE	-1	-1	0	0	0	0	0	0.589	NA	FALSE	NA	NA	26	986	267	116	FALSE	FALSE	TRUE	647	NA	FALSE	0.411	NA	NA
chrIV_1469091_GAAA_GAA_+	YDR510W_chrIV_1469091_GAAA_GAA_72_2	-0.00284854	-1.51412	-0.0183188	0.985603	0.994057	-6.55061	UpStream	YDR510W	YDR510W	1	TRUE	+	1	72	1	chrIV	1469091	GAAA	GAA	FALSE	-1	-1	0	0	0	0	0	0.589	8.71552	TRUE	NA	NA	287	1540	725	345	FALSE	TRUE	FALSE	309	NA	FALSE	0.411	NA	NA
chrIV_1469141_T_C_-	YDR508C_chrIV_1469141_T_C_72_2	0.142165	-0.518872	1.57235	0.134699	0.423404	-5.41943	UpStream	YDR508C	YDR508C	1	TRUE	-	1	73	1	chrIV	1469141	T	C	TRUE	0	0	1	0	-1	0	-1	0.61	NA	FALSE	NA	NA	26	986	267	116	FALSE	FALSE	TRUE	697	NA	FALSE	0.39	0.61	TRUE
chrIV_1469161_A_G_-	YDR508C_chrIV_1469161_A_G_72_2	0.223718	-0.419574	0.417151	0.681903	0.890799	-5.61483	UpStream	YDR508C	YDR508C	1	TRUE	-	1	73	1	chrIV	1469161	A	G	TRUE	0	-1	0	1	0	0	0	0.986	NA	FALSE	NA	NA	26	986	267	116	FALSE	FALSE	TRUE	717	NA	FALSE	0.014	0.014	FALSE
chrIV_1469161_A_G_+	YDR510W_chrIV_1469161_A_G_72_2	0.487026	0.661454	1.55648	0.138417	0.431071	-4.65371	UpStream	YDR510W	YDR510W	1	TRUE	+	1	73	1	chrIV	1469161	A	G	TRUE	0	-1	0	1	0	0	0	0.986	8.71552	TRUE	NA	NA	287	1540	725	345	FALSE	TRUE	FALSE	239	NA	FALSE	0.014	0.014	FALSE
chrIV_1469241_G_GA_-	YDR508C_chrIV_1469241_G_GA_72_2	-0.120101	0.630474	-1.59889	0.128668	0.413682	-5.38346	UpStream	YDR508C	YDR508C	1	TRUE	-	1	73	1	chrIV	1469241	G	GA	FALSE	1	1	0	0	0	0	0	0.692	NA	FALSE	NA	NA	26	986	267	116	FALSE	FALSE	TRUE	797	NA	FALSE	0.308	0.308	FALSE
chrIV_1469241_G_GA_+	YDR510W_chrIV_1469241_G_GA_72_2	0.0473914	-0.102728	0.497706	0.625208	0.864146	-6.53764	UpStream	YDR510W	YDR510W	1	TRUE	+	1	73	1	chrIV	1469241	G	GA	FALSE	1	1	0	0	0	0	0	0.692	8.71552	TRUE	NA	NA	287	1540	725	345	FALSE	TRUE	FALSE	159	NA	FALSE	0.308	0.308	FALSE
chrIV_1469246_G_A_+	YDR510W_chrIV_1469246_G_A_72_2	0.177552	0.353886	2.40091	0.0283553	0.183121	-4.08931	UpStream	YDR510W	YDR510W	1	TRUE	+	1	73	1	chrIV	1469246	G	A	TRUE	0	1	0	-1	0	0	0	0.636	8.71552	TRUE	NA	NA	287	1540	725	345	FALSE	TRUE	FALSE	154	NA	FALSE	0.364	0.636	TRUE
chrIV_1469246_G_A_-	YDR508C_chrIV_1469246_G_A_72_2	0.0309123	0.557455	0.309416	0.760848	0.922329	-6.56476	UpStream	YDR508C	YDR508C	1	TRUE	-	1	73	1	chrIV	1469246	G	A	TRUE	0	1	0	-1	0	0	0	0.636	NA	FALSE	NA	NA	26	986	267	116	FALSE	FALSE	TRUE	802	NA	FALSE	0.364	0.636	TRUE
chrIV_1469271_A_G_+	YDR510W_chrIV_1469271_A_G_72_2	-0.135794	0.358406	-0.706086	0.489909	0.790346	-5.87066	UpStream	YDR510W	YDR510W	1	TRUE	+	1	73	1	chrIV	1469271	A	G	TRUE	0	-1	0	1	0	0	0	0.64	8.71552	TRUE	NA	NA	287	1540	725	345	FALSE	TRUE	FALSE	129	NA	FALSE	0.36	0.64	TRUE
chrIV_1469271_A_G_-	YDR508C_chrIV_1469271_A_G_72_2	0.0363752	0.323676	0.488996	0.63123	0.867274	-6.56662	UpStream	YDR508C	YDR508C	1	TRUE	-	1	73	1	chrIV	1469271	A	G	TRUE	0	-1	0	1	0	0	0	0.64	NA	FALSE	NA	NA	26	986	267	116	FALSE	FALSE	TRUE	827	NA	FALSE	0.36	0.64	TRUE
chrIV_1469289_T_A_-	YDR508C_chrIV_1469289_T_A_72_2	-0.238989	-0.326411	-2.20978	0.04145	0.227289	-4.34282	UpStream	YDR508C	YDR508C	1	TRUE	-	1	73	1	chrIV	1469289	T	A	TRUE	0	1	0	0	-1	0	0	0.638	NA	FALSE	NA	NA	26	986	267	116	FALSE	FALSE	TRUE	845	2.17	TRUE	0.362	0.638	TRUE
chrIV_1469289_T_A_+	YDR510W_chrIV_1469289_T_A_72_2	0.0228101	-0.781449	0.253384	0.803077	0.935597	-6.80448	UpStream	YDR510W	YDR510W	1	TRUE	+	1	73	1	chrIV	1469289	T	A	TRUE	0	1	0	0	-1	0	0	0.638	8.71552	TRUE	NA	NA	287	1540	725	345	FALSE	TRUE	FALSE	111	2.17	TRUE	0.362	0.638	TRUE
chrIV_1469311_T_A_-	YDR508C_chrIV_1469311_T_A_72_2	-0.11168	-0.885025	-0.910853	0.375386	0.707859	-6.16513	UpStream	YDR508C	YDR508C	1	TRUE	-	1	73	1	chrIV	1469311	T	A	TRUE	0	1	0	0	-1	0	0	0.701	NA	FALSE	NA	NA	26	986	267	116	FALSE	FALSE	TRUE	867	2.17	TRUE	0.299	0.299	FALSE
chrIV_1469311_T_A_+	YDR510W_chrIV_1469311_T_A_72_2	0.0980411	-0.745856	0.950827	0.355307	0.688581	-6.37049	UpStream	YDR510W	YDR510W	1	TRUE	+	1	73	1	chrIV	1469311	T	A	TRUE	0	1	0	0	-1	0	0	0.701	8.71552	TRUE	NA	NA	287	1540	725	345	FALSE	TRUE	FALSE	89	2.17	TRUE	0.299	0.299	FALSE
chrIV_1469888_C_T_+	YDR511W_chrIV_1469888_C_T_72_2	-0.247351	-0.0845142	-2.38642	0.0291934	0.185584	-4.02139	UpStream	YDR511W	YDR511W	1	TRUE	+	1	73	1	chrIV	1469888	C	T	TRUE	0	0	-1	0	1	0	0	0.924	5.48777	FALSE	0.0980921	0.074836	6	486	72	19	FALSE	FALSE	FALSE	129	NA	FALSE	0.076	0.076	FALSE
chrIV_1473079_C_A_-	YDR514C_chrIV_1473079_C_A_72_2	0.0122043	-1.58498	0.122274	0.904148	0.968745	-6.70074	UpStream	YDR514C	YDR514C	1	TRUE	-	1	73	1	chrIV	1473079	C	A	TRUE	0	1	-1	0	0	0	0	0.713	5.99475	FALSE	0.114897	0.0893102	5	604	134	46	FALSE	FALSE	TRUE	80	3.68	TRUE	0.287	0.713	TRUE
chrIV_1473079_C_A_+	YDR515W_chrIV_1473079_C_A_72_2	-0.199309	-0.549011	-2.76721	0.0133796	0.119111	-3.46183	UpStream	YDR515W	YDR515W	1	TRUE	+	1	73	1	chrIV	1473079	C	A	TRUE	0	1	-1	0	0	0	0	0.713	5.56286	FALSE	0.253434	0.195312	528	680	90	24	FALSE	FALSE	TRUE	350	3.68	TRUE	0.287	0.713	TRUE
chrIV_1473233_C_T_-	YDR514C_chrIV_1473233_C_T_72_2	0.201411	-0.430828	1.67341	0.11295	0.386957	-5.28852	UpStream	YDR514C	YDR514C	1	TRUE	-	1	73	1	chrIV	1473233	C	T	TRUE	0	0	-1	0	1	0	0	0.712	5.99475	FALSE	0.114897	0.0893102	5	604	134	46	FALSE	FALSE	TRUE	234	5.49	TRUE	0.288	0.712	TRUE
chrIV_1473269_A_G_-	YDR514C_chrIV_1473269_A_G_72_2	-0.0248598	-1.04854	-0.255487	0.80148	0.935219	-6.61658	UpStream	YDR514C	YDR514C	1	TRUE	-	1	73	1	chrIV	1473269	A	G	TRUE	0	-1	0	1	0	0	0	0.759	5.99475	FALSE	0.114897	0.0893102	5	604	134	46	FALSE	FALSE	TRUE	270	5.49	TRUE	0.241	0.241	FALSE
chrIV_1473316_A_G_+	YDR515W_chrIV_1473316_A_G_72_2	-0.0923427	-0.955021	-1.08388	0.293883	0.629528	-6.12605	UpStream	YDR515W	YDR515W	1	TRUE	+	1	73	1	chrIV	1473316	A	G	TRUE	0	-1	0	1	0	0	0	0.637	5.56286	FALSE	0.253434	0.195312	528	680	90	24	FALSE	FALSE	TRUE	113	5.49	TRUE	0.363	0.637	TRUE
chrIV_1473316_A_G_-	YDR514C_chrIV_1473316_A_G_72_2	0.0561003	-1.13544	0.257742	0.799768	0.935156	-6.29664	UpStream	YDR514C	YDR514C	1	TRUE	-	1	73	1	chrIV	1473316	A	G	TRUE	0	-1	0	1	0	0	0	0.637	5.99475	FALSE	0.114897	0.0893102	5	604	134	46	FALSE	FALSE	TRUE	317	5.49	TRUE	0.363	0.637	TRUE
chrIV_1476572_A_G_+	YDR517W_chrIV_1476572_A_G_72_2	-0.0422701	-1.13172	-0.581091	0.568972	0.830941	-6.5855	UpStream	YDR517W	YDR517W	1	TRUE	+	1	73	1	chrIV	1476572	A	G	TRUE	0	-1	0	1	0	0	0	0.629	6.71898	FALSE	0.102947	0.07733	17	761	160	57	FALSE	TRUE	FALSE	667	NA	FALSE	0.371	0.371	FALSE
chrIV_1476572_A_G_-	YDR516C_chrIV_1476572_A_G_72_2	0.131775	-1.75744	1.08357	0.294013	0.629528	-6.00346	UpStream	YDR516C	YDR516C	1	TRUE	-	1	73	1	chrIV	1476572	A	G	TRUE	0	-1	0	1	0	0	0	0.629	6.02379	FALSE	0.0174657	0.011675	18	471	83	25	FALSE	FALSE	TRUE	96	NA	FALSE	0.371	0.371	FALSE
chrIV_1476639_TTC_T_-	YDR516C_5UTR_0_12	0.102561	0.243207	1.80019	0.0817598	0.305969	-5.50157	TSS	YDR516C	YDR516C	1	TRUE	-	2	34	2	chrIV	1476639	TTC	T	FALSE	-2	0	-1	0	-1	0	0	0.572	6.02379	FALSE	0.0174657	0.011675	18	471	83	25	FALSE	FALSE	TRUE	163	NA	FALSE	0.428	0.572	TRUE
chrIV_1485402_C_CA_-	YDR522C_chrIV_1485402_C_CA_72_2	0.04864	-1.19094	0.593151	0.561061	0.828238	-6.48166	UpStream	YDR522C	YDR522C	1	TRUE	-	1	73	1	chrIV	1485402	C	CA	FALSE	1	1	0	0	0	0	0	0.392	NA	FALSE	NA	NA	1	819	217	95	FALSE	FALSE	TRUE	99	NA	FALSE	0.392	NA	NA
chrIV_1487491_A_G_-	YDR523C_chrIV_1487491_A_G_72_2	-0.490947	-0.556285	-6.00179	1.56773e-05	0.000999094	3.18082	UpStream	YDR523C	YDR523C	1	TRUE	-	1	73	1	chrIV	1487491	A	G	TRUE	0	-1	0	1	0	0	0	0.778	NA	FALSE	NA	NA	60	414	60	20	FALSE	TRUE	FALSE	453	NA	FALSE	0.222	0.222	FALSE
chrIV_1489122_T_C_-	YDR524C_5UTR_0_2	-0.546299	-0.225719	-10.7825	6.52164e-12	2.39879e-09	17.1958	TSS	YDR524C	YDR524C	1	TRUE	-	1	80	1	chrIV	1489122	T	C	TRUE	0	0	1	0	-1	0	0	0.865	5.14123	FALSE	0.306055	0.235264	2	912	148	49	FALSE	FALSE	FALSE	132	NA	FALSE	0.135	0.135	FALSE
chrIV_1490594_C_T_-	YDR524C-A_chrIV_1490594_C_T_72_2	-0.0592438	-0.633716	-0.614235	0.547372	0.819324	-6.60893	UpStream	YDR524C-A	YDR524C-A	1	TRUE	-	1	73	1	chrIV	1490594	C	T	TRUE	0	0	-1	0	1	0	1	0.636	NA	FALSE	NA	NA	NA	NA	NA	NA	FALSE	FALSE	FALSE	604	5.23	TRUE	0.364	0.636	TRUE
chrIV_1493509_T_A_-	snR84_chrIV_1493509_T_A_72_2	-0.0845771	-0.203353	-0.916531	0.372488	0.705144	-6.26127	UpStream	snR84	snR84	1	TRUE	-	1	73	1	chrIV	1493509	T	A	TRUE	0	1	0	0	-1	0	0	0.643	NA	FALSE	NA	NA	6	NA	NA	NA	FALSE	FALSE	FALSE	483	3.36	TRUE	0.357	0.643	TRUE
chrIV_1493685_C_A_+	YDR528W_chrIV_1493685_C_A_72_2	-0.0718919	-1.89468	-0.526005	0.605829	0.854443	-6.43998	UpStream	YDR528W	YDR528W	1	TRUE	+	1	73	1	chrIV	1493685	C	A	TRUE	0	1	-1	0	0	0	0	0.654	5.82005	FALSE	0.162343	0.117129	7	387	73	20	FALSE	FALSE	TRUE	901	1.38	TRUE	0.346	0.654	TRUE
chrIV_1493732_T_G_+	YDR528W_chrIV_1493732_T_G_72_2	0.324529	-1.61954	2.82967	0.0117428	0.110018	-3.35857	UpStream	YDR528W	YDR528W	1	TRUE	+	1	73	1	chrIV	1493732	T	G	TRUE	0	0	0	1	-1	0	0	0.88	5.82005	FALSE	0.162343	0.117129	7	387	73	20	FALSE	FALSE	TRUE	854	1.12	TRUE	0.12	0.12	FALSE
chrIV_1493831_G_A_+	YDR528W_chrIV_1493831_G_A_72_2	0.00126489	-1.1299	0.0124111	0.990245	0.996472	-6.77135	UpStream	YDR528W	YDR528W	1	TRUE	+	1	73	1	chrIV	1493831	G	A	TRUE	0	1	0	-1	0	0	0	0.781	5.82005	FALSE	0.162343	0.117129	7	387	73	20	FALSE	FALSE	TRUE	755	1.12	TRUE	0.219	0.219	FALSE
chrIV_1496691_C_A_-	YDR529C_chrIV_1496691_C_A_72_2	-0.179782	0.000628754	-1.91611	0.0727024	0.301913	-5.07316	UpStream	YDR529C	YDR529C	1	TRUE	-	1	73	1	chrIV	1496691	C	A	TRUE	0	1	-1	0	0	0	0	0.504	9.15139	FALSE	0.0440438	0.02847	20	595	188	76	FALSE	TRUE	FALSE	143	NA	FALSE	0.496	0.504	TRUE
chrIV_1498087_C_G_+	YDR531W_chrIV_1498087_C_G_72_2	0.357551	-0.450707	2.10361	0.0509525	0.256716	-4.2783	UpStream	YDR531W	YDR531W	1	TRUE	+	1	73	1	chrIV	1498087	C	G	TRUE	0	0	-1	1	0	0	0	0.987	6.72094	TRUE	0.0598366	0.0399257	4	1354	491	190	FALSE	TRUE	FALSE	145	4.81	TRUE	0.013	0.013	FALSE
chrIV_1500757_A_G_-	YDR532C_chrIV_1500757_A_G_72_2	0.0754103	-1.06986	0.846958	0.409042	0.737397	-6.40904	UpStream	YDR532C	YDR532C	1	TRUE	-	1	73	1	chrIV	1500757	A	G	TRUE	0	-1	0	1	0	0	0	0.737	5.13301	FALSE	0.140024	0.109782	12	NA	NA	NA	FALSE	FALSE	FALSE	204	1.61	TRUE	0.263	0.263	FALSE
chrIV_1502303_C_G_-	YDR533C_5UTR_0_2	0.175409	-0.260234	1.70742	0.0979362	0.341274	-5.14406	TSS	YDR533C	YDR533C	1	TRUE	-	1	30	1	chrIV	1502303	C	G	TRUE	0	0	-1	1	0	0	0	0.58	8.44182	FALSE	NA	NA	11	660	160	53	FALSE	FALSE	FALSE	143	3.27	TRUE	0.42	0.58	TRUE
chrIV_1502377_G_A_-	YDR533C_chrIV_1502377_G_A_72_2	-0.21952	0.0278293	-2.80544	0.0123536	0.11244	-3.39811	UpStream	YDR533C	YDR533C	1	TRUE	-	1	73	1	chrIV	1502377	G	A	TRUE	0	1	0	-1	0	0	0	0.966	8.44182	FALSE	NA	NA	11	660	160	53	FALSE	FALSE	FALSE	217	NA	FALSE	0.034	0.034	FALSE
chrIV_1502494_T_C_-	YDR533C_chrIV_1502494_T_C_72_2	-0.159647	1.58954	-1.94065	0.0694462	0.296958	-5.12109	UpStream	YDR533C	YDR533C	1	TRUE	-	1	73	1	chrIV	1502494	T	C	TRUE	0	0	1	0	-1	0	0	0.666	8.44182	FALSE	NA	NA	11	660	160	53	FALSE	FALSE	FALSE	334	1.79	TRUE	0.334	0.666	TRUE
chrIV_1502550_A_G_-	YDR533C_chrIV_1502550_A_G_72_2	0.453984	3.23933	4.11965	0.00074588	0.0162446	-0.389377	UpStream	YDR533C	YDR533C	1	TRUE	-	1	73	1	chrIV	1502550	A	G	TRUE	0	-1	0	1	0	0	0	0.723	8.44182	FALSE	NA	NA	11	660	160	53	FALSE	FALSE	FALSE	390	2.45	TRUE	0.277	0.723	TRUE
chrIV_1502666_T_C_-	YDR533C_chrIV_1502666_T_C_72_2	-0.705872	-0.396643	-8.1152	3.50742e-07	8.70816e-05	6.89388	UpStream	YDR533C	YDR533C	1	TRUE	-	1	73	1	chrIV	1502666	T	C	TRUE	0	0	1	0	-1	0	0	0.975	8.44182	FALSE	NA	NA	11	660	160	53	FALSE	FALSE	FALSE	506	2.45	TRUE	0.025	NA	NA
chrIV_1502742_T_A_-	YDR533C_chrIV_1502742_T_A_72_2	0.0350023	-1.57764	0.214495	0.832769	0.946261	-6.39621	UpStream	YDR533C	YDR533C	1	TRUE	-	1	73	1	chrIV	1502742	T	A	TRUE	0	1	0	0	-1	0	0	0.606	8.44182	FALSE	NA	NA	11	660	160	53	FALSE	FALSE	FALSE	582	NA	FALSE	0.394	NA	NA
chrIV_1502817_C_T_-	YDR533C_chrIV_1502817_C_T_72_2	0.161188	-1.4034	1.04083	0.312849	0.650591	-5.82153	UpStream	YDR533C	YDR533C	1	TRUE	-	1	73	1	chrIV	1502817	C	T	TRUE	0	0	-1	0	1	0	0	0.658	8.44182	FALSE	NA	NA	11	660	160	53	FALSE	FALSE	FALSE	657	NA	FALSE	0.342	0.658	TRUE
chrIV_1502831_T_G_-	YDR533C_chrIV_1502831_T_G_72_2	0.240551	-1.01306	2.03838	0.057739	0.270724	-4.62469	UpStream	YDR533C	YDR533C	1	TRUE	-	1	73	1	chrIV	1502831	T	G	TRUE	0	0	0	1	-1	0	0	0.661	8.44182	FALSE	NA	NA	11	660	160	53	FALSE	FALSE	FALSE	671	2.6	TRUE	0.339	0.661	TRUE
chrIV_1502849_C_T_-	YDR533C_chrIV_1502849_C_T_72_2	0.145297	-0.966251	1.54921	0.14015	0.434318	-5.5793	UpStream	YDR533C	YDR533C	1	TRUE	-	1	73	1	chrIV	1502849	C	T	TRUE	0	0	-1	0	1	0	0	0.662	8.44182	FALSE	NA	NA	11	660	160	53	FALSE	FALSE	FALSE	689	2.6	TRUE	0.338	0.662	TRUE
chrIV_1502887_AC_A_-	YDR533C_chrIV_1502887_AC_A_72_2	0.110538	-0.610684	1.10843	0.28345	0.618827	-6.13238	UpStream	YDR533C	YDR533C	1	TRUE	-	1	74	1	chrIV	1502887	AC	A	FALSE	-1	0	-1	0	0	0	0	0.564	8.44182	FALSE	NA	NA	11	660	160	53	FALSE	FALSE	FALSE	727	2.6	TRUE	0.436	NA	NA
chrIV_1502908_C_A_-	YDR533C_chrIV_1502908_C_A_72_2	-0.0538859	-0.770925	-0.535753	0.599222	0.848518	-6.66695	UpStream	YDR533C	YDR533C	1	TRUE	-	1	73	1	chrIV	1502908	C	A	TRUE	0	1	-1	0	0	0	0	0.398	8.44182	FALSE	NA	NA	11	660	160	53	FALSE	FALSE	FALSE	748	2.6	TRUE	0.398	NA	NA
chrIV_1502990_TTC_T_-	YDR533C_chrIV_1502990_TTC_T_72_2	-0.0577175	-0.899341	-0.43217	0.671169	0.884568	-6.46476	UpStream	YDR533C	YDR533C	1	TRUE	-	1	74	1	chrIV	1502990	TTC	T	FALSE	-2	0	-1	0	-1	0	0	0.618	8.44182	FALSE	NA	NA	11	660	160	53	FALSE	FALSE	FALSE	830	NA	FALSE	0.382	0.618	TRUE
chrIV_1503023_T_C_-	YDR533C_chrIV_1503023_T_C_72_2	0.107479	-1.69139	0.266904	0.792825	0.932158	-5.56397	UpStream	YDR533C	YDR533C	1	TRUE	-	1	73	1	chrIV	1503023	T	C	TRUE	0	0	1	0	-1	0	0	0.577	8.44182	FALSE	NA	NA	11	660	160	53	FALSE	FALSE	FALSE	863	NA	FALSE	0.423	0.577	TRUE
chrIV_1504938_G_A_-	YDR534C_5UTR_0_2111	0.346299	-0.315562	3.08107	0.00435376	0.052228	-2.48748	TSS	YDR534C	YDR534C	1	TRUE	-	4	129	1	chrIV	1504938	G	A	TRUE	0	1	0	-1	0	0	0	0.654	2.65059	FALSE	NA	NA	1	818	138	56	FALSE	FALSE	FALSE	38	4.03	TRUE	0.346	0.654	TRUE
chrIV_1504947_A_G_-	YDR534C_5UTR_0_1211	-0.203025	-0.594238	-2.18105	0.037043	0.202568	-4.41353	TSS	YDR534C	YDR534C	1	TRUE	-	4	120	2	chrIV	1504947	A	G	TRUE	0	-1	0	1	0	0	0	0.653	2.65059	FALSE	NA	NA	1	818	138	56	FALSE	FALSE	FALSE	47	4.03	TRUE	0.347	0.653	TRUE
chrIV_1504951_C_G_-	YDR534C_5UTR_0_1121	0.0787905	-0.462279	0.893206	0.378762	0.670185	-6.28079	TSS	YDR534C	YDR534C	1	TRUE	-	4	116	3	chrIV	1504951	C	G	TRUE	0	0	-1	1	0	0	0	0.961	2.65059	FALSE	NA	NA	1	818	138	56	FALSE	FALSE	FALSE	51	4.03	TRUE	0.039	0.039	FALSE
chrIV_1504971_C_A_-	YDR534C_5UTR_0_1112	0.315875	-0.337682	3.00306	0.00530669	0.0587803	-2.70189	TSS	YDR534C	YDR534C	1	TRUE	-	4	96	4	chrIV	1504971	C	A	TRUE	0	1	-1	0	0	0	-1	0.657	2.65059	FALSE	NA	NA	1	818	138	56	FALSE	FALSE	FALSE	71	3.02	TRUE	0.343	0.657	TRUE
chrIV_1505853_AT_A_-	YDR534C_chrIV_1505853_AT_A_72_2	0.347453	-0.872173	2.18295	0.0436832	0.233796	-4.31148	UpStream	YDR534C	YDR534C	1	TRUE	-	1	74	1	chrIV	1505853	AT	A	FALSE	-1	0	0	0	-1	0	0	0.758	2.65059	FALSE	NA	NA	1	818	138	56	FALSE	FALSE	FALSE	953	1.69	TRUE	0.242	NA	NA
chrIV_1507606_T_C_-	YDR535C_chrIV_1507606_T_C_72_2	0.129718	0.272709	1.57939	0.133076	0.420889	-5.52465	UpStream	YDR535C	YDR535C	1	TRUE	-	1	73	1	chrIV	1507606	T	C	TRUE	0	0	1	0	-1	0	0	0.349	NA	FALSE	NA	NA	NA	372	93	40	FALSE	FALSE	FALSE	244	NA	FALSE	0.349	0.349	TRUE
chrIV_1507780_G_A_-	YDR535C_chrIV_1507780_G_A_72_2	-0.0599046	-0.750612	-0.618223	0.544803	0.818119	-6.52487	UpStream	YDR535C	YDR535C	1	TRUE	-	1	73	1	chrIV	1507780	G	A	TRUE	0	1	0	-1	0	0	0	0.747	NA	FALSE	NA	NA	NA	372	93	40	FALSE	FALSE	FALSE	418	0.65	TRUE	0.253	0.253	FALSE
chrIV_1507893_G_T_+	YDR536W_5UTR_0_2	-0.278226	0.710093	-3.38788	0.00196359	0.0304056	-1.9615	TSS	YDR536W	YDR536W	1	TRUE	+	1	61	1	chrIV	1507893	G	T	TRUE	0	0	0	-1	1	0	0	0.181	NA	FALSE	NA	NA	NA	820	158	55	FALSE	FALSE	FALSE	112	1.35	TRUE	0.181	0.181	TRUE
chrIV_1507981_A_G_-	YDR535C_chrIV_1507981_A_G_72_2	0.0986243	-0.677063	0.902829	0.379507	0.710821	-6.08351	UpStream	YDR535C	YDR535C	1	TRUE	-	1	73	1	chrIV	1507981	A	G	TRUE	0	-1	0	1	0	0	0	0.627	NA	FALSE	NA	NA	NA	372	93	40	FALSE	FALSE	FALSE	619	1.35	TRUE	0.373	0.627	TRUE
chrIV_1510422_G_A_+	YDR538W_chrIV_1510422_G_A_72_2	0.16463	-0.733686	1.50954	0.149925	0.448781	-5.56969	UpStream	YDR538W	YDR538W	1	TRUE	+	1	73	1	chrIV	1510422	G	A	TRUE	0	1	0	-1	0	0	0	0.593	4.78274	FALSE	0.107622	0.079071	4	850	183	67	FALSE	FALSE	FALSE	480	1.43	TRUE	0.407	0.407	FALSE
chrIV_1517833_A_G_-	YDR540C_5UTR_0_211	-0.00701443	-0.570426	-0.0346433	0.972591	0.992589	-5.91898	TSS	YDR540C	YDR540C	1	TRUE	-	3	109	1	chrIV	1517833	A	G	TRUE	0	-1	0	1	0	0	0	0.691	3.94162	FALSE	NA	NA	3	781	217	78	FALSE	FALSE	FALSE	158	4.93	TRUE	0.309	0.309	FALSE
chrIV_1517858_G_GA_-	YDR540C_5UTR_0_121	-0.153244	-0.606556	-0.469396	0.642135	0.850976	-5.73917	TSS	YDR540C	YDR540C	1	TRUE	-	3	84	2	chrIV	1517858	G	GA	FALSE	1	1	0	0	0	0	0	0.864	3.94162	FALSE	NA	NA	3	781	217	78	FALSE	FALSE	FALSE	183	4.93	TRUE	0.136	0.864	TRUE
chrIV_1517934_CG_AG_-	YDR540C_5UTR_0_112	-0.0277082	-0.568853	-0.122534	0.903283	0.963814	-5.83581	TSS	YDR540C	YDR540C	1	TRUE	-	3	8	3	chrIV	1517934	CG	AG	FALSE	0	1	-1	0	0	0	0	0.599	3.94162	FALSE	NA	NA	3	781	217	78	FALSE	FALSE	FALSE	259	4.93	TRUE	0.401	0.599	TRUE
chrIV_1518334_C_A_-	YDR540C_chrIV_1518334_C_A_72_2	-0.323152	-0.907934	-2.15455	0.0461684	0.243597	-4.37152	UpStream	YDR540C	YDR540C	1	TRUE	-	1	73	1	chrIV	1518334	C	A	TRUE	0	1	-1	0	0	0	0	0.861	3.94162	FALSE	NA	NA	3	781	217	78	FALSE	FALSE	FALSE	659	NA	FALSE	0.139	0.139	FALSE
chrIV_1520921_A_G_-	YDR541C_5UTR_0_21	0.0742935	-0.697235	1.68086	0.103036	0.349807	-5.99961	TSS	YDR541C	YDR541C	1	TRUE	-	2	105	1	chrIV	1520921	A	G	TRUE	0	-1	0	1	0	0	0	0.735	5.29962	FALSE	NA	NA	5	777	203	69	FALSE	FALSE	FALSE	223	2.44	TRUE	0.265	0.265	FALSE
chrIV_1521015_T_C_-	YDR541C_chrIV_1521015_T_C_72_2	-0.139169	-0.747821	-1.8377	0.0840401	0.325173	-5.16509	UpStream	YDR541C	YDR541C	1	TRUE	-	1	73	1	chrIV	1521015	T	C	TRUE	0	0	1	0	-1	0	0	0.697	5.29962	FALSE	NA	NA	5	777	203	69	FALSE	FALSE	FALSE	317	1.7	TRUE	0.303	0.303	FALSE
chrIV_1521561_TA_T_-	YDR541C_chrIV_1521561_TA_T_72_2	0.121581	-1.06798	0.854104	0.405182	0.73399	-6.30773	UpStream	YDR541C	YDR541C	1	TRUE	-	1	74	1	chrIV	1521561	TA	T	FALSE	-1	-1	0	0	0	0	0	0.846	5.29962	FALSE	NA	NA	5	777	203	69	FALSE	FALSE	FALSE	863	2.56	TRUE	0.154	0.154	FALSE
chrIX_32673_AG_A_-	YIL166C_chrIX_32673_AG_A_72_2	0.0436036	-2.59566	0.311851	0.759029	0.922026	-6.54274	UpStream	YIL166C	YIL166C	1	TRUE	-	1	74	1	chrIX	32673	AG	A	FALSE	-1	0	0	-1	0	0	0	0.572	2.56427	FALSE	NA	NA	3	282	77	21	FALSE	FALSE	FALSE	107	2.14	TRUE	0.428	0.572	TRUE
chrIX_32689_G_A_-	YIL166C_chrIX_32689_G_A_72_2	-0.0276964	-0.805164	-0.214924	0.83244	0.946128	-6.69833	UpStream	YIL166C	YIL166C	1	TRUE	-	1	73	1	chrIX	32689	G	A	TRUE	0	1	0	-1	0	0	0	0.561	2.56427	FALSE	NA	NA	3	282	77	21	FALSE	FALSE	FALSE	123	NA	FALSE	0.439	0.561	TRUE
chrIX_32732_T_C_-	YIL166C_chrIX_32732_T_C_72_2	0.221521	-0.616666	1.65939	0.115774	0.393155	-5.36459	UpStream	YIL166C	YIL166C	1	TRUE	-	1	73	1	chrIX	32732	T	C	TRUE	0	0	1	0	-1	0	0	0.005081	2.56427	FALSE	NA	NA	3	282	77	21	FALSE	FALSE	FALSE	166	5.88	TRUE	0.005081	0.005081	TRUE
chrIX_33008_C_T_-	YIL166C_5UTR_0_2111	-0.0620037	-1.78476	-0.393164	0.696942	0.879322	-6.93916	TSS	YIL166C	YIL166C	1	TRUE	-	4	119	1	chrIX	33008	C	T	TRUE	0	0	-1	0	1	0	0	0.55	2.56427	FALSE	NA	NA	3	282	77	21	FALSE	FALSE	FALSE	442	NA	FALSE	0.45	0.55	TRUE
chrIX_33018_C_G_-	YIL166C_5UTR_0_1211	0.0989206	-1.70264	0.76382	0.450861	0.722815	-6.72599	TSS	YIL166C	YIL166C	1	TRUE	-	4	109	2	chrIX	33018	C	G	TRUE	0	0	-1	1	0	0	0	0.588	2.56427	FALSE	NA	NA	3	282	77	21	FALSE	FALSE	FALSE	452	NA	FALSE	0.412	0.412	FALSE
chrIX_33032_G_A_-	YIL166C_5UTR_0_1121	0.0856452	-1.70993	0.616608	0.542083	0.787273	-6.71427	TSS	YIL166C	YIL166C	1	TRUE	-	4	95	3	chrIX	33032	G	A	TRUE	0	1	0	-1	0	0	0	0.611	2.56427	FALSE	NA	NA	3	282	77	21	FALSE	FALSE	FALSE	466	NA	FALSE	0.389	0.611	TRUE
chrIX_33054_G_GAA_-	YIL166C_5UTR_0_1112	-0.0588965	-1.77574	-0.409022	0.685391	0.873762	-6.91623	TSS	YIL166C	YIL166C	1	TRUE	-	4	73	4	chrIX	33054	G	GAA	FALSE	2	2	0	0	0	0	0	0.637	2.56427	FALSE	NA	NA	3	282	77	21	FALSE	FALSE	FALSE	488	NA	FALSE	0.363	0.637	TRUE
chrIX_33198_T_G_-	YIL166C_chrIX_33198_T_G_72_2	0.0795012	-0.695663	0.529841	0.603225	0.852565	-6.46132	UpStream	YIL166C	YIL166C	1	TRUE	-	1	73	1	chrIX	33198	T	G	TRUE	0	0	0	1	-1	0	0	0.555	2.56427	FALSE	NA	NA	3	282	77	21	FALSE	FALSE	FALSE	632	3.05	TRUE	0.445	0.555	TRUE
chrIX_33327_A_G_-	YIL166C_chrIX_33327_A_G_72_2	0.439974	0.0889424	4.38735	0.00042169	0.0107076	-0.0547047	UpStream	YIL166C	YIL166C	1	TRUE	-	1	73	1	chrIX	33327	A	G	TRUE	0	-1	0	1	0	0	0	0.545	2.56427	FALSE	NA	NA	3	282	77	21	FALSE	FALSE	FALSE	761	NA	FALSE	0.455	0.545	TRUE
chrIX_33340_A_G_-	YIL166C_chrIX_33340_A_G_72_2	0.229841	0.119596	2.57371	0.0199623	0.151009	-3.70696	UpStream	YIL166C	YIL166C	1	TRUE	-	1	73	1	chrIX	33340	A	G	TRUE	0	-1	0	1	0	0	0	0.545	2.56427	FALSE	NA	NA	3	282	77	21	FALSE	FALSE	FALSE	774	NA	FALSE	0.455	0.545	TRUE
chrIX_34975_C_A_-	YIL164C_chrIX_34975_C_A_72_2	0.193911	-0.0500276	1.65561	0.116547	0.394581	-5.29227	UpStream	YIL164C	YIL164C	1	TRUE	-	1	73	1	chrIX	34975	C	A	TRUE	0	1	-1	0	0	0	0	0.617	6.26204	FALSE	0.0423156	0.031793	1	405	147	80	FALSE	FALSE	FALSE	289	1.17	TRUE	0.383	0.617	TRUE
chrIX_35118_C_G_-	YIL164C_chrIX_35118_C_G_72_2	-0.346554	0.177769	-4.11364	0.000755522	0.0162446	-0.645393	UpStream	YIL164C	YIL164C	1	TRUE	-	1	73	1	chrIX	35118	C	G	TRUE	0	0	-1	1	0	0	0	0.905	6.26204	FALSE	0.0423156	0.031793	1	405	147	80	FALSE	FALSE	FALSE	432	NA	FALSE	0.095	0.095	FALSE
chrIX_37299_CTT_CT_+	YIL162W_5UTR_0_2	0.216459	1.45146	0.788222	0.436669	0.714057	-5.53469	TSS	YIL162W	YIL162W	1	TRUE	+	1	98	1	chrIX	37299	CTT	CT	FALSE	-1	0	0	0	-1	0	0	0.615	5.00408	FALSE	0.0522752	0.0289026	8	839	228	62	FALSE	FALSE	FALSE	86	3.98	TRUE	0.385	NA	NA
chrIX_39286_A_C_+	YIL161W_5UTR_0_2111111	-0.0342191	0.202826	-0.614185	0.543662	0.787596	-6.91624	TSS	YIL161W	YIL161W	1	TRUE	+	7	8	1	chrIX	39286	A	C	TRUE	0	-1	1	0	0	0	0	0.597	5.79676	FALSE	0.259904	0.200427	19	780	137	42	FALSE	FALSE	FALSE	147	0.88	TRUE	0.403	0.597	TRUE
chrIX_39289_T_C_+	YIL161W_5UTR_0_1211111	-0.0974471	0.169402	-1.96005	0.05921	0.259685	-5.2919	TSS	YIL161W	YIL161W	1	TRUE	+	7	11	2	chrIX	39289	T	C	TRUE	0	0	1	0	-1	0	0	0.574	5.79676	FALSE	0.259904	0.200427	19	780	137	42	FALSE	FALSE	FALSE	144	0.88	TRUE	0.426	0.574	TRUE
chrIX_39328_G_A_+	YIL161W_5UTR_0_1121111	-0.169262	0.135635	-3.09612	0.00418974	0.0516433	-2.79008	TSS	YIL161W	YIL161W	1	TRUE	+	7	50	3	chrIX	39328	G	A	TRUE	0	1	0	-1	0	0	0	0.598	5.79676	FALSE	0.259904	0.200427	19	780	137	42	FALSE	FALSE	FALSE	105	0.88	TRUE	0.402	0.598	TRUE
chrIX_39373_TAAA_TAA,TAAAA_+	YIL161W_5UTR_0_1112111	0.00543603	0.222791	0.10468	0.917317	0.968031	-7.18375	TSS	YIL161W	YIL161W	1	TRUE	+	7	95	4	chrIX	39373	TAAA	TAA	FALSE	-1	-1	0	0	0	0	0	0.562	5.79676	FALSE	0.259904	0.200427	19	780	137	42	FALSE	FALSE	FALSE	60	0.88	TRUE	0.438	NA	NA
chrIX_39386_C_T_+	YIL161W_5UTR_0_1111211	-0.00179797	0.217904	-0.0333418	0.97362	0.992589	-7.08695	TSS	YIL161W	YIL161W	1	TRUE	+	7	108	5	chrIX	39386	C	T	TRUE	0	0	-1	0	1	0	0	0.666	5.79676	FALSE	0.259904	0.200427	19	780	137	42	FALSE	FALSE	FALSE	47	NA	FALSE	0.334	0.666	TRUE
chrIX_39393_T_G_+	YIL161W_5UTR_0_1111121	-0.164375	0.137882	-2.64432	0.0128267	0.106641	-3.84913	TSS	YIL161W	YIL161W	1	TRUE	+	7	115	6	chrIX	39393	T	G	TRUE	0	0	0	1	-1	0	0	0.7	5.79676	FALSE	0.259904	0.200427	19	780	137	42	FALSE	FALSE	FALSE	40	2.38	TRUE	0.3	0.3	FALSE
chrIX_39412_CA_C_+	YIL161W_5UTR_0_1111112	-0.0854784	0.177465	-1.46463	0.153286	0.428381	-6.05135	TSS	YIL161W	YIL161W	1	TRUE	+	7	134	7	chrIX	39412	CA	C	FALSE	-1	-1	0	0	0	0	0	0.595	5.79676	FALSE	0.259904	0.200427	19	780	137	42	FALSE	FALSE	FALSE	21	2.38	TRUE	0.405	0.595	TRUE
chrIX_41532_A_G_+	YIL159W_chrIX_41532_A_G_72_2	-0.0534619	-0.662603	-0.459044	0.652145	0.874241	-6.73528	UpStream	YIL159W	YIL159W	1	TRUE	+	1	73	1	chrIX	41532	A	G	TRUE	0	-1	0	1	0	0	1	0.969	3.58132	FALSE	0.123549	0.0929757	51	723	191	70	FALSE	FALSE	FALSE	293	1.62	TRUE	0.031	0.031	FALSE
chrIX_41532_A_G_-	YIL160C_5UTR_0_2	0.276766	0.847498	1.39652	0.172669	0.454268	-5.12001	TSS	YIL160C	YIL160C	1	TRUE	-	1	77	1	chrIX	41532	A	G	TRUE	0	-1	0	1	0	0	0	0.969	2.2778	FALSE	0.0444986	0.0322129	7	1070	484	228	FALSE	TRUE	FALSE	88	1.62	TRUE	0.031	0.031	FALSE
chrIX_41668_A_C_+	YIL159W_5UTR_0_2	0.0376538	-0.84573	0.330124	0.74357	0.89553	-6.69221	TSS	YIL159W	YIL159W	1	TRUE	+	1	12	1	chrIX	41668	A	C	TRUE	0	-1	1	0	0	0	0	0.002051	3.58132	FALSE	0.123549	0.0929757	51	723	191	70	FALSE	FALSE	FALSE	157	NA	FALSE	0.002051	0.002051	TRUE
chrIX_46057_C_G_+	YIL158W_chrIX_46057_C_G_72_2	0.0838781	2.49721	1.35918	0.192236	0.512651	-5.97485	UpStream	YIL158W	YIL158W	1	TRUE	+	1	73	1	chrIX	46057	C	G	TRUE	0	0	-1	1	0	0	0	0.983	6.67593	FALSE	0.186067	0.144387	3	657	71	20	FALSE	FALSE	TRUE	144	NA	FALSE	0.017	0.017	FALSE
chrIX_46102_C_A_+	YIL158W_chrIX_46102_C_A_72_2	-0.00203563	1.41976	-0.0285925	0.97753	0.991568	-6.75511	UpStream	YIL158W	YIL158W	1	TRUE	+	1	73	1	chrIX	46102	C	A	TRUE	0	1	-1	0	0	0	0	0.984	6.67593	FALSE	0.186067	0.144387	3	657	71	20	FALSE	FALSE	TRUE	99	NA	FALSE	0.016	0.016	FALSE
chrIX_53815_C_T_-	YIL155C_chrIX_53815_C_T_72_2	0.280442	-0.906488	2.08704	0.052603	0.259277	-4.5182	UpStream	YIL155C	YIL155C	1	TRUE	-	1	73	1	chrIX	53815	C	T	TRUE	0	0	-1	0	1	0	0	0.456	5.95293	FALSE	NA	NA	5	976	163	33	FALSE	TRUE	FALSE	107	NA	FALSE	0.456	0.456	TRUE
chrIX_55071_C_A_+	YIL153W_5UTR_0_2	0.0382712	-0.793813	0.244304	0.808637	0.925419	-6.17047	TSS	YIL153W	YIL153W	1	TRUE	+	1	39	1	chrIX	55071	C	A	TRUE	0	1	-1	0	0	0	0	0.896	5.94289	FALSE	0.0662656	0.0507079	21	1446	391	146	FALSE	FALSE	FALSE	127	NA	FALSE	0.104	0.104	FALSE
chrIX_60844_T_C_-	YIL151C_chrIX_60844_T_C_72_2	0.112181	-0.666918	1.19714	0.248039	0.584443	-6.04693	UpStream	YIL151C	YIL151C	1	TRUE	-	1	73	1	chrIX	60844	T	C	TRUE	0	0	1	0	-1	0	0	0.971	4.97596	FALSE	0.102343	0.0726844	11	559	147	50	FALSE	FALSE	TRUE	150	4.85	TRUE	0.029	0.029	FALSE
chrIX_60879_A_C_-	YIL151C_chrIX_60879_A_C_72_2	0.0562996	-0.291935	0.47713	0.639479	0.870178	-6.75279	UpStream	YIL151C	YIL151C	1	TRUE	-	1	73	1	chrIX	60879	A	C	TRUE	0	-1	1	0	0	0	0	0.99	4.97596	FALSE	0.102343	0.0726844	11	559	147	50	FALSE	FALSE	TRUE	185	NA	FALSE	0.01	0.01	FALSE
chrIX_62815_A_G_-	YIL150C_5UTR_0_2	-0.0138369	-0.0995807	-0.120923	0.904548	0.963814	-6.55917	TSS	YIL150C	YIL150C	1	TRUE	-	1	89	1	chrIX	62815	A	G	TRUE	0	-1	0	1	0	0	0	0.638	3.8188	TRUE	0.0840565	0.0650507	33	1754	619	283	FALSE	TRUE	FALSE	87	NA	FALSE	0.362	0.638	TRUE
chrIX_77291_A_G_+	YIL144W_chrIX_77291_A_G_72_2	0.107003	-1.89898	0.587316	0.564881	0.830865	-6.28098	UpStream	YIL144W	YIL144W	1	TRUE	+	1	73	1	chrIX	77291	A	G	TRUE	0	-1	0	1	0	0	0	0.65	5.29279	TRUE	0.0596675	0.0461739	86	1038	415	180	FALSE	TRUE	FALSE	783	2.73	TRUE	0.35	0.65	TRUE
chrIX_77331_G_A_-	YIL145C_5UTR_0_21	0.00187793	-0.518183	0.0328249	0.974029	0.992672	-7.06361	TSS	YIL145C	YIL145C	1	TRUE	-	2	106	1	chrIX	77331	G	A	TRUE	0	1	0	-1	0	0	0	0.943	6.45337	FALSE	0.0860064	0.0624276	5	810	258	89	FALSE	FALSE	FALSE	48	2.73	TRUE	0.057	0.057	FALSE
chrIX_77427_A_T_-	YIL145C_5UTR_0_12	-0.144025	-0.592479	-2.73023	0.010429	0.0922798	-3.67508	TSS	YIL145C	YIL145C	1	TRUE	-	2	10	2	chrIX	77427	A	T	TRUE	0	-1	0	0	1	0	0	0.801	6.45337	FALSE	0.0860064	0.0624276	5	810	258	89	FALSE	FALSE	FALSE	144	3.66	TRUE	0.199	0.199	FALSE
chrIX_77531_A_G_-	YIL145C_chrIX_77531_A_G_72_2	0.247827	-1.26294	1.52514	0.146014	0.443602	-5.09995	UpStream	YIL145C	YIL145C	1	TRUE	-	1	73	1	chrIX	77531	A	G	TRUE	0	-1	0	1	0	0	0	0.646	6.45337	FALSE	0.0860064	0.0624276	5	810	258	89	FALSE	FALSE	FALSE	248	3.66	TRUE	0.354	0.646	TRUE
chrIX_77692_G_T_+	YIL144W_chrIX_77692_G_T_72_2	-0.0749909	-0.653496	-0.649517	0.524874	0.806625	-6.58854	UpStream	YIL144W	YIL144W	1	TRUE	+	1	73	1	chrIX	77692	G	T	TRUE	0	0	0	-1	1	0	0	0.83	5.29279	TRUE	0.0596675	0.0461739	86	1038	415	180	FALSE	TRUE	FALSE	382	0.92	TRUE	0.17	0.83	TRUE
chrIX_77788_G_A_-	YIL145C_chrIX_77788_G_A_72_2	0.11057	-1.33471	0.598976	0.557261	0.825823	-6.17673	UpStream	YIL145C	YIL145C	1	TRUE	-	1	73	1	chrIX	77788	G	A	TRUE	0	1	0	-1	0	0	0	0.661	6.45337	FALSE	0.0860064	0.0624276	5	810	258	89	FALSE	FALSE	FALSE	505	0.92	TRUE	0.339	0.661	TRUE
chrIX_92809_C_T_+	YIL136W_chrIX_92809_C_T_72_2	0.0664315	-1.18429	0.622745	0.541898	0.816226	-6.47827	UpStream	YIL136W	YIL136W	1	TRUE	+	1	73	1	chrIX	92809	C	T	TRUE	0	0	-1	0	1	0	0	0.566	7.35168	FALSE	0.0559139	0.0410963	18	484	92	30	FALSE	FALSE	FALSE	810	4.82	TRUE	0.434	0.566	TRUE
chrIX_92857_C_T_-	YIL137C_5UTR_0_211	-0.0318557	-0.830146	-0.321251	0.750218	0.897836	-6.88589	TSS	YIL137C	YIL137C	1	TRUE	-	3	104	1	chrIX	92857	C	T	TRUE	0	0	-1	0	1	0	0	0.66	5.28243	FALSE	NA	NA	7	749	70	27	FALSE	FALSE	FALSE	69	NA	FALSE	0.34	0.66	TRUE
chrIX_92857_C_T_+	YIL136W_chrIX_92857_C_T_72_2	-0.0906545	-1.42821	-1.017	0.323723	0.662117	-6.22904	UpStream	YIL136W	YIL136W	1	TRUE	+	1	73	1	chrIX	92857	C	T	TRUE	0	0	-1	0	1	0	0	0.66	7.35168	FALSE	0.0559139	0.0410963	18	484	92	30	FALSE	FALSE	FALSE	762	NA	FALSE	0.34	0.66	TRUE
chrIX_92947_G_A_+	YIL136W_chrIX_92947_G_A_72_2	-0.033743	-0.839356	-0.376355	0.711411	0.907133	-6.73919	UpStream	YIL136W	YIL136W	1	TRUE	+	1	73	1	chrIX	92947	G	A	TRUE	0	1	0	-1	0	0	0	0.923	7.35168	FALSE	0.0559139	0.0410963	18	484	92	30	FALSE	FALSE	FALSE	672	NA	FALSE	0.077	0.077	FALSE
chrIX_92947_G_A_-	YIL137C_5UTR_0_121	0.291809	-0.671915	3.6108	0.00108406	0.0190799	-1.35786	TSS	YIL137C	YIL137C	1	TRUE	-	3	14	2	chrIX	92947	G	A	TRUE	0	1	0	-1	0	0	0	0.923	5.28243	FALSE	NA	NA	7	749	70	27	FALSE	FALSE	FALSE	159	NA	FALSE	0.077	0.077	FALSE
chrIX_92948_A_T_-	YIL137C_5UTR_0_112	-0.0133603	-0.817512	-0.15178	0.880363	0.95177	-6.90025	TSS	YIL137C	YIL137C	1	TRUE	-	3	13	3	chrIX	92948	A	T	TRUE	0	-1	0	0	1	0	0	0.96	5.28243	FALSE	NA	NA	7	749	70	27	FALSE	FALSE	FALSE	160	NA	FALSE	0.04	0.04	FALSE
chrIX_92948_A_T_+	YIL136W_chrIX_92948_A_T_72_2	0.0361078	-0.832626	0.295323	0.771402	0.925346	-6.65402	UpStream	YIL136W	YIL136W	1	TRUE	+	1	73	1	chrIX	92948	A	T	TRUE	0	-1	0	0	1	0	0	0.96	7.35168	FALSE	0.0559139	0.0410963	18	484	92	30	FALSE	FALSE	FALSE	671	NA	FALSE	0.04	0.04	FALSE
chrIX_92996_TGA_T_+	YIL136W_chrIX_92996_TGA_T_72_2	0.183526	-0.59605	0.9216	0.369914	0.703466	-5.8105	UpStream	YIL136W	YIL136W	1	TRUE	+	1	72	1	chrIX	92996	TGA	T	FALSE	-2	-1	0	-1	0	0	0	0.914	7.35168	FALSE	0.0559139	0.0410963	18	484	92	30	FALSE	FALSE	FALSE	623	2.62	TRUE	0.086	0.086	FALSE
chrIX_92999_A_ACT_+	YIL136W_chrIX_92999_A_ACT_72_2	0.203092	-0.682373	1.0079	0.327945	0.664665	-5.80874	UpStream	YIL136W	YIL136W	1	TRUE	+	1	73	1	chrIX	92999	A	ACT	FALSE	2	0	1	0	1	0	0	0.574	7.35168	FALSE	0.0559139	0.0410963	18	484	92	30	FALSE	FALSE	FALSE	620	2.62	TRUE	0.426	NA	NA
chrIX_93013_G_T_+	YIL136W_chrIX_93013_G_T_72_2	0.0631337	-0.754392	0.615879	0.546312	0.818881	-6.56406	UpStream	YIL136W	YIL136W	1	TRUE	+	1	73	1	chrIX	93013	G	T	TRUE	0	0	0	-1	1	0	0	0.797	7.35168	FALSE	0.0559139	0.0410963	18	484	92	30	FALSE	FALSE	FALSE	606	2.62	TRUE	0.203	0.797	TRUE
chrIX_93013_G_T_-	YIL137C_chrIX_93013_G_T_72_2	-0.293175	-1.32069	-2.89726	0.0101899	0.100305	-2.97051	UpStream	YIL137C	YIL137C	1	TRUE	-	1	73	1	chrIX	93013	G	T	TRUE	0	0	0	-1	1	0	0	0.797	5.28243	FALSE	NA	NA	7	749	70	27	FALSE	FALSE	FALSE	225	2.62	TRUE	0.203	0.797	TRUE
chrIX_93053_C_A_+	YIL136W_chrIX_93053_C_A_72_2	-0.214648	-0.930053	-1.8793	0.0778432	0.309903	-4.94974	UpStream	YIL136W	YIL136W	1	TRUE	+	1	73	1	chrIX	93053	C	A	TRUE	0	1	-1	0	0	0	0	0.935	7.35168	FALSE	0.0559139	0.0410963	18	484	92	30	FALSE	FALSE	FALSE	566	2.62	TRUE	0.065	0.065	FALSE
chrIX_93433_C_T_+	YIL136W_chrIX_93433_C_T_72_2	0.0384953	-0.0318626	0.391287	0.700553	0.90207	-6.56282	UpStream	YIL136W	YIL136W	1	TRUE	+	1	73	1	chrIX	93433	C	T	TRUE	0	0	-1	0	1	0	0	0.56	7.35168	FALSE	0.0559139	0.0410963	18	484	92	30	FALSE	FALSE	FALSE	186	2.44	TRUE	0.44	0.56	TRUE
chrIX_93433_C_T_-	YIL137C_chrIX_93433_C_T_72_2	-0.204469	-0.261161	-1.67345	0.112942	0.386957	-5.02713	UpStream	YIL137C	YIL137C	1	TRUE	-	1	73	1	chrIX	93433	C	T	TRUE	0	0	-1	0	1	0	0	0.56	5.28243	FALSE	NA	NA	7	749	70	27	FALSE	FALSE	FALSE	645	2.44	TRUE	0.44	0.56	TRUE
[truncated: 4,905 more rows]
