# Supplementary material for: Massively parallel identification of causal variants underlying gene expression differences in a yeast cross
Source: bioRxiv preprint, doi:10.1101/2020.08.31.276337, version 1 (2020-08-31)
Supplement: Table S9 [file 276337_file11.xlsx]

## Sheet: logisticRegressions
FEATURE	Estimate_FeatureAndAveExprAndLibrary	StdError_FeatureAndAveExprAndLibrary	ANOVA_FeatureAndAveExprAndLibraryVsAveExprAndLibrary	adj.P.val_FeatureAndAveExprAndLibrary
SNP	0.3244	0.141989	0.0184679	0.079414
SignificantGeneIsDesignedGene	0.53237	1.03806	0.579623	0.844912
essential	-0.352863	0.144228	0.0113173	0.0621953
isTF	-0.0560792	0.286797	0.843922	0.980515
hasHumanHomolog	-0.0641791	0.101636	0.527044	0.762816
hasParalog	0.109354	0.122468	0.375711	0.587158
inANucleosome	-0.271727	0.101701	0.00782371	0.0428527
numberVarsInOligo	0.00606201	0.0572299	0.915982	0.980515
varPosInOligo	-0.0702008	0.0481827	0.144552	0.279068
numberOfGenes	-0.00273875	0.0469693	0.953243	0.980515
delta_BP	0.113018	0.0419528	0.00219045	0.0411139
delta_A	0.111022	0.0408532	0.00280958	0.0401047
delta_T	0.094918	0.0359196	0.00679376	0.0446979
delta_G	0.12587	0.0391659	0.000786569	0.0168358
delta_C	0.0991627	0.0401601	0.00889992	0.0607354
delta_TATA	0.0796037	0.0362833	0.045795	0.0920954
delta_ATG	-0.0514025	0.0525399	0.316933	0.531246
GCContentOfOligo	0.0407163	0.0499454	0.415939	0.63477
GCFoldChange	0.023127	0.0498924	0.640486	0.877128
expression	-0.126318	0.0542411	0.019379	0.0750502
dNdS	0.124912	0.0717763	0.0873206	0.188605
dNdS_adjust	0.120791	0.0719455	0.0990536	0.205488
PPI	0.00814416	0.0471799	0.864616	0.980515
GxGLenient	-0.0855176	0.0558354	0.120187	0.252409
GxGIntermediate	-0.131847	0.0585767	0.0201424	0.0844251
GxGStrict	-0.130156	0.0591854	0.0225983	0.091627
distFromGene	-0.0242825	0.0566715	0.66648	0.897988
nucleosomeScore	0.0573919	0.0642963	0.380551	0.587158
phastConScore	0.165499	0.0458352	0.000416136	0.0087099
MAF	-0.0483134	0.0497838	0.332124	0.536025
DAF	-0.112623	0.0531611	0.0330875	0.102989
ABF2_differenceOfMax_Plus_AboveCutOff	0.0458748	0.0440358	0.341672	0.491542
CAT8_differenceOfMax_Plus_AboveCutOff	-0.00742017	0.056634	0.893847	0.980515
CST6_differenceOfMax_Plus_AboveCutOff	0.0255377	0.0482046	0.609409	0.833903
ECM23_differenceOfMax_Plus_AboveCutOff	0.00845376	0.0483833	0.86277	0.980515
EDS1_differenceOfMax_Plus_AboveCutOff	NA	NA	NA	NA
FKH2_differenceOfMax_Plus_AboveCutOff	-0.379308	7.93083	0.288204	0.980515
FZF1_differenceOfMax_Plus_AboveCutOff	-0.0273972	0.062137	0.637351	0.890465
GIS1_differenceOfMax_Plus_AboveCutOff	0.0749528	0.0320516	0.0331699	0.0736967
GSM1_differenceOfMax_Plus_AboveCutOff	0.024137	0.0495504	0.6355	0.862817
GZF3_differenceOfMax_Plus_AboveCutOff	0.0515464	0.0418584	0.241313	0.383435
HCM1_differenceOfMax_Plus_AboveCutOff	-0.0264205	0.0566615	0.631992	0.875362
HMRA2_differenceOfMax_Plus_AboveCutOff	0.0180203	0.0436824	0.691347	0.910812
NHP10_differenceOfMax_Plus_AboveCutOff	-0.192808	5.95654	0.623395	0.980515
PDR8_differenceOfMax_Plus_AboveCutOff	-0.0561067	0.0618934	0.315076	0.576541
REB1_differenceOfMax_Plus_AboveCutOff	-3.25372	75.2047	0.400928	0.980515
REI1_differenceOfMax_Plus_AboveCutOff	0.053565	0.0315313	0.12242	0.199808
RSC30_differenceOfMax_Plus_AboveCutOff	0.0543078	0.0393471	0.209752	0.310759
RSC3_differenceOfMax_Plus_AboveCutOff	0.0255417	0.0410773	0.551842	0.768975
RSF2_differenceOfMax_Plus_AboveCutOff	0.0938199	0.0280786	0.0014243	0.0138751
STE12_differenceOfMax_Plus_AboveCutOff	0.00409154	0.0499018	0.935418	0.980515
STP3_differenceOfMax_Plus_AboveCutOff	0.0376176	0.0389022	0.366828	0.537589
STP4_differenceOfMax_Plus_AboveCutOff	-0.00402736	0.0501432	0.935464	0.980515
SWI5_differenceOfMax_Plus_AboveCutOff	0.0402711	0.0380648	0.323534	0.482401
TOS8_differenceOfMax_Plus_AboveCutOff	0.0108437	0.0477843	0.822823	0.980515
USV1_differenceOfMax_Plus_AboveCutOff	0.0863546	0.0375384	0.0336865	0.0774595
YER130C_differenceOfMax_Plus_AboveCutOff	0.0695952	0.0312997	0.0442799	0.0886145
YER184C_differenceOfMax_Plus_AboveCutOff	-0.0133662	0.0554298	0.806644	0.980515
YLR278C_differenceOfMax_Plus_AboveCutOff	-0.0656849	0.0765367	0.328037	0.607454
YNR063W_differenceOfMax_Plus_AboveCutOff	-0.628359	14.3519	0.148858	0.980515
YOX1_differenceOfMax_Plus_AboveCutOff	-0.0123659	0.0527299	0.811558	0.980515
YPR022C_differenceOfMax_Plus_AboveCutOff	-0.0112836	0.0487533	0.812855	0.980515
YPR196W_differenceOfMax_Plus_AboveCutOff	0.0531465	0.0405354	0.212852	0.342204
ACA1_differenceOfMax_Plus_AboveCutOff	NA	NA	NA	NA
ADR1_differenceOfMax_Plus_AboveCutOff	NA	NA	NA	NA
AFT1_differenceOfMax_Plus_AboveCutOff	-0.183478	5.75738	0.649327	0.980515
DAL81_differenceOfMax_Plus_AboveCutOff	NA	NA	NA	NA
DAL82_differenceOfMax_Plus_AboveCutOff	-0.226316	4.99221	0.508562	0.980515
DIG1_differenceOfMax_Plus_AboveCutOff	NA	NA	NA	NA
FKH1_differenceOfMax_Plus_AboveCutOff	-0.508312	14.3735	0.259346	0.980515
MIG1_differenceOfMax_Plus_AboveCutOff	-0.130361	4.0714	0.641673	0.980515
OPI1_differenceOfMax_Plus_AboveCutOff	-0.366016	8.37652	0.358918	0.980515
PIP2_differenceOfMax_Plus_AboveCutOff	NA	NA	NA	NA
PPR1_differenceOfMax_Plus_AboveCutOff	-0.126517	4.0714	0.687729	0.980515
RGM1_differenceOfMax_Plus_AboveCutOff	NA	NA	NA	NA
RTG1_differenceOfMax_Plus_AboveCutOff	NA	NA	NA	NA
SKN7_differenceOfMax_Plus_AboveCutOff	-0.233312	7.25635	0.634755	0.980515
UPC2_differenceOfMax_Plus_AboveCutOff	-0.129679	4.0714	0.650194	0.980515
WAR1_differenceOfMax_Plus_AboveCutOff	NA	NA	NA	NA
XBP1_differenceOfMax_Plus_AboveCutOff	-6.43137	196.425	0.176618	0.980515
AFT2_differenceOfMax_Plus_AboveCutOff	0.0481992	0.0347067	0.206029	0.307677
MATA2_differenceOfMax_Plus_AboveCutOff	0.100911	0.0386333	0.0161758	0.0466388
MSN1_differenceOfMax_Plus_AboveCutOff	0.0494727	0.0312808	0.150394	0.235856
NRG2_differenceOfMax_Plus_AboveCutOff	0.0480263	0.0393374	0.266115	0.389104
ROX1_differenceOfMax_Plus_AboveCutOff	0.0316147	0.0461748	0.509497	0.720615
DAL80_differenceOfMax_Plus_AboveCutOff	0.0013978	0.05119	0.97825	0.982378
GLN3_differenceOfMax_Plus_AboveCutOff	-0.0071253	0.0467674	0.87636	0.980515
HAP4_differenceOfMax_Plus_AboveCutOff	-0.128775	4.0714	0.661255	0.980515
MET4_differenceOfMax_Plus_AboveCutOff	NA	NA	NA	NA
MOT2_differenceOfMax_Plus_AboveCutOff	0.0101097	0.0467239	0.833735	0.980515
MSN2_differenceOfMax_Plus_AboveCutOff	0.0216106	0.040167	0.613763	0.827811
MSN4_differenceOfMax_Plus_AboveCutOff	0.037901	0.055074	0.525253	0.718599
NDD1_differenceOfMax_Plus_AboveCutOff	0.0156619	0.0342404	0.664248	0.881237
RIM101_differenceOfMax_Plus_AboveCutOff	-0.250779	6.70446	0.386194	0.980515
SOK2_differenceOfMax_Plus_AboveCutOff	0.107283	0.0285533	0.000583943	0.00641666
SPT23_differenceOfMax_Plus_AboveCutOff	0.0931867	0.0369635	0.0228984	0.0555302
SPT2_differenceOfMax_Plus_AboveCutOff	0.0864681	0.04722	0.0631085	0.164541
STB1_differenceOfMax_Plus_AboveCutOff	0.0208476	0.031155	0.535448	0.733342
STB5_differenceOfMax_Plus_AboveCutOff	-0.0116407	0.050796	0.813504	0.980515
SUT1_differenceOfMax_Plus_AboveCutOff	0.0561739	0.033336	0.124513	0.203673
THO2_differenceOfMax_Plus_AboveCutOff	-7.46634	191.914	0.0547157	0.980515
UME1_differenceOfMax_Plus_AboveCutOff	-0.193454	5.75738	0.554529	0.980515
ZAP1_differenceOfMax_Plus_AboveCutOff	NA	NA	NA	NA
ABF1_differenceOfMax_Plus_AboveCutOff	0.477058	9.44712	0.000357916	0.980515
ACE2_differenceOfMax_Plus_AboveCutOff	0.0773806	0.0323068	0.0280683	0.0666539
ARG81_differenceOfMax_Plus_AboveCutOff	0.0630637	0.0360401	0.104719	0.186166
ASH1_differenceOfMax_Plus_AboveCutOff	-0.0900207	0.0718648	0.145953	0.37272
AZF1_differenceOfMax_Plus_AboveCutOff	NA	NA	NA	NA
CBF1_differenceOfMax_Plus_AboveCutOff	-0.13145	4.09458	0.637315	0.980515
GAL4_differenceOfMax_Plus_AboveCutOff	NA	NA	NA	NA
GAT3_differenceOfMax_Plus_AboveCutOff	-0.0143879	0.0541489	0.785755	0.980515
GCR2_differenceOfMax_Plus_AboveCutOff	-0.712557	14.0198	0.089598	0.980515
GTS1_differenceOfMax_Plus_AboveCutOff	0.0291419	0.0273488	0.338451	0.478276
HAC1_differenceOfMax_Plus_AboveCutOff	NA	NA	NA	NA
HAP2_differenceOfMax_Plus_AboveCutOff	0.0925763	0.0282774	0.000666595	0.0147703
IME1_differenceOfMax_Plus_AboveCutOff	-0.131947	4.0714	0.621333	0.980515
IXR1_differenceOfMax_Plus_AboveCutOff	NA	NA	NA	NA
JHD1_differenceOfMax_Plus_AboveCutOff	-0.00336889	0.0478954	0.943374	0.980515
MATA1_differenceOfMax_Plus_AboveCutOff	0.0604258	0.0264287	0.0225191	0.0792165
MET32_differenceOfMax_Plus_AboveCutOff	NA	NA	NA	NA
MOT3_differenceOfMax_Plus_AboveCutOff	0.0696319	0.0325455	0.0501244	0.0996364
PDR1_differenceOfMax_Plus_AboveCutOff	-0.130502	4.0714	0.639891	0.980515
RFX1_differenceOfMax_Plus_AboveCutOff	0.184184	4.0714	0.0345124	0.980515
RGT1_differenceOfMax_Plus_AboveCutOff	NA	NA	NA	NA
RME1_differenceOfMax_Plus_AboveCutOff	0.0700233	0.0318256	0.0456148	0.0915559
RTG3_differenceOfMax_Plus_AboveCutOff	-0.220525	4.867	0.509191	0.980515
SKO1_differenceOfMax_Plus_AboveCutOff	NA	NA	NA	NA
SNF1_differenceOfMax_Plus_AboveCutOff	NA	NA	NA	NA
SNT2_differenceOfMax_Plus_AboveCutOff	NA	NA	NA	NA
STB2_differenceOfMax_Plus_AboveCutOff	0.0757804	0.0391024	0.0796939	0.138131
STP1_differenceOfMax_Plus_AboveCutOff	-0.232906	5.02199	0.464137	0.980515
SWI4_differenceOfMax_Plus_AboveCutOff	0.0907133	0.0294336	0.00360869	0.0202112
SWI6_differenceOfMax_Plus_AboveCutOff	0.0700995	0.0297247	0.0295943	0.0716708
THI2_differenceOfMax_Plus_AboveCutOff	0.556956	11.8824	0.00380613	0.980515
URC2_differenceOfMax_Plus_AboveCutOff	NA	NA	NA	NA
YHP1_differenceOfMax_Plus_AboveCutOff	-0.0528452	0.0668188	0.370307	0.649405
YRR1_differenceOfMax_Plus_AboveCutOff	NA	NA	NA	NA
ARG80_differenceOfMax_Plus_AboveCutOff	-3.48736	80.4434	0.335902	0.980515
ARO80_differenceOfMax_Plus_AboveCutOff	NA	NA	NA	NA
ARR1_differenceOfMax_Plus_AboveCutOff	-0.526263	11.1346	0.110406	0.980515
CHA4_differenceOfMax_Plus_AboveCutOff	-0.17987	5.79224	0.688698	0.980515
CUP9_differenceOfMax_Plus_AboveCutOff	NA	NA	NA	NA
HMS1_differenceOfMax_Plus_AboveCutOff	-0.0219843	0.0521567	0.665837	0.903884
INO2_differenceOfMax_Plus_AboveCutOff	0.0173087	0.0363127	0.652774	0.870219
MCM1_differenceOfMax_Plus_AboveCutOff	-0.295028	6.70667	0.291536	0.980515
MET28_differenceOfMax_Plus_AboveCutOff	-0.363331	8.42125	0.334806	0.980515
MGA1_differenceOfMax_Plus_AboveCutOff	0.0354782	0.0427362	0.430837	0.624336
PDR3_differenceOfMax_Plus_AboveCutOff	0.0371261	0.0391898	0.387814	0.550052
PHO4_differenceOfMax_Plus_AboveCutOff	NA	NA	NA	NA
PUT3_differenceOfMax_Plus_AboveCutOff	NA	NA	NA	NA
RAP1_differenceOfMax_Plus_AboveCutOff	-3.74407	113.226	0.204976	0.980515
SMP1_differenceOfMax_Plus_AboveCutOff	0.0190408	0.0401986	0.64615	0.871536
UGA3_differenceOfMax_Plus_AboveCutOff	-0.323914	6.72388	0.275108	0.980515
YAP3_differenceOfMax_Plus_AboveCutOff	0.0455692	0.0416452	0.294661	0.462244
YAP5_differenceOfMax_Plus_AboveCutOff	-0.129245	4.0714	0.655534	0.980515
CUP2_differenceOfMax_Plus_AboveCutOff	NA	NA	NA	NA
GAL80_differenceOfMax_Plus_AboveCutOff	NA	NA	NA	NA
HAP5_differenceOfMax_Plus_AboveCutOff	-1.9457	46.5725	0.406956	0.980515
HSF1_differenceOfMax_Plus_AboveCutOff	0.0380432	0.0252187	0.163304	0.260828
INO4_differenceOfMax_Plus_AboveCutOff	-1.32041	31.065	0.506409	0.980515
MATALPHA2_differenceOfMax_Plus_AboveCutOff	-0.275979	5.97906	0.540379	0.980515
ORC1_differenceOfMax_Plus_AboveCutOff	0.043721	0.031472	0.206131	0.307677
SPT15_differenceOfMax_Plus_AboveCutOff	0.0549077	0.0321766	0.119055	0.198722
STB4_differenceOfMax_Plus_AboveCutOff	NA	NA	NA	NA
SUM1_differenceOfMax_Plus_AboveCutOff	0.0375922	0.0251177	0.169891	0.264191
UME6_differenceOfMax_Plus_AboveCutOff	0.18498	4.0714	0.0322357	0.980515
YAP1_differenceOfMax_Plus_AboveCutOff	NA	NA	NA	NA
YDR026C_differenceOfMax_Plus_AboveCutOff	-0.179519	5.41747	0.581236	0.980515
BAS1_differenceOfMax_Plus_AboveCutOff	-0.237802	7.25207	0.600574	0.980515
CAD1_differenceOfMax_Plus_AboveCutOff	NA	NA	NA	NA
CIN5_differenceOfMax_Plus_AboveCutOff	0.094518	0.0287396	0.00239776	0.014621
CRZ1_differenceOfMax_Plus_AboveCutOff	0.0979187	0.0355483	0.0125521	0.0374906
ERT1_differenceOfMax_Plus_AboveCutOff	-0.940347	22.1765	0.0347416	0.980515
GCN4_differenceOfMax_Plus_AboveCutOff	0.0446377	0.028373	0.151445	0.238104
GCR1_differenceOfMax_Plus_AboveCutOff	-0.183	5.61843	0.612557	0.980515
HAP1_differenceOfMax_Plus_AboveCutOff	0.0381978	0.0297326	0.248893	0.355352
HAP3_differenceOfMax_Plus_AboveCutOff	-0.174557	5.461	0.644459	0.980515
LEU3_differenceOfMax_Plus_AboveCutOff	NA	NA	NA	NA
MAC1_differenceOfMax_Plus_AboveCutOff	0.0222608	0.0377476	0.582492	0.791736
MBP1_differenceOfMax_Plus_AboveCutOff	0.00281112	0.0429616	0.948241	0.980515
MET31_differenceOfMax_Plus_AboveCutOff	NA	NA	NA	NA
NRG1_differenceOfMax_Plus_AboveCutOff	0.0631747	0.0348033	0.0975959	0.168763
PHD1_differenceOfMax_Plus_AboveCutOff	0.0877912	0.0360718	0.0256851	0.0629368
RLM1_differenceOfMax_Plus_AboveCutOff	0.0631674	0.0344517	0.0980469	0.164541
RPH1_differenceOfMax_Plus_AboveCutOff	0.0431949	0.036224	0.26542	0.404069
RPN4_differenceOfMax_Plus_AboveCutOff	NA	NA	NA	NA
SIP4_differenceOfMax_Plus_AboveCutOff	NA	NA	NA	NA
TEC1_differenceOfMax_Plus_AboveCutOff	0.022582	0.0453222	0.63872	0.855354
TYE7_differenceOfMax_Plus_AboveCutOff	0.0655866	0.0328857	0.0686362	0.125464
YAP6_differenceOfMax_Plus_AboveCutOff	0.0740205	0.0351249	0.055317	0.105303
YAP7_differenceOfMax_Plus_AboveCutOff	0.0184279	0.0359566	0.62985	0.844912
RDS2_differenceOfMax_Plus_AboveCutOff	0.120949	0.0374142	0.00286752	0.0160732
YGR067C_differenceOfMax_Plus_AboveCutOff	-0.0348993	0.055378	0.515941	0.763578
YML081W_differenceOfMax_Plus_AboveCutOff	0.105037	0.0370231	0.00794425	0.0327978
ASG1_differenceOfMax_Plus_AboveCutOff	-0.226703	4.8771	0.457434	0.980515
CEP3_differenceOfMax_Plus_AboveCutOff	NA	NA	NA	NA
DOT6_differenceOfMax_Plus_AboveCutOff	0.0343819	0.041119	0.432734	0.622095
ECM22_differenceOfMax_Plus_AboveCutOff	-0.17677	5.41221	0.60768	0.980515
FHL1_differenceOfMax_Plus_AboveCutOff	0.045774	0.0406871	0.288302	0.443291
GAT1_differenceOfMax_Plus_AboveCutOff	0.0729214	0.0314647	0.0211784	0.0754805
GAT4_differenceOfMax_Plus_AboveCutOff	-0.182188	4.07114	0.534618	0.980515
HAL9_differenceOfMax_Plus_AboveCutOff	0.0538444	0.0326386	0.133469	0.215067
LYS14_differenceOfMax_Plus_AboveCutOff	NA	NA	NA	NA
MIG2_differenceOfMax_Plus_AboveCutOff	-1.54614	34.6038	0.347416	0.980515
MIG3_differenceOfMax_Plus_AboveCutOff	NA	NA	NA	NA
NDT80_differenceOfMax_Plus_AboveCutOff	-0.238784	7.47644	0.645791	0.980515
NHP6A_differenceOfMax_Plus_AboveCutOff	0.024281	0.0418689	0.581465	0.797652
NHP6B_differenceOfMax_Plus_AboveCutOff	-0.379261	10.3013	0.428288	0.980515
OAF1_differenceOfMax_Plus_AboveCutOff	-0.371166	9.82739	0.395001	0.980515
PHO2_differenceOfMax_Plus_AboveCutOff	-0.0632312	0.0679993	0.277908	0.561298
RDR1_differenceOfMax_Plus_AboveCutOff	NA	NA	NA	NA
RDS1_differenceOfMax_Plus_AboveCutOff	NA	NA	NA	NA
SFL1_differenceOfMax_Plus_AboveCutOff	-0.0131019	0.0540062	0.80183	0.980515
SFP1_differenceOfMax_Plus_AboveCutOff	0.114406	0.0330176	0.00168127	0.0113405
SRD1_differenceOfMax_Plus_AboveCutOff	NA	NA	NA	NA
STB3_differenceOfMax_Plus_AboveCutOff	NA	NA	NA	NA
STP2_differenceOfMax_Plus_AboveCutOff	0.061321	0.0405225	0.157349	0.259032
SUT2_differenceOfMax_Plus_AboveCutOff	NA	NA	NA	NA
TBF1_differenceOfMax_Plus_AboveCutOff	0.0272663	0.0324108	0.444474	0.619134
TBS1_differenceOfMax_Plus_AboveCutOff	-0.130567	4.0714	0.639118	0.980515
TEA1_differenceOfMax_Plus_AboveCutOff	NA	NA	NA	NA
TOD6_differenceOfMax_Plus_AboveCutOff	0.0547204	0.0308676	0.108021	0.181317
YKL222C_differenceOfMax_Plus_AboveCutOff	-5.21568	133.168	0.272753	0.980515
YLL054C_differenceOfMax_Plus_AboveCutOff	NA	NA	NA	NA
YPR013C_differenceOfMax_Plus_AboveCutOff	0.0358226	0.0251598	0.19052	0.292552
YPR015C_differenceOfMax_Plus_AboveCutOff	NA	NA	NA	NA
YRM1_differenceOfMax_Plus_AboveCutOff	NA	NA	NA	NA
ABF2_differenceOfMeans_Plus_AboveCutOff	0.0458748	0.0440358	0.341672	0.491542
CAT8_differenceOfMeans_Plus_AboveCutOff	-0.00742017	0.056634	0.893847	0.980515
CST6_differenceOfMeans_Plus_AboveCutOff	0.0255377	0.0482046	0.609409	0.833903
ECM23_differenceOfMeans_Plus_AboveCutOff	0.00845376	0.0483833	0.86277	0.980515
EDS1_differenceOfMeans_Plus_AboveCutOff	NA	NA	NA	NA
FKH2_differenceOfMeans_Plus_AboveCutOff	-0.379308	7.93083	0.288204	0.980515
FZF1_differenceOfMeans_Plus_AboveCutOff	-0.0273972	0.062137	0.637351	0.890465
GIS1_differenceOfMeans_Plus_AboveCutOff	0.0749528	0.0320516	0.0331699	0.0736967
GSM1_differenceOfMeans_Plus_AboveCutOff	0.027336	0.0489646	0.588167	0.813581
GZF3_differenceOfMeans_Plus_AboveCutOff	0.0515464	0.0418584	0.241313	0.383435
HCM1_differenceOfMeans_Plus_AboveCutOff	-0.0233388	0.0561366	0.670373	0.908591
HMRA2_differenceOfMeans_Plus_AboveCutOff	0.0180203	0.0436824	0.691347	0.910812
NHP10_differenceOfMeans_Plus_AboveCutOff	-0.192808	5.95654	0.623395	0.980515
PDR8_differenceOfMeans_Plus_AboveCutOff	-0.0561067	0.0618934	0.315076	0.576541
REB1_differenceOfMeans_Plus_AboveCutOff	-3.25372	75.2047	0.400928	0.980515
REI1_differenceOfMeans_Plus_AboveCutOff	0.053565	0.0315313	0.12242	0.199808
RSC30_differenceOfMeans_Plus_AboveCutOff	0.0543078	0.0393471	0.209752	0.310759
RSC3_differenceOfMeans_Plus_AboveCutOff	0.0260136	0.0409603	0.543592	0.761081
RSF2_differenceOfMeans_Plus_AboveCutOff	0.0938199	0.0280786	0.0014243	0.0138751
STE12_differenceOfMeans_Plus_AboveCutOff	0.00409154	0.0499018	0.935418	0.980515
STP3_differenceOfMeans_Plus_AboveCutOff	0.0376176	0.0389022	0.366828	0.537589
STP4_differenceOfMeans_Plus_AboveCutOff	-0.00402736	0.0501432	0.935464	0.980515
SWI5_differenceOfMeans_Plus_AboveCutOff	0.0402711	0.0380648	0.323534	0.482401
TOS8_differenceOfMeans_Plus_AboveCutOff	0.0108437	0.0477843	0.822823	0.980515
USV1_differenceOfMeans_Plus_AboveCutOff	0.0846601	0.0377847	0.0383009	0.0861414
YER130C_differenceOfMeans_Plus_AboveCutOff	0.0695952	0.0312997	0.0442799	0.0886145
YER184C_differenceOfMeans_Plus_AboveCutOff	-0.013014	0.055362	0.811492	0.980515
YLR278C_differenceOfMeans_Plus_AboveCutOff	-0.0656849	0.0765367	0.328037	0.607454
YNR063W_differenceOfMeans_Plus_AboveCutOff	-0.628359	14.3519	0.148858	0.980515
YOX1_differenceOfMeans_Plus_AboveCutOff	-0.0123659	0.0527299	0.811558	0.980515
YPR022C_differenceOfMeans_Plus_AboveCutOff	-0.0112836	0.0487533	0.812855	0.980515
YPR196W_differenceOfMeans_Plus_AboveCutOff	0.0529718	0.0405219	0.21414	0.344329
ACA1_differenceOfMeans_Plus_AboveCutOff	NA	NA	NA	NA
ADR1_differenceOfMeans_Plus_AboveCutOff	NA	NA	NA	NA
AFT1_differenceOfMeans_Plus_AboveCutOff	-0.183478	5.75738	0.649327	0.980515
DAL81_differenceOfMeans_Plus_AboveCutOff	NA	NA	NA	NA
DAL82_differenceOfMeans_Plus_AboveCutOff	-0.226316	4.99221	0.508562	0.980515
DIG1_differenceOfMeans_Plus_AboveCutOff	NA	NA	NA	NA
FKH1_differenceOfMeans_Plus_AboveCutOff	-0.508312	14.3735	0.259346	0.980515
MIG1_differenceOfMeans_Plus_AboveCutOff	-0.130361	4.0714	0.641673	0.980515
OPI1_differenceOfMeans_Plus_AboveCutOff	-0.366016	8.37652	0.358918	0.980515
PIP2_differenceOfMeans_Plus_AboveCutOff	NA	NA	NA	NA
PPR1_differenceOfMeans_Plus_AboveCutOff	-0.126517	4.0714	0.687729	0.980515
RGM1_differenceOfMeans_Plus_AboveCutOff	NA	NA	NA	NA
RTG1_differenceOfMeans_Plus_AboveCutOff	NA	NA	NA	NA
SKN7_differenceOfMeans_Plus_AboveCutOff	-0.233312	7.25635	0.634755	0.980515
UPC2_differenceOfMeans_Plus_AboveCutOff	-0.129679	4.0714	0.650194	0.980515
WAR1_differenceOfMeans_Plus_AboveCutOff	NA	NA	NA	NA
XBP1_differenceOfMeans_Plus_AboveCutOff	-6.43137	196.425	0.176618	0.980515
AFT2_differenceOfMeans_Plus_AboveCutOff	0.0481992	0.0347067	0.206029	0.307677
MATA2_differenceOfMeans_Plus_AboveCutOff	0.100911	0.0386333	0.0161758	0.0466388
MSN1_differenceOfMeans_Plus_AboveCutOff	0.0494727	0.0312808	0.150394	0.235856
NRG2_differenceOfMeans_Plus_AboveCutOff	0.0480263	0.0393374	0.266115	0.389104
ROX1_differenceOfMeans_Plus_AboveCutOff	0.0316147	0.0461748	0.509497	0.720615
DAL80_differenceOfMeans_Plus_AboveCutOff	0.0013978	0.05119	0.97825	0.982378
GLN3_differenceOfMeans_Plus_AboveCutOff	-0.0071253	0.0467674	0.87636	0.980515
HAP4_differenceOfMeans_Plus_AboveCutOff	-0.128775	4.0714	0.661255	0.980515
MET4_differenceOfMeans_Plus_AboveCutOff	NA	NA	NA	NA
MOT2_differenceOfMeans_Plus_AboveCutOff	0.0101097	0.0467239	0.833735	0.980515
MSN2_differenceOfMeans_Plus_AboveCutOff	0.0211966	0.0403268	0.621595	0.835339
MSN4_differenceOfMeans_Plus_AboveCutOff	0.037901	0.055074	0.525253	0.718599
NDD1_differenceOfMeans_Plus_AboveCutOff	0.0156964	0.0342345	0.663524	0.880671
RIM101_differenceOfMeans_Plus_AboveCutOff	-0.250779	6.70446	0.386194	0.980515
SOK2_differenceOfMeans_Plus_AboveCutOff	0.107283	0.0285533	0.000583943	0.00641666
SPT23_differenceOfMeans_Plus_AboveCutOff	0.0931867	0.0369635	0.0228984	0.0555302
SPT2_differenceOfMeans_Plus_AboveCutOff	0.0864681	0.04722	0.0631085	0.164541
STB1_differenceOfMeans_Plus_AboveCutOff	0.0208476	0.031155	0.535448	0.733342
STB5_differenceOfMeans_Plus_AboveCutOff	-0.0114934	0.0507698	0.815801	0.980515
SUT1_differenceOfMeans_Plus_AboveCutOff	0.0561739	0.033336	0.124513	0.203673
THO2_differenceOfMeans_Plus_AboveCutOff	-7.46634	191.914	0.0547157	0.980515
UME1_differenceOfMeans_Plus_AboveCutOff	-0.193454	5.75738	0.554529	0.980515
ZAP1_differenceOfMeans_Plus_AboveCutOff	NA	NA	NA	NA
ABF1_differenceOfMeans_Plus_AboveCutOff	0.477058	9.44712	0.000357916	0.980515
ACE2_differenceOfMeans_Plus_AboveCutOff	0.0773806	0.0323068	0.0280683	0.0666539
ARG81_differenceOfMeans_Plus_AboveCutOff	0.0630637	0.0360401	0.104719	0.186166
ASH1_differenceOfMeans_Plus_AboveCutOff	-0.0881573	0.0713759	0.152733	0.381548
AZF1_differenceOfMeans_Plus_AboveCutOff	NA	NA	NA	NA
CBF1_differenceOfMeans_Plus_AboveCutOff	-0.13145	4.09458	0.637315	0.980515
GAL4_differenceOfMeans_Plus_AboveCutOff	NA	NA	NA	NA
GAT3_differenceOfMeans_Plus_AboveCutOff	-0.0143879	0.0541489	0.785755	0.980515
GCR2_differenceOfMeans_Plus_AboveCutOff	-0.712557	14.0198	0.089598	0.980515
GTS1_differenceOfMeans_Plus_AboveCutOff	0.0291419	0.0273488	0.338451	0.478276
HAC1_differenceOfMeans_Plus_AboveCutOff	NA	NA	NA	NA
HAP2_differenceOfMeans_Plus_AboveCutOff	0.0925763	0.0282774	0.000666595	0.0147703
IME1_differenceOfMeans_Plus_AboveCutOff	-0.131947	4.0714	0.621333	0.980515
IXR1_differenceOfMeans_Plus_AboveCutOff	NA	NA	NA	NA
JHD1_differenceOfMeans_Plus_AboveCutOff	-0.00336889	0.0478954	0.943374	0.980515
MATA1_differenceOfMeans_Plus_AboveCutOff	0.0604258	0.0264287	0.0225191	0.0792165
MET32_differenceOfMeans_Plus_AboveCutOff	NA	NA	NA	NA
MOT3_differenceOfMeans_Plus_AboveCutOff	0.0696319	0.0325455	0.0501244	0.0996364
PDR1_differenceOfMeans_Plus_AboveCutOff	-0.130502	4.0714	0.639891	0.980515
RFX1_differenceOfMeans_Plus_AboveCutOff	0.184184	4.0714	0.0345124	0.980515
RGT1_differenceOfMeans_Plus_AboveCutOff	NA	NA	NA	NA
RME1_differenceOfMeans_Plus_AboveCutOff	0.0700233	0.0318256	0.0456148	0.0915559
RTG3_differenceOfMeans_Plus_AboveCutOff	-0.220525	4.867	0.509191	0.980515
SKO1_differenceOfMeans_Plus_AboveCutOff	NA	NA	NA	NA
SNF1_differenceOfMeans_Plus_AboveCutOff	NA	NA	NA	NA
SNT2_differenceOfMeans_Plus_AboveCutOff	NA	NA	NA	NA
STB2_differenceOfMeans_Plus_AboveCutOff	0.0757804	0.0391024	0.0796939	0.138131
STP1_differenceOfMeans_Plus_AboveCutOff	-0.232906	5.02199	0.464137	0.980515
SWI4_differenceOfMeans_Plus_AboveCutOff	0.0907133	0.0294336	0.00360869	0.0202112
SWI6_differenceOfMeans_Plus_AboveCutOff	0.0700995	0.0297247	0.0295943	0.0716708
THI2_differenceOfMeans_Plus_AboveCutOff	0.556956	11.8824	0.00380613	0.980515
URC2_differenceOfMeans_Plus_AboveCutOff	NA	NA	NA	NA
YHP1_differenceOfMeans_Plus_AboveCutOff	-0.0528452	0.0668188	0.370307	0.649405
YRR1_differenceOfMeans_Plus_AboveCutOff	NA	NA	NA	NA
ARG80_differenceOfMeans_Plus_AboveCutOff	-3.48736	80.4434	0.335902	0.980515
ARO80_differenceOfMeans_Plus_AboveCutOff	NA	NA	NA	NA
ARR1_differenceOfMeans_Plus_AboveCutOff	-0.526263	11.1346	0.110406	0.980515
CHA4_differenceOfMeans_Plus_AboveCutOff	-0.17987	5.79224	0.688698	0.980515
CUP9_differenceOfMeans_Plus_AboveCutOff	NA	NA	NA	NA
HMS1_differenceOfMeans_Plus_AboveCutOff	-0.0225248	0.0520303	0.657104	0.89493
INO2_differenceOfMeans_Plus_AboveCutOff	0.0173087	0.0363127	0.652774	0.870219
MCM1_differenceOfMeans_Plus_AboveCutOff	-0.295028	6.70667	0.291536	0.980515
MET28_differenceOfMeans_Plus_AboveCutOff	-0.363331	8.42125	0.334806	0.980515
MGA1_differenceOfMeans_Plus_AboveCutOff	0.0354782	0.0427362	0.430837	0.624336
PDR3_differenceOfMeans_Plus_AboveCutOff	0.0371261	0.0391898	0.387814	0.550052
PHO4_differenceOfMeans_Plus_AboveCutOff	NA	NA	NA	NA
PUT3_differenceOfMeans_Plus_AboveCutOff	NA	NA	NA	NA
RAP1_differenceOfMeans_Plus_AboveCutOff	-3.74407	113.226	0.204976	0.980515
SMP1_differenceOfMeans_Plus_AboveCutOff	0.0187157	0.0402668	0.652179	0.876361
UGA3_differenceOfMeans_Plus_AboveCutOff	-0.323914	6.72388	0.275108	0.980515
YAP3_differenceOfMeans_Plus_AboveCutOff	0.0455692	0.0416452	0.294661	0.462244
YAP5_differenceOfMeans_Plus_AboveCutOff	-0.129245	4.0714	0.655534	0.980515
CUP2_differenceOfMeans_Plus_AboveCutOff	NA	NA	NA	NA
GAL80_differenceOfMeans_Plus_AboveCutOff	NA	NA	NA	NA
HAP5_differenceOfMeans_Plus_AboveCutOff	-1.9457	46.5725	0.406956	0.980515
HSF1_differenceOfMeans_Plus_AboveCutOff	0.0380432	0.0252187	0.163304	0.260828
INO4_differenceOfMeans_Plus_AboveCutOff	-1.32041	31.065	0.506409	0.980515
MATALPHA2_differenceOfMeans_Plus_AboveCutOff	-0.275979	5.97906	0.540379	0.980515
ORC1_differenceOfMeans_Plus_AboveCutOff	0.043721	0.031472	0.206131	0.307677
SPT15_differenceOfMeans_Plus_AboveCutOff	0.0549456	0.0321988	0.119055	0.198722
STB4_differenceOfMeans_Plus_AboveCutOff	NA	NA	NA	NA
SUM1_differenceOfMeans_Plus_AboveCutOff	0.0375922	0.0251177	0.169891	0.264191
UME6_differenceOfMeans_Plus_AboveCutOff	0.18498	4.0714	0.0322357	0.980515
YAP1_differenceOfMeans_Plus_AboveCutOff	NA	NA	NA	NA
YDR026C_differenceOfMeans_Plus_AboveCutOff	-0.179519	5.41747	0.581236	0.980515
BAS1_differenceOfMeans_Plus_AboveCutOff	-0.237802	7.25207	0.600574	0.980515
CAD1_differenceOfMeans_Plus_AboveCutOff	NA	NA	NA	NA
CIN5_differenceOfMeans_Plus_AboveCutOff	0.094518	0.0287396	0.00239776	0.014621
CRZ1_differenceOfMeans_Plus_AboveCutOff	0.0979187	0.0355483	0.0125521	0.0374906
ERT1_differenceOfMeans_Plus_AboveCutOff	-0.940347	22.1765	0.0347416	0.980515
GCN4_differenceOfMeans_Plus_AboveCutOff	0.0446377	0.028373	0.151445	0.238104
GCR1_differenceOfMeans_Plus_AboveCutOff	-0.183	5.61843	0.612557	0.980515
HAP1_differenceOfMeans_Plus_AboveCutOff	0.0381978	0.0297326	0.248893	0.355352
HAP3_differenceOfMeans_Plus_AboveCutOff	-0.174557	5.461	0.644459	0.980515
LEU3_differenceOfMeans_Plus_AboveCutOff	NA	NA	NA	NA
MAC1_differenceOfMeans_Plus_AboveCutOff	0.0222608	0.0377476	0.582492	0.791736
MBP1_differenceOfMeans_Plus_AboveCutOff	0.00281112	0.0429616	0.948241	0.980515
MET31_differenceOfMeans_Plus_AboveCutOff	NA	NA	NA	NA
NRG1_differenceOfMeans_Plus_AboveCutOff	0.0631747	0.0348033	0.0975959	0.168763
PHD1_differenceOfMeans_Plus_AboveCutOff	0.0877912	0.0360718	0.0256851	0.0629368
RLM1_differenceOfMeans_Plus_AboveCutOff	0.0631674	0.0344517	0.0980469	0.164541
RPH1_differenceOfMeans_Plus_AboveCutOff	0.0431949	0.036224	0.26542	0.404069
RPN4_differenceOfMeans_Plus_AboveCutOff	NA	NA	NA	NA
SIP4_differenceOfMeans_Plus_AboveCutOff	NA	NA	NA	NA
TEC1_differenceOfMeans_Plus_AboveCutOff	0.022582	0.0453222	0.63872	0.855354
TYE7_differenceOfMeans_Plus_AboveCutOff	0.0655866	0.0328857	0.0686362	0.125464
YAP6_differenceOfMeans_Plus_AboveCutOff	0.0740205	0.0351249	0.055317	0.105303
YAP7_differenceOfMeans_Plus_AboveCutOff	0.0184279	0.0359566	0.62985	0.844912
RDS2_differenceOfMeans_Plus_AboveCutOff	0.120949	0.0374142	0.00286752	0.0160732
YGR067C_differenceOfMeans_Plus_AboveCutOff	-0.0302504	0.0546706	0.570072	0.816578
YML081W_differenceOfMeans_Plus_AboveCutOff	0.106953	0.0368845	0.00671715	0.0289482
ASG1_differenceOfMeans_Plus_AboveCutOff	-0.226703	4.8771	0.457434	0.980515
CEP3_differenceOfMeans_Plus_AboveCutOff	NA	NA	NA	NA
DOT6_differenceOfMeans_Plus_AboveCutOff	0.0343819	0.041119	0.432734	0.622095
ECM22_differenceOfMeans_Plus_AboveCutOff	-0.17677	5.41221	0.60768	0.980515
FHL1_differenceOfMeans_Plus_AboveCutOff	0.045774	0.0406871	0.288302	0.443291
GAT1_differenceOfMeans_Plus_AboveCutOff	0.0729214	0.0314647	0.0211784	0.0754805
GAT4_differenceOfMeans_Plus_AboveCutOff	-0.182188	4.07114	0.534618	0.980515
HAL9_differenceOfMeans_Plus_AboveCutOff	0.0538444	0.0326386	0.133469	0.215067
LYS14_differenceOfMeans_Plus_AboveCutOff	NA	NA	NA	NA
MIG2_differenceOfMeans_Plus_AboveCutOff	-1.54614	34.6038	0.347416	0.980515
MIG3_differenceOfMeans_Plus_AboveCutOff	NA	NA	NA	NA
NDT80_differenceOfMeans_Plus_AboveCutOff	-0.238784	7.47644	0.645791	0.980515
NHP6A_differenceOfMeans_Plus_AboveCutOff	0.0247318	0.0417771	0.573937	0.791308
NHP6B_differenceOfMeans_Plus_AboveCutOff	-0.379766	10.3139	0.428288	0.980515
OAF1_differenceOfMeans_Plus_AboveCutOff	-0.371166	9.82739	0.395001	0.980515
PHO2_differenceOfMeans_Plus_AboveCutOff	-0.0632312	0.0679993	0.277908	0.561298
RDR1_differenceOfMeans_Plus_AboveCutOff	NA	NA	NA	NA
RDS1_differenceOfMeans_Plus_AboveCutOff	NA	NA	NA	NA
SFL1_differenceOfMeans_Plus_AboveCutOff	-0.0131019	0.0540062	0.80183	0.980515
SFP1_differenceOfMeans_Plus_AboveCutOff	0.114502	0.032869	0.00159457	0.0111912
SRD1_differenceOfMeans_Plus_AboveCutOff	NA	NA	NA	NA
STB3_differenceOfMeans_Plus_AboveCutOff	NA	NA	NA	NA
STP2_differenceOfMeans_Plus_AboveCutOff	0.061321	0.0405225	0.157349	0.259032
SUT2_differenceOfMeans_Plus_AboveCutOff	NA	NA	NA	NA
TBF1_differenceOfMeans_Plus_AboveCutOff	0.0272663	0.0324108	0.444474	0.619134
TBS1_differenceOfMeans_Plus_AboveCutOff	-0.130567	4.0714	0.639118	0.980515
TEA1_differenceOfMeans_Plus_AboveCutOff	NA	NA	NA	NA
TOD6_differenceOfMeans_Plus_AboveCutOff	0.0547204	0.0308676	0.108021	0.181317
YKL222C_differenceOfMeans_Plus_AboveCutOff	-5.21568	133.168	0.272753	0.980515
YLL054C_differenceOfMeans_Plus_AboveCutOff	NA	NA	NA	NA
YPR013C_differenceOfMeans_Plus_AboveCutOff	0.0358226	0.0251598	0.19052	0.292552
YPR015C_differenceOfMeans_Plus_AboveCutOff	NA	NA	NA	NA
YRM1_differenceOfMeans_Plus_AboveCutOff	NA	NA	NA	NA
ABF2_deltaSignificantBindingSites_Plus_AboveCutOff	0.0552737	0.0410714	0.223626	0.324716
CAT8_deltaSignificantBindingSites_Plus_AboveCutOff	-0.00705599	0.0560977	0.898151	0.980515
CST6_deltaSignificantBindingSites_Plus_AboveCutOff	0.0222575	0.0477329	0.650959	0.875362
ECM23_deltaSignificantBindingSites_Plus_AboveCutOff	0.0123425	0.047593	0.798423	0.980515
EDS1_deltaSignificantBindingSites_Plus_AboveCutOff	NA	NA	NA	NA
FKH2_deltaSignificantBindingSites_Plus_AboveCutOff	-0.379308	7.93083	0.288204	0.980515
FZF1_deltaSignificantBindingSites_Plus_AboveCutOff	-0.0273972	0.062137	0.637351	0.890465
GIS1_deltaSignificantBindingSites_Plus_AboveCutOff	0.0776113	0.0318463	0.0265484	0.0628104
GSM1_deltaSignificantBindingSites_Plus_AboveCutOff	0.0112498	0.0518426	0.830677	0.980515
GZF3_deltaSignificantBindingSites_Plus_AboveCutOff	0.0440869	0.0429683	0.325339	0.501875
HCM1_deltaSignificantBindingSites_Plus_AboveCutOff	-0.00431035	0.0523627	0.934125	0.980515
HMRA2_deltaSignificantBindingSites_Plus_AboveCutOff	0.0234174	0.0425284	0.599493	0.817856
NHP10_deltaSignificantBindingSites_Plus_AboveCutOff	-0.186361	5.75738	0.623395	0.980515
PDR8_deltaSignificantBindingSites_Plus_AboveCutOff	-0.0573878	0.0619247	0.305476	0.563205
REB1_deltaSignificantBindingSites_Plus_AboveCutOff	NA	NA	NA	NA
REI1_deltaSignificantBindingSites_Plus_AboveCutOff	0.0537544	0.0303631	0.106595	0.181586
RSC30_deltaSignificantBindingSites_Plus_AboveCutOff	0.0543078	0.0393471	0.209752	0.310759
RSC3_deltaSignificantBindingSites_Plus_AboveCutOff	0.0384933	0.0395072	0.362203	0.5339
RSF2_deltaSignificantBindingSites_Plus_AboveCutOff	0.0924523	0.0280651	0.00171256	0.014621
STE12_deltaSignificantBindingSites_Plus_AboveCutOff	0.0085913	0.0483967	0.862356	0.980515
STP3_deltaSignificantBindingSites_Plus_AboveCutOff	0.0429088	0.0372421	0.285838	0.427672
STP4_deltaSignificantBindingSites_Plus_AboveCutOff	0.00272787	0.0480372	0.954964	0.980515
SWI5_deltaSignificantBindingSites_Plus_AboveCutOff	0.0321079	0.0399707	0.447399	0.64337
TOS8_deltaSignificantBindingSites_Plus_AboveCutOff	0.00528561	0.0491425	0.914903	0.980515
USV1_deltaSignificantBindingSites_Plus_AboveCutOff	0.0905185	0.0357965	0.0203858	0.0547342
YER130C_deltaSignificantBindingSites_Plus_AboveCutOff	0.0676349	0.0312226	0.0502616	0.0957918
YER184C_deltaSignificantBindingSites_Plus_AboveCutOff	0.00177045	0.0518072	0.972791	0.980515
YLR278C_deltaSignificantBindingSites_Plus_AboveCutOff	-0.0618023	0.0738115	0.339178	0.622011
YNR063W_deltaSignificantBindingSites_Plus_AboveCutOff	-0.604781	14.2647	0.148858	0.980515
YOX1_deltaSignificantBindingSites_Plus_AboveCutOff	-0.0101704	0.0516703	0.841874	0.980515
YPR022C_deltaSignificantBindingSites_Plus_AboveCutOff	-0.0148049	0.0501505	0.761143	0.980515
YPR196W_deltaSignificantBindingSites_Plus_AboveCutOff	0.0539661	0.0408494	0.209113	0.337567
ACA1_deltaSignificantBindingSites_Plus_AboveCutOff	NA	NA	NA	NA
ADR1_deltaSignificantBindingSites_Plus_AboveCutOff	NA	NA	NA	NA
AFT1_deltaSignificantBindingSites_Plus_AboveCutOff	-0.183478	5.75738	0.649327	0.980515
DAL81_deltaSignificantBindingSites_Plus_AboveCutOff	NA	NA	NA	NA
DAL82_deltaSignificantBindingSites_Plus_AboveCutOff	-0.225944	4.98208	0.508562	0.980515
DIG1_deltaSignificantBindingSites_Plus_AboveCutOff	NA	NA	NA	NA
FKH1_deltaSignificantBindingSites_Plus_AboveCutOff	-0.450668	8.65273	0.259347	0.980515
MIG1_deltaSignificantBindingSites_Plus_AboveCutOff	-0.130361	4.0714	0.641673	0.980515
OPI1_deltaSignificantBindingSites_Plus_AboveCutOff	-0.348813	8.18746	0.358918	0.980515
PIP2_deltaSignificantBindingSites_Plus_AboveCutOff	NA	NA	NA	NA
PPR1_deltaSignificantBindingSites_Plus_AboveCutOff	-0.126517	4.0714	0.687729	0.980515
RGM1_deltaSignificantBindingSites_Plus_AboveCutOff	NA	NA	NA	NA
RTG1_deltaSignificantBindingSites_Plus_AboveCutOff	NA	NA	NA	NA
SKN7_deltaSignificantBindingSites_Plus_AboveCutOff	-0.226702	7.05077	0.634755	0.980515
UPC2_deltaSignificantBindingSites_Plus_AboveCutOff	-0.129679	4.0714	0.650194	0.980515
WAR1_deltaSignificantBindingSites_Plus_AboveCutOff	NA	NA	NA	NA
XBP1_deltaSignificantBindingSites_Plus_AboveCutOff	-0.379552	7.23098	0.242817	0.980515
AFT2_deltaSignificantBindingSites_Plus_AboveCutOff	0.0469416	0.0349375	0.220695	0.325636
MATA2_deltaSignificantBindingSites_Plus_AboveCutOff	0.10574	0.0374583	0.00952171	0.0337605
MSN1_deltaSignificantBindingSites_Plus_AboveCutOff	0.0515743	0.0307108	0.127753	0.205479
NRG2_deltaSignificantBindingSites_Plus_AboveCutOff	0.0482599	0.0383665	0.25223	0.370626
ROX1_deltaSignificantBindingSites_Plus_AboveCutOff	0.0394555	0.0452234	0.404015	0.598893
DAL80_deltaSignificantBindingSites_Plus_AboveCutOff	0.0013978	0.05119	0.97825	0.982378
GLN3_deltaSignificantBindingSites_Plus_AboveCutOff	-0.00912315	0.0474628	0.843439	0.980515
HAP4_deltaSignificantBindingSites_Plus_AboveCutOff	-0.128775	4.0714	0.661255	0.980515
MET4_deltaSignificantBindingSites_Plus_AboveCutOff	NA	NA	NA	NA
MOT2_deltaSignificantBindingSites_Plus_AboveCutOff	0.0147159	0.0449667	0.7537	0.980515
MSN2_deltaSignificantBindingSites_Plus_AboveCutOff	0.0095556	0.0411126	0.822919	0.980515
MSN4_deltaSignificantBindingSites_Plus_AboveCutOff	0.0373814	0.054319	0.525253	0.718599
NDD1_deltaSignificantBindingSites_Plus_AboveCutOff	0.00813848	0.0354041	0.824516	0.980515
RIM101_deltaSignificantBindingSites_Plus_AboveCutOff	-0.250779	6.70446	0.386194	0.980515
SOK2_deltaSignificantBindingSites_Plus_AboveCutOff	0.104052	0.0284186	0.00083205	0.007941
SPT23_deltaSignificantBindingSites_Plus_AboveCutOff	0.103746	0.0379083	0.0138554	0.0387602
SPT2_deltaSignificantBindingSites_Plus_AboveCutOff	0.0612566	0.0435494	0.189569	0.300349
STB1_deltaSignificantBindingSites_Plus_AboveCutOff	0.0201653	0.0314019	0.551102	0.754832
STB5_deltaSignificantBindingSites_Plus_AboveCutOff	-0.0288404	0.0583693	0.590369	0.857376
SUT1_deltaSignificantBindingSites_Plus_AboveCutOff	0.0541923	0.0344504	0.153897	0.238104
THO2_deltaSignificantBindingSites_Plus_AboveCutOff	-0.693005	13.1948	0.0845649	0.980515
UME1_deltaSignificantBindingSites_Plus_AboveCutOff	-0.193454	5.75738	0.554529	0.980515
ZAP1_deltaSignificantBindingSites_Plus_AboveCutOff	NA	NA	NA	NA
ABF1_deltaSignificantBindingSites_Plus_AboveCutOff	0.477964	9.48054	0.000357916	0.980515
ACE2_deltaSignificantBindingSites_Plus_AboveCutOff	0.0758217	0.0318618	0.030355	0.0687757
ARG81_deltaSignificantBindingSites_Plus_AboveCutOff	0.0536843	0.036681	0.171936	0.276594
ASH1_deltaSignificantBindingSites_Plus_AboveCutOff	-0.110615	0.0782213	0.0929449	0.297031
AZF1_deltaSignificantBindingSites_Plus_AboveCutOff	NA	NA	NA	NA
CBF1_deltaSignificantBindingSites_Plus_AboveCutOff	-0.130706	4.0714	0.637315	0.980515
GAL4_deltaSignificantBindingSites_Plus_AboveCutOff	NA	NA	NA	NA
GAT3_deltaSignificantBindingSites_Plus_AboveCutOff	-0.00511968	0.0518721	0.920766	0.980515
GCR2_deltaSignificantBindingSites_Plus_AboveCutOff	-0.712557	14.0198	0.089598	0.980515
GTS1_deltaSignificantBindingSites_Plus_AboveCutOff	0.0325446	0.0266726	0.27414	0.389324
HAC1_deltaSignificantBindingSites_Plus_AboveCutOff	NA	NA	NA	NA
HAP2_deltaSignificantBindingSites_Plus_AboveCutOff	0.0869695	0.0267114	0.00105182	0.0153634
IME1_deltaSignificantBindingSites_Plus_AboveCutOff	-0.131947	4.0714	0.621333	0.980515
IXR1_deltaSignificantBindingSites_Plus_AboveCutOff	NA	NA	NA	NA
JHD1_deltaSignificantBindingSites_Plus_AboveCutOff	-0.00271251	0.0477282	0.954324	0.980515
MATA1_deltaSignificantBindingSites_Plus_AboveCutOff	0.0614301	0.0266686	0.0204821	0.0769559
MET32_deltaSignificantBindingSites_Plus_AboveCutOff	NA	NA	NA	NA
MOT3_deltaSignificantBindingSites_Plus_AboveCutOff	0.071143	0.0344757	0.0602434	0.113418
PDR1_deltaSignificantBindingSites_Plus_AboveCutOff	NA	NA	NA	NA
RFX1_deltaSignificantBindingSites_Plus_AboveCutOff	0.184184	4.0714	0.0345124	0.980515
RGT1_deltaSignificantBindingSites_Plus_AboveCutOff	NA	NA	NA	NA
RME1_deltaSignificantBindingSites_Plus_AboveCutOff	0.0708557	0.0318278	0.0434813	0.0885213
RTG3_deltaSignificantBindingSites_Plus_AboveCutOff	-0.225898	4.9856	0.509191	0.980515
SKO1_deltaSignificantBindingSites_Plus_AboveCutOff	NA	NA	NA	NA
SNF1_deltaSignificantBindingSites_Plus_AboveCutOff	NA	NA	NA	NA
SNT2_deltaSignificantBindingSites_Plus_AboveCutOff	NA	NA	NA	NA
STB2_deltaSignificantBindingSites_Plus_AboveCutOff	0.0768269	0.0397691	0.0799794	0.139673
STP1_deltaSignificantBindingSites_Plus_AboveCutOff	-0.230612	4.97346	0.464137	0.980515
SWI4_deltaSignificantBindingSites_Plus_AboveCutOff	0.0873529	0.0295758	0.00614704	0.0261404
SWI6_deltaSignificantBindingSites_Plus_AboveCutOff	0.0696743	0.0295436	0.0301043	0.0716708
THI2_deltaSignificantBindingSites_Plus_AboveCutOff	NA	NA	NA	NA
URC2_deltaSignificantBindingSites_Plus_AboveCutOff	NA	NA	NA	NA
YHP1_deltaSignificantBindingSites_Plus_AboveCutOff	-0.0528452	0.0668188	0.370307	0.649405
YRR1_deltaSignificantBindingSites_Plus_AboveCutOff	NA	NA	NA	NA
ARG80_deltaSignificantBindingSites_Plus_AboveCutOff	-0.320116	8.64316	0.414219	0.980515
ARO80_deltaSignificantBindingSites_Plus_AboveCutOff	NA	NA	NA	NA
ARR1_deltaSignificantBindingSites_Plus_AboveCutOff	-0.518038	11.0385	0.110406	0.980515
CHA4_deltaSignificantBindingSites_Plus_AboveCutOff	-0.178788	5.75738	0.688698	0.980515
CUP9_deltaSignificantBindingSites_Plus_AboveCutOff	NA	NA	NA	NA
HMS1_deltaSignificantBindingSites_Plus_AboveCutOff	0.00911546	0.0485046	0.852376	0.980515
INO2_deltaSignificantBindingSites_Plus_AboveCutOff	0.0189835	0.0344016	0.604616	0.817151
MCM1_deltaSignificantBindingSites_Plus_AboveCutOff	-0.29225	6.67108	0.291536	0.980515
MET28_deltaSignificantBindingSites_Plus_AboveCutOff	-0.351954	8.16229	0.334806	0.980515
MGA1_deltaSignificantBindingSites_Plus_AboveCutOff	0.0361061	0.0432514	0.428077	0.622905
PDR3_deltaSignificantBindingSites_Plus_AboveCutOff	0.0339019	0.0409955	0.448538	0.62601
PHO4_deltaSignificantBindingSites_Plus_AboveCutOff	NA	NA	NA	NA
PUT3_deltaSignificantBindingSites_Plus_AboveCutOff	NA	NA	NA	NA
RAP1_deltaSignificantBindingSites_Plus_AboveCutOff	-0.322356	8.64432	0.396571	0.980515
SMP1_deltaSignificantBindingSites_Plus_AboveCutOff	0.0374423	0.0369803	0.340262	0.511158
UGA3_deltaSignificantBindingSites_Plus_AboveCutOff	-0.322195	6.6968	0.275108	0.980515
YAP3_deltaSignificantBindingSites_Plus_AboveCutOff	0.0572324	0.0403824	0.178438	0.295727
YAP5_deltaSignificantBindingSites_Plus_AboveCutOff	-0.129245	4.0714	0.655534	0.980515
CUP2_deltaSignificantBindingSites_Plus_AboveCutOff	NA	NA	NA	NA
GAL80_deltaSignificantBindingSites_Plus_AboveCutOff	NA	NA	NA	NA
HAP5_deltaSignificantBindingSites_Plus_AboveCutOff	-0.260469	5.74833	0.511626	0.980515
HSF1_deltaSignificantBindingSites_Plus_AboveCutOff	0.0381361	0.0252265	0.162104	0.259596
INO4_deltaSignificantBindingSites_Plus_AboveCutOff	-0.229443	7.05077	0.614181	0.980515
MATALPHA2_deltaSignificantBindingSites_Plus_AboveCutOff	-0.25682	5.74922	0.540377	0.980515
ORC1_deltaSignificantBindingSites_Plus_AboveCutOff	0.0428858	0.0316975	0.217518	0.322104
SPT15_deltaSignificantBindingSites_Plus_AboveCutOff	0.0618475	0.0335817	0.0927824	0.163074
STB4_deltaSignificantBindingSites_Plus_AboveCutOff	NA	NA	NA	NA
SUM1_deltaSignificantBindingSites_Plus_AboveCutOff	0.0386805	0.0250982	0.155647	0.249046
UME6_deltaSignificantBindingSites_Plus_AboveCutOff	0.18498	4.0714	0.0322357	0.980515
YAP1_deltaSignificantBindingSites_Plus_AboveCutOff	NA	NA	NA	NA
YDR026C_deltaSignificantBindingSites_Plus_AboveCutOff	-0.190783	5.75738	0.581236	0.980515
BAS1_deltaSignificantBindingSites_Plus_AboveCutOff	-0.231201	7.05077	0.600574	0.980515
CAD1_deltaSignificantBindingSites_Plus_AboveCutOff	NA	NA	NA	NA
CIN5_deltaSignificantBindingSites_Plus_AboveCutOff	0.0968338	0.0287576	0.00183483	0.0135779
CRZ1_deltaSignificantBindingSites_Plus_AboveCutOff	0.105756	0.0356267	0.00722588	0.0255416
ERT1_deltaSignificantBindingSites_Plus_AboveCutOff	-0.88901	21.5177	0.0347415	0.980515
GCN4_deltaSignificantBindingSites_Plus_AboveCutOff	0.0376767	0.0298196	0.246546	0.367273
GCR1_deltaSignificantBindingSites_Plus_AboveCutOff	-0.187526	5.75738	0.612557	0.980515
HAP1_deltaSignificantBindingSites_Plus_AboveCutOff	0.0374288	0.0307452	0.275306	0.390636
HAP3_deltaSignificantBindingSites_Plus_AboveCutOff	-0.184031	5.75738	0.644459	0.980515
LEU3_deltaSignificantBindingSites_Plus_AboveCutOff	NA	NA	NA	NA
MAC1_deltaSignificantBindingSites_Plus_AboveCutOff	0.0204607	0.0389171	0.622172	0.835339
MBP1_deltaSignificantBindingSites_Plus_AboveCutOff	-0.00616412	0.0461673	0.891853	0.980515
MET31_deltaSignificantBindingSites_Plus_AboveCutOff	NA	NA	NA	NA
NRG1_deltaSignificantBindingSites_Plus_AboveCutOff	0.0607183	0.0344023	0.107596	0.182903
PHD1_deltaSignificantBindingSites_Plus_AboveCutOff	0.0929601	0.0360376	0.0182898	0.049799
RLM1_deltaSignificantBindingSites_Plus_AboveCutOff	0.0578069	0.0345483	0.131858	0.207601
RPH1_deltaSignificantBindingSites_Plus_AboveCutOff	0.0429758	0.035924	0.26389	0.402397
RPN4_deltaSignificantBindingSites_Plus_AboveCutOff	NA	NA	NA	NA
SIP4_deltaSignificantBindingSites_Plus_AboveCutOff	NA	NA	NA	NA
TEC1_deltaSignificantBindingSites_Plus_AboveCutOff	0.0146202	0.0471571	0.765686	0.980515
TYE7_deltaSignificantBindingSites_Plus_AboveCutOff	0.0631111	0.0344697	0.0963984	0.164541
YAP6_deltaSignificantBindingSites_Plus_AboveCutOff	0.0763974	0.0344887	0.0446089	0.089365
YAP7_deltaSignificantBindingSites_Plus_AboveCutOff	0.0172352	0.0363915	0.655048	0.871536
RDS2_deltaSignificantBindingSites_Plus_AboveCutOff	0.124718	0.0375328	0.00219323	0.0142758
YGR067C_deltaSignificantBindingSites_Plus_AboveCutOff	-0.0297227	0.0550118	0.579259	0.826947
YML081W_deltaSignificantBindingSites_Plus_AboveCutOff	0.0916204	0.0388061	0.0258803	0.0715833
ASG1_deltaSignificantBindingSites_Plus_AboveCutOff	-0.231376	4.98545	0.457434	0.980515
CEP3_deltaSignificantBindingSites_Plus_AboveCutOff	NA	NA	NA	NA
DOT6_deltaSignificantBindingSites_Plus_AboveCutOff	0.0194156	0.0439917	0.671516	0.890465
ECM22_deltaSignificantBindingSites_Plus_AboveCutOff	-0.188043	5.75738	0.60768	0.980515
FHL1_deltaSignificantBindingSites_Plus_AboveCutOff	0.0525029	0.0395364	0.212512	0.334376
GAT1_deltaSignificantBindingSites_Plus_AboveCutOff	0.0715596	0.0307537	0.0193845	0.0751437
GAT4_deltaSignificantBindingSites_Plus_AboveCutOff	-0.182183	4.07108	0.534618	0.980515
HAL9_deltaSignificantBindingSites_Plus_AboveCutOff	0.0581469	0.0324371	0.10284	0.175232
LYS14_deltaSignificantBindingSites_Plus_AboveCutOff	NA	NA	NA	NA
MIG2_deltaSignificantBindingSites_Plus_AboveCutOff	-0.286887	7.73335	0.409449	0.980515
MIG3_deltaSignificantBindingSites_Plus_AboveCutOff	NA	NA	NA	NA
NDT80_deltaSignificantBindingSites_Plus_AboveCutOff	-0.260005	8.14088	0.645791	0.980515
NHP6A_deltaSignificantBindingSites_Plus_AboveCutOff	0.0120587	0.0440449	0.79077	0.980515
NHP6B_deltaSignificantBindingSites_Plus_AboveCutOff	-0.413144	9.6548	0.42829	0.980515
OAF1_deltaSignificantBindingSites_Plus_AboveCutOff	-0.381665	10.2449	0.395001	0.980515
PHO2_deltaSignificantBindingSites_Plus_AboveCutOff	-0.058838	0.0655026	0.300169	0.583112
RDR1_deltaSignificantBindingSites_Plus_AboveCutOff	NA	NA	NA	NA
RDS1_deltaSignificantBindingSites_Plus_AboveCutOff	NA	NA	NA	NA
SFL1_deltaSignificantBindingSites_Plus_AboveCutOff	-0.0141388	0.0542275	0.786733	0.980515
SFP1_deltaSignificantBindingSites_Plus_AboveCutOff	0.0785264	0.0350837	0.0408758	0.0864334
SRD1_deltaSignificantBindingSites_Plus_AboveCutOff	NA	NA	NA	NA
STB3_deltaSignificantBindingSites_Plus_AboveCutOff	NA	NA	NA	NA
STP2_deltaSignificantBindingSites_Plus_AboveCutOff	0.0574634	0.039952	0.180546	0.286773
SUT2_deltaSignificantBindingSites_Plus_AboveCutOff	NA	NA	NA	NA
TBF1_deltaSignificantBindingSites_Plus_AboveCutOff	0.030541	0.0324399	0.394264	0.553834
TBS1_deltaSignificantBindingSites_Plus_AboveCutOff	-0.130567	4.0714	0.639118	0.980515
TEA1_deltaSignificantBindingSites_Plus_AboveCutOff	NA	NA	NA	NA
TOD6_deltaSignificantBindingSites_Plus_AboveCutOff	0.0510216	0.0307159	0.131491	0.210839
YKL222C_deltaSignificantBindingSites_Plus_AboveCutOff	-0.289452	7.73756	0.38692	0.980515
YLL054C_deltaSignificantBindingSites_Plus_AboveCutOff	NA	NA	NA	NA
YPR013C_deltaSignificantBindingSites_Plus_AboveCutOff	0.0375574	0.0250978	0.166312	0.264191
YPR015C_deltaSignificantBindingSites_Plus_AboveCutOff	NA	NA	NA	NA
YRM1_deltaSignificantBindingSites_Plus_AboveCutOff	NA	NA	NA	NA
metaChangeInNumberOfTFBS_Plus_AboveCutOff	0.284513	0.0415308	7.41532e-11	2.72652e-09
metaAverage_differenceOfMeans_Plus_AboveCutOff	0.286488	0.0409848	3.07268e-11	1.42615e-09
metaMax_differenceOfMeans_Plus_AboveCutOff	0.267149	0.0457967	1.01397e-08	1.20956e-06
metaAverage_differenceOfMax_Plus_AboveCutOff	0.285309	0.0410072	3.82341e-11	1.49823e-09
metaMax_differenceOfMax_Plus_AboveCutOff	0.266961	0.0458023	1.04218e-08	1.20956e-06
ABF2_differenceOfMax_Minus_AboveCutOff	-0.0229561	0.0670145	0.717873	0.968945
CAT8_differenceOfMax_Minus_AboveCutOff	-0.17832	0.24382	0.173961	0.688749
CST6_differenceOfMax_Minus_AboveCutOff	0.00244545	0.0557374	0.965157	0.980515
ECM23_differenceOfMax_Minus_AboveCutOff	-0.0610906	0.0673159	0.318947	0.57642
EDS1_differenceOfMax_Minus_AboveCutOff	NA	NA	NA	NA
FKH2_differenceOfMax_Minus_AboveCutOff	-0.384772	7.89845	0.25021	0.980515
FZF1_differenceOfMax_Minus_AboveCutOff	-0.00574141	0.0512334	0.909382	0.980515
GIS1_differenceOfMax_Minus_AboveCutOff	0.0644992	0.0405544	0.144456	0.233737
GSM1_differenceOfMax_Minus_AboveCutOff	0.0387385	0.0488214	0.446465	0.648624
GZF3_differenceOfMax_Minus_AboveCutOff	0.013321	0.0487287	0.787542	0.980515
HCM1_differenceOfMax_Minus_AboveCutOff	0.0604016	0.0431764	0.184545	0.304203
HMRA2_differenceOfMax_Minus_AboveCutOff	0.0426044	0.0352857	0.265486	0.396506
NHP10_differenceOfMax_Minus_AboveCutOff	0.00476705	0.0387094	0.903545	0.980515
PDR8_differenceOfMax_Minus_AboveCutOff	0.010838	0.0470471	0.820766	0.980515
REB1_differenceOfMax_Minus_AboveCutOff	-0.237481	5.09613	0.454059	0.980515
REI1_differenceOfMax_Minus_AboveCutOff	NA	NA	NA	NA
RSC30_differenceOfMax_Minus_AboveCutOff	-0.00618276	0.0481174	0.89598	0.980515
RSC3_differenceOfMax_Minus_AboveCutOff	0.0579501	0.0341776	0.117685	0.200664
RSF2_differenceOfMax_Minus_AboveCutOff	0.0543289	0.0357898	0.167021	0.257236
STE12_differenceOfMax_Minus_AboveCutOff	-4.04185	101.133	0.0764207	0.980515
STP3_differenceOfMax_Minus_AboveCutOff	0.0282048	0.0382349	0.484975	0.686181
STP4_differenceOfMax_Minus_AboveCutOff	0.0106401	0.0448926	0.816178	0.980515
SWI5_differenceOfMax_Minus_AboveCutOff	0.0326322	0.0393647	0.432848	0.624636
TOS8_differenceOfMax_Minus_AboveCutOff	-0.0269474	0.0542371	0.60811	0.855354
USV1_differenceOfMax_Minus_AboveCutOff	0.0706187	0.0384262	0.0863305	0.163798
YER130C_differenceOfMax_Minus_AboveCutOff	0.00581499	0.0514671	0.911381	0.980515
YER184C_differenceOfMax_Minus_AboveCutOff	0.124809	0.0380878	0.00276678	0.0147703
YLR278C_differenceOfMax_Minus_AboveCutOff	0.0359888	0.040989	0.40645	0.595603
YNR063W_differenceOfMax_Minus_AboveCutOff	0.00917636	0.0401483	0.824411	0.980515
YOX1_differenceOfMax_Minus_AboveCutOff	0.0335744	0.0456968	0.477877	0.687279
YPR022C_differenceOfMax_Minus_AboveCutOff	0.0398105	0.0397765	0.350037	0.517073
YPR196W_differenceOfMax_Minus_AboveCutOff	0.100073	0.0368592	0.012491	0.0401047
ACA1_differenceOfMax_Minus_AboveCutOff	NA	NA	NA	NA
ADR1_differenceOfMax_Minus_AboveCutOff	NA	NA	NA	NA
AFT1_differenceOfMax_Minus_AboveCutOff	-0.184923	5.73802	0.630843	0.980515
DAL81_differenceOfMax_Minus_AboveCutOff	-0.132661	4.0714	0.611891	0.980515
DAL82_differenceOfMax_Minus_AboveCutOff	NA	NA	NA	NA
DIG1_differenceOfMax_Minus_AboveCutOff	NA	NA	NA	NA
FKH1_differenceOfMax_Minus_AboveCutOff	0.00320745	0.0475137	0.946667	0.980515
MIG1_differenceOfMax_Minus_AboveCutOff	NA	NA	NA	NA
OPI1_differenceOfMax_Minus_AboveCutOff	-4.30101	94.6281	0.420504	0.980515
PIP2_differenceOfMax_Minus_AboveCutOff	-0.130598	4.0714	0.63872	0.980515
PPR1_differenceOfMax_Minus_AboveCutOff	NA	NA	NA	NA
RGM1_differenceOfMax_Minus_AboveCutOff	-0.134895	4.0714	0.581502	0.980515
RTG1_differenceOfMax_Minus_AboveCutOff	NA	NA	NA	NA
SKN7_differenceOfMax_Minus_AboveCutOff	-0.253293	6.74072	0.383237	0.980515
UPC2_differenceOfMax_Minus_AboveCutOff	NA	NA	NA	NA
WAR1_differenceOfMax_Minus_AboveCutOff	NA	NA	NA	NA
XBP1_differenceOfMax_Minus_AboveCutOff	-7.56949	208.288	0.154008	0.980515
AFT2_differenceOfMax_Minus_AboveCutOff	-0.407608	7.688	0.22775	0.980515
MATA2_differenceOfMax_Minus_AboveCutOff	0.0839884	0.0365915	0.0332033	0.0781897
MSN1_differenceOfMax_Minus_AboveCutOff	0.0548519	0.0279906	0.0749951	0.133225
NRG2_differenceOfMax_Minus_AboveCutOff	0.0457248	0.0337567	0.21814	0.321639
ROX1_differenceOfMax_Minus_AboveCutOff	0.100854	0.0378253	0.0143211	0.0430984
DAL80_differenceOfMax_Minus_AboveCutOff	0.0290663	0.047438	0.552962	0.775442
GLN3_differenceOfMax_Minus_AboveCutOff	0.045172	0.0348603	0.238689	0.350304
HAP4_differenceOfMax_Minus_AboveCutOff	-0.267782	5.83109	0.481908	0.980515
MET4_differenceOfMax_Minus_AboveCutOff	-0.136574	4.0714	0.557813	0.980515
MOT2_differenceOfMax_Minus_AboveCutOff	-3.93007	92.4291	0.352346	0.980515
MSN2_differenceOfMax_Minus_AboveCutOff	-3.43765	92.39	0.347564	0.980515
MSN4_differenceOfMax_Minus_AboveCutOff	0.0509173	0.0322244	0.149488	0.235992
NDD1_differenceOfMax_Minus_AboveCutOff	-3.27408	98.1433	0.437659	0.980515
RIM101_differenceOfMax_Minus_AboveCutOff	0.0769533	0.0280847	0.00810817	0.0387079
SOK2_differenceOfMax_Minus_AboveCutOff	0.0324676	0.0443342	0.486338	0.688649
SPT23_differenceOfMax_Minus_AboveCutOff	0.0333518	0.0423926	0.457539	0.651925
SPT2_differenceOfMax_Minus_AboveCutOff	0.0106664	0.0450607	0.818556	0.980515
STB1_differenceOfMax_Minus_AboveCutOff	-0.403911	8.36023	0.261696	0.980515
STB5_differenceOfMax_Minus_AboveCutOff	0.0612115	0.0264091	0.0349205	0.0754805
SUT1_differenceOfMax_Minus_AboveCutOff	0.0253291	0.0366698	0.522787	0.718599
THO2_differenceOfMax_Minus_AboveCutOff	0.024625	0.0424643	0.581413	0.797652
UME1_differenceOfMax_Minus_AboveCutOff	NA	NA	NA	NA
ZAP1_differenceOfMax_Minus_AboveCutOff	NA	NA	NA	NA
ABF1_differenceOfMax_Minus_AboveCutOff	0.185382	4.0714	0.0311751	0.980515
ACE2_differenceOfMax_Minus_AboveCutOff	0.0607313	0.0303517	0.0715978	0.124826
ARG81_differenceOfMax_Minus_AboveCutOff	0.103214	0.0329314	0.00424872	0.0194496
ASH1_differenceOfMax_Minus_AboveCutOff	-0.0514558	0.0585637	0.335782	0.595603
AZF1_differenceOfMax_Minus_AboveCutOff	NA	NA	NA	NA
CBF1_differenceOfMax_Minus_AboveCutOff	-0.153505	4.78159	0.637315	0.980515
GAL4_differenceOfMax_Minus_AboveCutOff	NA	NA	NA	NA
GAT3_differenceOfMax_Minus_AboveCutOff	-0.0261141	0.0591213	0.644065	0.890465
GCR2_differenceOfMax_Minus_AboveCutOff	-0.0152141	0.0654239	0.81001	0.980515
GTS1_differenceOfMax_Minus_AboveCutOff	0.0274179	0.0308673	0.417734	0.589779
HAC1_differenceOfMax_Minus_AboveCutOff	NA	NA	NA	NA
HAP2_differenceOfMax_Minus_AboveCutOff	0.0510902	0.0282058	0.10171	0.169256
IME1_differenceOfMax_Minus_AboveCutOff	-0.18002	5.70309	0.664392	0.980515
IXR1_differenceOfMax_Minus_AboveCutOff	NA	NA	NA	NA
JHD1_differenceOfMax_Minus_AboveCutOff	-0.460048	12.4904	0.432286	0.980515
MATA1_differenceOfMax_Minus_AboveCutOff	0.0227607	0.0372293	0.568534	0.77587
MET32_differenceOfMax_Minus_AboveCutOff	NA	NA	NA	NA
MOT3_differenceOfMax_Minus_AboveCutOff	-0.0074324	0.0531955	0.886725	0.980515
PDR1_differenceOfMax_Minus_AboveCutOff	-0.130502	4.0714	0.639891	0.980515
RFX1_differenceOfMax_Minus_AboveCutOff	NA	NA	NA	NA
RGT1_differenceOfMax_Minus_AboveCutOff	NA	NA	NA	NA
RME1_differenceOfMax_Minus_AboveCutOff	-0.0149972	0.0605742	0.797829	0.980515
RTG3_differenceOfMax_Minus_AboveCutOff	0.0415377	0.0381795	0.323804	0.465085
SKO1_differenceOfMax_Minus_AboveCutOff	NA	NA	NA	NA
SNF1_differenceOfMax_Minus_AboveCutOff	NA	NA	NA	NA
SNT2_differenceOfMax_Minus_AboveCutOff	NA	NA	NA	NA
STB2_differenceOfMax_Minus_AboveCutOff	0.0386491	0.0444666	0.414221	0.600974
STP1_differenceOfMax_Minus_AboveCutOff	0.372198	8.34126	0.0425122	0.980515
SWI4_differenceOfMax_Minus_AboveCutOff	0.0275206	0.0396817	0.520203	0.717172
SWI6_differenceOfMax_Minus_AboveCutOff	0.00200492	0.0424642	0.962568	0.980515
THI2_differenceOfMax_Minus_AboveCutOff	1.05446	23.615	0.0420669	0.980515
URC2_differenceOfMax_Minus_AboveCutOff	NA	NA	NA	NA
YHP1_differenceOfMax_Minus_AboveCutOff	0.000545692	0.0487343	0.991076	0.992213
YRR1_differenceOfMax_Minus_AboveCutOff	NA	NA	NA	NA
ARG80_differenceOfMax_Minus_AboveCutOff	-0.355397	9.44831	0.37629	0.980515
ARO80_differenceOfMax_Minus_AboveCutOff	NA	NA	NA	NA
ARR1_differenceOfMax_Minus_AboveCutOff	0.05879	0.0351867	0.128309	0.208018
CHA4_differenceOfMax_Minus_AboveCutOff	-0.251525	6.7288	0.390857	0.980515
CUP9_differenceOfMax_Minus_AboveCutOff	NA	NA	NA	NA
HMS1_differenceOfMax_Minus_AboveCutOff	0.0111679	0.045863	0.809823	0.980515
INO2_differenceOfMax_Minus_AboveCutOff	-0.352207	7.66732	0.480129	0.980515
MCM1_differenceOfMax_Minus_AboveCutOff	-0.134491	4.0714	0.587107	0.980515
MET28_differenceOfMax_Minus_AboveCutOff	0.0426154	0.0341801	0.260988	0.375483
MGA1_differenceOfMax_Minus_AboveCutOff	0.0132663	0.0475269	0.784608	0.980515
PDR3_differenceOfMax_Minus_AboveCutOff	0.0592288	0.0337325	0.106674	0.184367
PHO4_differenceOfMax_Minus_AboveCutOff	NA	NA	NA	NA
PUT3_differenceOfMax_Minus_AboveCutOff	NA	NA	NA	NA
RAP1_differenceOfMax_Minus_AboveCutOff	0.0284443	0.026777	0.330457	0.479762
SMP1_differenceOfMax_Minus_AboveCutOff	0.0861968	0.0353472	0.0265915	0.0627301
UGA3_differenceOfMax_Minus_AboveCutOff	-0.323599	7.05439	0.482955	0.980515
YAP3_differenceOfMax_Minus_AboveCutOff	-0.128161	0.0809249	0.0583781	0.235221
YAP5_differenceOfMax_Minus_AboveCutOff	-0.130265	4.0714	0.642886	0.980515
CUP2_differenceOfMax_Minus_AboveCutOff	NA	NA	NA	NA
GAL80_differenceOfMax_Minus_AboveCutOff	NA	NA	NA	NA
HAP5_differenceOfMax_Minus_AboveCutOff	-24.2235	723.216	0.331364	0.980515
HSF1_differenceOfMax_Minus_AboveCutOff	0.0397833	0.0252042	0.149113	0.23624
INO4_differenceOfMax_Minus_AboveCutOff	-0.191736	4.11695	0.484289	0.980515
MATALPHA2_differenceOfMax_Minus_AboveCutOff	0.241562	0.302193	0.00230038	0.644852
ORC1_differenceOfMax_Minus_AboveCutOff	-0.291409	7.73042	0.381692	0.980515
SPT15_differenceOfMax_Minus_AboveCutOff	0.0484998	0.0343435	0.19583	0.297666
STB4_differenceOfMax_Minus_AboveCutOff	NA	NA	NA	NA
SUM1_differenceOfMax_Minus_AboveCutOff	0.0506142	0.0297398	0.119681	0.199702
UME6_differenceOfMax_Minus_AboveCutOff	0.183088	4.0714	0.0377538	0.980515
YAP1_differenceOfMax_Minus_AboveCutOff	NA	NA	NA	NA
YDR026C_differenceOfMax_Minus_AboveCutOff	-7.20345	212.977	0.43848	0.980515
BAS1_differenceOfMax_Minus_AboveCutOff	-0.287972	7.76402	0.409938	0.980515
CAD1_differenceOfMax_Minus_AboveCutOff	-0.133508	4.0714	0.600539	0.980515
CIN5_differenceOfMax_Minus_AboveCutOff	-5.45254	164.016	0.268527	0.980515
CRZ1_differenceOfMax_Minus_AboveCutOff	0.0594256	0.0365279	0.130509	0.222674
ERT1_differenceOfMax_Minus_AboveCutOff	0.0437035	0.0445924	0.364702	0.530314
GCN4_differenceOfMax_Minus_AboveCutOff	0.0877153	0.0311932	0.0106754	0.0341747
GCR1_differenceOfMax_Minus_AboveCutOff	-0.286241	6.71742	0.352584	0.980515
HAP1_differenceOfMax_Minus_AboveCutOff	0.0505489	0.0321462	0.144994	0.238104
HAP3_differenceOfMax_Minus_AboveCutOff	NA	NA	NA	NA
LEU3_differenceOfMax_Minus_AboveCutOff	NA	NA	NA	NA
MAC1_differenceOfMax_Minus_AboveCutOff	-0.386367	10.465	0.417111	0.980515
MBP1_differenceOfMax_Minus_AboveCutOff	0.0761836	0.0295871	0.0167566	0.0502517
MET31_differenceOfMax_Minus_AboveCutOff	NA	NA	NA	NA
NRG1_differenceOfMax_Minus_AboveCutOff	-0.361019	7.45948	0.258441	0.980515
PHD1_differenceOfMax_Minus_AboveCutOff	-0.00947342	0.0517416	0.852677	0.980515
RLM1_differenceOfMax_Minus_AboveCutOff	0.0631355	0.0361185	0.113506	0.186166
RPH1_differenceOfMax_Minus_AboveCutOff	0.00481494	0.0466599	0.918786	0.980515
RPN4_differenceOfMax_Minus_AboveCutOff	-0.132451	4.0714	0.614683	0.980515
SIP4_differenceOfMax_Minus_AboveCutOff	NA	NA	NA	NA
TEC1_differenceOfMax_Minus_AboveCutOff	-5.06943	142.273	0.225637	0.980515
TYE7_differenceOfMax_Minus_AboveCutOff	0.0631549	0.032015	0.0711853	0.130159
YAP6_differenceOfMax_Minus_AboveCutOff	0.0291363	0.0495398	0.57609	0.792384
YAP7_differenceOfMax_Minus_AboveCutOff	0.0615672	0.0360092	0.117983	0.198127
RDS2_differenceOfMax_Minus_AboveCutOff	0.020871	0.0464537	0.658861	0.885983
YGR067C_differenceOfMax_Minus_AboveCutOff	0.0816127	0.0388457	0.0474662	0.106241
YML081W_differenceOfMax_Minus_AboveCutOff	0.0240345	0.047253	0.617727	0.847771
ASG1_differenceOfMax_Minus_AboveCutOff	0.0242513	0.0291761	0.447204	0.624336
CEP3_differenceOfMax_Minus_AboveCutOff	NA	NA	NA	NA
DOT6_differenceOfMax_Minus_AboveCutOff	-0.114176	0.147947	0.268261	0.663342
ECM22_differenceOfMax_Minus_AboveCutOff	-0.428266	8.57383	0.2853	0.980515
FHL1_differenceOfMax_Minus_AboveCutOff	0.0418703	0.0441617	0.366899	0.550052
GAT1_differenceOfMax_Minus_AboveCutOff	0.0655236	0.0307872	0.0450083	0.101389
GAT4_differenceOfMax_Minus_AboveCutOff	-0.268347	5.82053	0.480708	0.980515
HAL9_differenceOfMax_Minus_AboveCutOff	0.0570385	0.0334762	0.120288	0.199399
LYS14_differenceOfMax_Minus_AboveCutOff	NA	NA	NA	NA
MIG2_differenceOfMax_Minus_AboveCutOff	0.0401216	0.0336659	0.270779	0.404069
MIG3_differenceOfMax_Minus_AboveCutOff	-0.133352	4.0714	0.602649	0.980515
NDT80_differenceOfMax_Minus_AboveCutOff	NA	NA	NA	NA
NHP6A_differenceOfMax_Minus_AboveCutOff	0.0172803	0.0593743	0.779191	0.980515
NHP6B_differenceOfMax_Minus_AboveCutOff	0.0310523	0.0384388	0.457772	0.639743
OAF1_differenceOfMax_Minus_AboveCutOff	0.0769343	0.0494067	0.148544	0.243172
PHO2_differenceOfMax_Minus_AboveCutOff	-0.0382794	0.069237	0.547663	0.816578
RDR1_differenceOfMax_Minus_AboveCutOff	NA	NA	NA	NA
RDS1_differenceOfMax_Minus_AboveCutOff	NA	NA	NA	NA
SFL1_differenceOfMax_Minus_AboveCutOff	-164.654	3625.53	0.0249957	0.980515
SFP1_differenceOfMax_Minus_AboveCutOff	0.0970791	0.0314535	0.00518029	0.0202112
SRD1_differenceOfMax_Minus_AboveCutOff	NA	NA	NA	NA
STB3_differenceOfMax_Minus_AboveCutOff	-0.129878	4.0714	0.647722	0.980515
STP2_differenceOfMax_Minus_AboveCutOff	0.0681092	0.0439906	0.144803	0.246728
SUT2_differenceOfMax_Minus_AboveCutOff	-0.229609	7.21873	0.652395	0.980515
TBF1_differenceOfMax_Minus_AboveCutOff	-0.233237	7.29401	0.643835	0.980515
TBS1_differenceOfMax_Minus_AboveCutOff	-0.130567	4.0714	0.639118	0.980515
TEA1_differenceOfMax_Minus_AboveCutOff	NA	NA	NA	NA
TOD6_differenceOfMax_Minus_AboveCutOff	0.00681697	0.0582501	0.908341	0.980515
YKL222C_differenceOfMax_Minus_AboveCutOff	0.0366238	0.0457612	0.463038	0.644852
YLL054C_differenceOfMax_Minus_AboveCutOff	NA	NA	NA	NA
YPR013C_differenceOfMax_Minus_AboveCutOff	-0.130375	4.08171	0.645673	0.980515
YPR015C_differenceOfMax_Minus_AboveCutOff	NA	NA	NA	NA
YRM1_differenceOfMax_Minus_AboveCutOff	NA	NA	NA	NA
ABF2_differenceOfMeans_Minus_AboveCutOff	-0.0229561	0.0670145	0.717873	0.968945
CAT8_differenceOfMeans_Minus_AboveCutOff	-0.17832	0.24382	0.173961	0.688749
CST6_differenceOfMeans_Minus_AboveCutOff	0.00244545	0.0557374	0.965157	0.980515
ECM23_differenceOfMeans_Minus_AboveCutOff	-0.0610906	0.0673159	0.318947	0.57642
EDS1_differenceOfMeans_Minus_AboveCutOff	NA	NA	NA	NA
FKH2_differenceOfMeans_Minus_AboveCutOff	-0.384772	7.89845	0.25021	0.980515
FZF1_differenceOfMeans_Minus_AboveCutOff	-0.00574141	0.0512334	0.909382	0.980515
GIS1_differenceOfMeans_Minus_AboveCutOff	0.0644992	0.0405544	0.144456	0.233737
GSM1_differenceOfMeans_Minus_AboveCutOff	0.0403688	0.0482244	0.422736	0.622011
GZF3_differenceOfMeans_Minus_AboveCutOff	0.013321	0.0487287	0.787542	0.980515
HCM1_differenceOfMeans_Minus_AboveCutOff	0.0601834	0.0432013	0.186316	0.306854
HMRA2_differenceOfMeans_Minus_AboveCutOff	0.0426044	0.0352857	0.265486	0.396506
NHP10_differenceOfMeans_Minus_AboveCutOff	0.00476705	0.0387094	0.903545	0.980515
PDR8_differenceOfMeans_Minus_AboveCutOff	0.010838	0.0470471	0.820766	0.980515
REB1_differenceOfMeans_Minus_AboveCutOff	-0.237481	5.09613	0.454059	0.980515
REI1_differenceOfMeans_Minus_AboveCutOff	NA	NA	NA	NA
RSC30_differenceOfMeans_Minus_AboveCutOff	-0.00618276	0.0481174	0.89598	0.980515
RSC3_differenceOfMeans_Minus_AboveCutOff	0.0576855	0.0340215	0.117685	0.200664
RSF2_differenceOfMeans_Minus_AboveCutOff	0.0543289	0.0357898	0.167021	0.257236
STE12_differenceOfMeans_Minus_AboveCutOff	-4.04185	101.133	0.0764207	0.980515
STP3_differenceOfMeans_Minus_AboveCutOff	0.0282048	0.0382349	0.484975	0.686181
STP4_differenceOfMeans_Minus_AboveCutOff	0.0106401	0.0448926	0.816178	0.980515
SWI5_differenceOfMeans_Minus_AboveCutOff	0.0326322	0.0393647	0.432848	0.624636
TOS8_differenceOfMeans_Minus_AboveCutOff	-0.0269474	0.0542371	0.60811	0.855354
USV1_differenceOfMeans_Minus_AboveCutOff	0.0702585	0.038603	0.0892765	0.167595
YER130C_differenceOfMeans_Minus_AboveCutOff	0.00581499	0.0514671	0.911381	0.980515
YER184C_differenceOfMeans_Minus_AboveCutOff	0.12498	0.0380762	0.0027225	0.0147703
YLR278C_differenceOfMeans_Minus_AboveCutOff	0.0359888	0.040989	0.40645	0.595603
YNR063W_differenceOfMeans_Minus_AboveCutOff	0.00917636	0.0401483	0.824411	0.980515
YOX1_differenceOfMeans_Minus_AboveCutOff	0.0335744	0.0456968	0.477877	0.687279
YPR022C_differenceOfMeans_Minus_AboveCutOff	0.0398105	0.0397765	0.350037	0.517073
YPR196W_differenceOfMeans_Minus_AboveCutOff	0.100073	0.0368592	0.012491	0.0401047
ACA1_differenceOfMeans_Minus_AboveCutOff	NA	NA	NA	NA
ADR1_differenceOfMeans_Minus_AboveCutOff	NA	NA	NA	NA
AFT1_differenceOfMeans_Minus_AboveCutOff	-0.184923	5.73802	0.630843	0.980515
DAL81_differenceOfMeans_Minus_AboveCutOff	-0.132661	4.0714	0.611891	0.980515
DAL82_differenceOfMeans_Minus_AboveCutOff	NA	NA	NA	NA
DIG1_differenceOfMeans_Minus_AboveCutOff	NA	NA	NA	NA
FKH1_differenceOfMeans_Minus_AboveCutOff	0.00320745	0.0475137	0.946667	0.980515
MIG1_differenceOfMeans_Minus_AboveCutOff	NA	NA	NA	NA
OPI1_differenceOfMeans_Minus_AboveCutOff	-4.30101	94.6281	0.420504	0.980515
PIP2_differenceOfMeans_Minus_AboveCutOff	-0.130598	4.0714	0.63872	0.980515
PPR1_differenceOfMeans_Minus_AboveCutOff	NA	NA	NA	NA
RGM1_differenceOfMeans_Minus_AboveCutOff	-0.134895	4.0714	0.581502	0.980515
RTG1_differenceOfMeans_Minus_AboveCutOff	NA	NA	NA	NA
SKN7_differenceOfMeans_Minus_AboveCutOff	-0.253293	6.74072	0.383237	0.980515
UPC2_differenceOfMeans_Minus_AboveCutOff	NA	NA	NA	NA
WAR1_differenceOfMeans_Minus_AboveCutOff	NA	NA	NA	NA
XBP1_differenceOfMeans_Minus_AboveCutOff	-7.56949	208.288	0.154008	0.980515
AFT2_differenceOfMeans_Minus_AboveCutOff	-0.407608	7.688	0.22775	0.980515
MATA2_differenceOfMeans_Minus_AboveCutOff	0.0839884	0.0365915	0.0332033	0.0781897
MSN1_differenceOfMeans_Minus_AboveCutOff	0.0548519	0.0279906	0.0749951	0.133225
NRG2_differenceOfMeans_Minus_AboveCutOff	0.0457248	0.0337567	0.21814	0.321639
ROX1_differenceOfMeans_Minus_AboveCutOff	0.100854	0.0378253	0.0143211	0.0430984
DAL80_differenceOfMeans_Minus_AboveCutOff	0.0290663	0.047438	0.552962	0.775442
GLN3_differenceOfMeans_Minus_AboveCutOff	0.045172	0.0348603	0.238689	0.350304
HAP4_differenceOfMeans_Minus_AboveCutOff	-0.267782	5.83109	0.481908	0.980515
MET4_differenceOfMeans_Minus_AboveCutOff	-0.136574	4.0714	0.557813	0.980515
MOT2_differenceOfMeans_Minus_AboveCutOff	-3.93007	92.4291	0.352346	0.980515
MSN2_differenceOfMeans_Minus_AboveCutOff	-2.91713	87.2666	0.347564	0.980515
MSN4_differenceOfMeans_Minus_AboveCutOff	0.0509173	0.0322244	0.149488	0.235992
NDD1_differenceOfMeans_Minus_AboveCutOff	-3.27408	98.1433	0.437659	0.980515
RIM101_differenceOfMeans_Minus_AboveCutOff	0.0769533	0.0280847	0.00810817	0.0387079
SOK2_differenceOfMeans_Minus_AboveCutOff	0.0324676	0.0443342	0.486338	0.688649
SPT23_differenceOfMeans_Minus_AboveCutOff	0.0333518	0.0423926	0.457539	0.651925
SPT2_differenceOfMeans_Minus_AboveCutOff	0.0106664	0.0450607	0.818556	0.980515
STB1_differenceOfMeans_Minus_AboveCutOff	-0.403911	8.36023	0.261696	0.980515
STB5_differenceOfMeans_Minus_AboveCutOff	0.0612115	0.0264091	0.0349205	0.0754805
SUT1_differenceOfMeans_Minus_AboveCutOff	0.0253291	0.0366698	0.522787	0.718599
THO2_differenceOfMeans_Minus_AboveCutOff	0.024625	0.0424643	0.581413	0.797652
UME1_differenceOfMeans_Minus_AboveCutOff	NA	NA	NA	NA
ZAP1_differenceOfMeans_Minus_AboveCutOff	NA	NA	NA	NA
ABF1_differenceOfMeans_Minus_AboveCutOff	0.185382	4.0714	0.0311751	0.980515
ACE2_differenceOfMeans_Minus_AboveCutOff	0.0607313	0.0303517	0.0715978	0.124826
ARG81_differenceOfMeans_Minus_AboveCutOff	0.103214	0.0329314	0.00424872	0.0194496
ASH1_differenceOfMeans_Minus_AboveCutOff	-0.0545436	0.0596669	0.313432	0.572622
AZF1_differenceOfMeans_Minus_AboveCutOff	NA	NA	NA	NA
CBF1_differenceOfMeans_Minus_AboveCutOff	-0.153505	4.78159	0.637315	0.980515
GAL4_differenceOfMeans_Minus_AboveCutOff	NA	NA	NA	NA
GAT3_differenceOfMeans_Minus_AboveCutOff	-0.0261141	0.0591213	0.644065	0.890465
GCR2_differenceOfMeans_Minus_AboveCutOff	-0.0152141	0.0654239	0.81001	0.980515
GTS1_differenceOfMeans_Minus_AboveCutOff	0.0274179	0.0308673	0.417734	0.589779
HAC1_differenceOfMeans_Minus_AboveCutOff	NA	NA	NA	NA
HAP2_differenceOfMeans_Minus_AboveCutOff	0.0510902	0.0282058	0.10171	0.169256
IME1_differenceOfMeans_Minus_AboveCutOff	-0.18002	5.70309	0.664392	0.980515
IXR1_differenceOfMeans_Minus_AboveCutOff	NA	NA	NA	NA
JHD1_differenceOfMeans_Minus_AboveCutOff	-0.460048	12.4904	0.432286	0.980515
MATA1_differenceOfMeans_Minus_AboveCutOff	0.0227607	0.0372293	0.568534	0.77587
MET32_differenceOfMeans_Minus_AboveCutOff	NA	NA	NA	NA
MOT3_differenceOfMeans_Minus_AboveCutOff	-0.0074324	0.0531955	0.886725	0.980515
PDR1_differenceOfMeans_Minus_AboveCutOff	-0.130502	4.0714	0.639891	0.980515
RFX1_differenceOfMeans_Minus_AboveCutOff	NA	NA	NA	NA
RGT1_differenceOfMeans_Minus_AboveCutOff	NA	NA	NA	NA
RME1_differenceOfMeans_Minus_AboveCutOff	-0.0149972	0.0605742	0.797829	0.980515
RTG3_differenceOfMeans_Minus_AboveCutOff	0.0415377	0.0381795	0.323804	0.465085
SKO1_differenceOfMeans_Minus_AboveCutOff	NA	NA	NA	NA
SNF1_differenceOfMeans_Minus_AboveCutOff	NA	NA	NA	NA
SNT2_differenceOfMeans_Minus_AboveCutOff	NA	NA	NA	NA
STB2_differenceOfMeans_Minus_AboveCutOff	0.0386491	0.0444666	0.414221	0.600974
STP1_differenceOfMeans_Minus_AboveCutOff	0.372198	8.34126	0.0425122	0.980515
SWI4_differenceOfMeans_Minus_AboveCutOff	0.0275206	0.0396817	0.520203	0.717172
SWI6_differenceOfMeans_Minus_AboveCutOff	0.00200492	0.0424642	0.962568	0.980515
THI2_differenceOfMeans_Minus_AboveCutOff	1.05446	23.615	0.0420669	0.980515
URC2_differenceOfMeans_Minus_AboveCutOff	NA	NA	NA	NA
YHP1_differenceOfMeans_Minus_AboveCutOff	0.000545692	0.0487343	0.991076	0.992213
YRR1_differenceOfMeans_Minus_AboveCutOff	NA	NA	NA	NA
ARG80_differenceOfMeans_Minus_AboveCutOff	-0.355397	9.44831	0.37629	0.980515
ARO80_differenceOfMeans_Minus_AboveCutOff	NA	NA	NA	NA
ARR1_differenceOfMeans_Minus_AboveCutOff	0.05879	0.0351867	0.128309	0.208018
CHA4_differenceOfMeans_Minus_AboveCutOff	-0.251525	6.7288	0.390857	0.980515
CUP9_differenceOfMeans_Minus_AboveCutOff	NA	NA	NA	NA
HMS1_differenceOfMeans_Minus_AboveCutOff	0.0128011	0.0456151	0.781876	0.980515
INO2_differenceOfMeans_Minus_AboveCutOff	-0.352207	7.66732	0.480129	0.980515
MCM1_differenceOfMeans_Minus_AboveCutOff	-0.134491	4.0714	0.587107	0.980515
MET28_differenceOfMeans_Minus_AboveCutOff	0.0426154	0.0341801	0.260988	0.375483
MGA1_differenceOfMeans_Minus_AboveCutOff	0.0132663	0.0475269	0.784608	0.980515
PDR3_differenceOfMeans_Minus_AboveCutOff	0.0592288	0.0337325	0.106674	0.184367
PHO4_differenceOfMeans_Minus_AboveCutOff	NA	NA	NA	NA
PUT3_differenceOfMeans_Minus_AboveCutOff	NA	NA	NA	NA
RAP1_differenceOfMeans_Minus_AboveCutOff	0.0284443	0.026777	0.330457	0.479762
SMP1_differenceOfMeans_Minus_AboveCutOff	0.0859573	0.0353831	0.0271476	0.0632354
UGA3_differenceOfMeans_Minus_AboveCutOff	-0.323599	7.05439	0.482955	0.980515
YAP3_differenceOfMeans_Minus_AboveCutOff	-0.128161	0.0809249	0.0583781	0.235221
YAP5_differenceOfMeans_Minus_AboveCutOff	-0.130265	4.0714	0.642886	0.980515
CUP2_differenceOfMeans_Minus_AboveCutOff	NA	NA	NA	NA
GAL80_differenceOfMeans_Minus_AboveCutOff	NA	NA	NA	NA
HAP5_differenceOfMeans_Minus_AboveCutOff	-24.2235	723.216	0.331364	0.980515
HSF1_differenceOfMeans_Minus_AboveCutOff	0.0397833	0.0252042	0.149113	0.23624
INO4_differenceOfMeans_Minus_AboveCutOff	-0.191736	4.11695	0.484289	0.980515
MATALPHA2_differenceOfMeans_Minus_AboveCutOff	0.241562	0.302193	0.00230038	0.644852
ORC1_differenceOfMeans_Minus_AboveCutOff	-0.291409	7.73042	0.381692	0.980515
SPT15_differenceOfMeans_Minus_AboveCutOff	0.0488565	0.0342827	0.191938	0.29254
STB4_differenceOfMeans_Minus_AboveCutOff	NA	NA	NA	NA
SUM1_differenceOfMeans_Minus_AboveCutOff	0.0506142	0.0297398	0.119681	0.199702
UME6_differenceOfMeans_Minus_AboveCutOff	0.183088	4.0714	0.0377538	0.980515
YAP1_differenceOfMeans_Minus_AboveCutOff	NA	NA	NA	NA
YDR026C_differenceOfMeans_Minus_AboveCutOff	-7.20345	212.977	0.43848	0.980515
BAS1_differenceOfMeans_Minus_AboveCutOff	-0.287972	7.76402	0.409938	0.980515
CAD1_differenceOfMeans_Minus_AboveCutOff	-0.133508	4.0714	0.600539	0.980515
CIN5_differenceOfMeans_Minus_AboveCutOff	-5.45254	164.016	0.268527	0.980515
CRZ1_differenceOfMeans_Minus_AboveCutOff	0.0594256	0.0365279	0.130509	0.222674
ERT1_differenceOfMeans_Minus_AboveCutOff	0.0437035	0.0445924	0.364702	0.530314
GCN4_differenceOfMeans_Minus_AboveCutOff	0.0877153	0.0311932	0.0106754	0.0341747
GCR1_differenceOfMeans_Minus_AboveCutOff	-0.286241	6.71742	0.352584	0.980515
HAP1_differenceOfMeans_Minus_AboveCutOff	0.0505489	0.0321462	0.144994	0.238104
HAP3_differenceOfMeans_Minus_AboveCutOff	NA	NA	NA	NA
LEU3_differenceOfMeans_Minus_AboveCutOff	NA	NA	NA	NA
MAC1_differenceOfMeans_Minus_AboveCutOff	-0.386367	10.465	0.417111	0.980515
MBP1_differenceOfMeans_Minus_AboveCutOff	0.0761836	0.0295871	0.0167566	0.0502517
MET31_differenceOfMeans_Minus_AboveCutOff	NA	NA	NA	NA
NRG1_differenceOfMeans_Minus_AboveCutOff	-0.361019	7.45948	0.258441	0.980515
PHD1_differenceOfMeans_Minus_AboveCutOff	-0.00947342	0.0517416	0.852677	0.980515
RLM1_differenceOfMeans_Minus_AboveCutOff	0.0631355	0.0361185	0.113506	0.186166
RPH1_differenceOfMeans_Minus_AboveCutOff	0.00481494	0.0466599	0.918786	0.980515
RPN4_differenceOfMeans_Minus_AboveCutOff	-0.132451	4.0714	0.614683	0.980515
SIP4_differenceOfMeans_Minus_AboveCutOff	NA	NA	NA	NA
TEC1_differenceOfMeans_Minus_AboveCutOff	-5.06943	142.273	0.225637	0.980515
TYE7_differenceOfMeans_Minus_AboveCutOff	0.0631549	0.032015	0.0711853	0.130159
YAP6_differenceOfMeans_Minus_AboveCutOff	0.0291363	0.0495398	0.57609	0.792384
YAP7_differenceOfMeans_Minus_AboveCutOff	0.0615672	0.0360092	0.117983	0.198127
RDS2_differenceOfMeans_Minus_AboveCutOff	0.020871	0.0464537	0.658861	0.885983
YGR067C_differenceOfMeans_Minus_AboveCutOff	0.0813976	0.0389946	0.0488526	0.108712
YML081W_differenceOfMeans_Minus_AboveCutOff	0.0248348	0.0471697	0.605659	0.835339
ASG1_differenceOfMeans_Minus_AboveCutOff	0.0242513	0.0291761	0.447204	0.624336
CEP3_differenceOfMeans_Minus_AboveCutOff	NA	NA	NA	NA
DOT6_differenceOfMeans_Minus_AboveCutOff	-0.114176	0.147947	0.268261	0.663342
ECM22_differenceOfMeans_Minus_AboveCutOff	-0.428266	8.57383	0.2853	0.980515
FHL1_differenceOfMeans_Minus_AboveCutOff	0.0418703	0.0441617	0.366899	0.550052
GAT1_differenceOfMeans_Minus_AboveCutOff	0.0655236	0.0307872	0.0450083	0.101389
GAT4_differenceOfMeans_Minus_AboveCutOff	-0.268347	5.82053	0.480708	0.980515
HAL9_differenceOfMeans_Minus_AboveCutOff	0.0570385	0.0334762	0.120288	0.199399
LYS14_differenceOfMeans_Minus_AboveCutOff	NA	NA	NA	NA
MIG2_differenceOfMeans_Minus_AboveCutOff	0.0401216	0.0336659	0.270779	0.404069
MIG3_differenceOfMeans_Minus_AboveCutOff	-0.133352	4.0714	0.602649	0.980515
NDT80_differenceOfMeans_Minus_AboveCutOff	NA	NA	NA	NA
NHP6A_differenceOfMeans_Minus_AboveCutOff	0.0172394	0.0592336	0.779191	0.980515
NHP6B_differenceOfMeans_Minus_AboveCutOff	0.0310523	0.0384388	0.457772	0.639743
OAF1_differenceOfMeans_Minus_AboveCutOff	0.0769343	0.0494067	0.148544	0.243172
PHO2_differenceOfMeans_Minus_AboveCutOff	-0.0382794	0.069237	0.547663	0.816578
RDR1_differenceOfMeans_Minus_AboveCutOff	NA	NA	NA	NA
RDS1_differenceOfMeans_Minus_AboveCutOff	NA	NA	NA	NA
SFL1_differenceOfMeans_Minus_AboveCutOff	-164.654	3625.53	0.0249957	0.980515
SFP1_differenceOfMeans_Minus_AboveCutOff	0.0974036	0.0314479	0.00502745	0.0202112
SRD1_differenceOfMeans_Minus_AboveCutOff	NA	NA	NA	NA
STB3_differenceOfMeans_Minus_AboveCutOff	-0.129878	4.0714	0.647722	0.980515
STP2_differenceOfMeans_Minus_AboveCutOff	0.0681092	0.0439906	0.144803	0.246728
SUT2_differenceOfMeans_Minus_AboveCutOff	-0.229609	7.21873	0.652395	0.980515
TBF1_differenceOfMeans_Minus_AboveCutOff	-0.233237	7.29401	0.643835	0.980515
TBS1_differenceOfMeans_Minus_AboveCutOff	-0.130567	4.0714	0.639118	0.980515
TEA1_differenceOfMeans_Minus_AboveCutOff	NA	NA	NA	NA
TOD6_differenceOfMeans_Minus_AboveCutOff	0.00681697	0.0582501	0.908341	0.980515
YKL222C_differenceOfMeans_Minus_AboveCutOff	0.0366238	0.0457612	0.463038	0.644852
YLL054C_differenceOfMeans_Minus_AboveCutOff	NA	NA	NA	NA
YPR013C_differenceOfMeans_Minus_AboveCutOff	-0.130375	4.08171	0.645673	0.980515
YPR015C_differenceOfMeans_Minus_AboveCutOff	NA	NA	NA	NA
YRM1_differenceOfMeans_Minus_AboveCutOff	NA	NA	NA	NA
ABF2_deltaSignificantBindingSites_Minus_AboveCutOff	-0.0159602	0.0614337	0.787466	0.980515
CAT8_deltaSignificantBindingSites_Minus_AboveCutOff	-0.720706	16.8433	0.130981	0.980515
CST6_deltaSignificantBindingSites_Minus_AboveCutOff	-0.00982109	0.0603718	0.868704	0.980515
ECM23_deltaSignificantBindingSites_Minus_AboveCutOff	-0.0739277	0.071011	0.242996	0.491542
EDS1_deltaSignificantBindingSites_Minus_AboveCutOff	NA	NA	NA	NA
FKH2_deltaSignificantBindingSites_Minus_AboveCutOff	-0.384772	7.89845	0.25021	0.980515
FZF1_deltaSignificantBindingSites_Minus_AboveCutOff	-0.00574141	0.0512334	0.909382	0.980515
GIS1_deltaSignificantBindingSites_Minus_AboveCutOff	0.0664428	0.0398253	0.126186	0.208647
GSM1_deltaSignificantBindingSites_Minus_AboveCutOff	0.0265347	0.0503889	0.610056	0.835339
GZF3_deltaSignificantBindingSites_Minus_AboveCutOff	-0.0107319	0.0511782	0.83199	0.980515
HCM1_deltaSignificantBindingSites_Minus_AboveCutOff	0.0541347	0.0435168	0.235508	0.376783
HMRA2_deltaSignificantBindingSites_Minus_AboveCutOff	0.0418039	0.0355083	0.276063	0.411293
NHP10_deltaSignificantBindingSites_Minus_AboveCutOff	0.00595109	0.0384299	0.879327	0.980515
PDR8_deltaSignificantBindingSites_Minus_AboveCutOff	-0.00544305	0.0507447	0.913858	0.980515
REB1_deltaSignificantBindingSites_Minus_AboveCutOff	-0.231717	4.98511	0.454059	0.980515
REI1_deltaSignificantBindingSites_Minus_AboveCutOff	NA	NA	NA	NA
RSC30_deltaSignificantBindingSites_Minus_AboveCutOff	-0.00618276	0.0481174	0.89598	0.980515
RSC3_deltaSignificantBindingSites_Minus_AboveCutOff	0.0741198	0.0349493	0.0510467	0.102691
RSF2_deltaSignificantBindingSites_Minus_AboveCutOff	0.0556761	0.0362089	0.162082	0.250592
STE12_deltaSignificantBindingSites_Minus_AboveCutOff	-0.603821	13.5049	0.131239	0.980515
STP3_deltaSignificantBindingSites_Minus_AboveCutOff	0.0315042	0.0372935	0.426157	0.617217
STP4_deltaSignificantBindingSites_Minus_AboveCutOff	0.0155516	0.0425871	0.722421	0.949411
SWI5_deltaSignificantBindingSites_Minus_AboveCutOff	0.0135386	0.0445587	0.76656	0.980515
TOS8_deltaSignificantBindingSites_Minus_AboveCutOff	-0.0311665	0.0552441	0.558872	0.809248
USV1_deltaSignificantBindingSites_Minus_AboveCutOff	0.0626653	0.0385548	0.128319	0.22313
YER130C_deltaSignificantBindingSites_Minus_AboveCutOff	0.00581554	0.0536471	0.914908	0.980515
YER184C_deltaSignificantBindingSites_Minus_AboveCutOff	0.139671	0.0373127	0.000667745	0.00659496
YLR278C_deltaSignificantBindingSites_Minus_AboveCutOff	0.0184194	0.0457013	0.695607	0.917777
YNR063W_deltaSignificantBindingSites_Minus_AboveCutOff	0.00978475	0.0383612	0.805032	0.980515
YOX1_deltaSignificantBindingSites_Minus_AboveCutOff	0.024245	0.0464671	0.61097	0.838625
YPR022C_deltaSignificantBindingSites_Minus_AboveCutOff	0.0360715	0.0405413	0.40343	0.589229
YPR196W_deltaSignificantBindingSites_Minus_AboveCutOff	0.0976446	0.0372235	0.0156459	0.0456835
ACA1_deltaSignificantBindingSites_Minus_AboveCutOff	NA	NA	NA	NA
ADR1_deltaSignificantBindingSites_Minus_AboveCutOff	NA	NA	NA	NA
AFT1_deltaSignificantBindingSites_Minus_AboveCutOff	-0.185547	5.75738	0.630843	0.980515
DAL81_deltaSignificantBindingSites_Minus_AboveCutOff	-0.132661	4.0714	0.611891	0.980515
DAL82_deltaSignificantBindingSites_Minus_AboveCutOff	NA	NA	NA	NA
DIG1_deltaSignificantBindingSites_Minus_AboveCutOff	NA	NA	NA	NA
FKH1_deltaSignificantBindingSites_Minus_AboveCutOff	0.00203422	0.0480373	0.966418	0.980515
MIG1_deltaSignificantBindingSites_Minus_AboveCutOff	NA	NA	NA	NA
OPI1_deltaSignificantBindingSites_Minus_AboveCutOff	-0.225761	4.97962	0.510119	0.980515
PIP2_deltaSignificantBindingSites_Minus_AboveCutOff	-0.130598	4.0714	0.63872	0.980515
PPR1_deltaSignificantBindingSites_Minus_AboveCutOff	NA	NA	NA	NA
RGM1_deltaSignificantBindingSites_Minus_AboveCutOff	-0.134895	4.0714	0.581502	0.980515
RTG1_deltaSignificantBindingSites_Minus_AboveCutOff	NA	NA	NA	NA
SKN7_deltaSignificantBindingSites_Minus_AboveCutOff	-0.251094	6.71089	0.383237	0.980515
UPC2_deltaSignificantBindingSites_Minus_AboveCutOff	NA	NA	NA	NA
WAR1_deltaSignificantBindingSites_Minus_AboveCutOff	NA	NA	NA	NA
XBP1_deltaSignificantBindingSites_Minus_AboveCutOff	-0.488351	12.344	0.203016	0.980515
AFT2_deltaSignificantBindingSites_Minus_AboveCutOff	-0.408032	7.71235	0.22775	0.980515
MATA2_deltaSignificantBindingSites_Minus_AboveCutOff	0.084532	0.0366698	0.032484	0.0768364
MSN1_deltaSignificantBindingSites_Minus_AboveCutOff	0.0524373	0.0280979	0.0910757	0.156286
NRG2_deltaSignificantBindingSites_Minus_AboveCutOff	0.0463779	0.0333017	0.205995	0.306878
ROX1_deltaSignificantBindingSites_Minus_AboveCutOff	0.0942221	0.0384184	0.0237471	0.0613771
DAL80_deltaSignificantBindingSites_Minus_AboveCutOff	0.0290663	0.047438	0.552962	0.775442
GLN3_deltaSignificantBindingSites_Minus_AboveCutOff	0.0453613	0.0355532	0.246093	0.36041
HAP4_deltaSignificantBindingSites_Minus_AboveCutOff	-0.264078	5.73727	0.481908	0.980515
MET4_deltaSignificantBindingSites_Minus_AboveCutOff	-0.136574	4.0714	0.557813	0.980515
MOT2_deltaSignificantBindingSites_Minus_AboveCutOff	-0.377044	10.2456	0.425863	0.980515
MSN2_deltaSignificantBindingSites_Minus_AboveCutOff	-0.378053	10.2463	0.419188	0.980515
MSN4_deltaSignificantBindingSites_Minus_AboveCutOff	0.050938	0.031894	0.145336	0.231546
NDD1_deltaSignificantBindingSites_Minus_AboveCutOff	-0.29083	6.43541	0.514602	0.980515
RIM101_deltaSignificantBindingSites_Minus_AboveCutOff	0.0769533	0.0280847	0.00810817	0.0387079
SOK2_deltaSignificantBindingSites_Minus_AboveCutOff	0.0272995	0.0459097	0.569019	0.789435
SPT23_deltaSignificantBindingSites_Minus_AboveCutOff	0.0340851	0.0433237	0.457129	0.651925
SPT2_deltaSignificantBindingSites_Minus_AboveCutOff	0.0125508	0.0428864	0.778065	0.980515
STB1_deltaSignificantBindingSites_Minus_AboveCutOff	-0.38319	7.92972	0.261696	0.980515
STB5_deltaSignificantBindingSites_Minus_AboveCutOff	0.0577559	0.0267543	0.0494582	0.0968554
SUT1_deltaSignificantBindingSites_Minus_AboveCutOff	0.0252913	0.0373138	0.530639	0.726557
THO2_deltaSignificantBindingSites_Minus_AboveCutOff	0.0238815	0.0424554	0.59209	0.810394
UME1_deltaSignificantBindingSites_Minus_AboveCutOff	NA	NA	NA	NA
ZAP1_deltaSignificantBindingSites_Minus_AboveCutOff	NA	NA	NA	NA
ABF1_deltaSignificantBindingSites_Minus_AboveCutOff	0.185382	4.0714	0.0311751	0.980515
ACE2_deltaSignificantBindingSites_Minus_AboveCutOff	0.060398	0.0295568	0.0657096	0.117132
ARG81_deltaSignificantBindingSites_Minus_AboveCutOff	0.0991493	0.0334271	0.00687752	0.0255416
ASH1_deltaSignificantBindingSites_Minus_AboveCutOff	-0.0491594	0.0589411	0.363241	0.623189
AZF1_deltaSignificantBindingSites_Minus_AboveCutOff	NA	NA	NA	NA
CBF1_deltaSignificantBindingSites_Minus_AboveCutOff	-0.184831	5.75738	0.637315	0.980515
GAL4_deltaSignificantBindingSites_Minus_AboveCutOff	NA	NA	NA	NA
GAT3_deltaSignificantBindingSites_Minus_AboveCutOff	-0.0265428	0.0590496	0.638019	0.885983
GCR2_deltaSignificantBindingSites_Minus_AboveCutOff	-0.0152141	0.0654239	0.81001	0.980515
GTS1_deltaSignificantBindingSites_Minus_AboveCutOff	0.0324144	0.0307845	0.337083	0.485118
HAC1_deltaSignificantBindingSites_Minus_AboveCutOff	NA	NA	NA	NA
HAP2_deltaSignificantBindingSites_Minus_AboveCutOff	0.0486626	0.0287985	0.128911	0.202419
IME1_deltaSignificantBindingSites_Minus_AboveCutOff	-0.181733	5.75738	0.664392	0.980515
IXR1_deltaSignificantBindingSites_Minus_AboveCutOff	NA	NA	NA	NA
JHD1_deltaSignificantBindingSites_Minus_AboveCutOff	-0.44933	12.2308	0.432286	0.980515
MATA1_deltaSignificantBindingSites_Minus_AboveCutOff	0.0220265	0.0372732	0.580819	0.791736
MET32_deltaSignificantBindingSites_Minus_AboveCutOff	NA	NA	NA	NA
MOT3_deltaSignificantBindingSites_Minus_AboveCutOff	-0.00725532	0.0545566	0.892248	0.980515
PDR1_deltaSignificantBindingSites_Minus_AboveCutOff	NA	NA	NA	NA
RFX1_deltaSignificantBindingSites_Minus_AboveCutOff	NA	NA	NA	NA
RGT1_deltaSignificantBindingSites_Minus_AboveCutOff	NA	NA	NA	NA
RME1_deltaSignificantBindingSites_Minus_AboveCutOff	-0.021538	0.0651981	0.728966	0.979775
RTG3_deltaSignificantBindingSites_Minus_AboveCutOff	0.042016	0.0378857	0.314234	0.45315
SKO1_deltaSignificantBindingSites_Minus_AboveCutOff	NA	NA	NA	NA
SNF1_deltaSignificantBindingSites_Minus_AboveCutOff	NA	NA	NA	NA
SNT2_deltaSignificantBindingSites_Minus_AboveCutOff	NA	NA	NA	NA
STB2_deltaSignificantBindingSites_Minus_AboveCutOff	0.0424482	0.0426401	0.352137	0.520983
STP1_deltaSignificantBindingSites_Minus_AboveCutOff	0.363256	8.14088	0.0425122	0.980515
SWI4_deltaSignificantBindingSites_Minus_AboveCutOff	0.0293822	0.0384719	0.48063	0.668958
SWI6_deltaSignificantBindingSites_Minus_AboveCutOff	-0.0029149	0.0441839	0.946928	0.980515
THI2_deltaSignificantBindingSites_Minus_AboveCutOff	NA	NA	NA	NA
URC2_deltaSignificantBindingSites_Minus_AboveCutOff	NA	NA	NA	NA
YHP1_deltaSignificantBindingSites_Minus_AboveCutOff	0.000545692	0.0487343	0.991076	0.992213
YRR1_deltaSignificantBindingSites_Minus_AboveCutOff	NA	NA	NA	NA
ARG80_deltaSignificantBindingSites_Minus_AboveCutOff	-0.355913	9.47429	0.37629	0.980515
ARO80_deltaSignificantBindingSites_Minus_AboveCutOff	NA	NA	NA	NA
ARR1_deltaSignificantBindingSites_Minus_AboveCutOff	0.0575224	0.035243	0.13731	0.221316
CHA4_deltaSignificantBindingSites_Minus_AboveCutOff	-0.250272	6.69299	0.390857	0.980515
CUP9_deltaSignificantBindingSites_Minus_AboveCutOff	NA	NA	NA	NA
HMS1_deltaSignificantBindingSites_Minus_AboveCutOff	0.00312468	0.0466535	0.946798	0.980515
INO2_deltaSignificantBindingSites_Minus_AboveCutOff	-0.323786	7.04882	0.480129	0.980515
MCM1_deltaSignificantBindingSites_Minus_AboveCutOff	-0.134491	4.0714	0.587107	0.980515
MET28_deltaSignificantBindingSites_Minus_AboveCutOff	0.0412657	0.0346463	0.283477	0.404069
MGA1_deltaSignificantBindingSites_Minus_AboveCutOff	0.00858542	0.0488043	0.862237	0.980515
PDR3_deltaSignificantBindingSites_Minus_AboveCutOff	0.0587892	0.0345683	0.119116	0.199777
PHO4_deltaSignificantBindingSites_Minus_AboveCutOff	NA	NA	NA	NA
PUT3_deltaSignificantBindingSites_Minus_AboveCutOff	NA	NA	NA	NA
RAP1_deltaSignificantBindingSites_Minus_AboveCutOff	0.0279525	0.0267899	0.34054	0.491326
SMP1_deltaSignificantBindingSites_Minus_AboveCutOff	0.0926117	0.0341951	0.0138896	0.0405103
UGA3_deltaSignificantBindingSites_Minus_AboveCutOff	-0.323352	7.04899	0.482955	0.980515
YAP3_deltaSignificantBindingSites_Minus_AboveCutOff	-0.13508	0.0828912	0.0490569	0.222113
YAP5_deltaSignificantBindingSites_Minus_AboveCutOff	-0.130265	4.0714	0.642886	0.980515
CUP2_deltaSignificantBindingSites_Minus_AboveCutOff	NA	NA	NA	NA
GAL80_deltaSignificantBindingSites_Minus_AboveCutOff	NA	NA	NA	NA
HAP5_deltaSignificantBindingSites_Minus_AboveCutOff	-0.185508	4.06843	0.49708	0.980515
HSF1_deltaSignificantBindingSites_Minus_AboveCutOff	0.0405971	0.025157	0.139434	0.227164
INO4_deltaSignificantBindingSites_Minus_AboveCutOff	-0.186607	4.06633	0.484289	0.980515
MATALPHA2_deltaSignificantBindingSites_Minus_AboveCutOff	0.455337	7.04459	0.00212604	0.980515
ORC1_deltaSignificantBindingSites_Minus_AboveCutOff	-0.290044	7.73808	0.381692	0.980515
SPT15_deltaSignificantBindingSites_Minus_AboveCutOff	0.0624824	0.0317417	0.0735029	0.131312
STB4_deltaSignificantBindingSites_Minus_AboveCutOff	NA	NA	NA	NA
SUM1_deltaSignificantBindingSites_Minus_AboveCutOff	0.0514084	0.0309281	0.129245	0.210638
UME6_deltaSignificantBindingSites_Minus_AboveCutOff	0.183088	4.0714	0.0377538	0.980515
YAP1_deltaSignificantBindingSites_Minus_AboveCutOff	NA	NA	NA	NA
YDR026C_deltaSignificantBindingSites_Minus_AboveCutOff	-0.18982	5.75738	0.590626	0.980515
BAS1_deltaSignificantBindingSites_Minus_AboveCutOff	-0.286875	7.742	0.409938	0.980515
CAD1_deltaSignificantBindingSites_Minus_AboveCutOff	-0.133508	4.0714	0.600539	0.980515
CIN5_deltaSignificantBindingSites_Minus_AboveCutOff	-0.455001	10.5748	0.331407	0.980515
CRZ1_deltaSignificantBindingSites_Minus_AboveCutOff	0.0644145	0.0356574	0.0940242	0.170759
ERT1_deltaSignificantBindingSites_Minus_AboveCutOff	0.0441742	0.046577	0.38014	0.550052
GCN4_deltaSignificantBindingSites_Minus_AboveCutOff	0.0855877	0.0314764	0.0141185	0.0401047
GCR1_deltaSignificantBindingSites_Minus_AboveCutOff	-0.285672	6.71054	0.352584	0.980515
HAP1_deltaSignificantBindingSites_Minus_AboveCutOff	0.0470115	0.0307422	0.158418	0.253398
HAP3_deltaSignificantBindingSites_Minus_AboveCutOff	NA	NA	NA	NA
LEU3_deltaSignificantBindingSites_Minus_AboveCutOff	NA	NA	NA	NA
MAC1_deltaSignificantBindingSites_Minus_AboveCutOff	-0.378375	10.2484	0.417111	0.980515
MBP1_deltaSignificantBindingSites_Minus_AboveCutOff	0.0762979	0.0294237	0.016709	0.0483241
MET31_deltaSignificantBindingSites_Minus_AboveCutOff	NA	NA	NA	NA
NRG1_deltaSignificantBindingSites_Minus_AboveCutOff	-0.355263	7.34509	0.258441	0.980515
PHD1_deltaSignificantBindingSites_Minus_AboveCutOff	-0.0152125	0.0528393	0.768297	0.980515
RLM1_deltaSignificantBindingSites_Minus_AboveCutOff	0.0597276	0.0362635	0.137158	0.215715
RPH1_deltaSignificantBindingSites_Minus_AboveCutOff	-0.0103474	0.0526408	0.839845	0.980515
RPN4_deltaSignificantBindingSites_Minus_AboveCutOff	NA	NA	NA	NA
SIP4_deltaSignificantBindingSites_Minus_AboveCutOff	NA	NA	NA	NA
TEC1_deltaSignificantBindingSites_Minus_AboveCutOff	-0.493076	9.47073	0.261882	0.980515
TYE7_deltaSignificantBindingSites_Minus_AboveCutOff	0.0595064	0.0325009	0.0963984	0.164541
YAP6_deltaSignificantBindingSites_Minus_AboveCutOff	0.0265468	0.0503328	0.614622	0.835339
YAP7_deltaSignificantBindingSites_Minus_AboveCutOff	0.0622895	0.0364045	0.117128	0.197938
RDS2_deltaSignificantBindingSites_Minus_AboveCutOff	0.0165987	0.0471264	0.7283	0.961296
YGR067C_deltaSignificantBindingSites_Minus_AboveCutOff	0.0714783	0.0378945	0.0745471	0.150975
YML081W_deltaSignificantBindingSites_Minus_AboveCutOff	0.00459687	0.049486	0.926275	0.980515
ASG1_deltaSignificantBindingSites_Minus_AboveCutOff	0.0248497	0.0290054	0.433881	0.608368
CEP3_deltaSignificantBindingSites_Minus_AboveCutOff	NA	NA	NA	NA
DOT6_deltaSignificantBindingSites_Minus_AboveCutOff	-0.64088	15.1669	0.159346	0.980515
ECM22_deltaSignificantBindingSites_Minus_AboveCutOff	-0.405905	8.47535	0.285299	0.980515
FHL1_deltaSignificantBindingSites_Minus_AboveCutOff	0.0335219	0.044465	0.469772	0.67546
GAT1_deltaSignificantBindingSites_Minus_AboveCutOff	0.0627328	0.0308152	0.0582879	0.118554
GAT4_deltaSignificantBindingSites_Minus_AboveCutOff	-0.264216	5.73682	0.480708	0.980515
HAL9_deltaSignificantBindingSites_Minus_AboveCutOff	0.0605587	0.0343874	0.108314	0.183446
LYS14_deltaSignificantBindingSites_Minus_AboveCutOff	NA	NA	NA	NA
MIG2_deltaSignificantBindingSites_Minus_AboveCutOff	0.0543189	0.0357275	0.159883	0.256442
MIG3_deltaSignificantBindingSites_Minus_AboveCutOff	-0.133352	4.0714	0.602649	0.980515
NDT80_deltaSignificantBindingSites_Minus_AboveCutOff	NA	NA	NA	NA
NHP6A_deltaSignificantBindingSites_Minus_AboveCutOff	0.0182649	0.0608463	0.772654	0.980515
NHP6B_deltaSignificantBindingSites_Minus_AboveCutOff	0.0311172	0.0384865	0.457489	0.639743
OAF1_deltaSignificantBindingSites_Minus_AboveCutOff	0.0811924	0.0532137	0.159237	0.254522
PHO2_deltaSignificantBindingSites_Minus_AboveCutOff	-0.0357686	0.0675623	0.566575	0.833903
RDR1_deltaSignificantBindingSites_Minus_AboveCutOff	NA	NA	NA	NA
RDS1_deltaSignificantBindingSites_Minus_AboveCutOff	NA	NA	NA	NA
SFL1_deltaSignificantBindingSites_Minus_AboveCutOff	-0.695966	12.7422	0.0670543	0.980515
SFP1_deltaSignificantBindingSites_Minus_AboveCutOff	0.0758741	0.0314351	0.0273997	0.0644951
SRD1_deltaSignificantBindingSites_Minus_AboveCutOff	NA	NA	NA	NA
STB3_deltaSignificantBindingSites_Minus_AboveCutOff	-0.129878	4.0714	0.647722	0.980515
STP2_deltaSignificantBindingSites_Minus_AboveCutOff	0.0638928	0.0434733	0.172967	0.273997
SUT2_deltaSignificantBindingSites_Minus_AboveCutOff	-0.224267	7.05077	0.652395	0.980515
TBF1_deltaSignificantBindingSites_Minus_AboveCutOff	-0.260317	8.14088	0.643835	0.980515
TBS1_deltaSignificantBindingSites_Minus_AboveCutOff	-0.130567	4.0714	0.639118	0.980515
TEA1_deltaSignificantBindingSites_Minus_AboveCutOff	NA	NA	NA	NA
TOD6_deltaSignificantBindingSites_Minus_AboveCutOff	0.0111939	0.0536708	0.839246	0.980515
YKL222C_deltaSignificantBindingSites_Minus_AboveCutOff	0.0381732	0.0458365	0.445611	0.623889
YLL054C_deltaSignificantBindingSites_Minus_AboveCutOff	NA	NA	NA	NA
YPR013C_deltaSignificantBindingSites_Minus_AboveCutOff	-0.130046	4.0714	0.645673	0.980515
YPR015C_deltaSignificantBindingSites_Minus_AboveCutOff	NA	NA	NA	NA
YRM1_deltaSignificantBindingSites_Minus_AboveCutOff	NA	NA	NA	NA
metaChangeInNumberOfTFBS_Minus_AboveCutOff	0.227232	0.0419449	2.50312e-07	9.23476e-06
metaAverage_differenceOfMeans_Minus_AboveCutOff	0.237049	0.0409321	3.60075e-08	1.33832e-06
metaMax_differenceOfMeans_Minus_AboveCutOff	0.24784	0.0464261	1.63062e-07	1.28139e-05
metaAverage_differenceOfMax_Minus_AboveCutOff	0.236838	0.0409344	3.7141e-08	1.33832e-06
metaMax_differenceOfMax_Minus_AboveCutOff	0.247897	0.0464277	1.62128e-07	1.28139e-05
ABF2_differenceOfMax_Agnostic_AboveCutOff	0.0412335	0.0427788	0.369018	0.538996
CAT8_differenceOfMax_Agnostic_AboveCutOff	-0.056364	0.074852	0.399095	0.675778
CST6_differenceOfMax_Agnostic_AboveCutOff	0.00588615	0.0528298	0.911905	0.980515
ECM23_differenceOfMax_Agnostic_AboveCutOff	-0.0287804	0.0564566	0.598527	0.84711
EDS1_differenceOfMax_Agnostic_AboveCutOff	NA	NA	NA	NA
FKH2_differenceOfMax_Agnostic_AboveCutOff	-0.587073	13.0328	0.11731	0.980515
FZF1_differenceOfMax_Agnostic_AboveCutOff	-0.0233695	0.0568695	0.668368	0.91097
GIS1_differenceOfMax_Agnostic_AboveCutOff	0.100299	0.035439	0.00968522	0.0332699
GSM1_differenceOfMax_Agnostic_AboveCutOff	0.0165017	0.0509223	0.750255	0.980515
GZF3_differenceOfMax_Agnostic_AboveCutOff	0.058985	0.0437095	0.195636	0.323012
HCM1_differenceOfMax_Agnostic_AboveCutOff	0.0320912	0.0485492	0.517444	0.740106
HMRA2_differenceOfMax_Agnostic_AboveCutOff	0.0514649	0.0381309	0.208825	0.323012
NHP10_differenceOfMax_Agnostic_AboveCutOff	0.000161053	0.0426262	0.996987	0.99737
PDR8_differenceOfMax_Agnostic_AboveCutOff	-0.0280833	0.0525201	0.580415	0.830113
REB1_differenceOfMax_Agnostic_AboveCutOff	-5.95038	171.723	0.260405	0.980515
REI1_differenceOfMax_Agnostic_AboveCutOff	0.07039	0.0414355	0.12242	0.199808
RSC30_differenceOfMax_Agnostic_AboveCutOff	0.0430445	0.0393886	0.308288	0.462686
RSC3_differenceOfMax_Agnostic_AboveCutOff	0.0382632	0.0386322	0.347775	0.524668
RSF2_differenceOfMax_Agnostic_AboveCutOff	0.111146	0.0305336	0.000751692	0.00827261
STE12_differenceOfMax_Agnostic_AboveCutOff	-0.0580925	0.0727425	0.359343	0.644852
STP3_differenceOfMax_Agnostic_AboveCutOff	0.0486301	0.0383088	0.234002	0.363742
STP4_differenceOfMax_Agnostic_AboveCutOff	0.0149583	0.0452763	0.746217	0.979775
SWI5_differenceOfMax_Agnostic_AboveCutOff	0.0513498	0.0387597	0.212958	0.335558
TOS8_differenceOfMax_Agnostic_AboveCutOff	-0.011639	0.0507562	0.816891	0.980515
USV1_differenceOfMax_Agnostic_AboveCutOff	0.104373	0.0386419	0.0118096	0.0405846
YER130C_differenceOfMax_Agnostic_AboveCutOff	0.0672529	0.0364785	0.0911812	0.162685
YER184C_differenceOfMax_Agnostic_AboveCutOff	0.0590605	0.0455865	0.215672	0.350304
YLR278C_differenceOfMax_Agnostic_AboveCutOff	0.00121844	0.0510356	0.980982	0.983985
YNR063W_differenceOfMax_Agnostic_AboveCutOff	-0.0418006	0.0644856	0.471747	0.74999
YOX1_differenceOfMax_Agnostic_AboveCutOff	0.0195776	0.0458389	0.674706	0.898877
YPR022C_differenceOfMax_Agnostic_AboveCutOff	0.0208776	0.043534	0.640846	0.868359
YPR196W_differenceOfMax_Agnostic_AboveCutOff	0.103531	0.0391428	0.0132232	0.0446533
ACA1_differenceOfMax_Agnostic_AboveCutOff	NA	NA	NA	NA
ADR1_differenceOfMax_Agnostic_AboveCutOff	NA	NA	NA	NA
AFT1_differenceOfMax_Agnostic_AboveCutOff	-0.260498	5.74504	0.508213	0.980515
DAL81_differenceOfMax_Agnostic_AboveCutOff	-0.132661	4.0714	0.611891	0.980515
DAL82_differenceOfMax_Agnostic_AboveCutOff	-0.226316	4.99221	0.508562	0.980515
DIG1_differenceOfMax_Agnostic_AboveCutOff	NA	NA	NA	NA
FKH1_differenceOfMax_Agnostic_AboveCutOff	-0.0291294	0.0620823	0.614281	0.873888
MIG1_differenceOfMax_Agnostic_AboveCutOff	-0.130361	4.0714	0.641673	0.980515
OPI1_differenceOfMax_Agnostic_AboveCutOff	-8.27356	252.016	0.222004	0.980515
PIP2_differenceOfMax_Agnostic_AboveCutOff	-0.130598	4.0714	0.63872	0.980515
PPR1_differenceOfMax_Agnostic_AboveCutOff	-0.126517	4.0714	0.687729	0.980515
RGM1_differenceOfMax_Agnostic_AboveCutOff	-0.134895	4.0714	0.581502	0.980515
RTG1_differenceOfMax_Agnostic_AboveCutOff	NA	NA	NA	NA
SKN7_differenceOfMax_Agnostic_AboveCutOff	-0.357288	8.26183	0.320706	0.980515
UPC2_differenceOfMax_Agnostic_AboveCutOff	-0.182613	5.73333	0.650194	0.980515
WAR1_differenceOfMax_Agnostic_AboveCutOff	NA	NA	NA	NA
XBP1_differenceOfMax_Agnostic_AboveCutOff	-9.74257	204.721	0.0549117	0.980515
AFT2_differenceOfMax_Agnostic_AboveCutOff	0.0201043	0.0417161	0.643987	0.866968
MATA2_differenceOfMax_Agnostic_AboveCutOff	0.131643	0.0376679	0.00123534	0.0111912
MSN1_differenceOfMax_Agnostic_AboveCutOff	0.0733299	0.0297705	0.0259765	0.0610026
NRG2_differenceOfMax_Agnostic_AboveCutOff	0.0668544	0.0367117	0.0975128	0.167367
ROX1_differenceOfMax_Agnostic_AboveCutOff	0.101839	0.0407676	0.0197275	0.0576845
DAL80_differenceOfMax_Agnostic_AboveCutOff	0.0213464	0.0493494	0.670391	0.89493
GLN3_differenceOfMax_Agnostic_AboveCutOff	0.0294907	0.0389275	0.472677	0.672925
HAP4_differenceOfMax_Agnostic_AboveCutOff	-0.329062	8.86233	0.407311	0.980515
MET4_differenceOfMax_Agnostic_AboveCutOff	-0.136574	4.0714	0.557813	0.980515
MOT2_differenceOfMax_Agnostic_AboveCutOff	-0.00927531	0.0591975	0.872494	0.980515
MSN2_differenceOfMax_Agnostic_AboveCutOff	0.00977013	0.0497598	0.848309	0.980515
MSN4_differenceOfMax_Agnostic_AboveCutOff	0.0675466	0.039587	0.118728	0.198722
NDD1_differenceOfMax_Agnostic_AboveCutOff	0.00788881	0.0454891	0.865299	0.980515
RIM101_differenceOfMax_Agnostic_AboveCutOff	0.0586668	0.0275503	0.0535799	0.101331
SOK2_differenceOfMax_Agnostic_AboveCutOff	0.110414	0.034185	0.00336857	0.0160732
SPT23_differenceOfMax_Agnostic_AboveCutOff	0.094152	0.0386672	0.0261098	0.0629368
SPT2_differenceOfMax_Agnostic_AboveCutOff	0.0537514	0.0394432	0.213353	0.318443
STB1_differenceOfMax_Agnostic_AboveCutOff	-0.00262499	0.0453516	0.953487	0.980515
STB5_differenceOfMax_Agnostic_AboveCutOff	0.045478	0.0337688	0.210693	0.324386
SUT1_differenceOfMax_Agnostic_AboveCutOff	0.0600734	0.0341032	0.108941	0.183446
THO2_differenceOfMax_Agnostic_AboveCutOff	-0.0298515	0.0576691	0.584418	0.841735
UME1_differenceOfMax_Agnostic_AboveCutOff	-0.193454	5.75738	0.554529	0.980515
ZAP1_differenceOfMax_Agnostic_AboveCutOff	NA	NA	NA	NA
ABF1_differenceOfMax_Agnostic_AboveCutOff	0.518239	8.8454	3.04925e-05	0.980515
ACE2_differenceOfMax_Agnostic_AboveCutOff	0.0970108	0.0311229	0.00478241	0.0198434
ARG81_differenceOfMax_Agnostic_AboveCutOff	0.107856	0.0346702	0.00419392	0.0199104
ASH1_differenceOfMax_Agnostic_AboveCutOff	-0.0985495	0.0647218	0.0866216	0.255686
AZF1_differenceOfMax_Agnostic_AboveCutOff	NA	NA	NA	NA
CBF1_differenceOfMax_Agnostic_AboveCutOff	-0.154022	4.7977	0.637315	0.980515
GAL4_differenceOfMax_Agnostic_AboveCutOff	NA	NA	NA	NA
GAT3_differenceOfMax_Agnostic_AboveCutOff	-0.0279489	0.0562754	0.607968	0.855354
GCR2_differenceOfMax_Agnostic_AboveCutOff	-0.0874841	0.0865974	0.233836	0.511634
GTS1_differenceOfMax_Agnostic_AboveCutOff	0.0402205	0.0290962	0.210808	0.310537
HAC1_differenceOfMax_Agnostic_AboveCutOff	NA	NA	NA	NA
HAP2_differenceOfMax_Agnostic_AboveCutOff	0.0934261	0.0268588	0.00104905	0.0111912
IME1_differenceOfMax_Agnostic_AboveCutOff	-0.223141	4.92603	0.510893	0.980515
IXR1_differenceOfMax_Agnostic_AboveCutOff	NA	NA	NA	NA
JHD1_differenceOfMax_Agnostic_AboveCutOff	-0.0209695	0.0636014	0.729408	0.979775
MATA1_differenceOfMax_Agnostic_AboveCutOff	0.0622017	0.0292973	0.0546285	0.102215
MET32_differenceOfMax_Agnostic_AboveCutOff	NA	NA	NA	NA
MOT3_differenceOfMax_Agnostic_AboveCutOff	0.0559149	0.0377129	0.170393	0.269282
PDR1_differenceOfMax_Agnostic_AboveCutOff	-0.130502	4.0714	0.639891	0.980515
RFX1_differenceOfMax_Agnostic_AboveCutOff	0.184184	4.0714	0.0345124	0.980515
RGT1_differenceOfMax_Agnostic_AboveCutOff	NA	NA	NA	NA
RME1_differenceOfMax_Agnostic_AboveCutOff	0.058049	0.0397582	0.175265	0.277642
RTG3_differenceOfMax_Agnostic_AboveCutOff	0.0247079	0.0424574	0.58732	0.797001
SKO1_differenceOfMax_Agnostic_AboveCutOff	NA	NA	NA	NA
SNF1_differenceOfMax_Agnostic_AboveCutOff	NA	NA	NA	NA
SNT2_differenceOfMax_Agnostic_AboveCutOff	NA	NA	NA	NA
STB2_differenceOfMax_Agnostic_AboveCutOff	0.0800331	0.0409605	0.0732967	0.134199
STP1_differenceOfMax_Agnostic_AboveCutOff	0.0417103	0.0414968	0.357489	0.514595
SWI4_differenceOfMax_Agnostic_AboveCutOff	0.09544	0.030968	0.00459184	0.0202112
SWI6_differenceOfMax_Agnostic_AboveCutOff	0.0498299	0.0336745	0.169823	0.270381
THI2_differenceOfMax_Agnostic_AboveCutOff	3.00216	52.2604	0.000402587	0.980515
URC2_differenceOfMax_Agnostic_AboveCutOff	NA	NA	NA	NA
YHP1_differenceOfMax_Agnostic_AboveCutOff	-0.0317736	0.0553657	0.546975	0.801229
YRR1_differenceOfMax_Agnostic_AboveCutOff	NA	NA	NA	NA
ARG80_differenceOfMax_Agnostic_AboveCutOff	-5.31256	136.624	0.191005	0.980515
ARO80_differenceOfMax_Agnostic_AboveCutOff	NA	NA	NA	NA
ARR1_differenceOfMax_Agnostic_AboveCutOff	0.018505	0.0410079	0.662393	0.885446
CHA4_differenceOfMax_Agnostic_AboveCutOff	-0.318026	7.42595	0.343648	0.980515
CUP9_differenceOfMax_Agnostic_AboveCutOff	NA	NA	NA	NA
HMS1_differenceOfMax_Agnostic_AboveCutOff	-0.00445114	0.0485952	0.926781	0.980515
INO2_differenceOfMax_Agnostic_AboveCutOff	0.00652919	0.0481136	0.893998	0.980515
MCM1_differenceOfMax_Agnostic_AboveCutOff	-0.293484	6.68978	0.291536	0.980515
MET28_differenceOfMax_Agnostic_AboveCutOff	0.0156063	0.0450998	0.74026	0.966461
MGA1_differenceOfMax_Agnostic_AboveCutOff	0.0198163	0.0457355	0.672574	0.89493
PDR3_differenceOfMax_Agnostic_AboveCutOff	0.0577455	0.0394397	0.183343	0.276508
PHO4_differenceOfMax_Agnostic_AboveCutOff	NA	NA	NA	NA
PUT3_differenceOfMax_Agnostic_AboveCutOff	NA	NA	NA	NA
RAP1_differenceOfMax_Agnostic_AboveCutOff	0.00895547	0.0395373	0.826096	0.980515
SMP1_differenceOfMax_Agnostic_AboveCutOff	0.0599614	0.0370828	0.132135	0.226055
UGA3_differenceOfMax_Agnostic_AboveCutOff	-0.520282	13.839	0.194395	0.980515
YAP3_differenceOfMax_Agnostic_AboveCutOff	-0.00329749	0.049674	0.946943	0.980515
YAP5_differenceOfMax_Agnostic_AboveCutOff	-0.183601	4.07133	0.519914	0.980515
CUP2_differenceOfMax_Agnostic_AboveCutOff	NA	NA	NA	NA
GAL80_differenceOfMax_Agnostic_AboveCutOff	NA	NA	NA	NA
HAP5_differenceOfMax_Agnostic_AboveCutOff	-43.6121	1115.15	0.201433	0.980515
HSF1_differenceOfMax_Agnostic_AboveCutOff	0.0550591	0.0252516	0.0449028	0.0934386
INO4_differenceOfMax_Agnostic_AboveCutOff	-1.72168	38.5873	0.334662	0.980515
MATALPHA2_differenceOfMax_Agnostic_AboveCutOff	0.0889461	0.0405914	0.0463984	0.0922048
ORC1_differenceOfMax_Agnostic_AboveCutOff	0.0301526	0.0356719	0.429686	0.617142
SPT15_differenceOfMax_Agnostic_AboveCutOff	0.0802461	0.0327504	0.0260664	0.061666
STB4_differenceOfMax_Agnostic_AboveCutOff	NA	NA	NA	NA
SUM1_differenceOfMax_Agnostic_AboveCutOff	0.06229	0.0275625	0.0383976	0.0827945
UME6_differenceOfMax_Agnostic_AboveCutOff	0.260328	4.069	0.00284033	0.980515
YAP1_differenceOfMax_Agnostic_AboveCutOff	NA	NA	NA	NA
YDR026C_differenceOfMax_Agnostic_AboveCutOff	-9.7563	216.286	0.341358	0.980515
BAS1_differenceOfMax_Agnostic_AboveCutOff	-0.386271	8.97144	0.328839	0.980515
CAD1_differenceOfMax_Agnostic_AboveCutOff	-0.133508	4.0714	0.600539	0.980515
CIN5_differenceOfMax_Agnostic_AboveCutOff	0.0870268	0.0334268	0.0186011	0.0473417
CRZ1_differenceOfMax_Agnostic_AboveCutOff	0.11033	0.0359588	0.00489686	0.0207037
ERT1_differenceOfMax_Agnostic_AboveCutOff	-0.0370969	0.0621843	0.525858	0.788243
GCN4_differenceOfMax_Agnostic_AboveCutOff	0.0658014	0.0318128	0.0604028	0.11277
GCR1_differenceOfMax_Agnostic_AboveCutOff	-0.350429	7.33087	0.289748	0.980515
HAP1_differenceOfMax_Agnostic_AboveCutOff	0.0606872	0.0303054	0.0703613	0.124826
HAP3_differenceOfMax_Agnostic_AboveCutOff	-0.174557	5.461	0.644459	0.980515
LEU3_differenceOfMax_Agnostic_AboveCutOff	NA	NA	NA	NA
MAC1_differenceOfMax_Agnostic_AboveCutOff	0.00789646	0.0501995	0.877543	0.980515
MBP1_differenceOfMax_Agnostic_AboveCutOff	0.0640903	0.0320636	0.0668955	0.125034
MET31_differenceOfMax_Agnostic_AboveCutOff	NA	NA	NA	NA
NRG1_differenceOfMax_Agnostic_AboveCutOff	0.033247	0.0385796	0.420629	0.60549
PHD1_differenceOfMax_Agnostic_AboveCutOff	0.0661576	0.0395577	0.117001	0.207766
RLM1_differenceOfMax_Agnostic_AboveCutOff	0.0777111	0.0344672	0.042444	0.0837236
RPH1_differenceOfMax_Agnostic_AboveCutOff	0.0406421	0.0390253	0.32394	0.491542
RPN4_differenceOfMax_Agnostic_AboveCutOff	-0.132451	4.0714	0.614683	0.980515
SIP4_differenceOfMax_Agnostic_AboveCutOff	NA	NA	NA	NA
TEC1_differenceOfMax_Agnostic_AboveCutOff	-0.0106299	0.0615111	0.85959	0.980515
TYE7_differenceOfMax_Agnostic_AboveCutOff	0.0719666	0.0360846	0.0686362	0.125464
YAP6_differenceOfMax_Agnostic_AboveCutOff	0.0694442	0.0416743	0.122881	0.209173
YAP7_differenceOfMax_Agnostic_AboveCutOff	0.0615519	0.0345409	0.105741	0.178683
RDS2_differenceOfMax_Agnostic_AboveCutOff	0.12264	0.0392562	0.00338886	0.0196188
YGR067C_differenceOfMax_Agnostic_AboveCutOff	0.0510335	0.0444883	0.264333	0.430949
YML081W_differenceOfMax_Agnostic_AboveCutOff	0.104331	0.0409758	0.0153082	0.0526508
ASG1_differenceOfMax_Agnostic_AboveCutOff	0.0120881	0.0367884	0.752653	0.979893
CEP3_differenceOfMax_Agnostic_AboveCutOff	NA	NA	NA	NA
DOT6_differenceOfMax_Agnostic_AboveCutOff	0.00364433	0.052306	0.944783	0.980515
ECM22_differenceOfMax_Agnostic_AboveCutOff	-0.513032	14.2418	0.235749	0.980515
FHL1_differenceOfMax_Agnostic_AboveCutOff	0.0625411	0.0424092	0.162093	0.272195
GAT1_differenceOfMax_Agnostic_AboveCutOff	0.0970664	0.0309603	0.00258419	0.0194496
GAT4_differenceOfMax_Agnostic_AboveCutOff	-0.354202	8.27688	0.3474	0.980515
HAL9_differenceOfMax_Agnostic_AboveCutOff	0.0739005	0.0305764	0.0249145	0.0642957
LYS14_differenceOfMax_Agnostic_AboveCutOff	NA	NA	NA	NA
MIG2_differenceOfMax_Agnostic_AboveCutOff	0.0212223	0.0393874	0.614454	0.827493
MIG3_differenceOfMax_Agnostic_AboveCutOff	-0.133352	4.0714	0.602649	0.980515
NDT80_differenceOfMax_Agnostic_AboveCutOff	-0.319577	10.0061	0.645791	0.980515
NHP6A_differenceOfMax_Agnostic_AboveCutOff	0.0344579	0.0466302	0.483218	0.686181
NHP6B_differenceOfMax_Agnostic_AboveCutOff	0.0225825	0.0499075	0.668524	0.885166
OAF1_differenceOfMax_Agnostic_AboveCutOff	0.0325052	0.0521192	0.562129	0.767626
PHO2_differenceOfMax_Agnostic_AboveCutOff	-0.072179	0.0671623	0.225375	0.473572
RDR1_differenceOfMax_Agnostic_AboveCutOff	NA	NA	NA	NA
RDS1_differenceOfMax_Agnostic_AboveCutOff	NA	NA	NA	NA
SFL1_differenceOfMax_Agnostic_AboveCutOff	-0.0887695	0.078781	0.173961	0.442601
SFP1_differenceOfMax_Agnostic_AboveCutOff	0.112138	0.0330425	0.00212128	0.0131684
SRD1_differenceOfMax_Agnostic_AboveCutOff	NA	NA	NA	NA
STB3_differenceOfMax_Agnostic_AboveCutOff	-0.129878	4.0714	0.647722	0.980515
STP2_differenceOfMax_Agnostic_AboveCutOff	0.0917501	0.0423519	0.0420854	0.0957918
SUT2_differenceOfMax_Agnostic_AboveCutOff	-0.262866	8.26431	0.652395	0.980515
TBF1_differenceOfMax_Agnostic_AboveCutOff	0.0244954	0.0426213	0.593459	0.801229
TBS1_differenceOfMax_Agnostic_AboveCutOff	-0.130567	4.0714	0.639118	0.980515
TEA1_differenceOfMax_Agnostic_AboveCutOff	NA	NA	NA	NA
TOD6_differenceOfMax_Agnostic_AboveCutOff	0.0579864	0.0393796	0.175084	0.272737
YKL222C_differenceOfMax_Agnostic_AboveCutOff	0.00742233	0.0523262	0.889362	0.980515
YLL054C_differenceOfMax_Agnostic_AboveCutOff	NA	NA	NA	NA
YPR013C_differenceOfMax_Agnostic_AboveCutOff	0.0294808	0.0270812	0.327204	0.465085
YPR015C_differenceOfMax_Agnostic_AboveCutOff	NA	NA	NA	NA
YRM1_differenceOfMax_Agnostic_AboveCutOff	NA	NA	NA	NA
ABF2_differenceOfMeans_Agnostic_AboveCutOff	0.0412335	0.0427788	0.369018	0.538996
CAT8_differenceOfMeans_Agnostic_AboveCutOff	-0.0562047	0.0747596	0.400015	0.675778
CST6_differenceOfMeans_Agnostic_AboveCutOff	0.00656726	0.0528412	0.901854	0.980515
ECM23_differenceOfMeans_Agnostic_AboveCutOff	-0.0263684	0.0560859	0.628295	0.873888
EDS1_differenceOfMeans_Agnostic_AboveCutOff	NA	NA	NA	NA
FKH2_differenceOfMeans_Agnostic_AboveCutOff	-0.587073	13.0328	0.11731	0.980515
FZF1_differenceOfMeans_Agnostic_AboveCutOff	-0.0233695	0.0568695	0.668368	0.91097
GIS1_differenceOfMeans_Agnostic_AboveCutOff	0.100299	0.035439	0.00968522	0.0332699
GSM1_differenceOfMeans_Agnostic_AboveCutOff	0.0226674	0.0492433	0.653105	0.879357
GZF3_differenceOfMeans_Agnostic_AboveCutOff	0.0591038	0.043672	0.194399	0.322104
HCM1_differenceOfMeans_Agnostic_AboveCutOff	0.0335612	0.0484114	0.497609	0.717172
HMRA2_differenceOfMeans_Agnostic_AboveCutOff	0.05183	0.0381305	0.205756	0.320239
NHP10_differenceOfMeans_Agnostic_AboveCutOff	0.000161053	0.0426262	0.996987	0.99737
PDR8_differenceOfMeans_Agnostic_AboveCutOff	-0.0280831	0.0525197	0.580415	0.830113
REB1_differenceOfMeans_Agnostic_AboveCutOff	-5.95038	171.723	0.260405	0.980515
REI1_differenceOfMeans_Agnostic_AboveCutOff	0.07039	0.0414355	0.12242	0.199808
RSC30_differenceOfMeans_Agnostic_AboveCutOff	0.0430445	0.0393886	0.308288	0.462686
RSC3_differenceOfMeans_Agnostic_AboveCutOff	0.0369803	0.0387443	0.364714	0.545939
RSF2_differenceOfMeans_Agnostic_AboveCutOff	0.111146	0.0305336	0.000751692	0.00827261
STE12_differenceOfMeans_Agnostic_AboveCutOff	-0.0580925	0.0727425	0.359343	0.644852
STP3_differenceOfMeans_Agnostic_AboveCutOff	0.0486301	0.0383088	0.234002	0.363742
STP4_differenceOfMeans_Agnostic_AboveCutOff	0.0143973	0.0453141	0.755443	0.980515
SWI5_differenceOfMeans_Agnostic_AboveCutOff	0.0513498	0.0387597	0.212958	0.335558
TOS8_differenceOfMeans_Agnostic_AboveCutOff	-0.011639	0.0507562	0.816891	0.980515
USV1_differenceOfMeans_Agnostic_AboveCutOff	0.102668	0.0388716	0.0137135	0.0446979
YER130C_differenceOfMeans_Agnostic_AboveCutOff	0.0672529	0.0364785	0.0911812	0.162685
YER184C_differenceOfMeans_Agnostic_AboveCutOff	0.0584893	0.0454232	0.218271	0.354495
YLR278C_differenceOfMeans_Agnostic_AboveCutOff	0.00121844	0.0510356	0.980982	0.983985
YNR063W_differenceOfMeans_Agnostic_AboveCutOff	-0.0418006	0.0644856	0.471747	0.74999
YOX1_differenceOfMeans_Agnostic_AboveCutOff	0.0202603	0.0457789	0.663804	0.890465
YPR022C_differenceOfMeans_Agnostic_AboveCutOff	0.0208776	0.043534	0.640846	0.868359
YPR196W_differenceOfMeans_Agnostic_AboveCutOff	0.10375	0.0391135	0.0129702	0.0441268
ACA1_differenceOfMeans_Agnostic_AboveCutOff	NA	NA	NA	NA
ADR1_differenceOfMeans_Agnostic_AboveCutOff	NA	NA	NA	NA
AFT1_differenceOfMeans_Agnostic_AboveCutOff	-0.260498	5.74504	0.508213	0.980515
DAL81_differenceOfMeans_Agnostic_AboveCutOff	-0.132661	4.0714	0.611891	0.980515
DAL82_differenceOfMeans_Agnostic_AboveCutOff	-0.226316	4.99221	0.508562	0.980515
DIG1_differenceOfMeans_Agnostic_AboveCutOff	NA	NA	NA	NA
FKH1_differenceOfMeans_Agnostic_AboveCutOff	-0.0291294	0.0620823	0.614281	0.873888
MIG1_differenceOfMeans_Agnostic_AboveCutOff	-0.130361	4.0714	0.641673	0.980515
OPI1_differenceOfMeans_Agnostic_AboveCutOff	-8.27356	252.016	0.222004	0.980515
PIP2_differenceOfMeans_Agnostic_AboveCutOff	-0.130598	4.0714	0.63872	0.980515
PPR1_differenceOfMeans_Agnostic_AboveCutOff	-0.126517	4.0714	0.687729	0.980515
RGM1_differenceOfMeans_Agnostic_AboveCutOff	-0.134895	4.0714	0.581502	0.980515
RTG1_differenceOfMeans_Agnostic_AboveCutOff	NA	NA	NA	NA
SKN7_differenceOfMeans_Agnostic_AboveCutOff	-0.357288	8.26183	0.320706	0.980515
UPC2_differenceOfMeans_Agnostic_AboveCutOff	-0.182613	5.73333	0.650194	0.980515
WAR1_differenceOfMeans_Agnostic_AboveCutOff	NA	NA	NA	NA
XBP1_differenceOfMeans_Agnostic_AboveCutOff	-9.14227	203.183	0.0549117	0.980515
AFT2_differenceOfMeans_Agnostic_AboveCutOff	0.0201043	0.0417161	0.643987	0.866968
MATA2_differenceOfMeans_Agnostic_AboveCutOff	0.131632	0.0376773	0.00123984	0.0111912
MSN1_differenceOfMeans_Agnostic_AboveCutOff	0.0733299	0.0297705	0.0259765	0.0610026
NRG2_differenceOfMeans_Agnostic_AboveCutOff	0.0668544	0.0367117	0.0975128	0.167367
ROX1_differenceOfMeans_Agnostic_AboveCutOff	0.101839	0.0407676	0.0197275	0.0576845
DAL80_differenceOfMeans_Agnostic_AboveCutOff	0.0213464	0.0493494	0.670391	0.89493
GLN3_differenceOfMeans_Agnostic_AboveCutOff	0.0294907	0.0389275	0.472677	0.672925
HAP4_differenceOfMeans_Agnostic_AboveCutOff	-0.329062	8.86233	0.407311	0.980515
MET4_differenceOfMeans_Agnostic_AboveCutOff	-0.136574	4.0714	0.557813	0.980515
MOT2_differenceOfMeans_Agnostic_AboveCutOff	-0.00927531	0.0591975	0.872494	0.980515
MSN2_differenceOfMeans_Agnostic_AboveCutOff	0.00916242	0.0500258	0.858167	0.980515
MSN4_differenceOfMeans_Agnostic_AboveCutOff	0.0675466	0.039587	0.118728	0.198722
NDD1_differenceOfMeans_Agnostic_AboveCutOff	0.00792289	0.0454893	0.864735	0.980515
RIM101_differenceOfMeans_Agnostic_AboveCutOff	0.0586668	0.0275503	0.0535799	0.101331
SOK2_differenceOfMeans_Agnostic_AboveCutOff	0.110414	0.034185	0.00336857	0.0160732
SPT23_differenceOfMeans_Agnostic_AboveCutOff	0.094152	0.0386672	0.0261098	0.0629368
SPT2_differenceOfMeans_Agnostic_AboveCutOff	0.0537514	0.0394432	0.213353	0.318443
STB1_differenceOfMeans_Agnostic_AboveCutOff	-0.00262499	0.0453516	0.953487	0.980515
STB5_differenceOfMeans_Agnostic_AboveCutOff	0.046735	0.0336243	0.196916	0.307677
SUT1_differenceOfMeans_Agnostic_AboveCutOff	0.0600734	0.0341032	0.108941	0.183446
THO2_differenceOfMeans_Agnostic_AboveCutOff	-0.0298515	0.0576691	0.584418	0.841735
UME1_differenceOfMeans_Agnostic_AboveCutOff	-0.193454	5.75738	0.554529	0.980515
ZAP1_differenceOfMeans_Agnostic_AboveCutOff	NA	NA	NA	NA
ABF1_differenceOfMeans_Agnostic_AboveCutOff	0.518239	8.8454	3.04925e-05	0.980515
ACE2_differenceOfMeans_Agnostic_AboveCutOff	0.0970108	0.0311229	0.00478241	0.0198434
ARG81_differenceOfMeans_Agnostic_AboveCutOff	0.107659	0.0346602	0.00425607	0.020085
ASH1_differenceOfMeans_Agnostic_AboveCutOff	-0.099972	0.06519	0.0835722	0.252029
AZF1_differenceOfMeans_Agnostic_AboveCutOff	NA	NA	NA	NA
CBF1_differenceOfMeans_Agnostic_AboveCutOff	-0.156235	4.86662	0.637315	0.980515
GAL4_differenceOfMeans_Agnostic_AboveCutOff	NA	NA	NA	NA
GAT3_differenceOfMeans_Agnostic_AboveCutOff	-0.0279489	0.0562754	0.607968	0.855354
GCR2_differenceOfMeans_Agnostic_AboveCutOff	-0.0874841	0.0865974	0.233836	0.511634
GTS1_differenceOfMeans_Agnostic_AboveCutOff	0.0402205	0.0290962	0.210808	0.310537
HAC1_differenceOfMeans_Agnostic_AboveCutOff	NA	NA	NA	NA
HAP2_differenceOfMeans_Agnostic_AboveCutOff	0.0938179	0.026901	0.000999738	0.0111912
IME1_differenceOfMeans_Agnostic_AboveCutOff	-0.223141	4.92603	0.510893	0.980515
IXR1_differenceOfMeans_Agnostic_AboveCutOff	NA	NA	NA	NA
JHD1_differenceOfMeans_Agnostic_AboveCutOff	-0.0209695	0.0636014	0.729408	0.979775
MATA1_differenceOfMeans_Agnostic_AboveCutOff	0.0622017	0.0292973	0.0546285	0.102215
MET32_differenceOfMeans_Agnostic_AboveCutOff	NA	NA	NA	NA
MOT3_differenceOfMeans_Agnostic_AboveCutOff	0.0559149	0.0377129	0.170393	0.269282
PDR1_differenceOfMeans_Agnostic_AboveCutOff	-0.130502	4.0714	0.639891	0.980515
RFX1_differenceOfMeans_Agnostic_AboveCutOff	0.184184	4.0714	0.0345124	0.980515
RGT1_differenceOfMeans_Agnostic_AboveCutOff	NA	NA	NA	NA
RME1_differenceOfMeans_Agnostic_AboveCutOff	0.058049	0.0397582	0.175265	0.277642
RTG3_differenceOfMeans_Agnostic_AboveCutOff	0.0247079	0.0424574	0.58732	0.797001
SKO1_differenceOfMeans_Agnostic_AboveCutOff	NA	NA	NA	NA
SNF1_differenceOfMeans_Agnostic_AboveCutOff	NA	NA	NA	NA
SNT2_differenceOfMeans_Agnostic_AboveCutOff	NA	NA	NA	NA
STB2_differenceOfMeans_Agnostic_AboveCutOff	0.0799491	0.0409176	0.0732967	0.134199
STP1_differenceOfMeans_Agnostic_AboveCutOff	0.0417103	0.0414968	0.357489	0.514595
SWI4_differenceOfMeans_Agnostic_AboveCutOff	0.09544	0.030968	0.00459184	0.0202112
SWI6_differenceOfMeans_Agnostic_AboveCutOff	0.0488782	0.0338632	0.180171	0.284657
THI2_differenceOfMeans_Agnostic_AboveCutOff	3.00216	52.2604	0.000402587	0.980515
URC2_differenceOfMeans_Agnostic_AboveCutOff	NA	NA	NA	NA
YHP1_differenceOfMeans_Agnostic_AboveCutOff	-0.0317736	0.0553657	0.546975	0.801229
YRR1_differenceOfMeans_Agnostic_AboveCutOff	NA	NA	NA	NA
ARG80_differenceOfMeans_Agnostic_AboveCutOff	-5.31256	136.624	0.191005	0.980515
ARO80_differenceOfMeans_Agnostic_AboveCutOff	NA	NA	NA	NA
ARR1_differenceOfMeans_Agnostic_AboveCutOff	0.018505	0.0410079	0.662393	0.885446
CHA4_differenceOfMeans_Agnostic_AboveCutOff	-0.318026	7.42595	0.343648	0.980515
CUP9_differenceOfMeans_Agnostic_AboveCutOff	NA	NA	NA	NA
HMS1_differenceOfMeans_Agnostic_AboveCutOff	-0.00355373	0.0483837	0.941297	0.980515
INO2_differenceOfMeans_Agnostic_AboveCutOff	0.00652919	0.0481136	0.893998	0.980515
MCM1_differenceOfMeans_Agnostic_AboveCutOff	-0.294004	6.69487	0.291536	0.980515
MET28_differenceOfMeans_Agnostic_AboveCutOff	0.0156063	0.0450998	0.74026	0.966461
MGA1_differenceOfMeans_Agnostic_AboveCutOff	0.0177577	0.0460177	0.705931	0.932102
PDR3_differenceOfMeans_Agnostic_AboveCutOff	0.0582192	0.0393694	0.179167	0.270474
PHO4_differenceOfMeans_Agnostic_AboveCutOff	NA	NA	NA	NA
PUT3_differenceOfMeans_Agnostic_AboveCutOff	NA	NA	NA	NA
RAP1_differenceOfMeans_Agnostic_AboveCutOff	0.00895547	0.0395373	0.826096	0.980515
SMP1_differenceOfMeans_Agnostic_AboveCutOff	0.0599809	0.037085	0.132041	0.226043
UGA3_differenceOfMeans_Agnostic_AboveCutOff	-0.520282	13.839	0.194395	0.980515
YAP3_differenceOfMeans_Agnostic_AboveCutOff	-0.00329749	0.049674	0.946943	0.980515
YAP5_differenceOfMeans_Agnostic_AboveCutOff	-0.183601	4.07133	0.519914	0.980515
CUP2_differenceOfMeans_Agnostic_AboveCutOff	NA	NA	NA	NA
GAL80_differenceOfMeans_Agnostic_AboveCutOff	NA	NA	NA	NA
HAP5_differenceOfMeans_Agnostic_AboveCutOff	-43.6121	1115.15	0.201433	0.980515
HSF1_differenceOfMeans_Agnostic_AboveCutOff	0.0550591	0.0252516	0.0449028	0.0934386
INO4_differenceOfMeans_Agnostic_AboveCutOff	-1.72168	38.5873	0.334662	0.980515
MATALPHA2_differenceOfMeans_Agnostic_AboveCutOff	0.0889461	0.0405914	0.0463984	0.0922048
ORC1_differenceOfMeans_Agnostic_AboveCutOff	0.0301526	0.0356719	0.429686	0.617142
SPT15_differenceOfMeans_Agnostic_AboveCutOff	0.080526	0.0327356	0.0254964	0.0610026
STB4_differenceOfMeans_Agnostic_AboveCutOff	NA	NA	NA	NA
SUM1_differenceOfMeans_Agnostic_AboveCutOff	0.06229	0.0275625	0.0383976	0.0827945
UME6_differenceOfMeans_Agnostic_AboveCutOff	0.260328	4.069	0.00284033	0.980515
YAP1_differenceOfMeans_Agnostic_AboveCutOff	NA	NA	NA	NA
YDR026C_differenceOfMeans_Agnostic_AboveCutOff	-9.7563	216.286	0.341358	0.980515
BAS1_differenceOfMeans_Agnostic_AboveCutOff	-0.386271	8.97144	0.328839	0.980515
CAD1_differenceOfMeans_Agnostic_AboveCutOff	-0.133508	4.0714	0.600539	0.980515
CIN5_differenceOfMeans_Agnostic_AboveCutOff	0.0869437	0.0333949	0.0186011	0.0473417
CRZ1_differenceOfMeans_Agnostic_AboveCutOff	0.11033	0.0359588	0.00489686	0.0207037
ERT1_differenceOfMeans_Agnostic_AboveCutOff	-0.0370969	0.0621843	0.525858	0.788243
GCN4_differenceOfMeans_Agnostic_AboveCutOff	0.0649421	0.0319874	0.0652376	0.119495
GCR1_differenceOfMeans_Agnostic_AboveCutOff	-0.350429	7.33087	0.289748	0.980515
HAP1_differenceOfMeans_Agnostic_AboveCutOff	0.0606872	0.0303054	0.0703613	0.124826
HAP3_differenceOfMeans_Agnostic_AboveCutOff	-0.174557	5.461	0.644459	0.980515
LEU3_differenceOfMeans_Agnostic_AboveCutOff	NA	NA	NA	NA
MAC1_differenceOfMeans_Agnostic_AboveCutOff	0.00789646	0.0501995	0.877543	0.980515
MBP1_differenceOfMeans_Agnostic_AboveCutOff	0.0650679	0.0321329	0.063727	0.120448
MET31_differenceOfMeans_Agnostic_AboveCutOff	NA	NA	NA	NA
NRG1_differenceOfMeans_Agnostic_AboveCutOff	0.033247	0.0385796	0.420629	0.60549
PHD1_differenceOfMeans_Agnostic_AboveCutOff	0.0680867	0.0392855	0.104889	0.190342
RLM1_differenceOfMeans_Agnostic_AboveCutOff	0.0776721	0.0341591	0.0407339	0.0807109
RPH1_differenceOfMeans_Agnostic_AboveCutOff	0.0406421	0.0390253	0.32394	0.491542
RPN4_differenceOfMeans_Agnostic_AboveCutOff	-0.132451	4.0714	0.614683	0.980515
SIP4_differenceOfMeans_Agnostic_AboveCutOff	NA	NA	NA	NA
TEC1_differenceOfMeans_Agnostic_AboveCutOff	-0.0106299	0.0615111	0.85959	0.980515
TYE7_differenceOfMeans_Agnostic_AboveCutOff	0.0724229	0.0364955	0.0698059	0.12779
YAP6_differenceOfMeans_Agnostic_AboveCutOff	0.0696723	0.0417041	0.121955	0.208018
YAP7_differenceOfMeans_Agnostic_AboveCutOff	0.061869	0.0344945	0.103557	0.175178
RDS2_differenceOfMeans_Agnostic_AboveCutOff	0.122593	0.0392326	0.00338194	0.0196188
YGR067C_differenceOfMeans_Agnostic_AboveCutOff	0.052596	0.0444265	0.249653	0.4076
YML081W_differenceOfMeans_Agnostic_AboveCutOff	0.10655	0.0408306	0.0130237	0.0467905
ASG1_differenceOfMeans_Agnostic_AboveCutOff	0.0120881	0.0367884	0.752653	0.979893
CEP3_differenceOfMeans_Agnostic_AboveCutOff	NA	NA	NA	NA
DOT6_differenceOfMeans_Agnostic_AboveCutOff	0.00364433	0.052306	0.944783	0.980515
ECM22_differenceOfMeans_Agnostic_AboveCutOff	-0.513032	14.2418	0.235749	0.980515
FHL1_differenceOfMeans_Agnostic_AboveCutOff	0.0625411	0.0424092	0.162093	0.272195
GAT1_differenceOfMeans_Agnostic_AboveCutOff	0.0970664	0.0309603	0.00258419	0.0194496
GAT4_differenceOfMeans_Agnostic_AboveCutOff	-0.354202	8.27688	0.3474	0.980515
HAL9_differenceOfMeans_Agnostic_AboveCutOff	0.0730659	0.0305555	0.0267203	0.0672154
LYS14_differenceOfMeans_Agnostic_AboveCutOff	NA	NA	NA	NA
MIG2_differenceOfMeans_Agnostic_AboveCutOff	0.0212223	0.0393874	0.614454	0.827493
MIG3_differenceOfMeans_Agnostic_AboveCutOff	-0.133352	4.0714	0.602649	0.980515
NDT80_differenceOfMeans_Agnostic_AboveCutOff	-0.319577	10.0061	0.645791	0.980515
NHP6A_differenceOfMeans_Agnostic_AboveCutOff	0.0352196	0.0465646	0.473375	0.673631
NHP6B_differenceOfMeans_Agnostic_AboveCutOff	0.0228208	0.0499389	0.665552	0.881237
OAF1_differenceOfMeans_Agnostic_AboveCutOff	0.0325052	0.0521192	0.562129	0.767626
PHO2_differenceOfMeans_Agnostic_AboveCutOff	-0.0721494	0.0671348	0.225375	0.473572
RDR1_differenceOfMeans_Agnostic_AboveCutOff	NA	NA	NA	NA
RDS1_differenceOfMeans_Agnostic_AboveCutOff	NA	NA	NA	NA
SFL1_differenceOfMeans_Agnostic_AboveCutOff	-0.0887695	0.078781	0.173961	0.442601
SFP1_differenceOfMeans_Agnostic_AboveCutOff	0.111074	0.033018	0.00234285	0.0135779
SRD1_differenceOfMeans_Agnostic_AboveCutOff	NA	NA	NA	NA
STB3_differenceOfMeans_Agnostic_AboveCutOff	-0.129878	4.0714	0.647722	0.980515
STP2_differenceOfMeans_Agnostic_AboveCutOff	0.0917501	0.0423519	0.0420854	0.0957918
SUT2_differenceOfMeans_Agnostic_AboveCutOff	-0.262866	8.26431	0.652395	0.980515
TBF1_differenceOfMeans_Agnostic_AboveCutOff	0.0244954	0.0426213	0.593459	0.801229
TBS1_differenceOfMeans_Agnostic_AboveCutOff	-0.130567	4.0714	0.639118	0.980515
TEA1_differenceOfMeans_Agnostic_AboveCutOff	NA	NA	NA	NA
TOD6_differenceOfMeans_Agnostic_AboveCutOff	0.0579864	0.0393796	0.175084	0.272737
YKL222C_differenceOfMeans_Agnostic_AboveCutOff	0.00742233	0.0523262	0.889362	0.980515
YLL054C_differenceOfMeans_Agnostic_AboveCutOff	NA	NA	NA	NA
YPR013C_differenceOfMeans_Agnostic_AboveCutOff	0.0294808	0.0270812	0.327204	0.465085
YPR015C_differenceOfMeans_Agnostic_AboveCutOff	NA	NA	NA	NA
YRM1_differenceOfMeans_Agnostic_AboveCutOff	NA	NA	NA	NA
ABF2_deltaSignificantBindingSites_Agnostic_AboveCutOff	0.026931	0.0485955	0.599738	0.816578
CAT8_deltaSignificantBindingSites_Agnostic_AboveCutOff	-0.0690825	0.0864319	0.359239	0.644852
CST6_deltaSignificantBindingSites_Agnostic_AboveCutOff	0.0126879	0.0514925	0.808169	0.980515
ECM23_deltaSignificantBindingSites_Agnostic_AboveCutOff	-0.0243355	0.0554123	0.650143	0.891708
EDS1_deltaSignificantBindingSites_Agnostic_AboveCutOff	NA	NA	NA	NA
FKH2_deltaSignificantBindingSites_Agnostic_AboveCutOff	-0.587073	13.0328	0.11731	0.980515
FZF1_deltaSignificantBindingSites_Agnostic_AboveCutOff	-0.0233695	0.0568695	0.668368	0.91097
GIS1_deltaSignificantBindingSites_Agnostic_AboveCutOff	0.103647	0.0350753	0.00695747	0.0261006
GSM1_deltaSignificantBindingSites_Agnostic_AboveCutOff	0.0202846	0.0512857	0.699579	0.924132
GZF3_deltaSignificantBindingSites_Agnostic_AboveCutOff	0.0260444	0.0467296	0.585164	0.814044
HCM1_deltaSignificantBindingSites_Agnostic_AboveCutOff	0.0390015	0.0473951	0.422135	0.629175
HMRA2_deltaSignificantBindingSites_Agnostic_AboveCutOff	0.042921	0.0371963	0.281256	0.426724
NHP10_deltaSignificantBindingSites_Agnostic_AboveCutOff	0.000966152	0.0425066	0.981921	0.984521
PDR8_deltaSignificantBindingSites_Agnostic_AboveCutOff	-0.0428341	0.056015	0.421788	0.668487
REB1_deltaSignificantBindingSites_Agnostic_AboveCutOff	-0.299098	6.43474	0.454059	0.980515
REI1_deltaSignificantBindingSites_Agnostic_AboveCutOff	0.0703533	0.039739	0.106595	0.181586
RSC30_deltaSignificantBindingSites_Agnostic_AboveCutOff	0.0308613	0.041828	0.486959	0.686181
RSC3_deltaSignificantBindingSites_Agnostic_AboveCutOff	0.0638561	0.0362547	0.105234	0.183446
RSF2_deltaSignificantBindingSites_Agnostic_AboveCutOff	0.111012	0.0307032	0.000828368	0.0086421
STE12_deltaSignificantBindingSites_Agnostic_AboveCutOff	-0.0470888	0.0682526	0.442564	0.718599
STP3_deltaSignificantBindingSites_Agnostic_AboveCutOff	0.0500929	0.0367373	0.203528	0.318436
STP4_deltaSignificantBindingSites_Agnostic_AboveCutOff	0.0131729	0.0452338	0.775353	0.980515
SWI5_deltaSignificantBindingSites_Agnostic_AboveCutOff	0.0322008	0.0423243	0.464383	0.670801
TOS8_deltaSignificantBindingSites_Agnostic_AboveCutOff	-0.0185961	0.0519281	0.716146	0.955928
USV1_deltaSignificantBindingSites_Agnostic_AboveCutOff	0.110228	0.0371463	0.00601462	0.0255416
YER130C_deltaSignificantBindingSites_Agnostic_AboveCutOff	0.0673284	0.0370569	0.0957559	0.168444
YER184C_deltaSignificantBindingSites_Agnostic_AboveCutOff	0.0712269	0.0444452	0.129194	0.229924
YLR278C_deltaSignificantBindingSites_Agnostic_AboveCutOff	-0.016572	0.0540262	0.754049	0.980515
YNR063W_deltaSignificantBindingSites_Agnostic_AboveCutOff	-0.0375471	0.0620817	0.507123	0.781252
YOX1_deltaSignificantBindingSites_Agnostic_AboveCutOff	0.0119143	0.0482956	0.807369	0.980515
YPR022C_deltaSignificantBindingSites_Agnostic_AboveCutOff	0.0165874	0.0445895	0.715878	0.943614
YPR196W_deltaSignificantBindingSites_Agnostic_AboveCutOff	0.10736	0.0388446	0.00974216	0.0369841
ACA1_deltaSignificantBindingSites_Agnostic_AboveCutOff	NA	NA	NA	NA
ADR1_deltaSignificantBindingSites_Agnostic_AboveCutOff	NA	NA	NA	NA
AFT1_deltaSignificantBindingSites_Agnostic_AboveCutOff	-0.260936	5.75471	0.508213	0.980515
DAL81_deltaSignificantBindingSites_Agnostic_AboveCutOff	-0.132661	4.0714	0.611891	0.980515
DAL82_deltaSignificantBindingSites_Agnostic_AboveCutOff	-0.225944	4.98208	0.508562	0.980515
DIG1_deltaSignificantBindingSites_Agnostic_AboveCutOff	NA	NA	NA	NA
FKH1_deltaSignificantBindingSites_Agnostic_AboveCutOff	-0.0294569	0.062265	0.611451	0.871536
MIG1_deltaSignificantBindingSites_Agnostic_AboveCutOff	-0.130361	4.0714	0.641673	0.980515
OPI1_deltaSignificantBindingSites_Agnostic_AboveCutOff	-0.427582	8.19225	0.258641	0.980515
PIP2_deltaSignificantBindingSites_Agnostic_AboveCutOff	-0.130598	4.0714	0.63872	0.980515
PPR1_deltaSignificantBindingSites_Agnostic_AboveCutOff	-0.126517	4.0714	0.687729	0.980515
RGM1_deltaSignificantBindingSites_Agnostic_AboveCutOff	-0.134895	4.0714	0.581502	0.980515
RTG1_deltaSignificantBindingSites_Agnostic_AboveCutOff	NA	NA	NA	NA
SKN7_deltaSignificantBindingSites_Agnostic_AboveCutOff	-0.354103	8.21536	0.320706	0.980515
UPC2_deltaSignificantBindingSites_Agnostic_AboveCutOff	-0.183379	5.75738	0.650194	0.980515
WAR1_deltaSignificantBindingSites_Agnostic_AboveCutOff	NA	NA	NA	NA
XBP1_deltaSignificantBindingSites_Agnostic_AboveCutOff	-0.639237	12.153	0.0839012	0.980515
AFT2_deltaSignificantBindingSites_Agnostic_AboveCutOff	0.018713	0.0421566	0.669519	0.890465
MATA2_deltaSignificantBindingSites_Agnostic_AboveCutOff	0.125662	0.0362875	0.00138812	0.0113405
MSN1_deltaSignificantBindingSites_Agnostic_AboveCutOff	0.0729186	0.0296165	0.026179	0.0610026
NRG2_deltaSignificantBindingSites_Agnostic_AboveCutOff	0.0674282	0.0359851	0.0884727	0.154093
ROX1_deltaSignificantBindingSites_Agnostic_AboveCutOff	0.100178	0.0410528	0.0225152	0.0627301
DAL80_deltaSignificantBindingSites_Agnostic_AboveCutOff	0.0213464	0.0493494	0.670391	0.89493
GLN3_deltaSignificantBindingSites_Agnostic_AboveCutOff	0.0279493	0.0395525	0.501767	0.70729
HAP4_deltaSignificantBindingSites_Agnostic_AboveCutOff	-0.320943	8.63184	0.407311	0.980515
MET4_deltaSignificantBindingSites_Agnostic_AboveCutOff	-0.136574	4.0714	0.557813	0.980515
MOT2_deltaSignificantBindingSites_Agnostic_AboveCutOff	-0.00200901	0.0560804	0.971282	0.980515
MSN2_deltaSignificantBindingSites_Agnostic_AboveCutOff	-0.00443845	0.0529738	0.932275	0.980515
MSN4_deltaSignificantBindingSites_Agnostic_AboveCutOff	0.067326	0.0391442	0.115946	0.194738
NDD1_deltaSignificantBindingSites_Agnostic_AboveCutOff	0.000752707	0.0447287	0.986611	0.988859
RIM101_deltaSignificantBindingSites_Agnostic_AboveCutOff	0.0586668	0.0275503	0.0535799	0.101331
SOK2_deltaSignificantBindingSites_Agnostic_AboveCutOff	0.106666	0.0345298	0.00500023	0.0202112
SPT23_deltaSignificantBindingSites_Agnostic_AboveCutOff	0.101435	0.039558	0.0193085	0.0509387
SPT2_deltaSignificantBindingSites_Agnostic_AboveCutOff	0.0416597	0.0403195	0.340627	0.496933
STB1_deltaSignificantBindingSites_Agnostic_AboveCutOff	-0.00616868	0.0458341	0.890929	0.980515
STB5_deltaSignificantBindingSites_Agnostic_AboveCutOff	0.041097	0.0333882	0.253922	0.383546
SUT1_deltaSignificantBindingSites_Agnostic_AboveCutOff	0.0579699	0.0351929	0.134216	0.215715
THO2_deltaSignificantBindingSites_Agnostic_AboveCutOff	-0.0286212	0.057591	0.601148	0.855354
UME1_deltaSignificantBindingSites_Agnostic_AboveCutOff	-0.193454	5.75738	0.554529	0.980515
ZAP1_deltaSignificantBindingSites_Agnostic_AboveCutOff	NA	NA	NA	NA
ABF1_deltaSignificantBindingSites_Agnostic_AboveCutOff	0.518147	8.86224	3.04925e-05	0.980515
ACE2_deltaSignificantBindingSites_Agnostic_AboveCutOff	0.0955231	0.0305544	0.00474543	0.0196188
ARG81_deltaSignificantBindingSites_Agnostic_AboveCutOff	0.107474	0.0346786	0.00433358	0.0202112
ASH1_deltaSignificantBindingSites_Agnostic_AboveCutOff	-0.108442	0.0674445	0.0684281	0.228397
AZF1_deltaSignificantBindingSites_Agnostic_AboveCutOff	NA	NA	NA	NA
CBF1_deltaSignificantBindingSites_Agnostic_AboveCutOff	-0.146124	4.55168	0.637315	0.980515
GAL4_deltaSignificantBindingSites_Agnostic_AboveCutOff	NA	NA	NA	NA
GAT3_deltaSignificantBindingSites_Agnostic_AboveCutOff	-0.0208203	0.0548248	0.697408	0.936906
GCR2_deltaSignificantBindingSites_Agnostic_AboveCutOff	-0.0874841	0.0865974	0.233836	0.511634
GTS1_deltaSignificantBindingSites_Agnostic_AboveCutOff	0.0462562	0.0288413	0.146852	0.22972
HAC1_deltaSignificantBindingSites_Agnostic_AboveCutOff	NA	NA	NA	NA
HAP2_deltaSignificantBindingSites_Agnostic_AboveCutOff	0.0842408	0.0280479	0.0031779	0.0235692
IME1_deltaSignificantBindingSites_Agnostic_AboveCutOff	-0.225662	4.97737	0.510893	0.980515
IXR1_deltaSignificantBindingSites_Agnostic_AboveCutOff	NA	NA	NA	NA
JHD1_deltaSignificantBindingSites_Agnostic_AboveCutOff	-0.0197881	0.0625752	0.740679	0.980515
MATA1_deltaSignificantBindingSites_Agnostic_AboveCutOff	0.062575	0.029146	0.0516982	0.0987395
MET32_deltaSignificantBindingSites_Agnostic_AboveCutOff	NA	NA	NA	NA
MOT3_deltaSignificantBindingSites_Agnostic_AboveCutOff	0.0552887	0.0397795	0.197767	0.307677
PDR1_deltaSignificantBindingSites_Agnostic_AboveCutOff	NA	NA	NA	NA
RFX1_deltaSignificantBindingSites_Agnostic_AboveCutOff	0.184184	4.0714	0.0345124	0.980515
RGT1_deltaSignificantBindingSites_Agnostic_AboveCutOff	NA	NA	NA	NA
RME1_deltaSignificantBindingSites_Agnostic_AboveCutOff	0.0583274	0.0407902	0.183836	0.290264
RTG3_deltaSignificantBindingSites_Agnostic_AboveCutOff	0.0267085	0.0422255	0.556484	0.762236
SKO1_deltaSignificantBindingSites_Agnostic_AboveCutOff	NA	NA	NA	NA
SNF1_deltaSignificantBindingSites_Agnostic_AboveCutOff	NA	NA	NA	NA
SNT2_deltaSignificantBindingSites_Agnostic_AboveCutOff	NA	NA	NA	NA
STB2_deltaSignificantBindingSites_Agnostic_AboveCutOff	0.0834207	0.0417095	0.0666469	0.12485
STP1_deltaSignificantBindingSites_Agnostic_AboveCutOff	0.0414792	0.0407921	0.351947	0.508394
SWI4_deltaSignificantBindingSites_Agnostic_AboveCutOff	0.091929	0.0313584	0.00748286	0.027361
SWI6_deltaSignificantBindingSites_Agnostic_AboveCutOff	0.0503452	0.0313817	0.136955	0.22969
THI2_deltaSignificantBindingSites_Agnostic_AboveCutOff	NA	NA	NA	NA
URC2_deltaSignificantBindingSites_Agnostic_AboveCutOff	NA	NA	NA	NA
YHP1_deltaSignificantBindingSites_Agnostic_AboveCutOff	-0.0317736	0.0553657	0.546975	0.801229
YRR1_deltaSignificantBindingSites_Agnostic_AboveCutOff	NA	NA	NA	NA
ARG80_deltaSignificantBindingSites_Agnostic_AboveCutOff	-0.478286	9.05821	0.228517	0.980515
ARO80_deltaSignificantBindingSites_Agnostic_AboveCutOff	NA	NA	NA	NA
ARR1_deltaSignificantBindingSites_Agnostic_AboveCutOff	0.0163574	0.0413452	0.700879	0.924132
CHA4_deltaSignificantBindingSites_Agnostic_AboveCutOff	-0.320262	7.46388	0.343648	0.980515
CUP9_deltaSignificantBindingSites_Agnostic_AboveCutOff	NA	NA	NA	NA
HMS1_deltaSignificantBindingSites_Agnostic_AboveCutOff	0.00855785	0.0476109	0.858297	0.980515
INO2_deltaSignificantBindingSites_Agnostic_AboveCutOff	0.0101407	0.050722	0.845506	0.980515
MCM1_deltaSignificantBindingSites_Agnostic_AboveCutOff	-0.363883	7.31024	0.291537	0.980515
MET28_deltaSignificantBindingSites_Agnostic_AboveCutOff	0.0137369	0.0451314	0.769686	0.980515
MGA1_deltaSignificantBindingSites_Agnostic_AboveCutOff	0.0279729	0.0456407	0.55559	0.775442
PDR3_deltaSignificantBindingSites_Agnostic_AboveCutOff	0.0679472	0.036757	0.0921477	0.161524
PHO4_deltaSignificantBindingSites_Agnostic_AboveCutOff	NA	NA	NA	NA
PUT3_deltaSignificantBindingSites_Agnostic_AboveCutOff	NA	NA	NA	NA
RAP1_deltaSignificantBindingSites_Agnostic_AboveCutOff	0.0144558	0.0390103	0.723209	0.944554
SMP1_deltaSignificantBindingSites_Agnostic_AboveCutOff	0.0704468	0.034234	0.0593886	0.114072
UGA3_deltaSignificantBindingSites_Agnostic_AboveCutOff	-0.519692	13.842	0.194395	0.980515
YAP3_deltaSignificantBindingSites_Agnostic_AboveCutOff	0.00760082	0.0484516	0.876054	0.980515
YAP5_deltaSignificantBindingSites_Agnostic_AboveCutOff	-0.183504	4.07048	0.519914	0.980515
CUP2_deltaSignificantBindingSites_Agnostic_AboveCutOff	NA	NA	NA	NA
GAL80_deltaSignificantBindingSites_Agnostic_AboveCutOff	NA	NA	NA	NA
HAP5_deltaSignificantBindingSites_Agnostic_AboveCutOff	-0.350802	8.20858	0.344925	0.980515
HSF1_deltaSignificantBindingSites_Agnostic_AboveCutOff	0.0557241	0.025223	0.0419503	0.0903988
INO4_deltaSignificantBindingSites_Agnostic_AboveCutOff	-0.323405	8.6562	0.388591	0.980515
MATALPHA2_deltaSignificantBindingSites_Agnostic_AboveCutOff	0.0911526	0.0397969	0.0359787	0.0786505
ORC1_deltaSignificantBindingSites_Agnostic_AboveCutOff	0.0293414	0.0359268	0.444595	0.633848
SPT15_deltaSignificantBindingSites_Agnostic_AboveCutOff	0.0818804	0.0327646	0.020133	0.0576845
STB4_deltaSignificantBindingSites_Agnostic_AboveCutOff	NA	NA	NA	NA
SUM1_deltaSignificantBindingSites_Agnostic_AboveCutOff	0.0638021	0.0281933	0.037828	0.0824871
UME6_deltaSignificantBindingSites_Agnostic_AboveCutOff	0.260328	4.069	0.00284033	0.980515
YAP1_deltaSignificantBindingSites_Agnostic_AboveCutOff	NA	NA	NA	NA
YDR026C_deltaSignificantBindingSites_Agnostic_AboveCutOff	-0.269108	5.75607	0.44095	0.980515
BAS1_deltaSignificantBindingSites_Agnostic_AboveCutOff	-0.381221	8.86309	0.328839	0.980515
CAD1_deltaSignificantBindingSites_Agnostic_AboveCutOff	-0.133508	4.0714	0.600539	0.980515
CIN5_deltaSignificantBindingSites_Agnostic_AboveCutOff	0.0963122	0.0351698	0.0134151	0.0387602
CRZ1_deltaSignificantBindingSites_Agnostic_AboveCutOff	0.119722	0.0356159	0.00209273	0.0135779
ERT1_deltaSignificantBindingSites_Agnostic_AboveCutOff	-0.044466	0.0648228	0.460643	0.72024
GCN4_deltaSignificantBindingSites_Agnostic_AboveCutOff	0.0767234	0.0305503	0.0195037	0.0565751
GCR1_deltaSignificantBindingSites_Agnostic_AboveCutOff	-0.351001	7.34633	0.289748	0.980515
HAP1_deltaSignificantBindingSites_Agnostic_AboveCutOff	0.0588392	0.0303353	0.080597	0.137888
HAP3_deltaSignificantBindingSites_Agnostic_AboveCutOff	-0.184031	5.75738	0.644459	0.980515
LEU3_deltaSignificantBindingSites_Agnostic_AboveCutOff	NA	NA	NA	NA
MAC1_deltaSignificantBindingSites_Agnostic_AboveCutOff	0.0046311	0.0515523	0.929293	0.980515
MBP1_deltaSignificantBindingSites_Agnostic_AboveCutOff	0.0471214	0.0315515	0.168241	0.265311
MET31_deltaSignificantBindingSites_Agnostic_AboveCutOff	NA	NA	NA	NA
NRG1_deltaSignificantBindingSites_Agnostic_AboveCutOff	0.0301696	0.038473	0.461924	0.653433
PHD1_deltaSignificantBindingSites_Agnostic_AboveCutOff	0.0570156	0.0408363	0.189453	0.305314
RLM1_deltaSignificantBindingSites_Agnostic_AboveCutOff	0.0645417	0.0352522	0.0917727	0.164541
RPH1_deltaSignificantBindingSites_Agnostic_AboveCutOff	0.0343927	0.039848	0.410375	0.605085
RPN4_deltaSignificantBindingSites_Agnostic_AboveCutOff	NA	NA	NA	NA
SIP4_deltaSignificantBindingSites_Agnostic_AboveCutOff	NA	NA	NA	NA
TEC1_deltaSignificantBindingSites_Agnostic_AboveCutOff	-0.0200285	0.0639652	0.743311	0.980515
TYE7_deltaSignificantBindingSites_Agnostic_AboveCutOff	0.0566396	0.0309351	0.0963984	0.164541
YAP6_deltaSignificantBindingSites_Agnostic_AboveCutOff	0.0736335	0.0383683	0.0774944	0.142699
YAP7_deltaSignificantBindingSites_Agnostic_AboveCutOff	0.0556808	0.0351566	0.148348	0.235221
RDS2_deltaSignificantBindingSites_Agnostic_AboveCutOff	0.118632	0.040845	0.00629346	0.0286678
YGR067C_deltaSignificantBindingSites_Agnostic_AboveCutOff	0.0473921	0.0437027	0.291801	0.467413
YML081W_deltaSignificantBindingSites_Agnostic_AboveCutOff	0.0787185	0.0428141	0.0768844	0.163733
ASG1_deltaSignificantBindingSites_Agnostic_AboveCutOff	0.0138495	0.0363908	0.71647	0.936581
CEP3_deltaSignificantBindingSites_Agnostic_AboveCutOff	NA	NA	NA	NA
DOT6_deltaSignificantBindingSites_Agnostic_AboveCutOff	-0.0161363	0.055683	0.765478	0.980515
ECM22_deltaSignificantBindingSites_Agnostic_AboveCutOff	-0.454834	8.64795	0.235751	0.980515
FHL1_deltaSignificantBindingSites_Agnostic_AboveCutOff	0.0620009	0.0419211	0.160717	0.270474
GAT1_deltaSignificantBindingSites_Agnostic_AboveCutOff	0.0945298	0.0303856	0.00302183	0.0199104
GAT4_deltaSignificantBindingSites_Agnostic_AboveCutOff	-0.350381	8.19064	0.3474	0.980515
HAL9_deltaSignificantBindingSites_Agnostic_AboveCutOff	0.0621932	0.0337189	0.0903521	0.162685
LYS14_deltaSignificantBindingSites_Agnostic_AboveCutOff	NA	NA	NA	NA
MIG2_deltaSignificantBindingSites_Agnostic_AboveCutOff	0.0265092	0.0397791	0.537217	0.735483
MIG3_deltaSignificantBindingSites_Agnostic_AboveCutOff	-0.133352	4.0714	0.602649	0.980515
NDT80_deltaSignificantBindingSites_Agnostic_AboveCutOff	-0.343873	10.7668	0.645791	0.980515
NHP6A_deltaSignificantBindingSites_Agnostic_AboveCutOff	0.0179974	0.0480407	0.717512	0.941498
NHP6B_deltaSignificantBindingSites_Agnostic_AboveCutOff	0.00505403	0.0456757	0.914068	0.980515
OAF1_deltaSignificantBindingSites_Agnostic_AboveCutOff	0.035592	0.0560972	0.55556	0.761243
PHO2_deltaSignificantBindingSites_Agnostic_AboveCutOff	-0.0700217	0.0676518	0.246606	0.495869
RDR1_deltaSignificantBindingSites_Agnostic_AboveCutOff	NA	NA	NA	NA
RDS1_deltaSignificantBindingSites_Agnostic_AboveCutOff	NA	NA	NA	NA
SFL1_deltaSignificantBindingSites_Agnostic_AboveCutOff	-0.0862203	0.0776398	0.182844	0.452353
SFP1_deltaSignificantBindingSites_Agnostic_AboveCutOff	0.0850737	0.0324417	0.0161637	0.0457039
SRD1_deltaSignificantBindingSites_Agnostic_AboveCutOff	NA	NA	NA	NA
STB3_deltaSignificantBindingSites_Agnostic_AboveCutOff	-0.129878	4.0714	0.647722	0.980515
STP2_deltaSignificantBindingSites_Agnostic_AboveCutOff	0.0859813	0.0417886	0.0558911	0.114072
SUT2_deltaSignificantBindingSites_Agnostic_AboveCutOff	-0.258941	8.14088	0.652395	0.980515
TBF1_deltaSignificantBindingSites_Agnostic_AboveCutOff	0.0300803	0.0421095	0.510922	0.701053
TBS1_deltaSignificantBindingSites_Agnostic_AboveCutOff	-0.130567	4.0714	0.639118	0.980515
TEA1_deltaSignificantBindingSites_Agnostic_AboveCutOff	NA	NA	NA	NA
TOD6_deltaSignificantBindingSites_Agnostic_AboveCutOff	0.0549391	0.0381262	0.184028	0.285542
YKL222C_deltaSignificantBindingSites_Agnostic_AboveCutOff	0.0117821	0.050721	0.821622	0.980515
YLL054C_deltaSignificantBindingSites_Agnostic_AboveCutOff	NA	NA	NA	NA
YPR013C_deltaSignificantBindingSites_Agnostic_AboveCutOff	0.0314838	0.0266194	0.28751	0.407844
YPR015C_deltaSignificantBindingSites_Agnostic_AboveCutOff	NA	NA	NA	NA
YRM1_deltaSignificantBindingSites_Agnostic_AboveCutOff	NA	NA	NA	NA
metaChangeInNumberOfTFBS_Agnostic_AboveCutOff	0.293262	0.0409454	9.78118e-12	5.15038e-10
metaAverage_differenceOfMeans_Agnostic_AboveCutOff	0.299673	0.0404916	1.77127e-12	1.43379e-10
metaMax_differenceOfMeans_Agnostic_AboveCutOff	0.305258	0.0487306	3.46647e-10	1.08095e-07
metaAverage_differenceOfMax_Agnostic_AboveCutOff	0.298962	0.0405432	2.1689e-12	1.43379e-10
metaMax_differenceOfMax_Agnostic_AboveCutOff	0.305442	0.0487332	3.38516e-10	1.08095e-07
ABF2_differenceOfMax_Plus_BelowCutOff	0.186908	0.0478475	0.000110999	0.00458256
CAT8_differenceOfMax_Plus_BelowCutOff	0.0999658	0.0490204	0.0420078	0.11791
CST6_differenceOfMax_Plus_BelowCutOff	0.142422	0.0483871	0.00362442	0.0267535
ECM23_differenceOfMax_Plus_BelowCutOff	0.0211412	0.048837	0.666137	0.89493
EDS1_differenceOfMax_Plus_BelowCutOff	0.00646836	0.0497821	0.896692	0.980515
FKH2_differenceOfMax_Plus_BelowCutOff	0.0853209	0.0485281	0.0802698	0.183934
FZF1_differenceOfMax_Plus_BelowCutOff	0.0550431	0.0490882	0.263902	0.445099
GIS1_differenceOfMax_Plus_BelowCutOff	0.079259	0.0481196	0.102694	0.215715
GSM1_differenceOfMax_Plus_BelowCutOff	0.165277	0.049194	0.000790671	0.0135779
GZF3_differenceOfMax_Plus_BelowCutOff	0.0285161	0.0486809	0.559454	0.794207
HCM1_differenceOfMax_Plus_BelowCutOff	0.0878352	0.0484293	0.0711483	0.169149
HMRA2_differenceOfMax_Plus_BelowCutOff	0.091264	0.0472834	0.0564853	0.139673
NHP10_differenceOfMax_Plus_BelowCutOff	0.129691	0.0477607	0.00722059	0.0401047
PDR8_differenceOfMax_Plus_BelowCutOff	0.126273	0.0471198	0.00819087	0.0420274
REB1_differenceOfMax_Plus_BelowCutOff	0.113553	0.0482745	0.0197815	0.0723162
REI1_differenceOfMax_Plus_BelowCutOff	0.0472662	0.0485311	0.332118	0.5339
RSC30_differenceOfMax_Plus_BelowCutOff	0.120417	0.0489016	0.0140404	0.0610026
RSC3_differenceOfMax_Plus_BelowCutOff	0.15194	0.0486068	0.00174178	0.0196188
RSF2_differenceOfMax_Plus_BelowCutOff	0.140991	0.0475549	0.00339061	0.0255416
STE12_differenceOfMax_Plus_BelowCutOff	-0.0208334	0.0498888	0.67559	0.907249
STP3_differenceOfMax_Plus_BelowCutOff	0.138387	0.0484594	0.00458095	0.0317564
STP4_differenceOfMax_Plus_BelowCutOff	0.114442	0.0482904	0.0189732	0.0703111
SWI5_differenceOfMax_Plus_BelowCutOff	0.066622	0.0487535	0.173187	0.317396
TOS8_differenceOfMax_Plus_BelowCutOff	0.0486288	0.0480017	0.314902	0.511032
USV1_differenceOfMax_Plus_BelowCutOff	0.0741309	0.04852	0.128931	0.253887
YER130C_differenceOfMax_Plus_BelowCutOff	0.148645	0.0470848	0.00186155	0.0186427
YER184C_differenceOfMax_Plus_BelowCutOff	0.0932431	0.0488739	0.0575585	0.145575
YLR278C_differenceOfMax_Plus_BelowCutOff	0.0606604	0.0490634	0.218786	0.380985
YNR063W_differenceOfMax_Plus_BelowCutOff	0.131664	0.0471694	0.00598887	0.0353344
YOX1_differenceOfMax_Plus_BelowCutOff	0.172013	0.0474524	0.000341268	0.00842961
YPR022C_differenceOfMax_Plus_BelowCutOff	0.102344	0.0488494	0.0367299	0.107168
YPR196W_differenceOfMax_Plus_BelowCutOff	0.00821023	0.0498114	0.869208	0.980515
ACA1_differenceOfMax_Plus_BelowCutOff	0.137423	0.0467511	0.00376214	0.0269797
ADR1_differenceOfMax_Plus_BelowCutOff	0.0414377	0.0484044	0.39403	0.608564
AFT1_differenceOfMax_Plus_BelowCutOff	0.0980291	0.0486332	0.0457832	0.122051
DAL81_differenceOfMax_Plus_BelowCutOff	0.0924985	0.047514	0.0539174	0.135897
DAL82_differenceOfMax_Plus_BelowCutOff	0.0635519	0.0483841	0.191608	0.340997
DIG1_differenceOfMax_Plus_BelowCutOff	0.11664	0.0478075	0.0158458	0.0627301
FKH1_differenceOfMax_Plus_BelowCutOff	0.0859396	0.0485418	0.0789399	0.181586
MIG1_differenceOfMax_Plus_BelowCutOff	0.0883963	0.0478768	0.0667783	0.162174
OPI1_differenceOfMax_Plus_BelowCutOff	0.0728144	0.0482942	0.134639	0.260838
PIP2_differenceOfMax_Plus_BelowCutOff	0.153173	0.0472702	0.00137532	0.0160344
PPR1_differenceOfMax_Plus_BelowCutOff	0.0761836	0.0478076	0.114358	0.232753
RGM1_differenceOfMax_Plus_BelowCutOff	0.155601	0.0490759	0.00153301	0.0183673
RTG1_differenceOfMax_Plus_BelowCutOff	0.110005	0.0483632	0.0241127	0.0806684
SKN7_differenceOfMax_Plus_BelowCutOff	0.10664	0.0473881	0.0264754	0.0844251
UPC2_differenceOfMax_Plus_BelowCutOff	0.06581	0.0485184	0.177777	0.321639
WAR1_differenceOfMax_Plus_BelowCutOff	0.111411	0.04721	0.0195102	0.0716708
XBP1_differenceOfMax_Plus_BelowCutOff	0.0826921	0.0471662	0.0832194	0.185251
AFT2_differenceOfMax_Plus_BelowCutOff	0.0367946	0.048901	0.453775	0.675778
MATA2_differenceOfMax_Plus_BelowCutOff	0.0901639	0.0462928	0.0558343	0.135742
MSN1_differenceOfMax_Plus_BelowCutOff	0.061955	0.0475549	0.197527	0.346804
NRG2_differenceOfMax_Plus_BelowCutOff	0.155969	0.0470307	0.00110585	0.0144379
ROX1_differenceOfMax_Plus_BelowCutOff	0.00971693	0.0495944	0.844858	0.980515
DAL80_differenceOfMax_Plus_BelowCutOff	0.0523807	0.0487799	0.285179	0.473572
GLN3_differenceOfMax_Plus_BelowCutOff	0.0760129	0.047446	0.11295	0.229963
HAP4_differenceOfMax_Plus_BelowCutOff	0.0599127	0.0488181	0.221845	0.385667
MET4_differenceOfMax_Plus_BelowCutOff	0.0720165	0.0483489	0.138822	0.266944
MOT2_differenceOfMax_Plus_BelowCutOff	0.0659887	0.0488753	0.17875	0.323012
MSN2_differenceOfMax_Plus_BelowCutOff	0.0471932	0.0488105	0.33577	0.537589
MSN4_differenceOfMax_Plus_BelowCutOff	0.085533	0.0484333	0.0792716	0.182823
NDD1_differenceOfMax_Plus_BelowCutOff	0.108028	0.047402	0.0244829	0.0803921
RIM101_differenceOfMax_Plus_BelowCutOff	0.0628016	0.0489678	0.201276	0.356486
SOK2_differenceOfMax_Plus_BelowCutOff	0.133314	0.0469041	0.00528834	0.0326639
SPT23_differenceOfMax_Plus_BelowCutOff	0.0365468	0.0500036	0.466723	0.688786
SPT2_differenceOfMax_Plus_BelowCutOff	0.153465	0.0474496	0.00140644	0.0160732
STB1_differenceOfMax_Plus_BelowCutOff	0.111489	0.0463062	0.0179066	0.0652296
STB5_differenceOfMax_Plus_BelowCutOff	0.128746	0.0477928	0.00752957	0.0411139
SUT1_differenceOfMax_Plus_BelowCutOff	0.0446407	0.0480316	0.355681	0.561347
THO2_differenceOfMax_Plus_BelowCutOff	0.0639019	0.0494472	0.197707	0.351831
UME1_differenceOfMax_Plus_BelowCutOff	0.0978359	0.0478998	0.042529	0.11725
ZAP1_differenceOfMax_Plus_BelowCutOff	0.108567	0.0465093	0.0216864	0.0741762
ABF1_differenceOfMax_Plus_BelowCutOff	0.156253	0.046403	0.000951269	0.0135779
ACE2_differenceOfMax_Plus_BelowCutOff	0.152566	0.0465527	0.00127224	0.0147703
ARG81_differenceOfMax_Plus_BelowCutOff	0.126199	0.04543	0.00660529	0.0359605
ASH1_differenceOfMax_Plus_BelowCutOff	0.137464	0.0461263	0.0034182	0.0250966
AZF1_differenceOfMax_Plus_BelowCutOff	0.102283	0.0481509	0.0349892	0.102176
CBF1_differenceOfMax_Plus_BelowCutOff	0.0897878	0.0482826	0.0662505	0.15832
GAL4_differenceOfMax_Plus_BelowCutOff	0.11703	0.0475993	0.0148383	0.0610525
GAT3_differenceOfMax_Plus_BelowCutOff	0.0649523	0.0479113	0.179448	0.321639
GCR2_differenceOfMax_Plus_BelowCutOff	0.083833	0.0484771	0.0863501	0.19125
GTS1_differenceOfMax_Plus_BelowCutOff	0.0950774	0.0479887	0.049463	0.128487
HAC1_differenceOfMax_Plus_BelowCutOff	0.100415	0.0470128	0.0353309	0.100213
HAP2_differenceOfMax_Plus_BelowCutOff	0.164033	0.047645	0.000639874	0.0116249
IME1_differenceOfMax_Plus_BelowCutOff	0.0927623	0.0481679	0.0556932	0.140939
IXR1_differenceOfMax_Plus_BelowCutOff	0.075829	0.049143	0.123139	0.248326
JHD1_differenceOfMax_Plus_BelowCutOff	0.0941191	0.0486455	0.0539104	0.139018
MATA1_differenceOfMax_Plus_BelowCutOff	0.145066	0.04565	0.00186029	0.0182588
MET32_differenceOfMax_Plus_BelowCutOff	0.0291768	0.0490855	0.553301	0.789435
MOT3_differenceOfMax_Plus_BelowCutOff	0.0950636	0.0481574	0.0505921	0.130148
PDR1_differenceOfMax_Plus_BelowCutOff	0.120245	0.0473734	0.0125081	0.0535604
RFX1_differenceOfMax_Plus_BelowCutOff	0.0932373	0.0484305	0.0553212	0.141004
RGT1_differenceOfMax_Plus_BelowCutOff	0.0095612	0.0485025	0.844007	0.980515
RME1_differenceOfMax_Plus_BelowCutOff	0.0927796	0.0473446	0.0527308	0.133225
RTG3_differenceOfMax_Plus_BelowCutOff	0.0961736	0.0473202	0.0449498	0.119221
SKO1_differenceOfMax_Plus_BelowCutOff	0.101454	0.0488392	0.0385586	0.110927
SNF1_differenceOfMax_Plus_BelowCutOff	0.125968	0.0466307	0.0078637	0.0405846
SNT2_differenceOfMax_Plus_BelowCutOff	0.0398574	0.0487637	0.4161	0.633645
STB2_differenceOfMax_Plus_BelowCutOff	0.13516	0.0483881	0.00567492	0.0353344
STP1_differenceOfMax_Plus_BelowCutOff	0.00383645	0.0495769	0.938346	0.980515
SWI4_differenceOfMax_Plus_BelowCutOff	0.123668	0.047255	0.0100101	0.0463308
SWI6_differenceOfMax_Plus_BelowCutOff	0.081601	0.048367	0.0944828	0.203372
THI2_differenceOfMax_Plus_BelowCutOff	0.00372909	0.0492564	0.939683	0.980515
URC2_differenceOfMax_Plus_BelowCutOff	0.108799	0.0475906	0.0238621	0.0792165
YHP1_differenceOfMax_Plus_BelowCutOff	0.103282	0.0481061	0.0328344	0.0987395
YRR1_differenceOfMax_Plus_BelowCutOff	0.166579	0.0468733	0.000462949	0.00966349
ARG80_differenceOfMax_Plus_BelowCutOff	0.146985	0.0455603	0.00159152	0.0162032
ARO80_differenceOfMax_Plus_BelowCutOff	0.0887271	0.048145	0.0681257	0.162789
ARR1_differenceOfMax_Plus_BelowCutOff	0.0671526	0.0467788	0.155288	0.287856
CHA4_differenceOfMax_Plus_BelowCutOff	0.0655243	0.0474423	0.172089	0.310759
CUP9_differenceOfMax_Plus_BelowCutOff	0.109472	0.0472887	0.0227172	0.0754805
HMS1_differenceOfMax_Plus_BelowCutOff	0.131985	0.0478299	0.00640741	0.0373878
INO2_differenceOfMax_Plus_BelowCutOff	0.12529	0.0472649	0.00886225	0.0442603
MCM1_differenceOfMax_Plus_BelowCutOff	0.0512607	0.0478659	0.288067	0.475383
MET28_differenceOfMax_Plus_BelowCutOff	0.111137	0.0472811	0.0204655	0.0723162
MGA1_differenceOfMax_Plus_BelowCutOff	0.201007	0.0468232	2.49969e-05	0.00134655
PDR3_differenceOfMax_Plus_BelowCutOff	0.168285	0.0483728	0.000571113	0.0111912
PHO4_differenceOfMax_Plus_BelowCutOff	0.151891	0.0479514	0.00166001	0.0184724
PUT3_differenceOfMax_Plus_BelowCutOff	0.0364655	0.0485019	0.454024	0.675778
RAP1_differenceOfMax_Plus_BelowCutOff	0.158658	0.0458272	0.000694887	0.0113405
SMP1_differenceOfMax_Plus_BelowCutOff	0.0964256	0.0474983	0.0453355	0.119495
UGA3_differenceOfMax_Plus_BelowCutOff	0.109418	0.0471282	0.0215428	0.0754805
YAP3_differenceOfMax_Plus_BelowCutOff	0.0795769	0.0461345	0.0891965	0.192869
YAP5_differenceOfMax_Plus_BelowCutOff	0.0711508	0.0482636	0.142537	0.272249
CUP2_differenceOfMax_Plus_BelowCutOff	0.0918211	0.0481135	0.0578453	0.145521
GAL80_differenceOfMax_Plus_BelowCutOff	0.128885	0.048509	0.00826063	0.0437408
HAP5_differenceOfMax_Plus_BelowCutOff	0.108762	0.0455961	0.019333	0.0679418
HSF1_differenceOfMax_Plus_BelowCutOff	0.0787694	0.0482409	0.106525	0.221198
INO4_differenceOfMax_Plus_BelowCutOff	0.0903645	0.0476575	0.0607296	0.148492
MATALPHA2_differenceOfMax_Plus_BelowCutOff	0.119047	0.0488081	0.0153923	0.0627301
ORC1_differenceOfMax_Plus_BelowCutOff	0.118432	0.0472352	0.0129961	0.0569087
SPT15_differenceOfMax_Plus_BelowCutOff	0.0711953	0.0486754	0.145989	0.276679
STB4_differenceOfMax_Plus_BelowCutOff	0.136107	0.0469577	0.00425943	0.0289704
SUM1_differenceOfMax_Plus_BelowCutOff	0.0872965	0.0479797	0.0714394	0.167652
UME6_differenceOfMax_Plus_BelowCutOff	0.141951	0.0457921	0.00234739	0.0202112
YAP1_differenceOfMax_Plus_BelowCutOff	0.0988613	0.0479509	0.0407355	0.113421
YDR026C_differenceOfMax_Plus_BelowCutOff	0.0929763	0.0479252	0.0543642	0.137888
BAS1_differenceOfMax_Plus_BelowCutOff	0.0754412	0.0477968	0.118499	0.23624
CAD1_differenceOfMax_Plus_BelowCutOff	0.106009	0.0485442	0.0300911	0.0930974
CIN5_differenceOfMax_Plus_BelowCutOff	0.197583	0.0446188	1.62542e-05	0.000898585
CRZ1_differenceOfMax_Plus_BelowCutOff	0.105172	0.0484216	0.030817	0.0953324
ERT1_differenceOfMax_Plus_BelowCutOff	0.0738159	0.0487647	0.132649	0.259032
GCN4_differenceOfMax_Plus_BelowCutOff	0.075629	0.0476989	0.115835	0.235221
GCR1_differenceOfMax_Plus_BelowCutOff	0.0395996	0.048713	0.418156	0.636411
HAP1_differenceOfMax_Plus_BelowCutOff	0.147741	0.0473441	0.00212596	0.0197711
HAP3_differenceOfMax_Plus_BelowCutOff	0.090015	0.0473546	0.0603494	0.147472
LEU3_differenceOfMax_Plus_BelowCutOff	0.100177	0.0485209	0.039903	0.113257
MAC1_differenceOfMax_Plus_BelowCutOff	0.0347543	0.0485175	0.476205	0.700433
MBP1_differenceOfMax_Plus_BelowCutOff	0.150421	0.0475672	0.00179826	0.0185709
MET31_differenceOfMax_Plus_BelowCutOff	0.0956718	0.0476721	0.0462669	0.123887
NRG1_differenceOfMax_Plus_BelowCutOff	0.105512	0.0476069	0.0283003	0.0892186
PHD1_differenceOfMax_Plus_BelowCutOff	0.120662	0.0467267	0.0109542	0.0496157
RLM1_differenceOfMax_Plus_BelowCutOff	0.198589	0.0482858	4.52504e-05	0.00247516
RPH1_differenceOfMax_Plus_BelowCutOff	0.12473	0.0474642	0.00953895	0.045152
RPN4_differenceOfMax_Plus_BelowCutOff	0.0536666	0.0487103	0.272782	0.45759
SIP4_differenceOfMax_Plus_BelowCutOff	0.104054	0.0479525	0.0316922	0.0955951
TEC1_differenceOfMax_Plus_BelowCutOff	0.0572281	0.0481567	0.238259	0.405623
TYE7_differenceOfMax_Plus_BelowCutOff	0.181215	0.0466792	0.000137796	0.00471737
YAP6_differenceOfMax_Plus_BelowCutOff	0.22956	0.0445309	5.83896e-07	2.86173e-05
YAP7_differenceOfMax_Plus_BelowCutOff	0.103211	0.0491736	0.0366034	0.106652
RDS2_differenceOfMax_Plus_BelowCutOff	0.106807	0.0482269	0.0285134	0.089365
YGR067C_differenceOfMax_Plus_BelowCutOff	0.0828538	0.0490241	0.0928638	0.202419
YML081W_differenceOfMax_Plus_BelowCutOff	0.131769	0.0470109	0.00566594	0.0345946
ASG1_differenceOfMax_Plus_BelowCutOff	0.165532	0.0473295	0.00055472	0.0111912
CEP3_differenceOfMax_Plus_BelowCutOff	0.139992	0.0458495	0.00289118	0.0211357
DOT6_differenceOfMax_Plus_BelowCutOff	0.0543039	0.0486371	0.266761	0.448283
ECM22_differenceOfMax_Plus_BelowCutOff	0.129633	0.0479179	0.00745257	0.0405378
FHL1_differenceOfMax_Plus_BelowCutOff	0.106547	0.0468903	0.0248365	0.0808265
GAT1_differenceOfMax_Plus_BelowCutOff	0.142144	0.0474162	0.00300885	0.0237697
GAT4_differenceOfMax_Plus_BelowCutOff	0.0641942	0.0481074	0.186347	0.330767
HAL9_differenceOfMax_Plus_BelowCutOff	0.0805359	0.0477844	0.096119	0.203673
LYS14_differenceOfMax_Plus_BelowCutOff	0.128007	0.0480101	0.00824495	0.0430984
MIG2_differenceOfMax_Plus_BelowCutOff	0.0973385	0.0471975	0.0418766	0.113421
MIG3_differenceOfMax_Plus_BelowCutOff	0.0984818	0.0474075	0.0402415	0.110927
NDT80_differenceOfMax_Plus_BelowCutOff	0.0937296	0.048546	0.0553877	0.139673
NHP6A_differenceOfMax_Plus_BelowCutOff	0.158662	0.0477142	0.00101278	0.0142436
NHP6B_differenceOfMax_Plus_BelowCutOff	0.178753	0.0472103	0.000202031	0.00601392
OAF1_differenceOfMax_Plus_BelowCutOff	0.138285	0.047241	0.00397496	0.0275901
PHO2_differenceOfMax_Plus_BelowCutOff	0.108643	0.0476923	0.0245112	0.0804377
RDR1_differenceOfMax_Plus_BelowCutOff	0.111873	0.0481012	0.0209863	0.0752486
RDS1_differenceOfMax_Plus_BelowCutOff	0.142645	0.0481411	0.00315189	0.0255416
SFL1_differenceOfMax_Plus_BelowCutOff	0.0431962	0.0473341	0.367171	0.573568
SFP1_differenceOfMax_Plus_BelowCutOff	0.0790677	0.0481616	0.103951	0.217918
SRD1_differenceOfMax_Plus_BelowCutOff	0.134409	0.0482296	0.00571595	0.0355187
STB3_differenceOfMax_Plus_BelowCutOff	0.104694	0.0445792	0.0219907	0.0724914
STP2_differenceOfMax_Plus_BelowCutOff	0.125187	0.0475365	0.00914753	0.0450078
SUT2_differenceOfMax_Plus_BelowCutOff	0.146199	0.0477491	0.00246615	0.0209616
TBF1_differenceOfMax_Plus_BelowCutOff	0.1811	0.0470669	0.000150346	0.0049771
TBS1_differenceOfMax_Plus_BelowCutOff	0.129629	0.0482169	0.00764508	0.0414114
[truncated: 999 more rows]

## Sheet: linearRegressions
FEATURE	Estimate_FeatureAndAveExprAndLibrary	StdError_FeatureAndAveExprAndLibrary	ANOVA_FeatureAndAveExprAndLibraryVsAveExprAndLibrary	adj.P.val_FeatureAndAveExprAndLibrary
SNP	0.0110213	0.00757496	0.14568	0.278111
SignificantGeneIsDesignedGene	0.033359	0.048125	0.4882	0.483393
essential	-0.0145344	0.00756834	0.054804	0.15464
isTF	0.00696283	0.0161459	0.666291	0.533502
hasHumanHomolog	0.000298018	0.00584167	0.959313	0.616671
hasParalog	0.000391173	0.00728887	0.9572	0.615557
inANucleosome	-0.0183068	0.00600718	0.00230764	0.0184351
numberVarsInOligo	0.00115702	0.00342398	0.735427	0.554923
varPosInOligo	-0.00520758	0.00286146	0.0687735	0.178005
numberOfGenes	-0.00189364	0.00267507	0.479018	0.478567
delta_BP	0.0125138	0.00259634	1.4371e-06	3.17815e-05
delta_A	0.0106869	0.00267585	6.5015e-05	0.001063
delta_T	0.011182	0.00265027	2.45176e-05	0.000437047
delta_G	0.0128644	0.00269847	1.86714e-06	3.91716e-05
delta_C	0.00863453	0.00266411	0.00119087	0.0115993
delta_TATA	0.0048068	0.00284407	0.0910065	0.208595
delta_ATG	-0.000428842	0.0028222	0.879224	0.595483
GCContentOfOligo	-0.00123384	0.00293592	0.674297	0.538322
GCFoldChange	-7.7942e-05	0.00281397	0.977903	0.621973
expression	-0.00650748	0.0031474	0.0386799	0.124834
dNdS	0.00230791	0.00418613	0.581413	0.51393
dNdS_adjust	0.00250485	0.00419575	0.550509	0.503954
PPI	-0.00330729	0.00287754	0.250413	0.369084
GxGLenient	-0.00383968	0.00309331	0.214501	0.342269
GxGIntermediate	-0.00406798	0.00309529	0.188762	0.322779
GxGStrict	-0.00377939	0.00309086	0.221418	0.344173
distFromGene	0.00117727	0.00316825	0.710202	0.548746
nucleosomeScore	0.00127288	0.00359677	0.723418	0.552013
phastConScore	0.0108163	0.0028634	0.000158442	0.00232897
MAF	-0.00735809	0.00286907	0.0103289	0.0553553
DAF	-0.00982351	0.00308845	0.0014691	0.0134377
ABF2_differenceOfMax_Plus_AboveCutOff	0.000777045	0.00335171	0.816666	0.57776
CAT8_differenceOfMax_Plus_AboveCutOff	0.000992949	0.00314718	0.752379	0.560422
CST6_differenceOfMax_Plus_AboveCutOff	0.00870034	0.00310824	0.00512421	0.0332117
ECM23_differenceOfMax_Plus_AboveCutOff	-0.00150035	0.0029012	0.605053	0.516517
EDS1_differenceOfMax_Plus_AboveCutOff	NA	NA	NA	NA
FKH2_differenceOfMax_Plus_AboveCutOff	-0.00146253	0.00275854	0.595986	0.514248
FZF1_differenceOfMax_Plus_AboveCutOff	0.000907894	0.00279854	0.745622	0.557949
GIS1_differenceOfMax_Plus_AboveCutOff	0.00397228	0.00257878	0.12347	0.254257
GSM1_differenceOfMax_Plus_AboveCutOff	0.00947245	0.00311949	0.00239312	0.0185288
GZF3_differenceOfMax_Plus_AboveCutOff	0.00324194	0.002853	0.255819	0.372666
HCM1_differenceOfMax_Plus_AboveCutOff	-0.00352127	0.00303147	0.24541	0.364348
HMRA2_differenceOfMax_Plus_AboveCutOff	0.00132367	0.00292009	0.650334	0.526226
NHP10_differenceOfMax_Plus_AboveCutOff	-0.002094	0.00341014	0.539181	0.50286
PDR8_differenceOfMax_Plus_AboveCutOff	-0.002509	0.00268125	0.349397	0.42063
REB1_differenceOfMax_Plus_AboveCutOff	-0.0155327	0.0239167	0.516047	0.493609
REI1_differenceOfMax_Plus_AboveCutOff	0.00268586	0.00284913	0.345837	0.417778
RSC30_differenceOfMax_Plus_AboveCutOff	0.00278013	0.00329513	0.398832	0.446252
RSC3_differenceOfMax_Plus_AboveCutOff	0.00861272	0.00280648	0.00214873	0.0177332
RSF2_differenceOfMax_Plus_AboveCutOff	0.00978297	0.00257439	0.000144626	0.00220503
STE12_differenceOfMax_Plus_AboveCutOff	-0.000930731	0.00293744	0.751357	0.560174
STP3_differenceOfMax_Plus_AboveCutOff	0.000324235	0.00280776	0.908066	0.604628
STP4_differenceOfMax_Plus_AboveCutOff	-0.000737791	0.00281229	0.793055	0.572371
SWI5_differenceOfMax_Plus_AboveCutOff	0.00107244	0.00281307	0.703029	0.548746
TOS8_differenceOfMax_Plus_AboveCutOff	0.00439363	0.00284233	0.122156	0.252836
USV1_differenceOfMax_Plus_AboveCutOff	0.00371825	0.00288709	0.197785	0.331631
YER130C_differenceOfMax_Plus_AboveCutOff	0.00352301	0.00269169	0.190586	0.322915
YER184C_differenceOfMax_Plus_AboveCutOff	0.00523348	0.00307966	0.0892493	0.206316
YLR278C_differenceOfMax_Plus_AboveCutOff	-0.00404881	0.00309397	0.190666	0.322915
YNR063W_differenceOfMax_Plus_AboveCutOff	-0.00298062	0.00294223	0.311037	0.403415
YOX1_differenceOfMax_Plus_AboveCutOff	4.28239e-05	0.002906	0.988243	0.623639
YPR022C_differenceOfMax_Plus_AboveCutOff	-0.000411652	0.00266174	0.877093	0.595407
YPR196W_differenceOfMax_Plus_AboveCutOff	0.00232034	0.00276832	0.401932	0.44749
ACA1_differenceOfMax_Plus_AboveCutOff	NA	NA	NA	NA
ADR1_differenceOfMax_Plus_AboveCutOff	NA	NA	NA	NA
AFT1_differenceOfMax_Plus_AboveCutOff	-0.000643089	0.00329612	0.845311	0.583801
DAL81_differenceOfMax_Plus_AboveCutOff	NA	NA	NA	NA
DAL82_differenceOfMax_Plus_AboveCutOff	-0.00142326	0.00285704	0.618372	0.52001
DIG1_differenceOfMax_Plus_AboveCutOff	NA	NA	NA	NA
FKH1_differenceOfMax_Plus_AboveCutOff	-0.00304804	0.00296081	0.303263	0.40161
MIG1_differenceOfMax_Plus_AboveCutOff	-0.000868168	0.00233082	0.709541	0.548746
OPI1_differenceOfMax_Plus_AboveCutOff	-0.00184601	0.00286131	0.518822	0.494139
PIP2_differenceOfMax_Plus_AboveCutOff	NA	NA	NA	NA
PPR1_differenceOfMax_Plus_AboveCutOff	1.26216e-05	0.00233207	0.995682	0.624401
RGM1_differenceOfMax_Plus_AboveCutOff	NA	NA	NA	NA
RTG1_differenceOfMax_Plus_AboveCutOff	NA	NA	NA	NA
SKN7_differenceOfMax_Plus_AboveCutOff	-0.0021467	0.00415413	0.605322	0.516517
UPC2_differenceOfMax_Plus_AboveCutOff	-0.000469321	0.0023309	0.840427	0.583446
WAR1_differenceOfMax_Plus_AboveCutOff	NA	NA	NA	NA
XBP1_differenceOfMax_Plus_AboveCutOff	0.000226429	0.00257775	0.930004	0.607924
AFT2_differenceOfMax_Plus_AboveCutOff	0.0116563	0.00291395	6.32969e-05	0.00104537
MATA2_differenceOfMax_Plus_AboveCutOff	0.00424177	0.00299516	0.156714	0.289497
MSN1_differenceOfMax_Plus_AboveCutOff	0.000569194	0.00255286	0.823564	0.579922
NRG2_differenceOfMax_Plus_AboveCutOff	0.00158268	0.00314038	0.614278	0.52001
ROX1_differenceOfMax_Plus_AboveCutOff	0.00196456	0.00296592	0.507729	0.491943
DAL80_differenceOfMax_Plus_AboveCutOff	-0.00111338	0.00296345	0.707137	0.548746
GLN3_differenceOfMax_Plus_AboveCutOff	0.000486774	0.00254076	0.848066	0.583801
HAP4_differenceOfMax_Plus_AboveCutOff	-0.00105015	0.00233103	0.652344	0.526226
MET4_differenceOfMax_Plus_AboveCutOff	NA	NA	NA	NA
MOT2_differenceOfMax_Plus_AboveCutOff	-0.000822558	0.00291239	0.77761	0.5675
MSN2_differenceOfMax_Plus_AboveCutOff	0.00056632	0.00294364	0.847438	0.583801
MSN4_differenceOfMax_Plus_AboveCutOff	0.00411401	0.00409119	0.314619	0.403415
NDD1_differenceOfMax_Plus_AboveCutOff	0.00753552	0.00253777	0.00298436	0.0220504
RIM101_differenceOfMax_Plus_AboveCutOff	-0.0012659	0.00233134	0.587134	0.514248
SOK2_differenceOfMax_Plus_AboveCutOff	0.006204	0.00261957	0.0178687	0.0784024
SPT23_differenceOfMax_Plus_AboveCutOff	0.00517988	0.00309697	0.0944133	0.213245
SPT2_differenceOfMax_Plus_AboveCutOff	0.00890688	0.00406865	0.0285861	0.105831
STB1_differenceOfMax_Plus_AboveCutOff	0.00140495	0.00233245	0.546941	0.503954
STB5_differenceOfMax_Plus_AboveCutOff	0.00581029	0.00269986	0.0313918	0.111217
SUT1_differenceOfMax_Plus_AboveCutOff	0.00371798	0.00295055	0.207635	0.339985
THO2_differenceOfMax_Plus_AboveCutOff	-0.00257513	0.00271597	0.343055	0.417778
UME1_differenceOfMax_Plus_AboveCutOff	-0.00155288	0.00330028	0.637976	0.526226
ZAP1_differenceOfMax_Plus_AboveCutOff	NA	NA	NA	NA
ABF1_differenceOfMax_Plus_AboveCutOff	0.00669805	0.00328444	0.0414171	0.129028
ACE2_differenceOfMax_Plus_AboveCutOff	0.00758813	0.00295302	0.0101812	0.0547429
ARG81_differenceOfMax_Plus_AboveCutOff	0.00227109	0.00272361	0.404363	0.449467
ASH1_differenceOfMax_Plus_AboveCutOff	-0.000528723	0.00286036	0.85335	0.585656
AZF1_differenceOfMax_Plus_AboveCutOff	NA	NA	NA	NA
CBF1_differenceOfMax_Plus_AboveCutOff	0.00288533	0.00234372	0.218288	0.342572
GAL4_differenceOfMax_Plus_AboveCutOff	NA	NA	NA	NA
GAT3_differenceOfMax_Plus_AboveCutOff	-0.000750324	0.00293814	0.798434	0.573258
GCR2_differenceOfMax_Plus_AboveCutOff	-0.00478402	0.00296229	0.106317	0.230035
GTS1_differenceOfMax_Plus_AboveCutOff	-0.000610345	0.00233107	0.793452	0.572371
HAC1_differenceOfMax_Plus_AboveCutOff	NA	NA	NA	NA
HAP2_differenceOfMax_Plus_AboveCutOff	0.0158018	0.00236001	2.14714e-11	8.76356e-10
IME1_differenceOfMax_Plus_AboveCutOff	0.00036501	0.00233126	0.875582	0.594879
IXR1_differenceOfMax_Plus_AboveCutOff	NA	NA	NA	NA
JHD1_differenceOfMax_Plus_AboveCutOff	0.000740888	0.00264971	0.779776	0.568059
MATA1_differenceOfMax_Plus_AboveCutOff	0.00785484	0.00232822	0.000741511	0.00799261
MET32_differenceOfMax_Plus_AboveCutOff	NA	NA	NA	NA
MOT3_differenceOfMax_Plus_AboveCutOff	0.01489	0.00291536	3.26588e-07	7.79796e-06
PDR1_differenceOfMax_Plus_AboveCutOff	-0.0010501	0.00233081	0.652327	0.526226
RFX1_differenceOfMax_Plus_AboveCutOff	0.00744499	0.00232854	0.00138734	0.0128939
RGT1_differenceOfMax_Plus_AboveCutOff	NA	NA	NA	NA
RME1_differenceOfMax_Plus_AboveCutOff	0.00667287	0.0027701	0.0160011	0.0731774
RTG3_differenceOfMax_Plus_AboveCutOff	-0.00113677	0.0027868	0.683339	0.540751
SKO1_differenceOfMax_Plus_AboveCutOff	NA	NA	NA	NA
SNF1_differenceOfMax_Plus_AboveCutOff	NA	NA	NA	NA
SNT2_differenceOfMax_Plus_AboveCutOff	NA	NA	NA	NA
STB2_differenceOfMax_Plus_AboveCutOff	0.00437239	0.00340915	0.199651	0.332959
STP1_differenceOfMax_Plus_AboveCutOff	-0.00116523	0.00288369	0.686157	0.541218
SWI4_differenceOfMax_Plus_AboveCutOff	0.00471938	0.00269081	0.0794499	0.192869
SWI6_differenceOfMax_Plus_AboveCutOff	0.00703534	0.00267542	0.00854811	0.0473825
THI2_differenceOfMax_Plus_AboveCutOff	0.00264874	0.00233132	0.255891	0.372666
URC2_differenceOfMax_Plus_AboveCutOff	NA	NA	NA	NA
YHP1_differenceOfMax_Plus_AboveCutOff	-0.00336344	0.0027084	0.214291	0.342253
YRR1_differenceOfMax_Plus_AboveCutOff	NA	NA	NA	NA
ARG80_differenceOfMax_Plus_AboveCutOff	-0.00315635	0.00302062	0.296053	0.39836
ARO80_differenceOfMax_Plus_AboveCutOff	NA	NA	NA	NA
ARR1_differenceOfMax_Plus_AboveCutOff	-0.00290837	0.00233166	0.212274	0.341371
CHA4_differenceOfMax_Plus_AboveCutOff	-0.00157712	0.00331774	0.634531	0.526226
CUP9_differenceOfMax_Plus_AboveCutOff	NA	NA	NA	NA
HMS1_differenceOfMax_Plus_AboveCutOff	0.00542424	0.00279849	0.05259	0.151064
INO2_differenceOfMax_Plus_AboveCutOff	0.00267344	0.0026487	0.312811	0.403415
MCM1_differenceOfMax_Plus_AboveCutOff	-0.0022207	0.00233377	0.341326	0.417778
MET28_differenceOfMax_Plus_AboveCutOff	0.000367864	0.00294224	0.900501	0.603584
MGA1_differenceOfMax_Plus_AboveCutOff	-0.000729067	0.00285949	0.798751	0.573258
PDR3_differenceOfMax_Plus_AboveCutOff	0.00212068	0.00323749	0.512442	0.493564
PHO4_differenceOfMax_Plus_AboveCutOff	NA	NA	NA	NA
PUT3_differenceOfMax_Plus_AboveCutOff	NA	NA	NA	NA
RAP1_differenceOfMax_Plus_AboveCutOff	-0.00178065	0.00278984	0.523303	0.495319
SMP1_differenceOfMax_Plus_AboveCutOff	0.0134535	0.00251162	8.48532e-08	2.41842e-06
UGA3_differenceOfMax_Plus_AboveCutOff	-0.00237777	0.0023309	0.307678	0.403415
YAP3_differenceOfMax_Plus_AboveCutOff	0.00193963	0.00272147	0.476021	0.478543
YAP5_differenceOfMax_Plus_AboveCutOff	-0.000253517	0.00233097	0.913393	0.604628
CUP2_differenceOfMax_Plus_AboveCutOff	NA	NA	NA	NA
GAL80_differenceOfMax_Plus_AboveCutOff	NA	NA	NA	NA
HAP5_differenceOfMax_Plus_AboveCutOff	-0.00185226	0.00346575	0.593032	0.514248
HSF1_differenceOfMax_Plus_AboveCutOff	0.000541851	0.00233093	0.81618	0.57776
INO4_differenceOfMax_Plus_AboveCutOff	-0.00163106	0.00406999	0.688603	0.542011
MATALPHA2_differenceOfMax_Plus_AboveCutOff	-0.000266556	0.0033315	0.936229	0.608579
ORC1_differenceOfMax_Plus_AboveCutOff	0.00899929	0.0026326	0.0006299	0.00712054
SPT15_differenceOfMax_Plus_AboveCutOff	0.00764696	0.00275037	0.00543021	0.0344609
STB4_differenceOfMax_Plus_AboveCutOff	NA	NA	NA	NA
SUM1_differenceOfMax_Plus_AboveCutOff	0.00339173	0.00233053	0.145573	0.278111
UME6_differenceOfMax_Plus_AboveCutOff	0.0280947	0.00229048	1.38158e-34	1.40613e-31
YAP1_differenceOfMax_Plus_AboveCutOff	NA	NA	NA	NA
YDR026C_differenceOfMax_Plus_AboveCutOff	-0.00161491	0.00310338	0.602805	0.516517
BAS1_differenceOfMax_Plus_AboveCutOff	-0.00118386	0.00415299	0.775597	0.567049
CAD1_differenceOfMax_Plus_AboveCutOff	NA	NA	NA	NA
CIN5_differenceOfMax_Plus_AboveCutOff	0.00862892	0.00264809	0.00111984	0.0109745
CRZ1_differenceOfMax_Plus_AboveCutOff	0.0091363	0.00296256	0.00204293	0.0173889
ERT1_differenceOfMax_Plus_AboveCutOff	-0.00142923	0.00277054	0.605947	0.516517
GCN4_differenceOfMax_Plus_AboveCutOff	0.00526119	0.00247296	0.0333795	0.114116
GCR1_differenceOfMax_Plus_AboveCutOff	-0.000698663	0.003217	0.828069	0.580827
HAP1_differenceOfMax_Plus_AboveCutOff	0.00265677	0.00262764	0.311976	0.403415
HAP3_differenceOfMax_Plus_AboveCutOff	-0.000326973	0.00312641	0.916706	0.604672
LEU3_differenceOfMax_Plus_AboveCutOff	NA	NA	NA	NA
MAC1_differenceOfMax_Plus_AboveCutOff	0.00514468	0.0026596	0.053066	0.151185
MBP1_differenceOfMax_Plus_AboveCutOff	0.00286821	0.00270216	0.288485	0.395387
MET31_differenceOfMax_Plus_AboveCutOff	NA	NA	NA	NA
NRG1_differenceOfMax_Plus_AboveCutOff	0.00466908	0.00317491	0.141394	0.272495
PHD1_differenceOfMax_Plus_AboveCutOff	0.00140501	0.00294548	0.633358	0.526226
RLM1_differenceOfMax_Plus_AboveCutOff	0.0238367	0.0030296	3.60576e-15	3.07524e-13
RPH1_differenceOfMax_Plus_AboveCutOff	-0.000108726	0.00269064	0.967767	0.619653
RPN4_differenceOfMax_Plus_AboveCutOff	NA	NA	NA	NA
SIP4_differenceOfMax_Plus_AboveCutOff	NA	NA	NA	NA
TEC1_differenceOfMax_Plus_AboveCutOff	0.00246888	0.00308301	0.423245	0.460137
TYE7_differenceOfMax_Plus_AboveCutOff	0.00606445	0.00301351	0.0441756	0.134844
YAP6_differenceOfMax_Plus_AboveCutOff	0.00274216	0.0028839	0.341679	0.417778
YAP7_differenceOfMax_Plus_AboveCutOff	0.000858331	0.00252089	0.733489	0.55475
RDS2_differenceOfMax_Plus_AboveCutOff	0.00674073	0.00290646	0.020383	0.0868439
YGR067C_differenceOfMax_Plus_AboveCutOff	-0.000442186	0.00295059	0.880872	0.595483
YML081W_differenceOfMax_Plus_AboveCutOff	0.0058888	0.00266047	0.0268672	0.102612
ASG1_differenceOfMax_Plus_AboveCutOff	-0.00170818	0.00278937	0.54028	0.502887
CEP3_differenceOfMax_Plus_AboveCutOff	NA	NA	NA	NA
DOT6_differenceOfMax_Plus_AboveCutOff	-0.000589747	0.00289912	0.838805	0.583446
ECM22_differenceOfMax_Plus_AboveCutOff	-0.0020377	0.00309895	0.51083	0.492888
FHL1_differenceOfMax_Plus_AboveCutOff	0.00182631	0.00290802	0.529987	0.499444
GAT1_differenceOfMax_Plus_AboveCutOff	0.00551661	0.00275996	0.0456297	0.136641
GAT4_differenceOfMax_Plus_AboveCutOff	-0.000257181	0.00233151	0.912166	0.604628
HAL9_differenceOfMax_Plus_AboveCutOff	0.0204138	0.00291286	2.41463e-12	1.22776e-10
LYS14_differenceOfMax_Plus_AboveCutOff	NA	NA	NA	NA
MIG2_differenceOfMax_Plus_AboveCutOff	-0.00237079	0.00268229	0.376766	0.435182
MIG3_differenceOfMax_Plus_AboveCutOff	NA	NA	NA	NA
NDT80_differenceOfMax_Plus_AboveCutOff	-0.000467654	0.00428025	0.912997	0.604628
NHP6A_differenceOfMax_Plus_AboveCutOff	0.00160762	0.00282126	0.568798	0.510586
NHP6B_differenceOfMax_Plus_AboveCutOff	-0.00197794	0.00359011	0.581673	0.51393
OAF1_differenceOfMax_Plus_AboveCutOff	-0.00187076	0.00336554	0.578308	0.51384
PHO2_differenceOfMax_Plus_AboveCutOff	-0.000764206	0.00260963	0.769644	0.564839
RDR1_differenceOfMax_Plus_AboveCutOff	NA	NA	NA	NA
RDS1_differenceOfMax_Plus_AboveCutOff	NA	NA	NA	NA
SFL1_differenceOfMax_Plus_AboveCutOff	-0.00190138	0.00291159	0.513732	0.493609
SFP1_differenceOfMax_Plus_AboveCutOff	0.00912678	0.00295816	0.00203352	0.0173889
SRD1_differenceOfMax_Plus_AboveCutOff	NA	NA	NA	NA
STB3_differenceOfMax_Plus_AboveCutOff	NA	NA	NA	NA
STP2_differenceOfMax_Plus_AboveCutOff	0.00604291	0.00375051	0.107131	0.230745
SUT2_differenceOfMax_Plus_AboveCutOff	NA	NA	NA	NA
TBF1_differenceOfMax_Plus_AboveCutOff	0.000840486	0.00255426	0.742116	0.557949
TBS1_differenceOfMax_Plus_AboveCutOff	-0.00125395	0.00233136	0.590672	0.514248
TEA1_differenceOfMax_Plus_AboveCutOff	NA	NA	NA	NA
TOD6_differenceOfMax_Plus_AboveCutOff	0.00727316	0.00258349	0.00487408	0.0323213
YKL222C_differenceOfMax_Plus_AboveCutOff	-0.00237711	0.00281407	0.398265	0.446252
YLL054C_differenceOfMax_Plus_AboveCutOff	NA	NA	NA	NA
YPR013C_differenceOfMax_Plus_AboveCutOff	0.00213031	0.00233095	0.360758	0.423229
YPR015C_differenceOfMax_Plus_AboveCutOff	NA	NA	NA	NA
YRM1_differenceOfMax_Plus_AboveCutOff	NA	NA	NA	NA
ABF2_differenceOfMeans_Plus_AboveCutOff	0.000777045	0.00335171	0.816666	0.57776
CAT8_differenceOfMeans_Plus_AboveCutOff	0.000992949	0.00314718	0.752379	0.560422
CST6_differenceOfMeans_Plus_AboveCutOff	0.00870034	0.00310824	0.00512421	0.0332117
ECM23_differenceOfMeans_Plus_AboveCutOff	-0.00150035	0.0029012	0.605053	0.516517
EDS1_differenceOfMeans_Plus_AboveCutOff	NA	NA	NA	NA
FKH2_differenceOfMeans_Plus_AboveCutOff	-0.00146253	0.00275854	0.595986	0.514248
FZF1_differenceOfMeans_Plus_AboveCutOff	0.000907894	0.00279854	0.745622	0.557949
GIS1_differenceOfMeans_Plus_AboveCutOff	0.00397228	0.00257878	0.12347	0.254257
GSM1_differenceOfMeans_Plus_AboveCutOff	0.00995858	0.0031172	0.00139966	0.0129346
GZF3_differenceOfMeans_Plus_AboveCutOff	0.00324194	0.002853	0.255819	0.372666
HCM1_differenceOfMeans_Plus_AboveCutOff	-0.00335956	0.0030316	0.267785	0.382183
HMRA2_differenceOfMeans_Plus_AboveCutOff	0.00132367	0.00292009	0.650334	0.526226
NHP10_differenceOfMeans_Plus_AboveCutOff	-0.002094	0.00341014	0.539181	0.50286
PDR8_differenceOfMeans_Plus_AboveCutOff	-0.002509	0.00268125	0.349397	0.42063
REB1_differenceOfMeans_Plus_AboveCutOff	-0.0155327	0.0239167	0.516047	0.493609
REI1_differenceOfMeans_Plus_AboveCutOff	0.00268586	0.00284913	0.345837	0.417778
RSC30_differenceOfMeans_Plus_AboveCutOff	0.00278013	0.00329513	0.398832	0.446252
RSC3_differenceOfMeans_Plus_AboveCutOff	0.00870374	0.00280642	0.00192631	0.0168369
RSF2_differenceOfMeans_Plus_AboveCutOff	0.00978297	0.00257439	0.000144626	0.00220503
STE12_differenceOfMeans_Plus_AboveCutOff	-0.000930731	0.00293744	0.751357	0.560174
STP3_differenceOfMeans_Plus_AboveCutOff	0.000324235	0.00280776	0.908066	0.604628
STP4_differenceOfMeans_Plus_AboveCutOff	-0.000737791	0.00281229	0.793055	0.572371
SWI5_differenceOfMeans_Plus_AboveCutOff	0.00107244	0.00281307	0.703029	0.548746
TOS8_differenceOfMeans_Plus_AboveCutOff	0.00439363	0.00284233	0.122156	0.252836
USV1_differenceOfMeans_Plus_AboveCutOff	0.00358277	0.00289057	0.215172	0.342572
YER130C_differenceOfMeans_Plus_AboveCutOff	0.00352301	0.00269169	0.190586	0.322915
YER184C_differenceOfMeans_Plus_AboveCutOff	0.00529985	0.00307954	0.0852531	0.200359
YLR278C_differenceOfMeans_Plus_AboveCutOff	-0.00404881	0.00309397	0.190666	0.322915
YNR063W_differenceOfMeans_Plus_AboveCutOff	-0.00298062	0.00294223	0.311037	0.403415
YOX1_differenceOfMeans_Plus_AboveCutOff	4.28239e-05	0.002906	0.988243	0.623639
YPR022C_differenceOfMeans_Plus_AboveCutOff	-0.000411652	0.00266174	0.877093	0.595407
YPR196W_differenceOfMeans_Plus_AboveCutOff	0.00234433	0.0027662	0.396722	0.446252
ACA1_differenceOfMeans_Plus_AboveCutOff	NA	NA	NA	NA
ADR1_differenceOfMeans_Plus_AboveCutOff	NA	NA	NA	NA
AFT1_differenceOfMeans_Plus_AboveCutOff	-0.000643089	0.00329612	0.845311	0.583801
DAL81_differenceOfMeans_Plus_AboveCutOff	NA	NA	NA	NA
DAL82_differenceOfMeans_Plus_AboveCutOff	-0.00142326	0.00285704	0.618372	0.52001
DIG1_differenceOfMeans_Plus_AboveCutOff	NA	NA	NA	NA
FKH1_differenceOfMeans_Plus_AboveCutOff	-0.00304804	0.00296081	0.303263	0.40161
MIG1_differenceOfMeans_Plus_AboveCutOff	-0.000868168	0.00233082	0.709541	0.548746
OPI1_differenceOfMeans_Plus_AboveCutOff	-0.00184601	0.00286131	0.518822	0.494139
PIP2_differenceOfMeans_Plus_AboveCutOff	NA	NA	NA	NA
PPR1_differenceOfMeans_Plus_AboveCutOff	1.26216e-05	0.00233207	0.995682	0.624401
RGM1_differenceOfMeans_Plus_AboveCutOff	NA	NA	NA	NA
RTG1_differenceOfMeans_Plus_AboveCutOff	NA	NA	NA	NA
SKN7_differenceOfMeans_Plus_AboveCutOff	-0.0021467	0.00415413	0.605322	0.516517
UPC2_differenceOfMeans_Plus_AboveCutOff	-0.000469321	0.0023309	0.840427	0.583446
WAR1_differenceOfMeans_Plus_AboveCutOff	NA	NA	NA	NA
XBP1_differenceOfMeans_Plus_AboveCutOff	0.000226429	0.00257775	0.930004	0.607924
AFT2_differenceOfMeans_Plus_AboveCutOff	0.0116563	0.00291395	6.32969e-05	0.00104537
MATA2_differenceOfMeans_Plus_AboveCutOff	0.00424177	0.00299516	0.156714	0.289497
MSN1_differenceOfMeans_Plus_AboveCutOff	0.000569194	0.00255286	0.823564	0.579922
NRG2_differenceOfMeans_Plus_AboveCutOff	0.00158268	0.00314038	0.614278	0.52001
ROX1_differenceOfMeans_Plus_AboveCutOff	0.00196456	0.00296592	0.507729	0.491943
DAL80_differenceOfMeans_Plus_AboveCutOff	-0.00111338	0.00296345	0.707137	0.548746
GLN3_differenceOfMeans_Plus_AboveCutOff	0.000486774	0.00254076	0.848066	0.583801
HAP4_differenceOfMeans_Plus_AboveCutOff	-0.00105015	0.00233103	0.652344	0.526226
MET4_differenceOfMeans_Plus_AboveCutOff	NA	NA	NA	NA
MOT2_differenceOfMeans_Plus_AboveCutOff	-0.000822558	0.00291239	0.77761	0.5675
MSN2_differenceOfMeans_Plus_AboveCutOff	0.000517591	0.0029437	0.860427	0.589268
MSN4_differenceOfMeans_Plus_AboveCutOff	0.00411401	0.00409119	0.314619	0.403415
NDD1_differenceOfMeans_Plus_AboveCutOff	0.0075402	0.00253812	0.00297038	0.0220504
RIM101_differenceOfMeans_Plus_AboveCutOff	-0.0012659	0.00233134	0.587134	0.514248
SOK2_differenceOfMeans_Plus_AboveCutOff	0.006204	0.00261957	0.0178687	0.0784024
SPT23_differenceOfMeans_Plus_AboveCutOff	0.00517988	0.00309697	0.0944133	0.213245
SPT2_differenceOfMeans_Plus_AboveCutOff	0.00890688	0.00406865	0.0285861	0.105831
STB1_differenceOfMeans_Plus_AboveCutOff	0.00140495	0.00233245	0.546941	0.503954
STB5_differenceOfMeans_Plus_AboveCutOff	0.00583433	0.00270165	0.0308083	0.110189
SUT1_differenceOfMeans_Plus_AboveCutOff	0.00371798	0.00295055	0.207635	0.339985
THO2_differenceOfMeans_Plus_AboveCutOff	-0.00257513	0.00271597	0.343055	0.417778
UME1_differenceOfMeans_Plus_AboveCutOff	-0.00155288	0.00330028	0.637976	0.526226
ZAP1_differenceOfMeans_Plus_AboveCutOff	NA	NA	NA	NA
ABF1_differenceOfMeans_Plus_AboveCutOff	0.00669805	0.00328444	0.0414171	0.129028
ACE2_differenceOfMeans_Plus_AboveCutOff	0.00758813	0.00295302	0.0101812	0.0547429
ARG81_differenceOfMeans_Plus_AboveCutOff	0.00227109	0.00272361	0.404363	0.449467
ASH1_differenceOfMeans_Plus_AboveCutOff	-0.00041174	0.00285996	0.885527	0.597882
AZF1_differenceOfMeans_Plus_AboveCutOff	NA	NA	NA	NA
CBF1_differenceOfMeans_Plus_AboveCutOff	0.00288533	0.00234372	0.218288	0.342572
GAL4_differenceOfMeans_Plus_AboveCutOff	NA	NA	NA	NA
GAT3_differenceOfMeans_Plus_AboveCutOff	-0.000750324	0.00293814	0.798434	0.573258
GCR2_differenceOfMeans_Plus_AboveCutOff	-0.00478402	0.00296229	0.106317	0.230035
GTS1_differenceOfMeans_Plus_AboveCutOff	-0.000610345	0.00233107	0.793452	0.572371
HAC1_differenceOfMeans_Plus_AboveCutOff	NA	NA	NA	NA
HAP2_differenceOfMeans_Plus_AboveCutOff	0.0158018	0.00236001	2.14714e-11	8.76356e-10
IME1_differenceOfMeans_Plus_AboveCutOff	0.00036501	0.00233126	0.875582	0.594879
IXR1_differenceOfMeans_Plus_AboveCutOff	NA	NA	NA	NA
JHD1_differenceOfMeans_Plus_AboveCutOff	0.000740888	0.00264971	0.779776	0.568059
MATA1_differenceOfMeans_Plus_AboveCutOff	0.00785484	0.00232822	0.000741511	0.00799261
MET32_differenceOfMeans_Plus_AboveCutOff	NA	NA	NA	NA
MOT3_differenceOfMeans_Plus_AboveCutOff	0.01489	0.00291536	3.26588e-07	7.79796e-06
PDR1_differenceOfMeans_Plus_AboveCutOff	-0.0010501	0.00233081	0.652327	0.526226
RFX1_differenceOfMeans_Plus_AboveCutOff	0.00744499	0.00232854	0.00138734	0.0128939
RGT1_differenceOfMeans_Plus_AboveCutOff	NA	NA	NA	NA
RME1_differenceOfMeans_Plus_AboveCutOff	0.00667287	0.0027701	0.0160011	0.0731774
RTG3_differenceOfMeans_Plus_AboveCutOff	-0.00113677	0.0027868	0.683339	0.540751
SKO1_differenceOfMeans_Plus_AboveCutOff	NA	NA	NA	NA
SNF1_differenceOfMeans_Plus_AboveCutOff	NA	NA	NA	NA
SNT2_differenceOfMeans_Plus_AboveCutOff	NA	NA	NA	NA
STB2_differenceOfMeans_Plus_AboveCutOff	0.00437239	0.00340915	0.199651	0.332959
STP1_differenceOfMeans_Plus_AboveCutOff	-0.00116523	0.00288369	0.686157	0.541218
SWI4_differenceOfMeans_Plus_AboveCutOff	0.00471938	0.00269081	0.0794499	0.192869
SWI6_differenceOfMeans_Plus_AboveCutOff	0.00703534	0.00267542	0.00854811	0.0473825
THI2_differenceOfMeans_Plus_AboveCutOff	0.00264874	0.00233132	0.255891	0.372666
URC2_differenceOfMeans_Plus_AboveCutOff	NA	NA	NA	NA
YHP1_differenceOfMeans_Plus_AboveCutOff	-0.00336344	0.0027084	0.214291	0.342253
YRR1_differenceOfMeans_Plus_AboveCutOff	NA	NA	NA	NA
ARG80_differenceOfMeans_Plus_AboveCutOff	-0.00315635	0.00302062	0.296053	0.39836
ARO80_differenceOfMeans_Plus_AboveCutOff	NA	NA	NA	NA
ARR1_differenceOfMeans_Plus_AboveCutOff	-0.00290837	0.00233166	0.212274	0.341371
CHA4_differenceOfMeans_Plus_AboveCutOff	-0.00157712	0.00331774	0.634531	0.526226
CUP9_differenceOfMeans_Plus_AboveCutOff	NA	NA	NA	NA
HMS1_differenceOfMeans_Plus_AboveCutOff	0.00538943	0.00278571	0.053031	0.151185
INO2_differenceOfMeans_Plus_AboveCutOff	0.00267344	0.0026487	0.312811	0.403415
MCM1_differenceOfMeans_Plus_AboveCutOff	-0.0022207	0.00233377	0.341326	0.417778
MET28_differenceOfMeans_Plus_AboveCutOff	0.000367864	0.00294224	0.900501	0.603584
MGA1_differenceOfMeans_Plus_AboveCutOff	-0.000729067	0.00285949	0.798751	0.573258
PDR3_differenceOfMeans_Plus_AboveCutOff	0.00212068	0.00323749	0.512442	0.493564
PHO4_differenceOfMeans_Plus_AboveCutOff	NA	NA	NA	NA
PUT3_differenceOfMeans_Plus_AboveCutOff	NA	NA	NA	NA
RAP1_differenceOfMeans_Plus_AboveCutOff	-0.00178065	0.00278984	0.523303	0.495319
SMP1_differenceOfMeans_Plus_AboveCutOff	0.0134392	0.00251199	8.79461e-08	2.46488e-06
UGA3_differenceOfMeans_Plus_AboveCutOff	-0.00237777	0.0023309	0.307678	0.403415
YAP3_differenceOfMeans_Plus_AboveCutOff	0.00193963	0.00272147	0.476021	0.478543
YAP5_differenceOfMeans_Plus_AboveCutOff	-0.000253517	0.00233097	0.913393	0.604628
CUP2_differenceOfMeans_Plus_AboveCutOff	NA	NA	NA	NA
GAL80_differenceOfMeans_Plus_AboveCutOff	NA	NA	NA	NA
HAP5_differenceOfMeans_Plus_AboveCutOff	-0.00185226	0.00346575	0.593032	0.514248
HSF1_differenceOfMeans_Plus_AboveCutOff	0.000541851	0.00233093	0.81618	0.57776
INO4_differenceOfMeans_Plus_AboveCutOff	-0.00163106	0.00406999	0.688603	0.542011
MATALPHA2_differenceOfMeans_Plus_AboveCutOff	-0.000266556	0.0033315	0.936229	0.608579
ORC1_differenceOfMeans_Plus_AboveCutOff	0.00899929	0.0026326	0.0006299	0.00712054
SPT15_differenceOfMeans_Plus_AboveCutOff	0.00765224	0.00275227	0.00543021	0.0344609
STB4_differenceOfMeans_Plus_AboveCutOff	NA	NA	NA	NA
SUM1_differenceOfMeans_Plus_AboveCutOff	0.00339173	0.00233053	0.145573	0.278111
UME6_differenceOfMeans_Plus_AboveCutOff	0.0280947	0.00229048	1.38158e-34	1.40613e-31
YAP1_differenceOfMeans_Plus_AboveCutOff	NA	NA	NA	NA
YDR026C_differenceOfMeans_Plus_AboveCutOff	-0.00161491	0.00310338	0.602805	0.516517
BAS1_differenceOfMeans_Plus_AboveCutOff	-0.00118386	0.00415299	0.775597	0.567049
CAD1_differenceOfMeans_Plus_AboveCutOff	NA	NA	NA	NA
CIN5_differenceOfMeans_Plus_AboveCutOff	0.00862892	0.00264809	0.00111984	0.0109745
CRZ1_differenceOfMeans_Plus_AboveCutOff	0.0091363	0.00296256	0.00204293	0.0173889
ERT1_differenceOfMeans_Plus_AboveCutOff	-0.00142923	0.00277054	0.605947	0.516517
GCN4_differenceOfMeans_Plus_AboveCutOff	0.00526119	0.00247296	0.0333795	0.114116
GCR1_differenceOfMeans_Plus_AboveCutOff	-0.000698663	0.003217	0.828069	0.580827
HAP1_differenceOfMeans_Plus_AboveCutOff	0.00265677	0.00262764	0.311976	0.403415
HAP3_differenceOfMeans_Plus_AboveCutOff	-0.000326973	0.00312641	0.916706	0.604672
LEU3_differenceOfMeans_Plus_AboveCutOff	NA	NA	NA	NA
MAC1_differenceOfMeans_Plus_AboveCutOff	0.00514468	0.0026596	0.053066	0.151185
MBP1_differenceOfMeans_Plus_AboveCutOff	0.00286821	0.00270216	0.288485	0.395387
MET31_differenceOfMeans_Plus_AboveCutOff	NA	NA	NA	NA
NRG1_differenceOfMeans_Plus_AboveCutOff	0.00466908	0.00317491	0.141394	0.272495
PHD1_differenceOfMeans_Plus_AboveCutOff	0.00140501	0.00294548	0.633358	0.526226
RLM1_differenceOfMeans_Plus_AboveCutOff	0.0238367	0.0030296	3.60576e-15	3.07524e-13
RPH1_differenceOfMeans_Plus_AboveCutOff	-0.000108726	0.00269064	0.967767	0.619653
RPN4_differenceOfMeans_Plus_AboveCutOff	NA	NA	NA	NA
SIP4_differenceOfMeans_Plus_AboveCutOff	NA	NA	NA	NA
TEC1_differenceOfMeans_Plus_AboveCutOff	0.00246888	0.00308301	0.423245	0.460137
TYE7_differenceOfMeans_Plus_AboveCutOff	0.00606445	0.00301351	0.0441756	0.134844
YAP6_differenceOfMeans_Plus_AboveCutOff	0.00274216	0.0028839	0.341679	0.417778
YAP7_differenceOfMeans_Plus_AboveCutOff	0.000858331	0.00252089	0.733489	0.55475
RDS2_differenceOfMeans_Plus_AboveCutOff	0.00674073	0.00290646	0.020383	0.0868439
YGR067C_differenceOfMeans_Plus_AboveCutOff	-0.000288211	0.00295004	0.922172	0.606825
YML081W_differenceOfMeans_Plus_AboveCutOff	0.00596775	0.00265993	0.0248599	0.0981811
ASG1_differenceOfMeans_Plus_AboveCutOff	-0.00170818	0.00278937	0.54028	0.502887
CEP3_differenceOfMeans_Plus_AboveCutOff	NA	NA	NA	NA
DOT6_differenceOfMeans_Plus_AboveCutOff	-0.000589747	0.00289912	0.838805	0.583446
ECM22_differenceOfMeans_Plus_AboveCutOff	-0.0020377	0.00309895	0.51083	0.492888
FHL1_differenceOfMeans_Plus_AboveCutOff	0.00182631	0.00290802	0.529987	0.499444
GAT1_differenceOfMeans_Plus_AboveCutOff	0.00551661	0.00275996	0.0456297	0.136641
GAT4_differenceOfMeans_Plus_AboveCutOff	-0.000257181	0.00233151	0.912166	0.604628
HAL9_differenceOfMeans_Plus_AboveCutOff	0.0204138	0.00291286	2.41463e-12	1.22776e-10
LYS14_differenceOfMeans_Plus_AboveCutOff	NA	NA	NA	NA
MIG2_differenceOfMeans_Plus_AboveCutOff	-0.00237079	0.00268229	0.376766	0.435182
MIG3_differenceOfMeans_Plus_AboveCutOff	NA	NA	NA	NA
NDT80_differenceOfMeans_Plus_AboveCutOff	-0.000467654	0.00428025	0.912997	0.604628
NHP6A_differenceOfMeans_Plus_AboveCutOff	0.00162929	0.00282085	0.563541	0.508886
NHP6B_differenceOfMeans_Plus_AboveCutOff	-0.00198259	0.00359465	0.581264	0.51393
OAF1_differenceOfMeans_Plus_AboveCutOff	-0.00187076	0.00336554	0.578308	0.51384
PHO2_differenceOfMeans_Plus_AboveCutOff	-0.000764206	0.00260963	0.769644	0.564839
RDR1_differenceOfMeans_Plus_AboveCutOff	NA	NA	NA	NA
RDS1_differenceOfMeans_Plus_AboveCutOff	NA	NA	NA	NA
SFL1_differenceOfMeans_Plus_AboveCutOff	-0.00190138	0.00291159	0.513732	0.493609
SFP1_differenceOfMeans_Plus_AboveCutOff	0.00919571	0.0029469	0.00180561	0.0159651
SRD1_differenceOfMeans_Plus_AboveCutOff	NA	NA	NA	NA
STB3_differenceOfMeans_Plus_AboveCutOff	NA	NA	NA	NA
STP2_differenceOfMeans_Plus_AboveCutOff	0.00604291	0.00375051	0.107131	0.230745
SUT2_differenceOfMeans_Plus_AboveCutOff	NA	NA	NA	NA
TBF1_differenceOfMeans_Plus_AboveCutOff	0.000840486	0.00255426	0.742116	0.557949
TBS1_differenceOfMeans_Plus_AboveCutOff	-0.00125395	0.00233136	0.590672	0.514248
TEA1_differenceOfMeans_Plus_AboveCutOff	NA	NA	NA	NA
TOD6_differenceOfMeans_Plus_AboveCutOff	0.00727316	0.00258349	0.00487408	0.0323213
YKL222C_differenceOfMeans_Plus_AboveCutOff	-0.00237711	0.00281407	0.398265	0.446252
YLL054C_differenceOfMeans_Plus_AboveCutOff	NA	NA	NA	NA
YPR013C_differenceOfMeans_Plus_AboveCutOff	0.00213031	0.00233095	0.360758	0.423229
YPR015C_differenceOfMeans_Plus_AboveCutOff	NA	NA	NA	NA
YRM1_differenceOfMeans_Plus_AboveCutOff	NA	NA	NA	NA
ABF2_deltaSignificantBindingSites_Plus_AboveCutOff	0.00156834	0.00329576	0.634169	0.526226
CAT8_deltaSignificantBindingSites_Plus_AboveCutOff	0.0010145	0.00312653	0.745573	0.557949
CST6_deltaSignificantBindingSites_Plus_AboveCutOff	0.00828575	0.00300584	0.00584153	0.0364616
ECM23_deltaSignificantBindingSites_Plus_AboveCutOff	-0.00129695	0.00288884	0.653466	0.526348
EDS1_deltaSignificantBindingSites_Plus_AboveCutOff	NA	NA	NA	NA
FKH2_deltaSignificantBindingSites_Plus_AboveCutOff	-0.00146253	0.00275854	0.595986	0.514248
FZF1_deltaSignificantBindingSites_Plus_AboveCutOff	0.000907894	0.00279854	0.745622	0.557949
GIS1_deltaSignificantBindingSites_Plus_AboveCutOff	0.00427036	0.0025782	0.0976549	0.217064
GSM1_deltaSignificantBindingSites_Plus_AboveCutOff	0.00712434	0.00312793	0.0227473	0.0930082
GZF3_deltaSignificantBindingSites_Plus_AboveCutOff	0.00285644	0.0028393	0.314398	0.403415
HCM1_deltaSignificantBindingSites_Plus_AboveCutOff	-0.00214089	0.00299269	0.474379	0.478543
HMRA2_deltaSignificantBindingSites_Plus_AboveCutOff	0.00167827	0.00293298	0.567182	0.51022
NHP10_deltaSignificantBindingSites_Plus_AboveCutOff	-0.00202399	0.00329612	0.539181	0.50286
PDR8_deltaSignificantBindingSites_Plus_AboveCutOff	-0.00225575	0.00271183	0.405511	0.449792
REB1_deltaSignificantBindingSites_Plus_AboveCutOff	NA	NA	NA	NA
REI1_deltaSignificantBindingSites_Plus_AboveCutOff	0.00284741	0.00275843	0.301952	0.40161
RSC30_deltaSignificantBindingSites_Plus_AboveCutOff	0.00278013	0.00329513	0.398832	0.446252
RSC3_deltaSignificantBindingSites_Plus_AboveCutOff	0.0133067	0.00290647	4.68736e-06	9.43352e-05
RSF2_deltaSignificantBindingSites_Plus_AboveCutOff	0.00957852	0.00257571	0.000200176	0.00279029
STE12_deltaSignificantBindingSites_Plus_AboveCutOff	-0.0006811	0.00297089	0.818668	0.57776
STP3_deltaSignificantBindingSites_Plus_AboveCutOff	0.000680561	0.0027581	0.805102	0.57578
STP4_deltaSignificantBindingSites_Plus_AboveCutOff	-0.000522095	0.00280152	0.852161	0.585088
SWI5_deltaSignificantBindingSites_Plus_AboveCutOff	0.000358389	0.00282777	0.899147	0.603564
TOS8_deltaSignificantBindingSites_Plus_AboveCutOff	0.00353053	0.00286509	0.217853	0.342572
USV1_deltaSignificantBindingSites_Plus_AboveCutOff	0.00430019	0.00284585	0.130778	0.262315
YER130C_deltaSignificantBindingSites_Plus_AboveCutOff	0.00314899	0.00266597	0.237531	0.360228
YER184C_deltaSignificantBindingSites_Plus_AboveCutOff	0.00790321	0.00302087	0.00889136	0.048949
YLR278C_deltaSignificantBindingSites_Plus_AboveCutOff	-0.00374153	0.0029928	0.211235	0.341371
YNR063W_deltaSignificantBindingSites_Plus_AboveCutOff	-0.0028764	0.00300819	0.338976	0.417778
YOX1_deltaSignificantBindingSites_Plus_AboveCutOff	-0.000350484	0.00287799	0.903073	0.603704
YPR022C_deltaSignificantBindingSites_Plus_AboveCutOff	-0.000513428	0.0026779	0.847955	0.583801
YPR196W_deltaSignificantBindingSites_Plus_AboveCutOff	0.00285703	0.00277845	0.303816	0.40161
ACA1_deltaSignificantBindingSites_Plus_AboveCutOff	NA	NA	NA	NA
ADR1_deltaSignificantBindingSites_Plus_AboveCutOff	NA	NA	NA	NA
AFT1_deltaSignificantBindingSites_Plus_AboveCutOff	-0.000643089	0.00329612	0.845311	0.583801
DAL81_deltaSignificantBindingSites_Plus_AboveCutOff	NA	NA	NA	NA
DAL82_deltaSignificantBindingSites_Plus_AboveCutOff	-0.00140233	0.00285456	0.623244	0.521675
DIG1_deltaSignificantBindingSites_Plus_AboveCutOff	NA	NA	NA	NA
FKH1_deltaSignificantBindingSites_Plus_AboveCutOff	-0.00316482	0.00300878	0.292863	0.397305
MIG1_deltaSignificantBindingSites_Plus_AboveCutOff	-0.000868168	0.00233082	0.709541	0.548746
OPI1_deltaSignificantBindingSites_Plus_AboveCutOff	-0.00192093	0.0028548	0.501024	0.488068
PIP2_deltaSignificantBindingSites_Plus_AboveCutOff	NA	NA	NA	NA
PPR1_deltaSignificantBindingSites_Plus_AboveCutOff	1.26216e-05	0.00233207	0.995682	0.624401
RGM1_deltaSignificantBindingSites_Plus_AboveCutOff	NA	NA	NA	NA
RTG1_deltaSignificantBindingSites_Plus_AboveCutOff	NA	NA	NA	NA
SKN7_deltaSignificantBindingSites_Plus_AboveCutOff	-0.00208588	0.00403643	0.605322	0.516517
UPC2_deltaSignificantBindingSites_Plus_AboveCutOff	-0.000469321	0.0023309	0.840427	0.583446
WAR1_deltaSignificantBindingSites_Plus_AboveCutOff	NA	NA	NA	NA
XBP1_deltaSignificantBindingSites_Plus_AboveCutOff	0.000215136	0.00252021	0.931972	0.607924
AFT2_deltaSignificantBindingSites_Plus_AboveCutOff	0.0105375	0.00291777	0.000304456	0.00376019
MATA2_deltaSignificantBindingSites_Plus_AboveCutOff	0.00464638	0.00294672	0.114843	0.242024
MSN1_deltaSignificantBindingSites_Plus_AboveCutOff	0.00068461	0.00253461	0.78708	0.5698
NRG2_deltaSignificantBindingSites_Plus_AboveCutOff	0.00168226	0.0030826	0.585253	0.514248
ROX1_deltaSignificantBindingSites_Plus_AboveCutOff	0.00245296	0.00299218	0.412336	0.453669
DAL80_deltaSignificantBindingSites_Plus_AboveCutOff	-0.00111338	0.00296345	0.707137	0.548746
GLN3_deltaSignificantBindingSites_Plus_AboveCutOff	0.000311837	0.0025348	0.90209	0.603704
HAP4_deltaSignificantBindingSites_Plus_AboveCutOff	-0.00105015	0.00233103	0.652344	0.526226
MET4_deltaSignificantBindingSites_Plus_AboveCutOff	NA	NA	NA	NA
MOT2_deltaSignificantBindingSites_Plus_AboveCutOff	-0.00063848	0.00292247	0.827061	0.580827
MSN2_deltaSignificantBindingSites_Plus_AboveCutOff	0.000222234	0.00269174	0.9342	0.608223
MSN4_deltaSignificantBindingSites_Plus_AboveCutOff	0.00405762	0.00403511	0.314619	0.403415
NDD1_deltaSignificantBindingSites_Plus_AboveCutOff	0.00631201	0.00247296	0.010698	0.0559715
RIM101_deltaSignificantBindingSites_Plus_AboveCutOff	-0.0012659	0.00233134	0.587134	0.514248
SOK2_deltaSignificantBindingSites_Plus_AboveCutOff	0.00591339	0.00260521	0.0232179	0.0944552
SPT23_deltaSignificantBindingSites_Plus_AboveCutOff	0.00591297	0.0032106	0.0655188	0.172332
SPT2_deltaSignificantBindingSites_Plus_AboveCutOff	0.00543305	0.00403693	0.178355	0.311264
STB1_deltaSignificantBindingSites_Plus_AboveCutOff	0.00123896	0.00233248	0.595297	0.514248
STB5_deltaSignificantBindingSites_Plus_AboveCutOff	0.00380467	0.00265108	0.151247	0.284348
SUT1_deltaSignificantBindingSites_Plus_AboveCutOff	0.00361607	0.00300917	0.229486	0.351976
THO2_deltaSignificantBindingSites_Plus_AboveCutOff	-0.00258048	0.00278669	0.354445	0.421938
UME1_deltaSignificantBindingSites_Plus_AboveCutOff	-0.00155288	0.00330028	0.637976	0.526226
ZAP1_deltaSignificantBindingSites_Plus_AboveCutOff	NA	NA	NA	NA
ABF1_deltaSignificantBindingSites_Plus_AboveCutOff	0.00672777	0.00329495	0.0411669	0.129028
ACE2_deltaSignificantBindingSites_Plus_AboveCutOff	0.00747458	0.00291928	0.0104546	0.0556595
ARG81_deltaSignificantBindingSites_Plus_AboveCutOff	0.00187513	0.0026815	0.484376	0.480501
ASH1_deltaSignificantBindingSites_Plus_AboveCutOff	-0.000243795	0.00289545	0.932898	0.607924
AZF1_deltaSignificantBindingSites_Plus_AboveCutOff	NA	NA	NA	NA
CBF1_deltaSignificantBindingSites_Plus_AboveCutOff	0.002869	0.00233045	0.218288	0.342572
GAL4_deltaSignificantBindingSites_Plus_AboveCutOff	NA	NA	NA	NA
GAT3_deltaSignificantBindingSites_Plus_AboveCutOff	-0.000584812	0.00293478	0.842052	0.583801
GCR2_deltaSignificantBindingSites_Plus_AboveCutOff	-0.00478402	0.00296229	0.106317	0.230035
GTS1_deltaSignificantBindingSites_Plus_AboveCutOff	-0.000666428	0.00233109	0.774965	0.567049
HAC1_deltaSignificantBindingSites_Plus_AboveCutOff	NA	NA	NA	NA
HAP2_deltaSignificantBindingSites_Plus_AboveCutOff	0.0142388	0.00232181	8.64414e-10	2.83697e-08
IME1_deltaSignificantBindingSites_Plus_AboveCutOff	0.00036501	0.00233126	0.875582	0.594879
IXR1_deltaSignificantBindingSites_Plus_AboveCutOff	NA	NA	NA	NA
JHD1_deltaSignificantBindingSites_Plus_AboveCutOff	0.000793443	0.00265801	0.765314	0.563337
MATA1_deltaSignificantBindingSites_Plus_AboveCutOff	0.00806479	0.00232806	0.000531877	0.00614242
MET32_deltaSignificantBindingSites_Plus_AboveCutOff	NA	NA	NA	NA
MOT3_deltaSignificantBindingSites_Plus_AboveCutOff	0.0151469	0.00307526	8.41918e-07	1.91796e-05
PDR1_deltaSignificantBindingSites_Plus_AboveCutOff	NA	NA	NA	NA
RFX1_deltaSignificantBindingSites_Plus_AboveCutOff	0.00744499	0.00232854	0.00138734	0.0128939
RGT1_deltaSignificantBindingSites_Plus_AboveCutOff	NA	NA	NA	NA
RME1_deltaSignificantBindingSites_Plus_AboveCutOff	0.00666331	0.00277284	0.0162584	0.0735265
RTG3_deltaSignificantBindingSites_Plus_AboveCutOff	-0.00116447	0.00285471	0.683339	0.540751
SKO1_deltaSignificantBindingSites_Plus_AboveCutOff	NA	NA	NA	NA
SNF1_deltaSignificantBindingSites_Plus_AboveCutOff	NA	NA	NA	NA
SNT2_deltaSignificantBindingSites_Plus_AboveCutOff	NA	NA	NA	NA
STB2_deltaSignificantBindingSites_Plus_AboveCutOff	0.00490681	0.00347219	0.157604	0.289497
STP1_deltaSignificantBindingSites_Plus_AboveCutOff	-0.00115574	0.00285595	0.685715	0.541218
SWI4_deltaSignificantBindingSites_Plus_AboveCutOff	0.00410182	0.00273245	0.133317	0.264466
SWI6_deltaSignificantBindingSites_Plus_AboveCutOff	0.00706778	0.00266269	0.00794547	0.0450114
THI2_deltaSignificantBindingSites_Plus_AboveCutOff	NA	NA	NA	NA
URC2_deltaSignificantBindingSites_Plus_AboveCutOff	NA	NA	NA	NA
YHP1_deltaSignificantBindingSites_Plus_AboveCutOff	-0.00336344	0.0027084	0.214291	0.342253
YRR1_deltaSignificantBindingSites_Plus_AboveCutOff	NA	NA	NA	NA
ARG80_deltaSignificantBindingSites_Plus_AboveCutOff	-0.00309639	0.00300915	0.303485	0.40161
ARO80_deltaSignificantBindingSites_Plus_AboveCutOff	NA	NA	NA	NA
ARR1_deltaSignificantBindingSites_Plus_AboveCutOff	-0.0029291	0.00233164	0.20903	0.341237
CHA4_deltaSignificantBindingSites_Plus_AboveCutOff	-0.00156763	0.00329777	0.634531	0.526226
CUP9_deltaSignificantBindingSites_Plus_AboveCutOff	NA	NA	NA	NA
HMS1_deltaSignificantBindingSites_Plus_AboveCutOff	0.00695435	0.00287342	0.0155106	0.0727772
INO2_deltaSignificantBindingSites_Plus_AboveCutOff	0.00288842	0.00255421	0.258119	0.374649
MCM1_deltaSignificantBindingSites_Plus_AboveCutOff	-0.00222628	0.00233376	0.340111	0.417778
MET28_deltaSignificantBindingSites_Plus_AboveCutOff	0.000400834	0.00285517	0.888353	0.599022
MGA1_deltaSignificantBindingSites_Plus_AboveCutOff	-0.000785464	0.00289164	0.785904	0.569457
PDR3_deltaSignificantBindingSites_Plus_AboveCutOff	0.00180305	0.00329579	0.584326	0.514248
PHO4_deltaSignificantBindingSites_Plus_AboveCutOff	NA	NA	NA	NA
PUT3_deltaSignificantBindingSites_Plus_AboveCutOff	NA	NA	NA	NA
RAP1_deltaSignificantBindingSites_Plus_AboveCutOff	-0.00112025	0.00300955	0.709722	0.548746
SMP1_deltaSignificantBindingSites_Plus_AboveCutOff	0.0140602	0.00252814	2.67527e-08	8.09139e-07
UGA3_deltaSignificantBindingSites_Plus_AboveCutOff	-0.00240489	0.00233088	0.30219	0.40161
YAP3_deltaSignificantBindingSites_Plus_AboveCutOff	0.00297956	0.00271818	0.273009	0.387254
YAP5_deltaSignificantBindingSites_Plus_AboveCutOff	-0.000253517	0.00233097	0.913393	0.604628
CUP2_deltaSignificantBindingSites_Plus_AboveCutOff	NA	NA	NA	NA
GAL80_deltaSignificantBindingSites_Plus_AboveCutOff	NA	NA	NA	NA
HAP5_deltaSignificantBindingSites_Plus_AboveCutOff	-0.00167523	0.00329599	0.61127	0.519243
HSF1_deltaSignificantBindingSites_Plus_AboveCutOff	0.000546578	0.00233093	0.814605	0.57776
INO4_deltaSignificantBindingSites_Plus_AboveCutOff	-0.00142654	0.00403721	0.723828	0.552013
MATALPHA2_deltaSignificantBindingSites_Plus_AboveCutOff	4.96205e-05	0.00329767	0.987995	0.623639
ORC1_deltaSignificantBindingSites_Plus_AboveCutOff	0.00891514	0.00264004	0.000733098	0.00799261
SPT15_deltaSignificantBindingSites_Plus_AboveCutOff	0.00857357	0.00290559	0.00317032	0.023316
STB4_deltaSignificantBindingSites_Plus_AboveCutOff	NA	NA	NA	NA
SUM1_deltaSignificantBindingSites_Plus_AboveCutOff	0.00354954	0.00233046	0.127733	0.258444
UME6_deltaSignificantBindingSites_Plus_AboveCutOff	0.0280947	0.00229048	1.38158e-34	1.40613e-31
YAP1_deltaSignificantBindingSites_Plus_AboveCutOff	NA	NA	NA	NA
YDR026C_deltaSignificantBindingSites_Plus_AboveCutOff	-0.00171623	0.00329809	0.602805	0.516517
BAS1_deltaSignificantBindingSites_Plus_AboveCutOff	-0.001151	0.00403771	0.775597	0.567049
CAD1_deltaSignificantBindingSites_Plus_AboveCutOff	NA	NA	NA	NA
CIN5_deltaSignificantBindingSites_Plus_AboveCutOff	0.00885631	0.00265482	0.00085014	0.00875687
CRZ1_deltaSignificantBindingSites_Plus_AboveCutOff	0.0100659	0.00300387	0.000805252	0.00834821
ERT1_deltaSignificantBindingSites_Plus_AboveCutOff	-0.00126883	0.00275823	0.645506	0.526226
GCN4_deltaSignificantBindingSites_Plus_AboveCutOff	0.00431136	0.00249265	0.0836968	0.198806
GCR1_deltaSignificantBindingSites_Plus_AboveCutOff	-0.000715941	0.00329655	0.828069	0.580827
HAP1_deltaSignificantBindingSites_Plus_AboveCutOff	0.00253427	0.00269119	0.346351	0.417893
HAP3_deltaSignificantBindingSites_Plus_AboveCutOff	-0.000344718	0.00329608	0.916706	0.604672
LEU3_deltaSignificantBindingSites_Plus_AboveCutOff	NA	NA	NA	NA
MAC1_deltaSignificantBindingSites_Plus_AboveCutOff	0.00490882	0.00269137	0.0681652	0.176714
MBP1_deltaSignificantBindingSites_Plus_AboveCutOff	0.00239909	0.00269501	0.37336	0.433716
MET31_deltaSignificantBindingSites_Plus_AboveCutOff	NA	NA	NA	NA
NRG1_deltaSignificantBindingSites_Plus_AboveCutOff	0.0044869	0.00312646	0.151248	0.284348
PHD1_deltaSignificantBindingSites_Plus_AboveCutOff	0.00155199	0.00297179	0.601503	0.516517
RLM1_deltaSignificantBindingSites_Plus_AboveCutOff	0.0219133	0.00298981	2.31321e-13	1.65791e-11
RPH1_deltaSignificantBindingSites_Plus_AboveCutOff	-0.000298987	0.00265951	0.910489	0.604628
RPN4_deltaSignificantBindingSites_Plus_AboveCutOff	NA	NA	NA	NA
SIP4_deltaSignificantBindingSites_Plus_AboveCutOff	NA	NA	NA	NA
TEC1_deltaSignificantBindingSites_Plus_AboveCutOff	0.00205084	0.0030521	0.501621	0.488356
TYE7_deltaSignificantBindingSites_Plus_AboveCutOff	0.00578672	0.00312582	0.0641313	0.169785
YAP6_deltaSignificantBindingSites_Plus_AboveCutOff	0.00223426	0.00285474	0.433833	0.464419
YAP7_deltaSignificantBindingSites_Plus_AboveCutOff	0.000767457	0.00251806	0.760533	0.563232
RDS2_deltaSignificantBindingSites_Plus_AboveCutOff	0.00707011	0.00292081	0.015495	0.0727772
YGR067C_deltaSignificantBindingSites_Plus_AboveCutOff	-0.000558249	0.00293618	0.849209	0.583801
YML081W_deltaSignificantBindingSites_Plus_AboveCutOff	0.004412	0.00271445	0.104083	0.227629
ASG1_deltaSignificantBindingSites_Plus_AboveCutOff	-0.00175266	0.00285608	0.53944	0.50286
CEP3_deltaSignificantBindingSites_Plus_AboveCutOff	NA	NA	NA	NA
DOT6_deltaSignificantBindingSites_Plus_AboveCutOff	-0.00225365	0.00285437	0.429796	0.462534
ECM22_deltaSignificantBindingSites_Plus_AboveCutOff	-0.00216766	0.00329659	0.51083	0.492888
FHL1_deltaSignificantBindingSites_Plus_AboveCutOff	0.00213836	0.00285516	0.45389	0.470333
GAT1_deltaSignificantBindingSites_Plus_AboveCutOff	0.00566624	0.00268994	0.0351645	0.117202
GAT4_deltaSignificantBindingSites_Plus_AboveCutOff	-0.000256529	0.00233151	0.912388	0.604628
HAL9_deltaSignificantBindingSites_Plus_AboveCutOff	0.0218499	0.0029294	8.72988e-14	6.842e-12
LYS14_deltaSignificantBindingSites_Plus_AboveCutOff	NA	NA	NA	NA
MIG2_deltaSignificantBindingSites_Plus_AboveCutOff	-0.00235678	0.00269105	0.381147	0.438167
MIG3_deltaSignificantBindingSites_Plus_AboveCutOff	NA	NA	NA	NA
NDT80_deltaSignificantBindingSites_Plus_AboveCutOff	-0.000509215	0.00466065	0.912997	0.604628
NHP6A_deltaSignificantBindingSites_Plus_AboveCutOff	0.00103704	0.00282969	0.714002	0.549566
NHP6B_deltaSignificantBindingSites_Plus_AboveCutOff	-0.00137518	0.00300869	0.647622	0.526226
OAF1_deltaSignificantBindingSites_Plus_AboveCutOff	-0.00194322	0.00355992	0.585162	0.514248
PHO2_deltaSignificantBindingSites_Plus_AboveCutOff	-0.000787695	0.00259544	0.761515	0.563232
RDR1_deltaSignificantBindingSites_Plus_AboveCutOff	NA	NA	NA	NA
RDS1_deltaSignificantBindingSites_Plus_AboveCutOff	NA	NA	NA	NA
SFL1_deltaSignificantBindingSites_Plus_AboveCutOff	-0.00181918	0.00289842	0.530238	0.499444
SFP1_deltaSignificantBindingSites_Plus_AboveCutOff	0.00686809	0.00289947	0.0178488	0.0784024
SRD1_deltaSignificantBindingSites_Plus_AboveCutOff	NA	NA	NA	NA
STB3_deltaSignificantBindingSites_Plus_AboveCutOff	NA	NA	NA	NA
STP2_deltaSignificantBindingSites_Plus_AboveCutOff	0.00564545	0.00368438	0.125457	0.256338
SUT2_deltaSignificantBindingSites_Plus_AboveCutOff	NA	NA	NA	NA
TBF1_deltaSignificantBindingSites_Plus_AboveCutOff	0.000983421	0.0026065	0.705954	0.548746
TBS1_deltaSignificantBindingSites_Plus_AboveCutOff	-0.00125395	0.00233136	0.590672	0.514248
TEA1_deltaSignificantBindingSites_Plus_AboveCutOff	NA	NA	NA	NA
TOD6_deltaSignificantBindingSites_Plus_AboveCutOff	0.00720514	0.00253196	0.00443166	0.0304679
YKL222C_deltaSignificantBindingSites_Plus_AboveCutOff	-0.00218422	0.00269143	0.417052	0.45685
YLL054C_deltaSignificantBindingSites_Plus_AboveCutOff	NA	NA	NA	NA
YPR013C_deltaSignificantBindingSites_Plus_AboveCutOff	0.00229437	0.00233087	0.324949	0.40991
YPR015C_deltaSignificantBindingSites_Plus_AboveCutOff	NA	NA	NA	NA
YRM1_deltaSignificantBindingSites_Plus_AboveCutOff	NA	NA	NA	NA
metaChangeInNumberOfTFBS_Plus_AboveCutOff	0.0233723	0.00289704	7.16558e-16	7.51104e-14
metaAverage_differenceOfMeans_Plus_AboveCutOff	0.0252451	0.00290293	3.42485e-18	4.89765e-16
metaMax_differenceOfMeans_Plus_AboveCutOff	0.0190724	0.00282423	1.44671e-11	6.66986e-10
metaAverage_differenceOfMax_Plus_AboveCutOff	0.0251398	0.00290531	5.01399e-18	6.70356e-16
metaMax_differenceOfMax_Plus_AboveCutOff	0.0190191	0.00282447	1.65421e-11	7.2539e-10
ABF2_differenceOfMax_Minus_AboveCutOff	0.00153627	0.00325638	0.63709	0.526226
CAT8_differenceOfMax_Minus_AboveCutOff	-0.00308732	0.00356215	0.386105	0.439095
CST6_differenceOfMax_Minus_AboveCutOff	0.00399625	0.00320304	0.212162	0.341371
ECM23_differenceOfMax_Minus_AboveCutOff	-0.00300329	0.00295789	0.30994	0.403415
EDS1_differenceOfMax_Minus_AboveCutOff	NA	NA	NA	NA
FKH2_differenceOfMax_Minus_AboveCutOff	-0.000877956	0.00276077	0.750476	0.560174
FZF1_differenceOfMax_Minus_AboveCutOff	-0.00101085	0.00285452	0.723246	0.552013
GIS1_differenceOfMax_Minus_AboveCutOff	0.00290497	0.00322995	0.368448	0.429239
GSM1_differenceOfMax_Minus_AboveCutOff	0.00859591	0.00323312	0.00784421	0.0450114
GZF3_differenceOfMax_Minus_AboveCutOff	0.00443443	0.00290168	0.126456	0.257143
HCM1_differenceOfMax_Minus_AboveCutOff	0.0035241	0.0029917	0.238813	0.36116
HMRA2_differenceOfMax_Minus_AboveCutOff	0.000954503	0.00261197	0.714787	0.549566
NHP10_differenceOfMax_Minus_AboveCutOff	0.00249755	0.0024906	0.315962	0.403415
PDR8_differenceOfMax_Minus_AboveCutOff	4.68228e-05	0.00288357	0.987045	0.623634
REB1_differenceOfMax_Minus_AboveCutOff	-0.00204611	0.00290581	0.481342	0.478955
REI1_differenceOfMax_Minus_AboveCutOff	NA	NA	NA	NA
RSC30_differenceOfMax_Minus_AboveCutOff	0.00144972	0.00280436	0.605189	0.516517
RSC3_differenceOfMax_Minus_AboveCutOff	0.00850578	0.00272736	0.00181656	0.0159651
RSF2_differenceOfMax_Minus_AboveCutOff	0.0114643	0.00310972	0.000227265	0.00303785
STE12_differenceOfMax_Minus_AboveCutOff	-0.00206676	0.0027896	0.458766	0.471593
STP3_differenceOfMax_Minus_AboveCutOff	6.13366e-05	0.00259627	0.981152	0.622576
STP4_differenceOfMax_Minus_AboveCutOff	0.000989153	0.00273283	0.717388	0.550783
SWI5_differenceOfMax_Minus_AboveCutOff	0.00272873	0.0026721	0.307162	0.403415
TOS8_differenceOfMax_Minus_AboveCutOff	-0.00130092	0.00284145	0.64707	0.526226
USV1_differenceOfMax_Minus_AboveCutOff	0.00257018	0.00279783	0.358288	0.422683
YER130C_differenceOfMax_Minus_AboveCutOff	-0.000419991	0.00316412	0.894403	0.600865
YER184C_differenceOfMax_Minus_AboveCutOff	0.0114909	0.00311193	0.000222049	0.00301742
YLR278C_differenceOfMax_Minus_AboveCutOff	0.00178616	0.00290931	0.539252	0.50286
YNR063W_differenceOfMax_Minus_AboveCutOff	-0.000636407	0.00258624	0.805625	0.57578
YOX1_differenceOfMax_Minus_AboveCutOff	0.00156401	0.00294236	0.595038	0.514248
YPR022C_differenceOfMax_Minus_AboveCutOff	0.0034957	0.00280455	0.212603	0.341371
YPR196W_differenceOfMax_Minus_AboveCutOff	0.00492848	0.00286454	0.0853391	0.200359
ACA1_differenceOfMax_Minus_AboveCutOff	NA	NA	NA	NA
ADR1_differenceOfMax_Minus_AboveCutOff	NA	NA	NA	NA
AFT1_differenceOfMax_Minus_AboveCutOff	-0.000782959	0.00328503	0.811616	0.577267
DAL81_differenceOfMax_Minus_AboveCutOff	0.00139247	0.00233113	0.550283	0.503954
DAL82_differenceOfMax_Minus_AboveCutOff	NA	NA	NA	NA
DIG1_differenceOfMax_Minus_AboveCutOff	NA	NA	NA	NA
FKH1_differenceOfMax_Minus_AboveCutOff	0.000245481	0.00279657	0.930052	0.607924
MIG1_differenceOfMax_Minus_AboveCutOff	NA	NA	NA	NA
OPI1_differenceOfMax_Minus_AboveCutOff	-0.00224358	0.00293487	0.444596	0.467007
PIP2_differenceOfMax_Minus_AboveCutOff	-0.00141021	0.00233133	0.545249	0.503935
PPR1_differenceOfMax_Minus_AboveCutOff	NA	NA	NA	NA
RGM1_differenceOfMax_Minus_AboveCutOff	-0.000696765	0.00233233	0.765136	0.563337
RTG1_differenceOfMax_Minus_AboveCutOff	NA	NA	NA	NA
SKN7_differenceOfMax_Minus_AboveCutOff	0.000578492	0.00233145	0.804037	0.575405
UPC2_differenceOfMax_Minus_AboveCutOff	NA	NA	NA	NA
WAR1_differenceOfMax_Minus_AboveCutOff	NA	NA	NA	NA
XBP1_differenceOfMax_Minus_AboveCutOff	-0.00189785	0.0026841	0.479522	0.478567
AFT2_differenceOfMax_Minus_AboveCutOff	-0.00301531	0.0026788	0.260326	0.375316
MATA2_differenceOfMax_Minus_AboveCutOff	0.00370975	0.00268676	0.167356	0.300426
MSN1_differenceOfMax_Minus_AboveCutOff	0.000831046	0.00255936	0.745401	0.557949
NRG2_differenceOfMax_Minus_AboveCutOff	0.00281882	0.00280866	0.315564	0.403415
ROX1_differenceOfMax_Minus_AboveCutOff	0.00745979	0.00292346	0.0107197	0.0559715
DAL80_differenceOfMax_Minus_AboveCutOff	0.00158131	0.00298789	0.596639	0.514248
GLN3_differenceOfMax_Minus_AboveCutOff	0.0030125	0.0028158	0.284685	0.394001
HAP4_differenceOfMax_Minus_AboveCutOff	-0.00213623	0.00333867	0.522274	0.495319
MET4_differenceOfMax_Minus_AboveCutOff	-0.00134707	0.00233359	0.56377	0.508886
MOT2_differenceOfMax_Minus_AboveCutOff	-0.0033144	0.00347501	0.340195	0.417778
MSN2_differenceOfMax_Minus_AboveCutOff	-0.00176511	0.00367897	0.631381	0.525775
MSN4_differenceOfMax_Minus_AboveCutOff	0.00363752	0.00265357	0.170437	0.301924
NDD1_differenceOfMax_Minus_AboveCutOff	-0.00311074	0.00389483	0.424474	0.460469
RIM101_differenceOfMax_Minus_AboveCutOff	0.00455695	0.00255246	0.07421	0.186137
SOK2_differenceOfMax_Minus_AboveCutOff	-0.00149385	0.00301666	0.620459	0.520686
SPT23_differenceOfMax_Minus_AboveCutOff	-0.000743752	0.00286982	0.795509	0.573092
SPT2_differenceOfMax_Minus_AboveCutOff	0.000327404	0.00286816	0.909118	0.604628
STB1_differenceOfMax_Minus_AboveCutOff	-0.0026661	0.00290681	0.359042	0.422835
STB5_differenceOfMax_Minus_AboveCutOff	0.00847175	0.00232987	0.000276749	0.00346576
SUT1_differenceOfMax_Minus_AboveCutOff	-0.000332565	0.00272687	0.902932	0.603704
THO2_differenceOfMax_Minus_AboveCutOff	0.00323377	0.00293894	0.271193	0.385631
UME1_differenceOfMax_Minus_AboveCutOff	NA	NA	NA	NA
ZAP1_differenceOfMax_Minus_AboveCutOff	NA	NA	NA	NA
ABF1_differenceOfMax_Minus_AboveCutOff	0.00546866	0.00232938	0.0188905	0.0815607
ACE2_differenceOfMax_Minus_AboveCutOff	0.00330583	0.00264064	0.210605	0.341371
ARG81_differenceOfMax_Minus_AboveCutOff	0.0111123	0.00272869	4.65293e-05	0.000801413
ASH1_differenceOfMax_Minus_AboveCutOff	0.000165427	0.00266378	0.950481	0.613911
AZF1_differenceOfMax_Minus_AboveCutOff	NA	NA	NA	NA
CBF1_differenceOfMax_Minus_AboveCutOff	0.00336945	0.00273695	0.218288	0.342572
GAL4_differenceOfMax_Minus_AboveCutOff	NA	NA	NA	NA
GAT3_differenceOfMax_Minus_AboveCutOff	-0.00358975	0.00293505	0.221305	0.344173
GCR2_differenceOfMax_Minus_AboveCutOff	-0.00151896	0.0033624	0.651449	0.526226
GTS1_differenceOfMax_Minus_AboveCutOff	0.000399709	0.00262387	0.878922	0.595483
HAC1_differenceOfMax_Minus_AboveCutOff	NA	NA	NA	NA
HAP2_differenceOfMax_Minus_AboveCutOff	0.0136014	0.00248385	4.35225e-08	1.26729e-06
IME1_differenceOfMax_Minus_AboveCutOff	-0.000717963	0.00326539	0.825972	0.580604
IXR1_differenceOfMax_Minus_AboveCutOff	NA	NA	NA	NA
JHD1_differenceOfMax_Minus_AboveCutOff	-0.00410504	0.00433261	0.343397	0.417778
MATA1_differenceOfMax_Minus_AboveCutOff	0.000667526	0.00276705	0.809368	0.576426
MET32_differenceOfMax_Minus_AboveCutOff	NA	NA	NA	NA
MOT3_differenceOfMax_Minus_AboveCutOff	0.00713255	0.00295029	0.0156242	0.0728895
PDR1_differenceOfMax_Minus_AboveCutOff	-0.0010501	0.00233081	0.652327	0.526226
RFX1_differenceOfMax_Minus_AboveCutOff	NA	NA	NA	NA
RGT1_differenceOfMax_Minus_AboveCutOff	NA	NA	NA	NA
RME1_differenceOfMax_Minus_AboveCutOff	0.00224381	0.00312342	0.472522	0.478543
RTG3_differenceOfMax_Minus_AboveCutOff	0.00111968	0.00331171	0.73529	0.554923
SKO1_differenceOfMax_Minus_AboveCutOff	NA	NA	NA	NA
SNF1_differenceOfMax_Minus_AboveCutOff	NA	NA	NA	NA
SNT2_differenceOfMax_Minus_AboveCutOff	NA	NA	NA	NA
STB2_differenceOfMax_Minus_AboveCutOff	0.00429159	0.00314088	0.171824	0.303063
STP1_differenceOfMax_Minus_AboveCutOff	0.00440948	0.00477632	0.355904	0.421967
SWI4_differenceOfMax_Minus_AboveCutOff	0.00228993	0.00313611	0.465279	0.476102
SWI6_differenceOfMax_Minus_AboveCutOff	0.000967536	0.00259824	0.709609	0.548746
THI2_differenceOfMax_Minus_AboveCutOff	0.0207137	0.0135195	0.125489	0.256338
URC2_differenceOfMax_Minus_AboveCutOff	NA	NA	NA	NA
YHP1_differenceOfMax_Minus_AboveCutOff	-0.00111998	0.00277891	0.686928	0.541218
YRR1_differenceOfMax_Minus_AboveCutOff	NA	NA	NA	NA
ARG80_differenceOfMax_Minus_AboveCutOff	-0.00149214	0.00328571	0.649734	0.526226
ARO80_differenceOfMax_Minus_AboveCutOff	NA	NA	NA	NA
ARR1_differenceOfMax_Minus_AboveCutOff	0.0115204	0.00290256	7.21669e-05	0.00114545
CHA4_differenceOfMax_Minus_AboveCutOff	-0.0010135	0.00233105	0.663722	0.532007
CUP9_differenceOfMax_Minus_AboveCutOff	NA	NA	NA	NA
HMS1_differenceOfMax_Minus_AboveCutOff	0.00325049	0.00278316	0.242841	0.36395
INO2_differenceOfMax_Minus_AboveCutOff	-0.00243384	0.00439098	0.579386	0.51384
MCM1_differenceOfMax_Minus_AboveCutOff	-0.00128254	0.00233201	0.582337	0.51393
MET28_differenceOfMax_Minus_AboveCutOff	0.01351	0.00298744	6.1182e-06	0.000117912
MGA1_differenceOfMax_Minus_AboveCutOff	0.000562684	0.00288839	0.845543	0.583801
PDR3_differenceOfMax_Minus_AboveCutOff	0.00218974	0.0030638	0.474786	0.478543
PHO4_differenceOfMax_Minus_AboveCutOff	NA	NA	NA	NA
PUT3_differenceOfMax_Minus_AboveCutOff	NA	NA	NA	NA
RAP1_differenceOfMax_Minus_AboveCutOff	0.00144037	0.0023322	0.536837	0.502645
SMP1_differenceOfMax_Minus_AboveCutOff	0.0200692	0.00279866	7.44427e-13	4.58072e-11
UGA3_differenceOfMax_Minus_AboveCutOff	-0.00313202	0.00403867	0.43804	0.465159
YAP3_differenceOfMax_Minus_AboveCutOff	0.00152586	0.00288464	0.596833	0.514248
YAP5_differenceOfMax_Minus_AboveCutOff	-0.00087766	0.00233083	0.706512	0.548746
CUP2_differenceOfMax_Minus_AboveCutOff	NA	NA	NA	NA
GAL80_differenceOfMax_Minus_AboveCutOff	NA	NA	NA	NA
HAP5_differenceOfMax_Minus_AboveCutOff	-0.00204107	0.00233095	0.381226	0.438167
HSF1_differenceOfMax_Minus_AboveCutOff	0.0021322	0.00233123	0.360389	0.423229
INO4_differenceOfMax_Minus_AboveCutOff	-0.00119745	0.00233129	0.607502	0.51711
MATALPHA2_differenceOfMax_Minus_AboveCutOff	0.0076284	0.00420215	0.0694688	0.178102
ORC1_differenceOfMax_Minus_AboveCutOff	-0.0014802	0.00267971	0.580694	0.51393
SPT15_differenceOfMax_Minus_AboveCutOff	0.000774112	0.00268416	0.77304	0.566968
STB4_differenceOfMax_Minus_AboveCutOff	NA	NA	NA	NA
SUM1_differenceOfMax_Minus_AboveCutOff	0.0146319	0.00274326	9.61965e-08	2.60895e-06
UME6_differenceOfMax_Minus_AboveCutOff	0.0236458	0.00230252	9.67024e-25	2.75922e-22
YAP1_differenceOfMax_Minus_AboveCutOff	NA	NA	NA	NA
YDR026C_differenceOfMax_Minus_AboveCutOff	-0.0018387	0.00339014	0.587566	0.514248
BAS1_differenceOfMax_Minus_AboveCutOff	-0.000295235	0.00269779	0.912857	0.604628
CAD1_differenceOfMax_Minus_AboveCutOff	-0.00116273	0.0023315	0.617988	0.52001
CIN5_differenceOfMax_Minus_AboveCutOff	-0.0039017	0.00366315	0.286822	0.394482
CRZ1_differenceOfMax_Minus_AboveCutOff	0.00272586	0.00271663	0.315669	0.403415
ERT1_differenceOfMax_Minus_AboveCutOff	-0.00115573	0.00335259	0.730298	0.553885
GCN4_differenceOfMax_Minus_AboveCutOff	0.00560455	0.00283483	0.0480381	0.142015
GCR1_differenceOfMax_Minus_AboveCutOff	-0.00173324	0.00233098	0.457139	0.471039
HAP1_differenceOfMax_Minus_AboveCutOff	0.00900569	0.00298126	0.00252137	0.0193363
HAP3_differenceOfMax_Minus_AboveCutOff	NA	NA	NA	NA
LEU3_differenceOfMax_Minus_AboveCutOff	NA	NA	NA	NA
MAC1_differenceOfMax_Minus_AboveCutOff	-0.00249413	0.0036349	0.492612	0.483534
MBP1_differenceOfMax_Minus_AboveCutOff	0.00914623	0.00269204	0.000680021	0.00747917
MET31_differenceOfMax_Minus_AboveCutOff	NA	NA	NA	NA
NRG1_differenceOfMax_Minus_AboveCutOff	-0.00184867	0.00258898	0.475193	0.478543
PHD1_differenceOfMax_Minus_AboveCutOff	-0.00315391	0.0029157	0.279385	0.391562
RLM1_differenceOfMax_Minus_AboveCutOff	0.0229069	0.00315816	4.06877e-13	2.60618e-11
RPH1_differenceOfMax_Minus_AboveCutOff	0.00159612	0.00279585	0.568076	0.51022
RPN4_differenceOfMax_Minus_AboveCutOff	-0.000641926	0.00233114	0.783032	0.568899
SIP4_differenceOfMax_Minus_AboveCutOff	NA	NA	NA	NA
TEC1_differenceOfMax_Minus_AboveCutOff	-0.00215184	0.00337233	0.523417	0.495319
TYE7_differenceOfMax_Minus_AboveCutOff	0.00569789	0.00292627	0.0515169	0.149038
YAP6_differenceOfMax_Minus_AboveCutOff	0.00691981	0.00336104	0.0395103	0.126108
YAP7_differenceOfMax_Minus_AboveCutOff	0.00927436	0.00326014	0.00444438	0.0304679
RDS2_differenceOfMax_Minus_AboveCutOff	0.00354204	0.00284225	0.212687	0.341371
YGR067C_differenceOfMax_Minus_AboveCutOff	0.00555202	0.00272225	0.0414008	0.129028
YML081W_differenceOfMax_Minus_AboveCutOff	0.000517059	0.00288545	0.857784	0.587954
ASG1_differenceOfMax_Minus_AboveCutOff	0.000893558	0.00233175	0.701562	0.548746
CEP3_differenceOfMax_Minus_AboveCutOff	NA	NA	NA	NA
DOT6_differenceOfMax_Minus_AboveCutOff	8.44191e-05	0.00340017	0.980192	0.622453
ECM22_differenceOfMax_Minus_AboveCutOff	-0.00225885	0.00287216	0.431594	0.463241
FHL1_differenceOfMax_Minus_AboveCutOff	0.000624223	0.00301573	0.836019	0.583379
GAT1_differenceOfMax_Minus_AboveCutOff	0.00867843	0.00283287	0.0021878	0.0177854
GAT4_differenceOfMax_Minus_AboveCutOff	-0.00180175	0.00334284	0.589896	0.514248
HAL9_differenceOfMax_Minus_AboveCutOff	0.0190192	0.00301582	2.85463e-10	1.00201e-08
LYS14_differenceOfMax_Minus_AboveCutOff	NA	NA	NA	NA
MIG2_differenceOfMax_Minus_AboveCutOff	0.00372569	0.0030182	0.217051	0.342572
MIG3_differenceOfMax_Minus_AboveCutOff	-0.00105411	0.00233144	0.651176	0.526226
NDT80_differenceOfMax_Minus_AboveCutOff	NA	NA	NA	NA
NHP6A_differenceOfMax_Minus_AboveCutOff	0.000878174	0.0038315	0.818715	0.57776
NHP6B_differenceOfMax_Minus_AboveCutOff	0.00118773	0.00308103	0.699868	0.548485
OAF1_differenceOfMax_Minus_AboveCutOff	0.00794121	0.00457429	0.0825542	0.197404
PHO2_differenceOfMax_Minus_AboveCutOff	0.00176898	0.00317163	0.577015	0.51384
RDR1_differenceOfMax_Minus_AboveCutOff	NA	NA	NA	NA
RDS1_differenceOfMax_Minus_AboveCutOff	NA	NA	NA	NA
SFL1_differenceOfMax_Minus_AboveCutOff	-0.00258098	0.00268142	0.335777	0.417778
SFP1_differenceOfMax_Minus_AboveCutOff	0.00431568	0.002666	0.105494	0.229323
SRD1_differenceOfMax_Minus_AboveCutOff	NA	NA	NA	NA
STB3_differenceOfMax_Minus_AboveCutOff	0.000816448	0.00233085	0.72613	0.552013
STP2_differenceOfMax_Minus_AboveCutOff	0.015065	0.00404857	0.00019838	0.00279029
SUT2_differenceOfMax_Minus_AboveCutOff	-0.00244677	0.00413265	0.553812	0.504667
TBF1_differenceOfMax_Minus_AboveCutOff	0.000152283	0.0041758	0.970909	0.620811
TBS1_differenceOfMax_Minus_AboveCutOff	-0.00125395	0.00233136	0.590672	0.514248
TEA1_differenceOfMax_Minus_AboveCutOff	NA	NA	NA	NA
TOD6_differenceOfMax_Minus_AboveCutOff	0.0125076	0.00344129	0.000278429	0.00346576
YKL222C_differenceOfMax_Minus_AboveCutOff	0.00123518	0.00364161	0.73447	0.554923
YLL054C_differenceOfMax_Minus_AboveCutOff	NA	NA	NA	NA
YPR013C_differenceOfMax_Minus_AboveCutOff	-0.000965832	0.00233744	0.679459	0.539786
YPR015C_differenceOfMax_Minus_AboveCutOff	NA	NA	NA	NA
YRM1_differenceOfMax_Minus_AboveCutOff	NA	NA	NA	NA
ABF2_differenceOfMeans_Minus_AboveCutOff	0.00153627	0.00325638	0.63709	0.526226
CAT8_differenceOfMeans_Minus_AboveCutOff	-0.00308732	0.00356215	0.386105	0.439095
CST6_differenceOfMeans_Minus_AboveCutOff	0.00399625	0.00320304	0.212162	0.341371
ECM23_differenceOfMeans_Minus_AboveCutOff	-0.00300329	0.00295789	0.30994	0.403415
EDS1_differenceOfMeans_Minus_AboveCutOff	NA	NA	NA	NA
FKH2_differenceOfMeans_Minus_AboveCutOff	-0.000877956	0.00276077	0.750476	0.560174
FZF1_differenceOfMeans_Minus_AboveCutOff	-0.00101085	0.00285452	0.723246	0.552013
GIS1_differenceOfMeans_Minus_AboveCutOff	0.00290497	0.00322995	0.368448	0.429239
GSM1_differenceOfMeans_Minus_AboveCutOff	0.0087774	0.00321304	0.0062988	0.0387558
GZF3_differenceOfMeans_Minus_AboveCutOff	0.00443443	0.00290168	0.126456	0.257143
HCM1_differenceOfMeans_Minus_AboveCutOff	0.00349349	0.00299159	0.2429	0.36395
HMRA2_differenceOfMeans_Minus_AboveCutOff	0.000954503	0.00261197	0.714787	0.549566
NHP10_differenceOfMeans_Minus_AboveCutOff	0.00249755	0.0024906	0.315962	0.403415
PDR8_differenceOfMeans_Minus_AboveCutOff	4.68228e-05	0.00288357	0.987045	0.623634
REB1_differenceOfMeans_Minus_AboveCutOff	-0.00204611	0.00290581	0.481342	0.478955
REI1_differenceOfMeans_Minus_AboveCutOff	NA	NA	NA	NA
RSC30_differenceOfMeans_Minus_AboveCutOff	0.00144972	0.00280436	0.605189	0.516517
RSC3_differenceOfMeans_Minus_AboveCutOff	0.00846694	0.0027149	0.00181656	0.0159651
RSF2_differenceOfMeans_Minus_AboveCutOff	0.0114643	0.00310972	0.000227265	0.00303785
STE12_differenceOfMeans_Minus_AboveCutOff	-0.00206676	0.0027896	0.458766	0.471593
STP3_differenceOfMeans_Minus_AboveCutOff	6.13366e-05	0.00259627	0.981152	0.622576
STP4_differenceOfMeans_Minus_AboveCutOff	0.000989153	0.00273283	0.717388	0.550783
SWI5_differenceOfMeans_Minus_AboveCutOff	0.00272873	0.0026721	0.307162	0.403415
TOS8_differenceOfMeans_Minus_AboveCutOff	-0.00130092	0.00284145	0.64707	0.526226
USV1_differenceOfMeans_Minus_AboveCutOff	0.00244208	0.00280638	0.384196	0.439095
YER130C_differenceOfMeans_Minus_AboveCutOff	-0.000419991	0.00316412	0.894403	0.600865
YER184C_differenceOfMeans_Minus_AboveCutOff	0.0115747	0.00311175	0.000199485	0.00279029
YLR278C_differenceOfMeans_Minus_AboveCutOff	0.00178616	0.00290931	0.539252	0.50286
YNR063W_differenceOfMeans_Minus_AboveCutOff	-0.000636407	0.00258624	0.805625	0.57578
YOX1_differenceOfMeans_Minus_AboveCutOff	0.00156401	0.00294236	0.595038	0.514248
YPR022C_differenceOfMeans_Minus_AboveCutOff	0.0034957	0.00280455	0.212603	0.341371
YPR196W_differenceOfMeans_Minus_AboveCutOff	0.00492848	0.00286454	0.0853391	0.200359
ACA1_differenceOfMeans_Minus_AboveCutOff	NA	NA	NA	NA
ADR1_differenceOfMeans_Minus_AboveCutOff	NA	NA	NA	NA
AFT1_differenceOfMeans_Minus_AboveCutOff	-0.000782959	0.00328503	0.811616	0.577267
DAL81_differenceOfMeans_Minus_AboveCutOff	0.00139247	0.00233113	0.550283	0.503954
DAL82_differenceOfMeans_Minus_AboveCutOff	NA	NA	NA	NA
DIG1_differenceOfMeans_Minus_AboveCutOff	NA	NA	NA	NA
FKH1_differenceOfMeans_Minus_AboveCutOff	0.000245481	0.00279657	0.930052	0.607924
MIG1_differenceOfMeans_Minus_AboveCutOff	NA	NA	NA	NA
OPI1_differenceOfMeans_Minus_AboveCutOff	-0.00224358	0.00293487	0.444596	0.467007
PIP2_differenceOfMeans_Minus_AboveCutOff	-0.00141021	0.00233133	0.545249	0.503935
PPR1_differenceOfMeans_Minus_AboveCutOff	NA	NA	NA	NA
RGM1_differenceOfMeans_Minus_AboveCutOff	-0.000696765	0.00233233	0.765136	0.563337
RTG1_differenceOfMeans_Minus_AboveCutOff	NA	NA	NA	NA
SKN7_differenceOfMeans_Minus_AboveCutOff	0.000578492	0.00233145	0.804037	0.575405
UPC2_differenceOfMeans_Minus_AboveCutOff	NA	NA	NA	NA
WAR1_differenceOfMeans_Minus_AboveCutOff	NA	NA	NA	NA
XBP1_differenceOfMeans_Minus_AboveCutOff	-0.00189785	0.0026841	0.479522	0.478567
AFT2_differenceOfMeans_Minus_AboveCutOff	-0.00301531	0.0026788	0.260326	0.375316
MATA2_differenceOfMeans_Minus_AboveCutOff	0.00370975	0.00268676	0.167356	0.300426
MSN1_differenceOfMeans_Minus_AboveCutOff	0.000831046	0.00255936	0.745401	0.557949
NRG2_differenceOfMeans_Minus_AboveCutOff	0.00281882	0.00280866	0.315564	0.403415
ROX1_differenceOfMeans_Minus_AboveCutOff	0.00745979	0.00292346	0.0107197	0.0559715
DAL80_differenceOfMeans_Minus_AboveCutOff	0.00158131	0.00298789	0.596639	0.514248
GLN3_differenceOfMeans_Minus_AboveCutOff	0.0030125	0.0028158	0.284685	0.394001
HAP4_differenceOfMeans_Minus_AboveCutOff	-0.00213623	0.00333867	0.522274	0.495319
MET4_differenceOfMeans_Minus_AboveCutOff	-0.00134707	0.00233359	0.56377	0.508886
MOT2_differenceOfMeans_Minus_AboveCutOff	-0.0033144	0.00347501	0.340195	0.417778
MSN2_differenceOfMeans_Minus_AboveCutOff	-0.00178981	0.00368061	0.626767	0.523814
MSN4_differenceOfMeans_Minus_AboveCutOff	0.00363752	0.00265357	0.170437	0.301924
NDD1_differenceOfMeans_Minus_AboveCutOff	-0.00311074	0.00389483	0.424474	0.460469
RIM101_differenceOfMeans_Minus_AboveCutOff	0.00455695	0.00255246	0.07421	0.186137
SOK2_differenceOfMeans_Minus_AboveCutOff	-0.00149385	0.00301666	0.620459	0.520686
SPT23_differenceOfMeans_Minus_AboveCutOff	-0.000743752	0.00286982	0.795509	0.573092
SPT2_differenceOfMeans_Minus_AboveCutOff	0.000327404	0.00286816	0.909118	0.604628
STB1_differenceOfMeans_Minus_AboveCutOff	-0.0026661	0.00290681	0.359042	0.422835
STB5_differenceOfMeans_Minus_AboveCutOff	0.00847175	0.00232987	0.000276749	0.00346576
SUT1_differenceOfMeans_Minus_AboveCutOff	-0.000332565	0.00272687	0.902932	0.603704
THO2_differenceOfMeans_Minus_AboveCutOff	0.00323377	0.00293894	0.271193	0.385631
UME1_differenceOfMeans_Minus_AboveCutOff	NA	NA	NA	NA
ZAP1_differenceOfMeans_Minus_AboveCutOff	NA	NA	NA	NA
ABF1_differenceOfMeans_Minus_AboveCutOff	0.00546866	0.00232938	0.0188905	0.0815607
ACE2_differenceOfMeans_Minus_AboveCutOff	0.00330583	0.00264064	0.210605	0.341371
ARG81_differenceOfMeans_Minus_AboveCutOff	0.0111123	0.00272869	4.65293e-05	0.000801413
ASH1_differenceOfMeans_Minus_AboveCutOff	-3.30782e-05	0.00266623	0.990101	0.623965
AZF1_differenceOfMeans_Minus_AboveCutOff	NA	NA	NA	NA
CBF1_differenceOfMeans_Minus_AboveCutOff	0.00336945	0.00273695	0.218288	0.342572
GAL4_differenceOfMeans_Minus_AboveCutOff	NA	NA	NA	NA
GAT3_differenceOfMeans_Minus_AboveCutOff	-0.00358975	0.00293505	0.221305	0.344173
GCR2_differenceOfMeans_Minus_AboveCutOff	-0.00151896	0.0033624	0.651449	0.526226
GTS1_differenceOfMeans_Minus_AboveCutOff	0.000399709	0.00262387	0.878922	0.595483
HAC1_differenceOfMeans_Minus_AboveCutOff	NA	NA	NA	NA
HAP2_differenceOfMeans_Minus_AboveCutOff	0.0136014	0.00248385	4.35225e-08	1.26729e-06
IME1_differenceOfMeans_Minus_AboveCutOff	-0.000717963	0.00326539	0.825972	0.580604
IXR1_differenceOfMeans_Minus_AboveCutOff	NA	NA	NA	NA
JHD1_differenceOfMeans_Minus_AboveCutOff	-0.00410504	0.00433261	0.343397	0.417778
MATA1_differenceOfMeans_Minus_AboveCutOff	0.000667526	0.00276705	0.809368	0.576426
MET32_differenceOfMeans_Minus_AboveCutOff	NA	NA	NA	NA
MOT3_differenceOfMeans_Minus_AboveCutOff	0.00713255	0.00295029	0.0156242	0.0728895
PDR1_differenceOfMeans_Minus_AboveCutOff	-0.0010501	0.00233081	0.652327	0.526226
RFX1_differenceOfMeans_Minus_AboveCutOff	NA	NA	NA	NA
RGT1_differenceOfMeans_Minus_AboveCutOff	NA	NA	NA	NA
RME1_differenceOfMeans_Minus_AboveCutOff	0.00224381	0.00312342	0.472522	0.478543
RTG3_differenceOfMeans_Minus_AboveCutOff	0.00111968	0.00331171	0.73529	0.554923
SKO1_differenceOfMeans_Minus_AboveCutOff	NA	NA	NA	NA
SNF1_differenceOfMeans_Minus_AboveCutOff	NA	NA	NA	NA
SNT2_differenceOfMeans_Minus_AboveCutOff	NA	NA	NA	NA
STB2_differenceOfMeans_Minus_AboveCutOff	0.00429159	0.00314088	0.171824	0.303063
STP1_differenceOfMeans_Minus_AboveCutOff	0.00440948	0.00477632	0.355904	0.421967
SWI4_differenceOfMeans_Minus_AboveCutOff	0.00228993	0.00313611	0.465279	0.476102
SWI6_differenceOfMeans_Minus_AboveCutOff	0.000967536	0.00259824	0.709609	0.548746
THI2_differenceOfMeans_Minus_AboveCutOff	0.0207137	0.0135195	0.125489	0.256338
URC2_differenceOfMeans_Minus_AboveCutOff	NA	NA	NA	NA
YHP1_differenceOfMeans_Minus_AboveCutOff	-0.00111998	0.00277891	0.686928	0.541218
YRR1_differenceOfMeans_Minus_AboveCutOff	NA	NA	NA	NA
ARG80_differenceOfMeans_Minus_AboveCutOff	-0.00149214	0.00328571	0.649734	0.526226
ARO80_differenceOfMeans_Minus_AboveCutOff	NA	NA	NA	NA
ARR1_differenceOfMeans_Minus_AboveCutOff	0.0115204	0.00290256	7.21669e-05	0.00114545
CHA4_differenceOfMeans_Minus_AboveCutOff	-0.0010135	0.00233105	0.663722	0.532007
CUP9_differenceOfMeans_Minus_AboveCutOff	NA	NA	NA	NA
HMS1_differenceOfMeans_Minus_AboveCutOff	0.00340246	0.00278112	0.221175	0.344173
INO2_differenceOfMeans_Minus_AboveCutOff	-0.00243384	0.00439098	0.579386	0.51384
MCM1_differenceOfMeans_Minus_AboveCutOff	-0.00128254	0.00233201	0.582337	0.51393
MET28_differenceOfMeans_Minus_AboveCutOff	0.01351	0.00298744	6.1182e-06	0.000117912
MGA1_differenceOfMeans_Minus_AboveCutOff	0.000562684	0.00288839	0.845543	0.583801
PDR3_differenceOfMeans_Minus_AboveCutOff	0.00218974	0.0030638	0.474786	0.478543
PHO4_differenceOfMeans_Minus_AboveCutOff	NA	NA	NA	NA
PUT3_differenceOfMeans_Minus_AboveCutOff	NA	NA	NA	NA
RAP1_differenceOfMeans_Minus_AboveCutOff	0.00144037	0.0023322	0.536837	0.502645
SMP1_differenceOfMeans_Minus_AboveCutOff	0.0200552	0.00279945	7.83756e-13	4.66913e-11
UGA3_differenceOfMeans_Minus_AboveCutOff	-0.00313202	0.00403867	0.43804	0.465159
YAP3_differenceOfMeans_Minus_AboveCutOff	0.00152586	0.00288464	0.596833	0.514248
YAP5_differenceOfMeans_Minus_AboveCutOff	-0.00087766	0.00233083	0.706512	0.548746
CUP2_differenceOfMeans_Minus_AboveCutOff	NA	NA	NA	NA
GAL80_differenceOfMeans_Minus_AboveCutOff	NA	NA	NA	NA
HAP5_differenceOfMeans_Minus_AboveCutOff	-0.00204107	0.00233095	0.381226	0.438167
HSF1_differenceOfMeans_Minus_AboveCutOff	0.0021322	0.00233123	0.360389	0.423229
INO4_differenceOfMeans_Minus_AboveCutOff	-0.00119745	0.00233129	0.607502	0.51711
MATALPHA2_differenceOfMeans_Minus_AboveCutOff	0.0076284	0.00420215	0.0694688	0.178102
ORC1_differenceOfMeans_Minus_AboveCutOff	-0.0014802	0.00267971	0.580694	0.51393
SPT15_differenceOfMeans_Minus_AboveCutOff	0.000790465	0.00268415	0.76838	0.56457
STB4_differenceOfMeans_Minus_AboveCutOff	NA	NA	NA	NA
SUM1_differenceOfMeans_Minus_AboveCutOff	0.0146319	0.00274326	9.61965e-08	2.60895e-06
UME6_differenceOfMeans_Minus_AboveCutOff	0.0236458	0.00230252	9.67024e-25	2.75922e-22
YAP1_differenceOfMeans_Minus_AboveCutOff	NA	NA	NA	NA
YDR026C_differenceOfMeans_Minus_AboveCutOff	-0.0018387	0.00339014	0.587566	0.514248
BAS1_differenceOfMeans_Minus_AboveCutOff	-0.000295235	0.00269779	0.912857	0.604628
CAD1_differenceOfMeans_Minus_AboveCutOff	-0.00116273	0.0023315	0.617988	0.52001
CIN5_differenceOfMeans_Minus_AboveCutOff	-0.0039017	0.00366315	0.286822	0.394482
CRZ1_differenceOfMeans_Minus_AboveCutOff	0.00272586	0.00271663	0.315669	0.403415
ERT1_differenceOfMeans_Minus_AboveCutOff	-0.00115573	0.00335259	0.730298	0.553885
GCN4_differenceOfMeans_Minus_AboveCutOff	0.00560455	0.00283483	0.0480381	0.142015
GCR1_differenceOfMeans_Minus_AboveCutOff	-0.00173324	0.00233098	0.457139	0.471039
HAP1_differenceOfMeans_Minus_AboveCutOff	0.00900569	0.00298126	0.00252137	0.0193363
HAP3_differenceOfMeans_Minus_AboveCutOff	NA	NA	NA	NA
LEU3_differenceOfMeans_Minus_AboveCutOff	NA	NA	NA	NA
MAC1_differenceOfMeans_Minus_AboveCutOff	-0.00249413	0.0036349	0.492612	0.483534
MBP1_differenceOfMeans_Minus_AboveCutOff	0.00914623	0.00269204	0.000680021	0.00747917
MET31_differenceOfMeans_Minus_AboveCutOff	NA	NA	NA	NA
NRG1_differenceOfMeans_Minus_AboveCutOff	-0.00184867	0.00258898	0.475193	0.478543
PHD1_differenceOfMeans_Minus_AboveCutOff	-0.00315391	0.0029157	0.279385	0.391562
RLM1_differenceOfMeans_Minus_AboveCutOff	0.0229069	0.00315816	4.06877e-13	2.60618e-11
RPH1_differenceOfMeans_Minus_AboveCutOff	0.00159612	0.00279585	0.568076	0.51022
RPN4_differenceOfMeans_Minus_AboveCutOff	-0.000641926	0.00233114	0.783032	0.568899
SIP4_differenceOfMeans_Minus_AboveCutOff	NA	NA	NA	NA
TEC1_differenceOfMeans_Minus_AboveCutOff	-0.00215184	0.00337233	0.523417	0.495319
TYE7_differenceOfMeans_Minus_AboveCutOff	0.00569789	0.00292627	0.0515169	0.149038
YAP6_differenceOfMeans_Minus_AboveCutOff	0.00691981	0.00336104	0.0395103	0.126108
YAP7_differenceOfMeans_Minus_AboveCutOff	0.00927436	0.00326014	0.00444438	0.0304679
RDS2_differenceOfMeans_Minus_AboveCutOff	0.00354204	0.00284225	0.212687	0.341371
YGR067C_differenceOfMeans_Minus_AboveCutOff	0.00559194	0.00272791	0.0403738	0.127739
YML081W_differenceOfMeans_Minus_AboveCutOff	0.000591077	0.00288631	0.837739	0.583446
ASG1_differenceOfMeans_Minus_AboveCutOff	0.000893558	0.00233175	0.701562	0.548746
CEP3_differenceOfMeans_Minus_AboveCutOff	NA	NA	NA	NA
DOT6_differenceOfMeans_Minus_AboveCutOff	8.44191e-05	0.00340017	0.980192	0.622453
ECM22_differenceOfMeans_Minus_AboveCutOff	-0.00225885	0.00287216	0.431594	0.463241
FHL1_differenceOfMeans_Minus_AboveCutOff	0.000624223	0.00301573	0.836019	0.583379
GAT1_differenceOfMeans_Minus_AboveCutOff	0.00867843	0.00283287	0.0021878	0.0177854
GAT4_differenceOfMeans_Minus_AboveCutOff	-0.00180175	0.00334284	0.589896	0.514248
HAL9_differenceOfMeans_Minus_AboveCutOff	0.0190192	0.00301582	2.85463e-10	1.00201e-08
LYS14_differenceOfMeans_Minus_AboveCutOff	NA	NA	NA	NA
MIG2_differenceOfMeans_Minus_AboveCutOff	0.00372569	0.0030182	0.217051	0.342572
MIG3_differenceOfMeans_Minus_AboveCutOff	-0.00105411	0.00233144	0.651176	0.526226
NDT80_differenceOfMeans_Minus_AboveCutOff	NA	NA	NA	NA
NHP6A_differenceOfMeans_Minus_AboveCutOff	0.000876093	0.00382242	0.818715	0.57776
NHP6B_differenceOfMeans_Minus_AboveCutOff	0.00118773	0.00308103	0.699868	0.548485
OAF1_differenceOfMeans_Minus_AboveCutOff	0.00794121	0.00457429	0.0825542	0.197404
PHO2_differenceOfMeans_Minus_AboveCutOff	0.00176898	0.00317163	0.577015	0.51384
RDR1_differenceOfMeans_Minus_AboveCutOff	NA	NA	NA	NA
RDS1_differenceOfMeans_Minus_AboveCutOff	NA	NA	NA	NA
SFL1_differenceOfMeans_Minus_AboveCutOff	-0.00258098	0.00268142	0.335777	0.417778
SFP1_differenceOfMeans_Minus_AboveCutOff	0.00429175	0.00266876	0.107804	0.231551
SRD1_differenceOfMeans_Minus_AboveCutOff	NA	NA	NA	NA
STB3_differenceOfMeans_Minus_AboveCutOff	0.000816448	0.00233085	0.72613	0.552013
STP2_differenceOfMeans_Minus_AboveCutOff	0.015065	0.00404857	0.00019838	0.00279029
SUT2_differenceOfMeans_Minus_AboveCutOff	-0.00244677	0.00413265	0.553812	0.504667
TBF1_differenceOfMeans_Minus_AboveCutOff	0.000152283	0.0041758	0.970909	0.620811
TBS1_differenceOfMeans_Minus_AboveCutOff	-0.00125395	0.00233136	0.590672	0.514248
TEA1_differenceOfMeans_Minus_AboveCutOff	NA	NA	NA	NA
TOD6_differenceOfMeans_Minus_AboveCutOff	0.0125076	0.00344129	0.000278429	0.00346576
YKL222C_differenceOfMeans_Minus_AboveCutOff	0.00123518	0.00364161	0.73447	0.554923
YLL054C_differenceOfMeans_Minus_AboveCutOff	NA	NA	NA	NA
YPR013C_differenceOfMeans_Minus_AboveCutOff	-0.000965832	0.00233744	0.679459	0.539786
YPR015C_differenceOfMeans_Minus_AboveCutOff	NA	NA	NA	NA
YRM1_differenceOfMeans_Minus_AboveCutOff	NA	NA	NA	NA
ABF2_deltaSignificantBindingSites_Minus_AboveCutOff	0.0021911	0.0031547	0.487337	0.482848
CAT8_deltaSignificantBindingSites_Minus_AboveCutOff	-0.00325416	0.00356137	0.360854	0.423229
CST6_deltaSignificantBindingSites_Minus_AboveCutOff	0.00379165	0.00329292	0.249546	0.368131
ECM23_deltaSignificantBindingSites_Minus_AboveCutOff	-0.0032874	0.00295203	0.265448	0.380185
EDS1_deltaSignificantBindingSites_Minus_AboveCutOff	NA	NA	NA	NA
FKH2_deltaSignificantBindingSites_Minus_AboveCutOff	-0.000877956	0.00276077	0.750476	0.560174
FZF1_deltaSignificantBindingSites_Minus_AboveCutOff	-0.00101085	0.00285452	0.723246	0.552013
GIS1_deltaSignificantBindingSites_Minus_AboveCutOff	0.00295491	0.0031902	0.354317	0.421938
GSM1_deltaSignificantBindingSites_Minus_AboveCutOff	0.00695974	0.00322624	0.0309879	0.110545
GZF3_deltaSignificantBindingSites_Minus_AboveCutOff	0.0031213	0.00283121	0.270261	0.385377
HCM1_deltaSignificantBindingSites_Minus_AboveCutOff	0.00279407	0.00295954	0.345123	0.417778
HMRA2_deltaSignificantBindingSites_Minus_AboveCutOff	0.000944258	0.00262422	0.718978	0.551222
NHP10_deltaSignificantBindingSites_Minus_AboveCutOff	0.00261922	0.00249482	0.293781	0.397305
PDR8_deltaSignificantBindingSites_Minus_AboveCutOff	-0.000421317	0.00287078	0.883321	0.596889
REB1_deltaSignificantBindingSites_Minus_AboveCutOff	-0.00200479	0.00285554	0.482635	0.479352
REI1_deltaSignificantBindingSites_Minus_AboveCutOff	NA	NA	NA	NA
RSC30_deltaSignificantBindingSites_Minus_AboveCutOff	0.00144972	0.00280436	0.605189	0.516517
RSC3_deltaSignificantBindingSites_Minus_AboveCutOff	0.0110174	0.00291666	0.000158462	0.00232897
RSF2_deltaSignificantBindingSites_Minus_AboveCutOff	0.011562	0.00315154	0.00024379	0.00323174
STE12_deltaSignificantBindingSites_Minus_AboveCutOff	-0.00201735	0.00285439	0.47972	0.478567
STP3_deltaSignificantBindingSites_Minus_AboveCutOff	0.000320879	0.00257835	0.900958	0.603584
STP4_deltaSignificantBindingSites_Minus_AboveCutOff	0.00155163	0.0026628	0.560092	0.508886
SWI5_deltaSignificantBindingSites_Minus_AboveCutOff	0.00237553	0.00273354	0.38483	0.439095
TOS8_deltaSignificantBindingSites_Minus_AboveCutOff	-0.001512	0.00286242	0.597345	0.514248
USV1_deltaSignificantBindingSites_Minus_AboveCutOff	0.0026798	0.00278336	0.33565	0.417778
YER130C_deltaSignificantBindingSites_Minus_AboveCutOff	-0.000366664	0.00329528	0.911403	0.604628
YER184C_deltaSignificantBindingSites_Minus_AboveCutOff	0.0154386	0.0030949	6.08785e-07	1.4085e-05
YLR278C_deltaSignificantBindingSites_Minus_AboveCutOff	0.000642017	0.00296619	0.828641	0.580977
YNR063W_deltaSignificantBindingSites_Minus_AboveCutOff	-0.000491252	0.00249257	0.84376	0.583801
YOX1_deltaSignificantBindingSites_Minus_AboveCutOff	0.000887058	0.00291612	0.760982	0.563232
YPR022C_deltaSignificantBindingSites_Minus_AboveCutOff	0.00316509	0.00280175	0.258609	0.375023
YPR196W_deltaSignificantBindingSites_Minus_AboveCutOff	0.00432537	0.00285462	0.129717	0.260832
ACA1_deltaSignificantBindingSites_Minus_AboveCutOff	NA	NA	NA	NA
ADR1_deltaSignificantBindingSites_Minus_AboveCutOff	NA	NA	NA	NA
AFT1_deltaSignificantBindingSites_Minus_AboveCutOff	-0.000785601	0.00329611	0.811616	0.577267
DAL81_deltaSignificantBindingSites_Minus_AboveCutOff	0.00139247	0.00233113	0.550283	0.503954
DAL82_deltaSignificantBindingSites_Minus_AboveCutOff	NA	NA	NA	NA
DIG1_deltaSignificantBindingSites_Minus_AboveCutOff	NA	NA	NA	NA
FKH1_deltaSignificantBindingSites_Minus_AboveCutOff	0.000254357	0.00280278	0.92769	0.607924
MIG1_deltaSignificantBindingSites_Minus_AboveCutOff	NA	NA	NA	NA
OPI1_deltaSignificantBindingSites_Minus_AboveCutOff	-0.00212581	0.00285459	0.456453	0.471039
PIP2_deltaSignificantBindingSites_Minus_AboveCutOff	-0.00141021	0.00233133	0.545249	0.503935
PPR1_deltaSignificantBindingSites_Minus_AboveCutOff	NA	NA	NA	NA
RGM1_deltaSignificantBindingSites_Minus_AboveCutOff	-0.000696765	0.00233233	0.765136	0.563337
RTG1_deltaSignificantBindingSites_Minus_AboveCutOff	NA	NA	NA	NA
SKN7_deltaSignificantBindingSites_Minus_AboveCutOff	0.000484718	0.00233149	0.835307	0.583379
UPC2_deltaSignificantBindingSites_Minus_AboveCutOff	NA	NA	NA	NA
WAR1_deltaSignificantBindingSites_Minus_AboveCutOff	NA	NA	NA	NA
XBP1_deltaSignificantBindingSites_Minus_AboveCutOff	-0.00174392	0.00260766	0.503645	0.489995
AFT2_deltaSignificantBindingSites_Minus_AboveCutOff	-0.00302066	0.00269162	0.261758	0.376229
MATA2_deltaSignificantBindingSites_Minus_AboveCutOff	0.00372011	0.00268877	0.166489	0.300426
MSN1_deltaSignificantBindingSites_Minus_AboveCutOff	0.000624032	0.00255388	0.806963	0.575818
NRG2_deltaSignificantBindingSites_Minus_AboveCutOff	0.00291478	0.00278711	0.29565	0.39836
ROX1_deltaSignificantBindingSites_Minus_AboveCutOff	0.00701152	0.00291651	0.0162134	0.0735265
DAL80_deltaSignificantBindingSites_Minus_AboveCutOff	0.00158131	0.00298789	0.596639	0.514248
GLN3_deltaSignificantBindingSites_Minus_AboveCutOff	0.00291968	0.0028542	0.306336	0.403415
HAP4_deltaSignificantBindingSites_Minus_AboveCutOff	-0.00206722	0.00329644	0.530589	0.499486
MET4_deltaSignificantBindingSites_Minus_AboveCutOff	-0.00134707	0.00233359	0.56377	0.508886
MOT2_deltaSignificantBindingSites_Minus_AboveCutOff	-0.0033691	0.00355973	0.343921	0.417778
MSN2_deltaSignificantBindingSites_Minus_AboveCutOff	-0.0024536	0.00355984	0.490669	0.483534
MSN4_deltaSignificantBindingSites_Minus_AboveCutOff	0.00365294	0.0026312	0.165041	0.299562
NDD1_deltaSignificantBindingSites_Minus_AboveCutOff	-0.00304042	0.00368461	0.409277	0.451528
RIM101_deltaSignificantBindingSites_Minus_AboveCutOff	0.00455695	0.00255246	0.07421	0.186137
SOK2_deltaSignificantBindingSites_Minus_AboveCutOff	-0.00169323	0.00303903	0.577417	0.51384
SPT23_deltaSignificantBindingSites_Minus_AboveCutOff	-0.000976149	0.00292913	0.738941	0.557316
SPT2_deltaSignificantBindingSites_Minus_AboveCutOff	8.90265e-05	0.00278585	0.974507	0.620811
STB1_deltaSignificantBindingSites_Minus_AboveCutOff	-0.00254249	0.00275833	0.356658	0.422171
STB5_deltaSignificantBindingSites_Minus_AboveCutOff	0.00784867	0.00233047	0.000757566	0.00811183
SUT1_deltaSignificantBindingSites_Minus_AboveCutOff	-0.000377972	0.00275796	0.890993	0.59933
THO2_deltaSignificantBindingSites_Minus_AboveCutOff	0.00312784	0.00293286	0.286206	0.394482
UME1_deltaSignificantBindingSites_Minus_AboveCutOff	NA	NA	NA	NA
ZAP1_deltaSignificantBindingSites_Minus_AboveCutOff	NA	NA	NA	NA
ABF1_deltaSignificantBindingSites_Minus_AboveCutOff	0.00546866	0.00232938	0.0188905	0.0815607
ACE2_deltaSignificantBindingSites_Minus_AboveCutOff	0.00353558	0.00257797	0.170232	0.301924
ARG81_deltaSignificantBindingSites_Minus_AboveCutOff	0.00995483	0.00273364	0.00027095	0.00346576
ASH1_deltaSignificantBindingSites_Minus_AboveCutOff	0.00116411	0.0027336	0.670216	0.53638
AZF1_deltaSignificantBindingSites_Minus_AboveCutOff	NA	NA	NA	NA
CBF1_deltaSignificantBindingSites_Minus_AboveCutOff	0.00405706	0.00329549	0.218288	0.342572
GAL4_deltaSignificantBindingSites_Minus_AboveCutOff	NA	NA	NA	NA
GAT3_deltaSignificantBindingSites_Minus_AboveCutOff	-0.00343066	0.00292661	0.241104	0.362443
GCR2_deltaSignificantBindingSites_Minus_AboveCutOff	-0.00151896	0.0033624	0.651449	0.526226
GTS1_deltaSignificantBindingSites_Minus_AboveCutOff	0.000818763	0.00269198	0.761015	0.563232
HAC1_deltaSignificantBindingSites_Minus_AboveCutOff	NA	NA	NA	NA
HAP2_deltaSignificantBindingSites_Minus_AboveCutOff	0.0122205	0.002511	1.13425e-06	2.54516e-05
IME1_deltaSignificantBindingSites_Minus_AboveCutOff	-0.000724797	0.00329647	0.825972	0.580604
IXR1_deltaSignificantBindingSites_Minus_AboveCutOff	NA	NA	NA	NA
JHD1_deltaSignificantBindingSites_Minus_AboveCutOff	-0.00400882	0.00425394	0.345999	0.417778
MATA1_deltaSignificantBindingSites_Minus_AboveCutOff	0.000628619	0.00275823	0.819719	0.578017
MET32_deltaSignificantBindingSites_Minus_AboveCutOff	NA	NA	NA	NA
MOT3_deltaSignificantBindingSites_Minus_AboveCutOff	0.00703205	0.00303684	0.0205812	0.0872306
PDR1_deltaSignificantBindingSites_Minus_AboveCutOff	NA	NA	NA	NA
RFX1_deltaSignificantBindingSites_Minus_AboveCutOff	NA	NA	NA	NA
RGT1_deltaSignificantBindingSites_Minus_AboveCutOff	NA	NA	NA	NA
RME1_deltaSignificantBindingSites_Minus_AboveCutOff	0.00231939	0.00323191	0.47297	0.478543
RTG3_deltaSignificantBindingSites_Minus_AboveCutOff	0.00117477	0.0032966	0.721573	0.552013
SKO1_deltaSignificantBindingSites_Minus_AboveCutOff	NA	NA	NA	NA
SNF1_deltaSignificantBindingSites_Minus_AboveCutOff	NA	NA	NA	NA
SNT2_deltaSignificantBindingSites_Minus_AboveCutOff	NA	NA	NA	NA
STB2_deltaSignificantBindingSites_Minus_AboveCutOff	0.0044472	0.00308144	0.148957	0.282044
STP1_deltaSignificantBindingSites_Minus_AboveCutOff	0.00430355	0.00466158	0.355904	0.421967
SWI4_deltaSignificantBindingSites_Minus_AboveCutOff	0.00233261	0.0030853	0.449626	0.468953
SWI6_deltaSignificantBindingSites_Minus_AboveCutOff	0.000767784	0.00257881	0.76591	0.56352
THI2_deltaSignificantBindingSites_Minus_AboveCutOff	NA	NA	NA	NA
URC2_deltaSignificantBindingSites_Minus_AboveCutOff	NA	NA	NA	NA
YHP1_deltaSignificantBindingSites_Minus_AboveCutOff	-0.00111998	0.00277891	0.686928	0.541218
YRR1_deltaSignificantBindingSites_Minus_AboveCutOff	NA	NA	NA	NA
ARG80_deltaSignificantBindingSites_Minus_AboveCutOff	-0.00150036	0.00329659	0.649021	0.526226
ARO80_deltaSignificantBindingSites_Minus_AboveCutOff	NA	NA	NA	NA
ARR1_deltaSignificantBindingSites_Minus_AboveCutOff	0.0115181	0.0028926	6.83564e-05	0.00110647
CHA4_deltaSignificantBindingSites_Minus_AboveCutOff	-0.00100812	0.00233102	0.665393	0.533046
CUP9_deltaSignificantBindingSites_Minus_AboveCutOff	NA	NA	NA	NA
HMS1_deltaSignificantBindingSites_Minus_AboveCutOff	0.00172041	0.00276716	0.534123	0.501795
INO2_deltaSignificantBindingSites_Minus_AboveCutOff	-0.00224019	0.00403757	0.579007	0.51384
MCM1_deltaSignificantBindingSites_Minus_AboveCutOff	-0.00128254	0.00233201	0.582337	0.51393
MET28_deltaSignificantBindingSites_Minus_AboveCutOff	0.0136081	0.00300243	5.83308e-06	0.000115872
MGA1_deltaSignificantBindingSites_Minus_AboveCutOff	-5.25808e-05	0.00289249	0.985497	0.623244
PDR3_deltaSignificantBindingSites_Minus_AboveCutOff	0.00208645	0.00312881	0.504868	0.490341
PHO4_deltaSignificantBindingSites_Minus_AboveCutOff	NA	NA	NA	NA
PUT3_deltaSignificantBindingSites_Minus_AboveCutOff	NA	NA	NA	NA
RAP1_deltaSignificantBindingSites_Minus_AboveCutOff	0.00136175	0.00233143	0.559166	0.508404
SMP1_deltaSignificantBindingSites_Minus_AboveCutOff	0.0198106	0.00277938	1.02058e-12	5.87716e-11
UGA3_deltaSignificantBindingSites_Minus_AboveCutOff	-0.00313123	0.00403581	0.437832	0.465159
YAP3_deltaSignificantBindingSites_Minus_AboveCutOff	0.00106284	0.00287345	0.711469	0.548746
YAP5_deltaSignificantBindingSites_Minus_AboveCutOff	-0.00087766	0.00233083	0.706512	0.548746
CUP2_deltaSignificantBindingSites_Minus_AboveCutOff	NA	NA	NA	NA
GAL80_deltaSignificantBindingSites_Minus_AboveCutOff	NA	NA	NA	NA
HAP5_deltaSignificantBindingSites_Minus_AboveCutOff	-0.00203148	0.00233095	0.383469	0.439095
HSF1_deltaSignificantBindingSites_Minus_AboveCutOff	0.00219969	0.00233123	0.345386	0.417778
INO4_deltaSignificantBindingSites_Minus_AboveCutOff	-0.00122096	0.00233133	0.600475	0.515916
MATALPHA2_deltaSignificantBindingSites_Minus_AboveCutOff	0.00719008	0.00403517	0.0747729	0.186348
ORC1_deltaSignificantBindingSites_Minus_AboveCutOff	-0.00147446	0.00269188	0.583868	0.514248
SPT15_deltaSignificantBindingSites_Minus_AboveCutOff	0.00136681	0.0026434	0.605111	0.516517
STB4_deltaSignificantBindingSites_Minus_AboveCutOff	NA	NA	NA	NA
SUM1_deltaSignificantBindingSites_Minus_AboveCutOff	0.0147784	0.0028475	2.1033e-07	5.18186e-06
UME6_deltaSignificantBindingSites_Minus_AboveCutOff	0.0236458	0.00230252	9.67024e-25	2.75922e-22
YAP1_deltaSignificantBindingSites_Minus_AboveCutOff	NA	NA	NA	NA
YDR026C_deltaSignificantBindingSites_Minus_AboveCutOff	-0.00178212	0.00329705	0.588839	0.514248
BAS1_deltaSignificantBindingSites_Minus_AboveCutOff	-0.000273331	0.00269181	0.91912	0.605949
CAD1_deltaSignificantBindingSites_Minus_AboveCutOff	-0.00116273	0.0023315	0.617988	0.52001
CIN5_deltaSignificantBindingSites_Minus_AboveCutOff	-0.00383158	0.00368357	0.298256	0.400659
CRZ1_deltaSignificantBindingSites_Minus_AboveCutOff	0.00295103	0.00269363	0.273273	0.38729
ERT1_deltaSignificantBindingSites_Minus_AboveCutOff	-0.00113113	0.00345504	0.743375	0.557949
GCN4_deltaSignificantBindingSites_Minus_AboveCutOff	0.00503756	0.00285425	0.0775754	0.189313
GCR1_deltaSignificantBindingSites_Minus_AboveCutOff	-0.00172359	0.00233098	0.459646	0.472124
HAP1_deltaSignificantBindingSites_Minus_AboveCutOff	0.00833973	0.00285176	0.00345103	0.0247082
HAP3_deltaSignificantBindingSites_Minus_AboveCutOff	NA	NA	NA	NA
LEU3_deltaSignificantBindingSites_Minus_AboveCutOff	NA	NA	NA	NA
MAC1_deltaSignificantBindingSites_Minus_AboveCutOff	-0.00243995	0.00355984	0.493085	0.483534
MBP1_deltaSignificantBindingSites_Minus_AboveCutOff	0.00957561	0.00269216	0.000375324	0.00452737
MET31_deltaSignificantBindingSites_Minus_AboveCutOff	NA	NA	NA	NA
NRG1_deltaSignificantBindingSites_Minus_AboveCutOff	-0.00183476	0.00255458	0.472619	0.478543
PHD1_deltaSignificantBindingSites_Minus_AboveCutOff	-0.00327244	0.00290244	0.25954	0.375316
RLM1_deltaSignificantBindingSites_Minus_AboveCutOff	0.0207772	0.00313941	3.63638e-11	1.44401e-09
RPH1_deltaSignificantBindingSites_Minus_AboveCutOff	-0.000240399	0.0028112	0.931852	0.607924
RPN4_deltaSignificantBindingSites_Minus_AboveCutOff	NA	NA	NA	NA
SIP4_deltaSignificantBindingSites_Minus_AboveCutOff	NA	NA	NA	NA
TEC1_deltaSignificantBindingSites_Minus_AboveCutOff	-0.00193051	0.00329599	0.558067	0.507689
TYE7_deltaSignificantBindingSites_Minus_AboveCutOff	0.00545621	0.00294728	0.0641313	0.169785
YAP6_deltaSignificantBindingSites_Minus_AboveCutOff	0.00609614	0.00335629	0.069319	0.178102
YAP7_deltaSignificantBindingSites_Minus_AboveCutOff	0.0096372	0.00329358	0.00343291	0.024687
RDS2_deltaSignificantBindingSites_Minus_AboveCutOff	0.0034704	0.00284927	0.223225	0.346618
YGR067C_deltaSignificantBindingSites_Minus_AboveCutOff	0.00441752	0.0026786	0.0991091	0.219416
YML081W_deltaSignificantBindingSites_Minus_AboveCutOff	-0.000738429	0.00287421	0.797244	0.573258
ASG1_deltaSignificantBindingSites_Minus_AboveCutOff	0.000930293	0.00233175	0.689917	0.54252
CEP3_deltaSignificantBindingSites_Minus_AboveCutOff	NA	NA	NA	NA
DOT6_deltaSignificantBindingSites_Minus_AboveCutOff	-0.00202797	0.0032024	0.526561	0.497424
ECM22_deltaSignificantBindingSites_Minus_AboveCutOff	-0.00219988	0.00294873	0.455642	0.470691
FHL1_deltaSignificantBindingSites_Minus_AboveCutOff	0.000217168	0.00295426	0.9414	0.610494
GAT1_deltaSignificantBindingSites_Minus_AboveCutOff	0.00828278	0.0028521	0.00368314	0.0259119
GAT4_deltaSignificantBindingSites_Minus_AboveCutOff	-0.00177406	0.00329584	0.59039	0.514248
HAL9_deltaSignificantBindingSites_Minus_AboveCutOff	0.0205038	0.00311157	4.41245e-11	1.71152e-09
LYS14_deltaSignificantBindingSites_Minus_AboveCutOff	NA	NA	NA	NA
MIG2_deltaSignificantBindingSites_Minus_AboveCutOff	0.00534821	0.00329512	0.104575	0.228089
MIG3_deltaSignificantBindingSites_Minus_AboveCutOff	-0.00105411	0.00233144	0.651176	0.526226
NDT80_deltaSignificantBindingSites_Minus_AboveCutOff	NA	NA	NA	NA
NHP6A_deltaSignificantBindingSites_Minus_AboveCutOff	0.000925792	0.00393824	0.814148	0.57776
NHP6B_deltaSignificantBindingSites_Minus_AboveCutOff	0.00116534	0.003084	0.70553	0.548746
OAF1_deltaSignificantBindingSites_Minus_AboveCutOff	0.00827088	0.00494038	0.0941035	0.213245
PHO2_deltaSignificantBindingSites_Minus_AboveCutOff	0.00176014	0.00312581	0.573367	0.512138
RDR1_deltaSignificantBindingSites_Minus_AboveCutOff	NA	NA	NA	NA
RDS1_deltaSignificantBindingSites_Minus_AboveCutOff	NA	NA	NA	NA
SFL1_deltaSignificantBindingSites_Minus_AboveCutOff	-0.00247941	0.0026916	0.356962	0.422222
SFP1_deltaSignificantBindingSites_Minus_AboveCutOff	0.0035567	0.00257025	0.166421	0.300426
SRD1_deltaSignificantBindingSites_Minus_AboveCutOff	NA	NA	NA	NA
STB3_deltaSignificantBindingSites_Minus_AboveCutOff	0.000816448	0.00233085	0.72613	0.552013
STP2_deltaSignificantBindingSites_Minus_AboveCutOff	0.0140715	0.00403078	0.00048119	0.00563806
SUT2_deltaSignificantBindingSites_Minus_AboveCutOff	-0.00238984	0.00403649	0.553812	0.504667
TBF1_deltaSignificantBindingSites_Minus_AboveCutOff	0.000169964	0.00466064	0.970909	0.620811
TBS1_deltaSignificantBindingSites_Minus_AboveCutOff	-0.00125395	0.00233136	0.590672	0.514248
TEA1_deltaSignificantBindingSites_Minus_AboveCutOff	NA	NA	NA	NA
TOD6_deltaSignificantBindingSites_Minus_AboveCutOff	0.0127369	0.00328956	0.000107986	0.00169517
YKL222C_deltaSignificantBindingSites_Minus_AboveCutOff	0.00154791	0.0036842	0.674377	0.538322
YLL054C_deltaSignificantBindingSites_Minus_AboveCutOff	NA	NA	NA	NA
YPR013C_deltaSignificantBindingSites_Minus_AboveCutOff	-0.000963393	0.00233154	0.679459	0.539786
YPR015C_deltaSignificantBindingSites_Minus_AboveCutOff	NA	NA	NA	NA
YRM1_deltaSignificantBindingSites_Minus_AboveCutOff	NA	NA	NA	NA
metaChangeInNumberOfTFBS_Minus_AboveCutOff	0.0210549	0.00288957	3.18065e-13	2.18949e-11
metaAverage_differenceOfMeans_Minus_AboveCutOff	0.0232444	0.00288666	8.12122e-16	8.06077e-14
metaMax_differenceOfMeans_Minus_AboveCutOff	0.0177651	0.00287006	6.02467e-10	2.02107e-08
metaAverage_differenceOfMax_Minus_AboveCutOff	0.0232342	0.00288729	8.48062e-16	8.06077e-14
metaMax_differenceOfMax_Minus_AboveCutOff	0.0178013	0.00287006	5.5596e-10	1.9023e-08
ABF2_differenceOfMax_Agnostic_AboveCutOff	0.00383617	0.00306886	0.211289	0.341371
CAT8_differenceOfMax_Agnostic_AboveCutOff	-0.000933213	0.00326084	0.774735	0.567049
CST6_differenceOfMax_Agnostic_AboveCutOff	0.00661404	0.00309152	0.0324023	0.113127
ECM23_differenceOfMax_Agnostic_AboveCutOff	-0.00298685	0.00297457	0.315317	0.403415
EDS1_differenceOfMax_Agnostic_AboveCutOff	NA	NA	NA	NA
FKH2_differenceOfMax_Agnostic_AboveCutOff	-0.00165777	0.0027609	0.548209	0.503954
FZF1_differenceOfMax_Agnostic_AboveCutOff	9.70746e-05	0.00281971	0.972537	0.620811
GIS1_differenceOfMax_Agnostic_AboveCutOff	0.00503117	0.00283404	0.0758544	0.186945
GSM1_differenceOfMax_Agnostic_AboveCutOff	0.00752061	0.00311968	0.0159222	0.0731774
GZF3_differenceOfMax_Agnostic_AboveCutOff	0.00593039	0.00287303	0.0390029	0.125378
HCM1_differenceOfMax_Agnostic_AboveCutOff	-3.32905e-05	0.00301086	0.991178	0.62406
HMRA2_differenceOfMax_Agnostic_AboveCutOff	0.00228172	0.00278762	0.413062	0.45416
NHP10_differenceOfMax_Agnostic_AboveCutOff	0.0019462	0.00260501	0.455005	0.470333
PDR8_differenceOfMax_Agnostic_AboveCutOff	-0.00190968	0.00276183	0.48928	0.483393
REB1_differenceOfMax_Agnostic_AboveCutOff	-0.00267627	0.00353629	0.449168	0.468953
REI1_differenceOfMax_Agnostic_AboveCutOff	0.0035295	0.00374406	0.345837	0.417778
RSC30_differenceOfMax_Agnostic_AboveCutOff	0.00362063	0.00298856	0.225705	0.348891
RSC3_differenceOfMax_Agnostic_AboveCutOff	0.0060685	0.0027403	0.0267916	0.102564
RSF2_differenceOfMax_Agnostic_AboveCutOff	0.0148351	0.00280175	1.19052e-07	3.12505e-06
STE12_differenceOfMax_Agnostic_AboveCutOff	-0.00219503	0.00285327	0.441713	0.466696
STP3_differenceOfMax_Agnostic_AboveCutOff	0.000264998	0.00270706	0.922018	0.606825
STP4_differenceOfMax_Agnostic_AboveCutOff	0.000546202	0.00277512	0.843967	0.583801
SWI5_differenceOfMax_Agnostic_AboveCutOff	0.00280802	0.00273131	0.303911	0.40161
TOS8_differenceOfMax_Agnostic_AboveCutOff	0.00190459	0.00282669	0.500446	0.487798
USV1_differenceOfMax_Agnostic_AboveCutOff	0.0040994	0.00284225	0.149216	0.282204
YER130C_differenceOfMax_Agnostic_AboveCutOff	0.00268159	0.00289139	0.353697	0.42174
YER184C_differenceOfMax_Agnostic_AboveCutOff	0.00271307	0.00305877	0.375089	0.434482
YLR278C_differenceOfMax_Agnostic_AboveCutOff	-0.00145564	0.00300242	0.627802	0.52393
YNR063W_differenceOfMax_Agnostic_AboveCutOff	-0.00264706	0.0028069	0.345655	0.417778
YOX1_differenceOfMax_Agnostic_AboveCutOff	-0.000261489	0.0028087	0.925824	0.6079
YPR022C_differenceOfMax_Agnostic_AboveCutOff	0.00192572	0.00272507	0.479774	0.478567
YPR196W_differenceOfMax_Agnostic_AboveCutOff	0.00485284	0.00282146	0.0854365	0.200359
ACA1_differenceOfMax_Agnostic_AboveCutOff	NA	NA	NA	NA
ADR1_differenceOfMax_Agnostic_AboveCutOff	NA	NA	NA	NA
AFT1_differenceOfMax_Agnostic_AboveCutOff	-0.0010087	0.00329057	0.759191	0.56317
DAL81_differenceOfMax_Agnostic_AboveCutOff	0.00139247	0.00233113	0.550283	0.503954
DAL82_differenceOfMax_Agnostic_AboveCutOff	-0.00142326	0.00285704	0.618372	0.52001
DIG1_differenceOfMax_Agnostic_AboveCutOff	NA	NA	NA	NA
FKH1_differenceOfMax_Agnostic_AboveCutOff	-0.00174701	0.00286873	0.542535	0.503935
MIG1_differenceOfMax_Agnostic_AboveCutOff	-0.000868168	0.00233082	0.709541	0.548746
OPI1_differenceOfMax_Agnostic_AboveCutOff	-0.00277222	0.00288412	0.336452	0.417778
PIP2_differenceOfMax_Agnostic_AboveCutOff	-0.00141021	0.00233133	0.545249	0.503935
PPR1_differenceOfMax_Agnostic_AboveCutOff	1.26216e-05	0.00233207	0.995682	0.624401
RGM1_differenceOfMax_Agnostic_AboveCutOff	-0.000696765	0.00233233	0.765136	0.563337
RTG1_differenceOfMax_Agnostic_AboveCutOff	NA	NA	NA	NA
SKN7_differenceOfMax_Agnostic_AboveCutOff	-8.98579e-05	0.00285935	0.97493	0.620811
UPC2_differenceOfMax_Agnostic_AboveCutOff	-0.000660895	0.00328236	0.840427	0.583446
WAR1_differenceOfMax_Agnostic_AboveCutOff	NA	NA	NA	NA
XBP1_differenceOfMax_Agnostic_AboveCutOff	-0.000976125	0.00266443	0.714101	0.549566
AFT2_differenceOfMax_Agnostic_AboveCutOff	0.00609219	0.0028096	0.0301321	0.108274
MATA2_differenceOfMax_Agnostic_AboveCutOff	0.00608583	0.00284602	0.0324873	0.113158
MSN1_differenceOfMax_Agnostic_AboveCutOff	0.000946707	0.00255587	0.71108	0.548746
NRG2_differenceOfMax_Agnostic_AboveCutOff	0.00315353	0.00298932	0.291457	0.396779
ROX1_differenceOfMax_Agnostic_AboveCutOff	0.00696765	0.00294043	0.0178071	0.0784024
DAL80_differenceOfMax_Agnostic_AboveCutOff	0.000229447	0.00297312	0.938485	0.609071
GLN3_differenceOfMax_Agnostic_AboveCutOff	0.00224461	0.00266134	0.398997	0.446252
HAP4_differenceOfMax_Agnostic_AboveCutOff	-0.00240329	0.00307265	0.434123	0.464419
MET4_differenceOfMax_Agnostic_AboveCutOff	-0.00134707	0.00233359	0.56377	0.508886
MOT2_differenceOfMax_Agnostic_AboveCutOff	-0.00242528	0.00310891	0.43533	0.465028
MSN2_differenceOfMax_Agnostic_AboveCutOff	-0.000284362	0.00316554	0.928422	0.607924
MSN4_differenceOfMax_Agnostic_AboveCutOff	0.0053907	0.0031696	0.0889897	0.206009
NDD1_differenceOfMax_Agnostic_AboveCutOff	0.00629851	0.00296079	0.0333947	0.114116
RIM101_differenceOfMax_Agnostic_AboveCutOff	0.00266809	0.00247263	0.280566	0.391811
SOK2_differenceOfMax_Agnostic_AboveCutOff	0.00338789	0.00285158	0.234803	0.357368
SPT23_differenceOfMax_Agnostic_AboveCutOff	0.0031507	0.00299425	0.292685	0.397305
SPT2_differenceOfMax_Agnostic_AboveCutOff	0.00371285	0.00319208	0.244771	0.364065
STB1_differenceOfMax_Agnostic_AboveCutOff	-0.000428132	0.0026055	0.86948	0.592469
STB5_differenceOfMax_Agnostic_AboveCutOff	0.00929156	0.00253624	0.000248774	0.00327121
SUT1_differenceOfMax_Agnostic_AboveCutOff	0.00247882	0.00285536	0.385324	0.439095
THO2_differenceOfMax_Agnostic_AboveCutOff	9.18734e-05	0.00281783	0.97399	0.620811
UME1_differenceOfMax_Agnostic_AboveCutOff	-0.00155288	0.00330028	0.637976	0.526226
ZAP1_differenceOfMax_Agnostic_AboveCutOff	NA	NA	NA	NA
ABF1_differenceOfMax_Agnostic_AboveCutOff	0.00903061	0.00307586	0.0033252	0.0241265
ACE2_differenceOfMax_Agnostic_AboveCutOff	0.00738613	0.00278421	0.00798132	0.0450114
ARG81_differenceOfMax_Agnostic_AboveCutOff	0.00944454	0.00271921	0.000514163	0.00598053
ASH1_differenceOfMax_Agnostic_AboveCutOff	-0.00024289	0.00276702	0.930051	0.607924
AZF1_differenceOfMax_Agnostic_AboveCutOff	NA	NA	NA	NA
CBF1_differenceOfMax_Agnostic_AboveCutOff	0.0033808	0.00274618	0.218288	0.342572
GAL4_differenceOfMax_Agnostic_AboveCutOff	NA	NA	NA	NA
GAT3_differenceOfMax_Agnostic_AboveCutOff	-0.00302085	0.0029359	0.303511	0.40161
GCR2_differenceOfMax_Agnostic_AboveCutOff	-0.00467603	0.00315991	0.138927	0.269661
GTS1_differenceOfMax_Agnostic_AboveCutOff	-0.000209143	0.00247458	0.932646	0.607924
HAC1_differenceOfMax_Agnostic_AboveCutOff	NA	NA	NA	NA
HAP2_differenceOfMax_Agnostic_AboveCutOff	0.0219212	0.00242794	1.73664e-19	2.79713e-17
IME1_differenceOfMax_Agnostic_AboveCutOff	-0.000116862	0.00282502	0.967004	0.619653
IXR1_differenceOfMax_Agnostic_AboveCutOff	NA	NA	NA	NA
JHD1_differenceOfMax_Agnostic_AboveCutOff	-0.000669372	0.00312597	0.830444	0.581421
MATA1_differenceOfMax_Agnostic_AboveCutOff	0.00584408	0.00261482	0.0254183	0.0987066
MET32_differenceOfMax_Agnostic_AboveCutOff	NA	NA	NA	NA
MOT3_differenceOfMax_Agnostic_AboveCutOff	0.0153861	0.00293041	1.51682e-07	3.8566e-06
PDR1_differenceOfMax_Agnostic_AboveCutOff	-0.0010501	0.00233081	0.652327	0.526226
RFX1_differenceOfMax_Agnostic_AboveCutOff	0.00744499	0.00232854	0.00138734	0.0128939
RGT1_differenceOfMax_Agnostic_AboveCutOff	NA	NA	NA	NA
RME1_differenceOfMax_Agnostic_AboveCutOff	0.00646284	0.0029601	0.0290127	0.106231
RTG3_differenceOfMax_Agnostic_AboveCutOff	-3.63307e-05	0.0030978	0.990643	0.623965
SKO1_differenceOfMax_Agnostic_AboveCutOff	NA	NA	NA	NA
SNF1_differenceOfMax_Agnostic_AboveCutOff	NA	NA	NA	NA
SNT2_differenceOfMax_Agnostic_AboveCutOff	NA	NA	NA	NA
STB2_differenceOfMax_Agnostic_AboveCutOff	0.00602751	0.00321707	0.0609853	0.16523
STP1_differenceOfMax_Agnostic_AboveCutOff	0.000714864	0.00361688	0.843322	0.583801
SWI4_differenceOfMax_Agnostic_AboveCutOff	0.00529305	0.00282748	0.0612067	0.165279
SWI6_differenceOfMax_Agnostic_AboveCutOff	0.00504207	0.0026723	0.0591886	0.163085
THI2_differenceOfMax_Agnostic_AboveCutOff	0.0177468	0.00944272	0.0601873	0.164269
URC2_differenceOfMax_Agnostic_AboveCutOff	NA	NA	NA	NA
YHP1_differenceOfMax_Agnostic_AboveCutOff	-0.0032195	0.00274361	0.240614	0.362197
YRR1_differenceOfMax_Agnostic_AboveCutOff	NA	NA	NA	NA
ARG80_differenceOfMax_Agnostic_AboveCutOff	-0.00334312	0.00315664	0.289564	0.395863
ARO80_differenceOfMax_Agnostic_AboveCutOff	NA	NA	NA	NA
ARR1_differenceOfMax_Agnostic_AboveCutOff	0.0051862	0.00264116	0.0495752	0.144973
CHA4_differenceOfMax_Agnostic_AboveCutOff	-0.00155964	0.00257497	0.544719	0.503935
CUP9_differenceOfMax_Agnostic_AboveCutOff	NA	NA	NA	NA
HMS1_differenceOfMax_Agnostic_AboveCutOff	0.00626905	0.00279638	0.0249713	0.0982498
INO2_differenceOfMax_Agnostic_AboveCutOff	0.00170672	0.00306381	0.577488	0.51384
MCM1_differenceOfMax_Agnostic_AboveCutOff	-0.00222648	0.0023338	0.340076	0.417778
MET28_differenceOfMax_Agnostic_AboveCutOff	0.00900306	0.00296061	0.00235837	0.0184351
MGA1_differenceOfMax_Agnostic_AboveCutOff	-0.000158484	0.00281389	0.955085	0.615371
PDR3_differenceOfMax_Agnostic_AboveCutOff	0.00231461	0.00335711	0.49053	0.483534
PHO4_differenceOfMax_Agnostic_AboveCutOff	NA	NA	NA	NA
PUT3_differenceOfMax_Agnostic_AboveCutOff	NA	NA	NA	NA
RAP1_differenceOfMax_Agnostic_AboveCutOff	-0.000177904	0.00260019	0.945452	0.612124
SMP1_differenceOfMax_Agnostic_AboveCutOff	0.017094	0.0026569	1.24433e-10	4.58211e-09
UGA3_differenceOfMax_Agnostic_AboveCutOff	-0.00371632	0.00291125	0.201766	0.334424
YAP3_differenceOfMax_Agnostic_AboveCutOff	0.00331589	0.00282059	0.239755	0.36191
YAP5_differenceOfMax_Agnostic_AboveCutOff	-0.000796626	0.00233114	0.732552	0.554558
CUP2_differenceOfMax_Agnostic_AboveCutOff	NA	NA	NA	NA
GAL80_differenceOfMax_Agnostic_AboveCutOff	NA	NA	NA	NA
HAP5_differenceOfMax_Agnostic_AboveCutOff	-0.00295454	0.00298386	0.322088	0.407788
HSF1_differenceOfMax_Agnostic_AboveCutOff	0.00187782	0.00233122	0.420527	0.458332
INO4_differenceOfMax_Agnostic_AboveCutOff	-0.00193062	0.00297199	0.515949	0.493609
MATALPHA2_differenceOfMax_Agnostic_AboveCutOff	0.0043656	0.00375197	0.244607	0.364065
ORC1_differenceOfMax_Agnostic_AboveCutOff	0.00674687	0.00264819	0.0108426	0.0562512
SPT15_differenceOfMax_Agnostic_AboveCutOff	0.00596475	0.0027415	0.0295755	0.106919
STB4_differenceOfMax_Agnostic_AboveCutOff	NA	NA	NA	NA
SUM1_differenceOfMax_Agnostic_AboveCutOff	0.0122142	0.00254369	1.57281e-06	3.38741e-05
UME6_differenceOfMax_Agnostic_AboveCutOff	0.0365952	0.00226221	7.36053e-59	2.00507e-54
YAP1_differenceOfMax_Agnostic_AboveCutOff	NA	NA	NA	NA
YDR026C_differenceOfMax_Agnostic_AboveCutOff	-0.00241946	0.00323069	0.453917	0.470333
BAS1_differenceOfMax_Agnostic_AboveCutOff	-0.000738108	0.00312009	0.812993	0.577488
CAD1_differenceOfMax_Agnostic_AboveCutOff	-0.00116273	0.0023315	0.617988	0.52001
CIN5_differenceOfMax_Agnostic_AboveCutOff	0.00625561	0.00293076	0.0328046	0.113292
CRZ1_differenceOfMax_Agnostic_AboveCutOff	0.00791197	0.00282571	0.00511034	0.0332117
ERT1_differenceOfMax_Agnostic_AboveCutOff	-0.00185892	0.00299689	0.535073	0.501924
GCN4_differenceOfMax_Agnostic_AboveCutOff	0.00366447	0.0026681	0.169616	0.301924
GCR1_differenceOfMax_Agnostic_AboveCutOff	-0.00193435	0.00254473	0.44717	0.468498
HAP1_differenceOfMax_Agnostic_AboveCutOff	0.00727906	0.00276205	0.0084043	0.047067
HAP3_differenceOfMax_Agnostic_AboveCutOff	-0.000326973	0.00312641	0.916706	0.604672
LEU3_differenceOfMax_Agnostic_AboveCutOff	NA	NA	NA	NA
MAC1_differenceOfMax_Agnostic_AboveCutOff	0.00363901	0.00300482	0.225873	0.348891
MBP1_differenceOfMax_Agnostic_AboveCutOff	0.00696739	0.00275474	0.011431	0.058187
MET31_differenceOfMax_Agnostic_AboveCutOff	NA	NA	NA	NA
NRG1_differenceOfMax_Agnostic_AboveCutOff	0.00163828	0.00290875	0.573282	0.512138
PHD1_differenceOfMax_Agnostic_AboveCutOff	-0.000173722	0.00288132	0.951923	0.614597
RLM1_differenceOfMax_Agnostic_AboveCutOff	0.0203283	0.0030214	1.71881e-11	7.3589e-10
RPH1_differenceOfMax_Agnostic_AboveCutOff	0.000827725	0.00272763	0.761539	0.563232
RPN4_differenceOfMax_Agnostic_AboveCutOff	-0.000641926	0.00233114	0.783032	0.568899
SIP4_differenceOfMax_Agnostic_AboveCutOff	NA	NA	NA	NA
TEC1_differenceOfMax_Agnostic_AboveCutOff	0.000534629	0.00321659	0.867992	0.5922
TYE7_differenceOfMax_Agnostic_AboveCutOff	0.00665437	0.00330665	0.0441756	0.134844
YAP6_differenceOfMax_Agnostic_AboveCutOff	0.00252739	0.00313432	0.420034	0.458332
YAP7_differenceOfMax_Agnostic_AboveCutOff	0.00713188	0.00293255	0.015017	0.0710791
RDS2_differenceOfMax_Agnostic_AboveCutOff	0.00861261	0.002832	0.00235654	0.0184351
YGR067C_differenceOfMax_Agnostic_AboveCutOff	0.00398739	0.002812	0.156193	0.289329
YML081W_differenceOfMax_Agnostic_AboveCutOff	0.00501879	0.00276203	0.0692075	0.178102
ASG1_differenceOfMax_Agnostic_AboveCutOff	-0.000158519	0.00250731	0.949589	0.613823
CEP3_differenceOfMax_Agnostic_AboveCutOff	NA	NA	NA	NA
DOT6_differenceOfMax_Agnostic_AboveCutOff	-0.000422086	0.00303319	0.889327	0.599022
ECM22_differenceOfMax_Agnostic_AboveCutOff	-0.00285293	0.00290799	0.326561	0.410489
FHL1_differenceOfMax_Agnostic_AboveCutOff	0.00176739	0.00296073	0.550546	0.503954
GAT1_differenceOfMax_Agnostic_AboveCutOff	0.0101939	0.00280142	0.00027387	0.00346576
GAT4_differenceOfMax_Agnostic_AboveCutOff	-0.00132642	0.00288405	0.645577	0.526226
HAL9_differenceOfMax_Agnostic_AboveCutOff	0.0294762	0.00279144	4.59196e-26	2.22201e-23
LYS14_differenceOfMax_Agnostic_AboveCutOff	NA	NA	NA	NA
MIG2_differenceOfMax_Agnostic_AboveCutOff	0.000732895	0.00285744	0.797576	0.573258
MIG3_differenceOfMax_Agnostic_AboveCutOff	-0.00105411	0.00233144	0.651176	0.526226
NDT80_differenceOfMax_Agnostic_AboveCutOff	-0.000625886	0.00572849	0.912997	0.604628
NHP6A_differenceOfMax_Agnostic_AboveCutOff	0.002373	0.00315921	0.45257	0.470333
NHP6B_differenceOfMax_Agnostic_AboveCutOff	-3.04776e-05	0.00344737	0.992946	0.624401
OAF1_differenceOfMax_Agnostic_AboveCutOff	0.00239989	0.00386154	0.53428	0.501795
PHO2_differenceOfMax_Agnostic_AboveCutOff	0.00038715	0.00280353	0.890166	0.599022
RDR1_differenceOfMax_Agnostic_AboveCutOff	NA	NA	NA	NA
RDS1_differenceOfMax_Agnostic_AboveCutOff	NA	NA	NA	NA
SFL1_differenceOfMax_Agnostic_AboveCutOff	-0.00321988	0.00277812	0.246451	0.365225
SFP1_differenceOfMax_Agnostic_AboveCutOff	0.00603908	0.00281775	0.032095	0.112759
SRD1_differenceOfMax_Agnostic_AboveCutOff	NA	NA	NA	NA
STB3_differenceOfMax_Agnostic_AboveCutOff	0.000816448	0.00233085	0.72613	0.552013
STP2_differenceOfMax_Agnostic_AboveCutOff	0.014802	0.00390353	0.000149475	0.00223727
SUT2_differenceOfMax_Agnostic_AboveCutOff	-0.00280116	0.00473123	0.553812	0.504667
TBF1_differenceOfMax_Agnostic_AboveCutOff	0.000922816	0.00305531	0.762624	0.563337
TBS1_differenceOfMax_Agnostic_AboveCutOff	-0.00125395	0.00233136	0.590672	0.514248
TEA1_differenceOfMax_Agnostic_AboveCutOff	NA	NA	NA	NA
TOD6_differenceOfMax_Agnostic_AboveCutOff	0.0134598	0.00297865	6.2204e-06	0.000117912
YKL222C_differenceOfMax_Agnostic_AboveCutOff	-0.00107519	0.00328374	0.743344	0.557949
YLL054C_differenceOfMax_Agnostic_AboveCutOff	NA	NA	NA	NA
YPR013C_differenceOfMax_Agnostic_AboveCutOff	0.00114648	0.00233292	0.623119	0.521675
YPR015C_differenceOfMax_Agnostic_AboveCutOff	NA	NA	NA	NA
YRM1_differenceOfMax_Agnostic_AboveCutOff	NA	NA	NA	NA
ABF2_differenceOfMeans_Agnostic_AboveCutOff	0.00383617	0.00306886	0.211289	0.341371
CAT8_differenceOfMeans_Agnostic_AboveCutOff	-0.000924279	0.00326072	0.776825	0.567437
CST6_differenceOfMeans_Agnostic_AboveCutOff	0.0067606	0.00310086	0.0292404	0.106231
ECM23_differenceOfMeans_Agnostic_AboveCutOff	-0.00289296	0.00298394	0.332291	0.415672
EDS1_differenceOfMeans_Agnostic_AboveCutOff	NA	NA	NA	NA
FKH2_differenceOfMeans_Agnostic_AboveCutOff	-0.00165777	0.0027609	0.548209	0.503954
FZF1_differenceOfMeans_Agnostic_AboveCutOff	9.70746e-05	0.00281971	0.972537	0.620811
GIS1_differenceOfMeans_Agnostic_AboveCutOff	0.00503117	0.00283404	0.0758544	0.186945
GSM1_differenceOfMeans_Agnostic_AboveCutOff	0.00841491	0.00307668	0.00623686	0.0385208
GZF3_differenceOfMeans_Agnostic_AboveCutOff	0.00594268	0.00287077	0.0384465	0.124555
HCM1_differenceOfMeans_Agnostic_AboveCutOff	6.16334e-05	0.00301086	0.983668	0.623244
HMRA2_differenceOfMeans_Agnostic_AboveCutOff	0.00231341	0.00279013	0.407025	0.450074
NHP10_differenceOfMeans_Agnostic_AboveCutOff	0.0019462	0.00260501	0.455005	0.470333
PDR8_differenceOfMeans_Agnostic_AboveCutOff	-0.00190966	0.00276181	0.48928	0.483393
REB1_differenceOfMeans_Agnostic_AboveCutOff	-0.00267627	0.00353629	0.449168	0.468953
REI1_differenceOfMeans_Agnostic_AboveCutOff	0.0035295	0.00374406	0.345837	0.417778
RSC30_differenceOfMeans_Agnostic_AboveCutOff	0.00362063	0.00298856	0.225705	0.348891
RSC3_differenceOfMeans_Agnostic_AboveCutOff	0.00567279	0.00273158	0.0378252	0.123467
RSF2_differenceOfMeans_Agnostic_AboveCutOff	0.0148351	0.00280175	1.19052e-07	3.12505e-06
STE12_differenceOfMeans_Agnostic_AboveCutOff	-0.00219503	0.00285327	0.441713	0.466696
STP3_differenceOfMeans_Agnostic_AboveCutOff	0.000264998	0.00270706	0.922018	0.606825
STP4_differenceOfMeans_Agnostic_AboveCutOff	0.000524074	0.00277006	0.849942	0.584058
SWI5_differenceOfMeans_Agnostic_AboveCutOff	0.00280802	0.00273131	0.303911	0.40161
TOS8_differenceOfMeans_Agnostic_AboveCutOff	0.00190459	0.00282669	0.500446	0.487798
USV1_differenceOfMeans_Agnostic_AboveCutOff	0.00390272	0.00284825	0.17062	0.301924
YER130C_differenceOfMeans_Agnostic_AboveCutOff	0.00268159	0.00289139	0.353697	0.42174
YER184C_differenceOfMeans_Agnostic_AboveCutOff	0.00283055	0.00304178	0.352083	0.421364
YLR278C_differenceOfMeans_Agnostic_AboveCutOff	-0.00145564	0.00300242	0.627802	0.52393
YNR063W_differenceOfMeans_Agnostic_AboveCutOff	-0.00264706	0.0028069	0.345655	0.417778
YOX1_differenceOfMeans_Agnostic_AboveCutOff	-0.000265238	0.00281005	0.9248	0.607473
YPR022C_differenceOfMeans_Agnostic_AboveCutOff	0.00192572	0.00272507	0.479774	0.478567
YPR196W_differenceOfMeans_Agnostic_AboveCutOff	0.00489124	0.00282051	0.0828883	0.197812
ACA1_differenceOfMeans_Agnostic_AboveCutOff	NA	NA	NA	NA
ADR1_differenceOfMeans_Agnostic_AboveCutOff	NA	NA	NA	NA
AFT1_differenceOfMeans_Agnostic_AboveCutOff	-0.0010087	0.00329057	0.759191	0.56317
DAL81_differenceOfMeans_Agnostic_AboveCutOff	0.00139247	0.00233113	0.550283	0.503954
DAL82_differenceOfMeans_Agnostic_AboveCutOff	-0.00142326	0.00285704	0.618372	0.52001
DIG1_differenceOfMeans_Agnostic_AboveCutOff	NA	NA	NA	NA
FKH1_differenceOfMeans_Agnostic_AboveCutOff	-0.00174701	0.00286873	0.542535	0.503935
MIG1_differenceOfMeans_Agnostic_AboveCutOff	-0.000868168	0.00233082	0.709541	0.548746
OPI1_differenceOfMeans_Agnostic_AboveCutOff	-0.00277222	0.00288412	0.336452	0.417778
PIP2_differenceOfMeans_Agnostic_AboveCutOff	-0.00141021	0.00233133	0.545249	0.503935
PPR1_differenceOfMeans_Agnostic_AboveCutOff	1.26216e-05	0.00233207	0.995682	0.624401
RGM1_differenceOfMeans_Agnostic_AboveCutOff	-0.000696765	0.00233233	0.765136	0.563337
RTG1_differenceOfMeans_Agnostic_AboveCutOff	NA	NA	NA	NA
SKN7_differenceOfMeans_Agnostic_AboveCutOff	-8.98579e-05	0.00285935	0.97493	0.620811
UPC2_differenceOfMeans_Agnostic_AboveCutOff	-0.000660895	0.00328236	0.840427	0.583446
WAR1_differenceOfMeans_Agnostic_AboveCutOff	NA	NA	NA	NA
XBP1_differenceOfMeans_Agnostic_AboveCutOff	-0.000990137	0.00266431	0.710169	0.548746
AFT2_differenceOfMeans_Agnostic_AboveCutOff	0.00609219	0.0028096	0.0301321	0.108274
MATA2_differenceOfMeans_Agnostic_AboveCutOff	0.00609164	0.00284656	0.0323548	0.113127
MSN1_differenceOfMeans_Agnostic_AboveCutOff	0.000946707	0.00255587	0.71108	0.548746
NRG2_differenceOfMeans_Agnostic_AboveCutOff	0.00315353	0.00298932	0.291457	0.396779
ROX1_differenceOfMeans_Agnostic_AboveCutOff	0.00696765	0.00294043	0.0178071	0.0784024
DAL80_differenceOfMeans_Agnostic_AboveCutOff	0.000229447	0.00297312	0.938485	0.609071
GLN3_differenceOfMeans_Agnostic_AboveCutOff	0.00224461	0.00266134	0.398997	0.446252
HAP4_differenceOfMeans_Agnostic_AboveCutOff	-0.00240329	0.00307265	0.434123	0.464419
MET4_differenceOfMeans_Agnostic_AboveCutOff	-0.00134707	0.00233359	0.56377	0.508886
MOT2_differenceOfMeans_Agnostic_AboveCutOff	-0.00242528	0.00310891	0.43533	0.465028
MSN2_differenceOfMeans_Agnostic_AboveCutOff	-0.000340454	0.00316636	0.914375	0.604672
MSN4_differenceOfMeans_Agnostic_AboveCutOff	0.0053907	0.0031696	0.0889897	0.206009
NDD1_differenceOfMeans_Agnostic_AboveCutOff	0.00630116	0.00296151	0.0333631	0.114116
RIM101_differenceOfMeans_Agnostic_AboveCutOff	0.00266809	0.00247263	0.280566	0.391811
SOK2_differenceOfMeans_Agnostic_AboveCutOff	0.00338789	0.00285158	0.234803	0.357368
SPT23_differenceOfMeans_Agnostic_AboveCutOff	0.0031507	0.00299425	0.292685	0.397305
SPT2_differenceOfMeans_Agnostic_AboveCutOff	0.00371285	0.00319208	0.244771	0.364065
STB1_differenceOfMeans_Agnostic_AboveCutOff	-0.000428132	0.0026055	0.86948	0.592469
STB5_differenceOfMeans_Agnostic_AboveCutOff	0.00951414	0.00253972	0.000179573	0.00259185
SUT1_differenceOfMeans_Agnostic_AboveCutOff	0.00247882	0.00285536	0.385324	0.439095
THO2_differenceOfMeans_Agnostic_AboveCutOff	9.18734e-05	0.00281783	0.97399	0.620811
UME1_differenceOfMeans_Agnostic_AboveCutOff	-0.00155288	0.00330028	0.637976	0.526226
ZAP1_differenceOfMeans_Agnostic_AboveCutOff	NA	NA	NA	NA
ABF1_differenceOfMeans_Agnostic_AboveCutOff	0.00903061	0.00307586	0.0033252	0.0241265
ACE2_differenceOfMeans_Agnostic_AboveCutOff	0.00738613	0.00278421	0.00798132	0.0450114
ARG81_differenceOfMeans_Agnostic_AboveCutOff	0.00951164	0.00271895	0.000468271	0.0055266
ASH1_differenceOfMeans_Agnostic_AboveCutOff	-0.000308597	0.00276803	0.911231	0.604628
AZF1_differenceOfMeans_Agnostic_AboveCutOff	NA	NA	NA	NA
CBF1_differenceOfMeans_Agnostic_AboveCutOff	0.00342937	0.00278563	0.218288	0.342572
GAL4_differenceOfMeans_Agnostic_AboveCutOff	NA	NA	NA	NA
GAT3_differenceOfMeans_Agnostic_AboveCutOff	-0.00302085	0.0029359	0.303511	0.40161
GCR2_differenceOfMeans_Agnostic_AboveCutOff	-0.00467603	0.00315991	0.138927	0.269661
GTS1_differenceOfMeans_Agnostic_AboveCutOff	-0.000209143	0.00247458	0.932646	0.607924
HAC1_differenceOfMeans_Agnostic_AboveCutOff	NA	NA	NA	NA
HAP2_differenceOfMeans_Agnostic_AboveCutOff	0.0220349	0.00242867	1.15975e-19	2.10835e-17
IME1_differenceOfMeans_Agnostic_AboveCutOff	-0.000116862	0.00282502	0.967004	0.619653
IXR1_differenceOfMeans_Agnostic_AboveCutOff	NA	NA	NA	NA
JHD1_differenceOfMeans_Agnostic_AboveCutOff	-0.000669372	0.00312597	0.830444	0.581421
MATA1_differenceOfMeans_Agnostic_AboveCutOff	0.00584408	0.00261482	0.0254183	0.0987066
MET32_differenceOfMeans_Agnostic_AboveCutOff	NA	NA	NA	NA
MOT3_differenceOfMeans_Agnostic_AboveCutOff	0.0153861	0.00293041	1.51682e-07	3.8566e-06
PDR1_differenceOfMeans_Agnostic_AboveCutOff	-0.0010501	0.00233081	0.652327	0.526226
RFX1_differenceOfMeans_Agnostic_AboveCutOff	0.00744499	0.00232854	0.00138734	0.0128939
RGT1_differenceOfMeans_Agnostic_AboveCutOff	NA	NA	NA	NA
RME1_differenceOfMeans_Agnostic_AboveCutOff	0.00646284	0.0029601	0.0290127	0.106231
RTG3_differenceOfMeans_Agnostic_AboveCutOff	-3.63307e-05	0.0030978	0.990643	0.623965
SKO1_differenceOfMeans_Agnostic_AboveCutOff	NA	NA	NA	NA
SNF1_differenceOfMeans_Agnostic_AboveCutOff	NA	NA	NA	NA
SNT2_differenceOfMeans_Agnostic_AboveCutOff	NA	NA	NA	NA
STB2_differenceOfMeans_Agnostic_AboveCutOff	0.00602119	0.0032137	0.0609853	0.16523
STP1_differenceOfMeans_Agnostic_AboveCutOff	0.000714864	0.00361688	0.843322	0.583801
SWI4_differenceOfMeans_Agnostic_AboveCutOff	0.00529305	0.00282748	0.0612067	0.165279
SWI6_differenceOfMeans_Agnostic_AboveCutOff	0.00496121	0.00267519	0.0636635	0.169375
THI2_differenceOfMeans_Agnostic_AboveCutOff	0.0177468	0.00944272	0.0601873	0.164269
URC2_differenceOfMeans_Agnostic_AboveCutOff	NA	NA	NA	NA
YHP1_differenceOfMeans_Agnostic_AboveCutOff	-0.0032195	0.00274361	0.240614	0.362197
YRR1_differenceOfMeans_Agnostic_AboveCutOff	NA	NA	NA	NA
ARG80_differenceOfMeans_Agnostic_AboveCutOff	-0.00334312	0.00315664	0.289564	0.395863
ARO80_differenceOfMeans_Agnostic_AboveCutOff	NA	NA	NA	NA
ARR1_differenceOfMeans_Agnostic_AboveCutOff	0.0051862	0.00264116	0.0495752	0.144973
CHA4_differenceOfMeans_Agnostic_AboveCutOff	-0.00155964	0.00257497	0.544719	0.503935
CUP9_differenceOfMeans_Agnostic_AboveCutOff	NA	NA	NA	NA
HMS1_differenceOfMeans_Agnostic_AboveCutOff	0.00636348	0.00278898	0.0225102	0.0925046
INO2_differenceOfMeans_Agnostic_AboveCutOff	0.00170672	0.00306381	0.577488	0.51384
MCM1_differenceOfMeans_Agnostic_AboveCutOff	-0.00222377	0.00233379	0.340662	0.417778
MET28_differenceOfMeans_Agnostic_AboveCutOff	0.00900306	0.00296061	0.00235837	0.0184351
MGA1_differenceOfMeans_Agnostic_AboveCutOff	-0.00020479	0.00281224	0.941949	0.610505
PDR3_differenceOfMeans_Agnostic_AboveCutOff	0.00238527	0.0033593	0.477673	0.478567
PHO4_differenceOfMeans_Agnostic_AboveCutOff	NA	NA	NA	NA
PUT3_differenceOfMeans_Agnostic_AboveCutOff	NA	NA	NA	NA
RAP1_differenceOfMeans_Agnostic_AboveCutOff	-0.000177904	0.00260019	0.945452	0.612124
SMP1_differenceOfMeans_Agnostic_AboveCutOff	0.0171333	0.00265705	1.13168e-10	4.25804e-09
UGA3_differenceOfMeans_Agnostic_AboveCutOff	-0.00371632	0.00291125	0.201766	0.334424
YAP3_differenceOfMeans_Agnostic_AboveCutOff	0.00331589	0.00282059	0.239755	0.36191
YAP5_differenceOfMeans_Agnostic_AboveCutOff	-0.000796626	0.00233114	0.732552	0.554558
CUP2_differenceOfMeans_Agnostic_AboveCutOff	NA	NA	NA	NA
GAL80_differenceOfMeans_Agnostic_AboveCutOff	NA	NA	NA	NA
HAP5_differenceOfMeans_Agnostic_AboveCutOff	-0.00295454	0.00298386	0.322088	0.407788
HSF1_differenceOfMeans_Agnostic_AboveCutOff	0.00187782	0.00233122	0.420527	0.458332
INO4_differenceOfMeans_Agnostic_AboveCutOff	-0.00193062	0.00297199	0.515949	0.493609
MATALPHA2_differenceOfMeans_Agnostic_AboveCutOff	0.0043656	0.00375197	0.244607	0.364065
ORC1_differenceOfMeans_Agnostic_AboveCutOff	0.00674687	0.00264819	0.0108426	0.0562512
SPT15_differenceOfMeans_Agnostic_AboveCutOff	0.00597995	0.00274232	0.0292118	0.106231
STB4_differenceOfMeans_Agnostic_AboveCutOff	NA	NA	NA	NA
SUM1_differenceOfMeans_Agnostic_AboveCutOff	0.0122142	0.00254369	1.57281e-06	3.38741e-05
UME6_differenceOfMeans_Agnostic_AboveCutOff	0.0365952	0.00226221	7.36053e-59	2.00507e-54
YAP1_differenceOfMeans_Agnostic_AboveCutOff	NA	NA	NA	NA
YDR026C_differenceOfMeans_Agnostic_AboveCutOff	-0.00241946	0.00323069	0.453917	0.470333
BAS1_differenceOfMeans_Agnostic_AboveCutOff	-0.000738108	0.00312009	0.812993	0.577488
CAD1_differenceOfMeans_Agnostic_AboveCutOff	-0.00116273	0.0023315	0.617988	0.52001
CIN5_differenceOfMeans_Agnostic_AboveCutOff	0.00624963	0.00292796	0.0328046	0.113292
CRZ1_differenceOfMeans_Agnostic_AboveCutOff	0.00791197	0.00282571	0.00511034	0.0332117
ERT1_differenceOfMeans_Agnostic_AboveCutOff	-0.00185892	0.00299689	0.535073	0.501924
GCN4_differenceOfMeans_Agnostic_AboveCutOff	0.00351793	0.00267155	0.187902	0.32163
GCR1_differenceOfMeans_Agnostic_AboveCutOff	-0.00193435	0.00254473	0.44717	0.468498
HAP1_differenceOfMeans_Agnostic_AboveCutOff	0.00727906	0.00276205	0.0084043	0.047067
HAP3_differenceOfMeans_Agnostic_AboveCutOff	-0.000326973	0.00312641	0.916706	0.604672
LEU3_differenceOfMeans_Agnostic_AboveCutOff	NA	NA	NA	NA
MAC1_differenceOfMeans_Agnostic_AboveCutOff	0.00363901	0.00300482	0.225873	0.348891
MBP1_differenceOfMeans_Agnostic_AboveCutOff	0.00699693	0.00276516	0.0113937	0.0581795
MET31_differenceOfMeans_Agnostic_AboveCutOff	NA	NA	NA	NA
NRG1_differenceOfMeans_Agnostic_AboveCutOff	0.00163828	0.00290875	0.573282	0.512138
PHD1_differenceOfMeans_Agnostic_AboveCutOff	-2.55487e-05	0.00287529	0.99291	0.624401
RLM1_differenceOfMeans_Agnostic_AboveCutOff	0.0202758	0.00299845	1.36022e-11	6.43694e-10
RPH1_differenceOfMeans_Agnostic_AboveCutOff	0.000827725	0.00272763	0.761539	0.563232
RPN4_differenceOfMeans_Agnostic_AboveCutOff	-0.000641926	0.00233114	0.783032	0.568899
SIP4_differenceOfMeans_Agnostic_AboveCutOff	NA	NA	NA	NA
TEC1_differenceOfMeans_Agnostic_AboveCutOff	0.000534629	0.00321659	0.867992	0.5922
TYE7_differenceOfMeans_Agnostic_AboveCutOff	0.0066171	0.00334042	0.0476005	0.141236
YAP6_differenceOfMeans_Agnostic_AboveCutOff	0.00250287	0.00313732	0.425002	0.460735
YAP7_differenceOfMeans_Agnostic_AboveCutOff	0.00718294	0.00293312	0.0143291	0.0690316
RDS2_differenceOfMeans_Agnostic_AboveCutOff	0.00860904	0.00283038	0.0023528	0.0184351
YGR067C_differenceOfMeans_Agnostic_AboveCutOff	0.00410251	0.00281392	0.144859	0.277849
YML081W_differenceOfMeans_Agnostic_AboveCutOff	0.00513271	0.00276123	0.0630479	0.168055
ASG1_differenceOfMeans_Agnostic_AboveCutOff	-0.000158519	0.00250731	0.949589	0.613823
CEP3_differenceOfMeans_Agnostic_AboveCutOff	NA	NA	NA	NA
DOT6_differenceOfMeans_Agnostic_AboveCutOff	-0.000422086	0.00303319	0.889327	0.599022
ECM22_differenceOfMeans_Agnostic_AboveCutOff	-0.00285293	0.00290799	0.326561	0.410489
FHL1_differenceOfMeans_Agnostic_AboveCutOff	0.00176739	0.00296073	0.550546	0.503954
GAT1_differenceOfMeans_Agnostic_AboveCutOff	0.0101939	0.00280142	0.00027387	0.00346576
GAT4_differenceOfMeans_Agnostic_AboveCutOff	-0.00132642	0.00288405	0.645577	0.526226
HAL9_differenceOfMeans_Agnostic_AboveCutOff	0.0294002	0.00278887	5.53269e-26	2.3314e-23
LYS14_differenceOfMeans_Agnostic_AboveCutOff	NA	NA	NA	NA
MIG2_differenceOfMeans_Agnostic_AboveCutOff	0.000732895	0.00285744	0.797576	0.573258
MIG3_differenceOfMeans_Agnostic_AboveCutOff	-0.00105411	0.00233144	0.651176	0.526226
NDT80_differenceOfMeans_Agnostic_AboveCutOff	-0.000625886	0.00572849	0.912997	0.604628
NHP6A_differenceOfMeans_Agnostic_AboveCutOff	0.00242943	0.00316233	0.442345	0.467007
NHP6B_differenceOfMeans_Agnostic_AboveCutOff	-2.59214e-05	0.00345403	0.994012	0.624401
OAF1_differenceOfMeans_Agnostic_AboveCutOff	0.00239989	0.00386154	0.53428	0.501795
PHO2_differenceOfMeans_Agnostic_AboveCutOff	0.000386991	0.00280237	0.890166	0.599022
RDR1_differenceOfMeans_Agnostic_AboveCutOff	NA	NA	NA	NA
RDS1_differenceOfMeans_Agnostic_AboveCutOff	NA	NA	NA	NA
SFL1_differenceOfMeans_Agnostic_AboveCutOff	-0.00321988	0.00277812	0.246451	0.365225
SFP1_differenceOfMeans_Agnostic_AboveCutOff	0.00596588	0.00281257	0.033909	0.114956
SRD1_differenceOfMeans_Agnostic_AboveCutOff	NA	NA	NA	NA
STB3_differenceOfMeans_Agnostic_AboveCutOff	0.000816448	0.00233085	0.72613	0.552013
STP2_differenceOfMeans_Agnostic_AboveCutOff	0.014802	0.00390353	0.000149475	0.00223727
SUT2_differenceOfMeans_Agnostic_AboveCutOff	-0.00280116	0.00473123	0.553812	0.504667
TBF1_differenceOfMeans_Agnostic_AboveCutOff	0.000922816	0.00305531	0.762624	0.563337
TBS1_differenceOfMeans_Agnostic_AboveCutOff	-0.00125395	0.00233136	0.590672	0.514248
TEA1_differenceOfMeans_Agnostic_AboveCutOff	NA	NA	NA	NA
TOD6_differenceOfMeans_Agnostic_AboveCutOff	0.0134598	0.00297865	6.2204e-06	0.000117912
YKL222C_differenceOfMeans_Agnostic_AboveCutOff	-0.00107519	0.00328374	0.743344	0.557949
YLL054C_differenceOfMeans_Agnostic_AboveCutOff	NA	NA	NA	NA
YPR013C_differenceOfMeans_Agnostic_AboveCutOff	0.00114648	0.00233292	0.623119	0.521675
YPR015C_differenceOfMeans_Agnostic_AboveCutOff	NA	NA	NA	NA
YRM1_differenceOfMeans_Agnostic_AboveCutOff	NA	NA	NA	NA
ABF2_deltaSignificantBindingSites_Agnostic_AboveCutOff	0.00221999	0.00323967	0.493185	0.483534
CAT8_deltaSignificantBindingSites_Agnostic_AboveCutOff	-0.00130559	0.00348778	0.708157	0.548746
CST6_deltaSignificantBindingSites_Agnostic_AboveCutOff	0.00846667	0.0030739	0.00588048	0.0364616
ECM23_deltaSignificantBindingSites_Agnostic_AboveCutOff	-0.00253246	0.00287999	0.379223	0.437086
EDS1_deltaSignificantBindingSites_Agnostic_AboveCutOff	NA	NA	NA	NA
FKH2_deltaSignificantBindingSites_Agnostic_AboveCutOff	-0.00165777	0.0027609	0.548209	0.503954
FZF1_deltaSignificantBindingSites_Agnostic_AboveCutOff	9.70746e-05	0.00281971	0.972537	0.620811
GIS1_deltaSignificantBindingSites_Agnostic_AboveCutOff	0.00531058	0.00282134	0.0597967	0.164202
GSM1_deltaSignificantBindingSites_Agnostic_AboveCutOff	0.00769952	0.00319481	0.0159522	0.0731774
GZF3_deltaSignificantBindingSites_Agnostic_AboveCutOff	0.00410171	0.00286634	0.152433	0.28564
HCM1_deltaSignificantBindingSites_Agnostic_AboveCutOff	0.000429798	0.00297528	0.88514	0.59787
HMRA2_deltaSignificantBindingSites_Agnostic_AboveCutOff	0.00164658	0.00271293	0.543891	0.503935
NHP10_deltaSignificantBindingSites_Agnostic_AboveCutOff	0.0019953	0.00260943	0.444481	0.467007
PDR8_deltaSignificantBindingSites_Agnostic_AboveCutOff	-0.00200969	0.00281788	0.475727	0.478543
REB1_deltaSignificantBindingSites_Agnostic_AboveCutOff	-0.00258776	0.0036859	0.482635	0.479352
REI1_deltaSignificantBindingSites_Agnostic_AboveCutOff	0.00372666	0.00361021	0.301952	0.40161
RSC30_deltaSignificantBindingSites_Agnostic_AboveCutOff	0.00261196	0.00308496	0.397176	0.446252
RSC3_deltaSignificantBindingSites_Agnostic_AboveCutOff	0.0139801	0.00292807	1.80159e-06	3.82823e-05
RSF2_deltaSignificantBindingSites_Agnostic_AboveCutOff	0.0147009	0.00281776	1.81608e-07	4.54429e-06
STE12_deltaSignificantBindingSites_Agnostic_AboveCutOff	-0.00197753	0.00290669	0.496291	0.485497
STP3_deltaSignificantBindingSites_Agnostic_AboveCutOff	0.000664495	0.00264457	0.801607	0.574426
STP4_deltaSignificantBindingSites_Agnostic_AboveCutOff	0.000808662	0.00276324	0.76979	0.564839
SWI5_deltaSignificantBindingSites_Agnostic_AboveCutOff	0.00207416	0.00277282	0.454441	0.470333
TOS8_deltaSignificantBindingSites_Agnostic_AboveCutOff	0.00118431	0.00284616	0.677331	0.53968
USV1_deltaSignificantBindingSites_Agnostic_AboveCutOff	0.00495225	0.0028144	0.0784745	0.191218
YER130C_deltaSignificantBindingSites_Agnostic_AboveCutOff	0.00251645	0.00292163	0.389064	0.441416
YER184C_deltaSignificantBindingSites_Agnostic_AboveCutOff	0.00294917	0.00309393	0.340482	0.417778
YLR278C_deltaSignificantBindingSites_Agnostic_AboveCutOff	-0.00214574	0.00297918	0.471374	0.478543
YNR063W_deltaSignificantBindingSites_Agnostic_AboveCutOff	-0.00237065	0.00279463	0.396278	0.446252
YOX1_deltaSignificantBindingSites_Agnostic_AboveCutOff	0.000401178	0.00289346	0.889727	0.599022
YPR022C_deltaSignificantBindingSites_Agnostic_AboveCutOff	0.00168827	0.00273496	0.537042	0.502645
YPR196W_deltaSignificantBindingSites_Agnostic_AboveCutOff	0.00500533	0.00280729	0.0745907	0.186229
ACA1_deltaSignificantBindingSites_Agnostic_AboveCutOff	NA	NA	NA	NA
ADR1_deltaSignificantBindingSites_Agnostic_AboveCutOff	NA	NA	NA	NA
AFT1_deltaSignificantBindingSites_Agnostic_AboveCutOff	-0.0010104	0.00329611	0.759191	0.56317
DAL81_deltaSignificantBindingSites_Agnostic_AboveCutOff	0.00139247	0.00233113	0.550283	0.503954
DAL82_deltaSignificantBindingSites_Agnostic_AboveCutOff	-0.00140233	0.00285456	0.623244	0.521675
DIG1_deltaSignificantBindingSites_Agnostic_AboveCutOff	NA	NA	NA	NA
FKH1_deltaSignificantBindingSites_Agnostic_AboveCutOff	-0.00172036	0.00288741	0.551299	0.504075
MIG1_deltaSignificantBindingSites_Agnostic_AboveCutOff	-0.000868168	0.00233082	0.709541	0.548746
OPI1_deltaSignificantBindingSites_Agnostic_AboveCutOff	-0.00279708	0.00285473	0.327182	0.410952
PIP2_deltaSignificantBindingSites_Agnostic_AboveCutOff	-0.00141021	0.00233133	0.545249	0.503935
PPR1_deltaSignificantBindingSites_Agnostic_AboveCutOff	1.26216e-05	0.00233207	0.995682	0.624401
RGM1_deltaSignificantBindingSites_Agnostic_AboveCutOff	-0.000696765	0.00233233	0.765136	0.563337
RTG1_deltaSignificantBindingSites_Agnostic_AboveCutOff	NA	NA	NA	NA
SKN7_deltaSignificantBindingSites_Agnostic_AboveCutOff	-0.000223926	0.00285483	0.93748	0.609071
UPC2_deltaSignificantBindingSites_Agnostic_AboveCutOff	-0.000663668	0.00329613	0.840427	0.583446
WAR1_deltaSignificantBindingSites_Agnostic_AboveCutOff	NA	NA	NA	NA
XBP1_deltaSignificantBindingSites_Agnostic_AboveCutOff	-0.00115742	0.00257144	0.652634	0.526226
AFT2_deltaSignificantBindingSites_Agnostic_AboveCutOff	0.00531198	0.0028171	0.0593464	0.163243
MATA2_deltaSignificantBindingSites_Agnostic_AboveCutOff	0.0055587	0.00276977	0.0447584	0.135029
MSN1_deltaSignificantBindingSites_Agnostic_AboveCutOff	0.000917223	0.0025414	0.718165	0.551119
NRG2_deltaSignificantBindingSites_Agnostic_AboveCutOff	0.00328334	0.00294786	0.265363	0.380185
ROX1_deltaSignificantBindingSites_Agnostic_AboveCutOff	0.00694475	0.00294823	0.0184947	0.0807105
DAL80_deltaSignificantBindingSites_Agnostic_AboveCutOff	0.000229447	0.00297312	0.938485	0.609071
GLN3_deltaSignificantBindingSites_Agnostic_AboveCutOff	0.00202823	0.00267442	0.448223	0.468953
HAP4_deltaSignificantBindingSites_Agnostic_AboveCutOff	-0.00232379	0.00300909	0.439963	0.465985
MET4_deltaSignificantBindingSites_Agnostic_AboveCutOff	-0.00134707	0.00233359	0.56377	0.508886
MOT2_deltaSignificantBindingSites_Agnostic_AboveCutOff	-0.00219358	0.00312649	0.482922	0.479352
MSN2_deltaSignificantBindingSites_Agnostic_AboveCutOff	-0.000801691	0.00293294	0.784592	0.569457
MSN4_deltaSignificantBindingSites_Agnostic_AboveCutOff	0.00538371	0.00313828	0.0862543	0.201403
NDD1_deltaSignificantBindingSites_Agnostic_AboveCutOff	0.00527378	0.00275801	0.0558544	0.156022
RIM101_deltaSignificantBindingSites_Agnostic_AboveCutOff	0.00266809	0.00247263	0.280566	0.391811
SOK2_deltaSignificantBindingSites_Agnostic_AboveCutOff	0.00314029	0.00285438	0.271261	0.385631
SPT23_deltaSignificantBindingSites_Agnostic_AboveCutOff	0.00334976	0.00307702	0.276314	0.390237
SPT2_deltaSignificantBindingSites_Agnostic_AboveCutOff	0.00205991	0.00310746	0.5074	0.491943
STB1_deltaSignificantBindingSites_Agnostic_AboveCutOff	-0.000706655	0.00255549	0.782145	0.568899
STB5_deltaSignificantBindingSites_Agnostic_AboveCutOff	0.00844271	0.00251034	0.000770526	0.00812948
SUT1_deltaSignificantBindingSites_Agnostic_AboveCutOff	0.002304	0.00289728	0.42648	0.461517
THO2_deltaSignificantBindingSites_Agnostic_AboveCutOff	0.000129341	0.00285469	0.963862	0.618893
UME1_deltaSignificantBindingSites_Agnostic_AboveCutOff	-0.00155288	0.00330028	0.637976	0.526226
ZAP1_deltaSignificantBindingSites_Agnostic_AboveCutOff	NA	NA	NA	NA
ABF1_deltaSignificantBindingSites_Agnostic_AboveCutOff	0.0090673	0.00308008	0.00324151	0.0237315
ACE2_deltaSignificantBindingSites_Agnostic_AboveCutOff	0.00744796	0.00273204	0.00640773	0.0392767
ARG81_deltaSignificantBindingSites_Agnostic_AboveCutOff	0.00837008	0.00271862	0.00207837	0.0175248
ASH1_deltaSignificantBindingSites_Agnostic_AboveCutOff	0.000690097	0.00281803	0.806544	0.575818
AZF1_deltaSignificantBindingSites_Agnostic_AboveCutOff	NA	NA	NA	NA
CBF1_deltaSignificantBindingSites_Agnostic_AboveCutOff	0.00320744	0.00260536	0.218288	0.342572
GAL4_deltaSignificantBindingSites_Agnostic_AboveCutOff	NA	NA	NA	NA
GAT3_deltaSignificantBindingSites_Agnostic_AboveCutOff	-0.00279453	0.00293014	0.340225	0.417778
GCR2_deltaSignificantBindingSites_Agnostic_AboveCutOff	-0.00467603	0.00315991	0.138927	0.269661
GTS1_deltaSignificantBindingSites_Agnostic_AboveCutOff	3.24233e-05	0.00251783	0.989726	0.623965
HAC1_deltaSignificantBindingSites_Agnostic_AboveCutOff	NA	NA	NA	NA
HAP2_deltaSignificantBindingSites_Agnostic_AboveCutOff	0.0161377	0.00239093	1.48309e-11	6.66986e-10
IME1_deltaSignificantBindingSites_Agnostic_AboveCutOff	-0.000127792	0.00285471	0.964294	0.618893
IXR1_deltaSignificantBindingSites_Agnostic_AboveCutOff	NA	NA	NA	NA
JHD1_deltaSignificantBindingSites_Agnostic_AboveCutOff	-0.000592902	0.00310003	0.848324	0.583801
MATA1_deltaSignificantBindingSites_Agnostic_AboveCutOff	0.0059964	0.00260534	0.0213589	0.0898208
MET32_deltaSignificantBindingSites_Agnostic_AboveCutOff	NA	NA	NA	NA
MOT3_deltaSignificantBindingSites_Agnostic_AboveCutOff	0.0153136	0.00305024	5.15444e-07	1.2103e-05
PDR1_deltaSignificantBindingSites_Agnostic_AboveCutOff	NA	NA	NA	NA
RFX1_deltaSignificantBindingSites_Agnostic_AboveCutOff	0.00744499	0.00232854	0.00138734	0.0128939
RGT1_deltaSignificantBindingSites_Agnostic_AboveCutOff	NA	NA	NA	NA
RME1_deltaSignificantBindingSites_Agnostic_AboveCutOff	0.00659971	0.00301911	0.0288174	0.106067
RTG3_deltaSignificantBindingSites_Agnostic_AboveCutOff	5.62165e-05	0.00312768	0.98566	0.623244
SKO1_deltaSignificantBindingSites_Agnostic_AboveCutOff	NA	NA	NA	NA
SNF1_deltaSignificantBindingSites_Agnostic_AboveCutOff	NA	NA	NA	NA
SNT2_deltaSignificantBindingSites_Agnostic_AboveCutOff	NA	NA	NA	NA
STB2_deltaSignificantBindingSites_Agnostic_AboveCutOff	0.00660412	0.00329247	0.0448752	0.135075
STP1_deltaSignificantBindingSites_Agnostic_AboveCutOff	0.000722517	0.00356263	0.839288	0.583446
SWI4_deltaSignificantBindingSites_Agnostic_AboveCutOff	0.00474854	0.00285448	0.0962045	0.215041
SWI6_deltaSignificantBindingSites_Agnostic_AboveCutOff	0.0049934	0.00257751	0.0527091	0.151139
THI2_deltaSignificantBindingSites_Agnostic_AboveCutOff	NA	NA	NA	NA
URC2_deltaSignificantBindingSites_Agnostic_AboveCutOff	NA	NA	NA	NA
YHP1_deltaSignificantBindingSites_Agnostic_AboveCutOff	-0.0032195	0.00274361	0.240614	0.362197
YRR1_deltaSignificantBindingSites_Agnostic_AboveCutOff	NA	NA	NA	NA
ARG80_deltaSignificantBindingSites_Agnostic_AboveCutOff	-0.0033134	0.0031559	0.293761	0.397305
ARO80_deltaSignificantBindingSites_Agnostic_AboveCutOff	NA	NA	NA	NA
ARR1_deltaSignificantBindingSites_Agnostic_AboveCutOff	0.00506149	0.00262926	0.054221	0.153307
CHA4_deltaSignificantBindingSites_Agnostic_AboveCutOff	-0.00159536	0.0026059	0.540398	0.502887
CUP9_deltaSignificantBindingSites_Agnostic_AboveCutOff	NA	NA	NA	NA
HMS1_deltaSignificantBindingSites_Agnostic_AboveCutOff	0.00606946	0.00282126	0.0314503	0.111217
INO2_deltaSignificantBindingSites_Agnostic_AboveCutOff	0.00217293	0.0032971	0.509868	0.492839
MCM1_deltaSignificantBindingSites_Agnostic_AboveCutOff	-0.00216854	0.00233379	0.35279	0.421587
MET28_deltaSignificantBindingSites_Agnostic_AboveCutOff	0.00895927	0.00291833	0.00214057	0.0177332
MGA1_deltaSignificantBindingSites_Agnostic_AboveCutOff	-0.000507391	0.00290862	0.861517	0.589765
PDR3_deltaSignificantBindingSites_Agnostic_AboveCutOff	0.00276395	0.00320457	0.388411	0.441099
PHO4_deltaSignificantBindingSites_Agnostic_AboveCutOff	NA	NA	NA	NA
PUT3_deltaSignificantBindingSites_Agnostic_AboveCutOff	NA	NA	NA	NA
RAP1_deltaSignificantBindingSites_Agnostic_AboveCutOff	0.000403568	0.00269262	0.88086	0.595483
SMP1_deltaSignificantBindingSites_Agnostic_AboveCutOff	0.0185042	0.00264422	2.59667e-12	1.28451e-10
UGA3_deltaSignificantBindingSites_Agnostic_AboveCutOff	-0.0037605	0.00292118	0.197982	0.331631
YAP3_deltaSignificantBindingSites_Agnostic_AboveCutOff	0.00389149	0.00281543	0.16691	0.300426
YAP5_deltaSignificantBindingSites_Agnostic_AboveCutOff	-0.000800119	0.00233114	0.731425	0.554221
CUP2_deltaSignificantBindingSites_Agnostic_AboveCutOff	NA	NA	NA	NA
GAL80_deltaSignificantBindingSites_Agnostic_AboveCutOff	NA	NA	NA	NA
HAP5_deltaSignificantBindingSites_Agnostic_AboveCutOff	-0.00278515	0.00285417	0.329154	0.412471
HSF1_deltaSignificantBindingSites_Agnostic_AboveCutOff	0.00194229	0.00233122	0.404753	0.449592
INO4_deltaSignificantBindingSites_Agnostic_AboveCutOff	-0.00190058	0.00300893	0.527617	0.497862
MATALPHA2_deltaSignificantBindingSites_Agnostic_AboveCutOff	0.00468443	0.00368528	0.203687	0.336266
ORC1_deltaSignificantBindingSites_Agnostic_AboveCutOff	0.00670803	0.00265693	0.0115789	0.0585727
SPT15_deltaSignificantBindingSites_Agnostic_AboveCutOff	0.00586925	0.00271802	0.0308201	0.110189
STB4_deltaSignificantBindingSites_Agnostic_AboveCutOff	NA	NA	NA	NA
SUM1_deltaSignificantBindingSites_Agnostic_AboveCutOff	0.0123449	0.00260012	2.05624e-06	4.25842e-05
UME6_deltaSignificantBindingSites_Agnostic_AboveCutOff	0.0365952	0.00226221	7.36053e-59	2.00507e-54
YAP1_deltaSignificantBindingSites_Agnostic_AboveCutOff	NA	NA	NA	NA
YDR026C_deltaSignificantBindingSites_Agnostic_AboveCutOff	-0.00247489	0.00329798	0.452998	0.470333
BAS1_deltaSignificantBindingSites_Agnostic_AboveCutOff	-0.000711033	0.00308407	0.817664	0.57776
CAD1_deltaSignificantBindingSites_Agnostic_AboveCutOff	-0.00116273	0.0023315	0.617988	0.52001
CIN5_deltaSignificantBindingSites_Agnostic_AboveCutOff	0.00703926	0.00311278	0.0237343	0.0959689
CRZ1_deltaSignificantBindingSites_Agnostic_AboveCutOff	0.00871813	0.00283694	0.00211865	0.0177332
ERT1_deltaSignificantBindingSites_Agnostic_AboveCutOff	-0.00170109	0.00300786	0.571702	0.511766
GCN4_deltaSignificantBindingSites_Agnostic_AboveCutOff	0.00585933	0.00264192	0.0265662	0.102168
GCR1_deltaSignificantBindingSites_Agnostic_AboveCutOff	-0.00193697	0.00255333	0.44809	0.468953
HAP1_deltaSignificantBindingSites_Agnostic_AboveCutOff	0.00711042	0.00275593	0.00987879	0.0534725
HAP3_deltaSignificantBindingSites_Agnostic_AboveCutOff	-0.000344718	0.00329608	0.916706	0.604672
LEU3_deltaSignificantBindingSites_Agnostic_AboveCutOff	NA	NA	NA	NA
MAC1_deltaSignificantBindingSites_Agnostic_AboveCutOff	0.00329094	0.00300972	0.274201	0.388267
MBP1_deltaSignificantBindingSites_Agnostic_AboveCutOff	0.00667225	0.00264612	0.0116847	0.0588098
MET31_deltaSignificantBindingSites_Agnostic_AboveCutOff	NA	NA	NA	NA
NRG1_deltaSignificantBindingSites_Agnostic_AboveCutOff	0.00144933	0.00285629	0.611863	0.519243
PHD1_deltaSignificantBindingSites_Agnostic_AboveCutOff	-0.00113053	0.00298219	0.704618	0.548746
RLM1_deltaSignificantBindingSites_Agnostic_AboveCutOff	0.0244918	0.00303504	7.04836e-16	7.51104e-14
RPH1_deltaSignificantBindingSites_Agnostic_AboveCutOff	-0.000384001	0.00271447	0.887503	0.598719
RPN4_deltaSignificantBindingSites_Agnostic_AboveCutOff	NA	NA	NA	NA
SIP4_deltaSignificantBindingSites_Agnostic_AboveCutOff	NA	NA	NA	NA
TEC1_deltaSignificantBindingSites_Agnostic_AboveCutOff	0.000301341	0.00316724	0.924201	0.607326
TYE7_deltaSignificantBindingSites_Agnostic_AboveCutOff	0.00519335	0.0028053	0.0641313	0.169785
YAP6_deltaSignificantBindingSites_Agnostic_AboveCutOff	0.00500683	0.00299716	0.094816	0.213703
YAP7_deltaSignificantBindingSites_Agnostic_AboveCutOff	0.00636587	0.00289611	0.027944	0.105481
RDS2_deltaSignificantBindingSites_Agnostic_AboveCutOff	0.00835637	0.00291262	0.00411744	0.0287342
YGR067C_deltaSignificantBindingSites_Agnostic_AboveCutOff	0.00307952	0.00277281	0.266735	0.381691
YML081W_deltaSignificantBindingSites_Agnostic_AboveCutOff	0.00287695	0.00278693	0.30193	0.40161
ASG1_deltaSignificantBindingSites_Agnostic_AboveCutOff	-7.18252e-05	0.00251837	0.977247	0.621799
CEP3_deltaSignificantBindingSites_Agnostic_AboveCutOff	NA	NA	NA	NA
DOT6_deltaSignificantBindingSites_Agnostic_AboveCutOff	-0.00295507	0.00291551	0.31079	0.403415
ECM22_deltaSignificantBindingSites_Agnostic_AboveCutOff	-0.00285908	0.00300977	0.342147	0.417778
FHL1_deltaSignificantBindingSites_Agnostic_AboveCutOff	0.00168556	0.00290537	0.56181	0.508886
GAT1_deltaSignificantBindingSites_Agnostic_AboveCutOff	0.00995283	0.00278169	0.000346262	0.00422614
GAT4_deltaSignificantBindingSites_Agnostic_AboveCutOff	-0.00130877	0.00285449	0.646596	0.526226
HAL9_deltaSignificantBindingSites_Agnostic_AboveCutOff	0.0225207	0.00303959	1.27127e-13	9.53391e-12
LYS14_deltaSignificantBindingSites_Agnostic_AboveCutOff	NA	NA	NA	NA
MIG2_deltaSignificantBindingSites_Agnostic_AboveCutOff	0.00102588	0.00294803	0.72785	0.552803
MIG3_deltaSignificantBindingSites_Agnostic_AboveCutOff	-0.00105411	0.00233144	0.651176	0.526226
NDT80_deltaSignificantBindingSites_Agnostic_AboveCutOff	-0.000673469	0.006164	0.912997	0.604628
NHP6A_deltaSignificantBindingSites_Agnostic_AboveCutOff	0.00130713	0.00311358	0.674621	0.538322
NHP6B_deltaSignificantBindingSites_Agnostic_AboveCutOff	-0.00027784	0.00285424	0.922454	0.606825
OAF1_deltaSignificantBindingSites_Agnostic_AboveCutOff	0.00265058	0.00416697	0.524716	0.496259
PHO2_deltaSignificantBindingSites_Agnostic_AboveCutOff	0.000381321	0.00288248	0.894755	0.600865
RDR1_deltaSignificantBindingSites_Agnostic_AboveCutOff	NA	NA	NA	NA
RDS1_deltaSignificantBindingSites_Agnostic_AboveCutOff	NA	NA	NA	NA
SFL1_deltaSignificantBindingSites_Agnostic_AboveCutOff	-0.00308527	0.00278066	0.267194	0.382012
SFP1_deltaSignificantBindingSites_Agnostic_AboveCutOff	0.00569037	0.00269537	0.0347582	0.116326
SRD1_deltaSignificantBindingSites_Agnostic_AboveCutOff	NA	NA	NA	NA
STB3_deltaSignificantBindingSites_Agnostic_AboveCutOff	0.000816448	0.00233085	0.72613	0.552013
STP2_deltaSignificantBindingSites_Agnostic_AboveCutOff	0.0137202	0.00385931	0.000377846	0.00452737
SUT2_deltaSignificantBindingSites_Agnostic_AboveCutOff	-0.00275933	0.00466058	0.553812	0.504667
TBF1_deltaSignificantBindingSites_Agnostic_AboveCutOff	0.00110633	0.00312699	0.723489	0.552013
TBS1_deltaSignificantBindingSites_Agnostic_AboveCutOff	-0.00125395	0.00233136	0.590672	0.514248
TEA1_deltaSignificantBindingSites_Agnostic_AboveCutOff	NA	NA	NA	NA
TOD6_deltaSignificantBindingSites_Agnostic_AboveCutOff	0.0134648	0.00287191	2.75267e-06	5.62259e-05
YKL222C_deltaSignificantBindingSites_Agnostic_AboveCutOff	-0.000704629	0.00329581	0.830707	0.581421
YLL054C_deltaSignificantBindingSites_Agnostic_AboveCutOff	NA	NA	NA	NA
YPR013C_deltaSignificantBindingSites_Agnostic_AboveCutOff	0.00131716	0.00233084	0.572005	0.511766
YPR015C_deltaSignificantBindingSites_Agnostic_AboveCutOff	NA	NA	NA	NA
YRM1_deltaSignificantBindingSites_Agnostic_AboveCutOff	NA	NA	NA	NA
metaChangeInNumberOfTFBS_Agnostic_AboveCutOff	0.0233833	0.00286753	3.50564e-16	4.12792e-14
metaAverage_differenceOfMeans_Agnostic_AboveCutOff	0.0260864	0.00286478	8.55584e-20	1.74598e-17
metaMax_differenceOfMeans_Agnostic_AboveCutOff	0.0198623	0.0028296	2.2272e-12	1.19829e-10
metaAverage_differenceOfMax_Agnostic_AboveCutOff	0.0260238	0.00286988	1.21344e-19	2.10835e-17
metaMax_differenceOfMax_Agnostic_AboveCutOff	0.0198701	0.00282947	2.1787e-12	1.19829e-10
ABF2_differenceOfMax_Plus_BelowCutOff	0.00695115	0.00286214	0.0151551	0.0715238
CAT8_differenceOfMax_Plus_BelowCutOff	0.00455845	0.00286167	0.111176	0.236757
CST6_differenceOfMax_Plus_BelowCutOff	0.00615661	0.00290362	0.0339786	0.114956
ECM23_differenceOfMax_Plus_BelowCutOff	-0.00144192	0.00284716	0.612546	0.519243
EDS1_differenceOfMax_Plus_BelowCutOff	0.00277056	0.00287756	0.335641	0.417778
FKH2_differenceOfMax_Plus_BelowCutOff	0.00331885	0.00284731	0.243773	0.364065
FZF1_differenceOfMax_Plus_BelowCutOff	0.0060055	0.00285237	0.0352528	0.117256
GIS1_differenceOfMax_Plus_BelowCutOff	0.00345057	0.00285653	0.227064	0.349751
GSM1_differenceOfMax_Plus_BelowCutOff	0.00626691	0.00286126	0.0285055	0.105831
GZF3_differenceOfMax_Plus_BelowCutOff	0.00305279	0.00284523	0.283295	0.394001
HCM1_differenceOfMax_Plus_BelowCutOff	0.00259027	0.00284544	0.362653	0.424928
HMRA2_differenceOfMax_Plus_BelowCutOff	0.00297951	0.00283955	0.294046	0.397305
NHP10_differenceOfMax_Plus_BelowCutOff	0.0041926	0.00286325	0.143117	0.27516
PDR8_differenceOfMax_Plus_BelowCutOff	0.00365251	0.00284451	0.199122	0.332761
REB1_differenceOfMax_Plus_BelowCutOff	0.00464931	0.00287268	0.105564	0.229323
REI1_differenceOfMax_Plus_BelowCutOff	0.00212323	0.00283876	0.454494	0.470333
RSC30_differenceOfMax_Plus_BelowCutOff	0.00373108	0.00285151	0.190718	0.322915
RSC3_differenceOfMax_Plus_BelowCutOff	0.00383236	0.00281127	0.172815	0.303493
RSF2_differenceOfMax_Plus_BelowCutOff	0.00445979	0.00285209	0.117891	0.246627
STE12_differenceOfMax_Plus_BelowCutOff	-0.00426089	0.00285971	0.136231	0.267734
STP3_differenceOfMax_Plus_BelowCutOff	0.00374882	0.00286016	0.189958	0.322915
STP4_differenceOfMax_Plus_BelowCutOff	0.00466061	0.00287111	0.10453	0.228089
SWI5_differenceOfMax_Plus_BelowCutOff	0.00243502	0.00284563	0.39216	0.444113
TOS8_differenceOfMax_Plus_BelowCutOff	0.00258415	0.00284126	0.363081	0.425123
USV1_differenceOfMax_Plus_BelowCutOff	0.00305923	0.00285584	0.284071	0.394001
YER130C_differenceOfMax_Plus_BelowCutOff	0.00625842	0.00285347	0.0282881	0.105831
YER184C_differenceOfMax_Plus_BelowCutOff	0.00162435	0.00287227	0.571716	0.511766
YLR278C_differenceOfMax_Plus_BelowCutOff	0.000950194	0.00287963	0.741422	0.557949
YNR063W_differenceOfMax_Plus_BelowCutOff	0.00308975	0.00286656	0.281096	0.392213
YOX1_differenceOfMax_Plus_BelowCutOff	0.00700133	0.00284957	0.0140113	0.0681075
YPR022C_differenceOfMax_Plus_BelowCutOff	0.00302936	0.00285255	0.288244	0.395387
YPR196W_differenceOfMax_Plus_BelowCutOff	-0.00250686	0.00288674	0.385172	0.439095
ACA1_differenceOfMax_Plus_BelowCutOff	0.0071503	0.00282844	0.0114713	0.0582102
ADR1_differenceOfMax_Plus_BelowCutOff	-0.000425691	0.00283439	0.880616	0.595483
AFT1_differenceOfMax_Plus_BelowCutOff	-0.000250087	0.00289181	0.931084	0.607924
DAL81_differenceOfMax_Plus_BelowCutOff	0.00305671	0.00283278	0.280567	0.391811
DAL82_differenceOfMax_Plus_BelowCutOff	0.000238271	0.00284179	0.933179	0.607924
DIG1_differenceOfMax_Plus_BelowCutOff	0.00313948	0.00285441	0.271389	0.385631
FKH1_differenceOfMax_Plus_BelowCutOff	0.0012048	0.00286993	0.674632	0.538322
MIG1_differenceOfMax_Plus_BelowCutOff	0.00406004	0.00283006	0.151398	0.284348
OPI1_differenceOfMax_Plus_BelowCutOff	0.00226728	0.00285508	0.427124	0.461517
PIP2_differenceOfMax_Plus_BelowCutOff	0.00721308	0.00284842	0.0113313	0.058043
PPR1_differenceOfMax_Plus_BelowCutOff	0.00162477	0.00283336	0.566344	0.51022
RGM1_differenceOfMax_Plus_BelowCutOff	0.00698611	0.00284878	0.0141938	0.0685836
RTG1_differenceOfMax_Plus_BelowCutOff	0.00259295	0.00286777	0.365907	0.427814
SKN7_differenceOfMax_Plus_BelowCutOff	0.00691923	0.00286519	0.0157381	0.0730018
UPC2_differenceOfMax_Plus_BelowCutOff	-0.000354886	0.00285384	0.901035	0.603584
WAR1_differenceOfMax_Plus_BelowCutOff	0.00229467	0.00282458	0.416566	0.456775
XBP1_differenceOfMax_Plus_BelowCutOff	0.00426347	0.00282727	0.131559	0.263232
AFT2_differenceOfMax_Plus_BelowCutOff	-0.00116573	0.00286281	0.683862	0.540859
MATA2_differenceOfMax_Plus_BelowCutOff	0.00132072	0.00283028	0.640758	0.526226
MSN1_differenceOfMax_Plus_BelowCutOff	-0.0014236	0.00283573	0.615652	0.52001
NRG2_differenceOfMax_Plus_BelowCutOff	0.00061249	0.00287431	0.831256	0.581555
ROX1_differenceOfMax_Plus_BelowCutOff	-0.00289648	0.00286465	0.311963	0.403415
DAL80_differenceOfMax_Plus_BelowCutOff	0.000933795	0.00285716	0.743799	0.557949
GLN3_differenceOfMax_Plus_BelowCutOff	0.00207298	0.00283775	0.465083	0.476102
HAP4_differenceOfMax_Plus_BelowCutOff	-0.000181681	0.00285515	0.949263	0.613823
MET4_differenceOfMax_Plus_BelowCutOff	0.00213023	0.0028478	0.454443	0.470333
MOT2_differenceOfMax_Plus_BelowCutOff	0.00598389	0.00285852	0.0363177	0.119571
MSN2_differenceOfMax_Plus_BelowCutOff	-0.00136299	0.00285207	0.632723	0.526226
MSN4_differenceOfMax_Plus_BelowCutOff	0.00398916	0.00285258	0.161981	0.295
NDD1_differenceOfMax_Plus_BelowCutOff	0.00512742	0.00285391	0.0723941	0.183422
RIM101_differenceOfMax_Plus_BelowCutOff	-0.000520861	0.00286028	0.855503	0.586638
SOK2_differenceOfMax_Plus_BelowCutOff	0.00233921	0.00287687	0.416156	0.456634
SPT23_differenceOfMax_Plus_BelowCutOff	0.00166158	0.00292321	0.569758	0.511164
SPT2_differenceOfMax_Plus_BelowCutOff	0.00587331	0.00285499	0.0396664	0.126108
STB1_differenceOfMax_Plus_BelowCutOff	0.00317011	0.00281693	0.260429	0.375316
STB5_differenceOfMax_Plus_BelowCutOff	0.00204039	0.00284558	0.473351	0.478543
SUT1_differenceOfMax_Plus_BelowCutOff	0.00471705	0.00282972	0.0955207	0.214204
THO2_differenceOfMax_Plus_BelowCutOff	0.000186095	0.00288272	0.948528	0.613823
UME1_differenceOfMax_Plus_BelowCutOff	0.00451241	0.002838	0.111836	0.237539
ZAP1_differenceOfMax_Plus_BelowCutOff	0.00334251	0.00283244	0.237968	0.360555
ABF1_differenceOfMax_Plus_BelowCutOff	0.00738371	0.00284306	0.00940155	0.0514056
ACE2_differenceOfMax_Plus_BelowCutOff	0.00805127	0.00283571	0.00452209	0.0308698
ARG81_differenceOfMax_Plus_BelowCutOff	0.00332425	0.00281888	0.238287	0.360701
ASH1_differenceOfMax_Plus_BelowCutOff	0.00258801	0.00281643	0.358149	0.422683
AZF1_differenceOfMax_Plus_BelowCutOff	0.00496874	0.00284948	0.081205	0.195811
CBF1_differenceOfMax_Plus_BelowCutOff	0.00140402	0.00289655	0.627874	0.52393
GAL4_differenceOfMax_Plus_BelowCutOff	0.0062511	0.00282767	0.0270576	0.103096
GAT3_differenceOfMax_Plus_BelowCutOff	0.00243248	0.00285612	0.394397	0.445713
GCR2_differenceOfMax_Plus_BelowCutOff	0.00197585	0.00286973	0.491129	0.483534
GTS1_differenceOfMax_Plus_BelowCutOff	0.000164727	0.0028446	0.953821	0.615371
HAC1_differenceOfMax_Plus_BelowCutOff	0.0057924	0.00284505	0.0417545	0.129829
HAP2_differenceOfMax_Plus_BelowCutOff	0.00666911	0.00283834	0.018791	0.0815607
IME1_differenceOfMax_Plus_BelowCutOff	0.00357646	0.00283605	0.207283	0.339985
IXR1_differenceOfMax_Plus_BelowCutOff	0.000775672	0.00285249	0.785677	0.569457
JHD1_differenceOfMax_Plus_BelowCutOff	0.00735997	0.00283686	0.00947538	0.0516354
MATA1_differenceOfMax_Plus_BelowCutOff	0.00488283	0.00282225	0.0836092	0.198806
MET32_differenceOfMax_Plus_BelowCutOff	0.00332314	0.00285276	0.244066	0.364065
MOT3_differenceOfMax_Plus_BelowCutOff	0.00537609	0.00286662	0.060736	0.165106
PDR1_differenceOfMax_Plus_BelowCutOff	0.00435262	0.00287822	0.130467	0.262015
RFX1_differenceOfMax_Plus_BelowCutOff	0.00380846	0.00283738	0.179517	0.312553
RGT1_differenceOfMax_Plus_BelowCutOff	-9.63166e-05	0.00281895	0.972744	0.620811
RME1_differenceOfMax_Plus_BelowCutOff	0.00438103	0.00283884	0.12277	0.253782
RTG3_differenceOfMax_Plus_BelowCutOff	0.00755393	0.00284587	0.00794622	0.0450114
SKO1_differenceOfMax_Plus_BelowCutOff	0.000948274	0.00285645	0.739907	0.557785
SNF1_differenceOfMax_Plus_BelowCutOff	0.0064126	0.00284009	0.0239528	0.0964762
SNT2_differenceOfMax_Plus_BelowCutOff	0.00219031	0.0028565	0.443212	0.467007
STB2_differenceOfMax_Plus_BelowCutOff	0.0050278	0.00288042	0.0808956	0.195355
STP1_differenceOfMax_Plus_BelowCutOff	-0.000931121	0.00286412	0.745106	0.557949
SWI4_differenceOfMax_Plus_BelowCutOff	0.00604075	0.00287051	0.0353423	0.117313
SWI6_differenceOfMax_Plus_BelowCutOff	-0.00125739	0.00287625	0.661993	0.531634
THI2_differenceOfMax_Plus_BelowCutOff	0.000932308	0.00284855	0.743447	0.557949
URC2_differenceOfMax_Plus_BelowCutOff	0.00118598	0.00285424	0.677764	0.539687
YHP1_differenceOfMax_Plus_BelowCutOff	0.000311075	0.00283112	0.912507	0.604628
YRR1_differenceOfMax_Plus_BelowCutOff	0.00797514	0.00284435	0.00504953	0.0332117
ARG80_differenceOfMax_Plus_BelowCutOff	0.00303278	0.00283021	0.283911	0.394001
ARO80_differenceOfMax_Plus_BelowCutOff	0.00205353	0.00287066	0.474391	0.478543
ARR1_differenceOfMax_Plus_BelowCutOff	0.00139202	0.00278265	0.6169	0.52001
CHA4_differenceOfMax_Plus_BelowCutOff	0.00269406	0.00284011	0.342837	0.417778
CUP9_differenceOfMax_Plus_BelowCutOff	0.00307172	0.00287082	0.284629	0.394001
HMS1_differenceOfMax_Plus_BelowCutOff	0.00772821	0.00287064	0.00709917	0.0423914
INO2_differenceOfMax_Plus_BelowCutOff	0.00460433	0.00284385	0.105436	0.229323
MCM1_differenceOfMax_Plus_BelowCutOff	0.00224516	0.0028324	0.42797	0.461517
MET28_differenceOfMax_Plus_BelowCutOff	0.0077402	0.00285612	0.00672758	0.0409259
MGA1_differenceOfMax_Plus_BelowCutOff	0.00610444	0.00287986	0.0340316	0.114956
PDR3_differenceOfMax_Plus_BelowCutOff	0.00515678	0.00288507	0.0738723	0.186137
PHO4_differenceOfMax_Plus_BelowCutOff	0.00812678	0.00283589	0.00416109	0.0288937
PUT3_differenceOfMax_Plus_BelowCutOff	-0.001408	0.00284118	0.620198	0.520686
RAP1_differenceOfMax_Plus_BelowCutOff	0.00695744	0.00282761	0.013873	0.0678412
SMP1_differenceOfMax_Plus_BelowCutOff	0.00513253	0.00285939	0.0726578	0.183664
UGA3_differenceOfMax_Plus_BelowCutOff	0.00502708	0.00281911	0.0745512	0.186229
YAP3_differenceOfMax_Plus_BelowCutOff	0.00333834	0.00278522	0.230687	0.352818
YAP5_differenceOfMax_Plus_BelowCutOff	-0.00137345	0.00283988	0.628648	0.524306
CUP2_differenceOfMax_Plus_BelowCutOff	0.000471069	0.00283352	0.867961	0.5922
GAL80_differenceOfMax_Plus_BelowCutOff	0.00484041	0.00285936	0.0904878	0.207812
HAP5_differenceOfMax_Plus_BelowCutOff	0.00130117	0.00279988	0.64213	0.526226
HSF1_differenceOfMax_Plus_BelowCutOff	0.00359837	0.00289193	0.213397	0.341835
INO4_differenceOfMax_Plus_BelowCutOff	0.00424498	0.00284745	0.136013	0.267734
MATALPHA2_differenceOfMax_Plus_BelowCutOff	0.00346441	0.0028707	0.227504	0.349751
ORC1_differenceOfMax_Plus_BelowCutOff	0.00818329	0.00280505	0.00353024	0.0250544
SPT15_differenceOfMax_Plus_BelowCutOff	0.00232297	0.00286596	0.417631	0.45685
STB4_differenceOfMax_Plus_BelowCutOff	0.00455787	0.0028393	0.108432	0.231551
SUM1_differenceOfMax_Plus_BelowCutOff	0.00406755	0.00285169	0.153762	0.287451
UME6_differenceOfMax_Plus_BelowCutOff	0.00639382	0.00284296	0.0245125	0.0975208
YAP1_differenceOfMax_Plus_BelowCutOff	0.00513012	0.00283771	0.0706317	0.180054
YDR026C_differenceOfMax_Plus_BelowCutOff	0.00449905	0.0028463	0.113954	0.240954
BAS1_differenceOfMax_Plus_BelowCutOff	0.00252907	0.00285117	0.375063	0.434482
CAD1_differenceOfMax_Plus_BelowCutOff	0.00508572	0.00286498	0.0758758	0.186945
CIN5_differenceOfMax_Plus_BelowCutOff	0.00783439	0.00280845	0.00527775	0.0338907
CRZ1_differenceOfMax_Plus_BelowCutOff	0.00479021	0.00284639	0.0923928	0.210878
ERT1_differenceOfMax_Plus_BelowCutOff	0.00303822	0.00287752	0.291037	0.396779
GCN4_differenceOfMax_Plus_BelowCutOff	0.00318282	0.00283388	0.261382	0.376229
GCR1_differenceOfMax_Plus_BelowCutOff	0.000978955	0.00285003	0.731231	0.554221
HAP1_differenceOfMax_Plus_BelowCutOff	0.00520769	0.00286859	0.0694593	0.178102
HAP3_differenceOfMax_Plus_BelowCutOff	0.00667239	0.00282873	0.0183346	0.0802275
LEU3_differenceOfMax_Plus_BelowCutOff	0.00268324	0.00284676	0.345906	0.417778
MAC1_differenceOfMax_Plus_BelowCutOff	0.00355182	0.00284695	0.212182	0.341371
MBP1_differenceOfMax_Plus_BelowCutOff	0.00459818	0.00286157	0.108082	0.231551
MET31_differenceOfMax_Plus_BelowCutOff	0.00510658	0.00281984	0.0701488	0.179278
NRG1_differenceOfMax_Plus_BelowCutOff	0.00335746	0.00284181	0.237422	0.360228
PHD1_differenceOfMax_Plus_BelowCutOff	0.00242301	0.00283024	0.391933	0.444113
RLM1_differenceOfMax_Plus_BelowCutOff	0.010768	0.00286906	0.000174622	0.00254294
RPH1_differenceOfMax_Plus_BelowCutOff	0.00332196	0.00285884	0.245237	0.364348
RPN4_differenceOfMax_Plus_BelowCutOff	0.00329474	0.0028526	0.248093	0.367137
SIP4_differenceOfMax_Plus_BelowCutOff	0.00414283	0.00285413	0.146635	0.278949
TEC1_differenceOfMax_Plus_BelowCutOff	0.000739898	0.00284519	0.794823	0.573092
TYE7_differenceOfMax_Plus_BelowCutOff	0.00583991	0.0028636	0.0414138	0.129028
YAP6_differenceOfMax_Plus_BelowCutOff	0.00769617	0.00286369	0.00719899	0.0425518
YAP7_differenceOfMax_Plus_BelowCutOff	0.00682122	0.00287699	0.0177422	0.0784024
RDS2_differenceOfMax_Plus_BelowCutOff	0.00202068	0.00287944	0.482827	0.479352
YGR067C_differenceOfMax_Plus_BelowCutOff	0.00254103	0.00288482	0.378411	0.43677
YML081W_differenceOfMax_Plus_BelowCutOff	0.0034743	0.00283104	0.219742	0.344173
ASG1_differenceOfMax_Plus_BelowCutOff	0.00524627	0.00285382	0.0660133	0.173352
CEP3_differenceOfMax_Plus_BelowCutOff	0.00763428	0.00286043	0.00760946	0.0443895
DOT6_differenceOfMax_Plus_BelowCutOff	9.54294e-05	0.00285556	0.973341	0.620811
ECM22_differenceOfMax_Plus_BelowCutOff	0.00545953	0.00287154	0.0572685	0.158067
FHL1_differenceOfMax_Plus_BelowCutOff	0.00477629	0.0028188	0.0901813	0.207583
GAT1_differenceOfMax_Plus_BelowCutOff	0.00467758	0.00283469	0.0989182	0.219293
GAT4_differenceOfMax_Plus_BelowCutOff	0.00476791	0.00285917	0.0953982	0.214204
HAL9_differenceOfMax_Plus_BelowCutOff	0.000155902	0.00288015	0.956832	0.615557
LYS14_differenceOfMax_Plus_BelowCutOff	0.00289008	0.00285378	0.311195	0.403415
MIG2_differenceOfMax_Plus_BelowCutOff	0.00202733	0.00283544	0.474612	0.478543
MIG3_differenceOfMax_Plus_BelowCutOff	0.00216999	0.00283854	0.444585	0.467007
NDT80_differenceOfMax_Plus_BelowCutOff	0.00267064	0.00286231	0.350801	0.420883
NHP6A_differenceOfMax_Plus_BelowCutOff	0.00764831	0.00286097	0.00751037	0.044036
NHP6B_differenceOfMax_Plus_BelowCutOff	0.00882058	0.00289761	0.00233386	0.0184351
OAF1_differenceOfMax_Plus_BelowCutOff	0.00531676	0.00287501	0.0644138	0.170057
PHO2_differenceOfMax_Plus_BelowCutOff	0.00470963	0.00286352	0.100032	0.220556
RDR1_differenceOfMax_Plus_BelowCutOff	0.00405432	0.00284784	0.15455	0.28775
RDS1_differenceOfMax_Plus_BelowCutOff	0.00762875	0.00283025	0.0070296	0.0421311
SFL1_differenceOfMax_Plus_BelowCutOff	0.0010337	0.00284666	0.71651	0.550629
SFP1_differenceOfMax_Plus_BelowCutOff	0.0038235	0.00286317	0.181743	0.31474
SRD1_differenceOfMax_Plus_BelowCutOff	0.00686125	0.00286149	0.0164943	0.0741795
STB3_differenceOfMax_Plus_BelowCutOff	0.00672734	0.00280347	0.0164106	0.0740083
STP2_differenceOfMax_Plus_BelowCutOff	0.00382671	0.00284644	0.178824	0.311681
SUT2_differenceOfMax_Plus_BelowCutOff	0.00516809	0.00285915	0.0706744	0.180054
TBF1_differenceOfMax_Plus_BelowCutOff	0.00484181	0.00286062	0.0905368	0.207812
TBS1_differenceOfMax_Plus_BelowCutOff	0.000605326	0.00286713	0.832789	0.582376
[truncated: 999 more rows]
